# Supplementary material for: Comparative transcriptomics reveals the difference in early endosperm development between maize with different amylose contents
Source: PeerJ journal article supplement (doi:10.7717/peerj.7528), 2019-08-28
Supplement: Supplementary_Figure_5.pdf [file Supplementary_Figure_5.pdf]

**A**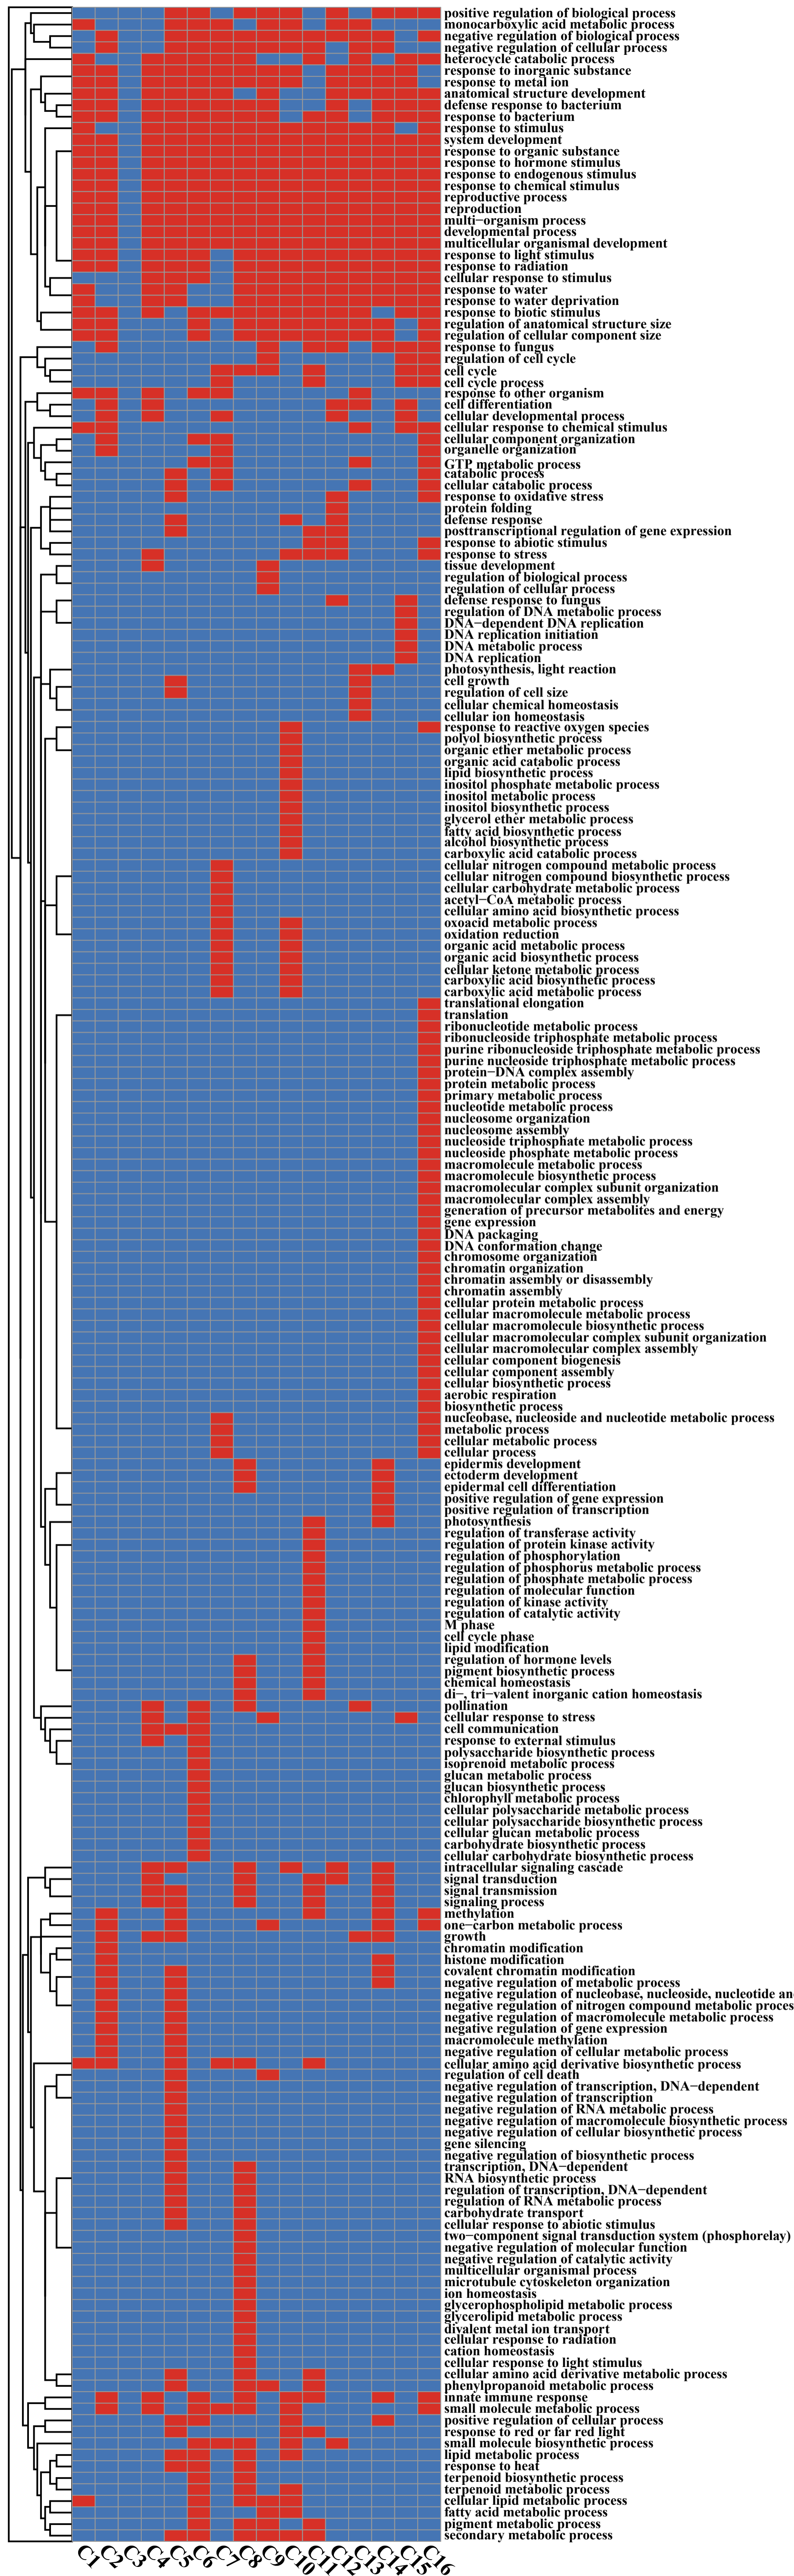**B**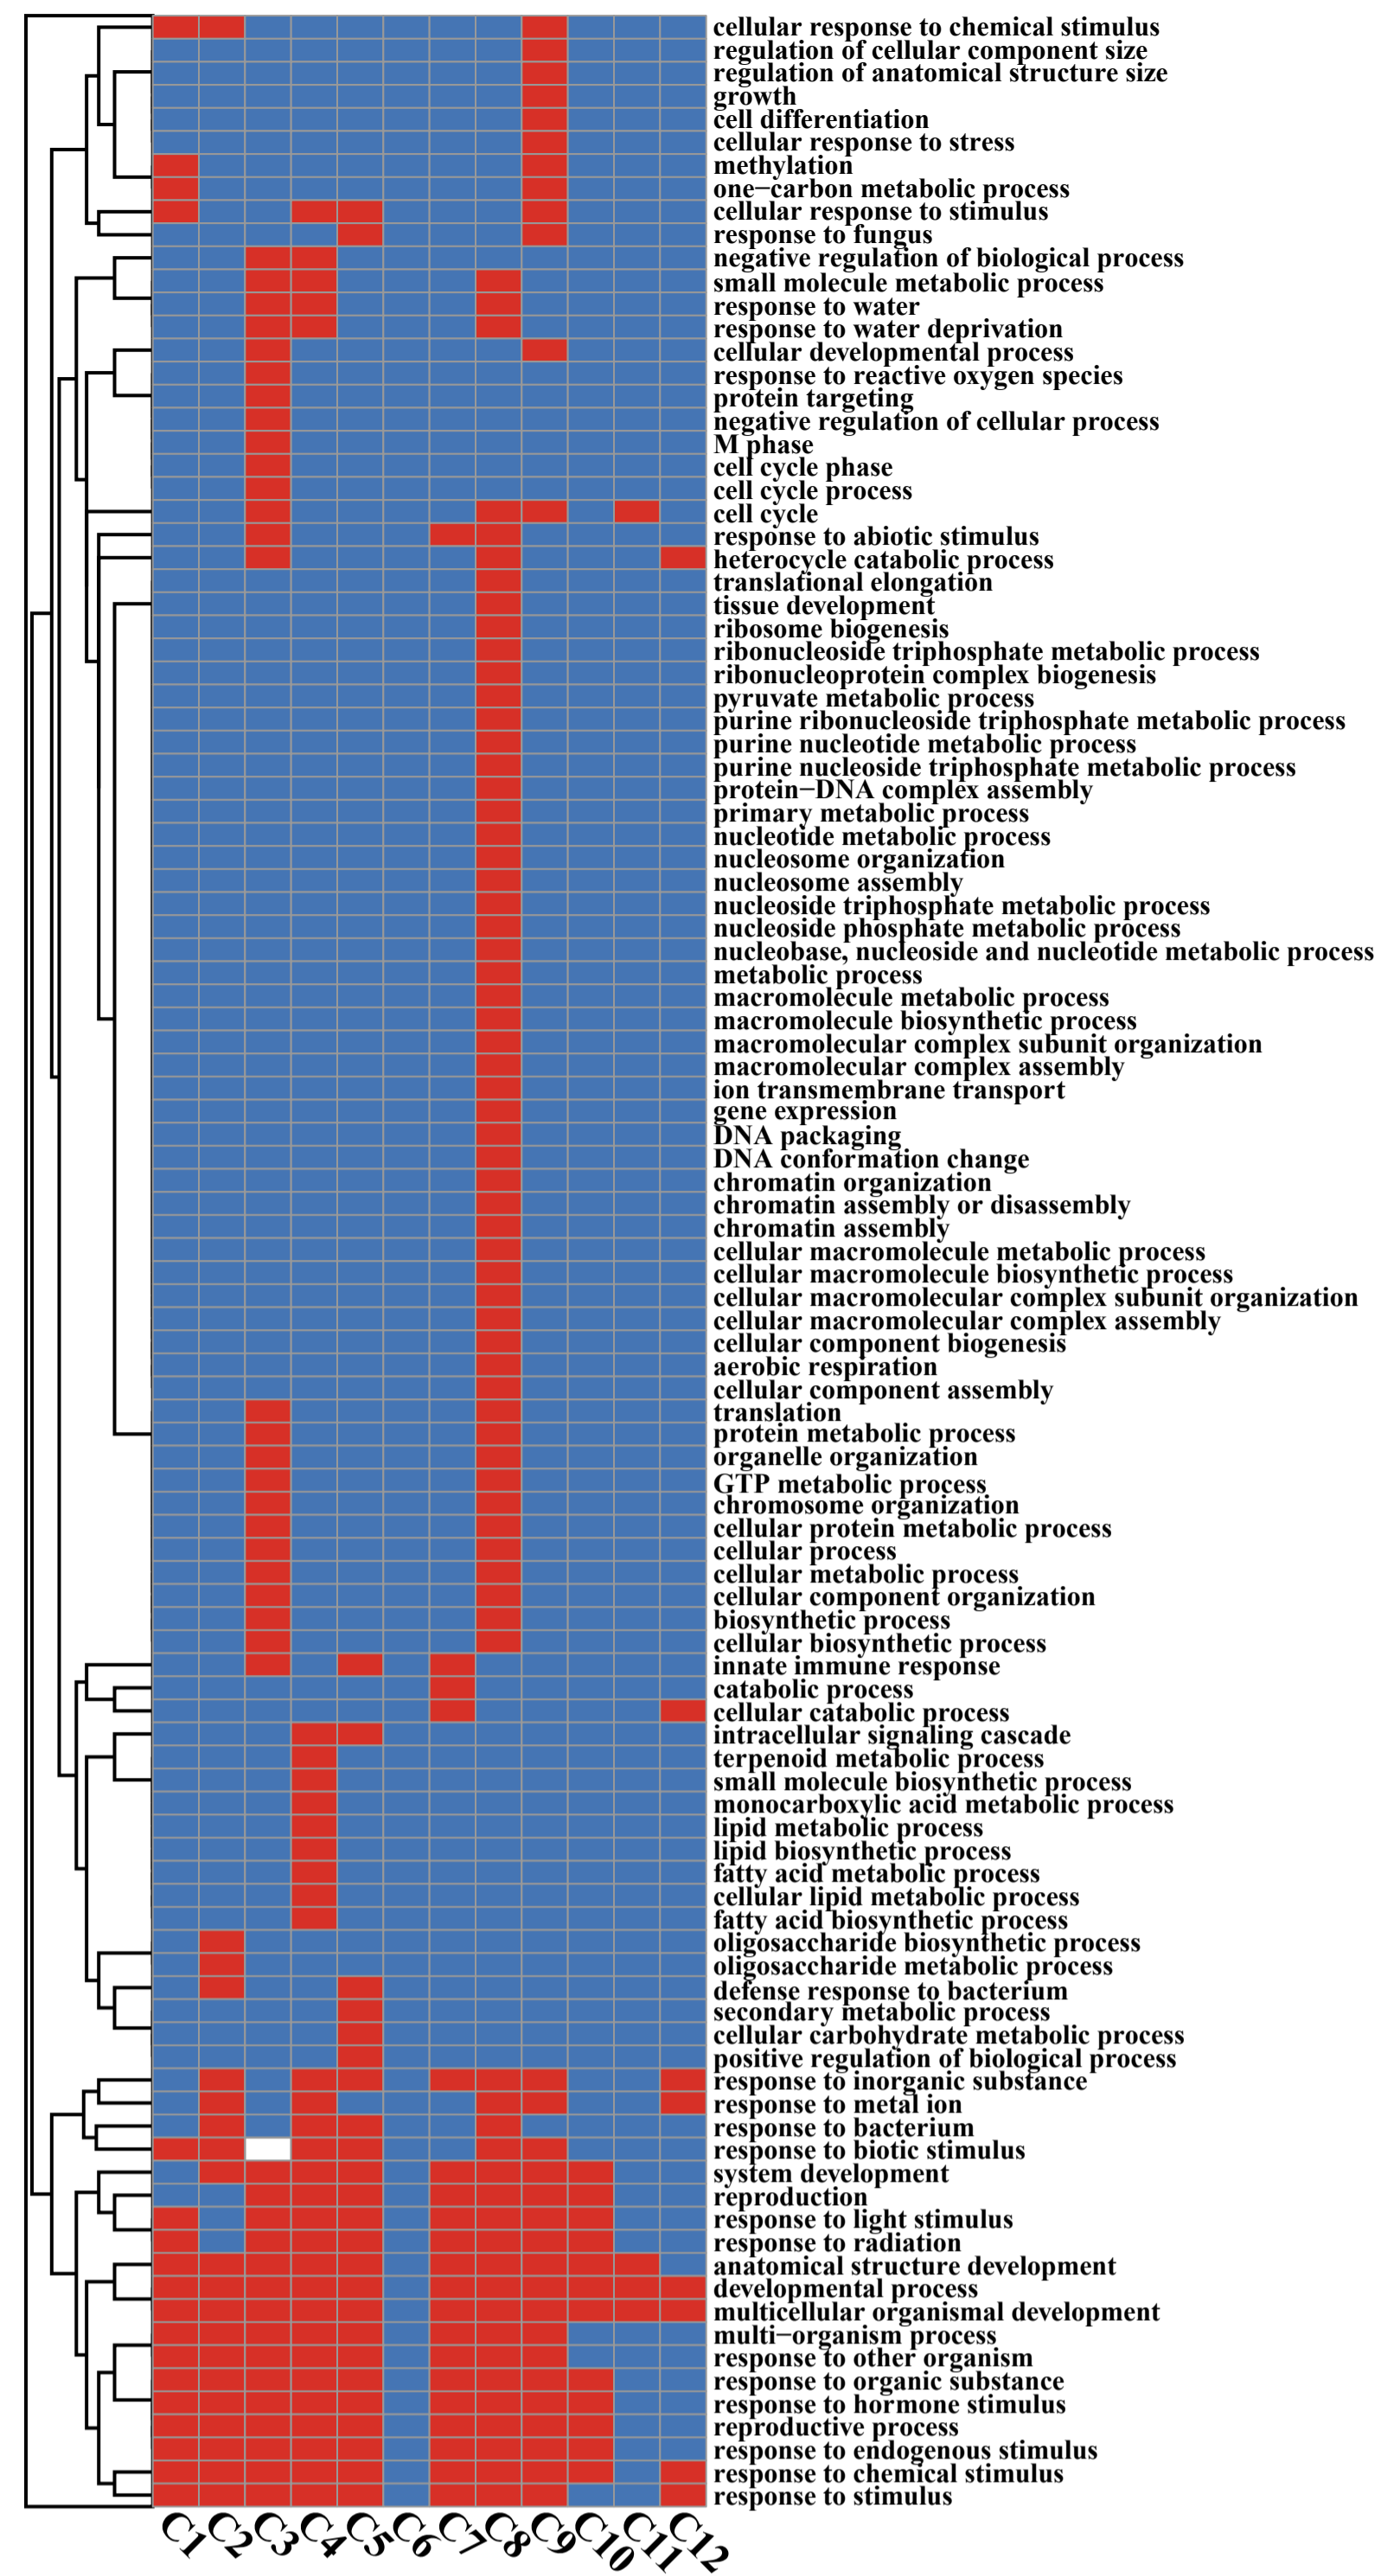**C**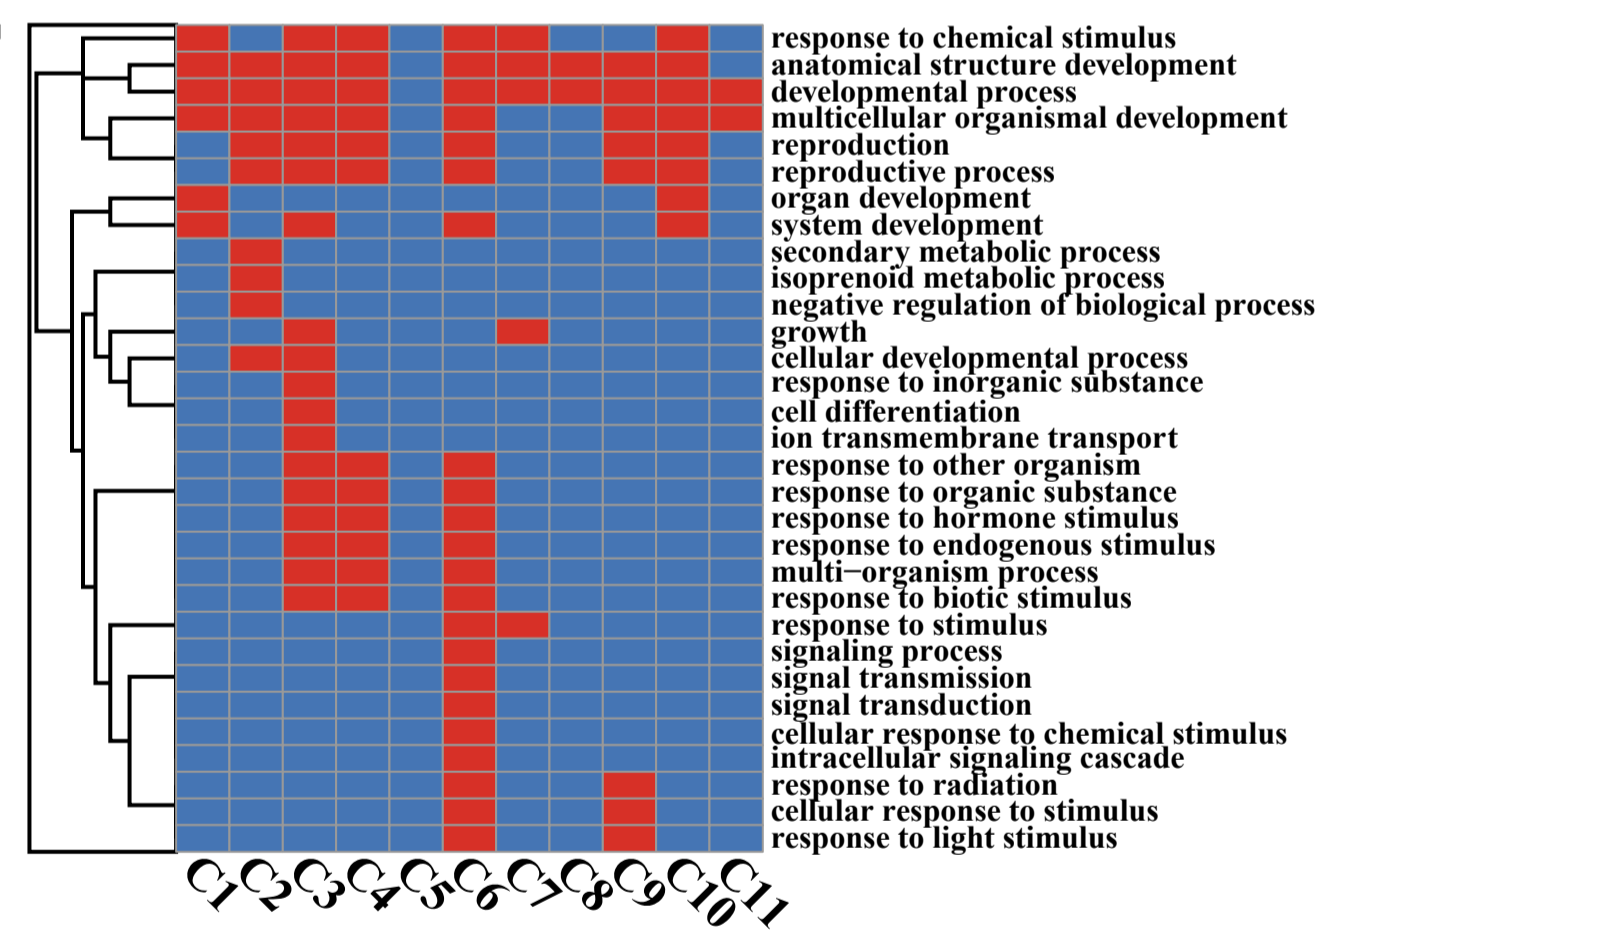

■ Annotation

■ No annotation
