# Supplementary material for: Comparative transcriptomics reveals the difference in early endosperm development between maize with different amylose contents
Source: PeerJ. 2019 Aug 28;7:e7528. doi: 10.7717/peerj.7528 (PMC6717500; doi:10.7717/peerj.7528)
Supplement: Table S1 [file peerj-07-7528-s008.xlsx]

## Sheet: Gene Expression Primer
Table S1 List of primers used for the qRT-PCR gene detection analysis
Name	Gene ID	Forward primer sequence	Reverse primer sequence	Aplicon
wx1	GRMZM2G024993	ACTGCAACGTCGTGGAGC	AGTTCCTCACCATCTCCTCGT	105
ZmMADS	GRMZM2G099522	TCCTTCAGCACCTGGACAAC	ATCGACCATGCTCATTCGGG	111
27-kD γ-zein	GRMZM2G138727	GGTGTCCCCCACTGAAGAAAC	ACACTGACACTGCCACCCA	126
ZmActin	GRMZM2G082484	ACATTCAGCCCCTAGTCTGT	TTCCATGTCATCCCAGTTGC	128
beta-amylase	GRMZM2G450125	TGTGTTCGATCGCTAGACGG	CTTCCGCTGTACGCACACTA	134
zpu1	GRMZM2G158043	TTGCGGAAAATCAACGTGGG	TCCATTTGGCTCTAAGAACAATCC	164
iso2	GRMZM2G090905	GCTACACGTTTGTGTGGCAG	GCCTGGTTTGAAAGACTGCG	196
o2	GRMZM2G015534	GCCACAGAGATGAACCGAGT	ATGTTCCCAGCGATCACGAA	202
floury2	GRMZM2G397687	GTCAAACTCTGCTGCGTACC	GGGCACCATTGTCGAGTACA	208
GBSSI	GRMZM2G008263	GTGTCCAGTCAGACACGGTT	ACTCCATCGTGACCCTACCA	221
sugary2	GRMZM2G348551	TGGTGTGTGCTACGGAGATG	CGGGATCGTACAGCTCGAAA	230
ZmERF	GRMZM2G129674	TTCGTTGACCACTCACTCCG	GCTTCTGCTTATTGGCTGCT	238
