# Supplementary material for: Comparative transcriptomics reveals the difference in early endosperm development between maize with different amylose contents
Source: PeerJ. 2019 Aug 28;7:e7528. doi: 10.7717/peerj.7528 (PMC6717500; doi:10.7717/peerj.7528)
Supplement: Table S2 [file peerj-07-7528-s009.xlsx]

## Sheet: Sheet1
Table S2 Statistical analysis of the sequenced and mapped reads of SD609 and HS68
Category	DAP	Clean reads	Mapped reads (%)	Mapped paired-end reads (%)	Unique mapped (%)
SD609	5	49371842	37,116,834 (75.18%)	29,837,791 (80.39%)	35,613,951 (95.95%)
	10	48483950	34,258,081 (70.66%)	27,152,144 (79.26%)	32,637,616 (95.27%)
	15	50254726	37,822,718 (75.26%)	30,235,950 (79.94%)	36,315,790 (96.02%)
	20	44555238	33,378,835 (74.92%)	26,820,479 (80.35%)	31,805,531 (95.29%)
HS68	5	55578354	40,988,440 (73.75%)	32,820,766 (80.07%)	39,149,037 (95.51%)
	10	44924092	32,582,472 (72.53%)	25,900,388 (79.49%)	30,514,815 (93.65%)
	15	52520182	40,240,839 (76.62%)	32,725,308 (81.32%)	38,590,799 (95.09%)
	20	50647278	36,974,274 (73.00%)	30,075,422 (81.34%)	35,058,134 (94.82%)
