# Supplementary material for: Comparative transcriptomics reveals the difference in early endosperm development between maize with different amylose contents
Source: PeerJ. 2019 Aug 28;7:e7528. doi: 10.7717/peerj.7528 (PMC6717500; doi:10.7717/peerj.7528)
Supplement: Table S3 [file peerj-07-7528-s010.xlsx]

## Sheet: SD609 and HS68
Table S3 Information on the expressed genes of SD609 and HS68
SD609
All detected genes					Annotated genes
Stages Levels	5-DAP	10-DAP	15-DAP	20-DAP	Stages Levels	5-DAP	10-DAP	15-DAP	20-DAP
0<FPKM≤1	7601	7282	7816	7075	0<FPKM≤1	6752	6522	7007	6355
1<FPKM≤5	6165	6522	6486	6445	1<FPKM≤5	5387	5735	5683	5603
5<FPKM≤10	3448	3686	3776	3622	5<FPKM≤10	3219	3431	3538	3371
10<FPKM≤100	9233	10043	9304	9696	10<FPKM≤100	8980	9776	9068	9433
>100	1931	1672	1922	1885	>100	1903	1653	1902	1864
Total	28378	29205	29304	28723	Total	26241	27117	27198	26626
HS68
All detected genes					Annotated genes
Stages Levels	5-DAP	10-DAP	15-DAP	20-DAP	Stages Levels	5-DAP	10-DAP	15-DAP	20-DAP
0<FPKM≤1	7691	7186	7990	7230	0<FPKM≤1	6873	6403	7054	6345
1<FPKM≤5	6486	6341	6275	6299	1<FPKM≤5	5078	5558	5532	5462
5<FPKM≤10	3645	3632	3668	3455	5<FPKM≤10	3418	3400	3456	3236
10<FPKM≤100	9153	9546	9538	9265	10<FPKM≤100	8907	9320	9316	9035
>100	1899	1716	1871	1895	>100	1879	1697	1844	1875
Total	28874	28421	29342	28144	Total	26155	26378	27202	25953
GeneID	Gene_position	Length	Strand	SD609				HS68				TF
				5 DAP FPKM	10 DAP FPKM	15 DAP FPKM	20 DAP FPKM	5 DAP FPKM	10 DAP FPKM	15 DAP FPKM	20 DAP FPKM
AC147602.5_FG004	3:178846540-178848005	483	-	0.608463	0	1.7636	0.255374	0.548793	0	0.494257	1.02321
AC148152.3_FG001	2:231358787-231360623	1599	-	0.155971	0.361296	1.01626	0.393301	0	0	0	0
AC148152.3_FG005	2:231282990-231284358	1155	-	0.287286	2.84113	0.589984	3.11458	0.367195	0.287984	0.231158	0.363193
AC148152.3_FG006	2:231237972-231241353	1047	+	0	0	0.0512935	0	0	0.0813644	0	0
AC148152.3_FG008	2:231209371-231213678	1971	-	0.122884	0.0316195	0.242619	0.154945	0.196773	0.46202	0.148056	0.310841
AC148167.6_FG001	7:11665130-11671217	1912	+	26.3629	33.3711	18.652	45.2547	22.6785	31.127	20.7245	34.0511
AC149475.2_FG002	9:152485305-152488367	669	-	102.013	51.241	65.6389	115.337	30.9769	38.7485	85.1996	98.8879
AC149475.2_FG003	9:152490622-152495158	1064	-	99.4988	58.7114	99.8285	75.545	73.8012	68.4276	82.3351	69.938
AC149475.2_FG005	9:152524853-152536126	5184	+	3.94622	4.57983	4.03358	4.66528	3.00189	5.37359	4.52734	3.66662	C2H2
AC149475.2_FG007	9:152556214-152556891	678	-	0	0	0	1.08383	0	0	0	0
AC149810.2_FG003	9:151584788-151593594	4326	-	13.7728	12.0253	11.2448	10.6658	17.8591	13.781	15.4654	12.0403
AC149810.2_FG004	9:151597278-151597925	648	-	0.875742	0.258338	0.889677	0.788117	1.24928	0.626761	0.909975	1.42188
AC149810.2_FG008	9:151631194-151634175	2030	+	0.160275	0.929142	0.546886	0.821329	0.584652	1.04313	0.429231	0.60584
AC149818.2_FG001	9:152414975-152420189	930	+	8.31585	7.0133	3.8817	5.05022	12.8179	19.9851	9.56136	12.2297
AC149818.2_FG004	9:152436266-152437593	949	+	59.8027	55.7653	82.8371	50.3612	50.3866	67.5159	64.0183	39.8143
AC149818.2_FG005	9:152441561-152442438	582	-	1.32976	2.74798	2.91902	2.23344	0.937125	2.03527	2.15257	1.11909
AC149818.2_FG006	9:152443043-152445498	590	-	26.6121	33.9559	43.5435	56.3817	20.6137	26.5655	35.7048	35.5493
AC149818.2_FG007	9:152453633-152454922	1290	-	1.40632	1.6553	1.78514	1.9629	2.52352	2.76926	1.57536	1.6511
AC149818.2_FG008	9:152459143-152462592	3210	-	4.20381	3.776	1.71426	3.06829	3.38129	4.17782	3.77284	3.45213	C2H2
AC149818.2_FG009	9:152481093-152481920	699	-	0.447433	0.23088	0.265143	0.281914	0.203315	0	0.361294	0.282575	LBD
AC149828.2_FG002	9:150418786-150423446	691	+	73.588	37.4633	69.7293	32.5694	71.4783	59.7431	71.0887	30.873
AC149828.2_FG004	9:150487074-150487466	393	+	0	0	0	0.385775	0	0	0	0
AC149828.2_FG005	9:150508134-150508907	774	+	0	0	0	0	0	0.121244	0.0780763	0
AC149829.2_FG002	9:151116517-151116771	255	-	1155.05	1286.96	381.77	305.165	395.114	649.404	625.291	791.551
AC149829.2_FG003	9:151118003-151122684	3641	-	18.3617	15.7964	9.71318	9.57022	15.6584	17.2735	13.2766	11.9195
AC149829.2_FG004	9:151128745-151129980	1000	-	0.968337	1.41879	2.28375	1.38831	3.12364	1.89747	1.99544	1.39214	bHLH
AC149829.2_FG006	9:151149416-151150702	1287	-	22.2767	30.9192	31.4807	32.1367	29.818	39.2647	30.2812	24.6912
AC150739.3_FG001	9:155180732-155184792	2662	+	2.7853	3.49375	2.68011	2.89451	3.01274	2.29072	3.39539	2.59257
AC152495.1_FG002	10:3280568-3284464	3897	-	0.336741	0.361466	0.416219	0.350801	0.308544	0.220212	0.223207	0.148178
AC152495.1_FG003	10:3296163-3304271	5794	-	0.814041	1.21826	1.48118	1.0469	0.815973	0.883006	1.52081	1.11035
AC152495.1_FG010	10:3369199-3373083	3885	-	0.117511	0.151104	0.197191	0.129665	0.174964	0.165699	0.0825034	0.0371658
AC152495.1_FG011	10:3374430-3375797	1368	+	0	0	0	0	0.128352	0.0586726	0.0376472	0
AC152495.1_FG012	10:3382115-3385323	2559	-	0.982163	2.11948	0.626322	0.440261	3.64379	3.17846	0.305539	0.601308
AC152495.1_FG013	10:3393689-3396738	2736	+	0	0	0	0	0	0	0	0
AC152495.1_FG015	10:3401150-3402412	1263	-	0	0	0	0.0649538	0	0	0	0.0651422
AC152495.1_FG017	10:3438490-3441711	3222	-	0	0	0	0	0.591268	1.19107	0	0
AC155352.2_FG001	2:34720873-34723703	1266	-	0.10275	0.105828	0.040578	0.194304	0	0	0	0.129912
AC155352.2_FG010	2:34740816-34741415	429	+	29.2762	0	32.2073	33.001	0.228627	56.3858	27.3898	0.320806
AC155376.2_FG002	8:164094581-164095366	786	+	0	0	0	0	0	0	0	0
AC155376.2_FG004	8:164135912-164138949	1667	+	11.7809	9.25863	15.057	8.94976	7.10336	4.8226	10.1834	6.06284
AC155376.2_FG005	8:164169975-164178451	2061	-	10.7461	8.39311	8.47194	21.3174	17.053	15.2389	9.08122	23.0868
AC155377.1_FG001	3:220883486-220901741	4590	-	15.9797	14.2826	11.0231	14.6207	15.3897	15.0568	16.3784	17.1305
AC155377.1_FG002	3:220979473-220985596	1900	-	10.5159	9.65932	5.8177	9.16407	7.79204	9.61102	6.71276	11.6622
AC155390.2_FG002	1:32667228-32669225	1998	-	0.198782	0.336876	0.0126099	0.105152	0.0222555	0.478315	0.890593	0.0750114
AC155434.2_FG001	7:173888418-173890521	1496	+	0.257614	0.780888	0.0597176	0.584339	0.269614	1.42562	0.270946	2.13771
AC155434.2_FG003	7:173885184-173885904	354	+	0	0	0	0	0	0	0	0
AC155434.2_FG004	7:173817567-173838675	6136	-	21.5849	23.4859	22.2787	20.1244	21.453	24.5365	27.781	18.2385
AC155434.2_FG006	7:173806883-173808319	1437	-	12.1031	9.82457	10.8151	21.7193	14.6552	19.3186	14.6661	22.2304	Dof
AC155496.2_FG009	5:4777199-4786635	2496	-	37.4975	20.7766	23.3203	25.5498	30.7599	32.2398	34.1484	35.6183
AC155610.2_FG007	3:175686403-175689182	1341	+	0.910973	1.77755	6.05901	1.39027	5.65123	1.56213	7.71094	0.909355
AC155610.2_FG009	3:175701338-175701538	201	+	1676.28	526.829	3644.68	2432.09	1195.82	1289.27	111.532	1075.06
AC155622.2_FG001	3:4441648-4449122	4395	-	41.7834	37.3169	39.911	37.7579	39.3692	46.7563	41.7884	41.66
AC155624.2_FG006	1:8264659-8289299	2276	+	29.6885	35.85	39.3111	27.2164	34.9689	26.2056	31.0411	28.3558
AC155624.2_FG011	1:8290076-8293499	1066	-	31.5559	37.7669	20.2785	35.9096	30.0928	29.4646	21.4887	42.5324
AC159612.1_FG007	5:4582263-4584511	2054	+	2.58134	1.7505	4.17871	2.58278	2.84551	2.61018	2.04974	1.29864
AC165171.2_FG002	3:144743920-144745323	1014	+	4.12525	0.557522	6.19661	2.38686	4.00974	1.86413	2.94032	0.854812	WRKY
AC165178.2_FG004	2:181422894-181424932	1811	-	2.70561	2.88834	1.85308	4.09429	0.9051	1.60256	2.22197	2.26596	MYB
AC166636.1_FG007	1:19971564-19973341	1653	-	2.48107	2.77151	4.25653	1.63118	2.71571	1.85831	2.58542	3.03107
AC166636.1_FG008	1:19980603-19983527	1047	+	8.77506	16.0415	18.5368	21.8418	16.066	19.0529	22.481	14.9204
AC166636.1_FG009	1:19985132-19990950	2085	-	0.173075	0.356251	0.364491	0.363723	0.290386	1.62684	0.347504	0.401329
AC177831.3_FG004	2:49116209-49119186	1455	-	0.0435295	0.53786	0.0687596	0.219523	0.358088	0	0	0.0550434
AC177833.2_FG001	2:110063478-110067338	750	-	0	0	0	0	0	0	0	0
AC177837.3_FG002	1:22598348-22599226	879	+	0	0	0	0	0	0	0	0
AC177838.2_FG015	1:161143-161925	783	+	3.02982	2.66352	0.554128	1.0348	0	0	0.153653	0.605954
AC177844.2_FG003	2:67908752-67909060	309	-	0	0	0	0	0	0	0	0
AC177850.2_FG003	1:18142214-18144233	843	+	0	0	0	0	0	0	0	0
AC177850.2_FG005	1:18199712-18202663	510	+	3.57489	1.25799	5.24413	3.71492	4.70467	8.65556	4.38107	3.04004
AC177860.4_FG002	2:173255605-173258490	1829	+	0.273422	0.451595	0	0	0	0.0837709	0	0
AC177890.3_FG005	1:282685996-282686490	495	+	0	0	0	0	0	0	0.15754	0.24478
AC177893.3_FG003	2:211005161-211005784	624	-	0	0	0	0	0	0	0	0
AC177893.3_FG006	2:210998897-210999592	696	-	2.13863	1.0455	0.800398	0.283661	1.84119	0.563952	0.545363	0.284343
AC177897.2_FG002	1:260133905-260138971	1797	+	3.3833	5.64176	6.59949	4.33322	6.19578	5.4577	6.15277	4.5393
AC177897.2_FG022	1:260052556-260054526	1749	+	0	0	0.0277792	0	0	0	0	0
AC177897.2_FG029	1:260029359-260029919	561	+	0	0	0	0	0	0	0	0
AC177899.2_FG009	1:300444330-300446450	2121	+	4.93124e-05	2.51937e-05	1.01076e-05	0.00975095	0.0534103	0.0769748	0.550577	0.21659
AC177899.2_FG012	1:300344676-300347154	1497	+	0	0	0	0	0	0	0	0
AC177900.4_FG001	1:91087789-91088151	363	+	0	0	0	0	0	0	0	0
AC177905.2_FG001	1:115705655-115705858	204	-	0	0	0	0	0	0	0	0
AC177905.2_FG003	1:115616900-115617412	513	+	1.64014	1.23652	0.864245	0.68849	0.987891	0.228157	0.591333	0.22992
AC177908.3_FG002	1:72799918-72805502	2634	-	12.2234	7.42035	13.1085	12.8755	14.3893	14.3799	16.3103	12.847
AC177908.3_FG003	1:72690304-72691035	732	+	0	0	0	0	0	0	0	0
AC177908.3_FG006	1:72739362-72740252	891	-	0	0	0	0.1008	0	0	0	0
AC177911.4_FG005	1:16790124-16790687	564	-	0	0	0	0	0	0	0	0
AC177920.3_FG008	2:52259830-52261750	597	+	0	0	0	0	0	0	0	0
AC177922.2_FG002	3:74801239-74801859	621	-	0	0	0	0	0	0	0	0
AC177924.2_FG001	2:70717256-70722062	828	-	1.14695	0.636865	0.139398	0.333578	1.04442	0.442114	0	0	bHLH
AC177924.2_FG003	2:70740295-70740630	336	+	0	4.26673	0	0	0	0	0.375112	0
AC177926.2_FG003	1:295596330-295596986	657	+	0	0	0	0	0	0	0	0
AC177930.2_FG001	2:108469184-108469705	522	-	0	0	0	0	0	0	0	0
AC177930.2_FG002	2:108459750-108460181	432	-	0	0	0	0	0	0	0	0
AC177936.6_FG008	1:285635885-285648684	2924	+	44.7233	40.6417	41.8036	52.0648	43.5078	52.7575	48.4074	52.4481
AC177941.3_FG001	1:35960130-35962613	2484	+	0	0	0	0	0	0	0.0190825	0
AC177941.3_FG006	1:35848136-35848949	732	+	0	0	0	0	0	0.131132	0	0
AC177946.2_FG004	1:19104324-19104800	477	+	11.589	7.73412	2.1199	2.59084	4.88484	7.24534	13.1585	13.083
AC177947.2_FG003	1:33355137-33355748	612	-	1.09215	0.282013	0	0	0	0	0.110415	0
AC182105.3_FG006	4:85705028-85706760	867	-	0	0	0	0	0	0.103897	0	0
AC182413.4_FG002	5:4210801-4214221	681	-	0	0	0	0	0	0	0	0
AC182439.4_FG004	3:46892903-46893382	330	-	0	0	0	0.599332	1.26531	0	0	0
AC182482.3_FG003	3:23005376-23012937	1880	+	1.22409	2.6687	7.23478	2.71442	3.22803	1.61952	3.51114	1.19128
AC182615.4_FG001	3:22046940-22047800	861	-	0	0	0	0	0	0	0	0
AC182617.3_FG001	3:127296562-127310329	1634	-	33.3334	17.8621	33.074	16.9678	33.4435	20.152	35.6687	32.3852
AC182627.2_FG003	3:58306613-58307062	450	-	0.463188	0.239966	0	0	0	0	0.376962	0
AC182831.3_FG004	3:194168275-194168862	588	+	0	0	0	0	0	0	0	0
AC182838.3_FG006	3:190509605-190510401	372	-	2.38208	4.6587	0	0	0	0	4.9589	3.90745
AC183315.4_FG006	3:28221287-28223015	870	+	0.495294	1.44686	0.912958	0.936374	0.451233	0.517096	1.39712	1.14749
AC183319.3_FG001	3:37159271-37160060	522	+	0.176854	0.548738	0	0	0.319711	0	0.717074	0
AC183372.4_FG006	3:141332902-141333714	813	-	0	0.0932788	0	0	0	0	0	0
AC183412.5_FG005	2:26850541-26854132	3168	+	0.310389	0.206629	0	0.138145	0.167242	0.068653	0.205151	0.207879
AC183413.3_FG006	5:112042342-112048514	753	-	0	0	0	0	0	0	0	0
AC183509.1_FG001	3:135565392-135566421	756	+	0.200041	0	0.158042	0	0	0	0	0
AC183514.3_FG006	3:168427403-168430627	687	-	4.01508	0.828809	0	0.144546	3.23113	2.73007	1.76033	3.04271
AC183817.2_FG002	5:86335132-86338776	843	+	0	0	0	0	0	0	0	0
AC183888.4_FG006	4:240239011-240242899	630	-	0	0	0	0	0	0	0	0
AC183888.4_FG008	4:240229973-240231598	1038	+	0	0	0	0	0	0	0	0
AC183914.3_FG004	4:178651212-178651709	498	-	0	0	0	0	0	0	0	0
AC183915.4_FG001	3:55958940-55962409	660	-	0.121714	0.125653	0	0	0	0	0	0
AC183927.3_FG004	3:64562577-64563601	768	+	0	0	0.927574	0.369898	0.178046	0	0.631462	0
AC183928.4_FG001	7:109608-111503	1824	+	0.0670638	0.0345158	0	0	0	0	0.0538774	0.0424083
AC183932.3_FG007	5:5575816-5578873	2240	+	15.3064	12.6047	4.34573	9.27485	7.83513	7.90895	6.15891	8.44034
AC183938.4_FG011	10:142839464-142842561	825	-	0	0.182862	0	0.111741	0	0.111074	0.0714852	0.112032
AC183944.4_FG003	9:80885109-80887658	1740	-	0	0	0	0	0	0	0	0
AC183950.2_FG002	8:163179500-163179916	417	+	0	0	0	0	0	0	0	0	C2H2
AC183950.2_FG003	8:163113316-163183032	1340	+	45.1368	28.3396	63.2053	38.666	45.6686	51.047	40.6592	36.4644
AC183950.2_FG004	8:163214353-163217215	2355	+	0.241551	0.0500872	0.0315495	0.151096	0.172013	0.0845676	0.18511	0.0947949
AC183950.2_FG005	8:163218231-163219697	1467	-	0.235797	1.35485	0.398667	0.000137433	0.440697	1.06714	0.707614	0.844999
AC183968.2_FG001	4:241402394-241404692	831	+	0	0.0905346	0.97101	1.21714	1.35915	0.65993	0.920168	1.33125
AC184112.4_FG010	3:155667382-155668201	675	-	0	0	0	0	0	0	0	0
AC184116.3_FG001	7:60253113-60253796	684	+	0.346362	0	0	0	0.104894	0	0.186498	0
AC184127.3_FG003	5:179793961-179794455	495	+	0	0	0	0	0	0	0	0
AC184130.4_FG005	4:235295762-235296655	894	-	0	0	0	0	0	0	0	0
AC184130.4_FG012	4:235215737-235229977	1535	-	4.37041	6.15532	12.1681	6.00795	9.60735	8.04441	7.27165	4.1326
AC184133.3_FG001	9:72608274-72610234	507	+	2.04382	3.28168	1.76436	0	1.68121	1.15549	1.35095	2.55925
AC184164.2_FG004	3:209309527-209310293	438	+	0.244191	0.253124	0	0	0	0.30559	0	0
AC184164.2_FG006	3:209331425-209331823	399	-	0	0	0.469199	0	0.265468	0.371076	0.242445	0
AC184169.3_FG001	4:26793760-26862120	3315	+	14.8067	17.7549	17.5404	18.2729	15.3136	13.1818	19.3881	21.8144
AC184170.4_FG002	3:133656226-133656873	648	-	0	0.129169	0.395412	0	0.227142	0.31338	0	0.157987
AC184171.4_FG002	4:206313390-206314046	657	+	0	0	0	0	0	0	0	0
AC184172.3_FG001	4:158407910-158408749	600	+	0	0	0	0	0	0	0	0
AC184699.3_FG005	3:220686421-220688722	2091	+	0.431302	0.503071	0.295201	0.362559	0.447345	0.504507	0.43876	0.181839
AC184764.3_FG003	4:212307047-212307898	642	+	0	0	0	0	0	0	0	0
AC184764.3_FG006	4:212215453-212216504	723	-	0	0	0	0	0	0	0	0
AC184765.4_FG005	3:213460474-213461593	1017	+	0	0	0	0	0	0	0	0
AC184771.4_FG003	4:60516987-60517820	399	+	0	0	0	0	0	0	0	0
AC184775.2_FG002	3:148801400-148802842	1389	+	0	0	0	0	0	0	0	0
AC184788.2_FG001	5:152985127-152985600	474	-	0	0.434732	0	0	0	0	0.511831	0
AC184789.4_FG002	5:128712338-128716680	825	+	0	0	0	0	0	0	0	0
AC184794.2_FG003	4:86442615-86444988	1875	+	0.162501	8.46355	5.41989	4.76238	2.55595	5.90606	7.00966	0.788688
AC184831.3_FG003	4:238475280-238476164	885	+	0	0.0831921	0	0	0	0	0.195117	0
AC184831.3_FG005	4:238485005-238485850	846	-	0	0	0	0	0	0	0	0	GATA
AC184831.3_FG008	4:238557057-238557902	846	-	0	0	0	0	0	0	0	0	GATA
AC184836.3_FG002	4:80087734-80088498	765	+	0	0	0	0	0	0	0	0
AC184857.2_FG006	5:15392020-15392748	729	-	0	0	0	0	0	0.263801	0.0849908	0.133017
AC184871.2_FG009	1:273673649-273675135	723	+	0	0	0	0	0	0	0	0
AC185108.3_FG006	7:162184234-162184620	237	+	0	0	0	0	0	0	0	0
AC185108.3_FG010	7:162309142-162309999	858	-	0.588667	0.0867082	0.3986	0.847913	0.229813	0.948198	0.203348	0.106269
AC185108.3_FG011	7:162313242-162313838	597	+	0	0	0	0	0	0	0	0	C2H2
AC185122.3_FG009	4:19466878-19467558	681	+	0	0	0	0	0	0	0	0
AC185126.3_FG006	4:188055422-188055925	504	+	0	0	0	0	0	0	0	0
AC185130.2_FG004	5:76093449-76098413	1066	-	4.38034	5.01135	1.50434	1.44044	1.33235	1.35224	4.08801	3.4507
AC185130.2_FG005	5:76074654-76077533	504	-	0	0	0	0	0	0	0	0
AC185217.3_FG004	4:190256505-190257669	780	+	0	0	0	0	0	0	0	0
AC185217.3_FG007	4:190268979-190270115	774	+	0.483931	0.89852	0.0764642	0.487885	0.704567	0.727465	0.234229	0.366841
AC185226.4_FG001	4:162576953-162599946	4760	-	24.2024	23.3725	24.4004	22.6987	33.7947	31.8942	32.0771	34.1136
AC185252.4_FG002	3:113342894-113343557	564	-	0	0	0	0	0	0	0	0
AC185254.4_FG002	4:74311699-74322990	3137	+	1.06176	0.815156	1.10473	0.831095	0.82121	1.50699	0.910785	1.20128
AC185256.3_FG002	5:114484537-114485567	948	-	0	0	0	0	0	0	0	0
AC185256.3_FG003	5:114588561-114595381	2394	+	0	0	0	0	0	0	0	0
AC185261.4_FG002	5:60207782-60208246	465	-	0	0	0	0	0	0	0	0
AC185265.3_FG003	5:115996865-115999094	1350	+	0	0	0	0	0	0	0	0
AC185276.2_FG004	3:228582691-228583317	627	+	0	0	0	0	0	0	0	0
AC185276.2_FG006	3:228494917-228496843	249	+	0	0	0	0	0	0	0	0
AC185281.5_FG006	5:90817357-90819053	624	+	0	0	0	0	0	0	0	0
AC185300.4_FG002	4:228011331-228012407	1077	-	1.23917	1.47862	1.81111	1.51341	2.37997	2.61417	0.753601	1.95639
AC185305.3_FG003	4:52459054-52459293	240	-	0	2.45697	1.80876	0	1.77534	0	0	0
AC185415.3_FG005	2:197683480-197691313	1613	-	3.70598	4.28009	3.87745	3.62347	3.09276	4.27819	4.97215	3.11264
AC185422.3_FG005	4:149157981-149162014	1205	+	0.197765	0.112463	0.732446	0	0.357835	0.12742	0.319671	0.513403
AC185427.5_FG004	5:139107771-139108250	480	-	0.615413	1.91129	0.162161	1.29143	0.554956	0.256786	0.16666	0.258715
AC185443.3_FG004	4:221317508-221320563	1974	-	0	0	0	0	0	0	0	0
AC185460.3_FG004	5:183645861-183646790	930	+	0	0.0779256	0	0	0	0	0	0
AC185466.3_FG001	4:181668842-181670224	606	+	2.21803	2.86387	1.09545	3.31814	3.51968	3.29856	3.36404	2.62534
AC185471.3_FG005	4:166914847-166921513	468	+	0.859841	0.222607	0.849672	0.270631	0.193684	0	0.69901	0.813177
AC185473.3_FG005	4:156782042-156782383	342	-	0	0	0	0	0	0	0	0
AC185475.3_FG001	4:168857087-168858825	621	+	0.533901	0.413546	0.210941	1.5134	0.605553	0	0.323793	0.674329
AC185478.4_FG005	4:181401680-181402444	765	-	0	0	0	0	0	0	0.0793677	0
AC185478.4_FG007	4:181518222-181518716	495	+	0	0	0	0	0	0	0	0
AC185487.4_FG001	5:195603986-195604390	405	+	0	0	0	0	0	0	0	0
AC185500.3_FG001	3:180898313-180899211	564	-	0.155424	0	0.122829	0	0	0	0.377581	0
AC185501.3_FG001	4:177342178-177342687	510	+	0	0	0	0.231846	0	0	0.149367	0.23227
AC185501.3_FG006	4:177370079-177370931	420	+	0	0	0.21025	0	1.1928	0.998065	0.216877	0.334994
AC185504.4_FG002	4:163996575-163997129	555	-	0	0.329878	0	0	0	0	0	0
AC185522.2_FG002	4:115462297-115462746	450	-	0	0	0	0	0	0	0	0
AC185530.2_FG004	4:120658676-120660231	879	-	0	0	0	0	0	0	0	0
AC185586.4_FG003	4:80920457-80920822	366	-	0	0	0	0	0	0	0	0
AC185587.3_FG003	1:203093192-203094775	714	-	0	0	0	0	0	0	0	0
AC185588.2_FG002	1:297181343-297185602	684	-	0	0.119165	0	0	0	0	0	0.145821
AC185593.3_FG003	1:85774941-85775324	384	-	0	0.336047	0.511512	0	0.866193	0.404406	1.32369	2.03497
AC185605.3_FG003	5:44413909-44414361	453	-	0	0	0	0	0	0	0	0
AC185610.3_FG001	1:251503583-251503918	336	-	0.908302	0	1.07848	0.569322	0.802462	0	0.375112	0.570463
AC185611.3_FG001	1:206794909-206795232	324	+	0	0	0	0	3.11169	0	0.418755	0
AC185623.4_FG010	4:157627349-157627609	261	-	0	0	1.96037	3.04091	1.02507	0	0	0
AC185623.4_FG012	4:157645342-157646896	891	-	0	0	0	0	0	0	0	0
AC185628.3_FG010	5:7207097-7209188	771	+	0	0	0.999423	5.64106	0	0	0	1.35236
AC185642.4_FG001	4:164731972-164732298	327	+	0	0	0	0	0	0	0	0
AC185648.3_FG007	4:174540175-174542764	1341	+	0	0	0	0	0	0	0	0
AC185649.2_FG003	4:164504267-164504605	339	-	0	0	0	0	0	0	0	0
AC185655.3_FG004	2:39291421-39292839	1419	-	0	0	0	0	0	0	0	0	C2H2
AC185655.3_FG005	2:39314238-39315755	1518	-	0	0	0.0327141	0.0522233	0	0	0.0332937	0.052379	C2H2
AC185656.3_FG002	5:65712432-65712809	378	+	0	0	0	0	0	0	0	0
AC185660.3_FG003	4:164925556-164925894	339	-	0	0	0	0	0	0	0	0
AC186009.3_FG001	1:29697501-29698458	882	-	0	0	0	0	0	0	0	0
AC186013.3_FG001	7:59327473-59328192	720	+	0.214369	0.2212	0.084684	0.135064	0.0974481	0	0.173047	0.676974
AC186145.3_FG002	4:59678350-59679108	759	-	3.98388e-06	0	0.157154	0.125336	0.0904897	0	0.282675	0
AC186147.3_FG008	4:162908356-162909690	1335	-	27.861	19.0119	22.0228	15.388	23.6019	13.6141	20.627	30.6678
AC186156.3_FG004	4:172821941-172822552	612	+	0	0	0	0	0	0	0	0
AC186156.3_FG005	4:172794270-172794881	612	+	0	0.564026	0	0	0	0.170971	0	0
AC186164.3_FG001	4:226722159-226722662	504	+	1.31572	3.11014	2.52566	2.60361	3.90397	3.76499	2.74379	1.89694
AC186166.3_FG008	5:1818155-1820634	2187	+	0.225646	1.26916	0.614062	0.770851	1.80046	1.87004	0.158827	0.0743021
AC186189.3_FG004	1:283384244-283386967	693	+	10.6473	7.36483	4.7432	5.28079	5.2493	4.39817	13.1719	10.3008
AC186189.3_FG005	1:283387227-283387916	690	+	0	0	0	0	0	0	0	0
AC186195.4_FG001	2:13087811-13089756	1794	-	0.10251	0.0351733	0	0.0861675	0	0	0.0274524	0
AC186231.4_FG002	1:202624720-202625559	840	+	0.173053	0.981444	7.04055	0	0.157606	0.108399	1.18581	0.109336
AC186233.3_FG007	1:10193318-10195985	2424	+	0	0	0.0578414	0.0923569	0	0	0	0
AC186283.4_FG002	1:108657660-108658169	510	-	0	0	0	0	0	0	0	0
AC186284.3_FG007	1:150686756-150688696	1659	+	0	0	0	0	0	0.0468322	0	0
AC186287.7_FG005	4:173995206-173996678	1473	-	0.0429055	0.132535	0.0338868	0.0540943	0.117658	0.161303	0	0
AC186309.3_FG002	5:38325635-38326853	1101	-	0	0	0	0	0	0	0	0
AC186309.3_FG006	5:38388468-38389163	696	+	0	0	0	0	0	0	0	0
AC186310.4_FG004	4:230614068-230616202	1977	-	0.0306163	0	0	0	0.0280148	0	0.0245917	0.0387227
AC186322.4_FG003	1:211458482-211459643	747	+	0	0	0	0.128184	0	0	0	0
AC186322.4_FG005	1:211473240-211474205	966	-	0	0	0	0	0	0	0	0
AC186329.3_FG006	2:49318394-49318968	453	+	0.228645	0	0	0	0	0	0.186045	0.576502
AC186337.3_FG003	2:24633243-24633719	477	-	0	0	0	0	0	0	0	0
AC186375.3_FG001	6:111760558-111761351	717	+	0	0	0	0	0	0	0	0
AC186404.3_FG002	8:69168902-69169751	504	-	0	0	0	0	0	0	0	0
AC186406.4_FG006	6:14951256-14953843	2073	-	0	0	0	0	0	0	0	0
AC186408.5_FG005	4:184247328-184248107	780	-	0	0	0	0	0	0	0	0
AC186412.4_FG011	1:275024552-275025456	744	-	0	0	0	0	0	0	0	0
AC186417.3_FG004	1:13072885-13074762	609	-	0	0.142092	0	0	0.124751	0	0	0
AC186417.3_FG006	1:13087620-13088273	654	+	0	0	0	0	0	0	0	0.15582
AC186424.4_FG009	1:279654192-279654614	423	-	0	0	0	0	0	0	0	0
AC186431.5_FG001	8:61953310-62000059	639	-	0.255553	0	0.100965	0	0.115969	0	0	0.161352
AC186433.4_FG001	6:86277617-86278228	612	+	2.04779	0.564026	0.107878	0	0.123814	0	0.552073	0.517102
AC186493.4_FG002	7:154258241-154260097	1857	+	0.361427	0.202925	0.0778472	0.0828606	0.150297	0.329424	0.0791908	0.249331
AC186500.3_FG001	5:122034476-122035165	690	-	0	0	0	0	0.414299	0	0.0920563	0.143973
AC186506.3_FG001	1:160126927-160127591	417	+	0.26988	0.279993	0	0.339597	0	0	0	0
AC186512.3_FG007	4:163676001-163676579	579	+	0.00505226	0.000632569	0	0	0	0.186558	0.275022	0.00293103
AC186519.4_FG002	1:258673893-258674273	381	+	0	0	0	0	0	0	0	0
AC186524.3_FG005	1:180959298-180961804	597	-	0	0	0	0	0	0	0	0
AC186524.3_FG006	1:180963014-180963490	477	+	0	0	0	0.261265	0	0	0	0
AC186563.4_FG004	4:176811696-176811977	282	+	0	0	0	0	0	0	0	0
AC186577.3_FG006	6:1996014-1996736	723	-	0.213097	0.439765	0.67345	0	1.1625	0	0.602044	0
AC186579.3_FG007	8:159032278-159033277	759	-	0	0	0	0	0	0	0	0
AC186581.3_FG003	7:40973158-40974020	549	+	0	0	0	0	0	0	0	0
AC186583.3_FG004	6:61952500-61954179	771	+	0	0	0	0	0	0	0	0
AC186585.4_FG002	6:15264372-15265949	710	+	2.70977	2.09906	2.46245	1.02492	2.3349	2.2022	3.17765	0.342134
AC186590.3_FG005	6:93371593-93372311	450	+	0	0	0	0	0	0	0	0
AC186590.3_FG006	6:93379182-93379900	450	+	0	0	0	0	0	0	0	0
AC186592.3_FG002	6:74909302-74911917	2616	+	0.04492	0.0693316	0.0709478	0.0566436	0.0411315	0.1126	0.144247	0.255696
AC186592.3_FG003	6:74918766-74919260	495	+	0.194054	0	0	0	0	0	0	0
AC186602.4_FG003	1:99663463-99664502	576	+	0	0	0	0	0	0.188117	0	0
AC186603.6_FG003	1:168693316-168694764	1449	-	0.568641	2.3421	1.03642	2.42651	0.639691	1.42519	1.12526	0.553114
AC186606.4_FG003	1:182626789-182627397	609	-	0.27513	0.142092	0.108705	0.346605	0.374253	0	0.111268	0	bZIP
AC186611.4_FG005	8:112706821-112708821	687	-	0	0	0	0	0	0	0	0
AC186613.4_FG003	2:36039757-36040371	615	-	0	0	0	0	0	0	0	0
AC186619.3_FG001	1:207334378-207335651	966	+	0	0	0	0	0	0	0	0
AC186647.3_FG001	6:110030367-110030822	456	+	0	0	0	0	0	0	0	0
AC186653.4_FG005	1:23342660-23343165	336	+	0	0	0	0	0	0	0	0
AC186656.4_FG004	1:288643944-288644270	327	+	0	0	0	0	0	0	0	0
AC186656.4_FG012	1:288758802-288760579	1077	+	0	0	0.148508	0.158002	0	0	0	0
AC186663.3_FG006	3:140618643-140619413	681	+	0	0	0	0	0.105566	0	0	0
AC186667.3_FG007	1:275701415-275702484	924	+	0	0	0	0	0	0	0	0
AC186669.3_FG002	3:203481950-203483929	1980	+	0.0306012	0.125832	0	0.0386342	0.0839026	0.114937	0.122764	0.154627
AC186684.4_FG001	1:267792675-267796162	606	-	1.24764	1.00236	0.219089	0.698556	1.25703	0.694434	1.12135	0.70009
AC186691.4_FG006	1:189367641-189367829	189	+	0	0	0	0	0	0	0	0
AC186743.4_FG003	4:185718494-185718829	336	-	0.000916723	0	1.07848	0	0.000435809	0	0	0
AC186781.4_FG006	7:139424719-139427275	711	+	0	0	0.086229	0	0.198417	0.136707	0.0881121	0
AC186782.4_FG003	7:90748646-90777493	1203	+	0	0.0563023	0	0	0.199654	0.136982	0	0
AC186785.4_FG002	7:110439192-110441558	516	-	0	0	0	0	0.163019	0	0	0
AC186789.4_FG001	8:146744700-146744974	219	+	0	0	0	0	0	0	0	0
AC186800.3_FG005	7:138373627-138374157	531	+	0	0	0	0	0	0	0	0
AC186807.4_FG002	8:74702933-74703271	339	+	0	0	0.350605	0	0.391693	0	0.365586	0
AC186815.3_FG003	8:145401332-145404933	948	+	0.221208	0.228003	0.17474	0	0	0	0	0.0931938
AC186828.3_FG001	6:77262093-77262521	429	+	0	0	0	0	0	0	0	0
AC186845.4_FG009	7:163756211-163756528	318	-	3.74764	1.45138	0.848004	2.67987	0.470072	0	7.11396	9.42265
AC186897.4_FG016	8:13175774-13176205	432	-	0.251017	1.04104	0.198478	0	0	0.314119	0.20455	0
AC186902.4_FG006	1:279917535-279918363	792	-	0	0	0	0	0	0	0	0
AC186902.4_FG009	1:279859354-279859968	615	-	0	0	0	0	0	0	0	0
AC186904.4_FG007	2:15114411-15114992	474	-	0	0	0	0	0	0	0	0
AC186905.3_FG013	1:234700274-234700615	342	+	0	0	0	0	0	0	0	0
AC187037.4_FG008	8:147713492-147714098	378	-	0.670816	1.39496	0.265327	0.421548	0	0.419476	0	0.422114
AC187046.3_FG009	7:162096143-162097954	1191	+	0	0	0	0	0	0	0	0
AC187056.3_FG002	6:71581277-71582874	1329	-	0	0	0	0	0	0	0	0
AC187065.3_FG003	8:32334482-32335006	525	-	0	0.181118	0.138417	0	0	0	0	0
AC187067.4_FG001	7:175728052-175728507	456	-	0	0	0	0	0	0	0	0
AC187072.4_FG001	7:164602083-164602934	645	+	0	0	0	0	0	0	0	0
AC187072.4_FG002	7:164607111-164608106	996	+	0	0	0	0	0	0	0	0
AC187080.3_FG006	6:91137863-91140765	2790	+	0.0418823	0	0	0.0528132	0.0191805	0.0524926	0.0168098	0.0264897
AC187080.3_FG007	6:91126380-91128404	2025	+	0.0596073	0.0920253	0.023537	0.0375793	0.109096	0	0.0718124	0.15078
AC187082.3_FG003	7:38933904-38936698	870	+	0	0	0	0	0	0	0	0
AC187086.3_FG004	8:136786043-136788220	903	-	0	0	0	0	0	0	0	0
AC187088.3_FG002	6:9257833-9258622	381	-	0	0	0	0	0	0	0	0
AC187090.3_FG003	8:9480068-9480476	375	-	0	0	0	0	0	0	0	0
AC187090.3_FG011	8:9379432-9379998	567	-	0	0	0.487098	0	0.697724	0.192954	0	0
AC187092.6_FG003	8:70564699-70565112	414	+	0.821993	5.40179	0.216675	2.4133	0	2.74257	0	1.72586
AC187096.5_FG001	8:20922672-20927879	744	-	0	0	0	0	0	0	0	0
AC187098.4_FG011	7:174836643-174838301	1659	-	0.000208651	0	0	0	0	0	0	0
AC187099.5_FG005	8:120576304-120578729	537	+	0	0	0.26656	0	0.152547	0	0	0.212703
AC187142.3_FG007	6:123771371-123771646	276	-	0	0	0	2.2802	0	0	0	0
AC187157.4_FG001	8:22685341-22686442	876	-	0	0.084332	0	0.103094	0	0	0.0659202	0	ERF
AC187157.4_FG002	8:22678477-22681883	969	+	15.1953	11.8196	15.2304	12.9194	12.549	14.638	15.1241	14.7667
AC187157.4_FG005	8:22640767-22645283	2656	-	0.296799	1.34115	1.68213	1.90716	0.935822	0.841972	0.486065	0.363285	HD-ZIP
AC187160.3_FG003	7:130778557-130779995	477	+	0	0	0	0	0	0	0	0
AC187207.3_FG006	1:13368622-13370295	1674	-	0	0.190373	0.0292098	0.0932641	0.135297	0.1854	0.0594389	0.0935455
AC187209.5_FG003	2:4655998-4657613	1110	-	0	0	0.047672	0	0	0	0.0485714	0.0762969
AC187209.5_FG010	2:4702820-4703488	669	+	0	0	0	0	0	0	0	0
AC187212.3_FG011	2:9556848-9559571	777	-	0	0	0	0	0	0	0	0
AC187217.4_FG004	1:221441399-221441509	111	+	0	0	0	0	0	0	0	0
AC187222.4_FG001	3:139283031-139286078	902	+	7.84017	4.491	10.458	3.97009	10.2019	6.22063	7.352	11.1475
AC187235.3_FG003	8:81740371-81741114	744	+	0	0	0	0	0	0	0	0
AC187241.4_FG009	8:148330109-148330670	420	+	0	0	0	0	0	0	0	0
AC187243.3_FG005	8:123614699-123615250	552	+	0.804991	3.49494	0.508952	0.405569	0.874298	0	0.260843	2.03193
AC187262.4_FG007	1:184699439-184700602	935	-	106.82	24.8772	234.071	214.963	66.8625	57.4686	162.956	90.1923
AC187263.4_FG001	8:24766490-24767041	552	-	7.83539	4.32794	2.42029	8.21908	3.64859	4.55502	1.76003	5.79195
AC187279.3_FG003	6:48607338-48607664	327	+	2.94858	3.59546	0.778163	1.84667	1.29855	3.06955	2.0346	2.46768
AC187279.3_FG004	6:48571557-48572027	471	-	0	0	0	0	0.191434	0.265885	0	0
AC187283.3_FG005	6:85608192-85608440	249	+	0	1.81795	5.36442	2.05991	0	0	4.51135	0
AC187393.3_FG001	8:13664900-13665927	714	+	0.759357	1.11941	0.257123	0.683471	0.0986147	1.4947	0.788184	0.137028
AC187404.3_FG003	10:60770380-60772717	1176	+	0	0	0	0	0	0	0.0452151	0
AC187404.3_FG006	10:60747681-60748395	471	+	0	0	0	0	0	0	0	0
AC187460.4_FG002	7:86278491-86278862	372	+	0	0	0	0	0	0	0	0
AC187469.3_FG005	9:140505014-140505748	735	+	0	0	0	0	0	0	0	0
AC187485.3_FG001	8:67737908-67739327	471	-	0	0	0	0	0	0	0.172657	0
AC187551.3_FG002	8:94438246-94440159	1914	-	0	1.38865	1.06457	0	0	0.748606	1.29713	0
AC187560.5_FG003	7:5526967-5527296	330	-	0	0.499738	0	0	0	0	0	0
AC187567.4_FG004	6:131465405-131465851	447	-	1.1731	0.729376	0.371085	1.77236	1.05527	1.46816	0.763926	1.77452
AC187782.4_FG009	8:140488236-140488604	204	+	0	0	0	0	0	0	0	0
AC187789.3_FG001	9:30446554-30446811	258	+	0	0	0	0	0	0	0	0
AC187800.4_FG003	1:65642559-65642846	288	-	4.57618	4.02234	2.41885	2.84914	0	0	0	2.85986
AC187802.3_FG008	6:157777255-157778533	840	+	0	0	0	0	0	0	0	0
AC187809.3_FG005	9:43112054-43113808	1137	+	0	0	0.138816	0	0	0	0.0471399	0
AC187813.3_FG002	5:186824226-186824627	402	-	0	0	0	0	0	0	0	0
AC187818.3_FG004	8:1355031-1355447	417	-	0	0	0	0	0	0	0	0
AC187826.3_FG007	8:125522018-125523396	876	+	0	0	0	0	0	0	0	0
AC187843.3_FG001	10:7368378-7370449	1107	-	0	0	0	0	0	0	0	0
AC187843.3_FG006	10:7440080-7440550	471	+	0.212417	0.43991	0	0.534871	0.191434	0.531771	0	0.267864
AC187843.3_FG010	10:7347403-7348533	1131	-	0	0	0	0	0	0	0	0
AC187870.3_FG002	8:44989007-44990669	696	-	0	0	0	0	0	0	0	0
AC187872.3_FG005	7:161216563-161216937	375	-	0	0	0	0	0	0	0.280198	0.860206
AC187879.3_FG001	4:96056464-96057189	726	-	0.10592	0	0.0836845	0.133472	0.288926	0.132678	0.341982	0.1338
AC187885.3_FG002	6:119945171-119945642	432	+	0	0	0	0	0	0	0	0
AC187887.3_FG008	6:132232504-132233084	471	-	0	0.219955	0	0	0	0	0	0
AC187891.3_FG006	10:6401971-6402762	792	-	0.65628	0.966984	1.48135	1.18153	1.28001	0.82214	0.907387	1.30301
AC187895.2_FG001	7:102463678-102464421	744	+	0	0.105542	0	0.128914	0	0	0	0.129235
AC187895.2_FG002	7:102467394-102467975	582	+	0	0	0	0	0	0	0	0
AC187896.3_FG006	6:158622715-158622999	285	+	0	0	0.631639	0	0	0	0	0
AC187899.3_FG002	10:79677445-79678051	480	+	0	0	0.162161	0	0	0	0	0
AC187901.4_FG004	9:28979306-28979803	498	-	0	0	0	0	0	0	0	0
AC187903.3_FG004	10:132137762-132138079	318	+	0	0	0	0	0	0.668591	0	0
AC187910.5_FG002	8:149795716-149797892	501	+	0	0.786168	0	0	0	0	0	0
AC188000.3_FG003	10:91778426-91779253	828	-	0.0882269	0	0	0	0	0	0.142264	0.111482
AC188001.3_FG009	8:169908908-169911669	660	-	0	0	0	0	0	0	0	0
AC188003.3_FG012	4:1078563-1079020	366	+	6.16229	5.28132	43.8322	0.455317	28.3939	6.79882	34.9985	0.455995
AC188023.3_FG005	6:165316824-165317565	462	+	23.7851	24.8637	29.5983	29.3892	25.3886	9.92351	11.8207	23.3254
AC188023.3_FG011	6:165358085-165359290	687	+	0	0	0	0	0	0	0	0
AC188036.3_FG003	10:82151668-82152585	801	+	0	0	0	0	0	0	0	0
AC188128.3_FG002	10:144189184-144189881	552	-	0	0	0	0	0	0	0	0
AC188134.2_FG011	5:211701636-211703692	723	+	0	0	0	0	0	0	0	0
AC188195.2_FG003	10:96514787-96515050	264	+	0	0	0	0	0	0	0	0
AC188195.2_FG004	10:96530989-96531252	264	+	0	0	0	0	0	0	0	0
AC188195.2_FG005	10:96519911-96520174	264	-	0	0	0	0	0	0	0	0
AC188296.3_FG004	6:125089480-125089929	450	+	0	0.239966	0	0	0	0	0	0
AC188582.3_FG002	9:81959103-81959708	606	-	0	0	0	0	0	0	0	0
AC188583.4_FG003	9:10528779-10529359	549	-	0	0	0.25678	0	0	0	0.131614	0
AC188612.3_FG009	10:4719251-4720141	777	-	0	0	0.076054	0	0	0	0	0
AC188710.4_FG006	6:129138400-129144473	4959	+	0	0.023373	0.0717757	0.042985	0.0312397	0.085447	0.0820314	0.0143745
AC188718.3_FG005	7:125582530-125584552	1500	+	0	0	0	0	0	0	0	0
AC188718.3_FG011	7:125624361-125625459	912	+	0	0	0	0	0	0	0	0
AC188718.3_FG015	7:125534861-125537068	1077	-	0	0	0	0	0	0	0	0
AC188721.3_FG001	7:142646103-142647449	831	+	0	0	0.0693579	0	0	0	0	0
AC188722.3_FG002	10:34730619-34730912	294	-	0	0	0	0	0	0	0	0
AC188723.3_FG001	8:87419443-87420366	756	+	0.100021	0	0	0	0.0909895	0	0	0.12636
AC188724.3_FG006	8:74126851-74127738	888	-	0	0	0	0.101251	0.292802	0.100645	0	0
AC188727.3_FG003	9:6371446-6374213	1905	+	0	0	0	0	0	0	0	0
AC188735.3_FG001	10:88509601-88510302	702	+	0	0	0	0	0	0	0	0
AC188744.3_FG009	9:59857475-59858182	708	+	0	0	0	0	0	0	0	0
AC188745.3_FG001	10:97146951-97147975	702	+	0	0	0	0	0.101034	0.139244	0	0
AC188752.3_FG008	4:218770775-218772712	1881	-	0	0	0.102299	0.0817566	0.0592541	0.0812338	0	0.040956
AC188753.3_FG004	3:159543987-159545784	777	+	0	0	0	0	0	0	0	0
AC188755.3_FG001	6:64315368-64316090	723	-	0	0	0	0	0	0	0	0
AC188756.2_FG004	9:38409974-38411526	1005	+	0.1368	0.0704883	0	0	0.0623892	0.257104	0	0.0864569
AC188757.4_FG004	9:121598646-121599446	801	-	0	0.0952027	0	0	0	0	0	0
AC188831.3_FG005	2:9495924-9496382	459	-	1.11484	3.00249	1.05763	4.2104	0.602297	0.837212	1.2695	0.843357
AC188838.3_FG005	6:150658552-150660183	1632	+	4.34147	4.54794	5.53421	4.41748	5.78099	5.15439	5.23329	5.05686
AC188964.3_FG002	4:92567589-92569707	1272	-	0	0	0	0	0	0	0	0
AC188978.3_FG008	6:168157850-168158805	498	+	0	0	0	0	0	0	0	0
AC189044.2_FG005	3:206195921-206196055	135	-	0	0	0	0	0	0	0	0
AC189048.2_FG001	6:23959756-23961260	1410	+	0	0	0	0	0	0	0	0
AC189052.3_FG003	1:177838089-177841167	1278	-	0	0	0	0	0	0	0	0
AC189056.3_FG001	10:46707940-46708428	489	+	0	0	0	0	0	0	0	0
AC189060.4_FG007	3:227101057-227103173	723	+	0	0	0	0	0	0	0	0
AC189078.3_FG004	7:65913552-65914034	483	-	0	0	0	0	0	0	0	0
AC189084.3_FG002	9:124792643-124793134	492	-	0	0	0	0	0	0	0	0
AC189280.3_FG001	4:171842284-171845974	639	+	0.76666	3723.96	0	0	0	0	10327.6	671.455
AC189694.3_FG003	4:118279637-118280471	630	+	0	0	0	0	0	0	0	0
AC189750.4_FG004	7:152351424-152354834	2107	-	12.7926	26.2314	13.2465	23.1294	32.9128	39.6029	14.7684	28.1628
AC189752.3_FG003	4:209094337-209094840	504	+	0	0	0	0	0	0	0	0
AC189753.3_FG002	9:133000512-133005724	1131	-	0	0	0	0	0	0	0	0
AC189770.3_FG002	9:120688525-120693683	1059	-	0	0	0	0	0	0	0	0
AC189771.3_FG001	5:73295006-73295440	435	-	0	0	0.391476	0	0.667359	0	0	0
AC189792.3_FG005	8:77229637-77230242	606	-	0	0	0.109545	0.174639	0	0	0	0.175023
AC189795.3_FG001	10:144935726-144936253	528	+	0.346876	0.358718	0.274157	0	0.156812	0.434304	0.281226	0.437697
AC189796.3_FG004	10:31189417-31192755	759	+	0	0	0	0	0	0	0	0
AC189879.3_FG003	9:86401833-86408268	3516	+	0.656823	2.81258	2.30937	2.54646	1.62686	1.60036	1.03616	0.609398
AC189883.3_FG002	10:58117312-58118221	531	+	0	0	0	0	0	0	0	0
AC190035.1_FG005	2:177403974-177406209	594	+	0	0	0	0	0	0	0	0
AC190225.2_FG001	8:61329298-61331048	666	+	0	0	0	0	0	0	0	0
AC190480.1_FG007	2:230916694-230918286	1593	-	0	0	0	0	0	0	0	0
AC190485.1_FG004	4:95542687-95543310	624	-	0	0	0	0	0	0	0	0
AC190491.1_FG002	3:11972848-11974072	354	+	0	0	0	0	0	0	0	0
AC190496.1_FG002	1:268938531-268938935	405	+	0	0	0	0	0	0	0	0
AC190498.1_FG007	1:262512352-262512974	336	-	0	0	0	0	0	0	0	0
AC190507.1_FG007	2:87766012-87766815	486	-	0.200556	0	0	0	0	0	0	0
AC190526.3_FG004	5:156197707-156201103	1607	-	0	0	0.71863	0.439917	0.496296	0.0485842	0.031156	0.392212
AC190544.2_FG004	2:219912429-219912647	219	-	0	0	24.9914	22.0775	13.0149	0	12.5132	14.4189
AC190549.3_FG004	3:7179594-7180016	423	+	0	0	0	0	0	0	0	0
AC190560.2_FG002	3:189972727-189974162	375	-	0	0	0	0	2.43803	1.70976	1.68119	0.860206
AC190565.2_FG003	9:61848739-61851070	723	+	0	0	0	0	0	0	0	0
AC190570.3_FG003	1:230766944-230768623	762	-	0	0	0	0	0	0	0	0
AC190572.4_FG001	3:119675050-119676586	744	+	0	0	0	0	0	0	0	0
AC190576.2_FG002	5:92282137-92282586	450	+	0	0	0	0	0	0	0	0
AC190587.3_FG005	9:114030535-114033244	2532	-	0.0232751	0.0959613	0	0.0293807	0.0639386	0.0584025	0.112117	0
AC190589.2_FG002	3:138546684-138547370	687	+	1.14716	0	0	0	0	0	0	0
AC190590.3_FG001	10:53192309-53192833	525	-	0.350258	0.362237	0.41525	0.661671	0.158319	0	0.284	0.441953
AC190609.3_FG001	4:194283465-194286652	1215	-	0.0540016	0	0.255918	0.204233	0.246579	0.0676676	0.0434413	0.0682737	bZIP
AC190609.3_FG002	4:194340274-194342652	545	-	4964.43	1010.89	3229.94	1345.66	2033.43	1698.87	2145.68	2170.18
AC190609.3_FG003	4:194340198-194344253	3278	+	21.2705	21.5875	21.525	17.3104	12.7674	16.0399	14.2783	29.4309
AC190609.3_FG004	4:194405480-194411146	2126	-	5.25162	6.02813	5.47099	3.82554	4.25405	4.42364	2.66329	3.72029
AC190609.3_FG005	4:194316920-194317327	408	+	0	0	0	0	0	0	0	0
AC190613.3_FG001	2:76215310-76218216	2847	+	0.122922	0.105395	0	0	0	0	0.148003	0.0518314
AC190614.3_FG004	5:16695723-16696214	492	+	0	0	0	0	0	0	0	0
AC190623.3_FG001	3:192033467-192033931	384	+	10.9932	8.40116	10.2302	8.12947	28.0069	21.0291	8.73637	15.0587
AC190623.3_FG002	3:192039428-192042682	2337	-	0	0	0	0	0	0	0	0
AC190628.4_FG007	4:181772400-181790742	4005	-	30.7354	29.0775	37.7738	29.2137	42.5899	34.3054	30.6955	30.7365
AC190630.2_FG001	10:18008298-18010681	504	+	0.187961	0	0.297137	0	0.509213	0	0	0
AC190632.2_FG004	4:151505627-151509053	645	+	0	0	0	0	0	0	0	0
AC190634.1_FG005	2:164435963-164437081	471	-	0	0	0	0	0	0	0	0
AC190636.3_FG005	5:813734-814828	1095	-	2.20987	4.93311	5.57602	2.70835	4.08976	8.0762	4.19941	3.80238
AC190638.3_FG001	4:164797112-164797450	339	-	0	0	0	0	0	0	0	0
AC190643.4_FG011	5:212209897-212210459	468	-	0	0	0	0	0	0	0	0
AC190652.3_FG001	3:50084980-50089432	762	-	0	0.204085	0	0.124657	0.0899954	0.247828	0.0798077	0
AC190665.3_FG006	3:52819390-52819959	570	+	0	0	0	0	0	0	0	0
AC190671.4_FG003	2:218626712-218627074	321	-	0	0	0	0	0	0	0	0
AC190677.3_FG003	2:104040064-104040735	615	-	0	0	0	0	0	0	0	0
AC190685.3_FG005	2:10349173-10350051	879	+	0	0	0	0	0	0	0	0
AC190688.3_FG006	8:170130928-170136676	1512	+	0.083226	0	0.0657315	0.10493	0	0	0	0
AC190693.1_FG009	2:207081246-207081686	441	+	0	0	0.190479	0.606484	0	0	0	0
AC190695.3_FG003	1:77024923-77027766	1767	+	0	0	0	0	0	0	0	0
AC190701.3_FG001	3:44554598-44560478	1419	-	0	0	0	0	0	0.0561831	0	0
AC190716.3_FG001	5:8833763-8836395	786	-	0	0.097722	0	0.119399	0.0862271	0.118688	0.0764184	0
AC190734.2_FG003	5:11847304-11848383	1080	-	0	0	0	0	0	0	0	0	TCP
AC190740.2_FG004	1:66781535-66787044	915	+	0.0772241	0.318422	0.061003	0.0973346	0.351929	0.0967517	0.0622165	0.0975967
AC190743.3_FG012	9:119198829-119202911	1145	-	68.0648	63.9147	49.5726	95.1334	30.4092	26.7838	67.1499	62.2099
AC190744.2_FG010	2:57935786-57936124	339	-	0	0	0	0	0	0	0	0
AC190749.3_FG006	4:162083355-162084414	411	+	0	0	0	0	0	0	0	0
AC190750.2_FG014	2:2997711-3001870	1482	+	6.68823	5.92155	9.72358	13.4811	9.54062	7.95439	6.43789	8.94226
AC190751.4_FG008	4:178807172-178807483	312	+	0	0	0	0	0	0	0	0
AC190756.4_FG007	9:16106197-16107330	870	+	0	0	0	0	0	0	0	0
AC190757.3_FG001	9:153100573-153103623	2457	-	0	0	0	0	0	0	0	0
AC190763.3_FG002	1:145489227-145489712	486	-	0	0	0	0	0	0.502117	0	0
AC190771.2_FG003	2:187863852-187864313	462	+	0	0	0	0	0	0	0	0
AC190772.4_FG011	4:28350228-28350848	474	-	0	0	0	0	0	0	0	0
AC190788.2_FG004	2:199693527-199694030	504	-	0.939804	0.194472	0.445707	0.473428	0	0.705935	0.305069	0
AC190788.2_FG005	2:199653122-199704679	2813	+	3.84966	5.26538	5.47446	5.01897	3.96646	3.07078	4.75413	5.05131
AC190789.3_FG005	10:148308797-148309303	507	-	0	0	0	0	0.299729	0	0	0
AC190792.2_FG006	2:1309281-1353156	1444	+	14.3676	27.7317	18.1479	31.7903	17.5833	34.8858	24.1917	39.8486
AC190799.2_FG010	1:9067586-9068314	729	+	0	0	0	0	0	0	0	0
AC190807.2_FG001	2:163097801-163098630	525	-	0	0	0	0.220557	0	0	0.142	0
AC190809.2_FG002	2:107076598-107077084	342	+	0	0	0	0	0	0	0	0
AC190811.1_FG003	2:145421834-145422160	327	+	0	0	0	9.23334	3.89565	16.5756	0	0
AC190812.3_FG006	8:164651212-164651926	579	+	0	0	0	0	0	0	0	0
AC190816.3_FG007	4:36485915-36488284	2370	+	0.175187	1.62249	0	0.189347	0.22911	0.250931	0.80379	0.411529
AC190832.2_FG003	4:166343551-166345199	618	-	0.134475	0.138885	0	0	0.12198	0.168413	0.108746	0.339583
AC190832.2_FG006	4:166251248-166251772	525	-	0	0	0	0	0	0	0	0
AC190834.3_FG005	5:35790-37638	1173	+	0	0	0	0	0	0	0.0453575	0
AC190841.2_FG007	2:229413601-229413924	324	-	0.631555	0.52833	1.3785	1.11156	2.52509	0.503006	0.573985	0.634134
AC190851.3_FG003	7:22553471-22554277	807	+	0	0	0	0	0	0	0	0
AC190858.3_FG004	2:58662853-58664834	924	+	0	0	0	0	0	0	0	0
AC190858.3_FG005	2:58714603-58715850	645	+	0	0	0	0	0	0	0	0
AC190882.3_FG003	8:40945691-40946202	249	+	3.35576	7.27181	18.7755	6.17974	13.5923	8.28413	16.5416	10.3723
AC190883.2_FG005	3:200195395-200198461	561	+	0	0	0	0	0	0	0	0
AC190885.4_FG006	4:184951428-184952156	729	+	1.05299	1.41242	0.748741	0.53076	0.478745	0.131901	0.934899	0.133017
AC190909.3_FG004	5:64289723-64361485	6565	-	111.87	64.6661	58.8133	71.8633	71.481	75.9176	78.2952	64.809
AC190913.3_FG002	9:19354642-19355687	930	+	0	0	0	0	0	0	0	0
AC190915.3_FG007	1:273875668-273891308	3831	-	13.4398	12.6702	7.84821	10.068	12.5881	15.1647	13.0971	13.1743
AC190922.3_FG007	5:61514481-61514972	492	+	0	0	0	0	0	0	0	0
AC190925.2_FG002	5:115287803-115288282	480	-	7.30611	3.73604	4.87767	3.17936	7.16885	4.17293	4.02837	7.30735
AC190932.3_FG008	5:175413815-175414895	621	-	0	0	0	0	0	0	0	0
AC190933.3_FG004	3:16614267-16616203	900	-	19.1778	6.10194	10.8479	14.324	5.75537	8.1679	5.88024	12.3676
AC190934.3_FG003	1:29493132-29493674	543	-	0	0	0	0	0	0	0	0
AC190978.3_FG007	4:152414586-152415092	507	-	0	0	0	0	0	0	0	0
AC190985.3_FG006	7:134309141-134330818	3728	-	1.40335	1.37293	0.955376	1.00788	1.6504	1.26966	1.59419	0.986755
AC190990.2_FG005	5:177016937-177018164	657	-	0	0	0.0968279	0.617599	0	0.153485	0.0990219	0.154759
AC190999.2_FG004	2:183934487-183945347	3917	-	2.8004	2.07636	2.50794	2.51217	2.54311	2.82855	4.10995	3.23453
AC191009.3_FG004	1:298496695-298503780	903	+	45.8036	38.2331	60.5194	51.9945	55.4507	44.5481	31.4618	44.8101
AC191012.2_FG001	3:12744245-12744814	570	+	1.06946	1.10521	0.362213	0	0.830237	0.191314	0.989579	0.771387
AC191040.2_FG002	1:11788150-11789504	786	-	0.0947526	0	0	0.11942	0	0.118687	0	0
AC191042.4_FG001	1:82643070-82673477	2205	-	0	0	0.0214051	0	0	0	0	0
AC191048.2_FG006	5:4152455-4153135	681	+	3.25363	2.63867	2.01987	5.85659	3.48367	4.94856	1.78328	2.64173
AC191049.3_FG007	1:165020409-165020804	396	-	0	0	0	0.758662	0	0	0	0
AC191050.3_FG003	2:57649929-57652315	1689	+	1.90361	73.4499	6.59194	224.415	1.10486	67.8073	0.441237	8.28704
AC191064.3_FG007	9:123602742-123603956	1215	+	0	0	0	0	0	0	0	0
AC191067.3_FG005	8:80662492-80663217	726	+	0	0	0	0	0	0	0	0
AC191069.3_FG004	8:37658183-37661513	312	-	93.9367	42.3583	94.6946	75.4619	65.775	54.0205	78.6655	66.3832
AC191069.3_FG007	8:37754215-37754684	273	-	0	0	0	0	0.820996	0	0	0
AC191070.3_FG006	4:42444474-42446902	1014	-	0	0	0	0	0	0	0	0
AC191071.3_FG001	9:150221783-150225053	1605	-	0.0388241	0.0799405	0.245301	0.0979002	0.142002	0.0486542	0.031201	0.0490971
AC191073.2_FG001	2:61954120-61954795	441	+	0	0	0	0	0	0	0	0
AC191073.2_FG003	2:61863808-61865989	507	+	0.372027	0	0.294056	0.234244	0.336013	0	0	0.234669
AC191097.3_FG007	4:195326341-195327036	696	+	3.71446	2.091	2.75693	2.26928	5.319	7.47236	2.72681	4.97601
AC191098.3_FG002	7:51517319-51517558	240	+	0	0	0	0	0	0	0	0
AC191107.4_FG001	2:168618752-168621157	2229	-	0	0	0	0	0	0	0	0
AC191107.4_FG002	2:168697786-168698573	699	+	0	0	0.0883788	0	0	0.280221	0.451618	0
AC191113.2_FG002	2:6354513-6356489	1977	-	0.103382	0.181154	0.726054	0.000767167	2.56047	0.00234207	2.84835	0.000888732
AC191115.3_FG002	2:83328915-83338644	1260	+	0	0	0	0	0	0	0	0
AC191147.3_FG002	5:151178520-151178960	441	-	0	0	0	1.51621	0	1.80898	0	0.607317
AC191246.3_FG004	5:172949242-172949751	510	-	0	0	0	0	0	0	0	0
AC191246.3_FG006	5:172931601-172933427	1827	-	0.128841	0.00125591	0.00027341	0.675107	1.54852e-05	0.611787	0.188289	0.315493
AC191251.3_FG005	5:4975268-4996103	1320	+	6.23167	4.27341	9.43049	5.37101	13.1209	10.3866	10.833	9.59116
AC191253.3_FG004	9:116818179-116819389	1002	-	0	0	0	0	0	0	0	0
AC191254.3_FG001	5:176191590-176193125	588	-	0	0	2.18251	1.83111	0.263468	2.73048	0.235265	0.367006
AC191264.3_FG002	7:150153355-150158910	1028	+	1.95181	1.16375	2.08084	3.36919	1.77089	2.76048	2.1599	3.77284
AC191279.2_FG001	10:7312893-7313774	882	+	0	0	0	0	0	0	0	0
AC191279.2_FG003	10:7323515-7324603	1089	-	0	0	0	0	0	0	0	0
AC191283.3_FG004	2:114763714-114789408	3963	+	5.3287	5.06992	8.6288	4.92626	5.11404	7.05204	5.26698	3.31992
AC191297.3_FG004	3:27437480-27437821	342	+	0	0	0	0	0	0	0	0
AC191305.3_FG002	4:217354294-217355193	900	-	0	0	0	0	0	0	0	0
AC191317.3_FG009	1:64984098-64984628	531	+	0.858894	1.0658	0.67883	0.649031	0.310668	0	0.835517	0.650283
AC191328.3_FG002	4:123691404-123691625	222	-	0	0	0	0	0	0	0	0
AC191330.3_FG001	1:7113385-7116457	2499	+	0	0	0	0	0	0	0	0
AC191338.3_FG002	2:71380652-71382612	954	-	0	0	0	0	0	0	0	0
AC191360.3_FG004	4:238406522-238407007	486	+	0.601667	0.415181	0	0	0	0	0.488665	1.51773
AC191360.3_FG015	4:238292817-238294377	585	-	0	0	0.115807	0	0	0	0.118602	0.184997
AC191361.4_FG006	5:213900649-213901182	534	-	0	0	0	0	0	0	0	0
AC191362.3_FG002	1:133182054-133182266	213	+	0	0	0	0	0	0	0	0
AC191380.3_FG001	1:169185384-169186070	687	-	0	0	0	0	0	0	0	0
AC191401.3_FG009	6:156699506-156700406	777	-	0.866406	0.0992986	0	0.242636	0.438013	0.723568	0	0
AC191401.3_FG013	6:156607386-156607793	408	+	1.69573	2.34671	0	0	1.01291	0	1.15392	1.42394
AC191410.4_FG004	5:204776084-204776825	678	-	0	0	0	0	0	0	0	0
AC191412.3_FG005	4:198870615-198910724	873	+	0	0	0	0	0	0	0	0.103841
AC191418.3_FG003	4:199093224-199093616	240	-	0	4.91394	1.80876	0	0	0	2.07625	2.768
AC191421.3_FG001	UNKNOWN:2559067-2559525	459	-	0	0	0	0	0	0	0.362715	0
AC191523.3_FG001	4:29997941-29999118	531	+	0	0	0	0	0	0	0	0
AC191526.3_FG001	5:217752873-217756118	2985	-	0	0	0	0	0	0.0243973	0	0
AC191526.3_FG004	5:217829202-217829540	339	-	0.442951	0	0.350605	0.555416	0	0	0.365586	0
AC191534.3_FG003	7:27649770-27672146	2791	+	28.6838	43.2978	18.6536	21.5613	23.6564	32.5793	25.9264	32.3648
AC191539.4_FG001	3:201176360-201176902	543	-	0	0	0	0.208396	0.149688	0.41432	0.134065	0.417588
AC191541.4_FG005	3:205536601-205539793	1113	-	0	0	0	0	0	0	0	0
AC191548.3_FG005	4:29110551-29111039	489	-	0.198341	0.205282	0.156782	0	0	0	0.161066	0
AC191551.3_FG003	3:47073741-47077076	1191	-	0	0	0.0437048	0.069755	0	0	0	0
AC191562.3_FG008	3:134779903-134780343	441	+	0	0	0	0	0	0	0	0
AC191564.3_FG003	4:42916810-42917460	651	+	0	0	0	0	0	0	0	0
AC191568.3_FG010	3:26085714-26087287	537	+	0	0	0	0	0	0	0	0
AC191575.2_FG001	1:295271450-295299652	1122	-	0	1.10437	0	0.217056	0.0784258	0.107879	0.138832	0.108812
AC191577.3_FG004	5:137122605-137124500	534	-	0	0	0	0	0.153883	0	0	0
AC191578.3_FG003	3:155626317-155627051	735	+	0	0	0	0	0	0	0	0
AC191589.3_FG003	1:72598205-72598989	600	+	0.281602	0	0	0	0	3.17391	0	0
AC191598.3_FG007	9:150235255-150236603	468	+	0	0.445214	0.169934	0	0.387369	0.807191	1.04852	0.813177
AC191601.1_FG003	2:230424076-230425859	1659	+	0.26159	0.0769424	0	0	0	0	0.180177	0.189036
AC191622.3_FG003	6:167578085-167580057	375	-	0	0	0	0	0	0	0	0
AC191622.3_FG005	6:167597768-167598226	459	+	0	0	0	0	0	0.558141	0.181357	0
AC191650.3_FG003	3:153369452-153370159	708	-	0	0	0	0	0	0	0	0
AC191654.3_FG004	2:16355785-16356291	507	-	0	0.577335	0.294056	0	0	0	0	0
AC191676.3_FG011	5:15546474-15547368	783	+	0.0952461	0.294726	0.451481	0.120032	0.520084	0.238632	0.0768263	0.240675
AC191686.3_FG002	3:56331999-56332478	480	-	0	0	0	0	0	0	0.16666	0
AC191691.3_FG011	4:14219663-14220217	348	+	0	0	0	0	0	0	0	0
AC191692.3_FG001	4:61948360-61949103	744	-	0.2046	0	0	0	0.0930451	0.128146	0	0.129235
AC191704.3_FG007	7:2736832-2737660	216	-	0	0	0	0	0	0	0	0
AC191708.3_FG001	10:78694714-78695814	1101	+	0	0	0	0	0	0	0	0
AC191708.3_FG002	10:78741804-78742895	1092	-	0	0	0	0	0	0	0	0
AC191731.3_FG001	7:57417649-57418650	1002	+	0	0	0	0	0	0	0	0
AC191735.3_FG009	7:149892322-149893139	549	-	0	0	0	0	0	0	0	0
AC191748.3_FG001	3:216727940-216730851	834	-	0	0	0	0.220223	0	0	0	0
AC191771.3_FG008	5:60600084-60675623	1125	-	24.7555	25.1319	30.7881	32.741	26.8883	24.0325	34.8603	25.8891
AC191778.3_FG001	4:17874484-17875002	519	+	0	0	0	0	0	0	0	0
AC191782.3_FG001	3:67989522-67990399	702	-	0	0	0	0	0	0	0	0
AC191790.3_FG005	3:89622172-89624208	561	-	0	0	0	0	0	0	0	0
AC191804.4_FG002	5:153141720-153142088	369	-	0	0	0.281106	0.446378	0.632921	0	0	0.447025
AC191927.2_FG002	6:114269543-114269977	435	-	0	0	0	0	0	0	0	0
AC191961.3_FG009	2:14869123-14872799	1176	+	0.0561986	0.173673	0.177555	0	0.307876	0.140839	0.316505	0.0710488
AC192175.3_FG001	9:152882932-152883348	417	-	0	0	0	0	0	0	0	0
AC192177.3_FG008	4:38795874-38796191	318	+	0	0	0	0	0	0	0	0
AC192204.3_FG005	1:204074774-204076473	753	+	0.100581	0	0	0	0	0	0	0
AC192240.3_FG005	5:67213921-67214507	528	+	0	0	0	0.21843	0	0	0	0
AC192244.3_FG001	5:76210477-76210827	351	+	78.3277	62.667	80.6105	51.8738	76.8218	55.6512	69.753	72.3061
AC192244.3_FG007	5:76217166-76222777	3119	+	1.45477	2.16224	1.96431	2.04976	3.47095	4.44758	1.95442	5.05201
AC192330.1_FG004	10:140597198-140599033	1260	+	0	0	0	0	0	0	0	0
AC192356.3_FG003	7:161939954-161944649	684	-	0	0	0	0	0	0	0	0
AC192362.3_FG002	1:230119710-230123616	2480	+	7.58534	12.107	12.0185	8.72766	2.51558	1.76066	4.83701	4.43595
AC192367.2_FG002	4:58493016-58540370	4781	-	3.21092	3.25419	3.34348	3.14118	2.27832	3.55117	2.84862	2.11987
AC192368.3_FG009	4:65886858-65887355	498	+	0	0.198657	0	0	0	0	0	0
AC192372.3_FG003	5:124080792-124081139	348	-	1.26679	1.07851	0	1.62906	0.660169	0.319434	0.592857	0.412335
AC192381.3_FG004	1:285337811-285338212	402	-	0	0	0	0	0	0	0	0
AC192405.3_FG001	4:207025823-207026760	417	-	0	0	0	0	0	0	0	0
AC192451.3_FG001	5:137851626-137855682	1277	-	98.3166	129.642	111.948	101.835	100.23	106.618	118.88	141.933
AC192608.3_FG004	1:202528876-202529268	393	+	0.613522	0.318649	0.727884	1.92888	0.274309	0	0	0.38624
AC193318.3_FG006	3:184263929-184264721	762	-	0	0	0	0	0	0	0	0
AC193319.3_FG004	4:85141293-85141781	489	+	0.396681	0	0.156782	0	0	0	0	0
AC193324.3_FG002	10:137902848-137995683	4652	+	18.0965	18.7331	19.0584	15.6966	31.7892	19.8228	16.6835	12.3259
AC193335.3_FG001	1:174059634-174060020	387	-	0	0	0	0	0	0	0	0
AC193353.3_FG002	3:143596873-143603875	906	+	0.0782334	0	0	0	0	0	0	0
AC193379.3_FG001	3:186061860-186069832	2940	-	0.0395744	0.162871	0.0625088	0.0499068	0.163102	0.124002	0.079412	0.0750923
AC193402.3_FG004	10:120443593-120444114	522	-	0	0	0	0.222726	0	0	0.143415	0.892587
AC193423.3_FG003	2:81077859-81078659	801	-	0	0	0.0729249	0	0.084028	0	0	0
AC193430.3_FG008	8:143093861-143094625	765	-	1.08215	1.21778	0	0	0	0	0	0
AC193440.3_FG009	2:46859147-46861689	645	+	0.125984	0.390238	0.199094	0	0.114359	0.157788	0	0.318186
AC193464.3_FG001	3:45917973-45918952	702	+	0	0	0	0	0	0	0	0
AC193466.3_FG001	2:175780513-175781004	492	+	0	0	0	0	0	0	0	0
AC193479.2_FG002	8:69054507-69054959	453	+	0	0	0	3.36932e-05	0	0	0.100814	0.908336
AC193499.3_FG004	2:174553617-174554321	705	-	0.070898	0.114015	6.26171	3.78094	6.08434	5.34486	8.41927	5.43142
AC193499.3_FG007	2:174566202-174567989	576	-	0	0	0	0	0	0	0.121607	0.189628
AC193500.3_FG003	1:1780238-1781389	1152	+	1.21048	0.356283	0.728465	0.290657	0.894607	1.08341	1.29865	0.801587
AC193502.3_FG004	7:100684254-100687529	879	-	0	0	0	0	0	0	0	0
AC193503.3_FG004	7:9131788-9132330	543	+	0	0	0	0	0	0	0	0
AC193576.3_FG003	10:96468453-96468979	309	+	0	0	0	0	0	0	0	0
AC193591.3_FG001	4:226791362-226791868	507	+	1.11608	0.192445	4.70489	1.40546	0	1.86302	4.528	1.40801
AC193592.3_FG001	9:39369670-39373570	621	+	0	0	0	0	0	0.167162	0	0
AC193598.3_FG002	6:5503430-5507323	3894	+	0.0879171	0.105514	0	0	0.0134259	0	0.105816	0.0185374
AC193606.2_FG001	5:79175814-79176557	744	-	0	0	0	0	0	0	0	0
AC193606.2_FG005	5:79197084-79198076	993	-	0	0	0	0	0	0	0	0
AC193625.3_FG008	4:12100075-12100521	447	+	0.469239	0	0	0	0	0	0	0
AC193625.3_FG010	4:12107203-12110797	1071	-	0.441795	0.650273	0	0.0795559	0.547102	0.869861	0	0
AC193630.3_FG003	9:19931557-19933396	1044	-	0	0	0	0.082153	0	0.244979	0.0524659	0.0823822	WRKY
AC193630.3_FG004	9:19927943-19928845	903	-	0	0.162005	0.0620712	0.297111	0	0.196888	0.126622	0
AC193632.2_FG002	4:39794254-39796948	2312	-	0.282939	0.446202	0.487483	0.252263	0.642703	0.334692	0.640215	1.05602
AC193645.3_FG006	10:82386509-82388113	1605	+	0	0	0	0	0	0	0	0
AC193646.3_FG002	9:129725276-129726237	810	+	0	0	0	0	0	0	0	0
AC193658.3_FG001	9:25177431-25177877	447	+	0.703859	0.486251	0	0.295334	0	0.880895	0	0.295754
AC193668.3_FG009	9:21957818-21961838	723	-	0	0	0	0	0	0	0	0
AC193744.3_FG009	4:240994205-240995056	645	-	0.125984	0	0	0	0	0	0	0
AC193745.3_FG002	1:283191829-283193058	1230	-	0	0	0	0	0	0.0666656	0	0
AC193745.3_FG003	1:283196092-283197282	1191	-	0	0	0	0	0	0	0.267096	0
AC193754.3_FG005	2:36034684-36035349	666	-	0	0	0	0	0	0	0	0
AC193754.3_FG008	2:35880818-35882857	2040	-	0.000127128	0.000800756	0.00350447	0.285996	0	0.00261823	8.28116e-05	0
AC193756.3_FG001	1:135626857-135627285	429	-	0	0	0	0	0	0	0	0
AC193767.3_FG003	10:149322937-149324124	1101	+	0	0	0.0481578	0	0	0	0.0490681	0	B3
AC193786.3_FG005	8:157922747-157923803	744	+	0.409199	0.316627	0.161645	0.644569	0.18609	0.128146	0.247661	0.129235	bHLH
AC193787.3_FG008	2:30493551-30494000	450	-	0	0.479931	0	0	0.625152	0.869552	0	0
AC194005.3_FG004	6:61414180-61414791	612	-	0	0.42302	0	0.343973	0	0	0	0
AC194008.3_FG007	1:255633661-255635871	768	+	0	0	0	0	0	0	0	0
AC194016.3_FG001	2:113078080-113078373	294	+	0	0	0	0	0	0	0	0
AC194022.3_FG013	3:2783126-2783395	270	+	50.5831	173.43	9.46973	25.2249	8.88093	7.24826	8.34054	0.912056
AC194022.3_FG014	3:2784615-2788214	1194	+	0.0551628	0.0568221	0	0	0	0	0	0
AC194031.3_FG002	9:38954483-38955208	726	-	0	0	0	0	0	0	0	0
AC194032.3_FG010	9:151696414-151699380	606	-	0	0	0	0	0	0	0	0
AC194039.4_FG009	3:216930550-216931065	516	-	0	0	0	0	0	0	0	0
AC194045.3_FG001	9:53404871-53405466	456	-	0	0	0	0	0	0	0	0
AC194047.3_FG006	8:92024966-92026477	516	-	0.180407	0	0	0	0	0	0	0
AC194056.3_FG008	3:213548727-213548999	273	+	0	1.02828	0.768484	0	2.46299	2.41037	1.65633	0
AC194072.3_FG005	1:282542199-282545370	1798	-	0.136033	0.636	0	0	0	2.7311e-06	0.519297	0.217878
AC194097.3_FG008	8:173750803-173760583	621	-	2.86606	1.66012	0	0	0.958081	4.43288	1.17105	1.35244
AC194101.3_FG001	3:99477428-99478261	366	-	0	0	0	0	0	0.453255	0	0
AC194103.3_FG006	10:18729957-18730742	786	-	0.663205	0.195444	0.374248	0.238798	0.172454	0.118687	0.152837	0.239408
AC194104.3_FG007	10:5388174-5389202	1029	+	0	0	0	0	0	0	0	0
AC194104.3_FG010	10:5375713-5375937	225	-	0	0	0	0	3.20461	0	0	20.9144
AC194112.3_FG001	8:66098326-66099375	1050	-	3.68807	6.53371	5.21307	5.30149	4.3096	3.56714	3.75021	2.20831
AC194133.3_FG004	4:208722432-208724291	399	+	0	0	0.2346	0.746195	0	0	0	0
AC194136.3_FG001	10:85451381-85451803	423	+	0	0	0	0	0	0	0	0
AC194157.3_FG001	2:80813287-80813490	204	-	0	0	0	0	0	0	0	0
AC194158.3_FG005	5:17891415-17892008	594	+	0	0	0	0	0	0	0	0
AC194163.3_FG001	2:137495512-137496495	807	+	0	0	0	0	0	0	0	0
AC194163.3_FG002	2:137439230-137439622	393	-	0	0	0	0	0	0	0	0
AC194163.3_FG003	2:137446303-137447088	786	-	0	0	0	0	0	0	0	0
AC194172.3_FG008	1:190071422-190074884	1197	-	0	0	0	0	0	0	0	0
AC194174.3_FG003	7:102139586-102140110	525	+	0	0	0	0.220568	0.158323	0	0	0
AC194176.3_FG002	1:183526617-183527207	591	-	0.432577	0.44691	1.25341	0.726568	0	0.541715	1.40015	0
AC194180.3_FG004	4:189240369-189240890	522	+	0	0	0	0	0	0	0	0
AC194203.3_FG003	2:212486387-212487524	423	-	0	5.17742	0.0502014	0	0	1.01705	0	0
AC194206.3_FG005	8:59128893-59130902	1332	-	0	0	0	0	0	0	0	0
AC194214.3_FG002	6:139111324-139114690	867	+	0	0	0	0	0	0	0	0
AC194219.3_FG002	5:39141456-39142578	843	-	0	0	0.0680269	0	0	0	0	0
AC194259.3_FG001	4:241262701-241265713	1167	+	0	0.0584407	0	0	0	0	0.0456452	0
AC194264.3_FG006	1:205501577-205530039	3300	+	23.5118	27.6624	14.359	22.996	33.3481	44.8968	21.7787	37.6726
AC194272.3_FG003	1:195556984-195557812	402	+	0.291807	1.51482	0	1.10119	0.783776	1.09518	0.23843	0
AC194273.3_FG006	10:78956952-78958046	1095	-	0	0	0	0	0	0	0	0
AC194273.3_FG007	10:78903512-78904640	1092	+	0	0	0	0	0	0	0	0
AC194298.3_FG005	3:204583775-204583963	189	-	50.2933	0	55.4176	330.106	500.482	68.6844	63.902	77.1106
AC194321.3_FG009	5:174446738-174447238	501	+	2.08953	0.196542	1.50142	1.19597	1.37218	0.713393	2.00419	1.43771
AC194325.3_FG006	2:33087267-33088224	651	-	0	0	0	0	0	0	0	0
AC194335.3_FG001	4:37598519-37599609	1005	+	0	0	0	0	0	0	0	0
AC194338.3_FG008	5:16618955-16619887	741	-	0.102886	0	0	0	0	0	0	0
AC194341.4_FG001	8:141396920-141398654	1335	+	0	0	0	0	0	0	0	0
AC194341.4_FG002	8:141393007-141395668	782	-	198.654	103.633	210.914	150.185	237.836	170.721	181.582	164.19
AC194341.4_FG003	8:141389953-141391991	1770	+	0	0	0.0548068	0	0	0	0.111511	0
AC194341.4_FG004	8:141377175-141379250	1706	+	1.87555	2.97374	3.35224	1.9284	1.80498	1.26991	2.20955	1.26958
AC194350.3_FG001	6:118181212-118184396	990	+	0	0	0.110158	0.52735	0	0.174728	0	0.176267
AC194355.3_FG002	8:56190336-56191277	693	-	0.113269	0.116902	0.0894944	0	0	0	0.0914714	0.143067
AC194356.3_FG002	4:138519896-138520444	549	-	0	0	0.25678	0.204616	0	0	0	0.205026
AC194357.3_FG003	4:197730255-197730692	438	-	0	0	0	0	0	0	0	0
AC194362.3_FG003	3:231992588-231993990	651	-	0	0	0	0	0	0	0	0	WRKY
AC194380.3_FG008	1:185408983-185412408	744	-	0	0.105542	0	0	0	0	0	0
AC194389.3_FG001	1:80167006-80183074	2221	-	12.0296	20.6977	14.0146	12.8496	11.9363	11.9864	14.0778	6.97187
AC194402.2_FG003	5:14568445-14570968	870	+	0	0.170219	0	0.104042	0	0	0	0
AC194402.2_FG004	5:14653637-14654221	585	+	0.146546	1.0599	0.347427	1.10762	0.398388	0.73409	0.237212	0
AC194405.3_FG009	8:171568251-171569394	204	-	0	0	0	0	0	0	0	0
AC194405.3_FG021	8:171591230-171595664	2402	+	0.0529213	0.528586	0.263666	0.0647701	0.270919	0.0994978	0.74241	0.259879
AC194410.3_FG002	10:31946868-31947689	822	+	0.0891024	0.0918862	0.211172	0.22459	0	0	0.215526	0.112587
AC194425.3_FG005	3:191278501-191278839	243	+	20.2302	130.227	73.14	66.9848	40.3518	74.4241	99.8951	19.9806
AC194428.3_FG006	1:5016684-5020549	906	-	0	0	0	0	0.0712997	0	0	0.0988706
AC194428.3_FG007	1:5022109-5023466	483	+	0	0	0	0	0	0	0	0
AC194438.3_FG005	8:67904690-67905172	483	+	0	0	0	0	0	0	0	0
AC194439.3_FG002	8:85418692-85424667	5458	-	2.68478	4.47514	0.864438	0.915619	0.955928	0.676264	2.73369	1.19313
AC194452.3_FG001	1:179573339-179573803	465	-	0	0	0	0.273904	0	0	0	0
AC194457.3_FG001	7:39565351-39566853	1503	-	0.0419043	0	0.0661918	0	0.0383073	0	0	0.0529897
AC194467.3_FG006	10:39183788-39187538	1695	+	0.0729186	0.0375328	0.0287946	0	0.0666899	0.0456915	0	0
AC194472.3_FG001	2:216057911-216059193	225	+	0	0	0	0	0	0	0	0
AC194478.3_FG005	6:72257836-72260373	1119	+	0	0	0	0	0	0	0	0
AC194480.3_FG001	1:172297520-172297765	246	+	0	0	0	0	0	0	0	0
AC194480.3_FG003	1:172219663-172219908	246	-	0	0	0	0	0	0	0	0
AC194481.3_FG002	10:88950765-88951911	501	+	0	0	0	0	0	0	0	0
AC194485.3_FG002	10:108742841-108743459	501	-	0	0	0	0	0	0	0	0
AC194591.2_FG004	5:97188507-97189302	714	+	0	0	0	0	0	0	0	0
AC194591.2_FG005	5:97265938-97266417	480	-	0	0	0	0	0	0	0	0.258715
AC194592.2_FG001	6:122382035-122383347	915	-	0.0772241	0	0	0	0.0703858	0.290255	0	0.195193
AC194597.2_FG001	6:54651846-54652382	537	-	0	0	0	0	0	0	0.13661	0
AC194609.2_FG003	1:176048282-176048980	699	-	3.24389	1.76363	1.16098	2.4273	2.12696	2.10171	1.61894	0.578403
AC194613.2_FG002	5:122261363-122261839	477	+	0	0	0	0	0	0	0	0
AC194633.3_FG014	8:8338591-8340102	825	-	0.0886625	0	0	0.111741	0	0	0	0
AC194666.2_FG010	4:9726171-9732713	1410	+	0.045172	0.0465154	0.178387	0.0569507	0.908228	0.283035	0.0363175	0.0571188
AC194670.2_FG001	4:206484654-206487204	495	-	0	0	0	0	0	0	0.15754	0
AC194705.3_FG004	2:43736695-43738206	972	+	0	0	0	0	0	0	0	0
AC194712.3_FG002	4:151295735-151296493	759	-	0.0994666	0.410438	0.157166	1.37881	0.452448	0.249199	0.240758	0.628307
AC194719.3_FG002	9:9970215-9970754	540	+	0	0	0	0	0	0	0.135326	0
AC194734.3_FG004	3:23529559-23529969	411	-	0.278243	0	0.220038	0.350077	0.498787	0	0	0
AC194824.2_FG003	6:120529782-120532175	1539	-	0	0	0	0	0	0	0	0
AC194824.2_FG005	6:120509134-120510415	1134	+	0	0	0	0.0740906	0.0536523	0.0736449	0.0472948	0
AC194828.3_FG004	6:150741162-150741959	525	+	0	0.724474	0	0	0.316639	0.219267	0	0
AC194828.3_FG012	6:150868130-150868720	591	-	0	0	0	0	0	0	0	0
AC194839.3_FG001	3:164342167-164342987	675	+	0	0	0	0	0	0	0	0
AC194852.3_FG007	6:103636711-103638258	1350	+	0.047565	0	0.187839	0.719598	0	0	0	0
AC194853.1_FG002	6:77482134-77482573	285	-	0	0	0	0.991091	0	0	0	0
AC194856.3_FG002	1:116709786-116709992	207	+	0	0	0	0	0	0	0	0
AC194856.3_FG007	1:116716549-116716755	207	+	0	0	0	0	0	0	0	0
AC194863.3_FG004	1:8573835-8577024	2223	+	0	0	0	0	0	0	0	0
AC194863.3_FG006	1:8551951-8553427	1233	-	0.106089	0.0546363	0.0418969	0	0	0.0664688	0	0
AC194863.3_FG007	1:8549323-8551254	1503	+	0.377139	0.129438	0.463342	0.0528324	0.153229	0.47262	0.269466	0.158969
AC194878.3_FG001	9:25678093-25678629	537	+	0	0	0	0	0	0	0.27322	0.425406
AC194878.3_FG002	9:25684589-25685125	537	+	0	0	0	0	0	0	1.77593	0.850812
AC194895.3_FG004	3:6968789-6969017	195	+	0	0	0	0	0	0	0	0
AC194897.4_FG003	4:129620391-129621465	717	-	0	0	0	0	0	0	0	0
AC194897.4_FG005	4:129658485-129659629	744	+	0	0	0	0	0.0930451	0.256293	0	0
AC194898.3_FG003	8:43051761-43054341	2199	-	0	0.0559563	0	0	0.0248838	0.0340726	0	0
AC194905.2_FG001	1:148230257-148231375	1119	+	0	0	0	0	0	0	0	0
AC194905.2_FG003	1:148315547-148317467	1167	+	0	0	0	0	0	0	0	0
AC194912.3_FG003	5:195109206-195109790	585	-	0	0	0	0	0	0	0	0
AC194914.3_FG002	1:99538428-99539066	639	-	37.4385	24.1447	21.6064	20.445	24.2376	24.0048	22.8259	15.1671
AC194937.3_FG004	5:118931065-118932228	735	+	2.02108	6.87255	10.0849	4.94074	5.78227	2.71559	8.35102	2.2315
AC194940.3_FG001	9:119056647-119056907	261	+	0	0	0	0	0	0	0	0
AC194942.3_FG001	8:105209528-105212959	1462	+	0.710644	0.195057	0	0	0.441213	0.254258	0.378174	0
AC194965.4_FG001	6:127377811-127382429	2850	-	2.49436	3.93728	7.57979	7.59561	6.38664	5.36261	2.9378	1.75916
AC194965.4_FG004	6:127446073-127447275	432	-	1.00407	2.08208	0.99239	7.26639	1.35299	4.39766	1.43185	3.1634	GATA
AC194970.5_FG001	2:207236995-207238335	1104	-	6.01547	9.01465	4.5595	15.7788	6.98776	8.37493	6.8951	12.1364
AC194970.5_FG002	2:207226133-207227831	1429	-	5.73581	3.57758	6.91214	4.40746	6.5021	4.56901	10.2993	7.58537	BES1
AC194970.5_FG004	2:207351561-207363537	2546	+	48.7604	53.2127	34.8792	68.1232	45.9703	55.3104	41.3328	52.0869
AC194970.5_FG005	2:207250877-207255958	1649	-	21.4973	20.0748	32.9117	25.339	24.8982	27.7345	24.3232	25.8729
AC194970.5_FG009	2:207265904-207268967	1437	+	48.015	37.206	42.1787	35.0849	43.0775	46.2208	43.0611	39.6013
AC194972.2_FG001	3:212830524-212831417	894	+	0	0	0	0	0	0	0	0	C2H2
AC194974.3_FG001	5:207565158-207565799	642	+	0	0	0.100251	0	0	0	0	0
AC194974.3_FG005	5:207664032-207665207	1038	-	0	0.202943	0.207425	0.0827534	0	0	0.158554	0.0829839
AC194977.2_FG004	7:160015814-160022084	948	-	0	0	0	0	0	0	0	0
AC194980.3_FG002	4:177605987-177606388	402	+	150.214	43.6269	64.017	39.8577	86.3106	53.9391	100.797	110.425
AC194980.3_FG005	4:177627453-177627752	300	+	1.95591	0	2.06648	0	0	0	1.63721	0
AC195058.3_FG003	10:79537393-79537803	411	+	0	0	0.440075	0	0.249393	0	0.227143	0
AC195135.3_FG002	1:288805503-288805775	273	-	0	0	0	0	0	0	0	0
AC195138.3_FG004	7:163592319-163592790	417	-	0	0.559987	0.213414	0	0	0	0	0
AC195147.3_FG001	7:168107563-168108606	1044	+	0	0	0	0	0	0.0816596	0.0524659	0
AC195147.3_FG008	7:168081874-168082344	471	+	0	0	0	0	0	0	0	0
AC195148.3_FG001	9:80267167-80267728	519	+	0	0	0	0	0	0	0	0
AC195154.3_FG004	3:203463280-203519842	8647	+	13.2501	17.1988	12.2013	20.9338	17.1053	14.2256	14.7309	21.4555
AC195168.2_FG004	3:71646588-71646926	339	+	7.53016	2.31108	0	0	1.56677	10.5173	3.29028	1.66948
AC195172.3_FG001	8:4467802-4473237	1440	+	0.775833	0.490261	0	0.222215	0.120822	0	0.9688	0.55432
AC195174.2_FG007	8:20678319-20678549	231	+	0	0	0	3.94025	0	3.81994	0	0
AC195207.2_FG002	1:161538847-161541164	972	-	0	0	0	0	0	0	0	0
AC195214.3_FG007	2:216565441-216565914	474	+	0	0	0	0.264314	0.567705	0	0	0
AC195220.3_FG003	6:101015752-101016559	579	+	0	0	0	0	0	0	0	0
AC195220.3_FG004	6:101051052-101054414	630	-	0	0	0	0	0	0	0	0
AC195220.3_FG007	6:101099347-101103038	1689	+	0	0	0	0	0	0	0	0
AC195230.2_FG003	8:25947985-25948836	633	+	0.129621	0.535405	0	0	0	0.16234	0	0
AC195235.3_FG003	2:13459177-13467511	1320	-	0	0.0503183	0.0385902	0	0	0	0	0
AC195240.4_FG002	10:621942-622867	729	+	0	0	0	0	0	0	0	0
AC195244.3_FG008	3:189392497-189393267	594	+	0	0	0	0	0	0	0	0.180586
AC195253.3_FG002	2:75987204-75987581	378	+	0	0	0.795981	1.26464	0.897656	0	0.549696	0
AC195260.2_FG007	1:13031896-13034701	555	-	0	0	0	0	0	0	0	0
AC195307.3_FG001	1:239157691-239158677	654	+	0.123387	0	0.682455	0.466379	0	0	0.199415	0.46746
AC195320.3_FG003	2:33782141-33783901	1761	+	0	0	0	0	0	0	0	0
AC195331.3_FG008	3:218772014-218772199	186	+	303.439	242.158	543.648	156.3	216.709	24.7028	449.733	170.394
AC195340.3_FG001	5:5433227-5435612	1353	-	901.3	1084.26	1290.3	1087.37	1049.26	953.951	949.111	771.988
AC195340.3_FG002	5:5423516-5426755	1063	+	173.683	111.777	173.354	146.881	185.794	153.75	156.376	146.373
AC195340.3_FG004	5:5377637-5383370	4262	-	7.72769	9.92804	2.97544	19.3289	5.61284	12.2866	5.03149	15.9033
AC195340.3_FG005	5:5384487-5386557	453	-	0	0	0	0	0	0	0	0
AC195342.3_FG002	2:58045076-58045438	363	-	0	0	0	0	0	0	0	0
AC195343.3_FG002	7:77596064-77596527	339	+	0	0	1.05183	1.11084	0	0	0	0
AC195347.4_FG004	5:180876768-180878219	1452	+	9.11078	11.3281	4.76634	5.3928	5.51962	5.76454	7.23969	6.83919
AC195348.3_FG004	3:183090121-183090453	333	+	0	0	0	0	0	0	0	0
AC195351.3_FG001	6:73648210-73649115	906	-	0	0.0806485	0	0	0	0.294047	0	0
AC195351.3_FG003	6:73507271-73508050	780	-	0	0	0.0756483	0.241343	0.0871392	0.119952	0	0.120978
AC195367.3_FG001	4:111327674-111328183	510	+	0	0	0	0	0	0	0	0
AC195370.3_FG004	7:65750419-65751315	705	+	0	0	0	0	0	0.138388	0	0
AC195378.3_FG001	1:60523640-60524197	558	+	0	0	0	0	0	0	0	0
AC195389.3_FG001	6:10065965-10067032	957	+	0	0	0	0	0	0.0912603	0	0
AC195402.3_FG001	1:130816504-130816977	474	+	0	0	0	0	0.37847	0	0	0
AC195458.3_FG001	5:205475917-205476177	261	+	0	0	0	0	0	0	0	0
AC195484.3_FG003	7:93389141-93391776	2340	-	0.0253804	0	0.0200436	0.0640492	0.0464683	0	0.0203792	0.0321033
AC195485.3_FG002	3:108852322-108854094	1260	+	0.155013	0.053219	0.122435	0.195422	0.0471966	0.129496	0	0.195988
AC195536.3_FG006	8:150420438-150420719	282	-	0	0	0	0	0	0	0	0
AC195545.3_FG003	2:84787614-84788138	525	-	0	0	0	0	0	0	0	0
AC195580.2_FG010	9:8679847-8680179	333	+	0	0	0	0	0	0	0	0
AC195587.4_FG003	6:78468901-78470928	855	+	0.0844918	0	0.200238	0.106541	0.384811	0.741013	0.136207	0.213536
AC195587.4_FG004	6:78610195-78626233	4603	+	1.86122	3.99457	5.13745	3.97546	4.22857	8.03585	5.10427	2.55948
AC195596.3_FG002	2:98100885-98101433	549	+	0	0	0	0	0	0	0	0
AC195596.3_FG005	2:98072714-98073262	549	-	0	0	0	0	0	0	0	0
AC195608.3_FG005	1:243398732-243399397	666	-	0	0.123966	0	0	0	0	0.291059	0
AC195608.3_FG006	1:243383730-243384143	414	-	0	0	0	0	0	0	0	0
AC195685.3_FG001	5:138416997-138420989	1032	+	0	0	0	0	0	0	0.0532421	0.0835945
AC195785.3_FG004	1:180815825-180818527	2703	-	1.19206	1.85099	1.33505	1.01124	1.70686	1.68422	1.06133	0.95958
AC195794.3_FG002	1:207891946-207892644	699	+	0	0	0.441894	0	0.101657	0	0.0903235	0
AC195796.3_FG001	4:162559851-162561371	462	+	0	0.456215	0.348215	0	0.198348	0.275653	0.179101	0.277684
AC195798.3_FG001	8:83776314-83776649	336	-	0	0	0	0	0	0	0	0
AC195806.3_FG001	6:48716520-48716939	420	-	0	0	0.158706	0	0	0	0.216877	0
AC195807.3_FG004	8:158365405-158365749	345	-	0	0	0.668199	3.70682	1.49566	1.58281	0.347957	0.530512
AC195825.3_FG001	2:179084546-179087469	1911	+	0.0954282	0	0	0.160433	0.0291036	0	0.025552	0
AC195826.2_FG006	7:121543689-121544528	840	+	0	0	0	0	0	0	0	0
AC195860.3_FG002	6:163910475-163912307	1833	+	0.13338	0.20594	0.0263346	0.042044	0.213533	0.376106	0.0267883	0.126516
AC195860.3_FG005	6:163870844-163873846	767	+	4.93155	3.75099	2.18153	5.1529	4.59577	6.4131	8.22427	3.32521
AC195860.3_FG006	6:163868874-163870703	1284	-	27.628	20.5997	30.3187	21.777	29.5291	37.8484	24.2106	25.4166
AC195864.3_FG017	7:167500409-167502067	1659	+	0.896875	0.846366	0.767359	0.848107	0.580976	0.655651	1.021	0.425332
AC195864.3_FG020	7:167486406-167486747	342	-	0	0	0	0	0	0	0	0
AC195874.2_FG002	2:219552727-219558681	701	-	95.3952	73.1735	109.243	121.702	103.615	84.3885	80.4478	104.1
AC195914.2_FG002	5:141952954-141953631	678	-	0.350874	0.241447	0	0	0	0	0	0
AC195914.2_FG003	5:142001419-142001730	312	-	0	0	0	0	0	0.710796	0	0
AC195920.3_FG006	6:3902242-3903137	681	+	0	0	0	0	0	0	0	0
AC195946.3_FG003	8:66401912-66402175	264	-	0	0	0	0	0	0	0	0
AC195954.3_FG001	5:46563713-46564144	432	+	0	0.26026	0	0	0	0	0.4091	0
AC195957.3_FG003	5:88559615-88560763	300	+	0.65197	0.685115	0.516621	2.44139	0	0	1.63721	1.63269
AC195959.2_FG004	9:709107-712584	717	+	0	0	0	0	0	0	0	0
AC195980.2_FG004	3:143816074-143819209	2142	-	3.00974	1.71178	0.0246272	0	0	0	1.01632	1.34467
AC195989.3_FG004	8:94612455-94612904	450	-	0.231594	0	0	0	0	0.289851	0	0
AC195995.3_FG006	4:147503177-147504020	717	+	0	0	0	0	0	0	0	0
AC195995.3_FG008	4:147570061-147570672	612	-	0	0	0	0	0	0	0	0
AC195999.3_FG005	4:118469184-118469705	522	-	0	0	0	0	0	0	0	0
AC196002.2_FG002	4:8901387-8901950	564	+	0.310849	0.321269	0.491317	0.783092	0.562948	1.36236	0.629302	0.588529
AC196008.1_FG001	5:207902423-207904075	810	-	0	0	0	0.114567	0	0	0	0
AC196008.1_FG004	5:208010843-208011523	681	+	0	0	0	0	0	0	0	0
AC196009.2_FG008	3:166319780-166319983	204	-	0	0	0	0	0	0	0	0
AC196018.3_FG003	1:278942979-278945989	1137	+	0	0	0	0	0	0	0	0
AC196019.3_FG001	3:166945362-166948809	885	+	0	0	0	0	0	0	0	0
AC196025.3_FG001	5:71090220-71091816	1107	+	0	0	0	0	0	0	0	0
AC196025.3_FG002	5:71094630-71095311	462	-	0	0	0	0	0	0	0	0
AC196025.3_FG008	5:71066901-71067305	405	-	0	0	0	0	0	0	0	0
AC196025.3_FG009	5:71064305-71065383	642	+	0	0	0	0	0	0	0	0
AC196025.3_FG010	5:71060761-71061341	453	-	0	0	0	0	0	0	0.186045	0
AC196025.3_FG011	5:71043333-71054168	1218	-	0	0	0	0	0	0	0	0
AC196025.3_FG012	5:71034799-71035212	414	-	0	0	0	0	0	0	0	0
AC196025.3_FG013	5:71032751-71033828	642	+	0	0	0.200502	0	0	0	0	0
AC196025.3_FG015	5:71015096-71017589	747	+	1.0172	0.524712	0.964374	0.640921	0.74018	0.254842	0.574581	1.02803
AC196035.3_FG002	2:149901167-149901855	354	+	0	0	0	0	0	0	0	0
AC196043.3_FG005	4:126949528-126950031	504	-	0	0.972359	0.148568	1.18346	0	0.235312	0.915195	0.94847
AC196048.2_FG001	1:91013468-91014430	375	-	0	0	0	0	0	0	0	0
AC196059.3_FG003	9:150711305-150714399	1130	-	4.48637	2.12852	4.61607	2.82778	3.28706	2.81077	4.41777	3.50744
AC196065.3_FG001	7:53177169-53177612	444	-	0	0	0	0	0	0	0	0
AC196066.3_FG003	1:248421517-248462233	2676	-	25.5878	20.7271	18.3059	28.374	28.0693	28.7183	25.7287	29.0718
AC196082.3_FG001	8:99954430-99955095	666	-	1.56112	2.10742	0	0	0	0	1.06722	1.36494
AC196090.3_FG006	9:154016088-154018334	2247	+	7.72413	5.24465	13.7931	14.2247	12.7799	10.9781	10.295	13.8995
AC196096.3_FG005	4:55195897-55198076	753	+	0	0	0	0	0	0	0	0
AC196105.3_FG002	3:151807641-151808771	558	-	0	0	0	0	0	0	0	0
AC196106.2_FG001	2:227173374-227175299	1926	+	0	0	0	0	0	0	0	0
AC196110.4_FG004	4:15320883-15321409	474	+	1.04967	0	0	0	0	0	0.341221	0
AC196123.3_FG001	3:159705815-159708050	1740	-	0	0	0	0	0	0	0	0
AC196130.3_FG002	3:161259783-161259983	201	+	0	0	0	0	0	0	26.2937	0
AC196135.3_FG006	8:156462526-156463419	894	+	0	0	0	0	0	0	0	0
AC196143.2_FG003	3:88049163-88050107	945	-	0	0	0	0	0	0	0	0
AC196154.3_FG014	4:236906778-236907095	318	-	0.535375	3.36235	0.847939	1.33992	0	0	0	0.671612
AC196154.3_FG018	4:236929480-236932546	1137	-	0	0	0	0	0	0	0	0
AC196156.3_FG003	1:261093688-261132663	282	-	0	0	0.473363	16.7258	0	7.59618	0.378725	0
AC196158.3_FG002	8:31979904-31980515	612	-	0	0	0	0	0.123814	0	0	0
AC196161.3_FG002	1:45740188-45740709	522	+	0	0	0	0	0	0	0	0
AC196161.3_FG004	1:45749751-45750281	531	-	0	0	0	0	0	0	0	0
AC196170.2_FG003	3:140687785-140688711	927	+	0	0	0	0	0	0	0	0
AC196171.6_FG002	9:38236084-38237808	909	-	0	0.0802978	0	0	0	0	0	0.295327
AC196202.3_FG007	10:71810095-71810736	642	-	0	0	0	0.159848	0	0	0	0
AC196206.3_FG007	2:2959131-2960069	585	-	1.02582	1.96837	0	0	0.398545	0.550605	2.37203	0.55499
AC196212.3_FG001	2:99001493-99001696	204	+	0	0	0	0	0	0	20.3154	0
AC196213.3_FG001	5:124406951-124407367	417	+	0	0	0	0	0	0	0	0
AC196259.2_FG010	8:144854960-144864898	1190	+	3.15353	2.00939	4.00014	5.1037	6.96329	3.09856	6.96987	3.12295
AC196262.4_FG006	4:10038130-10040047	516	+	0	0	0	0	0	0	0	0
AC196278.2_FG003	4:208395843-208488216	3867	-	13.4068	8.21929	16.819	10.3448	15.13	13.159	15.5462	7.90785
AC196278.2_FG005	4:208411175-208412665	1350	+	0.047565	0	0.0375678	0	0.0434613	0	0	0
AC196290.3_FG007	10:88604310-88606148	1839	-	0.132887	0.0683924	0.0524743	0.083777	0.151961	0.124905	0.0800669	0.0840324
AC196394.3_FG002	1:16626949-16628169	709	+	2.09124	2.14859	0.08658	0.516572	1.59374	1.92168	0	0
AC196395.3_FG001	2:174290291-174291667	807	-	0	0	0	0	0	0	0	0
AC196412.3_FG001	4:35272649-35274211	1563	+	0	0	0	0	0.0366049	0	0	0
AC196417.3_FG008	3:155345465-155346046	482	+	68.2631	134.656	670.606	80.2998	229.494	108.524	981.987	20.0222
AC196420.4_FG002	2:71240820-71245131	729	-	0	0	0.0831935	0	0	0	0	0
AC196426.3_FG007	8:139014159-139021807	3090	-	58.9896	48.3347	38.8239	61.5577	52.8384	62.2647	55.9292	62.5099
AC196431.2_FG001	4:44134084-44143261	456	+	0	0	0	0	0	0	0	0
AC196432.3_FG007	5:24212056-24212901	846	-	0	0	0	0	0	0	0	0
AC196436.3_FG002	7:75748131-75748583	453	-	0	0	0	0	0	0	0	0
AC196437.3_FG001	9:36414909-36422631	1113	+	0	0	0	0.075827	0	0.075371	0	0
AC196439.3_FG002	10:107148061-107153897	2433	+	2.51088	0.166942	0	0.0311506	0	0.395063	0.0595214	0.123026
AC196465.3_FG002	8:149888154-149888780	627	+	5.39232	4.34625	3.94913	6.62782	3.81854	7.41222	3.82811	8.80165
AC196465.3_FG006	8:149891564-149920568	6834	+	12.3327	8.00362	10.2248	9.83762	10.7092	12.6061	11.8592	7.88448
AC196470.3_FG007	8:13441603-13442061	459	-	0	0.230961	0	0.280693	0.200766	0.558141	0.362715	0
AC196475.3_FG004	4:32249373-32251536	1095	-	116.313	391.286	329.893	241.333	224.994	257.849	316.799	190.989
AC196475.3_FG005	4:32242938-32246208	2337	+	66.767	64.5103	65.7454	76.8665	70.455	90.7512	84.4363	77.7919	NAC
AC196488.3_FG007	6:133675929-133704943	1059	+	0	0	0	0	0	0.16041	0	0
AC196489.3_FG002	2:63943718-63944981	501	-	40.4932	36.617	128.946	65.939	110.563	106.105	81.5138	31.9431
AC196502.3_FG003	6:83967924-83970319	975	-	0.284433	0	0	0	0	0	0	0.0898765
AC196575.3_FG007	5:190432845-190434712	723	-	0	0	0.336725	0	0	0	0.0860064	0.134593
AC196637.2_FG002	3:170538931-170540493	1563	-	0	0	0	0	0	0	0.539445	0
AC196642.4_FG003	6:150409955-150411050	753	+	0	0	0	0	0	0	0	0
AC196708.3_FG006	4:237687877-237688275	399	+	3.2629	2.77216	2.8152	4.85026	4.77843	4.45292	1.21223	3.36187
AC196709.3_FG001	5:53279277-53279618	342	+	0	0	0	0	0	0	0	0
AC196710.3_FG013	2:232890803-232891213	411	-	0	0	0	3.85084	1.49636	2.78498	0	1.75248
AC196714.3_FG004	10:50609263-50614429	822	-	0	0.0918862	0	0	0	0	0	0
AC196719.3_FG002	2:103500310-103500681	372	+	2.09054	2.17458	0.275642	0.875565	0.620993	0.871424	0.28576	1.3152
AC196726.2_FG001	7:139525994-139526248	255	+	0	3.06686	5.67278	1.75198	0	1.76445	3.76829	3.52772
AC196728.3_FG003	5:136772293-136772727	435	-	0	0	0	0	0	0	0	0
AC196779.3_FG003	6:69566698-69567925	900	+	1.73626	2.11534	1.18454	1.59155	1.07883	1.48315	2.41644	1.79529
AC196780.4_FG003	3:182132070-182132336	267	+	0	0	0	0	0	0	0.935441	0
AC196789.3_FG001	1:31048533-31050042	1200	+	0	0	0	0	0	0	0	0
AC196795.4_FG009	6:14001935-14026225	2219	-	0.0723339	0.0359461	0.0319037	0.046353	0.0338224	0	0	0
AC196954.2_FG012	2:8060365-8061161	594	-	0	0	0.226075	0	0	0	0	0
AC196956.3_FG003	7:78360556-78363204	1047	+	0	0.0669276	0.0564853	0.0819162	0	0.0813644	0	0.0820994
AC196957.3_FG005	1:181633452-181635532	582	-	0	0	0	0	0	0	0	0
AC196961.2_FG003	7:148082947-148083258	312	+	61.7276	43.5787	135.603	53.2426	84.3506	92.2776	125.546	84.978
AC196961.2_FG004	7:148131600-148133719	474	-	0.209934	0	0	0	0	0	0	0
AC196972.3_FG009	4:228134466-228134927	462	+	0	0	0	0	0	0	0	0
AC196974.3_FG008	4:6165232-6165982	693	-	0	0	0.536966	0	0	0	0	0
AC196978.5_FG002	10:4585490-4586176	687	+	0	0	0	0	0	0	0	0
AC196978.5_FG007	10:4516274-4517728	696	-	0	0	0	0	0	0	0	0
AC196984.3_FG001	3:130775160-130776129	693	+	0	0	0	0	0	0	0	0
AC197013.3_FG003	7:158996167-159034575	5990	-	72.0265	115.645	69.8079	53.7657	58.8324	57.4054	68.6654	66.9951
AC197021.3_FG004	8:126620838-126621472	552	+	0	0.332852	0	0.405569	0	0	0	0
AC197029.3_FG001	7:105651526-105651740	153	-	0	0	0	0	0	0	0	0
AC197029.3_FG003	7:105497941-105508767	2685	-	13.504	11.8246	4.06377	3.23809	7.28032	11.2668	10.0976	14.6648
AC197038.3_FG001	7:74808342-74808874	432	+	0	0	0	0	0	0	0	0
AC197041.3_FG001	6:7322954-7323736	783	+	0	0	0	0	0	0	0	0
AC197047.3_FG001	4:75974913-75975576	558	+	0.316324	0.817394	0.999959	1.79295	0.286367	0	0.384301	0.199623
AC197054.3_FG002	1:268542490-268543005	516	+	0	0	0	0	0.163019	0	0	0
AC197055.3_FG003	3:202046554-202049599	2403	-	0	0	0	0	0	0	0	0
AC197056.3_FG002	2:75431988-75432446	459	+	0	1.38576	1.05763	0.280693	0.401531	0.279071	0.362715	0.28112
AC197056.3_FG005	2:75419239-75423605	1665	-	11.2017	18.6577	14.0491	13.9827	13.4434	11.4263	14.5935	17.79
AC197082.3_FG004	1:260678255-260679745	1419	-	0	0	0	0	0	0	0	0
AC197082.3_FG005	1:260664972-260665855	846	-	0	0	0	0	0	0	0	0
AC197109.3_FG004	5:45176321-45179241	723	-	0	0	0	0	0	0	0	0
AC197118.3_FG005	5:78820119-78821393	1275	-	13.8551	13.1682	12.7135	12.6508	11.586	10.9788	14.8716	11.335
AC197122.3_FG003	5:15703439-15731473	3239	+	10.3193	12.6859	11.5021	13.88	13.4228	14.0653	16.8077	11.886
AC197124.3_FG002	6:111915197-111916292	327	+	0	0	0	0	0	0	0	0
AC197124.3_FG004	6:111923570-111924656	213	-	0	0	0	0	0	0	0	0
AC197140.2_FG001	6:95136851-95137279	429	+	0	0	0	0	0	0	0	0
AC197143.3_FG007	6:168364504-168365274	771	-	0	0	0	0	0	0	0	0
AC197143.3_FG010	6:168338666-168339076	411	-	0	0	0	0	0	0	0	0
AC197145.4_FG001	4:64492631-64492852	222	+	4.96625	5.63651	0	0	0	0	0	6.10568
AC197146.3_FG001	10:2480007-2481833	1827	-	6.22531	1.37806	4.94293	3.41826	4.74581	8.38906	6.31877	4.99485
AC197146.3_FG002	10:2466640-2467603	870	+	0.660392	1.53197	0.912958	0.832333	0.902466	0.723935	2.19547	1.56476	MYB
AC197150.3_FG003	3:87780430-87782664	2235	+	0	0	0.00898527	0.101006	0.0244405	0.0669295	0.477766	0
AC197164.4_FG002	5:59129109-59131618	954	-	0	0.0753805	0	0	0	0.0916318	0	0
AC197230.3_FG001	3:19090340-19092503	507	+	0	0.192445	0	0	0	0	0	0
AC197242.3_FG001	2:196728267-196728623	357	+	0	0	0	0	0	0	0	0
AC197246.3_FG001	1:192101696-192103976	651	-	13.7907	14.1099	22.9714	15.0273	18.1597	15.5607	15.344	21.0241
AC197246.3_FG003	1:191987674-191990586	565	+	242.23	94.9936	246.544	133.524	212.751	204.918	200.917	212.584
AC197265.3_FG005	5:83145879-83146355	477	+	0.415017	0	0.49211	0.522531	0.561258	0.519499	1.68612	0.261694
AC197267.3_FG001	9:50807898-50808182	285	+	0	2.52329	0	0	0	0	0	0
AC197274.4_FG010	4:180264138-180264831	465	-	5.22155	6.30906	7.22382	4.10856	7.64356	2.72318	9.9064	7.40694
AC197340.3_FG003	2:41965482-41965856	168	+	135.029	323.368	2577.45	2248.76	1033.88	408.132	1591.58	335.67
AC197340.3_FG004	2:41994604-41996093	747	-	0	0	0	0	0	0	0	0
AC197347.3_FG003	5:54965242-54966073	453	+	0	0	0	0	0	0	0	0
AC197355.3_FG001	5:104969846-104970052	207	+	25.9729	30.7173	203.216	84.766	46.0435	35.2257	110.021	15.0767
AC197373.4_FG005	3:41194732-41194944	213	-	0	0	0	0	0	0	0	0
AC197376.3_FG001	6:115717836-115718719	750	-	0	0	0	0	0	0	0	0
AC197377.3_FG001	4:43119843-43120620	645	-	0.881886	1.95119	0.796376	2.9696	5.34311	6.11492	0.101824	1.27274
AC197377.3_FG004	4:43177947-43182953	2125	+	0.784711	0.12407	0.942743	1.28031	1.24415	0.934479	0.639578	1.41579
AC197387.3_FG004	1:63919534-63919998	465	+	4.8129	11.1425	0.0222387	7.30801	0.370507	3.04462	0	0
AC197427.3_FG003	4:206165635-206169362	1011	+	0	0	0	0	0	2.89182	0	0
AC197432.4_FG001	1:185554731-185555657	927	-	3.26448	1.72163	1.4393	1.62672	0.276813	0.475582	1.40666	2.20681
AC197477.3_FG002	7:157938479-157939946	375	+	0	0	0	0	0	0	0	0
AC197526.3_FG003	3:61348118-61349965	774	+	0	0	0	0	0	0	0	0
AC197541.3_FG009	3:169034338-169035344	246	+	0	1.99676	0	0	0	0	0	0
AC197544.3_FG002	7:176475673-176480528	1581	+	0	0	0	0	0	0	0	0
AC197545.3_FG002	1:27388401-27407231	3540	-	20.3982	15.923	21.6587	15.724	20.8276	17.406	20.0364	16.1145
AC197555.3_FG008	3:227494431-227495354	924	+	30.3469	19.2695	10.5521	6.48202	21.529	14.3136	14.2751	14.202
AC197575.3_FG008	2:32496378-32499262	546	+	1.87755	0.188487	2.42826	2.36472	2.16029	0.82109	0	0.22992
AC197577.2_FG002	10:120742951-120743556	495	+	0	0	0	0	0	0	0	0
AC197578.4_FG001	3:192774263-192788216	4718	-	23.6314	29.9229	22.6933	28.8999	18.0108	18.0189	24.1054	21.9186
AC197583.2_FG003	10:69074508-69075194	687	+	0	0	0	0	0	0	0	0
AC197595.3_FG001	3:124134487-124134855	369	-	0	0	0	0	0	0	0	0
AC197672.3_FG002	10:98133251-98154669	7807	+	31.4592	43.9384	23.5851	34.8715	34.7804	28.8314	32.4101	25.9496
AC197697.3_FG001	2:76361430-76362131	702	+	0	0	0	0	0	0	0	0
AC197699.3_FG002	9:17002567-17006457	1947	-	0.0934419	0.128235	0.221387	0.196368	0.199496	0.156143	0.100076	0.078788
AC197699.3_FG003	9:16996583-17001284	2086	+	5.04532	5.93434	4.25873	4.25569	4.116	4.37205	4.86403	4.77691
AC197699.3_FG005	9:17088257-17088583	327	+	0	0	0	0	0.432851	1.84173	0	0
AC197699.3_FG006	9:17071571-17083299	1872	-	0.325591	0.301621	0.359993	0.451586	0.26809	0.122414	0.183089	0.494144
AC197699.3_FG008	9:17056140-17058782	1839	+	0.0332217	0.170981	2.63797	2.49227	0	0	0.240201	0.378146
AC197699.3_FG009	9:17048925-17049254	330	+	0	0	0	0	0	0	0	0
AC197699.3_FG010	9:17045708-17046031	324	+	0	0	0	2.78626	0	0	0	0
AC197705.4_FG001	8:118165588-118167724	1830	+	164.764	48.8299	84.3748	97.3024	164.787	113.042	115.458	314.048
AC197705.4_FG003	8:118102992-118103722	649	-	9.24031	153.555	5.28158	176.034	12.7068	13.3932	5.37915	18.6183
AC197705.4_FG004	8:118105128-118105649	522	+	0	0	0	0	0	0	0	0
AC197705.4_FG006	8:118186657-118188309	1653	+	13.6411	12.2299	5.3356	8.94277	7.67309	7.53724	7.69224	10.7504
AC197705.4_FG007	8:118191151-118195242	1929	-	52.2702	39.6949	66.6965	42.7546	47.2386	39.0755	50.651	37.7957
AC197705.4_FG008	8:118195750-118197099	1350	+	0	0	0.0375678	0	0	0	0	0
AC197705.4_FG011	8:118078199-118090973	3148	+	2.04878	1.62065	2.95909	2.26433	5.64628	2.38468	5.01546	5.23128
AC197714.3_FG004	4:58534571-58535627	372	+	1.04531	2.53701	1.92949	1.31349	1.68127	3.48586	0.916735	0.903563
AC197717.3_FG002	9:146815337-146818566	1576	+	125.674	105.686	99.6516	103.873	156.925	138.049	97.8041	80.7259
AC197718.3_FG002	3:160307371-160307976	351	+	0	0	0	0	0	0	0	0
AC197738.3_FG007	1:291482370-291482798	429	+	0	0	0	0	0	0	0	0
AC197757.3_FG002	4:25341927-25342184	258	-	0	0	0	0	0	0	0	0
AC197757.3_FG003	4:25344294-25344770	477	-	0	0	0	0	0.187086	0	0	0.261694
AC197758.3_FG004	4:183929142-183944284	1269	+	0.495265	0.582727	2.34337	0.259644	6.11054	0.768149	6.30026	1.58981
AC197764.4_FG003	5:36832340-36833181	597	+	0	0.733023	0.448575	0.893873	0	0	0	0.179162
AC197770.3_FG002	10:96008889-96009503	615	+	0	0	0.107063	0	0	0	0.109574	0
AC197771.3_FG001	10:78600700-78601182	483	-	0.405642	0.419902	0.641309	0.255374	0.548793	0.25389	0.823762	0.511605
AC197783.3_FG005	4:199912945-199915442	573	+	0	0.156548	0	0	0	0	0	0
AC197835.3_FG001	1:266820647-266821141	495	-	0	0	0	0	0	0	0	0
AC197837.3_FG003	9:91425959-91426732	774	-	0	0	0	0	0	0	0	0
AC197901.3_FG003	9:118759325-118759666	342	+	0	0	0	0	0	0	0	0
AC197903.4_FG001	3:7933844-7934666	309	+	0	0	0	0	0	0	0	0
AC197909.3_FG002	6:66001512-66003004	780	-	0	0	0	0	0	0	0	0
AC198019.2_FG004	9:71375909-71376280	372	+	0	0	0	0	0	1.30714	0.857279	0.876802
AC198025.3_FG001	7:44572937-44573503	567	+	0.308182	0.159249	0	0.38819	0	0.385908	0.499078	0.388995
AC198081.2_FG001	7:110045075-110045575	501	+	0	0	0	0	0	0	0	0
AC198081.2_FG005	7:110105306-110105671	366	+	0	0	0	0	0	0	0	0	C2H2
AC198122.3_FG002	9:69864467-69868239	957	+	0	0	0	0	0	0	0	0
AC198169.4_FG004	5:188388613-188394059	2453	-	22.2079	24.5173	17.0213	26.3498	18.2746	14.9774	18.0792	19.6893
AC198174.4_FG001	5:198996188-198998115	1779	-	0.103494	0.0710231	0.0272454	0	0.0631131	0.0432343	0.0277167	0
AC198179.4_FG001	6:35314651-35316707	1572	-	0	0	0	0.0501422	0	0	0	0
AC198179.4_FG002	6:35349209-35350202	900	-	0	0	0	0	0	0	0	0
AC198206.5_FG001	5:128454834-128463337	1752	+	2.10631	1.62617	1.74667	0.929514	1.95872	0.527937	1.5513	1.59828
AC198208.3_FG002	10:21677140-21677637	498	-	0	0	0	0	0	0	0	0
AC198223.3_FG001	2:134849982-134850296	315	-	0	0	0	0	0	0	0.458788	0
AC198229.4_FG002	2:80590389-80591365	705	+	0.110482	0.114015	0.174581	0.139215	0	0	0	0.279105
AC198230.4_FG003	8:50354076-50354568	237	-	0	0	0	0	0	0	0	0
AC198291.3_FG001	6:35990568-36001507	633	+	0	0.267702	0.204846	0	0	0.32468	0.419153	0.163677
AC198324.3_FG003	4:134452719-134454437	1719	-	0.0358766	0	0	0.497585	0.0328136	0.359691	0.0288268	0.22686
AC198352.4_FG005	6:12868084-12868566	483	-	0	0	0	0	0	0	0	0
AC198353.5_FG001	2:188791940-188794503	1488	+	0	0	0	0	0	0	0	0
AC198353.5_FG004	2:188770909-188785318	2636	+	5.27964	5.79724	5.79553	6.55135	4.06777	4.35409	5.83145	3.69988
AC198357.3_FG002	7:85342627-85343638	531	+	0	0	0	0.216344	0	0	0	0
AC198361.3_FG004	1:233326649-233331818	2937	-	61.8495	36.9834	37.1518	42.8348	47.8826	59.5707	45.1295	62.2702
AC198366.3_FG004	10:1887926-1889446	1521	+	0	0	0	0	0.00386704	4.00249e-05	0	0.000100072	GRAS
AC198371.3_FG003	10:5912898-5913966	759	+	0	1.0261	0	1.50416	0.0904897	0	0	2.51323
AC198371.3_FG011	10:5880437-5880796	360	+	0	0	0	0	0	0	0	0.475061
AC198379.3_FG006	7:103922458-103925324	534	-	0	0	0	0	0	0	0	0
AC198380.3_FG001	7:101875286-101876777	1258	+	0.673012	1.38636	1.10403	0.522126	1.37132	0.778478	0.832803	0.785463
AC198382.3_FG001	10:20639741-20640673	660	+	0	0	0	0	0	0	0	0
AC198386.3_FG001	3:83259349-83259807	459	+	0	0.230961	0	0	0	0	0	0
AC198393.3_FG001	7:71680218-71680841	624	+	0	0	0	0	0	0	0.107128	0
AC198398.3_FG003	10:7584351-7585733	1383	+	0	0	0	0	0	0.0579178	0	0
AC198403.3_FG001	4:10900952-10901590	639	-	0	0	0	0	0	0	0	0	ERF
AC198414.2_FG001	9:63895726-63896088	363	+	0	0	0	0	0	0	0	0
AC198418.3_FG005	1:295106808-295189877	2632	+	3.07695	4.40027	3.37505	5.22202	5.4304	7.50279	3.2013	3.43609
AC198421.3_FG003	10:23186708-23187466	666	-	0	0	0	0	0.21812	0.328234	0	0
AC198479.3_FG007	7:118085335-118086665	606	-	0	0.286387	0	0	0	0	0	0
AC198481.3_FG004	7:170099653-170103818	2806	+	55.9646	50.6203	51.4073	67.2091	64.6631	61.0681	51.4111	48.8876
AC198490.3_FG003	8:106277379-106278861	782	+	0.477087	0.0984165	0.15076	0.480978	0.260499	0.478174	0.307853	1.2055
AC198494.3_FG002	8:90063249-90064339	969	+	0.143352	0	0	0.451729	0	0	0	0
AC198506.3_FG001	10:124426808-124427944	1137	-	0	0	0	0	0	0.0734047	0	0	C2H2
AC198509.3_FG004	10:114812028-114812619	276	+	0	0	0	0	0	0	0	0
AC198509.3_FG005	10:114831966-114833427	990	+	0	0	0	0	0	0	0	0
AC198510.5_FG002	8:66676943-66677404	462	+	0	0	0	0	0	0	0	0
AC198515.3_FG011	10:140268585-140271261	2214	+	0	0	0	0	0.024697	0	0	0
AC198518.3_FG002	3:107406722-107407300	579	-	0.148977	0.923629	0.588651	1.31364	0.809831	1.49246	0.361766	1.88059
AC198518.3_FG003	3:107351215-107363513	1476	+	34.8993	32.4094	30.5213	30.5595	30.8887	27.0128	27.2697	24.8046
AC198518.3_FG005	3:107371837-107373182	915	-	0	0	0.061003	0.0973346	0.0703858	0.193503	0	0	bHLH
AC198597.4_FG001	7:136797350-136797961	612	+	0	0	0	0	0	0	0	0
AC198605.3_FG005	10:99609255-99610412	411	-	0	0	0	0	0	0	0	0
AC198691.3_FG005	3:201865800-201867489	927	+	0	0	0	0	0	0	0	0
AC198699.3_FG004	10:18733971-18739694	1527	+	0	0.0423541	0	0	0	0	0	0
AC198700.2_FG004	2:220646372-220647259	888	-	0.404358	0	6.84789	0.374585	1.75933	0.929601	6.94705	0.55052
AC198721.3_FG002	10:12413747-12416077	1854	+	0	0	0	0	0	0	0	0
AC198723.4_FG002	7:103621612-103622974	939	+	0	0	0	0	0	0	0	0
AC198723.4_FG003	7:103604973-103606253	837	-	0	0	0	0	0	0	0	0
AC198725.4_FG004	3:217292977-217294257	1281	+	0	0.208666	0.200028	0.12771	0.138806	0.380821	0.285157	0.384244
AC198725.4_FG007	3:217230993-217244458	3690	-	10.1503	12.2352	18.4124	8.2706	15.802	9.72868	12.3386	8.08601
AC198725.4_FG009	3:217212884-217215223	1059	-	0	0.131912	0.0505618	0	0	0	0.051527	0	WRKY
AC198743.3_FG008	4:25624497-25628326	1215	-	0	0	0.895714	0.204233	0.641106	0.676676	0	0
AC198744.3_FG004	10:3058733-3060600	939	-	0	0	0.0589733	0	0	0.187071	0	0
AC198752.4_FG004	4:113104282-113105150	420	+	0	0	0.21025	1.00376	0.238559	0.665377	0.216877	0
AC198766.3_FG005	5:153481426-153482373	948	-	0	0	0	0	0	0	0	0
AC198773.3_FG003	10:14540796-14543332	1311	+	0	0	0	0	0	0	0	0
AC198781.3_FG002	10:5279773-5279997	225	+	0	0	0	0	0	0	0	0
AC198787.3_FG001	10:85763686-85764108	423	-	0	0	0	0	0	0	0	0.330127
AC198787.3_FG004	10:85830134-85830556	423	+	0	0	0	0	0	0	0	0.330127
AC198787.3_FG009	10:85699124-85699848	507	-	0	0.192445	0.147028	0.468488	0.50402	0	0	0
AC198871.3_FG002	1:202410121-202412988	2337	+	0.0254164	0.0261551	0.0200719	0	0	0	0	0
AC198901.4_FG004	7:41470202-41471403	558	-	1.10714	1.47131	0.124995	0.199217	0	0.594141	0.512401	0.798493
AC198923.4_FG002	8:159395009-159395473	465	-	0	0	0	0	0	0	0	0
AC198937.4_FG003	4:83615531-83617710	855	-	0.337964	0	0.133492	0	0.461773	0.211702	0.40862	0.213536
AC198937.4_FG005	4:83571704-83573094	1146	+	0	0	0	0	0	0	0	0	NAC
AC198940.4_FG008	2:218813640-218815132	774	+	0	0	0	0	0	0	0	0
AC198979.4_FG009	1:10989531-10989923	393	+	0	0	0	0	0	0	0	0	ERF
AC198981.4_FG001	2:175844677-175846212	1089	-	0	0	0	0	0	0	0	0
AC198982.3_FG006	8:146463129-146473100	1969	+	13.0054	11.045	10.4127	9.86022	9.1372	14.3727	9.58264	13.1446
AC198993.3_FG004	4:85278900-85281279	879	-	0	0	0	0	0	0	0	0
AC198995.3_FG003	1:108068610-108069294	228	-	0	0	0	0	0	0	0	0
AC199001.3_FG005	8:134900966-134904951	1858	+	44.9184	42.1274	23.2576	35.9722	38.7749	53.0926	43.5956	32.8933
AC199005.2_FG003	5:211122180-211122527	348	-	0	0	0	0	0	0	0	0
AC199039.3_FG003	8:135455108-135456085	978	+	0.637451	5.10975	0.67138	2.7676	0.516725	1.50861	0.912632	1.16379
AC199043.2_FG002	8:68933977-68934234	258	+	0	0	0	1.62839	0	0	0	0
AC199054.3_FG003	9:120797398-120798158	570	+	0	0	0	0	0	0	0.123718	0
AC199054.3_FG007	9:120883718-120884155	438	-	0	0	0.193073	0	0	0	0	0
AC199058.2_FG001	10:19588511-19590481	408	+	6.78293	9.38682	3.35259	4.97787	5.06454	6.71823	8.07746	5.69578
AC199067.2_FG004	3:176451543-176452178	636	+	4.24685	4.3853	3.76248	1.94564	3.15337	4.51298	3.95318	2.92511
AC199068.2_FG017	2:235330642-235331598	957	-	0	0	0.115075	0.183621	0.265653	0.0912603	0	0
AC199084.3_FG004	7:112295058-112295198	141	+	0	0	0	0	0	0	0	0
AC199175.2_FG003	1:243108030-243112602	1011	-	0.0678827	0.349771	0	0	0	0	0.0546572	0.171608
AC199175.2_FG006	1:243158766-243159620	288	-	0	0	0	0	0	0	0	0
AC199182.3_FG003	2:98056083-98056631	549	-	0	0	0	0	0	0	0	0
AC199183.3_FG001	10:90901202-90906852	1398	-	0	0	0	0	0	0	0	0
AC199194.3_FG002	8:49272838-49273518	681	+	0	0	0	0	0	0	0	0
AC199198.3_FG002	1:67196531-67196884	354	+	0	0	0	0	0	0	0	0
AC199198.3_FG003	1:67186673-67187026	354	+	0.394324	0	0	0	0	0	0	0
AC199204.3_FG002	8:36215489-36216358	711	+	0.109139	0	0.086229	0	0.69446	0.683534	0.0881121	0.137859
AC199217.3_FG004	8:120316735-120317097	363	+	0	0	0	0	0	0	0	0
AC199315.4_FG001	8:138225306-138225551	246	+	129.488	91.009	0.313182	99.7603	39.4292	9.7694	0	7.56142
AC199315.4_FG002	8:138255217-138255384	168	+	675.146	215.579	0	149.917	0	0	0	134.268
AC199325.3_FG001	10:19102222-19105332	1467	-	0	0	0	0	0	0	0	0
AC199325.3_FG005	10:19201866-19204358	684	-	0	0	0	0	0	0	0	0
AC199335.3_FG002	10:58273872-58299154	726	-	0	0	0	0	0	0	0	0
AC199343.3_FG013	2:6201357-6202631	1275	-	0.050938	0	0	0	0	0	0	0
AC199355.3_FG004	10:117215695-117217135	1029	-	0	0.0683994	0	0	0.0605546	0.0831681	0	0
AC199363.4_FG003	8:84943640-84987722	5280	+	11.3601	13.7594	6.06598	11.3638	8.32724	10.4891	9.25151	11.5596
AC199370.4_FG006	10:136742880-136743326	447	-	0	0	0	0	0	0	0.190981	0
AC199379.4_FG001	8:101141998-101143439	792	+	0	0	0	0	0	0	0	0
AC199379.4_FG008	8:101119483-101119866	384	-	0	0	0	0	0	0	0	0
AC199382.3_FG005	10:136339578-136340304	477	+	0.207508	0.214837	1.14826	1.30633	3.18046	0.519499	0.674448	2.09355
AC199384.3_FG002	7:76570565-76571020	456	+	0	0.701698	0.178687	1.42108	0.40653	1.97802	0.734702	0.56928
AC199421.3_FG001	1:247168661-247169113	453	+	0	0	0	0	0	0	0	0
AC199439.4_FG005	8:145687358-145693572	2040	+	0.29558	0.121685	0.140059	0.149081	0.216391	0.259311	0.0949602	0.0373849
AC199479.4_FG004	5:164065739-164067582	1038	-	0	0	0	0	0	0	0	0
AC199481.3_FG001	4:48463880-48465797	1395	-	0	0	0.0361319	0	0	0	0	0
AC199487.4_FG002	1:165753224-165753469	246	+	1.83666	3.99352	0	0	2.95364	6.78189	3.32346	4.53805
AC199487.4_FG003	1:165812007-165812252	246	-	0	3.99352	1.47139	2.25326	0	4.52126	3.32346	4.53805
AC199488.4_FG003	1:165625766-165626011	246	-	0	0	0	0	0	0	0	0
AC199488.4_FG004	1:165646391-165646636	246	-	0	0	0	0	0	0	0	0
AC199492.3_FG001	8:149424319-149424606	288	-	0.762696	1.60893	1.20943	1.89942	0.657289	0.950876	0	0.953288
AC199517.4_FG001	3:51010516-51011256	741	+	0	0.106149	0	0	0	0	0	0
AC199517.4_FG006	3:51038248-51038988	741	+	0	0	0	0	0	0	0	0
AC199524.3_FG002	1:171068809-171069462	330	-	0	0	0	0	0	0	0	0
AC199526.5_FG001	3:58942313-58942903	471	-	0.84967	0.659866	0	0.267435	1.53147	0.531771	0.51797	0.535727
AC199526.5_FG002	3:58903687-58904871	1185	-	0	0	0	0	0	0	0	0
AC199526.5_FG003	3:58872305-58884154	2160	+	0.3994	2.01159	1.23223	3.75485	0.723353	1.29089	1.43155	1.47857
AC199541.4_FG001	1:78406032-78407587	1398	+	7.89419	6.3435	2.23448	0.575293	6.79728	5.26076	5.90673	5.88529
AC199541.4_FG002	1:78455635-78457190	1398	+	0	0	0.03604	0.115059	0	0	0	0
AC199541.4_FG004	1:78327323-78328878	1398	-	2.46408	2.34945	1.4416	0.345176	2.96078	1.71547	1.7977	1.67327
AC199541.4_FG007	1:78363842-78365263	1422	+	1.78888	1.98021	2.08399	0.78937	0.940088	0.784606	1.04269	0.961354
AC199543.4_FG004	9:42118081-42119627	1206	-	0	0	0	0	0	0	0	0
AC199554.2_FG003	3:177450126-177450299	174	-	0	0	0	0	0	0	0	0
AC199571.3_FG001	10:93227265-93232585	1911	-	5.60252	5.1153	1.36262	5.91111	1.54538	2.12542	2.57187	3.41253
AC199571.3_FG003	10:93224472-93226100	1143	-	0	0.0599685	0.183888	0.293483	0.106268	0	0.140502	0.0735832
AC199571.3_FG004	10:93222472-93225832	998	+	5.3309	5.5626	3.78267	6.39442	3.65576	3.20006	7.5392	1.88759	MYB_related
AC199572.3_FG005	4:182130327-182130572	246	+	0	0	0	0	0	0	0	0
AC199577.4_FG004	5:81863099-81863686	333	-	0	0	0	0	0	0	0	0
AC199624.4_FG007	7:2554871-2557423	954	-	0	0	0.231088	0.184369	0.133364	0.274895	0	0.0924357
AC199632.4_FG007	8:154705495-154707076	1545	+	0	0.125337	0	0	0.0371308	0.152557	0	0
AC199638.4_FG001	3:43850768-43852281	1026	+	0	0	0	0	0	0	0	0
AC199701.4_FG001	8:45864875-45866456	744	+	0	0	0	0	0	0	0	0
AC199703.3_FG003	10:34498823-34499338	516	+	0.72163	1.86611	0	1.59039	0	0.90347	0.292661	3.86949
AC199705.3_FG006	10:129917045-129918436	720	+	0	0	0	0	0	0	0	0
AC199705.3_FG008	10:129921291-129944499	3063	+	1.10656	3.2404	1.55864	1.43666	1.28428	1.27433	0.778819	2.25289
AC199728.4_FG006	5:164720069-164723196	2178	+	0	0	0	0	0	0	0	0
AC199765.4_FG008	2:26390080-26391570	1491	+	10.7031	7.30269	7.13169	9.26896	7.8313	12.0271	8.07116	13.3328
AC199768.4_FG008	2:223385480-223386289	507	+	0	0	0	0	0	0	0	0
AC199771.4_FG001	8:134116722-134117057	336	+	1.51249	3.05425	9.93186	1.8431	7.46269	0.000339045	1.64337	7.5706
AC199777.3_FG001	5:137261687-137262334	648	-	0	0	0.098853	0	0	0	0	0
AC199779.3_FG006	4:170806542-170807060	519	-	4.26824	10.4359	2.68228	1.57457	6.09065	4.59174	5.8201	3.12161
AC199782.5_FG001	2:194391400-194396368	2077	-	52.1125	24.2973	45.6642	32.5513	50.7316	40.2422	45.3685	58.6039
AC199782.5_FG002	2:194357938-194361751	1984	+	38.4641	31.0343	34.2946	30.0142	39.6015	33.3236	42.0216	32.3673
AC199782.5_FG003	2:194355584-194356615	1032	-	2.31465	2.11255	1.3582	1.83398	1.87032	1.90582	1.3843	1.75548	TCP
AC199790.4_FG013	8:141879096-141879617	522	+	0	0	0	0	0	0	0	0
AC199801.4_FG005	2:222657295-222669920	1248	-	0	0	0	0	0	0	0	0
AC199810.3_FG003	8:105979784-105980500	717	+	0	0	0	0	0	0	0	0
AC199820.4_FG006	2:209929767-209930804	725	-	2.86349	17.2553	48.4708	11.9717	12.5765	19.9818	47.2839	1.21649	MYB_related
AC199826.4_FG003	1:215528327-215529228	816	+	0.0899955	0	0.42658	0.34026	0.245815	0.112743	0.145132	0.227427
AC199843.4_FG007	8:13995879-13998521	2265	-	0	0	0	0	0	0	0.0422539	0
AC199857.4_FG004	10:54439902-54440399	498	+	0	0	0	0	0	0	0	0
AC199873.4_FG002	3:13991429-13992424	846	+	0	0	0	0	0	0	0	0
AC199875.3_FG002	10:109005801-109006046	246	+	0	0	0	2.25326	0	0	0	0
AC199893.4_FG002	1:229707414-229708112	699	+	0	0	0	0	0	0	0	0
AC199908.4_FG002	1:177148034-177150936	1011	+	0	0	0	0	0	0	0	0
AC199911.5_FG001	10:72978056-72978856	801	-	0.0923085	1.14243	0.2917	3.37365	0.672224	0.462554	0.0744425	0.233264
AC199918.4_FG003	8:137725721-137729761	546	+	0	0	0	0	0	0	0	0
AC199932.4_FG002	1:117893133-117893584	357	-	0	0	0	0	0	0	0	0
AC199956.4_FG003	8:41131585-41132148	564	-	0.310849	0	0	0.195773	0.140737	0	0.12586	0
AC199961.4_FG001	10:146760294-146766983	2224	+	0.268476	0.0934187	2.33228	2.09891	1.62191	1.51417	0.0646781	0.4075
AC199961.4_FG004	10:146741183-146747035	2430	+	0.0730442	0.0250548	0	0.0307022	0	0.0305214	0.019549	0
AC200038.4_FG011	1:21603261-21604413	1020	-	0	0	0	0	0	0	0	0	ERF
AC200045.3_FG006	10:106101674-106104157	2484	-	0	0	0.01877	0.0599509	0.021761	0	0	0
AC200047.3_FG004	10:87566629-87566997	369	-	0	0	0	0	0	0	0	0
AC200057.4_FG006	7:140692511-140694474	804	-	0	0	0	0	0	0	0	0
AC200057.4_FG007	7:140686338-140691778	1786	+	13.9095	11.5954	10.6431	13.1215	10.6571	12.675	10.7603	12.4159	bZIP
AC200065.5_FG009	4:173562120-173562575	456	-	0	0	0	0	0	0	0	0
AC200069.4_FG002	10:115937512-115938106	240	+	2.24338	0	1.80876	0	1.77534	0	6.22875	0
AC200099.4_FG003	8:27665226-27665378	153	+	0	0	0	0	0	0	0	0
AC200099.4_FG006	8:27653407-27654504	1098	+	0	0.189087	0.0483219	0	0.0558343	0	0	0
AC200106.4_FG003	7:99530859-99531401	543	-	0	0	0	0	0	0	0	0
AC200112.4_FG007	2:142045960-142047088	651	-	0.124241	0	0	0	0	0	0	0
AC200112.4_FG008	2:142049730-142092840	1413	+	0	0	0	0	0	0	0	0
AC200117.3_FG004	4:240833037-240833978	759	-	0	0	0	0	0	0	0	0
AC200122.4_FG004	6:103355554-103356303	483	+	0	0	0	0	0	0	0	0.511605
AC200124.3_FG005	6:62747476-62747811	336	-	0	0	0	0	0	0	0	0	GRAS
AC200138.3_FG003	1:149092965-149095013	390	-	0	0	0	0	0	0	0	0
AC200143.3_FG003	7:159174311-159175104	333	+	0	0	0	0	0	0	0	0
AC200171.2_FG001	7:49157382-49158074	693	+	0	0	0	0	0	0	0	0
AC200178.2_FG002	2:93935857-93936387	531	-	0.75357	0.177634	0.271532	0.216344	0.310668	0	0	0.650283
AC200178.2_FG003	2:93928298-93928768	471	-	0	0	0	0	0	0	0	0
AC200207.2_FG001	1:131602063-131602836	735	-	3.43459	1.18122	1.23343	1.83615	5.77357	4.56305	2.93996	1.84069
AC200209.1_FG001	UNKNOWN:5433681-5435940	1326	+	1.12181	1.101	0.593338	0.918962	0.665975	0.304473	0.898794	0.552989
AC200210.1_FG006	3:225906457-225927850	3713	-	29.7119	24.5852	14.1175	26.6994	23.2539	27.6925	20.365	40.7201
AC200215.3_FG002	5:158043176-158045732	1149	+	0.173482	0.119144	0	0.145796	0.0527926	0	0	0
AC200225.5_FG001	10:52757082-52757598	240	+	0	0	0	0	0	0	0	0
AC200228.4_FG001	1:107022498-107024357	693	-	0	0	0	0	0	0	0	0
AC200234.3_FG001	4:81661633-81663602	582	+	0	0	0	0	0	0	0	0
AC200234.3_FG006	4:81737248-81741481	1257	-	0	0	0	0	0	0	0	0
AC200240.3_FG002	8:131226020-131226756	693	+	0	0	0	0	0	0	0	0
AC200256.3_FG003	1:234939755-234940706	654	+	0	0	0	0	0	0	0	0
AC200287.4_FG006	6:86042427-86047290	1134	-	0.587736	0.847684	0.232121	0.444547	0.214613	0.926937	0.567541	1.33742
AC200298.4_FG001	3:55444648-55445684	717	+	0	0	0.0851928	0	0.0980279	0	0.0870465	0
AC200490.3_FG005	3:32093905-32096979	3015	-	0	0	0	0	0	0	0	0
AC200495.3_FG001	2:218944708-218945400	693	-	0.226539	0	0.0894944	0.285448	0.102928	0.141877	0	0
AC200497.4_FG015	6:164814413-164817017	651	-	0	0	0	0	0	0	0	0
AC200535.4_FG002	3:161398282-161398716	435	+	0	0	0	0	0	0	0	0
AC200540.3_FG002	7:137113936-137115092	957	-	0	0	0.0575375	0.0918107	0.0664133	0	0	0
AC200565.4_FG001	8:95877707-95911197	549	+	0.487364	0.335879	0.641951	0.204616	0.44105	0.406832	0.65807	0.820106
AC200622.3_FG005	10:67233723-67235270	852	-	0	0	0	0	0	0	0	0
AC200627.3_FG005	1:274844539-274845270	732	-	0	0	0	0	0	0	0	0
AC200670.3_FG002	5:143821801-143822160	360	-	0	0	0	0	0	0	0	0
AC200725.4_FG003	3:19710401-19710859	459	-	0	0.692882	0.705088	0.842079	0.401531	0.558141	0.181357	0.562238
AC200725.4_FG008	3:19780795-19780947	153	-	0	0	0	0	0	0	0	0
AC200739.5_FG001	9:84498710-84499153	444	+	0	0	0	0	0	0	0	0
AC200753.3_FG003	7:7459649-7462861	3213	-	0	0	0	0	0	0	0	0
AC200754.4_FG004	1:220321677-220323654	1978	+	0	0.0373808	0.0573596	0.274697	0.111996	0	0.325976	0.0459213
AC200876.4_FG002	3:57245622-57246338	717	-	0	0	0	0	0	0	0	0
AC200876.4_FG003	3:57237787-57238800	1014	-	0	0	0.0534191	0.0852451	0	0.0847334	0	0
AC200881.4_FG002	1:217545957-217547054	843	-	0	0.0887931	0	0	0	0	0	0
AC200881.4_FG007	1:217655074-217656334	924	-	0	0	0	0	0	0	0	0
AC200884.4_FG002	8:128124567-128125892	489	-	0	0	0	0	0	0	0	0
AC200887.4_FG002	5:143514928-143515692	513	+	6.74281	5.27843	3.02486	5.27842	4.77481	5.70392	2.80883	9.42672
AC200904.3_FG003	3:33170529-33174333	1518	-	0	0	0	0	0	0	0	0
AC201740.3_FG003	9:118908308-118908703	396	-	0	0	0	0.379331	0	0	0	0	C2H2
AC201767.3_FG003	3:203145574-203146098	525	-	0	0	0	0.441114	0.158319	0	0	0
AC201769.3_FG002	6:45711013-45711324	312	+	3.98519	3.51325	3.60741	3.55952	2.98977	1.42159	4.265	0
AC201791.3_FG005	5:176788138-176790117	519	-	0	0	0	0	0	0	0	0
AC201797.4_FG006	1:273831613-273833305	507	+	0	0	0	0	0	0	0	0
AC201798.4_FG005	1:125793631-125793930	300	-	0	0	0	0	0	0	0	0
AC201815.4_FG001	5:47675016-47676908	1893	-	0.803777	0.794231	0.86331	1.01347	1.17662	1.36998	1.42049	1.38254
AC201828.3_FG002	2:151612962-151613498	537	+	0	0	0	0	0	0	0	0
AC201832.3_FG006	8:120046828-120048920	576	-	0	0	0	0	0	0.188117	0	0
AC201888.3_FG013	10:147062673-147066654	768	+	0	0	0	0	0	0	0	0
AC201891.3_FG001	4:99188200-99189273	249	-	0	0	0	0	0	0	0	0
AC201898.4_FG004	1:246687276-246687643	258	-	0	0	0	0	0	0	0	1.63899
AC201966.3_FG001	1:129729964-129730554	591	-	0	0	0	0	0	0	0	0
AC201969.4_FG005	6:64639687-64641072	999	+	0	0	0.0544446	0	0	0	0	0
AC201977.3_FG005	9:19220162-19220914	753	+	0	0	0.0794637	0	0.182995	0	0	0
AC201985.4_FG003	6:126651393-126651997	543	+	0.165448	0.342102	2.22289	3.75087	1.79626	2.0716	0.268131	0.835177
AC201986.3_FG002	4:9183034-9183546	513	-	0	0	0	0	0	0	0	0
AC201995.4_FG001	2:203223234-203225032	852	+	0	0	0	0	0	0	0	0
AC202000.4_FG006	10:13585147-13587788	936	+	0	0	0	0	0	0	0	0
AC202011.3_FG010	1:206340907-206341623	717	+	0.0109517	1.13779	0.221473	0.429543	0	0.40751	0.262822	0.148196
AC202015.3_FG004	UNKNOWN:6846299-6847555	696	-	0	0	0	0	0	0	0	0
AC202040.4_FG002	5:33929744-33931243	1281	-	0	0	0	0	0	0	0	0
AC202041.4_FG003	1:43507856-43508938	381	-	0.658517	0.342276	1.04182	0	0.293881	0.411803	0.809096	0
AC202069.3_FG002	9:132220813-132221793	909	+	0.233682	0	0	0	0	0	0.188277	0.0984423
AC202073.4_FG001	2:46524002-46537949	2608	-	3.36948	3.53898	2.3247	2.13881	2.12489	2.90467	2.29364	3.078
AC202076.3_FG009	5:214100297-214100599	303	+	0	0	0	0	0	0	0	0
AC202091.4_FG003	10:25675318-25676240	834	+	0	0	0	0.110111	0	0	0	0
AC202092.2_FG003	10:49504157-49504699	543	-	0	0	0	0	0	0	0	0
AC202101.3_FG002	1:42872324-42873262	939	+	0	0	0	0	0	0	0	0
AC202107.3_FG001	10:6529797-6530246	450	+	0	0.239966	1.4648	0.874597	0.833536	0.579701	0	0
AC202110.3_FG004	7:77920300-77924448	3111	+	0.0626725	1.1957e-05	1.79436	3.22892	0.907678	0.813002	0.903607	0.720507
AC202122.2_FG001	9:24268164-24268547	213	+	0	0	0	0	0	0	0	0
AC202129.3_FG001	7:17885176-17885535	360	-	0.755473	1.17992	0.29888	0.474314	0	0	0.310407	0
AC202139.3_FG008	3:41369747-41370580	834	+	0	0	0	0	0	0	0	0
AC202144.5_FG001	9:139943334-139945062	429	+	0	0	0	0	0.228627	0	0	0
AC202172.3_FG004	1:84738849-84739076	228	+	0	0	0	0	0	0	5.28593	0
AC202178.3_FG002	10:68004214-68004971	597	+	0	0	0.112144	0	0.514591	0.17772	0.229636	0.179162
AC202179.3_FG004	6:83637700-83639754	1323	+	0	0	0	0	0	0	0	0
AC202179.3_FG005	6:83633585-83635913	1794	+	0	0	0	0	0	0	0	0
AC202181.3_FG010	8:150964410-150965270	861	+	0	0	0.682368	0.660314	0.14873	0.104865	0	0
AC202185.4_FG004	1:122162694-122163480	627	+	0.52608	1.90149	18.0829	3.811	5.72781	4.77676	14.5681	2.6571
AC202187.4_FG003	4:87760413-87762207	1131	-	0	0	0	0	0	0.0738866	0	0
AC202384.4_FG009	2:211430066-211431078	894	-	0	0	0.566075	0.903182	0.0725557	2.09481	0	0
AC202391.4_FG002	7:15458376-15460243	1671	+	0.0741226	0.0381532	0.0585402	0.0467282	0	0	0.0595619	0
AC202396.4_FG010	5:23766360-23766972	582	+	0.147752	0	0.116761	0.18612	0.133875	0	0	0.186515
AC202417.5_FG002	7:126220716-126221012	297	+	0	0	0	0	0	0	0	0
AC202432.3_FG006	8:167199719-167203242	1453	+	0.917067	1.30655	1.01953	0.567284	0.981851	1.30438	1.75982	0.43453
AC202435.3_FG001	2:72206051-72207447	1161	-	0.0570919	0.470504	0.315663	0.359858	0.416996	0.286154	0.275619	0.0721771
AC202435.3_FG003	2:72129714-72134439	1527	+	0.0822728	0	0	0	0.150431	0.0515512	0.0330643	0.156058
AC202439.3_FG001	6:113720108-113720674	567	+	1.07864	2.22948	3.40969	2.13505	1.2559	0.964771	0.873387	0.583492
AC202439.3_FG006	6:113667684-113673549	2334	-	0.197167	0.392885	0.133466	0.142065	0.128893	0.530004	0.429794	0.0712503
AC202526.4_FG006	4:21564546-21565539	699	-	0	0	0	0	0	0	0	0
AC202532.4_FG006	7:175442272-175445867	879	-	0	0	0	0	0	0	0	0
AC202534.2_FG007	2:221581024-221581554	531	-	0	0	0	0	0	0	0	0
AC202549.3_FG008	8:29947077-29947613	537	+	0	0	0	0	0	0	0	0
AC202561.3_FG007	5:18637442-18638305	864	+	0	0	0	0	0	0	0	0
AC202567.4_FG004	5:155039021-155044232	2367	+	5.61683	2.21239	2.74022	4.26886	1.00329	2.67029	0.0866266	0.257536
AC202705.2_FG001	2:6715493-6716368	474	+	0	0	0	0	0	0	0	0
AC202707.3_FG002	4:49937683-49941888	1489	+	3.02137	4.32662	6.69207	2.99118	1.62656	1.75201	5.27853	1.99573
AC202855.3_FG004	4:195622459-195623127	669	+	0.119289	0.246278	0.942534	1.20241	0.541714	1.34469	0.578221	0.753274
AC202864.3_FG002	6:160545826-160547319	1149	-	1.44568	1.96588	2.23811	1.82246	1.58378	1.95641	2.18693	2.85113	GATA
AC202867.3_FG008	3:132330283-132330822	405	+	0	0	0	0	0	0	0	0
AC202867.3_FG010	3:132311673-132312323	651	+	0	0	0	0	0	0	0	0
AC202877.3_FG002	8:57909851-57911305	1113	-	0.0601517	0.0619714	0.0475123	0.379135	1.15298	0.678339	0	0.532291
AC202900.3_FG001	4:42633506-42634278	615	-	0	0.139938	0	0	0	0	0	0
AC202911.3_FG002	7:127731428-127732108	681	-	0.929609	0.11994	0.0918122	0	0.105566	0	0.469285	0
AC202915.3_FG002	8:128744739-128752754	1836	+	49.0692	41.6541	23.3817	34.887	24.038	28.0737	27.5996	33.4176
AC202921.3_FG004	3:178284933-178285403	471	+	0	0	0	0	0	0	0	0
AC202930.4_FG007	9:93915154-93915573	420	+	0	0	0	0	0	0	0	0
AC202930.4_FG008	9:93931745-93932565	294	-	0	0	0	0	0	0	0	0
AC202940.3_FG004	2:199455006-199455480	432	-	0	0	0	0	0	0	0	0
AC202950.3_FG008	5:1442023-1443366	1344	+	0	0	0	0.120571	0	0	0	0
AC202953.3_FG003	1:207175148-207175507	360	-	0	0	0	0	0	0	0	0
AC202959.3_FG001	3:78496767-78497681	915	+	0	0	0	0	0	0	0	0
AC202965.3_FG002	4:14847476-14849209	693	-	0	0	0	0	0	0	0	0
AC202974.3_FG004	5:1576579-1577232	654	-	0	0.127387	0.292481	0	0.336079	0.154539	0.0997077	0
AC202989.3_FG007	1:91796738-91805596	1008	+	0	0	0	0	0	0	0	0
AC202991.3_FG003	4:199556534-199557670	372	-	0	0	0	0	0	0	0	0
AC203001.3_FG001	4:64425372-64426121	750	-	0	0	0	0	0	0	0	0
AC203006.3_FG005	5:204055706-204056587	882	+	0	0	0	0	0	0	0	0
AC203019.3_FG001	1:262565832-262566592	720	-	0.643108	1.5484	0.508104	1.21558	0.292344	1.74539	0.51914	1.89553
AC203027.3_FG003	6:69148028-69151660	1092	+	0	0	0	0	0	0	0	0
AC203031.3_FG002	7:122346282-122346821	540	-	0.534604	0.594277	0	0	0.25025	0.649512	0	0.293483
AC203048.3_FG001	5:21213907-21217105	511	-	26.068	25.2134	6.52603	16.6167	21.5356	29.7588	31.9143	24.3983
AC203090.3_FG005	1:214988188-214993760	1135	-	3.72805	2.88742	3.34594	1.18418	1.87965	0.524323	3.25055	2.71458
AC203093.3_FG001	6:26715229-26722555	5884	+	0.591408	0.441024	0.493823	0.884488	0.736173	1.03065	0.731381	0.430204
AC203101.3_FG002	6:122113693-122114729	885	-	0	0	0	0	0	0	0.0650269	0
AC203148.3_FG005	8:113903105-113905061	582	-	0	0	0	0	0	0	0	0
AC203159.3_FG009	7:7520832-7521900	675	-	0	0	0	0	0	0	0.095097	0
AC203159.3_FG010	7:7523481-7524129	558	+	0	0	0	0.199217	0.143183	0	0.256201	0.399246
AC203173.3_FG001	8:175150778-175151936	984	-	0.140547	0.434542	0.610613	0.708633	0.961322	0.616334	0.169773	0.532935
AC203173.3_FG002	8:175185352-175188965	2376	-	0	0	0.0591278	0.0314701	0.0228475	0	0.0200388	0
AC203173.3_FG004	8:175215582-175220817	3068	-	414.46	218.563	287.851	274.496	563.25	477.783	480.401	469.308
AC203176.4_FG003	6:13427403-13428197	795	+	0.186535	0.384779	0.442097	0.11754	0.679152	0.584195	0	0.117841
AC203183.3_FG001	5:111688367-111688561	195	+	0	0	0	0	0	0	0	0
AC203208.4_FG001	5:189704286-189705825	657	-	0	0	0	0	0	0	0	0
AC203220.3_FG006	7:82403005-82407448	933	+	0	0	0	0	0	0	0	0
AC203227.3_FG001	8:73168070-73168650	435	+	0	0	0.195738	0.623169	0.444906	0	0	1.55998
AC203228.3_FG003	7:125763961-125764518	558	-	0	0	0	0	0	0	0	0
AC203237.3_FG001	8:109328424-109329675	843	-	0.0861115	0	0	0	0	0	0	0
AC203244.4_FG001	6:65794079-65796126	630	+	0	0.269657	0.206337	0.328984	0.118471	0.490558	0.105557	0.659456
AC203253.4_FG001	3:151595550-151596125	576	-	0	0	0	0	0	0	0	0
AC203257.2_FG003	2:141703163-141704815	660	+	0	0	0	0	0	0	0	0
AC203260.3_FG003	8:63914156-63915090	708	+	0	0.113315	0	0	0	0	0	0
AC203262.3_FG002	1:148513533-148513892	360	+	0	0	0	0	0	0	0	0
AC203265.3_FG002	6:60925033-60928549	1557	+	0	0	0	0	0	0	0	0
AC203278.4_FG004	5:69971182-69972036	465	-	0.217564	0.225324	0.687983	0.273904	0	0	0.1769	0
AC203280.3_FG001	1:119978961-119980191	693	+	0.339808	0.233804	0	0	0	0	0	0.143067
AC203294.3_FG001	8:171275246-171277488	1395	-	0	0	0.0361319	0	0	0	0	0
AC203294.3_FG008	8:171169868-171170176	309	+	7.64333	0	1.3972	1.46982	6.16599	0.733962	6.86024	2.94776
AC203294.3_FG012	8:171193955-171194488	534	+	9.69861	3.34288	7.79975	1.50008	2.61601	0.639125	6.48218	1.50299
AC203306.3_FG003	6:60818210-60819753	438	+	0	0	0	0	0	0	0	0
AC203307.4_FG001	6:157019168-157019491	324	+	1.51576	5.2833	0.800105	2.53073	2.22264	1.89335	0.837511	0
AC203311.3_FG005	10:25610871-25611248	378	-	0	0	0	0	0	0	0	0
AC203316.3_FG003	10:57691611-57692798	1080	-	0	0	0	0	0	0	0	0
AC203316.3_FG004	10:57700508-57702459	924	-	0.152481	0	0	0	0	0	0	0
AC203324.3_FG008	5:199142128-199143749	681	-	0	0	0	0	0	0	0	0
AC203332.3_FG001	10:30796170-30797220	717	-	0	0	0	0	0	0	0.0870465	0
AC203341.3_FG003	10:74445628-74446097	273	+	0	0	0	0	0.820996	0	0	0
AC203359.3_FG001	5:184825930-184826364	435	+	0	0	9.99487	11.761	2.19676	3.25401	0	1.55999
AC203363.3_FG007	1:198227927-198228751	825	-	0	0	0	0	0	0	0	0
AC203365.3_FG004	5:204903027-204904557	597	+	0	0	0.224287	0	0	0	0.114818	0
AC203365.3_FG007	5:204934786-204935364	495	+	0	0	0	0	0	0	0	0
AC203366.4_FG001	3:222406653-222482919	7548	+	43.1226	26.5466	27.6483	32.1655	24.6695	26.3008	33.2128	42.2512
AC203381.3_FG006	8:174062311-174062553	243	+	0	0	0	0	0	0	0	0
AC203382.3_FG005	1:223789578-223791020	756	+	0	0	0	0	0	0	0	0
AC203392.3_FG004	8:167083974-167086722	1308	-	0	0	0	0	0	0	0	0
AC203394.3_FG004	2:127598915-127600727	510	-	2.02517	2.28552	4.22005	2.78215	1.66311	1.84394	3.1365	6.2713
AC203401.3_FG003	7:135234428-135235138	711	-	0.327417	0.225247	0.258687	0	0	0	0.176224	0.137859
AC203408.4_FG003	6:24316769-24318275	1197	+	0.109988	0.396534	0.043437	0.207984	0.150653	0.826926	0.0442423	0
AC203423.3_FG009	9:47636452-47639265	2448	+	0	0	0	0.0304545	0	0	0.135737	0
AC203424.3_FG001	8:110987838-111050189	3460	-	59.9504	43.8869	44.9359	37.9783	56.4589	51.6912	60.3404	44.1771
AC203430.3_FG007	5:205388870-205391737	489	+	0	0	0	0	0	0	0	0
AC203437.2_FG002	10:114948105-114948845	741	-	0	0	0	0	0	0	0	0
AC203439.3_FG005	2:168041506-168041985	480	+	0.615413	0.424763	0.324322	0.516572	0.739941	0.513572	0.833299	0
AC203531.3_FG002	8:11916871-11917152	282	+	0	0	0	0	0	0	0.706356	0
AC203535.4_FG001	3:157508995-157518195	2778	+	52.8362	40.7912	68.7966	45.3491	54.6218	58.4214	50.4228	53.2114	MYB
AC203535.4_FG002	3:157576117-157577069	741	-	27.6763	34.6046	11.6239	85.5701	76.8239	115.09	34.6235	130.104	NAC
AC203535.4_FG004	3:157585924-157588143	1113	-	0.481214	0.681685	0.712684	1.66819	0.219616	0.376855	0.0968161	0.760416
AC203535.4_FG006	3:157416242-157417530	927	-	1.60503	1.71194	2.28266	0.996608	1.17555	1.93875	1.71595	2.45127
AC203535.4_FG007	3:157412721-157415760	1308	+	0	0	0	0	0	0	0	0
AC203570.4_FG005	10:90219845-90245423	2897	+	9.14911	10.1535	6.68711	6.74085	8.66267	8.28292	7.97144	9.43485
AC203571.3_FG001	9:113603800-113604702	903	-	0.628606	0.0810023	0.744854	0.198074	0.214829	0.590665	0.696421	0.198605
AC203571.3_FG007	9:113662340-113664393	735	-	0	0	0	0	0	0	0	0
AC203672.3_FG001	7:114556252-114556716	465	-	0.870258	3.37985	0	0	0	0	0	0
AC203748.3_FG002	9:99087087-99088637	1551	+	0	0	0.0319044	0.101863	0.184668	0.101247	0	0.0510852
AC203752.5_FG002	6:96678707-96698315	4302	-	59.9318	42.677	62.0179	58.2472	106.802	92.4824	78.0879	44.4233
AC203753.4_FG006	7:36511675-36544813	3636	+	9.59981	0.253949	2.58213	0.632281	0.52401	0.311223	3.47794	1.01454
AC203753.4_FG007	7:36507390-36507749	360	+	0	0	0	0	0	0	0	0
AC203754.4_FG007	6:151137130-151137897	768	-	0	0	0	0	0	0	0	0
AC203754.4_FG008	6:151130567-151135142	1912	-	9.02854	3.76298	4.59453	8.89877	9.07499	13.9845	6.99705	12.5044
AC203761.3_FG002	9:35402616-35464419	4154	+	2.5968	5.8753	7.70129	3.07952	5.46789	3.99164	3.52887	3.61134
AC203768.3_FG005	6:42733839-42741381	1008	-	0	0	0	0	0	0	0	0
AC203774.3_FG004	6:122578918-122581695	714	-	0	0	0	0	0	0	0	0
AC203777.3_FG001	8:6235009-6235314	306	-	0	0	0	3.79725	0.53037	0	0	0
AC203777.3_FG004	8:6259322-6260413	1092	+	0	0	0	0	0	0	0	0
AC203790.3_FG004	1:128498191-128498502	312	+	0	0	0.901853	1.42381	0.498295	0.710796	1.89555	0
AC203802.2_FG005	10:105875438-105875893	456	+	0	0	0	0	0	0	0	0
AC203804.4_FG008	3:46476020-46477824	561	-	0	0	0	0	0	0	0	0
AC203806.3_FG006	3:166527930-166529618	783	+	0	0	0	0	0	0	0	0
AC203831.3_FG002	3:5328987-5333008	819	+	0	0	0	0	0	0	0	0
AC203834.4_FG004	3:123622985-123624240	693	-	0	0	0	0.285448	0	0	0	0.143067
AC203841.3_FG002	10:124183226-124186051	2826	-	1.09455	1.7849	1.14162	1.06773	1.68326	1.70835	1.9064	1.6197
AC203841.3_FG009	10:124230566-124237641	1819	-	14.8332	20.2201	20.4089	16.1067	18.5667	17.3558	17.9742	22.6882
AC203847.3_FG004	8:133025594-133027927	840	+	0.778738	1.23726	19.5193	1.30861	7.95291	0.216799	17.9761	0
AC203847.3_FG009	8:132964925-132966655	1098	+	0.0611763	0.195569	0.0967613	0	2.69338	0.229963	0.248386	0
AC203855.2_FG001	8:141082745-141083035	291	+	0	0	0.57999	0.911649	0.632081	0	0	0
AC203862.4_FG001	8:78638029-78639525	1497	-	1.22092	1.4305	0.764775	1.22084	0.500321	1.31899	0.372257	0.26619
AC203862.4_FG002	8:78640407-78643457	2205	-	9.89306	11.8827	4.30243	10.424	7.96356	11.3119	9.01105	15.2215
AC203865.3_FG001	3:119976377-119979899	1368	-	18.7961	26.0197	12.0996	9.49717	13.5776	9.53739	9.2964	12.1529	CPP
AC203900.3_FG006	3:198375027-198376271	1245	-	0	0	0	0	0	0	0	0
AC203909.3_FG003	4:32229860-32231506	1647	+	0.602935	0.543123	0.0892847	0	4.82454	7.41435	1.21128	1.52498
AC203909.3_FG006	4:32162277-32162762	486	+	3.61	1.86831	7.2926	4.54547	6.33227	7.53175	7.00419	7.33569
AC203909.3_FG007	4:32164015-32165649	1635	+	0.0380024	0	1.20054	0.191658	0.382269	0.0476248	0.916173	0.0480587
AC203909.3_FG010	4:32143077-32143421	345	+	0	0	0	0	0	0	0	0
AC203925.3_FG002	4:22697227-22712080	2148	+	3.96656	10.2424	5.13934	5.39842	4.08846	3.43745	5.82243	2.77064
AC203928.4_FG001	9:91717166-91717504	339	-	0	0	0	0	0	0	0	0
AC203944.4_FG002	4:156027890-156028351	462	+	0	0	0	0	0	0	0	0
AC203955.3_FG002	8:104449987-104451180	642	-	0	0	0	0	0	0	0	0
AC203955.3_FG005	8:104467697-104468518	822	+	0	0	0	0	0	0	0	0
AC203956.3_FG004	9:113478808-113484440	1473	-	0	0	0	0	0	0	0.0344902	0
AC203957.3_FG001	2:174345809-174345940	132	+	0	0	0	0	0	0	0	0
AC203957.3_FG004	2:174469304-174470553	1116	-	0.239804	1.79447	8.73666	1.19055	2.41026	6.44293	6.33925	0.075788	bZIP
AC203966.5_FG002	1:299638957-299642749	666	-	0.240173	0.123967	1.04372	2.8748	1.41778	2.10572	0.485099	0.909962
AC203966.5_FG003	1:299608577-299609401	825	+	0.0793669	0	0	0.000252803	0	1.15209	2.1633	0
AC203966.5_FG005	1:299528035-299529150	1116	-	15.1076	18.3439	67.0527	18.5912	44.7622	19.6813	41.4432	16.6734
AC203966.5_FG006	1:299542046-299545429	747	-	0.305161	1.36425	0	0.128184	0.0925225	0.127421	0.0820831	0
AC203972.3_FG001	10:27647980-27650691	2712	+	0.323935	0.866601	0.35814	0.680803	0.257085	0.243602	0.398728	0.245859
AC203972.3_FG003	10:27714867-27715537	564	-	0	0.160634	0	0.391546	0	0	0	0.392353
AC203976.4_FG001	8:63957039-63958470	864	-	0	0	0	0	0.0758984	0.104378	0	0
AC203980.3_FG003	1:126847154-126847839	429	-	0	0	0	0	0	0	0	0
AC203985.4_FG001	10:79279020-79280632	1524	-	0	0	0	0	0	0	0	0
AC203985.4_FG005	10:79370667-79371107	441	-	8.80379	11.8747	0	0.00503158	0	0.530545	14.2874	4.89816
AC203986.3_FG013	7:160253689-160254129	441	+	0	0.249701	0.380959	0	0	0.301497	0.196187	0
AC203989.4_FG001	1:176756707-176758919	1593	-	53.1188	72.4724	60.588	83.6398	49.6103	62.9105	61.5032	97.4048
AC204007.3_FG001	8:164451949-164454433	744	+	0	0	0	0	0	0	0	0
AC204007.3_FG008	8:164356857-164357342	486	+	15.0417	7.05808	14.5852	4.54547	7.23689	5.52328	5.5382	7.08273
AC204009.3_FG009	3:184631674-184632285	462	-	0	0	0	0.277257	0	0	0	0
AC204015.3_FG006	4:60153082-60157614	1071	+	0	0	0	0	0	0	0	0
AC204017.4_FG003	2:3940725-3941660	528	-	0	0	0	0	0	0	0	0
AC204035.3_FG003	1:38852182-38852820	639	-	0	0.131938	0	0.321969	0	0	0.103285	0
AC204048.3_FG002	5:51429334-51429642	309	-	1.76385	2.46604	1.3972	0.734909	1.02767	2.20188	0.490017	0.736941
AC204050.4_FG006	6:162141712-162143124	1413	-	0	0.231993	0.427053	0.170424	0.2059	0.45172	0.507166	0
AC204051.3_FG001	2:67008002-67008472	471	+	0	0	0	0	0	0	0	0
AC204060.3_FG010	4:233334315-233336196	420	-	0.265884	0	0	0	0	0	0	0.334994
AC204070.3_FG004	7:36208270-36236263	3044	+	16.1305	11.4668	6.14247	9.77022	10.4474	10.24	12.7883	13.1452
AC204088.3_FG010	5:180486734-180487192	459	+	0	0	0	0	0	0	0	0
AC204212.4_FG001	5:201120649-201120939	291	+	0	0	2.31996	0	0	0	1.23149	0	MYB_related
AC204213.1_FG007	1:253914723-253917328	351	-	0	0	0	1.51794	0.357681	1.00797	0.331875	1.0137
AC204231.3_FG010	4:233769445-233771085	1380	-	0	0	0	0	0.0846884	0.0580672	0	0
AC204252.3_FG001	4:43351795-43352862	1068	-	0.190002	0.19577	0	0.239509	0.115586	0.0793566	0	0.16012
AC204254.3_FG001	8:8730984-8731430	447	+	0.371893	1.97851	7.40975e-05	10.8483	2.2285	3.50081	3.72567	2.20524
AC204271.3_FG003	10:97552048-97552850	423	+	0	0	0	0	0	0	0	0
AC204277.3_FG006	8:118529462-118531088	831	-	5.44332	5.61314	5.82606	6.19637	5.59651	6.5993	4.24693	8.54221
AC204292.4_FG002	6:137030625-137032622	1998	+	0.246996	0.569005	0.116617	0.420413	1.65107	2.20402	0.913309	0.290232
AC204292.4_FG003	6:137029391-137030029	639	+	0	0	0.302894	0	0	0	0	0
AC204292.4_FG005	6:137015214-137015618	405	+	0	0	0	0	0	0	0	0
AC204292.4_FG006	6:137078714-137080990	2277	-	0.0261568	0.296094	0.0413135	0.197894	0.167603	0.753996	0.357062	0.297763
AC204298.3_FG006	5:135288385-135290727	2007	-	0.120423	0.123931	0.0475583	0.265701	0.137735	0.188647	0.120893	0.0380787
AC204300.3_FG003	3:30531098-30533434	1611	+	0	0	0	0.0974788	0	0.0484448	0	0
AC204300.3_FG009	3:30539243-30539758	345	+	0	0	0	0	0	0	0	0
AC204306.3_FG007	1:56756491-56756985	495	+	0.194084	0	0	0	0	0	0	0.244831
AC204311.4_FG004	2:122953928-122957720	1523	+	0.660199	0.679744	0.619187	0.884397	0.943082	1.03422	0.862313	0.678321
AC204325.3_FG003	3:54163534-54164148	615	-	0	0	0	0	0.12289	0	0	0
AC204351.3_FG004	7:24394696-24395763	1068	-	0	0	0	0	0	0	0	0
AC204352.3_FG012	6:156830401-156831790	1086	-	0	0	0	0	0	0	0	0
AC204359.3_FG004	8:171429588-171431286	1053	+	0	0	0	0	0	0	0	0
AC204359.3_FG005	8:171439571-171440653	1083	+	20.787	25.0082	19.5655	14.5139	22.7755	26.5139	25.0463	21.7141
AC204377.3_FG001	9:58214828-58215082	255	-	0	0	0	0	0	0	0	0
AC204381.3_FG001	3:192409367-192413520	2823	+	0.206757	0.234006	0.244916	0.625733	0.624847	0.803332	0.414912	0.392315
AC204383.2_FG002	4:175422301-175422924	624	-	0	0	0	0	0	0	0	0
AC204387.3_FG002	2:110425137-110425352	216	+	0	0	0	0	0	0	0	0
AC204437.3_FG004	10:145202943-145203656	714	+	0	0	0.0857078	0	0.197229	0	0.087576	0
AC204472.3_FG002	9:37264105-37285252	1175	+	1.03231	2.11353	1.98073	0.891875	1.59235	2.14102	0.724516	2.11317
AC204476.3_FG004	5:186532942-186534496	1080	-	0	0	0	0	0	0	0	0
AC204502.4_FG006	8:170275456-170276541	1086	+	0.0763255	0.245148	0.185082	0.058632	0.217969	0.000428465	0.248009	0
AC204515.4_FG003	3:188558064-188558486	423	-	0.262005	0	0	0	0	0	0	0
AC204515.4_FG006	3:188528710-188530299	1512	+	0	0	0.0657315	0	0.0380419	0	0.100345	0.0526216
AC204519.3_FG003	6:118089068-118090089	516	-	0	0	0	0	0	0	0.292661	0.455234
AC204520.3_FG005	6:117894420-117895294	681	-	0	0	0	0	0	0	0	0
AC204530.4_FG002	1:61612916-61631441	2663	+	31.8738	33.1901	36.4466	39.2934	35.591	34.758	41.6372	54.4235
AC204530.4_FG003	1:61621307-61622780	1098	-	0.244763	0.882416	0.241611	0.0771179	0.502509	1.53311	0.246216	0.309343
AC204530.4_FG006	1:61666123-61670385	2743	+	0.810168	1.86637	1.94855	2.41569	1.96671	1.07208	1.18148	0.707121
AC204539.4_FG001	2:189543918-189555416	551	+	6.3836	11.2659	4.35134	8.46841	5.45145	5.64824	1.70496	6.15899
AC204539.4_FG003	2:189560453-189563321	657	+	0	0	0.0968279	0	0.22254	0.153485	0.297066	0
AC204540.3_FG001	1:66117383-66117853	471	-	0	0	0	0	0	0	0	0
AC204552.3_FG001	1:89096160-89097906	651	-	0	0	0	0	0	0	0	0
AC204563.3_FG011	7:11792188-11803138	2180	+	2.15778	1.64965	0.851106	0.89574	2.43618	5.00086	1.46575	3.23397
AC204569.3_FG002	2:111129941-111130978	1038	+	0	0	0	0	0	0	0	0
AC204573.3_FG002	6:111560614-111561417	804	-	0	0	0	0.115738	0	0	0	0
AC204573.3_FG015	6:111468089-111470058	1734	+	0	0	0	0	0	0	0	0
AC204581.3_FG003	6:156532981-156533274	294	+	0	0	0	0	0	0	0	0
AC204591.3_FG002	1:249609870-249610287	288	+	0	0	0	0	0	0	0	0
AC204604.3_FG008	5:200441505-200442870	853	+	13.6502	16.4803	13.6945	13.3103	23.0924	17.4464	8.91476	9.62959
AC204605.3_FG008	4:37189514-37190558	594	-	0	0	0.113038	0	0	0	0	0
AC204611.4_FG001	4:18117873-18119930	1125	-	0.0593564	0.122301	0.140652	0.374125	0.162545	0	0	0.150074
AC204618.3_FG001	6:81328552-81328986	435	+	0	0	0	0	0	0	0	0
AC204619.3_FG003	8:146924732-146925124	393	+	0	0	0.485256	0	7.13203	5.7559	0	0
AC204621.4_FG006	4:1269993-1270970	885	-	0.161389	0.166384	0	0	0	0	0.0650269	0.101977	GRAS
AC204636.3_FG003	4:148942167-148942730	564	+	0	0	0	0	0	0	0	0
AC204641.5_FG001	7:68892128-68896934	1746	-	0.0352429	0	0	0	0	0	0	0
AC204641.5_FG003	7:68906042-68909293	2004	+	0	0.0620698	0.071441	0	0	0	0	0.0381378
AC204659.3_FG005	1:62239790-62241042	687	+	0	0	0	0	0	0	0.0926488	0
AC204662.3_FG005	6:14780938-14781546	609	-	0.137565	1.56301	0.326114	0.519908	0.873258	0.516839	0.222536	0.34737
AC204679.3_FG003	4:99293586-99296413	1509	+	0	0	0	0	0	0	0	0
AC204687.3_FG001	7:101385435-101387406	735	-	0	0	0	0	0	0	0	0
AC204690.4_FG005	4:44820548-44826962	972	+	0	0	0	0	0.0651011	0.0894471	0	0
AC204703.3_FG007	3:223024974-223026125	825	-	0	0	0	0	0	0	0	0
AC204707.4_FG001	3:9273338-9273742	360	+	0	0	0	0	0	0	0	0
AC204710.4_FG003	4:30479109-30479773	417	+	0	0	0.213414	0	0	0	0	0
AC204711.3_FG002	10:102366411-102371816	2078	+	1.25146	3.95098	19.8696	38.0161	6.11291	8.9299	9.52338	6.14577
AC204711.3_FG003	10:102311847-102320525	1096	-	165.889	217.356	194.887	348.417	416.806	608.518	166.034	297.24
AC204712.3_FG002	3:199982366-199984383	739	-	22.028	15.2445	36.1965	16.3797	24.5274	18.1975	22.0987	15.6274
AC204712.3_FG006	3:200114326-200115063	738	+	0	0	0	0	0	0	0	0
AC204717.3_FG005	2:162979554-162981080	1447	-	0.219068	0.0451188	0.173019	0.165717	0.200231	0.164724	0.387451	0.498616
AC204763.2_FG001	6:159470220-159471460	897	+	0.237808	0.572035	1.44025	0.599465	0.505663	0.496564	0.894219	0.400713
AC204768.3_FG001	7:98915458-98916987	774	-	0	0	0	0	0	0	0	0
AC204772.2_FG002	7:143389969-143390385	417	-	0.53976	0.279993	0	0	0	0.337679	0.440389	1.02002
AC204821.3_FG004	1:92025632-92026378	747	+	0	0	0	0	0	0	0	0
AC204845.3_FG008	7:3013150-3014245	600	-	0	0	0	0	0.127651	0	0	0
AC204868.3_FG004	4:186839752-186841049	678	+	0.467832	0.603619	0.369642	0.147367	0.531233	0.292986	0.188946	0.44315
AC204887.4_FG003	1:458334-458906	573	-	0	0	0	0	0	0	0.122644	0
AC204891.4_FG001	4:151916441-151922092	2256	-	0.624471	0.939049	1.0308	0.818339	0.413259	0.391118	0.523521	1.08453
AC204893.3_FG001	8:9919345-9920090	360	-	0	0	0	0	0	0	0	0
AC204897.3_FG007	3:227446444-227446947	504	-	0.187961	0	0	0.710076	0	0	0.152533	0.237118
AC204931.3_FG002	1:54456036-54456665	630	+	0.130564	0	0	0	0.118471	0	0	0
AC204931.3_FG004	1:54339214-54340577	354	+	2.76027	2.46483	4.36847	3.46475	7.35171	5.42244	2.60801	0.995463
AC204944.3_FG004	6:130438012-130438338	327	+	0	0	0	0	0	0	0	0
AC204953.3_FG002	2:138906162-138906854	693	-	0	0	0.0894944	0	0	0	0	0
AC205008.4_FG002	7:21633292-21636720	2968	+	0.332455	0.282116	2.13443	1.99735	0.182885	0.110933	1.86843	2.95221
AC205012.3_FG002	8:77431960-77434618	2585	-	2.98779	1.97561	5.91012	2.74819	4.84957	3.11498	2.6729	3.30523
AC205026.3_FG003	6:109167300-109172449	1068	-	0	0	0	0	0	0	0	0
AC205033.4_FG004	9:71260994-71261374	381	-	0	0	0	0	0	0	4.04548	3.31532
AC205035.3_FG004	6:128775648-128779902	2521	-	3.09388	5.69058	4.61752	4.67038	2.40919	1.94377	0	0.243868
AC205057.3_FG002	4:84831997-84833223	1227	-	6.43602	2.75581	4.53691	4.58551	4.39148	2.73838	3.53904	4.30755
AC205057.3_FG004	4:84835641-84847440	11204	-	1.0799	6.07821	1.44315	1.88728	1.0975	1.54756	1.78254	1.2281
AC205060.2_FG002	3:189063208-189064147	489	+	0.396681	1.02641	0	0	0	0	0	0
AC205066.3_FG008	2:200773483-200773998	516	+	0	0	0	0	0	0	0	0
AC205077.3_FG003	1:103559787-103560460	603	-	8.66173	9.38033	3.75351	6.86385	1.39336	2.97428	2.93839	8.28991
AC205078.3_FG009	2:45948500-45949297	798	+	0.0927855	0	0.219906	0.116933	0	0	0	0.351701
AC205100.3_FG001	1:35141959-35147250	951	-	0.146869	0.151379	0	0	0	0	0.0591488	0.185626
AC205104.3_FG003	5:45536387-45537567	225	-	0	0	0	0	0	0	0	0
AC205106.3_FG004	2:117629968-117630303	336	-	0	0	0	0	0	0	0	0
AC205110.4_FG001	UNKNOWN:5440179-5440559	381	+	0	0	0	0	0	0	0	0
AC205122.4_FG003	7:2133070-2135590	654	+	209.403	310.268	336.236	345.474	228.591	298.031	231.235	222.959
AC205122.4_FG005	7:2141396-2142814	1419	+	0	0	0	0	0	0	0	0
AC205122.4_FG006	7:2144037-2146304	2268	-	0	0	0	0	0	0	0	0
AC205122.4_FG007	7:2149678-2152050	1434	+	0	0.0455965	0	0	0.0404718	0	0	0
AC205122.4_FG008	7:2156213-2157640	1428	+	0	0	0.0351467	0.112209	0	0	0.035776	0
AC205122.4_FG009	7:2159226-2160736	792	-	0	0	0	0.118153	0	0	0	0.236912
AC205122.4_FG010	7:2175684-2207710	2481	-	0	0	0.0563847	0.0300106	0	0	0.0191078	0
AC205154.3_FG001	4:96639114-96642233	513	+	0	0	0	0	0	0	0	0
AC205154.3_FG005	4:96694517-96695634	1029	-	0.132754	0	0.0524314	0.0836705	0	0.0831681	0.10688	0.0839031
AC205155.3_FG001	4:61356928-61358140	486	+	0	0	0	0	0	0	0.162888	0
AC205158.3_FG004	4:49788731-49790304	564	-	0	0	0	0	0	0	0	0
AC205165.3_FG002	9:29946866-29947237	372	+	0.348423	0.724858	0	0	0	0	1.4288	0.876802
AC205171.3_FG001	2:80718842-80719243	402	+	0	0	0	0	0	0	0	0
AC205173.3_FG001	7:74524380-74525162	783	-	0	0	0	0	0	0	0	0
AC205175.3_FG001	1:100575655-100577421	1629	-	0	0	0	0.0481181	0.034899	0	0	0
AC205175.3_FG002	1:100581757-100582284	528	-	0	0	0	0	0	0	0	0
AC205250.3_FG004	8:169121590-169122225	636	+	0	0	0	0	0	0.322356	0	0
AC205250.3_FG006	8:169136716-169137354	639	+	0.00957742	0.000876183	0	0	0.718818	0.537537	0.739552	0.0663861
AC205251.3_FG002	2:142226957-142227562	606	+	0	0	0	0	0	0	0	0
AC205269.3_FG003	4:116859407-116859974	327	-	0	0.513637	0.778156	0	0.432851	0	0	0
AC205274.3_FG001	8:52299255-52299758	504	-	0.187961	0.583416	1.03998	0	0.848689	0	0	0
AC205320.3_FG004	7:6069942-6070566	579	+	8.19376	5.84965	11.1844	5.06688	7.42345	5.41017	6.51179	5.4537
AC205324.3_FG003	4:237894455-237896503	2049	-	0.0588259	0.0605433	0	0.111261	0.080749	0.0737248	0.0945502	0.0744146
AC205326.3_FG002	8:168669880-168670857	978	+	3.46592	2.22173	2.85835	3.38946	1.5813	1.22565	4.23033	2.9388
AC205331.3_FG004	5:114321144-114322971	492	-	0	0	0	0	0.354067	0.736741	0	0
AC205336.3_FG003	1:160633788-160635656	906	+	0	0	0	0	0	0	0	0
AC205345.3_FG002	6:89785632-89788795	1356	+	0.662401	1.07195	0.560547	0.656156	1.51316	0.830071	1.1794	1.25634
AC205362.4_FG002	6:18156459-18158445	1455	+	1.26236	6.09574	14.4051	7.24426	2.38725	1.25464	5.63392	1.48617
AC205369.3_FG001	3:27008624-27009322	699	-	0	0.11544	0.0883788	0	0	0	0	0
AC205376.4_FG003	4:79539415-79587397	796	-	0.465531	1.18733	1.49027	1.65955	0.597683	0.360496	1.66134	0.711069
AC205376.4_FG008	4:79587613-79592732	914	+	5.58211	6.50352	3.75649	4.44186	3.38027	4.84341	4.84789	5.98881
AC205379.3_FG012	1:206387213-206388011	579	-	0.148977	0	0	0	0	0	0	0
AC205395.3_FG003	6:121702509-121703568	681	+	0	0	0	0	0	0	0	0
AC205405.3_FG001	2:158945280-158945702	423	+	0	0	0	0	0	0	0	0
AC205411.3_FG001	5:130032756-130033196	441	+	0	0	0	0	0	0	0	0
AC205413.4_FG001	10:86099715-86100737	1023	-	0.0668716	0.13782	0.158466	0.0842933	0	0.0837872	0.107679	0
AC205413.4_FG002	10:86005621-86006334	714	-	0	0	0.0857078	0	0	0	0	0
AC205413.4_FG003	10:86052856-86053872	1017	-	0.0673733	0	0	0	0	0	0	0
AC205417.3_FG003	1:146393560-146394078	519	+	0	0	0	0	0	0	0	0
AC205419.3_FG001	9:142806356-142814430	4594	-	49.8443	33.485	32.1278	55.9224	36.2917	47.8115	42.2022	46.06
AC205425.3_FG006	5:106094215-106094469	255	-	0	0.891861	1.48968	2.31545	0.847269	3.7116	0.689055	2.08965
AC205466.3_FG003	5:58966110-58966844	516	-	0	0	0	0	0	0	0	0
AC205470.3_FG008	7:95434751-95436675	1887	+	0	0	0	0.0406846	0	0.0404386	0	0
AC205471.4_FG003	8:125180331-125182094	1341	+	2.39731	2.22194	1.93131	2.11565	1.05139	2.163	1.69641	2.00059	HSF
AC205471.4_FG007	8:125226068-125226454	387	-	37.9178	54.3091	95.5529	64.9424	103.34	175.216	61.2218	115.865
AC205471.4_FG008	8:125196525-125197922	1398	-	0.0912623	0.375911	0.03604	0.115059	0.208505	0.171547	0.146751	0.0576989
AC205476.3_FG007	6:67088025-67088627	603	+	0	0	0.110397	0.87998	0	0.174958	0	0
AC205484.3_FG005	4:124781045-124789968	726	+	0.635521	1.31149	1.00421	0.800832	0.866778	0.530712	1.11144	0.669002	NAC
AC205485.3_FG011	4:183086553-183089394	2289	-	0.0260053	0	0	0.0327914	0	0.0325926	0	0
AC205490.4_FG004	5:5619736-5620473	738	+	0	0	0	0	0.0941081	0	0	0.522886
AC205496.3_FG002	4:75559213-75559713	501	+	0.379898	0	0	0	0	0.237798	0.154166	0
AC205500.3_FG002	1:106667528-106674802	2381	-	2.75902	2.70456	3.56674	2.62478	3.11111	3.16633	2.67523	3.48645
AC205502.4_FG004	1:59467407-59469906	1614	-	0.732903	1.11195	1.71739	0.583617	1.34036	0.676775	0.371993	0.487809
AC205511.3_FG002	4:143885206-143892522	1503	-	0.0419043	0	0.231671	0.105665	0	0	0.0336832	0
AC205513.3_FG003	1:100991525-100992887	831	+	0	0.814811	0.0693579	0.774546	0	0	0.141564	0
AC205521.3_FG003	4:69339347-69344007	2295	+	76.4934	60.7545	52.7759	64.9401	48.6628	52.2062	56.3125	80.8085
AC205532.3_FG001	4:142684864-142686955	777	+	0	0	0	0	0	0	0	0
AC205534.3_FG001	4:143612708-143613283	516	-	0	0	0	0	0	0	0	0
AC205534.3_FG002	4:143679438-143680820	1319	-	0	0	0	0	0.223621	1.77716	0.659072	0.618334
AC205544.3_FG004	2:140056166-140057095	429	-	0	0	0	0	0	0	0	0
AC205558.3_FG002	1:102925102-102925500	399	-	0.420792	0.308018	0	0.494806	0	0	0.484888	0.373537
AC205560.3_FG003	4:122560119-122560457	339	-	0	0.462215	0	0.555416	0.783386	0	0.365586	0
AC205562.3_FG002	4:73366185-73367147	963	+	0	0.0744684	0	0	0	0	0	0	WRKY
AC205567.3_FG002	1:81960076-81960861	579	+	0.446932	1.23151	0.941842	0.375325	0.269944	0.373115	1.92942	1.12835
AC205574.3_FG006	3:3475915-3479648	2761	+	6.80395	5.4246	3.68745	10.5544	7.72129	9.4785	4.65145	13.4274	TCP
AC205591.4_FG006	4:214699098-214700037	261	-	0	0	0	0	0	0	0	0
AC205592.3_FG001	4:197923783-197925832	1134	+	1.19872	0.239085	0.667369	0.634797	0.956596	1.48708	0.425653	0.257585
AC205595.3_FG007	1:172081105-172081317	213	-	0	0	0	0	0	0	0	0
AC205605.3_FG002	6:56220287-56220994	708	+	0	0	0	0	0	0	0	0
AC205608.4_FG004	2:210528995-210532162	1937	-	4.9712	6.06934	5.10302	3.57895	3.52123	3.7123	5.4573	4.68087
AC205615.4_FG002	4:74753714-74768838	477	-	0	0	0	0	0	0	0	0
AC205619.3_FG003	1:238177925-238180072	1095	-	0	0	0	0	0	0	0	0
AC205664.3_FG001	4:61097769-61098113	345	-	0	0	0	0	0	0	0	0
AC205672.3_FG001	4:145495253-145496268	837	-	0	0.179311	0	0	0	0	0.0700929	0
AC205673.3_FG006	2:197006742-197014021	3180	-	1.73702	3.7971	0.383553	0.598832	1.5179	0.928516	2.20339	1.83919
AC205677.3_FG001	6:4883950-4890814	3880	+	20.7829	25.1487	17.5827	17.7613	18.8832	17.4374	24.4303	20.2003
AC205695.3_FG008	1:186615110-186616941	435	-	0	0	0	0	0	0	0	0
AC205703.4_FG001	5:181014743-181016466	498	+	1.53584	1.58925	1.51748	1.69221	0.519927	1.44202	0.62334	0.242172
AC205703.4_FG002	5:181001975-181011429	2011	+	155.1	106.92	65.7181	113.705	117.692	122.493	93.6738	177.262
AC205703.4_FG005	5:181192339-181197076	2523	+	4.50968	3.59673	9.18904	4.86096	3.97005	3.19526	6.02275	4.66627
AC205703.4_FG006	5:181197597-181200098	981	-	8.18375	15.8505	15.5482	19.475	8.75002	15.4688	11.7038	27.0188
AC205703.4_FG010	5:181206483-181214257	5820	+	7.65845	7.66475	7.45321	7.40064	8.24132	6.52054	9.24791	6.47223
AC205709.3_FG001	9:134834433-134835701	1155	+	0	0	0	0	0	0	0	0
AC205712.3_FG003	9:44973396-44974862	546	+	0	0	0	0	0	0	0	0
AC205713.4_FG004	1:228983009-228983329	321	+	0	0	0	0	0	0	0	0
AC205722.3_FG004	4:37111380-37162542	588	+	0	0	0	0	0	0	0	0
AC205725.3_FG010	1:23580043-23586538	4476	+	8.20401	6.41202	7.09302	3.92705	10.9649	7.63445	7.53976	4.98575
AC205726.4_FG003	4:205523186-205523518	333	+	0	0	0	0	0	0	0	0
AC205730.3_FG001	1:166361948-166364519	2001	-	0	0	0.0238537	0	0.0276388	0	0	0.0382019
AC205730.3_FG002	1:166324566-166341470	1836	+	3.07619	4.67598	2.79196	1.67034	2.62547	1.77219	3.36666	1.30962
AC205735.3_FG006	4:205308125-205309513	1389	-	1.42081	0.671465	0.486449	0.572476	1.20076	0.763469	1.06847	0.187002
AC205813.4_FG008	3:195770392-195772038	270	-	0	0	0	0	0	0	0	0
AC205814.3_FG001	1:194818102-194818494	393	-	0	0	0	0	0	0	0	0
AC205833.3_FG002	3:103456467-103457109	570	-	0	0	0	0	0	0	0	0
AC205834.3_FG003	4:222962015-222964637	2481	+	0.0475995	0	0	0	0.0435796	0	0.0382157	0.0301053
AC205853.3_FG014	4:239203068-239206028	2694	-	0	0	0.0171783	0	0.0199192	0	0	0
AC205886.3_FG001	6:90807106-90815834	1011	+	0.271531	0.139908	0.428969	0.342269	0.804962	1.95623	0.0546572	0
AC205888.4_FG004	1:59137860-59141285	2421	+	0.122238	0.201258	0.15446	0.369934	0.179055	0.306406	0.0981447	0.402024
AC205907.3_FG004	2:56634090-56634725	636	+	0	0	0	0	0	0	0	0
AC205968.3_FG001	5:59425799-59426044	246	-	0	0	0	0	0	0	0	0
AC205972.3_FG002	1:174431403-174431690	288	-	0	0	0	0	0	0	0	0
AC205976.3_FG004	3:153494259-153495059	801	-	0	0	0	0	0	0	0	0
AC205982.3_FG014	6:159183032-159183607	576	-	19.5482	16.9391	25.4052	16.8415	11.53	7.71278	16.35	8.53615
AC206030.4_FG001	1:197462896-197464488	1593	-	0.0391627	0.161277	0.247441	0.0987539	0.0716186	0.147236	0.0314739	0
AC206031.3_FG007	1:199738874-199739386	513	+	0	0	1.00829	0.229497	0.823243	0.68447	0.147833	0.45984
AC206156.3_FG003	6:14609667-14610359	693	+	0.113269	0.116902	0	0	0	0	0	0
AC206156.3_FG009	6:14461448-14462479	693	-	0	0	0.178989	0.142724	0	0	0	0
AC206160.3_FG001	4:191432488-191435335	405	-	0	0	0	0	0	0	0	0
AC206165.3_FG007	6:159616925-159618583	1410	-	0.135516	0.279092	0.107032	0.113901	0.0412831	0.226428	0.0363175	0.342713	HSF
AC206165.3_FG009	6:159631867-159632244	378	-	0	0	0	0	0	0.419476	0	0
AC206165.3_FG019	6:159663919-159664803	885	+	0.161389	0.332768	0.127491	0.305117	0.294109	0.606581	0.0650269	0.407906
AC206166.3_FG002	7:104535601-104535999	399	-	0	0	0	0	0	0	0	0
AC206168.2_FG003	9:111639898-111644335	1083	-	0	0	0	0	0	0	0	0
AC206169.3_FG002	9:42760293-42760778	486	+	0	0	0	0	0.180922	0	0.488665	0
AC206184.4_FG002	6:49101063-49101644	582	+	0	0	0	0	0	0	0	0
AC206185.3_FG002	6:116345195-116346376	1182	-	0	0.115061	0.0441127	0	0.050995	0	0	0
AC206186.3_FG001	6:91574151-91574510	360	-	0	0	0	0	0	0	0	0
AC206194.3_FG003	10:120831918-120833176	1062	-	0	0	0	0	0	0	0	0
AC206198.3_FG001	1:219719395-219719697	303	+	0	0	0	0	0	0	0.525807	0
AC206199.3_FG001	2:87006944-87007282	339	+	0	0	0	0	0	0	0	0
AC206199.3_FG005	2:87077896-87078240	345	+	0	0	0.334086	0.529546	0	0	0.347916	0
AC206201.3_FG004	1:294997951-295003799	1554	-	2184.36	1167.75	1424.06	1685.33	2626.72	892.909	2638.76	2269.98
AC206201.3_FG009	1:294932401-294936784	2196	-	0.951004	0.423393	0.676937	0.39966	0.496642	0.488122	0.147832	0.486367
AC206217.2_FG006	6:151793583-151794143	561	+	0	0	0	0	0	0	0	0	C2H2
AC206223.3_FG001	9:137411118-137413738	1465	-	4.43317	9.84144	4.82873	3.49454	6.3901	6.36082	15.3518	5.99648
AC206223.3_FG004	9:137250532-137257691	1842	-	0.663208	0.682659	1.30944	1.79788	0.667398	0.706488	0.346315	0.62908
AC206223.3_FG006	9:137336819-137339379	1785	+	5.15492	6.19071	7.24668	7.79959	6.72733	5.98657	4.80421	3.47702
AC206223.3_FG007	9:137355935-137356690	756	-	0	0	0	0	0	0	0	0
AC206223.3_FG008	9:137350754-137354173	2916	-	0.0598895	0.246476	1.27696	0.805564	1.11528	0.875736	0.368547	0.30304
AC206223.3_FG010	9:137344168-137344612	321	-	96.6974	42.4234	65.4546	34.4917	64.8729	61.0354	77.634	59.3625
AC206227.4_FG001	5:116420711-116424680	837	+	0	0	0	0	0	0	0	0
AC206259.3_FG002	1:292664334-292667201	2721	+	0.129108	0.0885632	0.0340172	0.108537	0.0197056	0.16182	0.0518223	0.163318
AC206259.3_FG003	1:292661090-292709217	10355	-	33.2902	35.4552	25.2069	34.7957	25.7208	23.0226	28.3753	26.746
AC206262.3_FG004	6:157144912-157145267	258	+	0	0	1.05202	0	0	0	0	0
AC206265.3_FG006	9:134616000-134616651	549	+	0.487364	0	0.25678	0.409233	1.32315	0.610248	0.263228	0
AC206266.3_FG001	9:17739670-17908271	5158	+	1.6116	9.89556	4.56633	9.59258	4.33711	8.0903	5.85823	7.82735
AC206273.3_FG004	9:111715379-111715717	339	-	0	0	0	0	0.391693	0	0	0
AC206274.3_FG008	6:148091111-148095676	732	+	0	0	0	0	0.0951957	0	0	0.132243
AC206285.3_FG003	3:127860081-127860488	408	-	0	0	0.223506	0	0	0	0	0
AC206285.3_FG005	3:127930756-127931685	930	+	0	0	0	0	0	0	0.0609004	0.0955449
AC206312.3_FG008	6:163105619-163106386	768	+	0	0	0	0	0	0	0	0
AC206319.2_FG004	6:88152659-88153096	438	-	0	0	0	0	0	0	0	0
AC206325.3_FG003	4:5812248-5815813	1551	+	0	0	0	0	0	0	0	0
AC206332.3_FG005	4:125492309-125495142	1773	+	0	0	0	0	0	0	0.0278238	0
AC206349.2_FG002	6:7433047-7433829	783	-	0	0	0	0	0	0	0	0
AC206350.3_FG005	3:15433008-15434096	1089	-	0.123616	0	0	0	0	0	0	0
AC206392.3_FG004	2:82202027-82202373	285	+	0	0	0.631639	4.95545	0	2.97836	0.67333	4.97507
AC206425.3_FG002	3:131930841-131931803	845	-	0	58.6656	0	45.857	0.0781796	1.3437	0	0.315974
AC206425.3_FG004	3:131847059-131848547	657	+	0.122545	0.126514	0.387311	0.308799	0	0	0.0990219	0
AC206503.3_FG001	2:105718710-105722600	972	-	0	0	0	0	0	0	0	0
AC206514.2_FG002	6:83669538-83672474	1404	-	0	0	0	0	0	0	0	0
AC206519.2_FG002	5:83025159-83025821	663	+	0	0	0	0	0	0	0	0
AC206547.2_FG002	10:27193235-27193723	489	-	1.19004	0.82113	0.940691	0.998966	2.68435	0.993157	3.06025	2.75187
AC206582.2_FG002	9:28441745-28442361	435	+	1.33588	1.28351	0	0.934792	2.22453	0.929394	1.61371	2.1846
AC206610.4_FG004	8:166863341-166865038	897	+	0	0	0	0	0	0	0	0
AC206610.4_FG005	8:166854854-166855882	726	-	0	0	0	0	0	0	0	0
AC206611.3_FG002	2:145026418-145026612	195	-	0	0	0	0	0	0	0	0
AC206611.3_FG003	2:145042907-145044461	1095	-	0.67524	0.25298	0.145461	0.232144	0	0.153832	0.691668	0.853596
AC206634.3_FG004	5:64095146-64096408	456	+	0.677311	0.935545	0	0	0.203242	0.565147	0.551014	0.56928
AC206638.3_FG007	2:3085080-3085499	420	+	0	0	0.26779	0	0	0	0.226083	0
AC206638.3_FG015	2:3190645-3190908	189	-	0	0	0	0	0	0	0	0
AC206642.4_FG001	2:77605531-77607759	802	+	678.092	254.38	768.494	461.698	646.375	497.92	447.148	573.753
AC206647.3_FG003	9:147507819-147508169	276	-	0	0	0	0	0	0	0	0
AC206655.3_FG004	6:12712224-12712604	381	-	0	0	0	0	0	0	0	0
AC206695.3_FG001	6:41904105-41906638	765	-	0	0	0	0	0	0	0	0
AC206698.2_FG002	8:117443173-117446202	2295	-	0	0	0	0	0	0	0	0
AC206700.3_FG003	5:93829199-93830105	687	+	0.344149	0	0	0.433637	0	0.143688	0.0926488	0.144891
AC206749.3_FG003	2:220329167-220329642	402	+	0	0	0	0	0	0	0	0
AC206763.3_FG002	2:182392288-182419179	1383	-	0	0	0	0	0	0.0579178	0	0
AC206764.4_FG001	3:690875-692941	2067	-	1.01239	0.197558	0.345428	0.260701	2.44513e-05	0.215144	0.605811	0.484042
AC206764.4_FG003	3:654965-655642	678	-	1.28654	0.724342	0.554464	1.17894	1.27496	1.75792	1.13367	1.03402
AC206768.3_FG005	3:88527498-88527953	456	+	0.22577	0.233886	0.178491	0	0.203242	0	0	0
AC206768.3_FG006	3:88506924-88509911	1233	+	0	0	0	0	0	0	0	0
AC206780.3_FG004	4:239087915-239090625	2604	-	0.0225802	0.0464601	0	0.0569287	0.020669	0.0848747	0	0.0571068
AC206788.3_FG008	6:159772119-159772388	270	-	7.16274	11.9762	12.1869	2.53413	10.3684	20.3707	14.0575	16.558
AC206788.3_FG015	6:159888909-159890330	1422	+	1.84815	1.58612	2.37475	1.13747	2.43907	2.80731	1.49174	2.2654
AC206831.3_FG015	9:147338721-147340639	348	+	0	0	0	0	0	0	0	0
AC206832.3_FG004	4:154028647-154029354	708	-	0	0	0	0.138372	0	0	0	0
AC206840.3_FG002	1:57349176-57349496	321	-	4.4994	6.4617	1.85184	2.18554	14.8416	10.4583	3.2169	8.89441
AC206898.3_FG006	5:32435597-32438520	1143	-	0.0582149	0	0.0459776	0.0733706	0	0	0.234166	0
AC206901.3_FG005	10:130721588-130723152	834	-	3.93158	3.15325	2.20865	2.8629	1.90954	2.40798	2.67656	3.20157	MYB
AC206941.2_FG002	5:12291230-12291790	561	-	46.2009	886.746	30.6697	1325.91	47.1323	368.653	98.4156	197.095
AC206946.2_FG009	6:113037573-113040851	798	+	0	0	0	0	0	0	0	0
AC206951.3_FG014	1:17511587-17512069	483	-	0	0	0	0	0	0	0	0
AC206951.3_FG016	1:17519643-17520458	816	-	0.359982	0.9281	0.355483	0.34026	0.573569	0.563714	0.362831	0.909709	ERF
AC206951.3_FG017	1:17526391-17527311	921	-	1.99071	2.84129	2.96365	6.27284	3.00095	2.4941	1.41872	1.64501	ERF
AC206952.3_FG001	4:186048375-186050487	744	+	0	0	0.484935	0	0	0.256293	0	0.258469
AC206968.3_FG001	2:46340624-46341052	429	+	0	0	0	0	0	0	0	0
AC206968.3_FG003	2:46343069-46345626	1281	-	0	0	0	0	0	0	0	0
AC206969.3_FG001	4:38446985-38448792	732	+	0	0	0	0	0	0	0	0
AC206980.3_FG007	2:5100809-5101384	576	+	0.150224	0.620945	0.474864	1.70307	0.952607	4.13857	0.48643	5.11996
AC206989.4_FG002	1:196306378-196307384	648	+	81.1938	67.943	57.4336	74.8711	52.1291	64.3997	59.2495	84.049
AC206999.1_FG002	1:172727465-172731700	2170	-	11.6136	23.085	0.305098	0.374474	0.058899	0.0806814	2.48652	0.809754
AC206999.1_FG007	1:172733618-172733863	246	+	0	0	0	0	0	0	0	0
AC207011.3_FG001	2:38593956-38596134	339	-	0	0	0	0	0	0	0	0
AC207019.3_FG003	1:252528936-252529737	669	-	0	0	0	0	0	0	0	0
AC207024.3_FG002	1:291780382-291781919	582	-	0.295503	0.305331	0	0	0.133875	0	0.358761	0.186515
AC207043.3_FG002	5:86013134-86013838	705	+	0.220964	0.342044	0.611034	0.27843	0.200836	0.553551	0.624429	0.279105
AC207043.3_FG004	5:85934526-85936601	963	-	0.0722527	0	0.114149	0	0	0	0	0.0913212
AC207080.3_FG005	5:187306993-187309600	1590	+	0	0	0.0309989	0	0	0	0.0630869	0
AC207104.3_FG001	5:81273796-81274512	717	+	0	0	0	0	0	0	0	0
AC207107.4_FG001	5:61958269-61959084	816	-	0	0	0	0	0	0	0	0
AC207107.4_FG002	5:61959885-61963506	780	+	0	0	0	0.120672	0	0	0	0
AC207119.3_FG001	1:215912930-215914936	810	-	0	0	0	0	0	0	0	0
AC207188.3_FG002	2:20119937-20120488	552	-	0	0.332852	0.763429	0.405569	0.728581	0.604783	0.782529	0.406386
AC207189.4_FG002	6:130924920-130925195	276	-	0	3.89648	1.45802	3.42031	2.34613	2.28806	0.783167	4.58163
AC207205.3_FG004	2:191471460-191492533	1039	-	0.917971	1.28374	0.466138	1.5704	1.3759	0.903719	0.686226	0.82883
AC207206.3_FG001	2:145778202-145778624	423	-	0	0	0	0	0	0	0	0
AC207206.3_FG003	2:145710487-145712719	1728	+	0	0	0	0	0	0	0	0
AC207225.3_FG001	1:124660482-124662057	345	-	0	0	0	0	0	0	0	0
AC207225.3_FG003	1:124664440-124673622	8827	+	0.962833	1.20247	0.924068	1.19017	1.09978	1.01214	0.971706	0.839236
AC207231.3_FG001	5:71569698-71572113	645	+	0	0	0	0	0	0.157788	0	0
AC207254.3_FG005	2:182224540-182225304	765	-	0	0	0	0	0	0	0	0
AC207260.3_FG003	6:88817373-88817843	471	+	0	0	0	0	1.40219	1.24875	0	0
AC207260.3_FG004	6:88983151-88984248	966	+	0	0	0	0	0	0	0	0
AC207265.3_FG002	9:14833132-14841478	2356	+	7.17931	9.36159	8.33473	6.07885	4.86755	8.31303	9.50621	4.58851
AC207309.3_FG007	9:125895435-125896370	936	+	2.02879	2.75817	2.25038	1.51187	1.2985	1.5654	2.03026	0.947481
AC207309.3_FG010	9:125953428-125953868	441	+	0	0	0	0	0	0	0	0
AC207321.3_FG003	3:175145739-175147280	1542	+	0	0	0.0642441	0	0.111552	0	0.0326889	0
AC207328.3_FG003	4:127209793-127210332	540	-	0.667947	1.89916	0.659875	0.841266	1.05743	0.627252	0.405977	0.632191
AC207342.3_FG001	8:136380345-136381870	1185	+	0	0	0	0	0	0	0	0	Nin-like
AC207342.3_FG007	8:136413869-136419143	2832	-	36.853	23.4129	28.8172	30.1674	34.4327	45.4876	34.1853	32.0967
AC207342.3_FG008	8:136412703-136416457	2733	+	12.8423	12.4889	25.0836	15.7788	22.4348	23.4348	21.628	7.51759
AC207347.3_FG005	1:252793890-252800952	2334	+	12.4974	15.0123	12.549	15.1572	12.1654	14.5856	13.8788	14.5581
AC207383.3_FG003	2:171235348-171236436	1089	+	0.123616	0.0636813	0	0	0.112816	0	0	0.0781333
AC207389.3_FG004	1:173889157-173889450	294	+	0	0	0	0	0	0	0	0
AC207397.3_FG001	4:108812800-108815545	2133	-	0	0	0	0	0	0	0	0
AC207427.3_FG005	3:198932468-198933022	171	-	603.58	396.172	951.198	684.264	848.449	103.892	1314.73	562.303
AC207454.3_FG004	9:133322469-133323014	546	-	0.819689	0.847405	0	0.206482	14.5374	22.7851	0.132828	0.206893
AC207472.3_FG001	3:20446331-20447382	321	+	0.519879	0	0	0	0	0	0	0
AC207533.2_FG002	2:152198784-152236985	6352	+	30.5568	35.2597	27.2737	33.984	30.8926	32.2195	26.0117	28.5143
AC207544.3_FG011	7:3866229-3868217	708	+	0	0	0	0	0	0	0	0
AC207546.3_FG004	1:297966020-297973176	1533	+	0	0	0.0323411	0	0	0	0	0
AC207549.3_FG010	1:66421315-66422193	879	-	0	0	0	0	0	0	0	0
AC207575.3_FG004	6:84561710-84562141	432	+	0	0	0	0	0	0	0	0
AC207619.3_FG001	1:192853576-192854835	513	+	0	0	0	0	0	0	0.147833	0
AC207620.2_FG007	3:180621008-180622864	1629	+	0	0	0	0	0	0	0	0
AC207628.4_FG002	3:202856043-202856873	831	+	0	0	0	0	0	0	0	0
AC207628.4_FG003	3:202897661-202908175	5469	-	0.87196	0.643624	0.445534	0.219929	0.714617	0.270023	0.469046	0.454259
AC207628.4_FG005	3:202940170-202943629	1838	+	0.832475	0.287971	2.41435	0.355149	0.871071	0.493368	0.707651	0.777636
AC207628.4_FG009	3:202827010-202833690	2777	-	6.46329	8.3195	3.7508	8.42187	4.37136	9.02244	4.55916	8.8858
AC207628.4_FG010	3:202837296-202838194	828	-	3.35262	1.54667	6.96988	3.78055	0.96408	1.87898	4.97924	2.34112
AC207628.4_FG011	3:202844173-202857236	2443	+	15.8044	7.17026	13.3441	8.92128	9.35997	8.71422	11.1318	4.90573
AC207649.3_FG002	6:5719727-5721990	531	-	0	0	0	0	0	0	0	0
AC207652.3_FG001	3:38166788-38180088	4058	-	4.78839	7.69369	3.29901	4.84255	5.37904	5.22161	5.12603	4.95027
AC207655.2_FG003	7:136978750-136983343	699	-	0.111858	0.461761	0	0	0	0	0	0
AC207656.3_FG002	5:49251849-49256054	3789	+	22.917	23.3163	22.2556	20.0287	23.9086	23.2945	19.7865	22.8503	ARF
AC207722.2_FG009	7:147057396-147058184	789	-	3.95835	0.874868	19.2098	0.237546	2.23023	0.118065	1.97639	0.238153
AC207728.2_FG003	6:126342288-126449383	3063	-	1.57419	0.995107	1.77814	2.9379	1.4677	2.71841	1.15353	1.79371
AC207732.3_FG010	2:186693256-186693885	630	-	0	0.269657	0.103169	0	0.118471	0.163519	0.105557	0.164868
AC207733.3_FG001	2:126391039-126396250	1410	+	0	0	0	0.113901	0	0	0	0
AC207733.3_FG007	2:126392268-126393148	738	-	0	0	0	0	0	0	0	0
AC207740.3_FG005	3:4877173-4877422	177	+	0	0	0	0	0	0	0	0
AC207755.3_FG005	10:6163581-6165882	1127	-	1.7034	2.17986	9.76614	2.54441	5.26348	5.74052	4.46205	2.66301
AC207756.3_FG001	4:144473602-144477187	937	+	12.7221	9.61429	8.95085	17.3162	10.9493	10.2943	10.4367	8.7037
AC207767.2_FG001	3:192454504-192457951	2133	+	0.112498	0.115779	0.0888413	0	0.128705	0.105739	0.135513	0.0711454
AC207784.3_FG007	8:72535439-72536275	837	+	0	0	0	0	0	0	0	0
AC207790.2_FG001	6:108854641-108855493	624	-	0	0	0	0	0	0	0	0
AC207793.3_FG002	3:98604282-98604614	333	-	0	0	0	0	0	1.7465	0	0
AC207798.2_FG003	6:128483794-128485104	657	+	0	0	0	0	0	0	0	0
AC207803.3_FG003	UNKNOWN:5632196-5650483	4405	+	37.3974	41.3128	22.5024	49.32	38.8148	59.3244	34.8986	47.9794
AC207814.3_FG002	3:58536324-58537469	1146	+	0	0	0	0	0	0	0	0
AC207814.3_FG003	3:58532609-58535597	2058	-	0.351227	0.331358	0	0	0	0	0.517164	0.0740389
AC207888.3_FG009	2:234264112-234266163	2052	+	0.088094	0.453332	0.0231905	0.629449	0	0.184011	0.0471689	0.148562	LBD
AC207890.3_FG002	4:94431219-94439333	3947	+	244.719	185.448	82.3649	265.294	236.719	358.815	173.722	350.531
AC207896.4_FG003	3:58651847-58652239	393	-	0	0	0	0	0	0	0	0
AC208023.3_FG001	9:108706917-108710771	973	+	499.287	343.216	461.434	515.989	588.862	377.707	345.43	379.623
AC208026.3_FG005	1:196659132-196660940	867	-	0	0.0855036	0.0655125	0.104522	0	0.103897	0.0668384	0.209597
AC208031.3_FG002	7:129866108-129867049	594	+	0.572176	0.591111	0.226075	0.540591	0.12966	0.716539	0	2.16703
AC208031.3_FG005	7:129876216-129879378	477	+	0.207508	0	0	0	0.374172	0.779248	0.337224	0.523388
AC208035.3_FG002	2:160157080-160157544	465	+	0	0	0	0	0	0	0	0
AC208042.3_FG005	8:745609-746385	777	-	0	0	0	0	0	0	0	0
AC208079.3_FG001	10:44979737-44980144	408	+	0	0	0	0	0	0	0	0
AC208082.3_FG008	5:13990518-13993571	606	-	0	0	0	0	0	0	0	0
AC208109.2_FG004	7:31511710-31515064	810	+	0	0	0	0	0	0	0	0
AC208110.2_FG001	10:140656185-140659057	1584	+	0.0394206	0.0811705	0.0622677	0	0.0720887	0.148205	0	0	WRKY
AC208110.2_FG005	10:140721590-140722713	1071	+	0	0	0	0	0	0	0	0
AC208110.2_FG006	10:140736174-140741028	3666	+	0.765459	1.46241	1.06091	0.827392	0.658368	0.900683	1.19087	1.26481
AC208110.2_FG007	10:140741826-140743194	369	-	148.184	116.584	131.309	60.832	55.0588	35.13	64.5028	33.72
AC208110.2_FG011	10:140727537-140729607	1734	+	0.0355218	0	0.196378	0.0447877	0.357391	0.489685	0.256869	0.0449234
AC208113.3_FG001	1:263056025-263057088	462	+	0	0	0	0	0	0	0.179101	0
AC208113.3_FG005	1:262997973-262999127	1155	+	1.12376	1.92448	0	0.293197	0.752226	0	0.657879	0.512836
AC208113.3_FG009	1:263047262-263048970	1518	+	0.715372	1.71172	1.82835	1.51905	1.45894	1.17065	5.12617	8.84816
AC208122.2_FG003	4:144175828-144201788	702	-	0	0	0	0	0	0	0	0
AC208126.3_FG001	4:235746306-235746728	306	-	6.68629	151.796	68.3792	106.323	32.8829	49.3147	89.2815	12.1862
AC208201.3_FG001	1:45400236-45402380	1014	+	19.6118	14.1471	18.1091	16.3671	24.2435	21.2681	15.8451	19.1478
AC208201.3_FG002	1:45366147-45367585	1167	+	2.04232	1.8701	3.31592	2.21703	2.53804	3.48325	2.46484	2.6537
AC208201.3_FG003	1:45337864-45341089	2264	+	0.157977	0.191178	2.12043	0.232343	0.843325	0.139624	2.08003	0.166478
AC208204.3_FG006	1:38637065-38637541	477	+	975.704	253.078	161.576	196.994	193.073	129.355	197.276	226.365
AC208212.3_FG001	3:122780181-122780854	492	-	0	1.01513	0	0	0	0	0	0
AC208217.3_FG001	5:84252018-84516345	849	-	26.3742	19.3323	30.2601	31.5433	29.3714	32.9056	32.2116	47.1072
AC208221.3_FG002	2:37901719-37904325	744	+	15.5496	51.8212	10.3453	10.442	5.95488	4.61327	0.165108	0.129235
AC208308.3_FG003	1:155342107-155343199	480	-	0	0.212366	0	0	0	0	0	0
AC208308.3_FG004	1:155392124-155392609	486	-	0	0	0	0	0	0.251058	0	0
AC208327.4_FG002	8:126449851-126452292	570	+	1.06946	0.789436	3.50139	1.73201	1.93722	3.25234	0.247395	0
AC208327.4_FG003	8:126490835-126504544	1677	+	56.5082	37.0813	42.3029	46.458	57.4751	58.5419	47.6103	59.7076
AC208327.4_FG006	8:126550034-126552768	1855	-	14.5412	18.68	17.6643	18.5048	15.1422	13.0947	19.6888	14.4277
AC208337.2_FG003	7:10786267-10792717	4263	-	1.8995	3.33821	1.53478	10.0338	2.835	1.53759	0.261517	0.491543
AC208338.3_FG010	6:82779241-82782818	984	+	0	0	0	0	0	0	0	0.266468
AC208341.4_FG005	8:96347085-96347585	501	-	35.5204	33.019	35.2833	35.4003	30.5278	22.353	29.7541	22.2845
AC208341.4_FG006	8:96350079-96361126	1054	-	0.844188	1.72513	1.34748	1.87825	1.2917	0.729546	0.716873	0.858711
AC208341.4_FG007	8:96253905-96254996	855	-	0	0	0	0	0	0	0	0
AC208341.4_FG008	8:96265428-96267691	807	-	0.274105	0.471605	0.144365	0.11515	0.166359	0.114463	0.736805	0
AC208346.3_FG004	3:183576733-183578676	1944	-	12.8238	10.5014	9.56084	8.06507	9.02144	9.22845	11.4035	10.5365
AC208348.3_FG012	5:216695478-216697052	1575	+	1.5476	2.00188	0.971549	1.65104	2.46721	2.18808	2.0411	1.95707
AC208358.3_FG005	4:60019724-60024654	1906	-	0.0344278	0.098514	0.478723	0	0.116758	0.258904	0.0768837	0.0435417
AC208406.3_FG004	8:103831393-103831659	267	+	8.67892	6.93958	18.096	6.70857	12.7653	14.8404	6.54808	10.7933
AC208411.3_FG013	5:147905575-147907439	756	-	0	0	0.0790209	0	0	0.250586	0	0.12636
AC208418.3_FG009	4:219494930-219496508	1155	+	0	0	0	0	0	0	0	0
AC208422.3_FG001	2:149005956-149006868	552	-	0	0	0	0	0	0	0	0
AC208422.3_FG002	2:149028678-149029641	603	-	0	0	0	0	0	0	0	0
AC208423.3_FG002	4:10092613-10094349	927	-	0	0	0	0	0	0	0	0
AC208434.3_FG001	1:204366162-204369690	993	-	0	0	0	0	0	0.0870265	0	0	C3H
AC208434.3_FG007	1:204433981-204435070	972	-	0	0	0.0563934	0.179974	0	0	0	0.0902333
AC208436.3_FG007	1:45098844-45109608	4330	+	0.553937	2.23562	1.20412	1.93525	1.24868	1.51353	1.4649	1.07955
AC208440.3_FG003	1:227436670-227452453	3617	-	10.2003	10.5846	6.53905	9.52787	10.2046	10.2893	11.1091	12.0685
AC208445.3_FG001	1:172509257-172509502	246	+	0	0	0	0	0	0	0	0
AC208445.3_FG006	1:172558791-172559036	246	+	0	0	0	0	0	0	0	0
AC208453.3_FG003	1:146249687-146250489	633	-	0	0	0	0	0	0	0	0
AC208454.3_FG002	5:7603580-7604419	840	+	0	0	0	0.109051	0	0	0	0
AC208458.3_FG011	4:131752253-131752684	432	-	0.502035	0	0	0	0	0	0	0.31634
AC208516.2_FG008	5:188203926-188204342	417	+	0	0	0	0	0	0	0	0
AC208521.3_FG002	6:55385154-55395304	2628	+	7.83037	7.80858	14.9388	10.0357	7.51914	7.76207	8.71308	7.17072
AC208530.3_FG003	1:253003404-253005264	1152	+	0	0	0	0	0	0	0	0
AC208539.3_FG002	5:202930664-202931464	801	+	0	0.704846	0	0	0	1.03244	0.586609	0
AC208539.3_FG003	5:202936520-202937053	534	+	0	0	0	0	0	0	0	0
AC208559.3_FG003	4:125108205-125110893	912	-	0.853134	0.719551	0.980266	0.586529	0.848254	1.2632	0	0
AC208564.3_FG004	1:186736360-186737646	384	+	0	0	0	0	0	0	0	0
AC208571.4_FG001	1:50628458-50712412	3856	+	7.7029	7.78166	9.7669	5.49478	11.24	8.55886	9.8322	6.11654
AC208576.3_FG001	1:63590507-63591874	1368	-	0.140466	0.0482434	0	0	0.128352	0	0.112952	0
AC208577.3_FG005	5:174941523-174942072	495	+	4.6573	2.81144	0	0	0	0	0	0
AC208579.3_FG001	10:144692132-144695657	1089	-	0	0	0.244105	0.155828	0.70982	0.399947	0	0
AC208606.3_FG007	2:111194692-111196748	825	+	0	0	0	0	0	0	0	0
AC208610.3_FG010	2:236726546-236727049	504	-	0	0	0	0	0	0	0	0.474235
AC208625.3_FG004	10:94943457-94944123	309	-	0	0	0	0	0	0	0	0
AC208630.3_FG001	5:49058343-49058885	543	+	0	0	0	0	0	0	0	0
AC208641.3_FG009	4:11626864-11629343	780	+	0	0	0	0	0	0	0	0
AC208644.2_FG005	1:205149650-205149817	168	+	0	0	0	0	0	0	0	0
AC208649.4_FG003	10:19376619-19380010	1053	+	0	0	0	0	0	0	0	0
AC208663.3_FG002	2:29926105-29927193	1089	+	0	0	0	0	0	0	0.0497463	0	NAC
AC208678.3_FG002	1:139449486-139450308	408	-	0	0	0	0	0	0	0	0
AC208680.3_FG001	1:96208211-96208840	630	+	0	0.269657	0.515842	0	0	0	0	0
AC208702.3_FG007	1:204949444-204949671	228	+	0	0	0	0	0	0	0	0
AC208711.3_FG005	6:96189684-96191509	1788	+	0	0	0.162541	0.259497	0.282386	0.386879	0	0
AC208724.3_FG001	4:230214450-230217325	798	+	0.278356	0.0956961	0.36864	0.584667	1.21199	0.949671	0.299318	0.353626
AC208826.3_FG003	7:41914107-41915154	585	-	0	0	0	0	0	0.183516	0.118602	0
AC208826.3_FG004	7:41829770-41830300	531	+	0.858894	1.24343	0	0	1.08734	1.72062	0.139253	0
AC208848.3_FG005	3:110524404-110524889	486	-	0	0	0	0	0	0	0	0
AC208855.3_FG002	10:39915791-39916033	243	+	0	30.9013	0	4.96184	0	0	0	0
AC208860.3_FG002	9:140716307-140719269	861	+	0.0837033	0.0863029	1.78534	1.47694	0.457498	0.734052	0.0674649	0.634644
AC208892.3_FG005	2:216320371-216325621	3892	+	0.681192	0.573835	5.50488	3.46531	1.09222	0.911188	1.51762	0.575731
AC208895.3_FG001	3:33251694-33258626	1896	+	0	0	0	0	0	0	0	0
AC208895.3_FG004	3:33198291-33204399	1605	+	0	0	0	0	0	0	0	0
AC208897.3_FG003	1:27116408-27120653	1590	+	0.117745	0.565706	0.371973	0.247424	0.287098	0.0983715	0.2208	0.198533
AC208897.3_FG004	1:27121864-27127600	1790	-	0.376827	0.670008	0.189384	1.07983	0.626729	0.482712	0.440364	1.26659
AC208905.3_FG004	9:18947410-18947685	276	-	0	0.974119	0	0	0	0	0	0
AC208915.3_FG010	3:223452808-223453587	780	+	0	0.0987675	0	0	0	0	0	0
AC208916.3_FG003	6:150103861-150104526	666	+	0	0.495863	0.284652	0.756527	0.32718	0.752042	0	0.454981
AC208920.3_FG001	4:78255913-78256595	516	+	0	0	0.285185	0	0.163019	0	0.14633	0
AC208930.3_FG007	3:129214698-129217288	672	-	1.65902	1.46788	0.655417	0.447931	0.107635	0.5937	0	0.448988
AC208974.3_FG001	1:101447078-101449378	618	-	0	0	0	0	0	0	0	0
AC209015.3_FG004	6:102323695-102324231	537	-	0	0	0	0	0	0	0	0
AC209016.3_FG010	1:297256292-297260320	939	-	0	0	0	0	0	0	0	0
AC209029.2_FG002	4:20938296-20941034	879	+	0	0	0	0.102627	0	0	0	0
AC209050.3_FG001	6:96391845-96395699	2775	+	0	0	0	0	0	0	0	0
AC209050.3_FG003	6:96329344-96330904	1398	+	0	0	0	0	0.166804	0	0	0	WRKY
AC209051.3_FG003	5:170765924-170768961	1443	+	0	0	0	0	0	0	0	0
AC209062.3_FG002	5:54193943-54194686	744	-	0	0	0	0	0	0	0	0
AC209073.3_FG001	8:161316880-161317101	222	-	0	0	0	0	0	0	0	0
AC209073.3_FG002	8:161317717-161320784	1203	-	0	0	0	0	0	0	0	0
AC209074.3_FG007	8:164924251-164928829	1059	-	0	0	0	0	0	0	0.051527	0.0809155
AC209080.3_FG004	3:179374734-179380428	1023	-	0.601844	0.895829	4.01448	3.70891	2.19611	4.44072	0.376877	1.8596
AC209093.3_FG006	3:190768577-190771798	726	-	0	0	0	0	0	0	0	0
AC209168.3_FG007	5:189915062-189915517	456	-	0	0	0	0.284215	0	0	0	0
AC209169.3_FG007	2:2419124-2419414	291	+	0.731633	0.770895	0	0	0	0	2.46299	0.914919
AC209177.3_FG001	5:75956269-75956640	372	-	1.04527	1.44972	2.20514	0.437783	1.55248	0.435712	0.857279	0
AC209206.3_FG004	10:137576828-137577532	705	+	0	0	0	0	0	0	0.178408	0.139552
AC209206.3_FG011	10:137479572-137488263	4032	+	6.58817	8.18662	7.85662	8.19522	6.24769	10.0296	11.3482	9.58727
AC209206.3_FG014	10:137458157-137460710	1641	-	29.0088	16.6978	131.422	20.9396	78.446	54.6297	110.59	9.25301
AC209208.3_FG001	5:193306800-193319884	6773	-	5.94138	3.96409	4.33022	6.20075	4.82669	5.87053	6.2961	7.97963
AC209208.3_FG002	5:193306271-193309603	1212	+	254.861	177.794	322.076	188.973	153.772	106.436	214.077	63.6458
AC209208.3_FG003	5:193299213-193301582	2370	+	0.100107	0.463568	0.098821	0.0946733	0.572775	0.439129	0.180853	0.348216
AC209208.3_FG004	5:193282803-193284461	1602	-	0	0	0	0	0	0	0	0
AC209208.3_FG005	5:193233378-193240337	1426	-	27.6998	18.7081	33.0385	24.2595	26.8635	24.8222	27.0659	27.4623
AC209212.3_FG005	1:299683657-299686317	2661	-	0	0.0112248	0	0	0	0	0.0789973	0
AC209213.4_FG002	1:106121460-106125866	3472	+	4.08722	4.02842	5.24653	5.53731	4.39387	5.46772	6.8285	6.16134
AC209215.4_FG004	1:99994149-100002247	1482	-	0	0	0.0336456	0	0	0	0	0
AC209215.4_FG006	1:100006308-100008129	342	+	0.432289	0	0.342146	0.542173	0	0	0.713065	0
AC209242.3_FG003	4:232129726-232134496	1721	-	19.9209	16.3881	19.6661	15.284	20.0392	17.4667	17.8483	17.6262
AC209257.4_FG003	6:153224357-153228531	3851	+	0.201914	0.109087	1.07227	0.711039	0.416714	0.650023	0.466686	1.327
AC209257.4_FG004	6:153232840-153233260	291	+	0	0	2.89995	0	0	0	0.615747	0
AC209257.4_FG006	6:153233970-153236020	618	+	0.537898	2.77771	2.444	1.1859	0.73188	2.02096	0.869971	1.52812	ERF
AC209257.4_FG008	6:153242562-153243215	654	+	7.90981	5.61329	5.99796	3.16839	6.02559	5.31511	2.85534	1.1586
AC209332.3_FG011	5:21027086-21029945	1593	-	0	0.040341	0	0.0613546	0.0358093	0.147236	0	0.0495259
AC209356.4_FG001	4:235888891-235889255	267	+	0	0	55.1498	0	3.64724	0	8.41896	0
AC209364.3_FG004	3:225864555-225867272	2718	+	0.0215463	0.08867	0.0850669	0.244501	0.157827	0.13501	0	0.109009
AC209364.3_FG007	3:225778033-225778584	552	+	0.482995	0.332852	0	0	0.291433	0.604783	0	0
AC209364.3_FG009	3:225759509-225760204	696	-	1.46327	1.85866	3.20159	0.850982	1.94348	1.1279	1.36341	1.70606
AC209374.4_FG002	5:196279079-196295855	3050	-	13.8001	12.9776	13.9071	13.1117	13.435	12.0094	17.8211	18.2761
AC209377.3_FG003	3:137530090-137530581	492	-	0.392348	1.42118	1.86081	0.494036	0.354067	0.24558	2.07069	1.23723
AC209381.3_FG002	3:153638346-153639176	831	-	0	0	0	0	0	0	0	0
AC209381.3_FG007	3:153759889-153760689	801	-	0	0	0	0	0	0	0	0
AC209438.4_FG002	1:58610125-58610701	267	+	0	0	0	0	0	0	0	0
AC209460.3_FG002	1:54821254-54850765	2525	+	58.0339	46.2151	61.0987	50.2664	73.8461	54.6971	59.2041	71.8647
AC209463.4_FG013	5:216505297-216506334	1038	-	0.393895	0.405885	0.0518562	0	0.119788	0.658051	0.739917	0.663871
AC209624.2_FG001	2:83169346-83192383	3563	+	1.2104	1.54147	2.88851	0.839397	0.844737	1.54045	4.39025	0.126187
AC209626.2_FG013	1:17884404-17885816	707	+	34.5472	24.5157	19.5541	29.7991	27.7784	20.2555	28.4497	50.0672
AC209629.2_FG003	6:118752439-118752933	495	-	0	0	0	0	0	0	0	0
AC209629.2_FG007	6:118703532-118704951	981	+	0	0	0	0	0	0	0	0
AC209636.2_FG003	6:146567633-146568712	1080	+	0	0.514776	0.0493305	0.314905	0	0.156506	0.150802	0.157895
AC209647.2_FG001	8:53118786-53119277	492	-	0	0	0	0	0	0	0	0
AC209647.2_FG002	8:53111205-53111501	297	-	0	0.711506	0	0	0	0	0	1.69351
AC209651.2_FG001	9:32510646-32511143	498	-	0.191979	0	0	0.483489	0.693236	0.480673	0	0
AC209664.3_FG002	9:4651553-4654530	1506	+	14.5069	6.97333	16.7405	7.43203	13.3	6.65367	15.2901	9.19876
AC209675.3_FG001	1:36693699-36693953	255	+	0	1.53343	1.13456	0	1.16972	0	0	3.52772
AC209697.3_FG005	9:45736675-45737184	510	-	0.55232	0	0	0	0	0	0.149367	0.696811
AC209698.3_FG004	1:195144976-195145377	402	+	0	0	0	0	0	0	0	0
AC209704.3_FG003	2:47856951-47858091	948	+	0	0	0	0	0	0	0	0
AC209705.3_FG004	9:70955800-71000805	4744	-	15.0763	10.1994	13.0512	12.2563	15.2328	14.9145	16.1305	12.9006
AC209710.4_FG002	7:27120843-27122017	474	-	0	0	0	0	0	0	0	0
AC209718.1_FG009	3:5565724-5567649	1926	+	0	0	0	0	0	0	0	0
AC209723.3_FG003	7:79257319-79258143	825	+	0	0.0914312	0	0.111741	0	0	0	0
AC209723.3_FG004	7:79207720-79211150	882	+	0	0	0	0	0	0	0	0
AC209729.3_FG003	3:219872008-219874983	2913	+	0.0399708	0.0411504	0	0.0252131	0.0183175	0.100208	0.0160416	0
AC209732.3_FG001	4:85394515-85401130	1026	-	0	0	0.052626	0.0839808	0	0	0	0
AC209734.3_FG005	6:136955292-136955672	381	-	0	0	0	0	0	0	0	0
AC209737.3_FG006	8:166574701-166575351	651	+	0	0	0	0	0	0	0	0
[truncated: 39,547 more rows]
