# Supplementary material for: Comparative transcriptomics reveals the difference in early endosperm development between maize with different amylose contents
Source: PeerJ. 2019 Aug 28;7:e7528. doi: 10.7717/peerj.7528 (PMC6717500; doi:10.7717/peerj.7528)
Supplement: Table S4 [file peerj-07-7528-s011.xlsx]

## Sheet: Sheet1
Table S4 Functional enrichment analysis of stage-specific gene expression
SD609 5 DAP
Gene ID	Description	GO Component	GO Function	GO Process
AC190589.2_FG002	PREDICTED: spidroin-1-like [Zea mays]	GO:0044464//cell part	-	-
GRMZM2G008558	PREDICTED: formin-like protein 5 [Oryza sativa Japonica Group]	GO:0005634//nucleus;GO:0009536//plastid;GO:0016020//membrane;GO:0044446//intracellular organelle part;GO:0071944//cell periphery	GO:0005488//binding;GO:0009987//cellular process	-
GRMZM2G017116	PREDICTED: gamma-glutamyl peptidase 5 isoform X1 [Elaeis guineensis]	-	-	-
GRMZM2G017868	PREDICTED: LOW QUALITY PROTEIN: nudix hydrolase 3-like [Populus euphratica]	GO:0005773//vacuole;GO:0005829//cytosol	GO:0005515//protein binding;GO:0008239//dipeptidyl-peptidase activity;GO:0016787//hydrolase activity	GO:0006508//proteolysis
GRMZM2G033192	unknown [Zea mays]	-	-	-
GRMZM2G084054	disease resistance response protein 206 [Zea mays]	GO:0005618//cell wall;GO:0016023//cytoplasmic membrane-bounded vesicle	-	GO:0006950//response to stress;GO:0009698//phenylpropanoid metabolic process;GO:0044238//primary metabolic process;GO:0044249//cellular biosynthetic process;GO:0044283//small molecule biosynthetic process;GO:0065007//biological regulation
GRMZM2G104581	unknown [Zea mays]	-	-	-
GRMZM2G129300	-	-	-	-
GRMZM2G130486	-	-	-	-
GRMZM2G132862	PREDICTED: uncharacterized protein LOC103654895 [Zea mays]	GO:0005739//mitochondrion	-	-
GRMZM2G143010	hypothetical protein ZEAMMB73_Zm00001d035927 [Zea mays]	-	-	-
GRMZM2G150122	hypothetical protein ZEAMMB73_Zm00001d012004 [Zea mays]	-	-	-
GRMZM2G158758	-	-	-	-
GRMZM2G172555	uncharacterized LOC100383109 [Zea mays]	GO:0009536//plastid	-	-
GRMZM2G174136	myosin-binding protein 7-like [Aegilops tauschii subsp. tauschii] [Aegilops tauschii]	GO:0044464//cell part	-	GO:0003006//developmental process involved in reproduction;GO:0009791//post-embryonic development;GO:0048856//anatomical structure development;GO:0050896//response to stimulus
GRMZM2G176354	-	-	-	-
GRMZM2G180155	glucosamine fructose-6-phosphate aminotransferase1 [Zea mays]	GO:0005739//mitochondrion;GO:0005829//cytosol	GO:0005488//binding;GO:0004360//glutamine-fructose-6-phosphate transaminase (isomerizing) activity;GO:0030246//carbohydrate binding	GO:0044711//single-organism biosynthetic process;GO:0009058//biosynthetic process;GO:0008152//metabolic process;GO:0044238//primary metabolic process;GO:0044710//single-organism metabolic process;GO:0044699//single-organism process;GO:0006042//glucosamine biosynthetic process;GO:0006094//gluconeogenesis;GO:0007010//cytoskeleton organization;GO:0010498//proteasomal protein catabolic process
GRMZM2G319402	Os09g0101100 [Oryza sativa Japonica Group]	-	GO:0003824//catalytic activity	GO:0006284//base-excision repair
GRMZM2G373272	PREDICTED: FAS1 domain-containing protein SELMODRAFT_448915 [Beta vulgaris subsp. vulgaris] [Beta vulgaris]	GO:0016023//cytoplasmic membrane-bounded vesicle	-	-
GRMZM2G413066	Remorin family protein [Zea mays]	-	-	-
GRMZM2G415228	-	-	-	-
GRMZM2G437675	-	-	-	-
GRMZM2G438045	PREDICTED: ribosome production factor 2 homolog [Nicotiana attenuata]	GO:0005634//nucleus;GO:0005730//nucleolus;GO:0005829//cytosol	-	GO:0001510//RNA methylation
GRMZM2G445630	hypothetical protein ZEAMMB73_Zm00001d027902, partial [Zea mays]	-	-	-
GRMZM2G478430	hypothetical protein SORBI_K025800 [Sorghum bicolor]	-	-	-
GRMZM2G547723	-	-	-	-
GRMZM2G550861	transcription factor upbeat1 [Nicotiana attenuata]	-	-	-
GRMZM2G700673	unknown [Zea mays]	-	-	-
GRMZM2G701367	PREDICTED: uncharacterized protein LOC103649791 [Zea mays]	-	-	-
GRMZM2G702103	-	-	-	-
GRMZM2G703196	Vegetative cell wall protein gp1 (Precursor)	GO:0016020//membrane;GO:0032991//macromolecular complex;GO:0043229//intracellular organelle;GO:0044444//cytoplasmic part	GO:0097159//organic cyclic compound binding	GO:0009611//response to wounding
GRMZM2G704100	-	-	-	-
GRMZM5G811034	cyclin-dependent kinase B2-1 [Aegilops tauschii subsp. tauschii] [Aegilops tauschii]	GO:0000307//cyclin-dependent protein kinase holoenzyme complex;GO:0005634//nucleus;GO:0005819//spindle;GO:0005829//cytosol;GO:0009524//phragmoplast;GO:0009574//preprophase band;GO:0010005//cortical microtubule, transverse to long axis;GO:0016023//cytoplasmic membrane-bounded vesicle	GO:0016772//transferase activity, transferring phosphorus-containing groups;GO:0004672//protein kinase activity;GO:0016301//kinase activity;GO:0016740//transferase activity;GO:0003824//catalytic activity;GO:0097159//organic cyclic compound binding;GO:0032550//purine ribonucleoside binding;GO:0001883//purine nucleoside binding;GO:1901363//heterocyclic compound binding;GO:0005488//binding;GO:009736…	GO:0043170//macromolecule metabolic process;GO:0071704//organic substance metabolic process;GO:0044763//single-organism cellular process;GO:0008152//metabolic process;GO:0044237//cellular metabolic process;GO:0043412//macromolecule modification;GO:0009987//cellular process;GO:0044267//cellular protein metabolic process;GO:0044238//primary metabolic process;GO:0044699//single-organism process;GO:0…
GRMZM5G812253	-	-	-	-
GRMZM5G829663	EIN3-binding F-box protein 1 [Anthurium amnicola]	-	-	-
GRMZM5G834286	unknown [Zea mays]	-	-	-
GRMZM5G840762	unknown [Zea mays]	-	-	-
GRMZM5G854511	unknown [Zea mays]	-	-	-
GRMZM5G862602	unknown [Zea mays]	-	-	-
GRMZM5G866940	PREDICTED: 50S ribosomal protein L2, chloroplastic-like [Oryza sativa Japonica Group]	GO:0044424//intracellular part;GO:0005622//intracellular;GO:0044446//intracellular organelle part;GO:0005840//ribosome;GO:0044444//cytoplasmic part;GO:0044391//ribosomal subunit;GO:1990904//ribonucleoprotein complex;GO:0043227//membrane-bounded organelle;GO:0005737//cytoplasm;GO:0044464//cell part;GO:0044422//organelle part;GO:0030529//intracellular ribonucleoprotein complex;GO:0043231//intracell…	GO:0003824//catalytic activity;GO:0005198//structural molecule activity;GO:0016740//transferase activity;GO:0019843//rRNA binding;GO:0051788//response to misfolded protein;GO:0080129//proteasome core complex assembly	GO:0008152//metabolic process;GO:0071704//organic substance metabolic process;GO:0010467//gene expression;GO:0043170//macromolecule metabolic process;GO:0006354//DNA-dependent transcription, elongation;GO:0006412//translation;GO:0006511//ubiquitin-dependent protein catabolic process
GRMZM5G881349	-	-	-	-
GRMZM2G582044	-	-	-	-
SD609 10 DAP
Gene ID	Description	GO Component	GO Function	GO Process
AC197267.3_FG001	Vicilin-like seed storage protein [Zea mays]	-	-	-
AC197541.3_FG009	Pectin acetylesterase 5 [Dichanthelium oligosanthes]	-	-	-
AC208212.3_FG001	-	-	-	-
GRMZM2G002498	40S ribosomal protein S23 [Zea mays]	GO:0032991//macromolecular complex;GO:0005840//ribosome;GO:0043229//intracellular organelle;GO:0043228//non-membrane-bounded organelle;GO:0044424//intracellular part;GO:0043232//intracellular non-membrane-bounded organelle;GO:0005622//intracellular;GO:0044446//intracellular organelle part;GO:0044422//organelle part;GO:0030529//intracellular ribonucleoprotein complex;GO:0044464//cell part;GO:00443…	GO:0043167//ion binding;GO:0005488//binding;GO:0043169//cation binding;GO:0046872//metal ion binding;GO:0046914//transition metal ion binding;GO:0005515//protein binding	GO:0010468//regulation of gene expression;GO:0019222//regulation of metabolic process;GO:0065007//biological regulation;GO:0050789//regulation of biological process;GO:0060255//regulation of macromolecule metabolic process
GRMZM2G005229	PREDICTED: vesicle transport protein GOT1 [Elaeis guineensis]	-	-	-
GRMZM2G006112	PREDICTED: endochitinase A1-like [Oryza sativa Japonica Group]	GO:0044464//cell part	-	GO:0044238//primary metabolic process;GO:0044260//cellular macromolecule metabolic process
GRMZM2G006562	AM3 [Zea mays]	GO:0016023//cytoplasmic membrane-bounded vesicle	-	GO:0016998//cell wall macromolecule catabolic process
GRMZM2G009998	-	-	-	-
GRMZM2G011115	PREDICTED: hypersensitive-induced response protein 1 [Oryza sativa Japonica Group]	GO:0005634//nucleus;GO:0005739//mitochondrion;GO:0005774//vacuolar membrane;GO:0005794//Golgi apparatus;GO:0005829//cytosol;GO:0005886//plasma membrane;GO:0009506//plasmodesma;GO:0009507//chloroplast	GO:0004672//protein kinase activity;GO:0043424//protein histidine kinase binding	GO:0006612//protein targeting to membrane;GO:0006944//cellular membrane fusion;GO:0010075//regulation of meristem growth;GO:0010167//response to nitrate;GO:0010363//regulation of plant-type hypersensitive response;GO:0015706//nitrate transport;GO:0019344//cysteine biosynthetic process;GO:0030003//cellular cation homeostasis;GO:0030968//endoplasmic reticulum unfolded protein response;GO:0043069//n…
GRMZM2G041513	hypothetical protein ZEAMMB73_Zm00001d025709 [Zea mays]	GO:0016023//cytoplasmic membrane-bounded vesicle	-	-
GRMZM2G042980	10A19I.15 [Zea mays]	-	-	-
GRMZM2G051460	PREDICTED: transcription factor IIIB 90 kDa subunit-like [Zea mays]	-	-	-
GRMZM2G060057	LSD1-type zinc finger protein [Medicago truncatula]	GO:0005634//nucleus	GO:0005488//binding	GO:0009628//response to abiotic stimulus;GO:0009814//defense response, incompatible interaction;GO:0009863//salicylic acid mediated signaling pathway;GO:0009873//ethylene mediated signaling pathway;GO:0031323//regulation of cellular metabolic process;GO:0034051//negative regulation of plant-type hypersensitive response;GO:0034052//positive regulation of plant-type hypersensitive response;GO:00346…
GRMZM2G060255	PREDICTED: universal stress protein family protein isoform X1 [Zea mays]	-	-	GO:0006950//response to stress
GRMZM2G060715	hypothetical protein ZEAMMB73_Zm00001d035678 [Zea mays]	-	-	-
GRMZM2G067042	cycloartenol synthase [Panax notoginseng]	GO:0005739//mitochondrion;GO:0016021//integral to membrane	GO:0016853//isomerase activity;GO:0003824//catalytic activity;GO:0016871//cycloartenol synthase activity;GO:0042299//lupeol synthase activity;GO:0042300//beta-amyrin synthase activity	GO:0006694//steroid biosynthetic process;GO:0008152//metabolic process;GO:0010686//tetracyclic triterpenoid biosynthetic process;GO:0019745//pentacyclic triterpenoid biosynthetic process;GO:0042335//cuticle development
GRMZM2G071223	expressed protein [Oryza sativa Japonica Group]	GO:0005739//mitochondrion;GO:0016023//cytoplasmic membrane-bounded vesicle	-	-
GRMZM2G091595	PREDICTED: exosome complex component RRP42 [Phoenix dactylifera]	-	GO:0000175//3'-5'-exoribonuclease activity;GO:0003723//RNA binding	GO:0006950//response to stress;GO:0044238//primary metabolic process;GO:0006725//cellular aromatic compound metabolic process;GO:0044249//cellular biosynthetic process;GO:0044260//cellular macromolecule metabolic process;GO:0006259//DNA metabolic process;GO:1901576//organic substance biosynthetic process;GO:0046483//heterocycle metabolic process;GO:0051716//cellular response to stimulus;GO:004317…
GRMZM2G093262	hypothetical protein ZEAMMB73_Zm00001d051731 [Zea mays]	-	-	-
GRMZM2G095411	PREDICTED: protein SENESCENCE-ASSOCIATED GENE 21, mitochondrial-like [Oryza brachyantha]	-	-	GO:0006950//response to stress
GRMZM2G105579	hypothetical protein [Zea mays]	-	-	-
GRMZM2G112951	uncharacterized protein LOC100193075 [Zea mays]	-	-	-
GRMZM2G113235	-	-	-	-
GRMZM2G114503	protein RADIALIS-like 3 [Ananas comosus]	GO:0005634//nucleus;GO:0005739//mitochondrion;GO:0009507//chloroplast	GO:0003677//DNA binding;GO:0003682//chromatin binding;GO:0003700//sequence-specific DNA binding transcription factor activity	GO:0006355//regulation of transcription, DNA-dependent;GO:0009630//gravitropism;GO:0009793//embryo development ending in seed dormancy;GO:0009908//flower development;GO:0010114//response to red light;GO:0048262//ldetermination of dorsal/ventral asymmetry
GRMZM2G117482	PREDICTED: uncharacterized protein LOC100275099 isoform X1 [Zea mays]	-	-	-
GRMZM2G123480	PREDICTED: uncharacterized protein LOC103626187 [Zea mays]	-	-	-
GRMZM2G140317	uncharacterized protein LOC100216787 precursor [Zea mays]	-	-	-
GRMZM2G146376	protein APEM9-like isoform X2 [Ananas comosus]	GO:0043228//non-membrane-bounded organelle;GO:0043229//intracellular organelle;GO:0005623//cell;GO:0005737//cytoplasm;GO:0044464//cell part;GO:0044424//intracellular part;GO:0043227//membrane-bounded organelle;GO:0044444//cytoplasmic part;GO:0043231//intracellular membrane-bounded organelle;GO:0043232//intracellular non-membrane-bounded organelle;GO:0043226//organelle;GO:0042579//microbody;GO:000…	GO:0036094//small molecule binding;GO:1901363//heterocyclic compound binding;GO:0016740//transferase activity;GO:0097367//carbohydrate derivative binding;GO:0001883//purine nucleoside binding;GO:0016772//transferase activity, transferring phosphorus-containing groups;GO:0001882//nucleoside binding;GO:0005488//binding;GO:0032550//purine ribonucleoside binding;GO:0032549//ribonucleoside binding;GO:…	GO:0046907//intracellular transport;GO:0044238//primary metabolic process;GO:0006796//phosphate-containing compound metabolic process;GO:0051234//establishment of localization;GO:0006793//phosphorus metabolic process;GO:0044260//cellular macromolecule metabolic process;GO:0051641//cellular localization;GO:0008152//metabolic process;GO:0019538//protein metabolic process;GO:0051649//establishment o…
GRMZM2G149323	hypothetical protein [Zea mays]	-	-	-
GRMZM2G156044	Glyoxalase-like domain-containing protein [Cynara cardunculus var. scolymus] [Cynara cardunculus]	-	GO:0016702//oxidoreductase activity, acting on single donors with incorporation of molecular oxygen, incorporation of two atoms of oxygen;GO:0016829//lyase activity	GO:0044699//single-organism process;GO:0008152//metabolic process;GO:0044710//single-organism metabolic process
GRMZM2G163546	expressed protein [Oryza sativa Japonica Group]	GO:0005739//mitochondrion;GO:0016023//cytoplasmic membrane-bounded vesicle	-	-
GRMZM2G164647	Protein FATTY ACID EXPORT 1 chloroplastic [Zea mays]	-	-	-
GRMZM2G170588	-	-	-	-
GRMZM2G176355	-	-	-	-
GRMZM2G178990	-	-	-	-
GRMZM2G311500	PREDICTED: zinc finger protein ZIC 2-like [Brachypodium distachyon]	-	-	-
GRMZM2G312602	Subtilisin-chymotrypsin inhibitor CI-1C [Aegilops tauschii]	-	GO:0004867//serine-type endopeptidase inhibitor activity	GO:0009611//response to wounding
GRMZM2G342744	hypothetical protein ZEAMMB73_Zm00001d004602 [Zea mays]	GO:0016023//cytoplasmic membrane-bounded vesicle	-	-
GRMZM2G374405	cyclotide precursor protein Mra22, partial [Melicytus ramiflorus]	-	-	GO:0006952//defense response
GRMZM2G397297	Os01g0547400 [Oryza sativa Japonica Group]	-	-	-
GRMZM2G452727	-	-	-	-
GRMZM2G458867	PREDICTED: uncharacterized protein LOC103645340 [Zea mays]	GO:0005739//mitochondrion;GO:0005774//vacuolar membrane;GO:0005829//cytosol;GO:0005886//plasma membrane;GO:0009506//plasmodesma;GO:0009941//chloroplast envelope;GO:0016021//integral to membrane	GO:0005524//ATP binding;GO:0015086//cadmium ion transmembrane transporter activity;GO:0042299//lupeol synthase activity;GO:0042626//ATPase activity, coupled to transmembrane movement of substances	GO:0006200//ATP catabolic process;GO:0006612//protein targeting to membrane;GO:0006855//drug transmembrane transport;GO:0006995//cellular response to nitrogen starvation;GO:0009414//response to water deprivation;GO:0009595//detection of biotic stimulus;GO:0009697//salicylic acid biosynthetic process;GO:0009723//response to ethylene stimulus;GO:0009738//abscisic acid mediated signaling pathway;GO:…
GRMZM2G494910	-	-	-	-
GRMZM2G497870	-	-	-	-
GRMZM2G499432	-	-	-	-
GRMZM2G501802	PREDICTED: uncharacterized protein LOC103634696 [Zea mays]	-	-	-
GRMZM2G531719	hypothetical protein SORBI_004G258900 [Sorghum bicolor]	-	-	-
GRMZM2G560947	BSD domain-containing protein, partial [Cephalotus follicularis]	GO:0009536//plastid	-	-
GRMZM2G568537	PREDICTED: uncharacterized protein LOC100384166 isoform X3 [Zea mays]	-	-	-
GRMZM2G573667	-	-	-	-
GRMZM2G700923	-	-	-	-
GRMZM5G800669	-	-	-	-
GRMZM5G809663	PREDICTED: nuclear transcription factor Y subunit B-4-like [Setaria italica]	GO:0005634//nucleus	GO:0003676//nucleic acid binding;GO:1901363//heterocyclic compound binding;GO:0097159//organic cyclic compound binding;GO:0005515//protein binding;GO:0003677//DNA binding;GO:0046983//protein dimerization activity;GO:0005488//binding;GO:0003700//equence-specific DNA binding transcription factor activity;GO:0043565//sequence-specific DNA binding;GO:0046982//protein heterodimerization activity	GO:0006355//regulation of transcription, DNA-dependent;GO:0009414//response to water deprivation
GRMZM5G826984	-	-	-	-
GRMZM5G828422	Tubby-like F-box protein 2, partial [Zea mays]	GO:0005739//mitochondrion;GO:0044464//cell part	-	-
GRMZM5G838054	-	-	-	-
GRMZM5G848182	Formin-like protein 18 (Precursor) ZEAMMB73_Zm00001d021773 [Zea mays]	-	-	-
GRMZM5G855411	PREDICTED: factor of DNA methylation 1-like [Brachypodium distachyon]	-	GO:0016881//acid-amino acid ligase activity	GO:0031047//gene silencing by RNA
GRMZM5G856002	-	-	-	-
GRMZM5G873459	unknown [Zea mays]	-	-	-
GRMZM5G873581	-	-	-	-
GRMZM5G875735	hypothetical protein ZEAMMB73_Zm00001d002324 [Zea mays]	-	-	-
GRMZM5G879127	PREDICTED: LOW QUALITY PROTEIN: ankyrin repeat domain-containing protein 13C-B [Erythranthe guttata]	-	GO:0005488//binding	-
GRMZM5G887770	-	-	-	-
GRMZM2G567629	-	-	-	-
AC210659.3_FG008	-	GO:0005739//mitochondrion	-	GO:0048367//shoot development
Putative_gene_3918	-	-	-	-
GRMZM2G534175	-	-	-	-
SD609 15 DAP
Gene ID	Description	GO Component	GO Function	GO Process
AC206262.3_FG004	hypothetical protein ZEAMMB73_Zm00001d038628 [Zea mays]	-	-	-
GRMZM2G005886	PREDICTED: (S)-coclaurine N-methyltransferase [Jatropha curcas]	GO:0005737//cytoplasm;GO:0005739//mitochondrion;GO:0005886//plasma membrane	GO:0008168//methyltransferase activity;GO:0008170//N-methyltransferase activity;GO:0008757//S-adenosylmethionine-dependent methyltransferase activity	GO:0007275//multicellular organismal development;GO:0008610//lipid biosynthetic process;GO:0008654//phospholipid biosynthetic process;GO:0009826//unidimensional cell growth;GO:0032259//methylation;GO:0042439//ethanolamine-containing compound metabolic process;GO:0046165//alcohol biosynthetic process;GO:0048868//pollen tube development;GO:0050896//response to stimulus
GRMZM2G006601	LCR [Medicago truncatula]	GO:0016023//cytoplasmic membrane-bounded vesicle	-	-
GRMZM2G016941	Retrotransposon-like protein [Zea mays]	-	-	-
GRMZM2G019721	PREDICTED: glycerol kinase [Elaeis guineensis]	GO:0005737//cytoplasm;GO:0005622//intracellular;GO:0044464//cell part;GO:0044424//intracellular part;GO:0044444//cytoplasmic part;GO:0005623//cell;GO:0005829//cytosol	GO:0016772//transferase activity, transferring phosphorus-containing groups;GO:1901363//heterocyclic compound binding;GO:0005488//binding;GO:0001882//nucleoside binding;GO:0001883//purine nucleoside binding;GO:0097367//carbohydrate derivative binding;GO:0016740//transferase activity;GO:0003824//catalytic activity;GO:0097159//organic cyclic compound binding;GO:0036094//small molecule binding;GO:00…	GO:0044712//single-organism catabolic process;GO:0044723//single-organism carbohydrate metabolic process;GO:0006950//response to stress;GO:0016054//organic acid catabolic process;GO:0006793//phosphorus metabolic process;GO:1901135//carbohydrate derivative metabolic process;GO:0019637//organophosphate metabolic process;GO:0050896//response to stimulus;GO:0044699//single-organism process;GO:0009617…
GRMZM2G025014	Splicing factor U2af small subunit A [Aegilops tauschii]	GO:0044464//cell part;GO:0043226//organelle;GO:0005622//intracellular;GO:0043227//membrane-bounded organelle;GO:0043229//intracellular organelle;GO:0044424//intracellular part;GO:0043231//intracellular membrane-bounded organelle;GO:0005623//cell	GO:0043169//cation binding;GO:0097159//organic cyclic compound binding;GO:0003676//nucleic acid binding;GO:0043167//ion binding;GO:1901363//heterocyclic compound binding;GO:0005488//binding	GO:0006397//mRNA processing;GO:0007067//mitosis;GO:0008380//RNA splicing;GO:0009640//photomorphogenesis;GO:0009793//embryo development ending in seed dormancy;GO:0009845//seed germination;GO:0009909//regulation of flower development;GO:0009933//meristem structural organization;GO:0010162//seed dormancy process;GO:0010182//sugar mediated signaling pathway;GO:0016567//protein ubiquitination;GO:0019…
GRMZM2G043394	PREDICTED: DNA-directed RNA polymerases II, IV and V subunit 11-like [Setaria italica]	GO:0000418//DNA-directed RNA polymerase IV complex;GO:0000419//DNA-directed RNA polymerase V complex;GO:0005665//DNA-directed RNA polymerase II, core complex	GO:0034062//RNA polymerase activity;GO:0016772//transferase activity, transferring phosphorus-containing groups;GO:0097159//organic cyclic compound binding;GO:0016740//transferase activity;GO:1901363//heterocyclic compound binding;GO:0005515//protein binding;GO:0005488//binding;GO:0003676//nucleic acid binding;GO:0016779//nucleotidyltransferase activity;GO:0003824//catalytic activity;GO:0003899//…	GO:0000394//RNA splicing, via endonucleolytic cleavage and ligation;GO:0006366//transcription from RNA polymerase II promoter;GO:0006511//ubiquitin-dependent protein catabolic process;GO:0009086//methionine biosynthetic process;GO:0009616//virus induced gene silencing;GO:0009853//photorespiration;GO:0010050//vegetative phase change;GO:0051788//response to misfolded protein;GO:0080129//proteasome …
GRMZM2G049990	uncharacterized protein LOC100278276 [Zea mays]	GO:0016023//cytoplasmic membrane-bounded vesicle	-	-
GRMZM2G052268	OSIGBa0107A02.1 [Oryza sativa Indica Group]	-	-	-
GRMZM2G066256	-	-	-	-
GRMZM2G069670	hypothetical protein [Zea mays]	-	-	-
GRMZM2G075081	centroradialis [Hordeum vulgare]	GO:0005634//nucleus;GO:0005773//vacuole;GO:0005886//plasma membrane;GO:0031982//vesicle	GO:0003700//sequence-specific DNA binding transcription factor activity;GO:0003712//transcription cofactor activity;GO:0008429//phosphatidylethanolamine binding	GO:0000041//transition metal ion transport;GO:0006623//protein targeting to vacuole;GO:0009737//response to abscisic acid stimulus;GO:0009744//response to sucrose stimulus;GO:0009910//negative regulation of flower development;GO:0009911//positive regulation of flower development;GO:0010030//positive regulation of seed germination;GO:0010229//inflorescence development;GO:0030154//cell differentiat…
GRMZM2G079397	PREDICTED: dolichyl-diphosphooligosaccharide--protein glycosyltransferase subunit 4A [Citrus sinensis]	GO:0005789//endoplasmic reticulum membrane;GO:0009507//chloroplast;GO:0016021//integral to membrane;GO:0016023//cytoplasmic membrane-bounded vesicle	-	-
GRMZM2G081090	DUF4408 domain-containing protein [Cephalotus follicularis]	-	-	GO:0007165//signal transduction;GO:0007275//multicellular organismal development;GO:0048856//anatomical structure development
GRMZM2G082026	PREDICTED: LOW QUALITY PROTEIN: NADH dehydrogenase [ubiquinone] complex I, assembly factor 7 [Arachis duranensis]	GO:0005739//mitochondrion	GO:0008270//zinc ion binding	GO:0015979//photosynthesis;GO:0045333//cellular respiration
GRMZM2G103236	10 kDa chaperonin [Ananas comosus]	GO:0009570//chloroplast stroma	-	GO:0009987//cellular process;GO:0044237//cellular metabolic process;GO:0044238//primary metabolic process;GO:0008152//metabolic process;GO:0044267//cellular protein metabolic process;GO:0071704//organic substance metabolic process;GO:0044260//cellular macromolecule metabolic process;GO:0043170//macromolecule metabolic process;GO:0019538//protein metabolic process;GO:0006457//protein folding
GRMZM2G106143	PREDICTED: ubiquitin-conjugating enzyme E2 28 [Solanum tuberosum]	GO:0016023//cytoplasmic membrane-bounded vesicle	-	GO:0007267//cell-cell signaling;GO:0010375//stomatal complex patterning;GO:0016556//mRNA modification;GO:2000123//positive regulation of stomatal complex development
GRMZM2G107818	hypothetical protein ZEAMMB73_Zm00001d034168 [Zea mays]	-	-	-
GRMZM2G115133	PREDICTED: EPIDERMAL PATTERNING FACTOR-like protein 9 [Zea mays]	-	-	-
GRMZM2G126700	PREDICTED: dual specificity protein kinase shkB isoform X2 [Oryza sativa Japonica Group]	-	GO:0016740//transferase activity;GO:0032550//purine ribonucleoside binding;GO:0001883//purine nucleoside binding;GO:0016301//kinase activity;GO:0001882//nucleoside binding;GO:0003824//catalytic activity;GO:0016773//phosphotransferase activity, alcohol group as acceptor;GO:0016772//transferase activity, transferring phosphorus-containing groups;GO:0005488//binding;GO:0036094//small molecule bindin…	GO:0019538//protein metabolic process;GO:0044238//primary metabolic process;GO:0006464//cellular protein modification process;GO:0008152//metabolic process;GO:0036211//protein modification process;GO:0071704//organic substance metabolic process;GO:0044267//cellular protein metabolic process;GO:0043170//macromolecule metabolic process;GO:0044260//cellular macromolecule metabolic process;GO:0043412…
GRMZM2G135730	-	-	-	-
GRMZM2G141955	PREDICTED: protein YABBY 6 [Oryza sativa Japonica Group]	GO:0005634//nucleus	GO:0005515//protein binding	GO:0006333//chromatin assembly or disassembly;GO:0006417//regulation of translation;GO:0009737//response to abscisic acid stimulus;GO:0009793//embryo development ending in seed dormancy;GO:0009845//seed germination;GO:0009909//regulation of flower development;GO:0009933//meristem structural organization;GO:0009965//leaf morphogenesis;GO:0010022//meristem determinacy;GO:0010027//thylakoid membrane…
GRMZM2G158848	hypothetical protein ZEAMMB73_Zm00001d017367 [Zea mays]	-	-	-
GRMZM2G166186	-	-	-	-
GRMZM2G169200	PREDICTED: 8-amino-7-oxononanoate synthase isoform X1 [Brachypodium distachyon]	GO:0005829//cytosol;GO:0009536//plastid	GO:0008483//transaminase activity;GO:0008710//8-amino-7-oxononanoate synthase activity;GO:0030170//pyridoxal phosphate binding	GO:0009102//biotin biosynthetic process
GRMZM2G172586	PREDICTED: mini zinc finger protein 1-like [Zea mays]	GO:0005634//nucleus	GO:0003677//DNA binding;GO:0003700//sequence-specific DNA binding transcription factor activity;GO:0005515//protein binding	GO:0009410//response to xenobiotic stimulus;GO:0009414//response to water deprivation;GO:0009640//photomorphogenesis;GO:0009686//gibberellin biosynthetic process;GO:0009733//response to auxin stimulus;GO:0009735//response to cytokinin stimulus;GO:0009737//response to abscisic acid stimulus;GO:0009739//response to gibberellin stimulus;GO:0009740//gibberellic acid mediated signaling pathway;GO:0009…
GRMZM2G309248	hypothetical protein [Zea mays]	-	-	-
GRMZM2G312597	Subtilisin inhibitor 1 [Aegilops tauschii]	-	GO:0004867//serine-type endopeptidase inhibitor activity	GO:000961//response to wounding1
GRMZM2G347174	citrate transporter family protein [Zea mays]	GO:0031224//intrinsic component of membrane;GO:0044425//membrane part;GO:0016020//membrane	-	GO:0015698//inorganic anion transport;GO:0006820//anion transport;GO:0006811//ion transport;GO:1902578//single-organism localization;GO:0044765//single-organism transport;GO:0009987//cellular process;GO:0044699//single-organism process;GO:0044763//single-organism cellular process;GO:0006810//transport;GO:0051234//establishment of localization;GO:0051179//localization
GRMZM2G396418	male-cone protein 1-like [Aegilops tauschii subsp. tauschii] [Aegilops tauschii]	-	GO:0005488//binding	-
GRMZM2G398807	PREDICTED: 14 kDa proline-rich protein DC2.15 [Oryza sativa Japonica Group]	GO:0016023//cytoplasmic membrane-bounded vesicle	GO:0008289//lipid binding	GO:0006869//lipid transport
GRMZM2G402167	-	-	-	-
GRMZM2G407495	hypothetical protein [Zea mays]	-	-	-
GRMZM2G426004	-	-	-	-
GRMZM2G479330	uncharacterized protein LOC109751087 [Aegilops tauschii subsp. tauschii] [Aegilops tauschii]	GO:0005739//mitochondrion	GO:0003676//nucleic acid binding;GO:0008270//zinc ion binding	-
GRMZM2G505197	-	-	-	-
GRMZM2G505732	wound-induced protein 1 [Dorcoceras hygrometricum]	-	-	-
GRMZM2G515262	-	-	-	-
GRMZM2G587543	-	-	-	-
GRMZM2G700603	-	-	-	-
GRMZM2G701609	-	-	-	-
GRMZM5G812005	-	-	-	-
GRMZM5G837022	unknown [Zea mays]	-	-	-
GRMZM5G837325	hypothetical protein [Zea mays]	-	-	-
GRMZM5G839744	PREDICTED: uncharacterized protein LOC103629590 [Zea mays]	-	-	-
GRMZM5G841743	-	-	-	-
GRMZM5G861985	PREDICTED: probable pectinesterase 67 [Setaria italica]	-	-	-
GRMZM5G865115	uncharacterized protein LOC100383771 [Zea mays]	-	-	-
GRMZM5G897265	PREDICTED: probable protein S-acyltransferase 4 isoform X2 [Zea mays]	-	GO:0046872//metal ion binding	-
Putative_gene_1726	-	-	-	-
GRMZM2G505131	-	-	-	-
SD609 20 DAP
Gene ID	Description	GO Component	GO Function	GO Process
AC149475.2_FG007	Tyramine N-feruloyltransferase Os03g0151600 [Oryza sativa Japonica Group]	GO:0005737//cytoplasm;GO:0016740//transferase activity	GO:0008080//N-acetyltransferase activity;GO:0016043//cellular component organization;GO:0044238//primary metabolic process;GO:0044260//cellular macromolecule metabolic process;GO:0050794//regulation of cellular process;GO:0050896//response to stimulus	-
AC187142.3_FG007	Proline-rich receptor-like protein kinase LOC103629960 [Zea mays]	-	GO:0044237//cellular metabolic process;GO:0071840//cellular component organization or biogenesis	-
AC197699.3_FG010	transcription elongation factor 1 homolog [Aegilops tauschii subsp. tauschii] [Aegilops tauschii]	-	-	-
AC199043.2_FG002	hypothetical protein ZEAMMB73_Zm00001d009553 [Zea mays]	-	-	-
AC199875.3_FG002	-	-	-	-
AC216247.3_FG004	PREDICTED: CST complex subunit STN1-like [Elaeis guineensis]	GO:0003676//nucleic acid binding;GO:0005515//protein binding	GO:0016233//telomere capping;GO:0043687//post-translational protein modification;GO:0045893//positive regulation of transcription, DNA-dependent	-
GRMZM2G004761	Serinc-domain containing serine and sphingolipid biosynthesis protein [Zea mays]	-	-	-
GRMZM2G019280	-	-	-	-
GRMZM2G019612	EPIDERMAL PATTERNING FACTOR-like protein 4 [Aegilops tauschii subsp. tauschii] [Aegilops tauschii]	GO:0005576//extracellular region;GO:0009507//chloroplast	-	GO:0010052//guard cell differentiation;GO:2000122//negative regulation of stomatal complex development
GRMZM2G051417	hypothetical protein ZEAMMB73_Zm00001d051731 [Zea mays]	-	-	-
GRMZM2G052696	-	-	-	-
GRMZM2G053016	-	-	-	-
GRMZM2G070451	protein BUD31 homolog 2 [Asparagus officinalis]	GO:0005634//nucleus;GO:0005739//mitochondrion	-	-
GRMZM2G075943	hypothetical protein SORBIDRAFT_01g011720 [Sorghum bicolor]	GO:0005634//nucleus;GO:0005747//mitochondrial respiratory chain complex I	-	GO:0006511//ubiquitin-dependent protein catabolic process;GO:0009853//photorespiration;GO:0051788//response to misfolded protein;GO:0080129//proteasome core complex assembly
GRMZM2G080423	ATP synthase subunit epsilon, mitochondria BnaA08g01880D [Brassica napus]	GO:0000275//mitochondrial proton-transporting ATP synthase complex, catalytic core F(1);GO:0005654//nucleoplasm;GO:0005754//mitochondrial proton-transporting ATP synthase, catalytic core;GO:0031011//Ino80 complex	GO:0022892//substrate-specific transporter activity;GO:0022804//active transmembrane transporter activity;GO:0005215//transporter activity;GO:0008324//cation transmembrane transporter activity;GO:0016887//ATPase activity;GO:0022857//transmembrane transporter activity;GO:0022890//inorganic cation transmembrane transporter activity;GO:0016787//hydrolase activity;GO:0016820//hydrolase activity, acti…	GO:0019438//aromatic compound biosynthetic process;GO:0009167//purine ribonucleoside monophosphate metabolic process;GO:0072521//purine-containing compound metabolic process;GO:0009199//ribonucleoside triphosphate metabolic process;GO:0009126//purine nucleoside monophosphate metabolic process;GO:0009123//nucleoside monophosphate metabolic process;GO:0055086//nucleobase-containing small molecule m…
GRMZM2G082608	Os01g0922700 [Oryza sativa Japonica Group]	-	-	-
GRMZM2G087243	U-box domain-containing protein 3 [Ananas comosus]	GO:0043229//intracellular organelle	GO:0005515//protein binding	GO:0006464//cellular protein modification process;GO:0007165//signal transduction;GO:0009628//response to abiotic stimulus;GO:0009791//post-embryonic development;GO:0009814//defense response, incompatible interaction;GO:0033554//cellular response to stress;GO:0048731//system development;GO:0051179//localization;GO:0071310//cellular response to organic substance
GRMZM2G091558	PREDICTED: signal peptidase complex subunit 3B-like [Cucumis melo]	GO:0031224//intrinsic component of membrane;GO:0044425//membrane part;GO:0016020//membrane;GO:0005576//extracellular region;GO:0005618//cell wall;GO:0005783//endoplasmic reticulum;GO:0005787//signal peptidase complex;GO:0009506//plasmodesma;GO:0009507//chloroplast;GO:0016020//membrane;GO:0016021//integral to membrane;GO:0016023//cytoplasmic membrane-bounded vesicle	GO:0003824//catalytic activity;GO:0016787//hydrolase activity;GO:0008233//peptidase activity	GO:0019538//protein metabolic process;GO:0043170//macromolecule metabolic process;GO:0051604//protein maturation;GO:0071704//organic substance metabolic process;GO:0006508//proteolysis;GO:0010467//gene expression;GO:0008152//metabolic process;GO:0016485//protein processing;GO:0044238//primary metabolic process;GO:0006465//signal peptide processing
GRMZM2G091616	PREDICTED: uncharacterized protein LOC103640144 [Zea mays]	-	-	-
GRMZM2G093492	unknown [Zea mays]	-	-	-
GRMZM2G094723	uncharacterized protein LOC100303916 [Zea mays]	-	-	-
GRMZM2G114362	AMP deaminase [Zea mays]	GO:0005634//nucleus;GO:0005829//cytosol;GO:0016021//integral to membrane	GO:0008081//phosphoric diester hydrolase activity;GO:0016298//lipase activity;GO:0004629//phospholipase C activity;GO:0004620//phospholipase activity;GO:0042578//phosphoric ester hydrolase activity;GO:0003824//catalytic activity;GO:0016787//hydrolase activity;GO:0016788//hydrolase activity, acting on ester bonds;GO:0003876//AMP deaminase activity;GO:0046872//metal ion binding	GO:0044710//single-organism metabolic process;GO:0023052//signaling;GO:0007165//signal transduction;GO:0019693//ribose phosphate metabolic process;GO:0019637//organophosphate metabolic process;GO:0072522//purine-containing compound biosynthetic process;GO:0051716//cellular response to stimulus;GO:0006753//nucleoside phosphate metabolic process;GO:0046040//IMP metabolic process;GO:0034654//nucleob…
GRMZM2G116635	V-type proton ATPase subunit c4 [Zea mays]	GO:0016023//cytoplasmic membrane-bounded vesicle	-	GO:0006661//phosphatidylinositol biosynthetic process
GRMZM2G129092	Formin-like protein 14 Os07g0244800 [Oryza sativa Japonica Group]	GO:0016023//cytoplasmic membrane-bounded vesicle	GO:0052689//carboxylic ester hydrolase activity;GO:0003824//catalytic activity;GO:0016788//hydrolase activity, acting on ester bonds;GO:0016787//hydrolase activity;GO:0004857//enzyme inhibitor activity;GO:0030599//pectinesterase activity	GO:0019222//regulation of metabolic process;GO:0050789//regulation of biological process;GO:0048519//negative regulation of biological process;GO:0009892//negative regulation of metabolic process;GO:0065007//biological regulation;GO:0043086//negative regulation of catalytic activity
GRMZM2G143324	hypothetical protein ZEAMMB73_Zm00001d034330 [Zea mays]	-	-	-
GRMZM2G145916	-	-	-	-
GRMZM2G159935	Os01g0705400 [Oryza sativa Japonica Group]	GO:0016023//cytoplasmic membrane-bounded vesicle	-	-
GRMZM2G164929	Arginine/serine-rich protein Os07g0244800 [Oryza sativa Japonica Group]	GO:0016023//cytoplasmic membrane-bounded vesicle	GO:0016788//hydrolase activity, acting on ester bonds;GO:0016787//hydrolase activity;GO:0052689//carboxylic ester hydrolase activity;GO:0003824//catalytic activity;GO:0004857//enzyme inhibitor activity;GO:0030599//pectinesterase activity	GO:0065007//biological regulation;GO:0019222//regulation of metabolic process;GO:0009892//negative regulation of metabolic process;GO:0050789//regulation of biological process;GO:0048519//negative regulation of biological process;GO:0043086//negative regulation of catalytic activity
GRMZM2G305280	Mulatexin (Precursor) LOC100277357 precursor [Zea mays]	GO:0005576//extracellular region;GO:0005730//nucleolus;GO:0005739//mitochondrion;GO:0005829//cytosol;GO:0005886//plasma membrane;GO:0009505//plant-type cell wall;GO:0009506//plasmodesma;GO:0016023//cytoplasmic membrane-bounded vesicle;GO:0031225//anchored to membrane;GO:0032578//aleurone grain membrane	GO:0001072//RNA binding transcription antitermination factor activity;GO:0003690//double-stranded DNA binding;GO:0003697//single-stranded DNA binding;GO:0003729//mRNA binding;GO:0004568//chitinase activity;GO:0005488//binding;GO:0005507//copper ion binding;GO:0005515//protein binding;GO:0005524//ATP binding	GO:0002213//defense response to insect;GO:0006032//chitin catabolic process;GO:0006397//mRNA processing;GO:0009269//response to desiccation;GO:0009631//cold acclimation;GO:0009651//response to salt stress;GO:0009737//response to abscisic acid stimulus;GO:0009845//seed germination;GO:0009910//negative regulation of flower development;GO:0010228//vegetative to reproductive phase transition of meris…
GRMZM2G314593	Early nodulin-20 OSJNBa0035M09.6 [Oryza sativa Japonica Group]	-	-	-
GRMZM2G314927	-	-	-	-
GRMZM2G317426	-	-	-	-
GRMZM2G326933	hypothetical protein [Zea mays]	-	-	-
GRMZM2G333798	uncharacterized protein LOC100383286 [Zea mays]	-	-	-
GRMZM2G339781	Os01g0709300 [Oryza sativa Japonica Group]	GO:0016023//cytoplasmic membrane-bounded vesicle	-	-
GRMZM2G392224	Phytochrome B ZEAMMB73_Zm00001d025518 [Zea mays]	-	-	-
GRMZM2G434425	Arabinogalactan peptide 1 (Precursor) Os01g0778300 [Oryza sativa Japonica Group]	GO:0032578//aleurone grain membrane	-	-
GRMZM2G436304	-	-	-	-
GRMZM2G489579	10A19I.15 [Zea mays]	-	-	-
GRMZM2G495234	-	-	-	-
GRMZM2G507894	-	-	-	-
GRMZM2G527941	-	-	-	-
GRMZM2G536483	putative zinc finger protein [Zea mays]	-	-	-
GRMZM2G700832	-	-	-	-
GRMZM2G700842	unknown [Zea mays]	-	-	-
GRMZM2G701020	Ribosomal protein L35 [Arabidopsis thaliana]	GO:0005622//intracellular;GO:0044424//intracellular part;GO:1990904//ribonucleoprotein complex;GO:0005623//cell;GO:0044464//cell part;GO:0030529//intracellular ribonucleoprotein complex;GO:0032991//macromolecular complex;GO:0005840//ribosome;GO:0009507//chloroplast	GO:0003735//structural constituent of ribosome	GO:0010467//gene expression;GO:0008152//metabolic process;GO:0043170//macromolecule metabolic process;GO:0071704//organic substance metabolic process;GO:0006098//pentose-phosphate shunt;GO:0006412//translation
GRMZM2G702437	-	-	-	-
GRMZM5G855304	unknown [Zea mays]	-	-	-
GRMZM5G861541	unknown [Zea mays]	GO:0005634//nucleus;GO:0005739//mitochondrion	-	-
GRMZM5G867122	PREDICTED: uncharacterized protein LOC103637104 [Zea mays]	-	-	-
GRMZM2G542299	-	-	-	-
HS68 5 DAP
Gene ID	Description	GO Component	GO Function	GO Process
AC233788.2_FG003	hypothetical protein ZEAMMB73_Zm00001d012444 [Zea mays]	-	-	-
GRMZM2G004320	PREDICTED: protein-S-isoprenylcysteine O-methyltransferase A-like [Cucumis sativus]	GO:0043226//organelle;GO:0005622//intracellular;GO:0043227//membrane-bounded organelle;GO:0044464//cell part;GO:0043229//intracellular organelle;GO:0016020//membrane;GO:0044424//intracellular part;GO:0005623//cell;GO:0043231//intracellular membrane-bounded organelle;GO:0031224//intrinsic component of membrane;GO:0044425//membrane part;GO:0005789//endoplasmic reticulum membrane	GO:0004671//protein C-terminal S-isoprenylcysteine carboxyl O-methyltransferase activity	GO:0044260//cellular macromolecule metabolic process;GO:0032259//methylation;GO:0019538//protein metabolic process;GO:0044237//cellular metabolic process;GO:0036211//protein modification process;GO:0043412//macromolecule modification;GO:0071704//organic substance metabolic process;GO:0006479//protein methylation;GO:0008152//metabolic process;GO:0044238//primary metabolic process;GO:0009987//cellu…
GRMZM2G014594	hypothetical protein SORBI_002G043900 [Sorghum bicolor]	-	-	-
GRMZM2G024674	Sulfated surface glycoprotein 185 (Precursor) ZEAMMB73_Zm00001d008355 [Zea mays]	GO:0009505//plant-type cell wall;GO:0009506//plasmodesma;GO:0016020//membrane;GO:0016023//cytoplasmic membrane-bounded vesicle	GO:0005515//protein binding	GO:0030833//regulation of actin filament polymerization
GRMZM2G061439	hypothetical protein SORBI_003G237600 [Sorghum bicolor]	-	-	-
GRMZM2G098517	chitin-inducible gibberellin-responsive protein 2-like isoform X1 [Ananas comosus]	GO:0005634//nucleus;GO:0005829//cytosol;GO:0009570//chloroplast stroma;GO:0009941//chloroplast envelope	GO:0003700//sequence-specific DNA binding transcription factor activity;GO:0004048//anthranilate phosphoribosyltransferase activity;GO:0004871//signal transducer activity;GO:0005515//protein binding	GO:0010468//regulation of gene expression;GO:0019222//regulation of metabolic process;GO:0050789//regulation of biological process;GO:0060255//regulation of macromolecule metabolic process;GO:0065007//biological regulation;GO:0000162//tryptophan biosynthetic process;GO:0006355//regulation of transcription, DNA-dependent;GO:0006487//protein N-linked glycosylation;GO:0006569//tryptophan catabolic p…
GRMZM2G099542	PREDICTED: translation initiation factor eIF-2B subunit delta isoform X2 [Setaria italica]	GO:0005851//eukaryotic translation initiation factor 2B complex;GO:0016020//membrane;GO:0044424//intracellular part;GO:0071944//cell periphery	GO:0003743//translation initiation factor activity;GO:0003824//catalytic activity;GO:0005085//guanyl-nucleotide exchange factor activity;GO:0046523//S-methyl-5-thioribose-1-phosphate isomerase activity	GO:0019509//L-methionine salvage from methylthioadenosine;GO:0044238//primary metabolic process;GO:0044249//cellular biosynthetic process;GO:0044260//cellular macromolecule metabolic process;GO:0045947//negative regulation of translational initiation
GRMZM2G103617	NADH-ubiquinone reductase complex 1 MLRQ subunit [Medicago truncatula]	GO:0005777//peroxisome;GO:0016023//cytoplasmic membrane-bounded vesicle	-	GO:0010150//leaf senescence
GRMZM2G106883	Mediator of RNA polymerase II transcription subunit 31 [Ananas comosus]	GO:0043234//protein complex;GO:0032991//macromolecular complex	GO:0001104//RNA polymerase II transcription cofactor activity	GO:0051252//regulation of RNA metabolic process;GO:0050794//regulation of cellular process;GO:0031323//regulation of cellular metabolic process;GO:2000112//regulation of cellular macromolecule biosynthetic process;GO:0060255//regulation of macromolecule metabolic process;GO:0050789//regulation of biological process;GO:0051171//regulation of nitrogen compound metabolic process;GO:0065007//biologic…
GRMZM2G111304	Os06g0687000 [Oryza sativa Japonica Group]	-	-	-
GRMZM2G125679	PREDICTED: probable calcium-binding protein CML30 [Brachypodium distachyon]	GO:0005634//nucleus;GO:0005777//peroxisome	GO:0005509//calcium ion binding;GO:0005515//protein binding;GO:0046872//metal ion binding	GO:0009409//response to cold;GO:0009567//double fertilization forming a zygote and endosperm;GO:0009827//plant-type cell wall modification;GO:0009860//pollen tube growth;GO:0010091//trichome branching
GRMZM2G133838	-	-	-	-
GRMZM2G152860	Formin-like protein 5 Os10g0182800 [Oryza sativa Japonica Group]	GO:0031224//intrinsic to membrane;GO:0043231//intracellular membrane-bounded organelle;GO:0044444//cytoplasmic part;GO:0044446//intracellular organelle part	-	GO:0009987//cellular process
GRMZM2G170167	PREDICTED: uncharacterized protein LOC103635545 [Zea mays]	GO:0009536//plastid	-	-
GRMZM2G336017	-	-	-	-
GRMZM2G377787	PREDICTED: subtilisin-like protease SBT3.18 isoform X3 [Oryza sativa Japonica Group]	GO:0005618//cell wall;GO:0005777//peroxisome;GO:0009505//plant-type cell wall;GO:0009897//external side of plasma membrane;GO:0031012//extracellular matrix;GO:0042127//regulation of cell proliferation;GO:0048046//apoplast	GO:0004252//serine-type endopeptidase activity;GO:0042802//identical protein binding	GO:0019538//protein metabolic process;GO:0071704//organic substance metabolic process;GO:0043170//macromolecule metabolic process;GO:0008152//metabolic process;GO:0044238//primary metabolic process;GO:0006508//proteolysis;GO:0009567//double fertilization forming a zygote and endosperm;GO:0010103//stomatal complex morphogenesis;GO:0043086//negative regulation of catalytic activity;GO:0048359//muci…
GRMZM2G405592	hypothetical protein ZEAMMB73_Zm00001d035187 [Zea mays]	-	-	-
GRMZM2G444378	PREDICTED: long chain base biosynthesis protein 1c [Oryza brachyantha]	GO:0005789//endoplasmic reticulum membrane;GO:0016021//integral to membrane;GO:0016023//cytoplasmic membrane-bounded vesicle	GO:0005488//binding;GO:0003824//catalytic activity;GO:0043167//ion binding;GO:0043168//anion binding;GO:0004758//serine C-palmitoyltransferase activity;GO:0005515//protein binding;GO:0030170//yridoxal phosphate binding	GO:0008152//metabolic process;GO:0016049//cell growth;GO:0030148//sphingolipid biosynthetic process;GO:0043067//regulation of programmed cell death;
GRMZM2G446891	hypothetical protein ZEAMMB73_Zm00001d040374 [Zea mays]	-	-	-
GRMZM2G449327	PREDICTED: uncharacterized protein LOC103627807 isoform X2 [Zea mays]	-	-	-
GRMZM2G462808	PREDICTED: cysteine protease ATG4A isoform X1 [Oryza sativa Japonica Group]	GO:0044422//organelle part;GO:0043231//intracellular membrane-bounded organelle;GO:0044444//cytoplasmic part;GO:0044437//vacuolar part;GO:0043226//organelle;GO:0005623//cell;GO:0044464//cell part;GO:0005622//intracellular;GO:0044446//intracellular organelle part;GO:0044424//intracellular part;GO:0005773//vacuole;GO:0043227//membrane-bounded organelle;GO:0005737//cytoplasm;GO:0043229//intracellula…	GO:0016798//hydrolase activity, acting on glycosyl bonds;GO:0070011//peptidase activity, acting on L-amino acid peptides;GO:0016787//hydrolase activity;GO:0019783//ubiquitin-like protein-specific protease activity;GO:0004180//carboxypeptidase activity;GO:0003824//catalytic activity;GO:0005488//binding;GO:0008238//exopeptidase activity;GO:0008234//cysteine-type peptidase activity;GO:0008233//pepti…	GO:0009987//cellular process;GO:0019538//protein metabolic process;GO:0051179//localization;GO:0044238//primary metabolic process;GO:0044237//cellular metabolic process;GO:0071704//organic substance metabolic process;GO:0033036//macromolecule localization;GO:0051234//establishment of localization;GO:0043170//macromolecule metabolic process;GO:0044248//cellular catabolic process;GO:0008152//metabo…
GRMZM2G486618	-	-	-	-
GRMZM2G509699	PREDICTED: histone-lysine N-methyltransferase SUVR3 [Brachypodium distachyon]	-	-	-
GRMZM2G512258	-	-	-	-
GRMZM2G514443	-	-	-	-
GRMZM2G565441	hypothetical protein GRMZM2G565441.1 [Zea mays subsp. mays] [Zea mays]	-	-	-
GRMZM2G568478	hypothetical protein [Zea mays]	GO:0005576//extracellular region;GO:0005886//plasma membrane;GO:0016023//cytoplasmic membrane-bounded vesicle	-	-
GRMZM2G575445	-	-	-	-
GRMZM2G700337	-	-	-	-
GRMZM2G700945	PREDICTED: coiled-coil domain-containing protein 130-like [Phoenix dactylifera]	-	-	-
GRMZM5G821709	PREDICTED: uncharacterized protein LOC103638598 [Zea mays]	GO:0009536//plastid	-	-
GRMZM5G839920	PREDICTED: protein disulfide isomerase-like 2-1, partial [Zea mays]	-	-	-
GRMZM5G842214	sugary enhancer1 [Zea mays]	-	-	-
GRMZM5G856180	PREDICTED: cytochrome c [Theobroma cacao]	GO:0044425//membrane part;GO:0016020//membrane;GO:0043229//intracellular organelle;GO:0043226//organelle;GO:0043227//membrane-bounded organelle;GO:0043231//intracellular membrane-bounded organelle;GO:0005623//cell;GO:0044464//cell part;GO:0005622//intracellular;GO:0044424//intracellular part;GO:0070469//respiratory chain	GO:0046906//tetrapyrrole binding;GO:0043167//ion binding;GO:0005488//binding;GO:0097159//organic cyclic compound binding;GO:1901363//heterocyclic compound binding;GO:0043169//cation binding;GO:0009055//electron carrier activity	GO:0008152//metabolic process;GO:0044699//single-organism process;GO:0044710//single-organism metabolic process;GO:0006007//glucose catabolic process;GO:0008283//cell proliferation;GO:0022900//electron transport chain
GRMZM5G867888	unknown [Zea mays]	-	-	-
GRMZM5G880803	AP2 domain transcription factor [Zea mays]	GO:0005634//nucleus	GO:0003677//DNA binding;GO:0003700//sequence-specific DNA binding transcription factor activity;GO:0016787//hydrolase activity	GO:0006355//regulation of transcription, DNA-dependent;GO:0048731//system development;GO:0050896//response to stimulus
GRMZM5G889218	PREDICTED: atherin-like [Zea mays]	-	GO:0005507//copper ion binding	-
GRMZM5G889240	hypothetical protein [Zea mays]	-	-	-
GRMZM2G521038	-	-	-	-
Putative_gene_3526	-	-	-	-
GRMZM2G512200	-	-	-	-
GRMZM2G522580	-	-	-	-
GRMZM2G506239	-	-	-	-
HS68 10 DAP
Gene ID	Description	GO Component	GO Function	GO Process
AC197427.3_FG003	PREDICTED: atherin-like [Zea mays]	-	-	-
AC207793.3_FG002	hypothetical protein ZEAMMB73_Zm00001d041152 [Zea mays]	-	-	-
GRMZM2G047021	unknown [Zea mays]	-	-	-
GRMZM2G070462	-	-	-	-
GRMZM2G079836	farnesyl pyrophosphate synthase A2 [Triticum aestivum]	GO:0005737//cytoplasm;GO:0005829//cytosol	GO:0003824//catalytic activity;GO:0004161//dimethylallyltranstransferase activity;GO:0004337//geranyltranstransferase activity;GO:0046872//metal ion binding	GO:0006084//acetyl-CoA metabolic process;(GO:0006695//cholesterol biosynthetic process;GO:0016132//brassinosteroid biosynthetic process;GO:0033384//geranyl diphosphate biosynthetic process;GO:0045337//farnesyl diphosphate biosynthetic process
GRMZM2G085568	PREDICTED: protein FYV8-like isoform X1 [Phoenix dactylifera]	GO:0005739//mitochondrion	-	-
GRMZM2G087484	PREDICTED: C2 and GRAM domain-containing protein At5g50170 isoform X2 [Citrus sinensis]	-	-	-
GRMZM2G108348	PREDICTED: 40S ribosomal protein S9-2-like [Brachypodium distachyon]	GO:0005623//cell;GO:0044422//organelle part;GO:1990904//ribonucleoprotein complex;GO:0044464//cell part;GO:0044446//intracellular organelle part;GO:0044391//ribosomal subunit;GO:0005622//intracellular;GO:0043229//intracellular organelle;GO:0005840//ribosome;GO:0044444//cytoplasmic part;GO:0043232//intracellular non-membrane-bounded organelle;GO:0044424//intracellular part;GO:0043226//organelle;GO…	GO:0005488//binding;GO:0097159//organic cyclic compound binding;GO:0005198//structural molecule activity;GO:0003723//RNA binding;GO:0003676//nucleic acid binding;GO:1901363//heterocyclic compound binding	GO:0008152//metabolic process;GO:0071704//organic substance metabolic process;GO:0043170//macromolecule metabolic process;GO:0010467//gene expression
GRMZM2G108819	hypothetical protein ZEAMMB73_Zm00001d034330 [Zea mays]	GO:0005886//plasma membrane	-	-
GRMZM2G120816	PREDICTED: probable E3 ubiquitin-protein ligase HIP1 isoform X3 [Oryza sativa Japonica Group]	GO:0043231//intracellular membrane-bounded organelle	GO:0005488//binding;GO:0043169//cation binding;GO:0043167//ion binding;GO:0004842//ubiquitin-protein ligase activity;GO:0008270//zinc ion binding;GO:0031624//ubiquitin conjugating enzyme binding	GO:0046621//negative regulation of organ growth;GO:0048437//floral organ development;GO:0050896//response to stimulus;GO:0051865//protein autoubiquitination
GRMZM2G122214	hypothetical protein ZEAMMB73_Zm00001d035870 [Zea mays]	-	-	-
GRMZM2G133941	Vegetative cell wall protein gp1 (Precursor) OSIGBa0113I13.5 [Oryza sativa Indica Group]	GO:0016020//membrane;GO:0043231//intracellular membrane-bounded organelle	-	GO:0044238//primary metabolic process;GO:0044260//cellular macromolecule metabolic process
GRMZM2G139256	-	-	-	-
GRMZM2G144387	ribosomal protein [Zea mays]	GO:0044422//organelle part;GO:0005840//ribosome;GO:0005737//cytoplasm;GO:1990904//ribonucleoprotein complex;GO:0005623//cell;GO:0044424//intracellular part;GO:0044444//cytoplasmic part;GO:0043226//organelle;GO:0043228//non-membrane-bounded organelle;GO:0044464//cell part;GO:0030529//intracellular ribonucleoprotein complex;GO:0032991//macromolecular complex;GO:0044446//intracellular organelle part…	GO:0005198//structural molecule activity	GO:0043170//macromolecule metabolic process;GO:0008152//metabolic process;GO:0010467//gene expression;GO:0071704//organic substance metabolic process
GRMZM2G147322	PREDICTED: glutamate 5-kinase [Oryza sativa Japonica Group]	-	GO:0016740//transferase activity	GO:0008652//cellular amino acid biosynthetic process
GRMZM2G157389	DEAD-box ATP-dependent RNA helicase 56 BnaA02g00870D [Brassica napus]	-	-	-
GRMZM2G320708	Late embryogenesis abundant (LEA) hydroxyproline-rich glycoprotein family [Zea mays]	GO:0016020//membrane;GO:0043231//intracellular membrane-bounded organelle;GO:0044444//cytoplasmic part;GO:0071944//cell periphery	GO:0005488//binding;GO:0016301//kinase activity	GO:0003006//developmental process involved in reproduction;GO:0009269//response to desiccation;GO:0009664//plant-type cell wall organization;GO:0009826//unidimensional cell growth;GO:0032501//multicellular organismal process;GO:0044238//primary metabolic process;GO:0044260//cellular macromolecule metabolic process;GO:0051704//multi-organism process
GRMZM2G375607	hypothetical protein ZEAMMB73_Zm00001d014365, partial [Zea mays]	-	-	-
GRMZM2G377694	H0913C04.5 [Oryza sativa Indica Group]	-	-	-
GRMZM2G378881	PREDICTED: cyclin-A1-2 [Setaria italica]	-	-	-
GRMZM2G381318	unknown [Zea mays]	-	-	-
GRMZM2G382618	hypothetical protein ZEAMMB73_Zm00001d036953 [Zea mays]	-	-	-
GRMZM2G399396	-	-	-	-
GRMZM2G406378	-	-	-	-
GRMZM2G417004	unknown [Zea mays]	-	-	-
GRMZM2G461777	-	-	-	-
GRMZM2G487197	-	-	-	-
GRMZM2G498079	-	-	-	-
GRMZM2G521967	E3 ubiquitin-protein ligase TRIP12-like [Aegilops tauschii subsp. tauschii] [Aegilops tauschii]	-	-	-
GRMZM2G572807	hypothetical protein ZEAMMB73_Zm00001d040561 [Zea mays]	-	-	-
GRMZM2G590450	-	-	-	-
GRMZM2G702019	-	-	-	-
GRMZM2G702279	-	-	-	-
GRMZM2G703059	-	-	-	-
GRMZM2G704239	-	-	-	-
GRMZM5G806695	PREDICTED: vegetative cell wall protein gp1-like [Zea mays]	-	-	-
GRMZM5G813606	-	-	-	-
GRMZM5G834208	mitochondrial ATP synthase 6 KD subunit [Oryza sativa Japonica Group]	-	-	-
GRMZM5G845419	-	-	-	-
GRMZM5G862016	hypothetical protein PhapfoPp032 [Phalaenopsis aphrodite subsp. formosana] [Phalaenopsis aphrodite]	GO:0009507//chloroplast	-	-
GRMZM5G877547	Eukaryotic aspartyl protease family protein [Oryza sativa Japonica Group]	GO:0006508//proteolysis	-	-
GRMZM5G885287	hypothetical protein [Zea mays]	-	-	-
GRMZM5G894109	-	-	-	-
Putative_gene_487	-	-	-	-
HS68 15 DAP
Gene ID	Description	GO Component	GO Function	GO Process
AC196130.3_FG002	PREDICTED: uncharacterized protein LOC103650850 [Zea mays]	GO:0005618//cell wall;GO:0005886//plasma membrane;GO:0009505//plant-type cell wall;GO:0009506//plasmodesma	-	GO:0009888//tissue development;GO:0010015//root morphogenesis
AC196212.3_FG001	hypothetical protein [Zea mays]	-	-	-
AC202172.3_FG004	PREDICTED: defensin Ec-AMP-D1-like [Prunus mume]	-	-	-
GRMZM2G000679	uncharacterized protein LOC103650254 precursor [Zea mays]	-	-	-
GRMZM2G013855	Lecithin retinol acyltransferase [Anthurium amnicola]	-	-	-
GRMZM2G024697	F-box/kelch-repeat protein SKIP11 [Zea mays]	-	-	-
GRMZM2G028547	PREDICTED: 50S ribosomal protein L20-like [Oryza brachyantha]	GO:0005739//mitochondrion;GO:0005840//ribosome;GO:0009507//chloroplast;GO:0009536//plastid;GO:0030529//ribonucleoprotein complex	GO:0003723//RNA binding;GO:0003735//structural constituent of ribosome;GO:0019843//rRNA binding	GO:0006412//translation
GRMZM2G033379	H0701F11.6 [Oryza sativa Indica Group]	GO:0005739//mitochondrion;GO:0016020//membrane	-	-
GRMZM2G038811	hypothetical protein [Zea mays]	-	-	-
GRMZM2G040811	PREDICTED: protein trichome birefringence-like 33 [Zea mays]	GO:0009536//plastid;GO:0071944//cell periphery	GO:0003824//catalytic activity	GO:0009987//cellular process
GRMZM2G048120	aspartic proteinase nepenthesin-1-like [Ananas comosus]	GO:0005783//endoplasmic reticulum	GO:0070001//aspartic-type peptidase activity	GO:0008152//metabolic process;GO:0009414//response to water deprivation;GO:0009737//response to abscisic acid stimulus
GRMZM2G050410	hypothetical protein ZEAMMB73_Zm00001d045489 [Zea mays]	-	-	-
GRMZM2G051879	histone H3 protein [Betula luminifera]	GO:0005622//intracellular;GO:0044464//cell part;GO:0005623//cell;GO:0044424//intracellular part;GO:0043226//organelle;GO:0043231//intracellular membrane-bounded organelle;GO:0043227//membrane-bounded organelle;GO:0043229//intracellular organelle;GO:0032991//macromolecular complex;GO:0030529//intracellular ribonucleoprotein complex;GO:0043228//non-membrane-bounded organelle;GO:1990904//ribonucleop…	GO:0005515//protein binding;GO:1901363//heterocyclic compound binding;GO:0097159//organic cyclic compound binding;GO:0005488//binding;GO:0003676//nucleic acid binding;GO:0046983//protein dimerization activity	GO:0043933//macromolecular complex subunit organization;GO:0044723//single-organism carbohydrate metabolic process;GO:0019318//hexose metabolic process;GO:0051641//cellular localization;GO:0009987//cellular process;GO:0051276//chromosome organization;GO:0051649//establishment of localization in cell;GO:0034613//cellular protein localization;GO:0044238//primary metabolic process;GO:0071824//protei…
GRMZM2G055499	PREDICTED: mitogen-activated protein kinase 2 [Oryza brachyantha]	GO:0005634//nucleus;GO:0005737//cytoplasm;GO:0005802//trans-Golgi network;GO:0005829//cytosol;GO:0009524//phragmoplast;GO:0009574//preprophase band	GO:0004707//MAP kinase activity;GO:0004713//protein tyrosine kinase activity;GO:0005515//protein binding;GO:0005524//ATP binding	GO:0000165//MAPK;cascade;GO:0000169//activation of MAPK activity involved in osmosensory signaling pathway;GO:0000303//response to superoxide;GO:0000746//conjugation;GO:0001666//response to hypoxia;GO:0006355//regulation of transcription, DNA-dependent;GO:0006468//protein phosphorylation;GO:0006612//protein targeting to membrane;GO:0006972//hyperosmotic response;GO:0007067//mitosis;GO:0009409//re…
GRMZM2G056186	flowering locus T, partial [Euphorbia esula]	GO:0005634//nucleus;GO:0005773//vacuole;GO:0005886//plasma membrane;GO:0031982//vesicle	GO:0003700//sequence-specific DNA binding transcription factor activity;GO:0003712//transcription cofactor activity;GO:0008429//phosphatidylethanolamine binding	GO:0000041//transition metal ion transport;GO:0006623//protein targeting to vacuole;GO:0009737//response to abscisic acid stimulus;GO:0009744//response to sucrose stimulus;GO:0009791//post-embryonic development;GO:0009910//negative regulation of flower development;GO:0009911//positive regulation of flower development;GO:0010030//positive regulation of seed germination;GO:0010229//inflorescence de…
GRMZM2G056252	omega-6 fatty acid desaturase 2 endoplasmic reticulum isozyme 2c [Musa AB Group]	GO:0005634//nucleus;GO:0005789//endoplasmic reticulum membrane;GO:0009941//chloroplast envelope;GO:0016020//membrane;GO:0016021//integral to membrane;GO:0042170//plastid membrane	GO:0016491//oxidoreductase activity;GO:0003824//catalytic activity;GO:0016705//oxidoreductase activity, acting on paired donors, with incorporation or reduction of molecular oxygen;GO:0016717//oxidoreductase activity, acting on paired donors, with oxidation of a pair of donors resulting in the reduction of molecular oxygen to two molecules of water;GO:0016720//delta12-fatty acid dehydrogenase act…	GO:0044699//single-organism process;GO:0008152//metabolic process;GO:0044710//single-organism metabolic; GO:0006629//lipid metabolic process;GO:0006636//unsaturated fatty acid biosynthetic process;GO:0009409//response to cold;GO:0051186//cofactor metabolic process;GO:0055114//oxidation-reduction process;GO:0080167//response to karrikin
GRMZM2G067989	PREDICTED: chaperone protein DnaJ-like [Brachypodium distachyon]	-	GO:0005488//binding;GO:0043167//ion binding;GO:0051082//unfolded protein binding	GO:0044238//primary metabolic process
GRMZM2G070931	-	-	-	-
GRMZM2G071010	PREDICTED: ubiquitin-conjugating enzyme E2 variant 1D isoform X2 [Raphanus sativus]	GO:0005634//nucleus;GO:0005829//cytosol;GO:0031372//UBC13-MMS2 complex	GO:0004842//ubiquitin-protein ligase activity;GO:0005515//protein binding	GO:0000278//mitotic cell cycle;GO:0006007//glucose catabolic process;GO:0006301//postreplication repair;GO:0006396//RNA processing;GO:0006511//ubiquitin-dependent protein catabolic process;GO:0006623//protein targeting to vacuole;GO:0007031//peroxisome organization;GO:0016192//vesicle-mediated transport;GO:0016567//protein ubiquitination;GO:0044255//cellular lipid metabolic process;GO:0048573//ph…
GRMZM2G092689	Mitochondrial uncoupling protein 2 [Zea mays]	GO:0043226//organelle;GO:0031090//organelle membrane;GO:0031224//intrinsic component of membrane;GO:0016020//membrane;GO:0044422//organelle part;GO:0044425//membrane part;GO:0043227//membrane-bounded organelle	GO:0017077//oxidative phosphorylation uncoupler activity	GO:0046907//intracellular transport;GO:1902578//single-organism localization;GO:0051649//establishment of localization in cell;GO:1902582//single-organism intracellular transport;GO:0044699//single-organism process;GO:0044765//single-organism transport;GO:0051234//establishment of localization;GO:0051641//cellular localization;GO:0006810//transport;GO:0051179//localization
GRMZM2G095363	General transcription factor 2-related zinc finger protein [Zea mays]	-	-	-
GRMZM2G097719	hypothetical protein ZEAMMB73_Zm00001d019324 [Zea mays]	-	-	GO:0006952//defense response
GRMZM2G100662	PREDICTED: protein SPIRAL1-like 1 [Brassica oleracea var. oleracea] [Brassica oleracea]	GO:0055028//cortical microtubule	-	GO:0009628//response to abiotic stimulus;GO:0009826//unidimensional cell growth
GRMZM2G105772	Probable ubiquitin receptor RAD23 osRAD23 [Oryza sativa Japonica Group]	GO:0005623//cell;GO:0043231//intracellular membrane-bounded organelle;GO:0044424//intracellular part;GO:0043227//membrane-bounded organelle;GO:0043229//intracellular organelle;GO:0044464//cell part;GO:0043226//organelle;GO:0005622//intracellular	GO:0003684//damaged DNA binding;GO:0005515//protein binding	GO:0019941//modification-dependent protein catabolic process;GO:0030163//protein catabolic process;GO:0006974//cellular response to DNA damage stimulus;GO:0043632//modification-dependent macromolecule catabolic process;GO:0006725//cellular aromatic compound metabolic process;GO:0033554//cellular response to stress;GO:0050896//response to stimulus;GO:0006259//DNA metabolic process;GO:0006508//prot…
GRMZM2G114778	PREDICTED: phospholipase D beta 1-like [Brachypodium distachyon]	-	-	-
GRMZM2G147894	TPR domain containing protein [Zea mays]	GO:0005634//nucleus;GO:0005739//mitochondrion;GO:0044446//intracellular organelle part	GO:0003824//catalytic activity;GO:0005488//binding	GO:0043170//macromolecule metabolic process;GO:0050789//regulation of biological process
GRMZM2G156376	PREDICTED: uncharacterized protein LOC103638202 [Zea mays]	-	-	-
GRMZM2G164672	PREDICTED: mannose-1-phosphate guanylyltransferase 1-like [Gossypium arboreum]	GO:0005634//nucleus;GO:0005739//mitochondrion;GO:0005829//cytosol	GO:0016772//transferase activity, transferring phosphorus-containing groups;GO:0016740//transferase activity;GO:0003824//catalytic activity;GO:0004475//mannose-1-phosphate guanylyltransferase activity;GO:0005515//protein binding;GO:0005525//GTP binding;GO:0008928//mannose-1-phosphate guanylyltransferase (GDP) activity	GO:0006007//glucose catabolic process;GO:0006094//gluconeogenesis;GO:0007010//cytoskeleton organization;GO:0009298//GDP-mannose biosynthetic process;GO:0009408//response to heat;GO:0009651//response to salt stress;GO:0009753//response to jasmonic acid stimulus;GO:0010193//response to ozone;GO:0010498//proteasomal protein catabolic process;GO:0019853//L-ascorbic acid biosynthetic process;GO:003024…
GRMZM2G335601	PREDICTED: protein SIEL isoform X5 [Setaria italica]	GO:0005768//endosome	-	GO:0010496//intercellular transport;GO:0090057//root radial pattern formation
GRMZM2G348563	-	-	-	-
GRMZM2G366910	-	-	-	-
GRMZM2G376595	PREDICTED: phospholipid--sterol O-acyltransferase isoform X1 [Phoenix dactylifera]	GO:0016023//cytoplasmic membrane-bounded vesicle;GO:0043231//intracellular membrane-bounded organelle	GO:0004607//phosphatidylcholine-sterol O-acyltransferase activity;GO:0080095//phosphatidylethanolamine-sterol O-acyltransferase activity;GO:0080096//phosphatidate-sterol O-acyltransferase activity	GO:0010150//leaf senescence;GO:0016127//sterol catabolic process;GO:0034434//sterol esterification
GRMZM2G386987	hypothetical protein ZEAMMB73_Zm00001d008194 [Zea mays]	-	-	-
GRMZM2G444748	Ocs element-binding factor 1 [Morus notabilis]	GO:0009536//plastid;GO:0016020//membrane;GO:0043231//intracellular membrane-bounded organelle;GO:0071944//cell periphery	GO:0005488//binding;GO:0097159//organic cyclic compound binding;GO:1901363//heterocyclic compound binding;GO:0003677//DNA binding;GO:0003676//nucleic acid binding;GO:0016301//kinase activity;GO:0016787//hydrolase activity	GO:0019222//regulation of metabolic process;GO:0010468//regulation of gene expression;GO:0065007//biological regulation;GO:0050789//regulation of biological process;GO:0060255//regulation of macromolecule metabolic process;GO:0006355//regulation of transcription, DNA-dependent;GO:0006807//nitrogen compound metabolic process;GO:0006952//defense response;GO:0009056//catabolic process;GO:0016043//ce…
GRMZM2G458249	PREDICTED: zinc finger MYM-type protein 1-like [Malus domestica]	-	GO:0005515//protein binding;GO:0005488//binding;GO:0046983//protein dimerization activity	-
GRMZM2G483598	Ubiquitin carboxyl-terminal hydrolase 25 [Zea mays]	-	-	-
GRMZM2G512469	hypothetical protein [Zea mays]	-	-	-
GRMZM2G701013	hypothetical protein ZEAMMB73_Zm00001d045773 [Zea mays]	-	-	-
GRMZM2G702070	-	-	-	-
GRMZM2G702844	-	-	-	-
GRMZM5G816386	-	-	-	-
GRMZM5G838140	-	-	-	-
GRMZM5G866067	-	-	-	-
GRMZM5G868296	unknown [Zea mays]	-	-	-
GRMZM5G878582	unknown [Zea mays]	-	-	-
GRMZM5G881846	-	-	-	-
GRMZM5G890438	unknown [Zea mays]	-	-	-
GRMZM5G892921	-	-	-	-
GRMZM2G558772	-	-	-	-
Putative_gene_318	-	-	-	-
GRMZM2G526142	-	-	-	-
GRMZM2G500076	-	-	-	-
GRMZM2G511730	-	-	-	-
GRMZM2G513374	-	-	-	-
GRMZM2G545483	-	-	-	-
GRMZM2G497523	-	-	-	-
GRMZM2G561188	-	-	-	-
HS68 20 DAP
Gene ID	Description	GO Component	GO Function	GO Process
AC201898.4_FG004	hypothetical protein ZEAMMB73_Zm00001d033106 [Zea mays]	GO:0016023//cytoplasmic membrane-bounded vesicle	-	-
GRMZM2G012807	PREDICTED: uncharacterized protein LOC103635508 [Zea mays]	-	-	-
GRMZM2G022730	-	-	GO:0000166//nucleotide binding;GO:0004812//aminoacyl-tRNA ligase activity;GO:0004815//aspartate-tRNA ligase activity;GO:0005524//ATP binding;GO:0005737//cytoplasm;GO:0006418//tRNA aminoacylation for protein translation;GO:0006422//aspartyl-tRNA aminoacylation	-
GRMZM2G027241	HVA22-like protein i [Ananas comosus]	GO:0044425//membrane part;GO:0031224//intrinsic component of membrane;GO:0016020//membrane	-	-
GRMZM2G029798	Formin-like protein 5 Os06g0126400 [Oryza sativa Japonica Group]	GO:0016020//membrane;GO:0043229//intracellular organelle;GO:0044444//cytoplasmic part;	-	-
GRMZM2G033007	cytochrome c oxidase subunit 5C-like [Ananas comosus]	GO:0005751//mitochondrial respiratory chain complex IV;GO:0016021//integral to membrane	GO:0005746//mitochondrial respiratory chain	GO:0006123//mitochondrial electron transport, cytochrome c to oxygen
GRMZM2G055151	-	-	-	-
GRMZM2G073842	-	-	-	-
GRMZM2G108847	Proteinase inhibitor PSI-1.2 At1g72060 [Arabidopsis thaliana]	GO:0016023//cytoplasmic membrane-bounded vesicle	GO:0004867//serine-type endopeptidase inhibitor activity	GO:0006979:response to oxidative stress;GO:0044092//negative regulation of molecular function;GO:0019222//regulation of metabolic process;GO:0050789//regulation of biological process;GO:0051346//negative regulation of hydrolase activity;GO:0031323//regulation of cellular metabolic process;GO:0065007//biological regulation;GO:0010605//negative regulation of macromolecule metabolic process;GO:00525…
GRMZM2G123765	-	-	-	-
GRMZM2G132000	GRF zinc finger family protein [Oryza sativa Japonica Group]	GO:0005737//Cellular Component: cytoplasm	GO:0005515//Interacting selectively and non-covalently with any protein or protein complex (a complex of two or more proteins that may include other nonprotein molecules). [GOC:go_curators]	-
GRMZM2G146623	Dihydroflavonol-4-reductase Os07g0601900 [Oryza sativa Japonica Group]	GO:0005783//endoplasmic reticulum	GO:0005515//protein binding;GO:0003824//catalytic activity;GO:0003723//RNA binding;GO:0048037//cofactor;binding;GO:0005488//binding	GO:0000398//mRNA splicing, via spliceosome;GO:0006970//response to osmotic stress
GRMZM2G150706	BnaA08g00330D [Brassica napus]	GO:0016023//cytoplasmic membrane-bounded vesicle	-	-
GRMZM2G151671	PREDICTED: uncharacterized protein LOC103649966 [Zea mays]	GO:0016023//cytoplasmic membrane-bounded vesicle	-	-
GRMZM2G154029	PREDICTED: transcription factor bHLH144-like isoform X1 [Musa acuminata subsp. malaccensis] [Musa acuminata]	GO:0005634//nucleus;GO:0005739//mitochondrion	GO:0003677//DNA binding;GO:0003700//sequence-specific DNA binding transcription factor activity;GO:0046983//protein dimerization activity	GO:0006355//regulation of transcription, DNA-dependent;GO:0009733//response to auxin stimulus; GO:0010500//transmitting tissue development;GO:0016049//cell growth;GO:0048462//carpel formation;GO:0048766//root hair initiation;GO:0080126//ovary septum development;GO:0080147//root hair cell development
GRMZM2G155873	-	-	-	-
GRMZM2G157517	hypothetical protein SORBI_K033500 [Sorghum bicolor]	-	-	-
GRMZM2G180799	-	-	-	-
GRMZM2G325139	OSJNBa0086B14.19 [Oryza sativa Japonica Group]	-	-	-
GRMZM2G348301	Os07g0243150, partial [Oryza sativa Japonica Group]	GO:0044464//cell part;GO:0005623//cell;GO:0043226//organelle;GO:0044422//organelle part;GO:0009507//chloroplast;GO:0044434//chloroplast part;GO:0043229//intracellular organelle;GO:0009536//plastid;GO:0005737//cytoplasm;GO:0043231//intracellular membrane-bounded organelle;GO:0043227//membrane-bounded organelle;GO:0044446//intracellular organelle part;GO:0044435//plastid part;GO:0044444//cytoplasmi…	-	GO:0050896//response to stimulus;GO:0009628//response to abiotic stimulus;GO:0009416//response to light stimulus;GO:0009314//response to radiation;GO:0009987//cellular process;GO:0044699//single-organism process
GRMZM2G449033	Steroid 5-alpha-reductase DET2 [Ananas comosus]	GO:0044425//membrane part;GO:0044424//intracellular part;GO:0044464//cell part;GO:0016020//membrane;GO:0031224//intrinsic component of membrane;GO:0005622//intracellular;GO:0005623//cell	GO:0003824//catalytic activity;GO:0035671//enone reductase activity;GO:0016627//oxidoreductase activity, acting on the CH-CH group of donors;GO:0016491//oxidoreductase activity;GO:0016628//oxidoreductase activity, acting on the CH-CH group of donors, NAD or NADP as acceptor	GO:0008152//metabolic process;GO:0016129//phytosteroid biosynthetic process;GO:1901615//organic hydroxy compound metabolic process;GO:0044238//primary metabolic process;GO:0071704//organic substance metabolic process;GO:0044710//single-organism metabolic process;GO:1901362//organic cyclic compound biosynthetic process;GO:0006066//alcohol metabolic process;GO:0008610//lipid biosynthetic process;GO…
GRMZM2G456746	EGG APPARATUS-1 protein [Zea mays]	GO:0005739//mitochondrion;GO:0016021//integral to membrane;GO:0016023//cytoplasmic membrane-bounded vesicle	-	GO:0007338//single fertilization
GRMZM2G535409	hypothetical protein [Zea mays]	GO:0044464//cell part	-	-
GRMZM2G540491	FRIGIDA-like protein 3 [Aegilops tauschii subsp. tauschii] [Aegilops tauschii]	-	-	-
GRMZM2G558768	-	-	-	-
GRMZM2G703265	Endoglucanase 22 [Aegilops tauschii]	GO:0005739//mitochondrion;GO:0016023//cytoplasmic membrane-bounded vesicle	GO:0004553//hydrolase activity, hydrolyzing O-glycosyl compounds;GO:0016798//hydrolase activity, acting on glycosyl bonds	GO:0005975//carbohydrate metabolic process;GO:0008152//metabolic process;GO:0009987//cellular process
GRMZM5G802232	unknown [Zea mays]	-	-	-
GRMZM5G802395	unknown [Zea mays]	-	-	-
GRMZM5G815553	photosystem I subunit VII, partial (plastid) [Cyperus alternifolius]	GO:0044444//cytoplasmic part;GO:0009507//chloroplast;GO:0044424//intracellular part;GO:0005622//intracellular;GO:0044434//chloroplast part;GO:0044422//organelle part;GO:0044436//thylakoid part;GO:0043229//intracellular organelle;GO:0005623//cell;GO:0005737//cytoplasm;GO:0044464//cell part;GO:0044435//plastid part;GO:0009521//photosystem;GO:0034357//photosynthetic membrane;GO:0009536//plastid;GO:0…	GO:0051536//iron-sulfur cluster binding;GO:0043169//cation binding;GO:0051540//metal cluster binding;GO:0003824//catalytic activity;GO:0005488//binding;GO:0043167//ion binding	GO:0055114//oxidation-reduction process;GO:0015979//photosynthesis;GO:0008152//metabolic process;GO:0019684//photosynthesis, light reaction;GO:0044710//single-organism metabolic process;GO:0009987//cellular process;GO:0009767//photosynthetic electron transport chain;GO:0044699//single-organism process;GO:0006091//generation of precursor metabolites and energy;GO:0022900//electron transport chain;…
GRMZM5G839603	Anther-specific proline-rich protein APG (Fragment)	GO:0005618//cell wall	GO:0003677//DNA binding;GO:0003824//catalytic activity;GO:0016787//hydrolase activity	GO:0003006//developmental process involved in reproduction;GO:0006807//nitrogen compound metabolic process;GO:0006950//response to stress;GO:0044238//primary metabolic process;GO:0044260//cellular macromolecule metabolic process;GO:0048731//system development;GO:0050793//regulation of developmental process
GRMZM5G851347	PREDICTED: serine/arginine repetitive matrix protein 1-like [Zea mays]	-	-	-
GRMZM5G859786	PREDICTED: uncharacterized protein LOC103642684 [Zea mays]	-	-	-
GRMZM2G517309	-	-	-	-
GRMZM2G522140	-	-	-	-
