# Supplementary material for: Comparative transcriptomics reveals the difference in early endosperm development between maize with different amylose contents
Source: PeerJ. 2019 Aug 28;7:e7528. doi: 10.7717/peerj.7528 (PMC6717500; doi:10.7717/peerj.7528)
Supplement: Table S5 [file peerj-07-7528-s012.xlsx]

## Sheet: Sheet1
Table S5 Information of DEGs from SD609 and HS68
GeneID	Gene_position	Length	Strand	SD609				HS68				TF	DEGs	Cluster
				5 DAP FPKM	10 DAP FPKM	15 DAP FPKM	20 DAP FPKM	5 DAP FPKM	10 DAP FPKM	15 DAP FPKM	20 DAP FPKM
AC148152.3_FG001	2:231358787-231360623	1599	-	0.155971	0.361296	1.01626	0.393301	0	0	0	0		SD609	1
AC148152.3_FG005	2:231282990-231284358	1155	-	0.287286	2.84113	0.589984	3.11458	0.367195	0.287984	0.231158	0.363193		SD609	4
AC149475.2_FG002	9:152485305-152488367	669	-	102.013	51.241	65.6389	115.337	30.9769	38.7485	85.1996	98.8879		Shared	3
AC149810.2_FG004	9:151597278-151597925	648	-	0.875742	0.258338	0.889677	0.788117	1.24928	0.626761	0.909975	1.42188
AC149810.2_FG008	9:151631194-151634175	2030	+	0.160275	0.929142	0.546886	0.821329	0.584652	1.04313	0.429231	0.60584		Shared	12
AC149818.2_FG001	9:152414975-152420189	930	+	8.31585	7.0133	3.8817	5.05022	12.8179	19.9851	9.56136	12.2297
AC149818.2_FG004	9:152436266-152437593	949	+	59.8027	55.7653	82.8371	50.3612	50.3866	67.5159	64.0183	39.8143		SD609	11
AC149818.2_FG005	9:152441561-152442438	582	-	1.32976	2.74798	2.91902	2.23344	0.937125	2.03527	2.15257	1.11909
AC149818.2_FG006	9:152443043-152445498	590	-	26.6121	33.9559	43.5435	56.3817	20.6137	26.5655	35.7048	35.5493		SD609	6
AC149828.2_FG002	9:150418786-150423446	691	+	73.588	37.4633	69.7293	32.5694	71.4783	59.7431	71.0887	30.873		Shared	16
AC149829.2_FG002	9:151116517-151116771	255	-	1155.05	1286.96	381.77	305.165	395.114	649.404	625.291	791.551		SD609	2
AC149829.2_FG004	9:151128745-151129980	1000	-	0.968337	1.41879	2.28375	1.38831	3.12364	1.89747	1.99544	1.39214	bHLH	SD609	1
AC152495.1_FG012	10:3382115-3385323	2559	-	0.982163	2.11948	0.626322	0.440261	3.64379	3.17846	0.305539	0.601308		Shared	5
AC152495.1_FG017	10:3438490-3441711	3222	-	0	0	0	0	0.591268	1.19107	0	0		HS68	11
AC155352.2_FG010	2:34740816-34741415	429	+	29.2762	0	32.2073	33.001	0.228627	56.3858	27.3898	0.320806		Shared	15
AC155376.2_FG004	8:164135912-164138949	1667	+	11.7809	9.25863	15.057	8.94976	7.10336	4.8226	10.1834	6.06284		Shared	7
AC155376.2_FG005	8:164169975-164178451	2061	-	10.7461	8.39311	8.47194	21.3174	17.053	15.2389	9.08122	23.0868
AC155434.2_FG001	7:173888418-173890521	1496	+	0.257614	0.780888	0.0597176	0.584339	0.269614	1.42562	0.270946	2.13771		Shared	8
AC155610.2_FG007	3:175686403-175689182	1341	+	0.910973	1.77755	6.05901	1.39027	5.65123	1.56213	7.71094	0.909355		Shared	10
AC155610.2_FG009	3:175701338-175701538	201	+	1676.28	526.829	3644.68	2432.09	1195.82	1289.27	111.532	1075.06		Shared	4
AC159612.1_FG007	5:4582263-4584511	2054	+	2.58134	1.7505	4.17871	2.58278	2.84551	2.61018	2.04974	1.29864		Shared	9
AC165171.2_FG002	3:144743920-144745323	1014	+	4.12525	0.557522	6.19661	2.38686	4.00974	1.86413	2.94032	0.854812	WRKY	Shared	7
AC165178.2_FG004	2:181422894-181424932	1811	-	2.70561	2.88834	1.85308	4.09429	0.9051	1.60256	2.22197	2.26596	MYB	HS68	8
AC166636.1_FG007	1:19971564-19973341	1653	-	2.48107	2.77151	4.25653	1.63118	2.71571	1.85831	2.58542	3.03107		SD609	11
AC166636.1_FG008	1:19980603-19983527	1047	+	8.77506	16.0415	18.5368	21.8418	16.066	19.0529	22.481	14.9204		SD609	6
AC166636.1_FG009	1:19985132-19990950	2085	-	0.173075	0.356251	0.364491	0.363723	0.290386	1.62684	0.347504	0.401329		HS68	4
AC177838.2_FG015	1:161143-161925	783	+	3.02982	2.66352	0.554128	1.0348	0	0	0.153653	0.605954		SD609	2
AC177850.2_FG005	1:18199712-18202663	510	+	3.57489	1.25799	5.24413	3.71492	4.70467	8.65556	4.38107	3.04004		Shared	15
AC177893.3_FG006	2:210998897-210999592	696	-	2.13863	1.0455	0.800398	0.283661	1.84119	0.563952	0.545363	0.284343		Shared	6
AC177908.3_FG002	1:72799918-72805502	2634	-	12.2234	7.42035	13.1085	12.8755	14.3893	14.3799	16.3103	12.847		SD609	8
AC177924.2_FG001	2:70717256-70722062	828	-	1.14695	0.636865	0.139398	0.333578	1.04442	0.442114	0	0	bHLH	Shared	6
AC177946.2_FG004	1:19104324-19104800	477	+	11.589	7.73412	2.1199	2.59084	4.88484	7.24534	13.1585	13.083		Shared	11
AC182482.3_FG003	3:23005376-23012937	1880	+	1.22409	2.6687	7.23478	2.71442	3.22803	1.61952	3.51114	1.19128		Shared	14
AC182617.3_FG001	3:127296562-127310329	1634	-	33.3334	17.8621	33.074	16.9678	33.4435	20.152	35.6687	32.3852		SD609	8
AC182838.3_FG006	3:190509605-190510401	372	-	2.38208	4.6587	0	0	0	0	4.9589	3.90745		Shared	11
AC183315.4_FG006	3:28221287-28223015	870	+	0.495294	1.44686	0.912958	0.936374	0.451233	0.517096	1.39712	1.14749
AC183514.3_FG006	3:168427403-168430627	687	-	4.01508	0.828809	0	0.144546	3.23113	2.73007	1.76033	3.04271		SD609	7
AC183932.3_FG007	5:5575816-5578873	2240	+	15.3064	12.6047	4.34573	9.27485	7.83513	7.90895	6.15891	8.44034		SD609	12
AC183950.2_FG003	8:163113316-163183032	1340	+	45.1368	28.3396	63.2053	38.666	45.6686	51.047	40.6592	36.4644		SD609	8
AC183950.2_FG005	8:163218231-163219697	1467	-	0.235797	1.35485	0.398667	0.000137433	0.440697	1.06714	0.707614	0.844999		SD609	5
AC183968.2_FG001	4:241402394-241404692	831	+	0	0.0905346	0.97101	1.21714	1.35915	0.65993	0.920168	1.33125		SD609	6
AC184130.4_FG012	4:235215737-235229977	1535	-	4.37041	6.15532	12.1681	6.00795	9.60735	8.04441	7.27165	4.1326		Shared	9
AC184133.3_FG001	9:72608274-72610234	507	+	2.04382	3.28168	1.76436	0	1.68121	1.15549	1.35095	2.55925		SD609	2
AC184794.2_FG003	4:86442615-86444988	1875	+	0.162501	8.46355	5.41989	4.76238	2.55595	5.90606	7.00966	0.788688		Shared	10
AC185130.2_FG004	5:76093449-76098413	1066	-	4.38034	5.01135	1.50434	1.44044	1.33235	1.35224	4.08801	3.4507		Shared	11
AC185300.4_FG002	4:228011331-228012407	1077	-	1.23917	1.47862	1.81111	1.51341	2.37997	2.61417	0.753601	1.95639		HS68	7
AC185466.3_FG001	4:181668842-181670224	606	+	2.21803	2.86387	1.09545	3.31814	3.51968	3.29856	3.36404	2.62534		SD609	4
AC185475.3_FG001	4:168857087-168858825	621	+	0.533901	0.413546	0.210941	1.5134	0.605553	0	0.323793	0.674329		SD609	4
AC185628.3_FG010	5:7207097-7209188	771	+	0	0	0.999423	5.64106	0	0	0	1.35236		Shared	3
AC186147.3_FG008	4:162908356-162909690	1335	-	27.861	19.0119	22.0228	15.388	23.6019	13.6141	20.627	30.6678		HS68	8
AC186164.3_FG001	4:226722159-226722662	504	+	1.31572	3.11014	2.52566	2.60361	3.90397	3.76499	2.74379	1.89694
AC186166.3_FG008	5:1818155-1820634	2187	+	0.225646	1.26916	0.614062	0.770851	1.80046	1.87004	0.158827	0.0743021		Shared	5
AC186189.3_FG004	1:283384244-283386967	693	+	10.6473	7.36483	4.7432	5.28079	5.2493	4.39817	13.1719	10.3008		Shared	11
AC186231.4_FG002	1:202624720-202625559	840	+	0.173053	0.981444	7.04055	0	0.157606	0.108399	1.18581	0.109336		Shared	14
AC186433.4_FG001	6:86277617-86278228	612	+	2.04779	0.564026	0.107878	0	0.123814	0	0.552073	0.517102		SD609	7
AC186577.3_FG006	6:1996014-1996736	723	-	0.213097	0.439765	0.67345	0	1.1625	0	0.602044	0		HS68	1
AC186585.4_FG002	6:15264372-15265949	710	+	2.70977	2.09906	2.46245	1.02492	2.3349	2.2022	3.17765	0.342134		HS68	1
AC186603.6_FG003	1:168693316-168694764	1449	-	0.568641	2.3421	1.03642	2.42651	0.639691	1.42519	1.12526	0.553114		Shared	12
AC186845.4_FG009	7:163756211-163756528	318	-	3.74764	1.45138	0.848004	2.67987	0.470072	0	7.11396	9.42265		HS68	8
AC187092.6_FG003	8:70564699-70565112	414	+	0.821993	5.40179	0.216675	2.4133	0	2.74257	0	1.72586		Shared	12
AC187157.4_FG005	8:22640767-22645283	2656	-	0.296799	1.34115	1.68213	1.90716	0.935822	0.841972	0.486065	0.363285	HD-ZIP	Shared	4
AC187222.4_FG001	3:139283031-139286078	902	+	7.84017	4.491	10.458	3.97009	10.2019	6.22063	7.352	11.1475		SD609	11
AC187243.3_FG005	8:123614699-123615250	552	+	0.804991	3.49494	0.508952	0.405569	0.874298	0	0.260843	2.03193		Shared	13
AC187262.4_FG007	1:184699439-184700602	935	-	106.82	24.8772	234.071	214.963	66.8625	57.4686	162.956	90.1923		Shared	14
AC187263.4_FG001	8:24766490-24767041	552	-	7.83539	4.32794	2.42029	8.21908	3.64859	4.55502	1.76003	5.79195		Shared	3
AC187393.3_FG001	8:13664900-13665927	714	+	0.759357	1.11941	0.257123	0.683471	0.0986147	1.4947	0.788184	0.137028		HS68	4
AC187551.3_FG002	8:94438246-94440159	1914	-	0	1.38865	1.06457	0	0	0.748606	1.29713	0		Shared	10
AC188003.3_FG012	4:1078563-1079020	366	+	6.16229	5.28132	43.8322	0.455317	28.3939	6.79882	34.9985	0.455995		Shared	10
AC188023.3_FG005	6:165316824-165317565	462	+	23.7851	24.8637	29.5983	29.3892	25.3886	9.92351	11.8207	23.3254		HS68	2
AC188831.3_FG005	2:9495924-9496382	459	-	1.11484	3.00249	1.05763	4.2104	0.602297	0.837212	1.2695	0.843357		SD609	4
AC189280.3_FG001	4:171842284-171845974	639	+	0.76666	3723.96	0	0	0	0	10327.6	671.455		Shared	11
AC189750.4_FG004	7:152351424-152354834	2107	-	12.7926	26.2314	13.2465	23.1294	32.9128	39.6029	14.7684	28.1628		Shared	5
AC189879.3_FG003	9:86401833-86408268	3516	+	0.656823	2.81258	2.30937	2.54646	1.62686	1.60036	1.03616	0.609398		Shared	4
AC190609.3_FG002	4:194340274-194342652	545	-	4964.43	1010.89	3229.94	1345.66	2033.43	1698.87	2145.68	2170.18		SD609	3
AC190609.3_FG003	4:194340198-194344253	3278	+	21.2705	21.5875	21.525	17.3104	12.7674	16.0399	14.2783	29.4309
AC190609.3_FG004	4:194405480-194411146	2126	-	5.25162	6.02813	5.47099	3.82554	4.25405	4.42364	2.66329	3.72029
AC190623.3_FG001	3:192033467-192033931	384	+	10.9932	8.40116	10.2302	8.12947	28.0069	21.0291	8.73637	15.0587		HS68	9
AC190636.3_FG005	5:813734-814828	1095	-	2.20987	4.93311	5.57602	2.70835	4.08976	8.0762	4.19941	3.80238		Shared	15
AC190792.2_FG006	2:1309281-1353156	1444	+	14.3676	27.7317	18.1479	31.7903	17.5833	34.8858	24.1917	39.8486		SD609	4
AC190811.1_FG003	2:145421834-145422160	327	+	0	0	0	9.23334	3.89565	16.5756	0	0		Shared	5
AC190816.3_FG007	4:36485915-36488284	2370	+	0.175187	1.62249	0	0.189347	0.22911	0.250931	0.80379	0.411529		Shared	13
AC190882.3_FG003	8:40945691-40946202	249	+	3.35576	7.27181	18.7755	6.17974	13.5923	8.28413	16.5416	10.3723		SD609	1
AC190885.4_FG006	4:184951428-184952156	729	+	1.05299	1.41242	0.748741	0.53076	0.478745	0.131901	0.934899	0.133017
AC190925.2_FG002	5:115287803-115288282	480	-	7.30611	3.73604	4.87767	3.17936	7.16885	4.17293	4.02837	7.30735		SD609	3
AC190933.3_FG004	3:16614267-16616203	900	-	19.1778	6.10194	10.8479	14.324	5.75537	8.1679	5.88024	12.3676		SD609	3
AC191048.2_FG006	5:4152455-4153135	681	+	3.25363	2.63867	2.01987	5.85659	3.48367	4.94856	1.78328	2.64173		Shared	3
AC191050.3_FG003	2:57649929-57652315	1689	+	1.90361	73.4499	6.59194	224.415	1.10486	67.8073	0.441237	8.28704		Shared	3
AC191069.3_FG004	8:37658183-37661513	312	-	93.9367	42.3583	94.6946	75.4619	65.775	54.0205	78.6655	66.3832		SD609	8
AC191097.3_FG007	4:195326341-195327036	696	+	3.71446	2.091	2.75693	2.26928	5.319	7.47236	2.72681	4.97601		HS68	7
AC191113.2_FG002	2:6354513-6356489	1977	-	0.103382	0.181154	0.726054	0.000767167	2.56047	0.00234207	2.84835	0.000888732		Shared	10
AC191251.3_FG005	5:4975268-4996103	1320	+	6.23167	4.27341	9.43049	5.37101	13.1209	10.3866	10.833	9.59116		SD609	8
AC191254.3_FG001	5:176191590-176193125	588	-	0	0	2.18251	1.83111	0.263468	2.73048	0.235265	0.367006		Shared	4
AC191264.3_FG002	7:150153355-150158910	1028	+	1.95181	1.16375	2.08084	3.36919	1.77089	2.76048	2.1599	3.77284		SD609	6
AC191283.3_FG004	2:114763714-114789408	3963	+	5.3287	5.06992	8.6288	4.92626	5.11404	7.05204	5.26698	3.31992		SD609	9
AC191534.3_FG003	7:27649770-27672146	2791	+	28.6838	43.2978	18.6536	21.5613	23.6564	32.5793	25.9264	32.3648		SD609	2
AC191575.2_FG001	1:295271450-295299652	1122	-	0	1.10437	0	0.217056	0.0784258	0.107879	0.138832	0.108812		SD609	5
AC191589.3_FG003	1:72598205-72598989	600	+	0.281602	0	0	0	0	3.17391	0	0		HS68	4
AC192244.3_FG007	5:76217166-76222777	3119	+	1.45477	2.16224	1.96431	2.04976	3.47095	4.44758	1.95442	5.05201
AC192362.3_FG002	1:230119710-230123616	2480	+	7.58534	12.107	12.0185	8.72766	2.51558	1.76066	4.83701	4.43595		HS68	3
AC193324.3_FG002	10:137902848-137995683	4652	+	18.0965	18.7331	19.0584	15.6966	31.7892	19.8228	16.6835	12.3259		HS68	5
AC193430.3_FG008	8:143093861-143094625	765	-	1.08215	1.21778	0	0	0	0	0	0		SD609	2
AC193499.3_FG004	2:174553617-174554321	705	-	0.070898	0.114015	6.26171	3.78094	6.08434	5.34486	8.41927	5.43142		SD609	9
AC193500.3_FG003	1:1780238-1781389	1152	+	1.21048	0.356283	0.728465	0.290657	0.894607	1.08341	1.29865	0.801587		SD609	3
AC193591.3_FG001	4:226791362-226791868	507	+	1.11608	0.192445	4.70489	1.40546	0	1.86302	4.528	1.40801		Shared	10
AC193632.2_FG002	4:39794254-39796948	2312	-	0.282939	0.446202	0.487483	0.252263	0.642703	0.334692	0.640215	1.05602		HS68	8
AC194022.3_FG013	3:2783126-2783395	270	+	50.5831	173.43	9.46973	25.2249	8.88093	7.24826	8.34054	0.912056		Shared	13
AC194097.3_FG008	8:173750803-173760583	621	-	2.86606	1.66012	0	0	0.958081	4.43288	1.17105	1.35244		Shared	6
AC194112.3_FG001	8:66098326-66099375	1050	-	3.68807	6.53371	5.21307	5.30149	4.3096	3.56714	3.75021	2.20831		HS68	1
AC194298.3_FG005	3:204583775-204583963	189	-	50.2933	0	55.4176	330.106	500.482	68.6844	63.902	77.1106		HS68	5
AC194321.3_FG009	5:174446738-174447238	501	+	2.08953	0.196542	1.50142	1.19597	1.37218	0.713393	2.00419	1.43771		SD609	3
AC194341.4_FG002	8:141393007-141395668	782	-	198.654	103.633	210.914	150.185	237.836	170.721	181.582	164.19		SD609	8
AC194341.4_FG004	8:141377175-141379250	1706	+	1.87555	2.97374	3.35224	1.9284	1.80498	1.26991	2.20955	1.26958		Shared	2
AC194389.3_FG001	1:80167006-80183074	2221	-	12.0296	20.6977	14.0146	12.8496	11.9363	11.9864	14.0778	6.97187		HS68	1
AC194425.3_FG005	3:191278501-191278839	243	+	20.2302	130.227	73.14	66.9848	40.3518	74.4241	99.8951	19.9806		Shared	13
AC194439.3_FG002	8:85418692-85424667	5458	-	2.68478	4.47514	0.864438	0.915619	0.955928	0.676264	2.73369	1.19313		Shared	13
AC194609.2_FG003	1:176048282-176048980	699	-	3.24389	1.76363	1.16098	2.4273	2.12696	2.10171	1.61894	0.578403		Shared	6
AC194712.3_FG002	4:151295735-151296493	759	-	0.0994666	0.410438	0.157166	1.37881	0.452448	0.249199	0.240758	0.628307		SD609	4
AC194878.3_FG002	9:25684589-25685125	537	+	0	0	0	0	0	0	1.77593	0.850812		HS68	3
AC194914.3_FG002	1:99538428-99539066	639	-	37.4385	24.1447	21.6064	20.445	24.2376	24.0048	22.8259	15.1671
AC194937.3_FG004	5:118931065-118932228	735	+	2.02108	6.87255	10.0849	4.94074	5.78227	2.71559	8.35102	2.2315		Shared	2
AC194965.4_FG001	6:127377811-127382429	2850	-	2.49436	3.93728	7.57979	7.59561	6.38664	5.36261	2.9378	1.75916		Shared	4
AC194965.4_FG004	6:127446073-127447275	432	-	1.00407	2.08208	0.99239	7.26639	1.35299	4.39766	1.43185	3.1634	GATA	Shared	3
AC194970.5_FG001	2:207236995-207238335	1104	-	6.01547	9.01465	4.5595	15.7788	6.98776	8.37493	6.8951	12.1364		SD609	4
AC194970.5_FG002	2:207226133-207227831	1429	-	5.73581	3.57758	6.91214	4.40746	6.5021	4.56901	10.2993	7.58537	BES1	Shared	16
AC194980.3_FG002	4:177605987-177606388	402	+	150.214	43.6269	64.017	39.8577	86.3106	53.9391	100.797	110.425		Shared	6
AC195168.2_FG004	3:71646588-71646926	339	+	7.53016	2.31108	0	0	1.56677	10.5173	3.29028	1.66948		Shared	6
AC195340.3_FG004	5:5377637-5383370	4262	-	7.72769	9.92804	2.97544	19.3289	5.61284	12.2866	5.03149	15.9033		Shared	8
AC195347.4_FG004	5:180876768-180878219	1452	+	9.11078	11.3281	4.76634	5.3928	5.51962	5.76454	7.23969	6.83919		SD609	2
AC195587.4_FG004	6:78610195-78626233	4603	+	1.86122	3.99457	5.13745	3.97546	4.22857	8.03585	5.10427	2.55948		Shared	15
AC195860.3_FG005	6:163870844-163873846	767	+	4.93155	3.75099	2.18153	5.1529	4.59577	6.4131	8.22427	3.32521		SD609	12
AC195864.3_FG017	7:167500409-167502067	1659	+	0.896875	0.846366	0.767359	0.848107	0.580976	0.655651	1.021	0.425332		HS68	6
AC195980.2_FG004	3:143816074-143819209	2142	-	3.00974	1.71178	0.0246272	0	0	0	1.01632	1.34467		Shared	6
AC196059.3_FG003	9:150711305-150714399	1130	-	4.48637	2.12852	4.61607	2.82778	3.28706	2.81077	4.41777	3.50744		SD609	8
AC196082.3_FG001	8:99954430-99955095	666	-	1.56112	2.10742	0	0	0	0	1.06722	1.36494		Shared	11
AC196090.3_FG006	9:154016088-154018334	2247	+	7.72413	5.24465	13.7931	14.2247	12.7799	10.9781	10.295	13.8995		SD609	6
AC196156.3_FG003	1:261093688-261132663	282	-	0	0	0.473363	16.7258	0	7.59618	0.378725	0		Shared	3
AC196206.3_FG007	2:2959131-2960069	585	-	1.02582	1.96837	0	0	0.398545	0.550605	2.37203	0.55499		Shared	11
AC196259.2_FG010	8:144854960-144864898	1190	+	3.15353	2.00939	4.00014	5.1037	6.96329	3.09856	6.96987	3.12295
AC196278.2_FG003	4:208395843-208488216	3867	-	13.4068	8.21929	16.819	10.3448	15.13	13.159	15.5462	7.90785
AC196394.3_FG002	1:16626949-16628169	709	+	2.09124	2.14859	0.08658	0.516572	1.59374	1.92168	0	0		Shared	1
AC196417.3_FG008	3:155345465-155346046	482	+	68.2631	134.656	670.606	80.2998	229.494	108.524	981.987	20.0222		Shared	10
AC196439.3_FG002	10:107148061-107153897	2433	+	2.51088	0.166942	0	0.0311506	0	0.395063	0.0595214	0.123026		Shared	6
AC196465.3_FG002	8:149888154-149888780	627	+	5.39232	4.34625	3.94913	6.62782	3.81854	7.41222	3.82811	8.80165		HS68	2
AC196475.3_FG004	4:32249373-32251536	1095	-	116.313	391.286	329.893	241.333	224.994	257.849	316.799	190.989		Shared	2
AC196489.3_FG002	2:63943718-63944981	501	-	40.4932	36.617	128.946	65.939	110.563	106.105	81.5138	31.9431		Shared	15
AC196708.3_FG006	4:237687877-237688275	399	+	3.2629	2.77216	2.8152	4.85026	4.77843	4.45292	1.21223	3.36187		HS68	7
AC196710.3_FG013	2:232890803-232891213	411	-	0	0	0	3.85084	1.49636	2.78498	0	1.75248		Shared	5
AC196779.3_FG003	6:69566698-69567925	900	+	1.73626	2.11534	1.18454	1.59155	1.07883	1.48315	2.41644	1.79529		HS68	3
AC196961.2_FG003	7:148082947-148083258	312	+	61.7276	43.5787	135.603	53.2426	84.3506	92.2776	125.546	84.978		SD609	9
AC197029.3_FG003	7:105497941-105508767	2685	-	13.504	11.8246	4.06377	3.23809	7.28032	11.2668	10.0976	14.6648		SD609	2
AC197047.3_FG001	4:75974913-75975576	558	+	0.316324	0.817394	0.999959	1.79295	0.286367	0	0.384301	0.199623		SD609	6
AC197146.3_FG001	10:2480007-2481833	1827	-	6.22531	1.37806	4.94293	3.41826	4.74581	8.38906	6.31877	4.99485		SD609	3
AC197146.3_FG002	10:2466640-2467603	870	+	0.660392	1.53197	0.912958	0.832333	0.902466	0.723935	2.19547	1.56476	MYB	HS68	3
AC197246.3_FG003	1:191987674-191990586	565	+	242.23	94.9936	246.544	133.524	212.751	204.918	200.917	212.584		SD609	8
AC197274.4_FG010	4:180264138-180264831	465	-	5.22155	6.30906	7.22382	4.10856	7.64356	2.72318	9.9064	7.40694		HS68	3
AC197340.3_FG003	2:41965482-41965856	168	+	135.029	323.368	2577.45	2248.76	1033.88	408.132	1591.58	335.67		SD609	6
AC197355.3_FG001	5:104969846-104970052	207	+	25.9729	30.7173	203.216	84.766	46.0435	35.2257	110.021	15.0767		SD609	9
AC197377.3_FG001	4:43119843-43120620	645	-	0.881886	1.95119	0.796376	2.9696	5.34311	6.11492	0.101824	1.27274		Shared	5
AC197377.3_FG004	4:43177947-43182953	2125	+	0.784711	0.12407	0.942743	1.28031	1.24415	0.934479	0.639578	1.41579		SD609	6
AC197387.3_FG004	1:63919534-63919998	465	+	4.8129	11.1425	0.0222387	7.30801	0.370507	3.04462	0	0		Shared	13
AC197427.3_FG003	4:206165635-206169362	1011	+	0	0	0	0	0	2.89182	0	0		HS68	4
AC197432.4_FG001	1:185554731-185555657	927	-	3.26448	1.72163	1.4393	1.62672	0.276813	0.475582	1.40666	2.20681		Shared	11
AC197555.3_FG008	3:227494431-227495354	924	+	30.3469	19.2695	10.5521	6.48202	21.529	14.3136	14.2751	14.202		SD609	7
AC197575.3_FG008	2:32496378-32499262	546	+	1.87755	0.188487	2.42826	2.36472	2.16029	0.82109	0	0.22992		Shared	4
AC197699.3_FG008	9:17056140-17058782	1839	+	0.0332217	0.170981	2.63797	2.49227	0	0	0.240201	0.378146		Shared	4
AC197705.4_FG001	8:118165588-118167724	1830	+	164.764	48.8299	84.3748	97.3024	164.787	113.042	115.458	314.048		Shared	8
AC197705.4_FG003	8:118102992-118103722	649	-	9.24031	153.555	5.28158	176.034	12.7068	13.3932	5.37915	18.6183		Shared	12
AC197705.4_FG006	8:118186657-118188309	1653	+	13.6411	12.2299	5.3356	8.94277	7.67309	7.53724	7.69224	10.7504		SD609	12
AC197705.4_FG011	8:118078199-118090973	3148	+	2.04878	1.62065	2.95909	2.26433	5.64628	2.38468	5.01546	5.23128		Shared	16
AC197758.3_FG004	4:183929142-183944284	1269	+	0.495265	0.582727	2.34337	0.259644	6.11054	0.768149	6.30026	1.58981		Shared	10
AC198206.5_FG001	5:128454834-128463337	1752	+	2.10631	1.62617	1.74667	0.929514	1.95872	0.527937	1.5513	1.59828		Shared	7
AC198371.3_FG003	10:5912898-5913966	759	+	0	1.0261	0	1.50416	0.0904897	0	0	2.51323		Shared	8
AC198380.3_FG001	7:101875286-101876777	1258	+	0.673012	1.38636	1.10403	0.522126	1.37132	0.778478	0.832803	0.785463		SD609	10
AC198418.3_FG005	1:295106808-295189877	2632	+	3.07695	4.40027	3.37505	5.22202	5.4304	7.50279	3.2013	3.43609		HS68	11
AC198490.3_FG003	8:106277379-106278861	782	+	0.477087	0.0984165	0.15076	0.480978	0.260499	0.478174	0.307853	1.2055
AC198518.3_FG002	3:107406722-107407300	579	-	0.148977	0.923629	0.588651	1.31364	0.809831	1.49246	0.361766	1.88059		Shared	8
AC198700.2_FG004	2:220646372-220647259	888	-	0.404358	0	6.84789	0.374585	1.75933	0.929601	6.94705	0.55052		Shared	10
AC198725.4_FG007	3:217230993-217244458	3690	-	10.1503	12.2352	18.4124	8.2706	15.802	9.72868	12.3386	8.08601		Shared	14
AC199039.3_FG003	8:135455108-135456085	978	+	0.637451	5.10975	0.67138	2.7676	0.516725	1.50861	0.912632	1.16379		Shared	13
AC199058.2_FG001	10:19588511-19590481	408	+	6.78293	9.38682	3.35259	4.97787	5.06454	6.71823	8.07746	5.69578		SD609	2
AC199067.2_FG004	3:176451543-176452178	636	+	4.24685	4.3853	3.76248	1.94564	3.15337	4.51298	3.95318	2.92511		SD609	2
AC199315.4_FG001	8:138225306-138225551	246	+	129.488	91.009	0.313182	99.7603	39.4292	9.7694	0	7.56142		Shared	6
AC199363.4_FG003	8:84943640-84987722	5280	+	11.3601	13.7594	6.06598	11.3638	8.32724	10.4891	9.25151	11.5596		SD609	2
AC199382.3_FG005	10:136339578-136340304	477	+	0.207508	0.214837	1.14826	1.30633	3.18046	0.519499	0.674448	2.09355		HS68	5
AC199526.5_FG003	3:58872305-58884154	2160	+	0.3994	2.01159	1.23223	3.75485	0.723353	1.29089	1.43155	1.47857		Shared	3
AC199541.4_FG001	1:78406032-78407587	1398	+	7.89419	6.3435	2.23448	0.575293	6.79728	5.26076	5.90673	5.88529		SD609	2
AC199541.4_FG004	1:78327323-78328878	1398	-	2.46408	2.34945	1.4416	0.345176	2.96078	1.71547	1.7977	1.67327		SD609	2
AC199541.4_FG007	1:78363842-78365263	1422	+	1.78888	1.98021	2.08399	0.78937	0.940088	0.784606	1.04269	0.961354		SD609	11
AC199571.3_FG001	10:93227265-93232585	1911	-	5.60252	5.1153	1.36262	5.91111	1.54538	2.12542	2.57187	3.41253
AC199571.3_FG004	10:93222472-93225832	998	+	5.3309	5.5626	3.78267	6.39442	3.65576	3.20006	7.5392	1.88759	MYB_related	HS68	6
AC199703.3_FG003	10:34498823-34499338	516	+	0.72163	1.86611	0	1.59039	0	0.90347	0.292661	3.86949		Shared	8
AC199705.3_FG008	10:129921291-129944499	3063	+	1.10656	3.2404	1.55864	1.43666	1.28428	1.27433	0.778819	2.25289		Shared	13
AC199771.4_FG001	8:134116722-134117057	336	+	1.51249	3.05425	9.93186	1.8431	7.46269	0.000339045	1.64337	7.5706		Shared	4
AC199779.3_FG006	4:170806542-170807060	519	-	4.26824	10.4359	2.68228	1.57457	6.09065	4.59174	5.8201	3.12161		SD609	2
AC199782.5_FG001	2:194391400-194396368	2077	-	52.1125	24.2973	45.6642	32.5513	50.7316	40.2422	45.3685	58.6039		SD609	3
AC199820.4_FG006	2:209929767-209930804	725	-	2.86349	17.2553	48.4708	11.9717	12.5765	19.9818	47.2839	1.21649	MYB_related	Shared	10
AC199911.5_FG001	10:72978056-72978856	801	-	0.0923085	1.14243	0.2917	3.37365	0.672224	0.462554	0.0744425	0.233264		SD609	4
AC199961.4_FG001	10:146760294-146766983	2224	+	0.268476	0.0934187	2.33228	2.09891	1.62191	1.51417	0.0646781	0.4075		Shared	4
AC200207.2_FG001	1:131602063-131602836	735	-	3.43459	1.18122	1.23343	1.83615	5.77357	4.56305	2.93996	1.84069		Shared	5
AC200209.1_FG001	UNKNOWN:5433681-5435940	1326	+	1.12181	1.101	0.593338	0.918962	0.665975	0.304473	0.898794	0.552989		HS68	10
AC200210.1_FG006	3:225906457-225927850	3713	-	29.7119	24.5852	14.1175	26.6994	23.2539	27.6925	20.365	40.7201
AC200287.4_FG006	6:86042427-86047290	1134	-	0.587736	0.847684	0.232121	0.444547	0.214613	0.926937	0.567541	1.33742		Shared	8
AC200887.4_FG002	5:143514928-143515692	513	+	6.74281	5.27843	3.02486	5.27842	4.77481	5.70392	2.80883	9.42672		HS68	2
AC201985.4_FG003	6:126651393-126651997	543	+	0.165448	0.342102	2.22289	3.75087	1.79626	2.0716	0.268131	0.835177		Shared	4
AC202011.3_FG010	1:206340907-206341623	717	+	0.0109517	1.13779	0.221473	0.429543	0	0.40751	0.262822	0.148196		SD609	5
AC202110.3_FG004	7:77920300-77924448	3111	+	0.0626725	1.1957e-05	1.79436	3.22892	0.907678	0.813002	0.903607	0.720507		SD609	6
AC202185.4_FG004	1:122162694-122163480	627	+	0.52608	1.90149	18.0829	3.811	5.72781	4.77676	14.5681	2.6571		Shared	10
AC202384.4_FG009	2:211430066-211431078	894	-	0	0	0.566075	0.903182	0.0725557	2.09481	0	0		Shared	5
AC202432.3_FG006	8:167199719-167203242	1453	+	0.917067	1.30655	1.01953	0.567284	0.981851	1.30438	1.75982	0.43453		Shared	10
AC202439.3_FG001	6:113720108-113720674	567	+	1.07864	2.22948	3.40969	2.13505	1.2559	0.964771	0.873387	0.583492		SD609	1
AC202567.4_FG004	5:155039021-155044232	2367	+	5.61683	2.21239	2.74022	4.26886	1.00329	2.67029	0.0866266	0.257536		Shared	3
AC202707.3_FG002	4:49937683-49941888	1489	+	3.02137	4.32662	6.69207	2.99118	1.62656	1.75201	5.27853	1.99573		Shared	2
AC202855.3_FG004	4:195622459-195623127	669	+	0.119289	0.246278	0.942534	1.20241	0.541714	1.34469	0.578221	0.753274		SD609	6
AC202877.3_FG002	8:57909851-57911305	1113	-	0.0601517	0.0619714	0.0475123	0.379135	1.15298	0.678339	0	0.532291		HS68	5
AC203019.3_FG001	1:262565832-262566592	720	-	0.643108	1.5484	0.508104	1.21558	0.292344	1.74539	0.51914	1.89553		HS68	2
AC203048.3_FG001	5:21213907-21217105	511	-	26.068	25.2134	6.52603	16.6167	21.5356	29.7588	31.9143	24.3983		SD609	12
AC203090.3_FG005	1:214988188-214993760	1135	-	3.72805	2.88742	3.34594	1.18418	1.87965	0.524323	3.25055	2.71458		Shared	7
AC203093.3_FG001	6:26715229-26722555	5884	+	0.591408	0.441024	0.493823	0.884488	0.736173	1.03065	0.731381	0.430204		HS68	4
AC203173.3_FG004	8:175215582-175220817	3068	-	414.46	218.563	287.851	274.496	563.25	477.783	480.401	469.308
AC203294.3_FG008	8:171169868-171170176	309	+	7.64333	0	1.3972	1.46982	6.16599	0.733962	6.86024	2.94776		Shared	16
AC203294.3_FG012	8:171193955-171194488	534	+	9.69861	3.34288	7.79975	1.50008	2.61601	0.639125	6.48218	1.50299		Shared	7
AC203359.3_FG001	5:184825930-184826364	435	+	0	0	9.99487	11.761	2.19676	3.25401	0	1.55999		Shared	4
AC203394.3_FG004	2:127598915-127600727	510	-	2.02517	2.28552	4.22005	2.78215	1.66311	1.84394	3.1365	6.2713		HS68	2
AC203535.4_FG002	3:157576117-157577069	741	-	27.6763	34.6046	11.6239	85.5701	76.8239	115.09	34.6235	130.104	NAC	Shared	8
AC203535.4_FG004	3:157585924-157588143	1113	-	0.481214	0.681685	0.712684	1.66819	0.219616	0.376855	0.0968161	0.760416		Shared	3
AC203535.4_FG006	3:157416242-157417530	927	-	1.60503	1.71194	2.28266	0.996608	1.17555	1.93875	1.71595	2.45127		SD609	11
AC203672.3_FG001	7:114556252-114556716	465	-	0.870258	3.37985	0	0	0	0	0	0		SD609	2
AC203752.5_FG002	6:96678707-96698315	4302	-	59.9318	42.677	62.0179	58.2472	106.802	92.4824	78.0879	44.4233		HS68	1
AC203753.4_FG006	7:36511675-36544813	3636	+	9.59981	0.253949	2.58213	0.632281	0.52401	0.311223	3.47794	1.01454		Shared	6
AC203754.4_FG008	6:151130567-151135142	1912	-	9.02854	3.76298	4.59453	8.89877	9.07499	13.9845	6.99705	12.5044		SD609	3
AC203761.3_FG002	9:35402616-35464419	4154	+	2.5968	5.8753	7.70129	3.07952	5.46789	3.99164	3.52887	3.61134		Shared	2
AC203847.3_FG004	8:133025594-133027927	840	+	0.778738	1.23726	19.5193	1.30861	7.95291	0.216799	17.9761	0		Shared	10
AC203847.3_FG009	8:132964925-132966655	1098	+	0.0611763	0.195569	0.0967613	0	2.69338	0.229963	0.248386	0		HS68	5
AC203862.4_FG001	8:78638029-78639525	1497	-	1.22092	1.4305	0.764775	1.22084	0.500321	1.31899	0.372257	0.26619		HS68	4
AC203862.4_FG002	8:78640407-78643457	2205	-	9.89306	11.8827	4.30243	10.424	7.96356	11.3119	9.01105	15.2215		SD609	4
AC203865.3_FG001	3:119976377-119979899	1368	-	18.7961	26.0197	12.0996	9.49717	13.5776	9.53739	9.2964	12.1529	CPP	SD609	2
AC203909.3_FG003	4:32229860-32231506	1647	+	0.602935	0.543123	0.0892847	0	4.82454	7.41435	1.21128	1.52498		Shared	5
AC203909.3_FG006	4:32162277-32162762	486	+	3.61	1.86831	7.2926	4.54547	6.33227	7.53175	7.00419	7.33569		SD609	9
AC203909.3_FG007	4:32164015-32165649	1635	+	0.0380024	0	1.20054	0.191658	0.382269	0.0476248	0.916173	0.0480587		Shared	14
AC203925.3_FG002	4:22697227-22712080	2148	+	3.96656	10.2424	5.13934	5.39842	4.08846	3.43745	5.82243	2.77064		HS68	6
AC203957.3_FG004	2:174469304-174470553	1116	-	0.239804	1.79447	8.73666	1.19055	2.41026	6.44293	6.33925	0.075788	bZIP	Shared	10
AC203966.5_FG002	1:299638957-299642749	666	-	0.240173	0.123967	1.04372	2.8748	1.41778	2.10572	0.485099	0.909962		Shared	3
AC203966.5_FG003	1:299608577-299609401	825	+	0.0793669	0	0	0.000252803	0	1.15209	2.1633	0		HS68	6
AC203966.5_FG005	1:299528035-299529150	1116	-	15.1076	18.3439	67.0527	18.5912	44.7622	19.6813	41.4432	16.6734		Shared	14
AC203966.5_FG006	1:299542046-299545429	747	-	0.305161	1.36425	0	0.128184	0.0925225	0.127421	0.0820831	0		SD609	5
AC203985.4_FG005	10:79370667-79371107	441	-	8.80379	11.8747	0	0.00503158	0	0.530545	14.2874	4.89816		Shared	11
AC204007.3_FG008	8:164356857-164357342	486	+	15.0417	7.05808	14.5852	4.54547	7.23689	5.52328	5.5382	7.08273		SD609	11
AC204070.3_FG004	7:36208270-36236263	3044	+	16.1305	11.4668	6.14247	9.77022	10.4474	10.24	12.7883	13.1452
AC204254.3_FG001	8:8730984-8731430	447	+	0.371893	1.97851	7.40975e-05	10.8483	2.2285	3.50081	3.72567	2.20524		SD609	4
AC204292.4_FG002	6:137030625-137032622	1998	+	0.246996	0.569005	0.116617	0.420413	1.65107	2.20402	0.913309	0.290232		Shared	5
AC204472.3_FG002	9:37264105-37285252	1175	+	1.03231	2.11353	1.98073	0.891875	1.59235	2.14102	0.724516	2.11317		SD609	10
AC204530.4_FG003	1:61621307-61622780	1098	-	0.244763	0.882416	0.241611	0.0771179	0.502509	1.53311	0.246216	0.309343		Shared	5
AC204530.4_FG006	1:61666123-61670385	2743	+	0.810168	1.86637	1.94855	2.41569	1.96671	1.07208	1.18148	0.707121		Shared	4
AC204539.4_FG001	2:189543918-189555416	551	+	6.3836	11.2659	4.35134	8.46841	5.45145	5.64824	1.70496	6.15899		Shared	12
AC204563.3_FG011	7:11792188-11803138	2180	+	2.15778	1.64965	0.851106	0.89574	2.43618	5.00086	1.46575	3.23397		SD609	7
AC204604.3_FG008	5:200441505-200442870	853	+	13.6502	16.4803	13.6945	13.3103	23.0924	17.4464	8.91476	9.62959		HS68	9
AC204619.3_FG003	8:146924732-146925124	393	+	0	0	0.485256	0	7.13203	5.7559	0	0		HS68	9
AC204662.3_FG005	6:14780938-14781546	609	-	0.137565	1.56301	0.326114	0.519908	0.873258	0.516839	0.222536	0.34737		SD609	5
AC204711.3_FG002	10:102366411-102371816	2078	+	1.25146	3.95098	19.8696	38.0161	6.11291	8.9299	9.52338	6.14577		SD609	6
AC204711.3_FG003	10:102311847-102320525	1096	-	165.889	217.356	194.887	348.417	416.806	608.518	166.034	297.24		Shared	5
AC204712.3_FG002	3:199982366-199984383	739	-	22.028	15.2445	36.1965	16.3797	24.5274	18.1975	22.0987	15.6274		SD609	11
AC204763.2_FG001	6:159470220-159471460	897	+	0.237808	0.572035	1.44025	0.599465	0.505663	0.496564	0.894219	0.400713		SD609	1
AC204891.4_FG001	4:151916441-151922092	2256	-	0.624471	0.939049	1.0308	0.818339	0.413259	0.391118	0.523521	1.08453		Shared	3
AC204931.3_FG004	1:54339214-54340577	354	+	2.76027	2.46483	4.36847	3.46475	7.35171	5.42244	2.60801	0.995463		HS68	9
AC205008.4_FG002	7:21633292-21636720	2968	+	0.332455	0.282116	2.13443	1.99735	0.182885	0.110933	1.86843	2.95221		Shared	14
AC205012.3_FG002	8:77431960-77434618	2585	-	2.98779	1.97561	5.91012	2.74819	4.84957	3.11498	2.6729	3.30523		SD609	9
AC205033.4_FG004	9:71260994-71261374	381	-	0	0	0	0	0	0	4.04548	3.31532		HS68	3
AC205035.3_FG004	6:128775648-128779902	2521	-	3.09388	5.69058	4.61752	4.67038	2.40919	1.94377	0	0.243868		Shared	13
AC205057.3_FG002	4:84831997-84833223	1227	-	6.43602	2.75581	4.53691	4.58551	4.39148	2.73838	3.53904	4.30755		SD609	3
AC205057.3_FG004	4:84835641-84847440	11204	-	1.0799	6.07821	1.44315	1.88728	1.0975	1.54756	1.78254	1.2281		Shared	13
AC205077.3_FG003	1:103559787-103560460	603	-	8.66173	9.38033	3.75351	6.86385	1.39336	2.97428	2.93839	8.28991		Shared	11
AC205320.3_FG004	7:6069942-6070566	579	+	8.19376	5.84965	11.1844	5.06688	7.42345	5.41017	6.51179	5.4537		SD609	11
AC205326.3_FG002	8:168669880-168670857	978	+	3.46592	2.22173	2.85835	3.38946	1.5813	1.22565	4.23033	2.9388		HS68	3
AC205345.3_FG002	6:89785632-89788795	1356	+	0.662401	1.07195	0.560547	0.656156	1.51316	0.830071	1.1794	1.25634
AC205362.4_FG002	6:18156459-18158445	1455	+	1.26236	6.09574	14.4051	7.24426	2.38725	1.25464	5.63392	1.48617		Shared	14
AC205376.4_FG003	4:79539415-79587397	796	-	0.465531	1.18733	1.49027	1.65955	0.597683	0.360496	1.66134	0.711069		Shared	2
AC205471.4_FG003	8:125180331-125182094	1341	+	2.39731	2.22194	1.93131	2.11565	1.05139	2.163	1.69641	2.00059	HSF	HS68	2
AC205471.4_FG007	8:125226068-125226454	387	-	37.9178	54.3091	95.5529	64.9424	103.34	175.216	61.2218	115.865		Shared	5
AC205502.4_FG004	1:59467407-59469906	1614	-	0.732903	1.11195	1.71739	0.583617	1.34036	0.676775	0.371993	0.487809		Shared	9
AC205534.3_FG002	4:143679438-143680820	1319	-	0	0	0	0	0.223621	1.77716	0.659072	0.618334		HS68	4
AC205567.3_FG002	1:81960076-81960861	579	+	0.446932	1.23151	0.941842	0.375325	0.269944	0.373115	1.92942	1.12835		HS68	3
AC205574.3_FG006	3:3475915-3479648	2761	+	6.80395	5.4246	3.68745	10.5544	7.72129	9.4785	4.65145	13.4274	TCP	Shared	8
AC205592.3_FG001	4:197923783-197925832	1134	+	1.19872	0.239085	0.667369	0.634797	0.956596	1.48708	0.425653	0.257585		Shared	5
AC205673.3_FG006	2:197006742-197014021	3180	-	1.73702	3.7971	0.383553	0.598832	1.5179	0.928516	2.20339	1.83919		Shared	13
AC205703.4_FG005	5:181192339-181197076	2523	+	4.50968	3.59673	9.18904	4.86096	3.97005	3.19526	6.02275	4.66627		SD609	9
AC205703.4_FG006	5:181197597-181200098	981	-	8.18375	15.8505	15.5482	19.475	8.75002	15.4688	11.7038	27.0188		Shared	8
AC205725.3_FG010	1:23580043-23586538	4476	+	8.20401	6.41202	7.09302	3.92705	10.9649	7.63445	7.53976	4.98575		Shared	16
AC205730.3_FG002	1:166324566-166341470	1836	+	3.07619	4.67598	2.79196	1.67034	2.62547	1.77219	3.36666	1.30962		Shared	13
AC205735.3_FG006	4:205308125-205309513	1389	-	1.42081	0.671465	0.486449	0.572476	1.20076	0.763469	1.06847	0.187002		Shared	6
AC205886.3_FG001	6:90807106-90815834	1011	+	0.271531	0.139908	0.428969	0.342269	0.804962	1.95623	0.0546572	0		HS68	11
AC205982.3_FG014	6:159183032-159183607	576	-	19.5482	16.9391	25.4052	16.8415	11.53	7.71278	16.35	8.53615		HS68	10
AC206201.3_FG004	1:294997951-295003799	1554	-	2184.36	1167.75	1424.06	1685.33	2626.72	892.909	2638.76	2269.98		SD609	3
AC206223.3_FG001	9:137411118-137413738	1465	-	4.43317	9.84144	4.82873	3.49454	6.3901	6.36082	15.3518	5.99648		Shared	13
AC206223.3_FG004	9:137250532-137257691	1842	-	0.663208	0.682659	1.30944	1.79788	0.667398	0.706488	0.346315	0.62908		SD609	6
AC206223.3_FG006	9:137336819-137339379	1785	+	5.15492	6.19071	7.24668	7.79959	6.72733	5.98657	4.80421	3.47702		HS68	9
AC206223.3_FG008	9:137350754-137354173	2916	-	0.0598895	0.246476	1.27696	0.805564	1.11528	0.875736	0.368547	0.30304		Shared	9
AC206223.3_FG010	9:137344168-137344612	321	-	96.6974	42.4234	65.4546	34.4917	64.8729	61.0354	77.634	59.3625		SD609	3
AC206266.3_FG001	9:17739670-17908271	5158	+	1.6116	9.89556	4.56633	9.59258	4.33711	8.0903	5.85823	7.82735		SD609	4
AC206425.3_FG002	3:131930841-131931803	845	-	0	58.6656	0	45.857	0.0781796	1.3437	0	0.315974		Shared	12
AC206547.2_FG002	10:27193235-27193723	489	-	1.19004	0.82113	0.940691	0.998966	2.68435	0.993157	3.06025	2.75187
AC206642.4_FG001	2:77605531-77607759	802	+	678.092	254.38	768.494	461.698	646.375	497.92	447.148	573.753		SD609	8
AC206764.4_FG001	3:690875-692941	2067	-	1.01239	0.197558	0.345428	0.260701	2.44513e-05	0.215144	0.605811	0.484042		Shared	6
AC206788.3_FG008	6:159772119-159772388	270	-	7.16274	11.9762	12.1869	2.53413	10.3684	20.3707	14.0575	16.558		SD609	2
AC206788.3_FG015	6:159888909-159890330	1422	+	1.84815	1.58612	2.37475	1.13747	2.43907	2.80731	1.49174	2.2654		SD609	11
AC206840.3_FG002	1:57349176-57349496	321	-	4.4994	6.4617	1.85184	2.18554	14.8416	10.4583	3.2169	8.89441		HS68	5
AC206901.3_FG005	10:130721588-130723152	834	-	3.93158	3.15325	2.20865	2.8629	1.90954	2.40798	2.67656	3.20157	MYB
AC206941.2_FG002	5:12291230-12291790	561	-	46.2009	886.746	30.6697	1325.91	47.1323	368.653	98.4156	197.095		Shared	12
AC206951.3_FG017	1:17526391-17527311	921	-	1.99071	2.84129	2.96365	6.27284	3.00095	2.4941	1.41872	1.64501	ERF	SD609	6
AC206980.3_FG007	2:5100809-5101384	576	+	0.150224	0.620945	0.474864	1.70307	0.952607	4.13857	0.48643	5.11996		Shared	8
AC206999.1_FG002	1:172727465-172731700	2170	-	11.6136	23.085	0.305098	0.374474	0.058899	0.0806814	2.48652	0.809754		Shared	13
AC207205.3_FG004	2:191471460-191492533	1039	-	0.917971	1.28374	0.466138	1.5704	1.3759	0.903719	0.686226	0.82883		SD609	4
AC207265.3_FG002	9:14833132-14841478	2356	+	7.17931	9.36159	8.33473	6.07885	4.86755	8.31303	9.50621	4.58851		HS68	6
AC207309.3_FG007	9:125895435-125896370	936	+	2.02879	2.75817	2.25038	1.51187	1.2985	1.5654	2.03026	0.947481
AC207328.3_FG003	4:127209793-127210332	540	-	0.667947	1.89916	0.659875	0.841266	1.05743	0.627252	0.405977	0.632191
AC207342.3_FG008	8:136412703-136416457	2733	+	12.8423	12.4889	25.0836	15.7788	22.4348	23.4348	21.628	7.51759		Shared	15
AC207454.3_FG004	9:133322469-133323014	546	-	0.819689	0.847405	0	0.206482	14.5374	22.7851	0.132828	0.206893		HS68	11
AC207628.4_FG005	3:202940170-202943629	1838	+	0.832475	0.287971	2.41435	0.355149	0.871071	0.493368	0.707651	0.777636		SD609	11
AC207628.4_FG009	3:202827010-202833690	2777	-	6.46329	8.3195	3.7508	8.42187	4.37136	9.02244	4.55916	8.8858
AC207628.4_FG010	3:202837296-202838194	828	-	3.35262	1.54667	6.96988	3.78055	0.96408	1.87898	4.97924	2.34112		Shared	14
AC207628.4_FG011	3:202844173-202857236	2443	+	15.8044	7.17026	13.3441	8.92128	9.35997	8.71422	11.1318	4.90573		Shared	7
AC207652.3_FG001	3:38166788-38180088	4058	-	4.78839	7.69369	3.29901	4.84255	5.37904	5.22161	5.12603	4.95027		SD609	5
AC207722.2_FG009	7:147057396-147058184	789	-	3.95835	0.874868	19.2098	0.237546	2.23023	0.118065	1.97639	0.238153		Shared	14
AC207728.2_FG003	6:126342288-126449383	3063	-	1.57419	0.995107	1.77814	2.9379	1.4677	2.71841	1.15353	1.79371		Shared	5
AC207755.3_FG005	10:6163581-6165882	1127	-	1.7034	2.17986	9.76614	2.54441	5.26348	5.74052	4.46205	2.66301		Shared	15
AC207803.3_FG003	UNKNOWN:5632196-5650483	4405	+	37.3974	41.3128	22.5024	49.32	38.8148	59.3244	34.8986	47.9794
AC207890.3_FG002	4:94431219-94439333	3947	+	244.719	185.448	82.3649	265.294	236.719	358.815	173.722	350.531		SD609	12
AC208031.3_FG002	7:129866108-129867049	594	+	0.572176	0.591111	0.226075	0.540591	0.12966	0.716539	0	2.16703		HS68	2
AC208110.2_FG006	10:140736174-140741028	3666	+	0.765459	1.46241	1.06091	0.827392	0.658368	0.900683	1.19087	1.26481		Shared	13
AC208110.2_FG007	10:140741826-140743194	369	-	148.184	116.584	131.309	60.832	55.0588	35.13	64.5028	33.72		Shared	7
AC208113.3_FG005	1:262997973-262999127	1155	+	1.12376	1.92448	0	0.293197	0.752226	0	0.657879	0.512836		Shared	13
AC208113.3_FG009	1:263047262-263048970	1518	+	0.715372	1.71172	1.82835	1.51905	1.45894	1.17065	5.12617	8.84816		SD609	1
AC208126.3_FG001	4:235746306-235746728	306	-	6.68629	151.796	68.3792	106.323	32.8829	49.3147	89.2815	12.1862		Shared	13
AC208201.3_FG003	1:45337864-45341089	2264	+	0.157977	0.191178	2.12043	0.232343	0.843325	0.139624	2.08003	0.166478		Shared	10
AC208204.3_FG006	1:38637065-38637541	477	+	975.704	253.078	161.576	196.994	193.073	129.355	197.276	226.365		SD609	7
AC208221.3_FG002	2:37901719-37904325	744	+	15.5496	51.8212	10.3453	10.442	5.95488	4.61327	0.165108	0.129235		Shared	13
AC208327.4_FG002	8:126449851-126452292	570	+	1.06946	0.789436	3.50139	1.73201	1.93722	3.25234	0.247395	0		Shared	15
AC208337.2_FG003	7:10786267-10792717	4263	-	1.8995	3.33821	1.53478	10.0338	2.835	1.53759	0.261517	0.491543		Shared	3
AC208341.4_FG006	8:96350079-96361126	1054	-	0.844188	1.72513	1.34748	1.87825	1.2917	0.729546	0.716873	0.858711		SD609	4
AC208348.3_FG012	5:216695478-216697052	1575	+	1.5476	2.00188	0.971549	1.65104	2.46721	2.18808	2.0411	1.95707
AC208436.3_FG007	1:45098844-45109608	4330	+	0.553937	2.23562	1.20412	1.93525	1.24868	1.51353	1.4649	1.07955		SD609	4
AC208521.3_FG002	6:55385154-55395304	2628	+	7.83037	7.80858	14.9388	10.0357	7.51914	7.76207	8.71308	7.17072		SD609	9
AC208539.3_FG002	5:202930664-202931464	801	+	0	0.704846	0	0	0	1.03244	0.586609	0		Shared	1
AC208559.3_FG003	4:125108205-125110893	912	-	0.853134	0.719551	0.980266	0.586529	0.848254	1.2632	0	0		HS68	11
AC208571.4_FG001	1:50628458-50712412	3856	+	7.7029	7.78166	9.7669	5.49478	11.24	8.55886	9.8322	6.11654		SD609	11
AC208577.3_FG005	5:174941523-174942072	495	+	4.6573	2.81144	0	0	0	0	0	0		SD609	7
AC208724.3_FG001	4:230214450-230217325	798	+	0.278356	0.0956961	0.36864	0.584667	1.21199	0.949671	0.299318	0.353626		HS68	9
AC208855.3_FG002	10:39915791-39916033	243	+	0	30.9013	0	4.96184	0	0	0	0		SD609	5
AC208860.3_FG002	9:140716307-140719269	861	+	0.0837033	0.0863029	1.78534	1.47694	0.457498	0.734052	0.0674649	0.634644		SD609	9
AC208892.3_FG005	2:216320371-216325621	3892	+	0.681192	0.573835	5.50488	3.46531	1.09222	0.911188	1.51762	0.575731		Shared	4
AC208897.3_FG004	1:27121864-27127600	1790	-	0.376827	0.670008	0.189384	1.07983	0.626729	0.482712	0.440364	1.26659		Shared	8
AC208930.3_FG007	3:129214698-129217288	672	-	1.65902	1.46788	0.655417	0.447931	0.107635	0.5937	0	0.448988
AC209080.3_FG004	3:179374734-179380428	1023	-	0.601844	0.895829	4.01448	3.70891	2.19611	4.44072	0.376877	1.8596		Shared	4
AC209206.3_FG014	10:137458157-137460710	1641	-	29.0088	16.6978	131.422	20.9396	78.446	54.6297	110.59	9.25301		Shared	10
AC209208.3_FG002	5:193306271-193309603	1212	+	254.861	177.794	322.076	188.973	153.772	106.436	214.077	63.6458		Shared	7
AC209257.4_FG003	6:153224357-153228531	3851	+	0.201914	0.109087	1.07227	0.711039	0.416714	0.650023	0.466686	1.327		Shared	4
AC209257.4_FG006	6:153233970-153236020	618	+	0.537898	2.77771	2.444	1.1859	0.73188	2.02096	0.869971	1.52812	ERF	SD609	10
AC209257.4_FG008	6:153242562-153243215	654	+	7.90981	5.61329	5.99796	3.16839	6.02559	5.31511	2.85534	1.1586		Shared	9
AC209356.4_FG001	4:235888891-235889255	267	+	0	0	55.1498	0	3.64724	0	8.41896	0		Shared	14
AC209364.3_FG009	3:225759509-225760204	696	-	1.46327	1.85866	3.20159	0.850982	1.94348	1.1279	1.36341	1.70606		SD609	1
AC209377.3_FG003	3:137530090-137530581	492	-	0.392348	1.42118	1.86081	0.494036	0.354067	0.24558	2.07069	1.23723		HS68	3
AC209624.2_FG001	2:83169346-83192383	3563	+	1.2104	1.54147	2.88851	0.839397	0.844737	1.54045	4.39025	0.126187		Shared	10
AC209626.2_FG013	1:17884404-17885816	707	+	34.5472	24.5157	19.5541	29.7991	27.7784	20.2555	28.4497	50.0672		HS68	2
AC209664.3_FG002	9:4651553-4654530	1506	+	14.5069	6.97333	16.7405	7.43203	13.3	6.65367	15.2901	9.19876		Shared	16
AC209784.3_FG007	3:181108343-181111529	1947	-	17.5359	29.7825	16.2843	18.9692	10.0888	4.52815	8.85676	3.66364		HS68	1
AC209810.3_FG002	3:165445683-165446789	1107	-	0	1.68453	0.0956657	3.81691	0.165817	0.531154	0.0974717	0.153108		SD609	4
AC209835.4_FG004	5:21881950-21887355	1521	-	55.2145	162.475	58.3326	295.517	174.129	410.604	36.3747	129.848		Shared	5
AC209858.4_FG004	1:11301152-11301835	684	-	84.76	22.2617	27.1602	24.3529	71.2075	31.877	18.1403	12.1035		Shared	6
AC209860.3_FG001	8:107388234-107445039	968	-	0.143543	0	4.04122	2.93644	3.00514	3.11714	2.39248	2.44927		SD609	9
AC209987.4_FG002	5:46779185-46781573	1560	+	7.18243	1.69378	1.71129	0.556492	1.32071	0.653698	2.32196	1.72521		Shared	6
AC209987.4_FG010	5:46946530-46947446	810	-	3.75002	3.86878	1.88402	7.21775	10.5372	18.297	2.7123	13.439		Shared	5
AC210003.2_FG004	2:4211269-4213827	999	+	9.73156	167.929	38.8895	119.122	19.8064	48.5047	35.9638	31.1778		Shared	12
AC210013.4_FG002	5:3486679-3487513	618	-	1.88264	0.416656	1.06261	1.01648	2.68356	2.02096	1.52245	4.24479		Shared	8
AC210013.4_FG003	5:3477935-3482824	1527	+	0.866351	8.57528	0.91387	7.24015	0.377391	1.02027	1.19504	10.9153		Shared	12
AC210013.4_FG008	5:3334455-3343991	2201	+	10.8494	11.377	16.0937	14.1073	14.1763	11.8819	12.3364	7.78545
AC210013.4_FG013	5:3403261-3407900	2351	+	2.26789	2.0453	0.936207	1.12585	1.05807	1.07079	1.31212	1.0716		SD609	2
AC210013.4_FG014	5:3408128-3412385	2099	-	3.86627	6.57322	2.62294	6.49833	4.89072	8.50428	4.4778	5.77412		SD609	4
AC210013.4_FG016	5:3422248-3423706	493	-	154.028	81.1666	106.171	142.51	126.936	182.797	82.3687	142.147		SD609	3
AC210013.4_FG017	5:3425592-3427250	1464	+	0.0864306	0.0444976	1.39939	0.0544846	0.158005	0.37909	0.0347399	0		Shared	4
AC210013.4_FG018	5:3428065-3429766	1194	-	16.1935	17.2657	8.15414	27.2425	5.26326	6.87071	14.1809	33.7891		Shared	8
AC210013.4_FG019	5:3430827-3432408	825	-	268.263	98.3002	342.063	227.082	322.467	258.405	249.358	242.221		SD609	8
AC210168.4_FG003	3:126509251-126510797	561	-	0.627126	4.37519	3.84098	6.51684	0.851698	0	2.41244	1.97885		Shared	3
AC210193.4_FG002	3:196560796-196561635	840	-	23.1891	7.85155	37.6635	21.265	16.9426	9.21395	8.23088	2.95208		Shared	4
AC210204.3_FG002	2:164667540-164668535	996	-	22.6804	32.5576	23.8864	30.1223	44.093	45.6042	46.3032	58.5444
AC210303.3_FG001	6:143663397-143696798	3138	+	13.161	11.5376	10.2404	6.68185	9.54059	8.45434	12.2564	14.3724
AC210314.3_FG006	9:140888689-140891724	625	-	84.0238	107.527	112.249	110.654	60.0718	41.4668	92.3265	70.699		HS68	3
AC210517.3_FG003	1:122036981-122037743	666	+	0.120086	3.71898	16.0354	4.08524	10.3607	8.8741	8.53774	0.454981		Shared	15
AC210595.3_FG004	9:42521681-42524596	933	+	11.9751	14.9801	29.3515	19.9312	20.6411	11.5818	6.38696	3.723		Shared	4
AC210616.4_FG005	4:124279636-124280961	1326	+	0	1.95178	0	2.87941	0	0.121789	0.039078	0.0614433	EIL	SD609	4
AC210669.3_FG001	8:53326211-53327094	834	+	26.3853	9.36966	34.3031	16.1864	37.7929	44.5476	14.5098	56.9658		Shared	8
AC210816.3_FG006	1:156156652-156156915	264	-	5.77097	6.16595	14.6757	4.2768	22.1986	15.7788	2.99979	5.73593		HS68	9
AC211152.4_FG007	9:17470186-17472243	1731	-	0.0711843	0	1.23682	1.34629	0	0	0	0.225062		SD609	6
AC211175.3_FG005	3:199852870-199857612	3115	-	12.6526	7.48901	8.0085	10.0833	8.64615	8.36014	11.0132	24.4033		HS68	2
AC211192.3_FG003	3:160874397-160877158	877	-	0.317637	0	1.85514	2.06242	0	0	0.485487	1.33857		Shared	4
AC211276.4_FG008	5:16416400-16417482	1083	+	25.3451	11.0841	10.8077	11.8183	12.5851	11.9329	14.2906	13.1689		SD609	7
AC211327.4_FG005	5:52504786-52508987	2797	+	11.0136	23.3396	16.1136	17.4042	13.599	12.9698	14.0739	13.2358		SD609	10
AC211349.4_FG001	8:175624463-175630584	1354	+	25.3402	14.1955	5.2693	12.8501	22.5862	23.5211	16.9982	27.9885		SD609	7
AC211401.4_FG003	1:271184909-271186141	1233	+	2.57441	3.96107	0.263725	0.466092	1.76303	2.78137	2.04012	1.52576		Shared	1
AC211467.4_FG002	1:126116229-126116642	414	+	2.73998	2.27444	7.58364	8.27418	7.37023	4.45668	6.70844	11.3907		Shared	4
AC211471.3_FG002	7:171588682-171589260	579	+	2.08568	0.153938	0.11773	0	0	0	1.92942	1.31641		Shared	11
AC211478.3_FG004	3:141496250-141496714	465	+	0.652693	0.225324	4.81588	3.01294	0.195989	0	0.5307	1.64599	NAC	Shared	4
AC211504.4_FG003	7:169585017-169588026	1560	+	0.120376	0.123935	0.0316905	0.151771	0.917161	1.50853	0	0		HS68	11
AC211737.3_FG012	5:193157226-193205171	4655	+	13.4414	18.7185	30.8844	16.6066	19.8754	16.9005	23.2155	9.87161		Shared	14
AC211749.4_FG007	3:114873865-114874161	297	+	2.02957	0.711506	1.07229	0	2.3482	7.59583	3.40341	0		HS68	4
AC211972.4_FG003	7:115880368-115882492	609	-	5.91529	5.68367	0.326114	3.29275	1.24751	1.03368	3.56057	7.46845		Shared	11
AC212023.4_FG004	1:224769787-224770446	660	+	0.608571	0.251306	4.61622	0.460063	0.221047	0.304891	0.590072	0.153712		SD609	9
AC212023.4_FG006	1:224774153-224779152	4332	+	1.10683	1.07076	0.707134	0.57189	0.896354	0.354557	0.79317	0.523545		HS68	10
AC212035.3_FG008	3:57007940-57012607	744	-	15.356	28.8538	7.65026	7.16209	9.63433	3.21576	0.788166	0.494698		Shared	1
AC212068.4_FG005	6:145180923-145190794	1184	+	5.20616	6.40084	49.3561	8.67715	8.23632	7.45474	24.2968	4.16301		Shared	14
AC212186.3_FG011	1:256559388-256559828	441	+	3.85464	4.74412	0	0	1.94943	0.904492	0	0		Shared	1
AC212227.3_FG006	4:31126231-31128537	1883	+	7.63451	6.10462	1.55848	12.7584	9.61545	13.9526	4.26955	14.0567		Shared	8
AC212323.4_FG010	1:179988249-179988764	516	+	0	0.559909	0.570373	1.59038	0	1.12934	0	3.6419		Shared	8
AC212351.4_FG001	5:124554678-124555115	438	+	0.732572	1.26562	0.965365	0.922071	0	0.61118	4.77354	1.53886		HS68	3
AC212394.4_FG010	6:153219446-153224093	1299	+	0.0498077	0	1.33755	1.38144	0	0	0	0		SD609	6
AC212565.3_FG001	8:16166029-16166694	666	-	238.251	64.0903	281.044	136.629	187.147	199.742	198.406	137.404		SD609	8
AC212684.3_FG012	7:172363672-172365936	2265	-	0.920852	1.19132	1.57912	0.464459	1.39683	1.12113	1.75354	0.931802		Shared	10
AC212809.2_FG002	1:89978853-89979404	552	-	1.60998	1.99711	0	0	1.7486	0.604783	2.86927	0.812773		Shared	11
AC212835.3_FG001	2:20855940-20857589	1650	-	0.376045	0.464558	1.69286	1.13791	1.06606	1.46092	0.815901	0.998672		SD609	9
AC212835.3_FG004	2:20959100-20959561	462	+	11.2319	2.28109	15.7808	1.38629	8.03315	10.1992	2.68654	1.38844		Shared	9
AC212898.2_FG006	3:214716886-214726066	2063	-	3.0679	2.86713	3.15209	2.12687	1.42291	3.07194	4.59765	4.36795		HS68	8
AC213050.3_FG001	6:94852018-94855506	2223	+	2.03975	14.1702	0.513248	1.5351	2.14886	1.69428	2.49175	1.67354		SD609	5
AC213050.3_FG002	6:94990458-94992584	738	+	1.93883	5.29425	2.57157e-05	0.39117	2.44246e-05	1.40146	1.07015	0		Shared	13
AC213353.3_FG004	3:18329937-18330650	714	+	0.869683	1.41098	5.30521	9.84795	0.451173	0.466821	0.525534	1.7258		SD609	6
AC213398.3_FG007	3:138331591-138333877	720	+	0.214348	0	1.62459	1.62923	0	0	0	0.277275		SD609	6
AC213432.2_FG004	4:186273392-186273949	558	+	1.73978	8.82786	9.37461	10.5585	1.14547	4.35703	2.30581	3.39359		Shared	12
AC213463.3_FG004	5:13142401-13143429	1029	-	1.39392	1.09439	2.25455	1.84075	1.02943	0.748513	1.49631	1.51026		SD609	9
AC213463.3_FG006	5:13038606-13045364	2738	+	1.06355	1.10498	1.51775	1.97942	1.80441	1.33077	0.618191	1.00499		Shared	4
AC213463.3_FG007	5:13047997-13050849	737	+	11.3009	9.09236	15.2356	11.889	16.8365	17.6625	21.9224	12.9732		HS68	6
AC213600.3_FG002	3:44315974-44340763	2259	-	33.8341	37.55	16.9813	11.0715	33.9064	24.5544	51.286	29.5483		Shared	11
AC213612.3_FG002	9:43478354-43497760	1740	+	8.87718	6.89953	9.95028	15.1502	20.3239	30.2491	21.3711	11.6428		Shared	5
AC213621.5_FG002	6:151570020-151579404	2554	+	1.21707	1.95654	0.565022	0.622849	1.00248	0.744348	1.40327	1.47779		Shared	13
AC213621.5_FG004	6:151580017-151581309	1293	+	5.70976	4.79727	3.28341	2.90457	3.66038	2.51049	2.33629	2.5964		SD609	2
AC213654.3_FG001	3:187930046-187931023	978	-	20.7468	19.6647	5.61897	12.1382	14.2931	13.6151	18.2458	13.2335		SD609	12
AC213654.3_FG003	3:187901801-187902343	543	+	9.92689	7.6973	10.0684	7.71012	1.34719	4.35036	7.50766	6.89021		HS68	8
AC213654.3_FG005	3:188020998-188024443	1783	+	18.9785	19.3417	7.60468	20.1451	18.3396	23.6612	12.0568	22.0755
AC213884.3_FG002	6:140546904-140548013	1110	+	0.301769	1.30578	1.28714	0.532572	0.771225	0.529369	2.38	0.457781	MYB	Shared	10
AC213896.2_FG005	9:9398191-9400228	573	+	0	0	0	0	1.23498	2.08672	0	0		HS68	11
AC214139.3_FG008	10:18395498-18397399	755	+	0.801654	1.63017	0.633344	0.378835	1.64086	1.63184	0	0.126595		Shared	1
AC214147.3_FG002	4:202340478-202360579	525	-	0	1.63007	1.10733	2.86724	0.949916	0	1.562	0.66293		Shared	3
AC214168.3_FG001	2:55669433-55679262	1706	+	0.865782	1.70155	0.636872	2.01091	1.29287	1.51547	1.81302	2.14273	E2F/DP	SD609	4
AC214267.3_FG004	1:239431989-239437692	4290	-	0.608495	0.816428	1.21172	1.05095	0.436388	0.878759	1.00825	0.820031		Shared	14
AC214448.3_FG007	3:181790295-181791647	1353	+	7.96182	13.0916	2.67085	3.87959	3.91479	15.2975	14.5197	8.47539		Shared	1
AC214451.3_FG005	6:148251186-148302676	2233	+	0.374189	1.15007	0.377358	0.202213	0.831801	0.703457	0.633247	1.0142		SD609	5
AC214524.3_FG002	1:77966985-77969035	1593	-	0.0391627	0	1.48465	0.049377	0	0	0.0629477	0		SD609	9
AC214534.3_FG010	3:162598821-162604893	1777	+	28.7179	11.3439	59.6752	17.2204	24.9693	14.5162	27.6363	9.55803		Shared	7
AC214602.3_FG012	2:232499093-232518488	5965	-	1.77067	3.30207	9.85102	10.1869	2.90349	2.62521	6.6133	4.16168		SD609	6
AC214635.3_FG002	4:124358348-124359718	1371	+	2.86815	2.93249	1.51281	1.73869	1.15381	1.23048	3.62204	4.18752		HS68	8
AC214635.3_FG006	4:124478317-124478574	258	-	2.64381	2.83888	2.10405	8.14195	22.9479	39.3593	9.26564	52.4478		HS68	7
AC214648.3_FG001	8:131903551-131905086	1536	+	0.204278	0	1.1939	0	0.0747038	0.0511994	6.00935	0		Shared	10
AC214753.2_FG002	4:84717202-84725075	1452	+	1.30906	1.30299	0.792657	0.990252	0.438723	0.546819	0.806806	1.04836
AC214817.3_FG004	6:154319348-154325405	3431	-	8.33614	6.41345	12.4065	11.6283	13.7756	17.1366	14.5432	13.7581		SD609	6
AC215201.3_FG005	6:142082146-142086655	2184	+	27.8606	7.46165	8.97811	21.0838	66.3881	41.0206	51.124	35.0906		Shared	5
AC215201.3_FG008	6:142096397-142097955	605	-	0.927965	11.7207	6.02637	9.83587	19.3969	11.8671	13.4145	7.09503		Shared	5
AC215260.3_FG001	3:17116070-17116597	528	+	63.6517	83.0433	149.827	126.471	127.959	97.0669	59.0575	70.4692		Shared	4
AC215260.3_FG003	3:17019962-17021399	1377	+	0	0	0.115341	1.35025	0.044468	0	0	0		SD609	6
AC215260.3_FG004	3:17033772-17034278	507	+	28.0881	35.9872	7.49842	22.7217	10.4164	21.4247	17.0555	34.027		Shared	11
AC215607.3_FG004	9:53951677-53952523	462	-	4.84512	4.10593	0	0	1.98348	0.275653	0.358202	0		Shared	6
AC215639.3_FG002	10:52222799-52226691	1116	-	0.359705	0.0617641	0.236768	0.302296	0.656658	1.65263	0.144737	2.12206		HS68	7
AC216229.3_FG002	10:127978924-127983831	4580	+	10.3542	11.2946	11.1297	12.9341	7.57834	2.62391	0.590247	1.28029		HS68	5
AC216247.3_FG005	1:63573591-63614571	2925	+	64.1081	60.4178	29.4863	76.6411	52.1672	83.0839	34.5365	99.6022
AC216264.3_FG001	5:45906106-45909413	1844	-	0.165622	5.66765	0.32207	5.90381	0.48467	2.32656	0.671296	0.957476		Shared	12
AC216353.2_FG005	5:210593958-210594236	192	-	2656.31	1158.23	3782.6	1684.22	2427.77	779.035	1803.73	1202.09		Shared	7
AC216867.3_FG003	8:40013321-40014781	649	+	9.86048	3.73719	8.67889	2.6734	1.69966	4.68982	3.02617	4.88627		Shared	7
AC216870.3_FG005	6:105367496-105373307	2464	-	3.10561	4.29131	2.08118	1.61828	4.39481	5.57699	4.35778	4.02309		SD609	2
AC216886.3_FG002	9:33712928-33714367	1323	-	0.292359	0.401453	2.19367	0.675733	0.222591	0.366359	1.09716	0.431269		Shared	14
AC217050.4_FG006	1:214899242-214902515	1240	-	647.739	261.312	730.237	381.335	453.262	378.198	528.874	479.652		SD609	8
AC217252.3_FG005	3:22913473-22914573	531	+	0.171779	0.177634	0.135766	0	0	0	1.81029	0		HS68	6
AC217264.3_FG005	1:246031095-246033561	1365	+	10.3745	2.85219	4.18966	5.5632	6.86328	6.82381	6.68103	9.14095	MYB	SD609	3
AC217293.3_FG007	2:231712004-231718266	2196	-	0.975483	0.199382	9.52714	1.13901	0.983344	0.343056	5.77326	0.24107		Shared	14
AC217300.3_FG004	1:43392179-43398343	1685	-	7.2399	1.0203	1.8844	3.70353	3.65929	3.03618	3.00861	5.19931		SD609	3
AC217300.3_FG005	1:43420855-43421523	669	-	8.35021	1.97023	4.0529	7.66536	8.8841	8.21756	7.90236	9.79256		SD609	3
AC217358.3_FG005	1:296891075-296893859	1205	-	222.763	103.243	225.472	136.513	193.171	190.48	221.494	170.403		SD609	8
AC217358.3_FG007	1:296960908-296962228	1093	-	0.556337	58.083	0.45389	73.0897	0.435696	14.8125	0.5588	6.41849		Shared	12
AC217358.3_FG011	1:296992257-296996828	1244	-	114.379	139.347	60.5615	153.734	95.014	91.8338	74.035	137.075		SD609	4
AC217401.3_FG001	1:264850967-264854301	1834	-	3.4273	3.11408	14.8531	4.32141	5.0031	4.5908	14.6301	3.4203		Shared	10
AC217499.3_FG003	3:221179962-221183705	1764	-	5.15416	6.90961	2.66846	3.1183	3.91895	3.74708	3.00576	3.5392
AC217553.3_FG001	2:107317220-107452896	3545	-	4.03625	9.40931	4.11112	11.2405	5.29072	4.86799	4.0721	6.85576		SD609	4
AC217811.3_FG002	4:112611022-112625497	1915	+	2.66854	1.83255	3.83438	1.42327	4.42403	2.25943	3.61623	1.83701		Shared	16
AC217965.2_FG012	8:15106418-15107209	792	-	4.50021	1.25708	3.92559	1.89046	3.07202	2.46642	3.55393	3.07985		SD609	3
AC217975.3_FG001	7:168592444-168595271	1095	-	2.27126	4.93311	2.52133	2.0893	0.560242	0.230749	3.31013	1.0088		Shared	13
AC217977.3_FG001	1:220523997-220524734	738	-	0.310436	1.17439	0.408773	0.130398	0.0941081	0.259244	0.250535	0.130722		SD609	5
AC218035.3_FG004	8:103590036-103593771	762	+	55.1967	42.6538	18.9904	28.5463	52.5573	39.2807	36.1529	28.6182		Shared	6
AC218093.3_FG005	2:25766747-25772332	4088	+	12.236	14.0385	0.240546	0.170711	0	0	0.154637	0.24148		Shared	13
AC218148.2_FG008	6:159379789-159382275	2487	+	10.6989	5.34975	10.5501	6.0457	12.4003	9.32495	13.2537	8.18394		Shared	16
AC218972.3_FG007	8:170746071-170748746	729	-	0.947692	0.977827	0.915128	1.45959	1.24474	1.97851	0.934899	0.399052		HS68	11
AC218998.2_FG007	4:6050914-6074478	5305	+	26.0003	33.0423	21.6446	33.0293	17.5795	20.9184	28.9745	38.5215
AC219006.2_FG006	8:131966954-131969237	2013	+	6.27855	5.19072	6.68668	11.7454	4.06341	3.90763	6.1137	6.78228
AC219006.2_FG007	8:131970482-131980645	1397	+	0.822057	1.03468	1.11824	0.518203	1.25212	0.515076	0.917977	0.578026		HS68	1
AC219156.3_FG002	8:28468206-28479792	4114	+	2.05302	2.99423	2.13052	3.98128	1.72366	2.90922	2.46928	1.67328		Shared	12
AC219190.3_FG002	9:100132238-100135556	1076	-	0.371716	0.452543	1.68519	2.46383	2.17613	1.41512	0.404024	5.54344		Shared	8
AC220927.3_FG007	5:208675421-208676365	945	+	13.9195	11.2946	16.4933	21.2779	17.753	30.5195	15.3868	31.7228
AC220970.4_FG002	5:534150-536232	1711	-	0	0	0.455778	0	0.39587	0.0904078	2.70883	0		Shared	10
AC220972.3_FG001	3:55475631-55476395	765	+	1.08215	0.405927	2.02076	0.495897	1.70062	1.35559	1.42862	0.621434		SD609	11
AC225147.4_FG002	1:292879898-292882101	429	-	266.287	90.5455	236.925	129.12	215.824	158.326	185.711	192.163		SD609	3
AC225179.3_FG003	3:81075088-81075801	615	-	1.62587	3.77832	1.60595	2.04829	0.49156	1.52714	1.20531	1.19749		SD609	5
AC225193.3_FG004	9:113061158-113065338	1535	+	5.06742	5.47507	2.8212	6.56199	3.11203	3.18167	3.91084	4.66183		SD609	4
AC225205.3_FG003	7:130092349-130094061	1355	-	12.8215	14.0474	8.15753	7.09203	14.4525	6.92362	12.0181	4.01198		Shared	1
AC225346.3_FG001	8:128343673-128344143	471	+	0	2.63946	2.68675	2.13948	0.574301	1.06354	1.03594	0		SD609	10
AC225354.2_FG004	10:100479866-100480855	507	+	14.5091	5.38846	12.0563	17.5683	8.73635	14.4384	3.47146	7.04007		Shared	3
AC225555.3_FG005	7:102399264-102416056	7061	-	3.64962	3.26437	2.94836	7.83858	3.86846	4.86422	3.35733	2.08095		Shared	3
AC225718.2_FG006	5:48501784-48502182	399	+	7.41568	5.54433	9.61858	6.71575	8.22952	30.0572	10.6676	12.3269		HS68	4
AC226221.2_FG011	5:136314239-136314853	615	+	7.4519	3.91826	4.17547	2.73105	5.89872	5.26016	4.16381	7.52707		SD609	3
AC226227.2_FG005	10:128989498-128991126	1629	-	1.56472	1.72875	0.843952	2.79085	1.91944	2.48702	1.10409	1.73746		SD609	4
AC226235.2_FG001	3:30996380-30997528	930	+	2.26796	14.5721	7.04678	4.85964	11.5086	15.8176	10.2313	6.5926		Shared	5
AC226235.2_FG002	3:30947720-30948670	951	+	47.6515	22.7988	42.5818	33.9136	40.967	40.7164	37.749	39.8758		SD609	3
AC226235.2_FG003	3:30922231-30923358	1128	+	0.118322	1.21897	2.05609	2.90856	1.45811	4.37367	3.61818	1.72018		Shared	15
AC226368.2_FG006	1:63039646-63041286	1641	-	1.88854	1.91465	1.64495	1.96085	2.02658	2.42816	2.77464	0.897536		HS68	1
AC226552.2_FG001	4:228264257-228347571	420	-	3.33894	8.12714	7.70502	7.22114	4.47243	4.06249	2.31743	4.48006		SD609	10
AC229978.2_FG002	2:176341765-176348710	3605	-	37.2032	44.9767	16.9448	31.9259	29.9415	30.8918	25.3357	51.3699		SD609	2
AC229993.1_FG009	3:208939428-208942847	1904	-	1.50253	2.30449	0.108704	0	0	0	0.692697	0.220051		Shared	13
AC230011.2_FG002	3:113896010-113902468	5565	-	0.96097	1.7122	0.719443	0.812829	2.06596	3.46894	1.28186	1.31223		Shared	5
AC230013.2_FG002	3:210670732-210673561	1119	-	2.86807	11.8192	5.38035	8.51146	2.61794	3.96809	3.4621	2.19055		SD609	5
AC231180.2_FG006	8:76127949-76130281	2046	+	20.3082	13.8524	32.216	14.3559	32.4204	13.8487	20.0289	16.8072		Shared	16
AC231411.1_FG011	6:165625344-165626546	1203	+	9.40136	4.7857	2.89256	1.24031	6.18928	8.15045	2.33052	1.93492		Shared	6
AC231745.1_FG003	9:18329545-18332502	2050	-	33.1541	57.9542	35.5582	43.0337	74.2966	77.4924	52.2827	72.0965		SD609	5
AC231745.1_FG004	9:18237646-18246380	3153	+	7.20957	8.71713	12.2755	11.9273	6.60857	8.27964	12.5184	21.9908		Shared	8
AC232238.2_FG004	8:166791835-166800381	2920	+	0.0206499	0.488044	0.277349	1.04239	0.266696	0.558676	0.148412	0.525383	bZIP	Shared	3
AC232238.2_FG005	8:166786843-166787289	447	-	2.3462	2.67438	0.556487	2.95334	0.422107	0.587263	0.763926	3.2533		Shared	3
AC232238.2_FG008	8:166713976-166743525	1125	-	1.18713	1.16186	0.281303	0.823074	0.487635	0.371874	0.955311	1.12556		Shared	11
AC232321.1_FG008	4:94943518-94946224	2589	+	0.172803	0.633807	2.70356	0.423703	0.490428	0.842655	1.21584	0.347057		Shared	14
AC232393.1_FG009	5:215835900-215842293	3623	+	3.09099	2.8767	2.64973	2.43804	2.89552	2.2502	5.53023	2.1412		HS68	6
AC233751.1_FG002	4:44779518-44784756	2978	-	0.455726	0.456727	0.903176	0.716622	1.09841	0.969156	0.685293	0.263801	SBP	Shared	15
AC233850.1_FG001	5:169814926-169815378	453	+	0.96073	4.24663	0.767853	4.13794	1.60226	2.15773	0.856319	2.1255		SD609	4
AC233850.1_FG002	5:169817842-169820658	546	+	37.7208	12.3094	34.2396	134.98	124.679	91.4007	73.3569	213.228		Shared	8
AC233851.1_FG009	3:189459229-189459540	312	+	0.569313	4.17617	4.50927	7.11904	5.97955	5.68637	5.21277	6.42418		SD609	6
AC233851.1_FG014	3:189496090-189497271	1182	-	1.52413	1.1187	0	0.00104929	0.725932	1.20032	1.64593	0		Shared	6
AC233853.1_FG002	3:3820868-3822095	867	+	3.23428	1.02604	2.75153	1.67235	2.56871	1.35066	3.00773	2.72476	bZIP	Shared	16
AC233861.1_FG001	2:189087675-189091070	3294	+	0.157594	4.57573	0.497803	4.48252	0.465169	1.05347	0.421585	0.753151		Shared	12
AC233863.1_FG001	9:97981732-97982091	360	+	0.755473	0.786613	8.06977	1.89725	5.37297	21.7244	7.13936	7.60098		Shared	15
AC233865.1_FG001	7:146607683-146607994	312	-	184.479	49.0223	297.455	101.722	172.071	130.634	165.756	108.736		SD609	8
AC233865.1_FG003	7:146597172-146598863	738	+	0.206958	0.320288	0.327018	0.260796	1.2234	1.03698	0.250535	0	NAC	HS68	9
AC233866.1_FG006	6:137412104-137414925	1733	-	694.142	193.713	777.124	348.441	683.375	449.527	536.943	446.75		SD609	8
AC233870.1_FG003	6:167033507-167036967	2623	-	12.3084	21.3845	7.94804	13.6707	9.56789	20.4665	13.5985	21.9928		Shared	8
AC233870.1_FG004	6:167030392-167033426	2321	+	3.58416	6.64297	2.01052	1.45509	7.78183	5.56448	5.22458	4.17863		Shared	1
AC233872.1_FG003	3:18219856-18221974	795	+	147.255	68.2982	95.1982	67.4681	144.052	116.722	115.603	90.6201		SD609	3
AC233879.1_FG002	6:140347606-140348577	826	-	8.52177	2936.61	0.559424	2728.83	1.34626	49.816	0.78522	13.8615		Shared	12
AC233880.1_FG009	3:1265318-1267574	783	-	0	0.0982419	0.677222	0.60016	1.8203	2.50564	0	0.120338		Shared	15
AC233882.1_FG003	3:205840855-205851145	4980	-	3.05192	1.69377	6.18606	2.85975	1.3302	1.04704	2.31149	1.22613		Shared	14
AC233883.1_FG006	4:193154840-193156459	1620	+	11.4842	6.80127	16.8054	6.73132	12.925	12.3223	15.9271	9.81161		Shared	16
AC233887.1_FG005	2:55445804-55448545	1857	+	0.525712	16.2111	5.76949	17.7975	0.961978	2.95374	13.6652	2.27779		Shared	12
AC233887.1_FG006	2:55449883-55455338	3100	-	35.6324	18.5827	11.1015	23.0172	27.9123	23.3924	17.9862	35.9969		SD609	12
AC233892.1_FG001	1:231851378-231853126	1749	-	0.174022	0.552319	0.67526	0.000373478	1.3773	0.104912	0.420533	0.808198		Shared	16
AC233893.1_FG001	9:146258815-146261098	1687	-	7.34158	22.4419	25.4298	20.7652	15.428	26.8414	13.031	15.5477		Shared	4
AC233893.1_FG003	9:146227327-146228811	1485	+	1.61498	0.437594	1.17481	0.696571	3.26334	2.07709	1.40068	1.77347		Shared	9
AC233893.1_FG006	9:146150604-146154484	2019	-	7.95408	4.70876	7.17907	3.43111	5.74631	3.18547	5.16372	1.96666		Shared	7
AC233895.1_FG001	6:140407102-140410233	1508	+	221.133	91.0204	188.511	151.167	182.741	172.754	173.867	188.854		SD609	3
AC233898.1_FG003	10:10446742-10447104	363	-	6.65919	13.4786	2.34169	7.43394	2.63283	6.47594	7.90023	11.6333		Shared	13
AC233898.1_FG004	10:10394028-10398628	1922	+	2.57979	5.08305	3.2132	4.73959	2.37132	3.87665	2.45576	1.66578		Shared	12
AC233899.1_FG002	9:149663379-149665659	1846	-	2.94635	4.12199	2.45581	6.62974	3.35908	3.97055	2.17908	11.9213	bHLH	Shared	8
AC233899.1_FG005	9:149651898-149652455	558	+	0	0.980873	0.24999	0.199217	0.8591	1.78242	1.1529	0.199623		HS68	4
AC233910.1_FG001	2:197815048-197818335	1544	-	1.27511	2.17602	1.44328	1.8432	1.11382	2.59543	1.3528	1.28383		Shared	12
AC233910.1_FG003	2:197824370-197825061	432	-	0.251017	0	0.396956	0	2.25498	0.628237	12.8867	0.31634		HS68	6
AC233910.1_FG005	2:197756812-197760720	1347	+	171.757	80.3823	176.584	100.736	190.333	103.08	179.424	144.951		SD609	8
AC233910.1_FG008	2:197772737-197773531	795	-	1.76981	0.000860559	4.34067	1.51	1.7477	2.74702	6.56649	1.17851		Shared	10
AC233910.1_FG010	2:197733985-197736724	1275	-	0.916884	2.25591	2.13233	2.31182	2.51263	3.38299	1.96649	2.31853		SD609	4
AC233922.1_FG004	4:238059727-238059957	231	-	56.2174	25.9561	15.9737	3.06031	29.8703	58.2009	61.6892	94.3902		Shared	11
AC233922.1_FG008	4:238041131-238041779	447	+	1.1731	4.37626	7.04884	2.36267	3.1658	2.05542	11.4589	1.18302		Shared	10
AC233939.1_FG003	9:138981484-138983160	921	-	5.05333	8.91851	7.01598	5.79031	5.86232	8.24973	4.74961	3.29003		HS68	11
AC233939.1_FG004	9:138945494-138945923	246	-	47.7532	257.582	4.41417	27.0391	10.3377	11.3032	23.2642	18.1522		SD609	5
AC233942.1_FG001	6:137303314-137306672	876	+	17.1512	22.1062	44.2428	49.5213	29.7314	35.9036	24.885	22.0615		SD609	6
AC233945.1_FG003	3:207892524-207898658	1464	+	0.345722	2.49187	1.53592	2.88769	0.869029	2.11207	1.32012	1.03828		Shared	12
AC233952.1_FG006	2:209490404-209498502	2199	+	26.5184	18.6121	29.4663	24.6622	41.3961	25.3881	37.7891	28.053
AC233953.1_FG004	8:159492566-159496014	2734	+	7.78337	1.79795	3.27764	6.10671	3.56091	2.89953	1.89304	7.23263		Shared	8
AC233953.1_FG005	8:159497261-159502798	2833	-	30.2372	27.5137	42.2489	24.2866	37.5241	26.9647	29.3844	20.0886		Shared	7
AC233954.1_FG003	7:13499886-13501066	969	+	1.07514	0.443235	0.0566186	0.0903458	0	0.089804	0	0		SD609	7
AC233955.1_FG002	9:135309336-135311325	759	-	0	1.84697	0.314332	0.250693	0.723917	0.498399	0.642021	0.628307		SD609	5
AC233955.1_FG009	9:135270349-135273968	3107	-	0.537563	1.8915	0.704026	0.725808	0.464363	0.821545	0.815309	0.563055		SD609	5
AC233960.1_FG002	5:199982296-199984733	1331	-	4.52538	6.07759	9.51907	6.51643	6.43314	4.28868	4.90135	3.06277		Shared	4
AC233960.1_FG003	5:199978948-199981420	840	+	3.02843	3.212	3.34939	2.18102	2.6793	1.30079	2.65062	1.53071	G2-like
AC233961.1_FG001	7:20244021-20246591	2571	+	2.59992	3.39847	0.000545143	0.764715	1.55111	1.83149	2.34718	0.287846		Shared	1
AC233966.1_FG001	2:152920061-152924718	2977	-	6.23323	3.4062	1.66346	2.51376	1.49248	1.99247	2.92185	5.40211		Shared	11
AC233967.1_FG001	2:54479540-54632077	604	-	214.808	70.4531	220.737	126.044	160.691	164.508	158.186	170.175		SD609	8
AC233979.1_FG007	10:135130731-135131021	291	-	61.4572	64.7551	85.2585	76.5785	89.1234	137.766	65.2692	125.344
AC233979.1_FG008	10:135135344-135135658	315	-	57.9414	52.0135	76.4807	69.0296	82.2239	75.7953	41.2909	34.6031		HS68	9
AC234091.1_FG001	2:118690836-118694231	2328	-	0.459445	3.152	2.01575	0.257485	0.303757	0.319904	1.00427	0.452		Shared	13
AC234149.1_FG002	8:123322670-123470635	942	-	0.190212	0.262591	1.04079	1.25071	0	1.06351	0.707625	0.915384	LBD	Shared	4
AC234152.1_FG002	8:102073129-102108536	2943	+	13.6554	25.9988	21.4292	11.5383	24.8724	19.4273	18.4277	6.51531		Shared	2
AC234154.1_FG008	7:138701989-138706394	1987	+	4.54387	4.16011	4.49909	4.6069	3.06781	3.39511	4.82896	7.20657		HS68	8
AC234156.1_FG005	4:198559982-198560791	810	-	71.5089	30.4042	30.8159	30.4596	33.3569	38.8824	29.3806	45.9484		SD609	7
AC234157.1_FG002	1:281107165-281109124	885	-	37.1455	12.8367	20.4361	19.4003	25.1979	13.7072	35.0499	40.4078		Shared	11
AC234160.1_FG003	8:8302743-8305431	1706	-	8.15678	93.2032	9.34624	36.8891	0.761307	2.90265	7.20092	8.78744		Shared	13
AC234161.1_FG010	9:117195934-117203768	615	-	85.9768	47.3837	82.9324	65.5027	106.091	77.5035	96.1421	62.5171
AC234164.1_FG004	9:24972213-24974672	1893	+	1.5754	1.72083	2.61532	0.810779	1.88259	1.8535	2.50523	0.975909	GRAS	Shared	10
AC234165.1_FG002	3:163993407-163994828	1422	+	0.491942	29.4729	5.96939	10.0363	1.55319	2.35382	9.95945	0.791703		Shared	13
AC234166.1_FG002	7:104393093-104398152	1257	-	0.2255	0.248119	3.06587e-06	0	1.80211	1.25054	1.92649	0.309532		HS68	1
AC234169.1_FG004	5:162266567-162267022	456	+	1.35462	4.91161	0.178491	0.284215	1.82918	0.565147	1.83671	2.27712		SD609	5
AC234175.1_FG010	10:2837002-2839083	2082	+	5.16403	5.13001	0	0	0.000138665	0.923241	2.81181	1.23095		Shared	6
AC234180.1_FG002	9:76447237-76453087	1608	+	1.27843	2.75199	1.6828	1.80725	0.673061	1.26228	2.39728	1.71469		Shared	13
AC234183.1_FG002	6:21000370-21024202	2937	-	3.59435	4.31317	7.41538	5.78284	9.42272	5.74808	7.05101	7.381
AC234185.1_FG004	8:72744844-72751208	2407	-	1.7641	3.1285	4.665	2.60607	3.3706	2.39917	5.62589	1.00132		Shared	10
AC234202.1_FG004	10:145539655-145543217	1671	-	1.00065	0.763064	0.263431	0	0.169469	0.0464457	0.0297809	0		SD609	2
AC234203.1_FG004	1:188082927-188089997	5037	-	9.9199	14.8139	5.95902	9.25194	9.36621	9.17533	6.92608	8.77572		SD609	5
AC234203.1_FG010	1:188063594-188066385	1809	-	3.62173	2.64795	5.50675	3.28619	4.1491	3.09663	3.26318	2.39723		SD609	8
AC234203.1_FG011	1:188071750-188073648	1899	+	4.00666	3.26008	0.453335	1.11207	1.94233	3.47515	3.54146	0.370787	EIL	Shared	6
AC234515.1_FG002	5:83560684-83572400	2087	+	0.871875	1.86836	0.559296	1.81404	0	0.274373	0.526241	0.985302		Shared	12
AC234515.1_FG003	5:83556831-83560329	1439	+	82.0318	40.0484	105.558	38.591	48.4526	38.4794	70.2657	41.1178		Shared	7
AC234520.1_FG003	1:164368661-164370806	1627	-	2.03196	3.83505	6.64046	4.15017	3.8337	3.52169	7.62426	1.39734	G2-like	Shared	10
AC234521.1_FG006	2:22267351-22268478	768	-	1.07625	0.504635	0.309191	0.369898	0.0890227	0	1.42079	0.123611	TCP	HS68	6
AC234522.1_FG005	5:40951760-40952467	708	+	6.03934	6.34563	6.07296	5.81131	2.79467	3.98872	4.78736	4.85452
AC234522.1_FG009	5:40921712-40923324	1497	-	0.336806	0.520181	1.6293	1.8578	1.80885	1.26623	0.236891	0.745332	C2H2	Shared	4
AC234524.1_FG005	9:88447369-88449658	1605	-	1.59179	0.199851	0.0919877	0.342651	0.994017	0.681159	0.499216	1.32562		Shared	6
AC234526.1_FG005	7:133868744-133871163	1144	-	0.583913	1.01307	1.15484	0.368049	0.533051	0.878806	0.939728	1.25494		SD609	1
AC234528.1_FG001	1:204225531-204240139	1998	-	2.2994	2.39775	1.86373	2.67043	0.941299	0.568769	2.1385	1.68371		HS68	3
AC234528.1_FG004	1:204257430-204264408	2529	-	105.893	29.6342	60.8243	44.402	99.31	63.2063	73.6078	72.2173		SD609	3
AC234575.1_FG003	6:132657599-132658828	1137	-	7.55706	6.03509	5.32127	2.58472	4.86651	3.00959	5.70393	6.07284		Shared	11
AC235534.1_FG001	10:136944055-136945845	776	-	72.2847	33.4198	44.6516	35.1008	45.8289	51.3713	62.7949	38.7608		SD609	3
AC235534.1_FG007	10:136932960-136939900	2916	+	0.113433	0.250646	0.432861	0.859751	0.906895	1.14504	0.440191	0.308177	HD-ZIP	Shared	5
AC235540.1_FG001	2:120471335-120476660	1369	+	5.35311	5.80538	6.64438	5.33988	2.89813	1.78685	9.41854	9.22668		HS68	8
AC235540.1_FG002	2:120436598-120440613	2235	+	0.614129	1.37393	0.695865	1.14474	0.415489	0.435042	0.986315	0.945651		Shared	13
AC235541.1_FG002	2:69704472-69706682	2211	-	0	0.000279392	0	0	0	0	2.30958	0.924752		HS68	3
AC235543.1_FG002	6:148720280-148723752	1569	-	1.76716	4.02036	5.13414	2.6204	3.41718	3.86693	2.98397	0.90981		Shared	15
AC235543.1_FG003	6:148703697-148706707	1183	+	43.769	46.1374	52.7978	34.2752	36.2408	29.5752	45.2818	25.0073		Shared	2
AC235544.1_FG004	9:149484265-149489198	2410	+	14.4275	11.912	7.32376	2.17139	13.8574	12.0605	13.0785	7.46146		Shared	6
AC235544.1_FG006	9:149524899-149526152	1080	+	0.249811	4.89038	2.46653	5.43211	1.25385	1.87807	1.91016	1.73685		SD609	4
AC235546.1_FG001	7:19750626-19754887	2229	+	5.82573	8.31796	11.1908	9.48233	9.37102	13.3316	12.9406	8.25943		SD609	1
AC235547.1_FG005	1:282405677-282409896	2714	-	4.86588	5.39982	4.94662	3.84769	2.63893	3.08969	5.85706	2.63172		HS68	6
AC235548.1_FG002	5:63424796-63425323	528	-	0	0.358718	0.411235	1.74744	0.784062	1.52006	1.82797	0.218849		Shared	3
AF466202.2_FG007	10:138493023-138500137	1770	-	0.624566	0.857223	0	1.09374	0	0.0434848	0.0557555	0		SD609	4
AF546187.1_FG001	1:161774740-161991666	726	+	610.55	3718.57	70.0022	6594.58	1006.85	3658.71	544.278	1071.82		Shared	12
AF546187.1_FG009	1:162031509-162081082	642	+	8.37367	15.5893	0.300752	1.59848	14.7403	126.645	6.97332	46.4622		Shared	5
AF546187.1_FG011	1:162103210-162104912	1512	-	0.457743	1.19967	0.657315	0.419722	2.89118	2.55527	0.267587	0.263108		Shared	5
AF546187.1_FG012	1:162159727-162160559	648	+	0.375318	1.42086	0.098853	3.46771	0.681426	3.44718	0.303325	2.21182	C2H2	Shared	5
AF546188.1_FG001	7:18744943-18745668	633	+	2351.59	4209.08	38.716	96.5139	4811.23	6116.33	1576.65	9724.85		Shared	8
AF546188.1_FG002	7:18768582-18769307	456	+	4225.29	7509.62	73.3597	187.298	7718.74	8569.05	2697.76	16778.7		Shared	8
AF546188.1_FG003	7:18778882-18779606	456	+	5.19272	18.9448	7.31812	57.6957	21.5437	67.2525	25.3466	45.8271		Shared	5
AF546188.1_FG005	7:18854431-18867189	723	+	5918.02	11172.8	807.405	23358.8	11179.4	0	4709.14	0		Shared	3
AF546188.1_FG006	7:18856739-18857460	519	+	425.828	653.805	3.81166	43.8631	792.743	0	153.26	0		Shared	1
AY530952.1_FG001	6:108341755-108346707	3288	-	1.08686	1.68633	3.97635	2.98753	0.417862	1.19441	1.1119	1.57379		Shared	4
AY542798.1_FG003	1:258871107-258876360	2756	+	5.37825	6.31288	8.59148	10.8894	7.6001	9.5962	6.31251	6.65656		SD609	6
EF517601.1_FG014	3:34663186-34668241	1179	+	0	0.0577101	1.01776	0.565001	0.204614	0.0701999	0.090147	0.424964		SD609	9
EF517601.1_FG016	3:34680724-34681110	387	-	40.3367	53.1365	6.0294	25.158	4.54013	15.0962	7.79874	6.39731		Shared	13
GRMZM2G000052	2:8992492-8997739	2518	+	14.2444	33.4434	13.5641	23.1305	10.1874	17.5315	15.8093	11.6795		SD609	5
GRMZM2G000127	2:98600634-98603380	1954	-	2.15478	2.92948	1.65381	3.0347	2.98538	1.16207	2.66388	1.87939		HS68	10
GRMZM2G000158	6:79915331-79916297	594	-	6.56119	24.9009	17.1407	13.5401	8.32729	5.82035	12.42	7.4971		Shared	13
GRMZM2G000166	2:13712227-13713674	921	-	0	0.236775	0.544344	0	0.837474	0	1.1103	0		Shared	10
GRMZM2G000171	5:61696459-61700245	1472	+	1.7917	1.04511	14.5963	8.29062	4.76929	4.14719	5.09142	3.92844	bZIP	SD609	9
GRMZM2G000177	8:147431779-147448360	2094	+	13.6722	11.6535	7.01012	10.1175	10.9938	12.668	15.838	10.5956
GRMZM2G000209	9:120228103-120230130	1167	+	1.3616	3.36686	0.620219	1.23678	0.954831	0.853087	4.10521	1.57096		Shared	13
GRMZM2G000223	10:128588177-128588533	357	-	2.31511	3.21492	5.19036	4.35977	1.02839	1.92955	2.53798	7.27806		HS68	2
GRMZM2G000231	9:7311740-7319446	2642	-	4.11875	4.35197	1.69106	2.70732	1.95119	0.893404	2.17222	1.46392		Shared	13
GRMZM2G000236	9:7308284-7394799	1470	+	3.46536	7.315	6.40835	29.9142	125.227	73.689	16.8731	23.8132		Shared	5
GRMZM2G000254	6:135352091-135352929	654	-	0.987103	1.27387	1.85239	3.73103	1.79242	1.23632	1.29623	1.45366		SD609	6
GRMZM2G000261	10:128558669-128560009	1341	-	1.53427	1.43192	0.568032	0.302233	0.525696	1.26172	1.23375	0.606236		SD609	2
GRMZM2G000264	7:138089109-138120819	6540	+	80.9675	81.07	92.126	56.7237	51.7565	35.3531	52.3631	43.3217
GRMZM2G000268	10:120450752-120452933	1035	+	0.34329	1.53064	0.90588	4.27719	0.375741	0.494963	1.27627	1.60566		Shared	3
GRMZM2G000271	10:128526561-128528499	1071	-	0.0631056	2.812	0.0997016	2.20348	0.0710175	0.434906	0.279417	1.85263		SD609	4
GRMZM2G000281	7:138098513-138102882	846	-	0	0	0.203114	1081.79	2138.67	569.778	1628.43	894.184		SD609	6
GRMZM2G000292	8:8822293-8823417	1125	-	6.9447	4.34168	6.14179	5.46222	10.8363	8.40436	6.01846	10.7303
GRMZM2G000326	6:39303393-39303605	213	+	0	208.794	0	0	0	0	0	10.2973		SD609	5
GRMZM2G000361	7:155584932-155594864	1376	+	206.048	157.56	345.017	196.45	212.156	219.457	223.158	186.253
GRMZM2G000380	4:123666593-123668045	1362	+	0.18876	2.62656	5.06462	1.16926	2.3647	3.05766	2.24715	0.137346		Shared	15
GRMZM2G000397	2:12129081-12130304	708	+	277.297	270.549	105.152	194.889	185.235	283.217	143.704	165.347		SD609	12
GRMZM2G000404	7:127719590-127728198	2981	-	20.1836	18.6775	15.169	9.00797	15.099	10.3796	17.027	9.99683		Shared	7
GRMZM2G000423	9:14537744-14539364	1079	-	0.252078	26.4947	9.8174	26.6319	1.69712	6.34796	1.01105	2.21832		Shared	12
GRMZM2G000427	1:17015524-17018487	1913	+	0.667209	0.29432	0.0271891	0.200306	0.843013	1.35382	0.280742	0.241101		Shared	5
GRMZM2G000435	1:197792656-197794179	873	+	0.246514	29.5669	0.324564	1.13922	0.449182	0.411785	0.463564	0.415362		SD609	5
GRMZM2G000451	7:170248521-170252494	1344	-	6.61678	8.27396	5.68354	3.49897	4.8735	4.85426	3.5241	3.12055		SD609	2
GRMZM2G000453	7:157875730-157876245	516	-	16.5975	7.83762	12.5481	8.179	10.9223	7.22776	10.2431	9.55992		SD609	3
GRMZM2G000481	4:34337714-34341155	1149	+	4.8575	4.88494	13.1089	7.72721	6.22953	5.40167	11.6791	12.5742		Shared	10
GRMZM2G000566	9:101389925-101393917	2709	+	2.78387	11.5935	33.1256	10.5791	7.70069	4.74594	9.96609	3.41145		Shared	14
GRMZM2G000576	4:214511175-214539755	2804	+	4.2206	5.85773	4.08933	3.64209	4.15945	4.84343	2.89967	3.47117
GRMZM2G000586	4:139288-141193	1817	-	12.0299	7.86993	13.6232	13.7136	16.8014	12.9711	7.20474	17.0882		HS68	5
GRMZM2G000587	9:1587738-1588856	1119	+	16.4202	9.83889	20.7614	12.3235	20.603	21.2635	14.5334	16.2659		SD609	8
GRMZM2G000592	4:39780353-39782392	1962	-	2.31596	0.508525	2.46309	1.20702	1.35624	2.28331	2.03389	2.03088		SD609	8
GRMZM2G000601	2:172703568-172707089	714	+	2.46683	7.34357	8.09711	5.38147	3.31651	5.49501	4.87865	2.92919		Shared	2
GRMZM2G000614	3:201535963-201545542	4617	-	3.2749	4.09744	1.98614	1.52956	3.55145	3.98468	3.95383	2.92359		SD609	2
GRMZM2G000620	10:144143903-144147098	2388	+	0.868671	0.766201	0.372405	0.344257	0.431707	0.279957	1.37502	0.910415		Shared	11
GRMZM2G000623	9:1599145-1610565	1267	+	37.3106	40.7414	47.8942	48.799	21.8679	15.6594	29.9052	36.7913
GRMZM2G000660	3:230742866-230745705	843	+	1.55001	2.66379	4.2857	2.93027	4.78409	2.37336	4.72035	3.26439		Shared	10
GRMZM2G000665	2:193164012-193185082	1057	-	1.64975	0.244374	2.9773	0.598471	1.88999	1.20821	1.35623	1.50985		SD609	8
GRMZM2G000670	6:17670823-17672066	495	-	6.59784	2.20899	5.21526	7.08623	2.97758	3.64395	1.89048	4.40605		SD609	3
GRMZM2G000686	1:15806199-15809459	1310	-	15.6702	76.2096	12.4646	80.1035	15.4757	50.3859	25.8566	35.3186	NF-YA	Shared	12
GRMZM2G000713-3	6:51224837-51225058	222	+	4.96644	0	0	0	0	0	5.15018	0		HS68	1
GRMZM2G000739	8:145905659-145909652	2110	+	15.7819	24.14	15.0104	15.5707	15.9257	31.6978	10.3879	15.3422		HS68	11
GRMZM2G000741	1:15907530-15908525	996	+	14.6642	8.76585	3.6046	8.02044	5.23781	7.28207	7.81837	8.39569		SD609	7
GRMZM2G000743	1:271627225-271628098	582	-	0	1.22132	0.934087	0	0	0.185024	2.27215	0		Shared	10
GRMZM2G000764	4:180498340-180504580	2993	+	7.25656	3.11524	7.80173	3.47471	6.56114	2.99222	6.38727	2.67627		Shared	7
GRMZM2G000777	8:89528823-89529278	456	+	21.8997	9.12156	20.348	20.7477	21.5437	26.5619	17.2651	23.9098		SD609	3
GRMZM2G000812	5:126816299-126819058	1199	-	25.1526	130.247	157.407	116.15	61.768	49.2036	119.523	29.8795		Shared	2
GRMZM2G000816	6:149671311-149674406	1550	+	14.4954	22.9535	32.2292	13.2544	15.6382	9.06612	15.4137	5.85034		Shared	2
GRMZM2G000818	7:176129816-176137713	1235	+	3.5498	5.92597	12.6922	15.2327	3.25777	10.4467	8.82739	20.3785	MYB	Shared	8
GRMZM2G000825	7:176127839-176129569	1551	-	2.54046	1.60967	4.87012	1.64244	1.82582	1.90461	3.58155	2.47097		Shared	14
GRMZM2G000829	6:149590349-149596062	3473	-	4.1612	7.19162	3.14942	0.959505	0.0369868	0.319284	5.34146	3.39958		Shared	13
GRMZM2G000874	7:116560-119656	1968	-	4.86468	5.72001	2.94471	3.50573	2.06049	4.02466	4.09587	4.43446		HS68	8
GRMZM2G000923	1:60163169-60165127	741	+	401.456	183.377	418.693	248.023	358.845	288.49	357.075	278.186		SD609	8
GRMZM2G000932	9:24485835-24487471	1086	-	2.23277	8.81843	20.6736	7.66191	8.26384	11.0352	14.0272	1.72486		Shared	14
GRMZM2G000964	4:234621123-234621849	441	-	2.89098	2.74671	2.66671	4.24539	6.71471	3.91946	4.70849	3.34024
GRMZM2G000973	10:133308328-133313700	2093	-	5.70221	3.08093	5.97732	3.69102	5.05239	1.70795	3.84478	3.24016		Shared	7
GRMZM2G000980	2:71787885-71790137	2253	-	13.1129	11.6612	2.917	6.79199	10.499	9.42557	11.698	10.4667		SD609	7
GRMZM2G001024	8:35814755-35816176	1422	+	13.7608	16.5985	6.25251	10.1967	11.4562	14.7632	10.2772	18.4604		SD609	2
GRMZM2G001079	1:44176315-44180705	2150	+	9.0905	7.23294	8.14561	9.90109	5.83828	7.60162	6.05085	13.3993		HS68	2
GRMZM2G001097	5:182573779-182576164	1527	+	2.34149	4.49261	4.11142	4.03451	4.14907	4.9009	3.33312	5.21695		SD609	10
GRMZM2G001114	7:82649126-82657950	1581	-	7.70498	7.78742	9.3029	4.54834	5.86842	4.62865	5.41406	3.90327		SD609	11
GRMZM2G001139	8:155931788-155935272	627	-	0.729644	0	4.74048	1.62177	2.38018	2.77033	2.46057	0.902916	MIKC	Shared	15
GRMZM2G001160	4:2516545-2521248	2151	+	3.94993	5.67634	3.87873	5.59525	3.97427	7.72731	5.93211	8.86081		HS68	2
GRMZM2G001169	4:2514247-2515215	969	-	3.22542	7.09176	1.75518	5.78213	1.17647	2.3349	1.55859	2.6272		SD609	4
GRMZM2G001200	4:192072191-192073135	945	-	1.77696	0.686836	1.11125	0.559944	1.14753	0.556588	1.72953	1.40366		Shared	16
GRMZM2G001221	6:159259831-159262641	1446	-	43.683	35.1605	16.9359	48.6158	42.9403	39.328	21.3095	41.7328		SD609	12
GRMZM2G001223	5:176992034-176993696	1002	+	1.85386	0.165634	0.706584	0.0865481	0.269496	0.247823	0.711065	0	MYB	Shared	7
GRMZM2G001241	2:30232069-30234191	1110	-	7.66494	6.84042	3.06037	1.36904	1.21192	2.26872	1.89431	0.915552		Shared	6
GRMZM2G001247	2:216666053-216666591	450	+	0.231594	0.239966	6.40852	0.874597	0.416768	1.44925	0.753924	0.291954		SD609	9
GRMZM2G001288	1:64717777-64719794	1353	+	5.12345	6.00902	4.83344	2.03351	4.37804	2.79403	5.03527	3.05916		Shared	7
GRMZM2G001289	2:8285423-8291836	3498	+	9.6452	5.12699	5.75157	4.4872	5.59162	4.65575	6.50558	5.05432	HD-ZIP	SD609	3
GRMZM2G001304	6:159246937-159256089	3309	+	15.647	14.6883	107.227	21.0744	46.6478	39.3083	59.0604	16.8158		Shared	14
GRMZM2G001327	6:136692701-136845066	1716	-	843.368	317.832	904.659	507.225	858.014	564.429	583.741	590.016		SD609	8
GRMZM2G001332	6:157323842-157324388	318	-	1.60612	9.10953	10.2166	2.01167	3.23326	4.01155	1.33386	2.01484		SD609	1
GRMZM2G001361	1:64673144-64673900	660	-	1.33886	1.75914	0	0.460063	0	0	1.0818	2.30568		Shared	11
GRMZM2G001421	8:26344820-26350272	2465	+	32.8018	37.0876	13.7078	36.8326	22.0584	31.8991	13.5174	42.1072		Shared	8
GRMZM2G001444	2:229717375-229726342	1071	-	30.1925	31.7084	36.1732	30.3262	25.2463	25.6971	33.369	59.9073		HS68	2
GRMZM2G001451	3:48300050-48302379	864	+	0.16663	0.343606	0	0.315019	0.379492	0.313135	0.1343	3.2638		HS68	2
GRMZM2G001454	9:50181593-50182738	1146	-	4.29976	0	0.000536451	0.000166628	0.480883	1.64381	1.06094	0.66769		Shared	6
GRMZM2G001457	3:229130448-229153727	3651	+	14.0314	12.3039	6.28847	3.9341	1.65279	3.24485	5.20015	5.26295		SD609	2
GRMZM2G001466	10:8803926-8805719	1794	-	3.28031	2.35661	2.59067	1.37868	4.71983	3.98254	4.36493	1.81502		Shared	16
GRMZM2G001500	10:21722785-21727514	2112	+	469.239	146.781	142.718	390.431	518.473	406.809	374.101	676.94		SD609	12
GRMZM2G001524	2:128936549-128937471	576	+	0.600895	1.86279	0	0	0.136087	0	0.48643	0.758512		SD609	2
GRMZM2G001530	10:77677556-77678509	954	-	0.570704	0	0	0	2.92313	0	0.163083	0		Shared	9
GRMZM2G001577	1:236240836-236241594	501	-	5.52498	11.0353	12.6475	6.46188	8.24969	11.6772	5.54998	8.39371		SD609	1
GRMZM2G001592	1:236230816-236238094	2567	+	8.69259	11.2786	5.95911	11.9945	4.86579	7.86974	7.1612	10.1426		HS68	2
GRMZM2G001631	5:19918501-19939710	2753	-	6.22897	12.6095	9.11876	8.474	9.86699	12.3661	10.0671	9.42486		SD609	10
GRMZM2G001660	2:184391453-184395735	1116	-	0.479607	0.926461	2.27297	1.58705	1.42276	1.05167	0.482458	0.833668		Shared	4
GRMZM2G001661	1:297963850-297964904	958	+	8.57637	8.81437	5.5011	8.85729	7.40685	5.93124	3.90849	9.40964
GRMZM2G001663	1:35734125-35738823	2342	+	1.26485	1.9451	0.778148	1.42559	1.11386	1.94137	1.37972	1.98174	FAR1	SD609	5
GRMZM2G001676	1:233395437-233398435	1821	-	1.78052	2.42063	3.39606	3.30397	1.53662	2.56824	2.9958	1.86945		Shared	2
GRMZM2G001696	1:35739887-35744316	2589	-	2.10909	1.66617	0.556126	3.57806	1.90725	4.35567	1.55043	6.03541		Shared	8
GRMZM2G001721	8:19238311-19238913	603	+	0.838232	3.31919	2.09755	0.703984	1.14003	2.09949	1.58221	1.76381		SD609	10
GRMZM2G001750	2:181540669-181547907	1505	-	16.2292	24.4054	32.7418	23.1488	25.175	19.5113	24.2866	12.457		Shared	2
GRMZM2G001755	8:56454228-56463198	1184	-	96.7281	35.8988	50.9055	38.4993	65.8757	48.3845	67.913	59.117		SD609	3
GRMZM2G001764	1:233445617-233449669	1791	-	0.0342351	0.916251	0.324451	0.517991	2.41138	1.33004	0.165029	0.0865942		Shared	5
GRMZM2G001799	9:16249681-16251286	1253	+	0.127344	0.391218	0.397491	0.626556	0.285085	0.912598	2.52199	0.789248		Shared	10
GRMZM2G001803	1:198650259-198655998	1782	-	14.0793	15.9951	30.798	21.6935	38.4115	22.8549	27.8998	27.679		SD609	9
GRMZM2G001805	10:109339218-109343222	997	+	12.3001	13.5305	2.01982	20.9047	8.76057	8.13872	9.74332	27.6878		Shared	8
GRMZM2G001814	1:35762788-35765122	1011	-	1.35765	1.6789	2.7883	1.36907	2.35297	1.2758	3.33409	1.54447		Shared	10
GRMZM2G001816	9:77021418-77026605	782	+	392.372	134.834	482.558	199.584	256.483	216.256	263.404	253.744		SD609	8
GRMZM2G001850	1:233560809-233562244	789	-	120.258	69.1145	199.916	127.562	81.575	107.439	99.9596	111.694		SD609	9
GRMZM2G001853	10:109345620-109346532	828	+	6.8829	75.4693	0.964097	119.977	5.37449	30.0036	1.50724	13.0434		Shared	12
GRMZM2G001875	3:6738769-6740326	1392	+	3.58886	6.2764	9.12297	1.65946	9.99138	4.43742	7.06925	1.22606	MYB	Shared	10
GRMZM2G001898	7:13844716-13850778	1203	+	63.6641	123.983	46.1254	83.9197	70.2566	111.728	82.8396	80.7911		SD609	5
GRMZM2G001904	10:9136787-9143155	1152	+	1.66736	2.50601	9.37156	15.4465	15.4185	12.9001	2.32162	8.64773		Shared	15
GRMZM2G001905	10:148870215-148873376	790	+	83.3241	150.737	33.4844	93.2729	96.4371	166.074	18.4617	46.1086		Shared	12
GRMZM2G001915	8:39579923-39592216	984	-	2.31903	2.10029	1.33225	1.41727	1.21767	1.58486	1.8675	0.621758		HS68	1
GRMZM2G001918	1:39732016-39737049	2799	+	99.3081	34.7258	78.3718	77.2299	125.208	93.5751	96.6595	129.215		SD609	3
GRMZM2G001924	6:12910405-12947056	1899	-	1.46462	1.47233	3.09424	4.21634	0.923461	0.919759	1.01019	2.81497		Shared	3
GRMZM2G001938	7:13841159-13843682	2380	+	0.0498226	8.41229	0.0281089	6.10385	0.0456114	0.942773	0.920077	0.329379		Shared	12
GRMZM2G001953	4:182178196-182194685	2822	+	55.2685	29.774	56.8106	84.7536	84.8338	107.352	75.1678	155.265		SD609	6
GRMZM2G001956	7:13835012-13838317	908	+	6.02445	5.69764	9.2773	6.93941	5.37499	6.00597	4.32051	4.4052		SD609	9
GRMZM2G001977	2:186789067-186790125	1059	-	5.31293	6.52965	9.30338	3.30827	11.9736	3.76963	9.68707	1.61831		Shared	16
GRMZM2G001981	3:226872983-226874993	1136	+	0.176555	1.22263	0.509546	0.665364	0.161033	0.221139	1.25503	1.26929		Shared	13
GRMZM2G001991	8:73846800-73851811	1685	+	8.29297	14.8864	5.53096	16.583	6.24412	9.211	8.74206	19.037		Shared	8
GRMZM2G002034	8:73851712-73854291	1614	-	1.74731	5.28383	9.47694	3.40445	1.73541	1.93463	1.65309	0.194893		Shared	2
GRMZM2G002043	2:186126359-186130860	1245	+	1.61873	3.86557	1.91327	0.904386	2.40127	2.77405	2.92431	1.28512		SD609	5
GRMZM2G002115	6:21528205-21531675	1976	+	13.816	13.2067	10.304	7.62342	15.006	15.395	11.803	21.2903		SD609	2
GRMZM2G002119	3:188571721-188572281	561	-	1.25425	3.40293	2.72586	2.17228	0.425849	0.588959	1.65062	2.17673	ERF	Shared	13
GRMZM2G002124	5:216072541-216075106	2209	+	2.659	1.31487	1.4607	1.67375	1.30561	1.21706	1.56154	1.80893
GRMZM2G002128	6:148827199-148829558	2270	+	3.58544	7.26721	15.6501	4.62122	11.9777	14.9556	11.642	3.64906	MYB	Shared	15
GRMZM2G002131	2:186183628-186186880	897	+	13.4758	26.1502	23.7328	57.5487	22.5381	40.321	17.1179	36.4649	HSF	Shared	3
GRMZM2G002138	1:158183229-158188903	3448	-	3.58815	1.28204	2.54027	1.2249	1.91644	1.90541	1.74149	1.48192		SD609	3
GRMZM2G002147	8:159888375-159890176	1316	+	6.29635	4.23123	16.166	4.37878	5.98718	5.21154	8.95259	5.36363		SD609	9
GRMZM2G002165	3:188530790-188536472	1789	-	15.1891	4.68574	11.3162	12.575	18.5362	10.4263	11.4553	14.3484		SD609	3
GRMZM2G002173	4:124564253-124566883	1410	-	4.89984	0	7.2234	1.66555	5.05345	2.84599	3.01484	2.89374		Shared	7
GRMZM2G002178	1:28926207-28927655	1449	+	1.09354	7.7019	0.51821	16.8201	0.919555	6.24891	2.4615	3.76117		Shared	3
GRMZM2G002199	5:148235245-148239198	1203	-	0.710568	0.619325	1.07931	0.620155	0.648876	0.0684912	0.527665	0.207313		HS68	10
GRMZM2G002220	4:197363825-197368578	2926	-	58.8083	20.7003	32.7416	34.9851	58.2151	56.5172	72.4361	73.2746		SD609	3
GRMZM2G002225	5:13945948-13968400	987	+	0.559997	0.288563	0.110588	0.176468	0.510718	1.05246	0.169108	0.0884767	TALE	HS68	11
GRMZM2G002227	9:16899568-16902730	2157	+	1.97829	4.88434	2.60985	2.73948	2.51961	2.13959	4.22266	1.09456		Shared	13
GRMZM2G002286	4:197369523-197373218	1230	-	0.585218	0.383589	0.462231	1.5426	1.02036	1.79997	0.727524	2.28695		Shared	8
GRMZM2G002297	8:148898041-148905592	1981	+	5.73184	8.82323	4.71696	8.42184	4.577	3.99322	8.3641	5.19272		HS68	3
GRMZM2G002304	8:159900191-159901115	843	-	0.172223	0.088798	2.72108	5.53496	0.941138	4.53097	0.485918	1.6322		Shared	3
GRMZM2G002309	9:129985585-129991275	3424	+	15.1715	13.1313	5.41409	13.6771	9.00124	20.5216	21.0856	24.8393		HS68	8
GRMZM2G002396	7:33375947-33377259	591	-	4.03739	3.72425	0.227892	0.363284	1.13586	0.180572	0.466717	0.910171		SD609	2
GRMZM2G002420	4:223435876-223439461	690	-	58.0834	67.7641	203.927	78.9054	72.0366	76.361	58.4468	36.9091		Shared	4
GRMZM2G002483	10:45998168-45998501	240	+	31.4073	36.8545	0	0	17.7534	13.69	18.6863	13.84		SD609	2
GRMZM2G002492	1:23937373-23941790	1346	+	4.96537	3.93786	4.20162	3.67138	4.36499	7.39993	4.16484	4.80739
GRMZM2G002499	1:264718423-264720401	989	+	5.96525	12.0018	20.554	9.08244	11.7346	10.6431	12.4986	7.02375		Shared	14
GRMZM2G002531	4:213684552-213695557	1897	+	1.58042	1.24543	1.97836	1.64115	3.2641	1.80169	2.59923	2.57183
GRMZM2G002559	2:8808697-8812741	2061	+	4.41242	8.30054	4.40777	4.60571	2.03236	2.01424	4.57648	1.84796		Shared	13
GRMZM2G002578	3:225099000-225100719	965	+	86.5941	87.8057	27.6396	65.8287	68.1377	85.1951	40.4018	81.2891		SD609	12
GRMZM2G002627	5:194108864-194112066	2075	-	0.167616	3.93539	3.59976	4.3807	4.44673	6.08432	4.2405	0.21792	bHLH	Shared	15
GRMZM2G002630	6:31567277-31568589	981	-	62.1243	311.526	5.85506	483.078	31.3725	429.928	69.0222	473.643		Shared	8
GRMZM2G002652	4:210690476-210692927	1167	-	3.34714	5.25967	2.95744	4.36254	8.54646	4.47846	3.46903	3.29919		HS68	5
GRMZM2G002656	6:128823118-128833911	7354	-	0.554936	1.82975	3.35144	2.29993	0.687352	0.520345	1.36163	0.81326		Shared	2
GRMZM2G002754	5:13410208-13428444	1185	-	5.23117	6.28109	5.54879	7.39175	8.22009	9.66459	8.77744	14.9593
GRMZM2G002756	4:82551123-82554434	920	-	13.5218	15.0238	10.986	21.361	9.0884	11.6884	9.26066	17.3587		HS68	2
GRMZM2G002786	8:175400337-175402719	1316	-	27.7113	49.1936	44.831	23.3034	60.884	58.2959	42.1435	24.5319		Shared	15
GRMZM2G002805	5:2378762-2379289	528	-	1.04063	0.358718	0.274157	2.62116	1.88175	4.99449	0.421839	1.31309	C2H2	Shared	5
GRMZM2G002807	2:195920730-195924607	1389	-	7.05678	15.7391	12.396	17.5552	11.1673	14.0942	10.7244	8.6211		SD609	4
GRMZM2G002830	3:41472351-41473098	552	-	6.11793	5.1592	24.6842	6.08353	9.61728	8.26536	13.8247	7.72134		Shared	14
GRMZM2G002858	8:173389307-173414678	3980	+	9.09182	16.7878	17.38	22.1398	19.5748	9.84696	16.0682	14.8866
GRMZM2G002863	10:110943871-110945967	1686	+	1.24721	1.17065	0.81119	0.41626	0.637425	0.459714	0.884281	0.510299		SD609	2
GRMZM2G002894	7:14322635-14330924	2652	-	2.58869	3.59979	5.08123	13.6912	2.63381	9.75932	1.33276	1.5797		Shared	3
GRMZM2G002898	1:223822456-223826437	1359	-	12.2189	2.7842	0	1.14208	0.0136726	0	4.85679	4.63136		Shared	6
GRMZM2G002918	10:110946593-110958809	1469	-	44.2146	19.9945	1.10594	1.0448	6.85605	7.85809	7.33031	9.55231		SD609	7
GRMZM2G002921	10:110956920-110958900	744	+	15.347	12.7396	3.47537	0.773483	7.39672	8.29193	7.51658	6.0165		SD609	2
GRMZM2G002961	5:66852581-66859923	2718	+	0.6492	0.266006	0.272223	0.244501	0.808884	1.4041	0.553486	0.191153		Shared	5
GRMZM2G002993	3:122512977-122514610	1365	-	0.891922	1.93369	1.81676	1.95304	1.41555	4.00016	1.47209	4.98597		Shared	8
GRMZM2G003002	5:4101261-4102480	1022	-	157.421	38.2533	125.019	48.5383	69.8433	50.1474	123.022	81.8137		Shared	7
GRMZM2G003023	9:5346353-5349365	624	-	3.83654	9.68964	7.75449	6.28593	2.47881	3.78128	4.45367	4.11561		SD609	10
GRMZM2G003064	6:124135024-124141460	921	+	33.0382	20.9216	50.7135	21.2074	41.6071	27.2316	32.4564	29.9		SD609	11
GRMZM2G003090	10:34930601-34932147	1326	-	14.9119	11.2849	17.2967	14.1138	7.69867	5.34941	8.3207	3.18149		HS68	1
GRMZM2G003096	3:14335770-14339098	1237	+	1.63889	6.80737	3.9941	4.42693	3.39953	3.05446	7.51399	7.07281		Shared	13
GRMZM2G003108	5:2350234-2356651	2127	+	28.1825	43.5587	29.6797	26.2381	26.0894	21.7044	34.3374	38.9437		SD609	5
GRMZM2G003167	9:4777054-4777932	879	+	0.325704	0.419743	1.54377	0.615764	3.33853	2.04026	2.09983	1.4406		Shared	9
GRMZM2G003186	3:14273252-14303991	1487	+	3.59752	4.82886	4.93253	5.35946	10.1331	6.12419	5.92692	6.47379
GRMZM2G003304	1:218716381-218721113	1666	-	10.1561	12.3225	35.6995	13.6177	13.5275	14.8165	19.4796	10.3793	HD-ZIP	Shared	14
GRMZM2G003306	7:13578267-13578737	471	-	562.492	119.457	456.499	180.006	396.415	287.613	433.612	406.097		SD609	3
GRMZM2G003318	1:101266793-101270779	1613	+	18.2102	11.543	17.9462	18.7338	20.1885	19.8548	18.4481	27.6797
GRMZM2G003342	7:118618830-118624357	1710	+	10.7074	6.57513	6.14032	5.64373	4.61954	4.51678	9.72312	10.3325		Shared	11
GRMZM2G003384	5:179392463-179394116	840	+	156.387	88.0623	265.43	153.451	173.081	159.669	166.011	192.109		SD609	9
GRMZM2G003385	3:185834792-185839508	2251	-	201.746	64.425	296.972	141.337	243.599	166.552	329.231	217.093		Shared	16
GRMZM2G003389	9:81742097-81745387	2200	-	1.49161	5.01205	2.31915	3.50421	1.98088	2.37292	2.36987	2.04551		SD609	5
GRMZM2G003406	8:153463571-153464682	906	-	0.4694	1.69362	7.91048	0.49303	2.70939	1.07817	1.07157	0.593224	MYB	Shared	14
GRMZM2G003409	2:217342846-217345270	1856	+	67.6218	255.036	601.846	327.919	440.262	501.073	1015.52	124.094		Shared	10
GRMZM2G003424	1:54125267-54129089	2901	+	4.3937	9.96221	5.20264	7.38315	7.34812	9.04323	1.50572	1.85779		Shared	12
GRMZM2G003426	1:218800716-218800988	273	-	0	4.11313	13.8327	2.40049	0.820996	1.20518	4.14083	1.20616		SD609	1
GRMZM2G003461	6:13210138-13210434	297	-	4.20521	0.207989	4.85979	4.78719	2.81256	7.11495	8.32779	4.29337		SD609	8
GRMZM2G003466	1:20095265-20096167	903	-	0.314303	1.70105	5.08984	3.4663	3.15082	3.54399	3.92528	0.893724	ERF	Shared	15
GRMZM2G003488	9:68683584-68693894	3164	-	0.687201	3.22732	0.818573	3.68469	0.984008	2.00391	2.93255	1.68364		Shared	12
GRMZM2G003489	1:275469803-275472333	2279	-	1396.58	1.33796	2.43528	0.691943	0.131181	0.532213	160.311	0.937973	HSF	Shared	6
GRMZM2G003493	8:161621315-161622916	1311	+	0.443351	0.507331	1.08942	1.86312	0.360038	0.555567	1.46578	0.93428		Shared	10
GRMZM2G003501	4:166829164-166830621	1458	+	0.738213	0.58127	2.50365	1.20446	1.11137	1.19718	1.78033	0.549104		Shared	14
GRMZM2G003506	1:24675178-24677021	1158	-	1.26004	4.18859	1.01269	1.58985	1.97709	1.56582	3.41018	2.82388		Shared	13
GRMZM2G003514	4:156084023-156091066	1249	+	1.36242	11.9134	18.9932	5.89131	6.62797	5.18209	24.6629	3.08981	MIKC	Shared	10
GRMZM2G003520	1:20106839-20107162	324	-	14.6524	6.33996	17.6023	12.021	21.7818	14.5157	15.494	11.4144		Shared	9
GRMZM2G003526	3:212266422-212268605	828	-	0.264681	2.45648	0.418193	0.44477	0.48204	1.10528	0.142264	0.55741		Shared	1
GRMZM2G003530	1:68436238-68439956	1536	-	1.6194	6.56043	3.53407	7.21242	3.19203	3.30116	3.07663	3.96499		SD609	4
GRMZM2G003558	2:217348965-217350752	1788	-	0.0343005	0.211847	0.866857	0.389235	0.878535	1.07467	0.248018	0.173519	EIL	Shared	15
GRMZM2G003563	2:217355620-217358272	1331	+	13.5437	17.9503	8.35815	12.9972	9.299	10.8113	10.2264	12.9483
GRMZM2G003565	2:49056558-49061244	1704	-	9.10755	7.84214	24.0703	15.2482	11.335	10.1482	19.1559	9.86019		Shared	14
GRMZM2G003607	1:256285889-256292760	2428	+	57.3733	36.4142	12.1094	5.73027	6.49014	6.64873	8.78227	5.09816		Shared	6
GRMZM2G003625	10:3698448-3851203	4342	-	0.905571	1.17411	3.23431	2.66406	3.14857	3.58792	1.65379	1.30332		Shared	15
GRMZM2G003642	4:26394510-26400583	853	-	100.619	48.4567	155.155	49.5242	88.8948	112.66	140.931	75.9313		SD609	11
GRMZM2G003679	6:18845500-18846318	819	+	0.358187	2.58568	1.20261	0.451419	0.244599	0.224362	0.722023	0.339442		SD609	10
GRMZM2G003715	10:78128640-78132510	2141	+	7.54938	8.25666	5.47753	10.3551	7.83433	9.60891	8.22819	14.3025	NAC
GRMZM2G003725	6:113781435-113782706	1272	-	1.80599	2.6305	0.245422	2.14561	0.000953087	1.48725	2.6141	1.81357		Shared	13
GRMZM2G003738	9:136378825-136379433	609	-	1.37565	0.568367	1.52187	0.693211	4.49104	4.47927	0.333804	3.30001		HS68	7
GRMZM2G003742	9:18954201-18956396	2196	-	1.87169	1.18774	0.0015468	0.000134519	1.46983	0.444772	0.8575	0.720495		Shared	6
GRMZM2G003750	10:4664971-4667681	1623	-	0.0719575	0.462079	2.7109	4.7008	5.07943	3.83314	0.954041	0.83859		Shared	15
GRMZM2G003752	2:16219636-16220925	1290	+	19.2606	20.3984	16.5796	21.6218	27.4649	30.3799	42.399	33.8227
GRMZM2G003755	2:134037370-134138819	3963	-	14.471	14.4545	4.12355	5.21416	6.87408	4.73741	5.27784	5.71844		SD609	2
GRMZM2G003765	10:83417628-83419744	923	+	125.281	70.3628	52.7036	106.534	84.4699	78.8831	59.0733	117.867		SD609	12
GRMZM2G003769	2:22950319-22951002	684	-	5.07998	4.17079	0.912216	7.56466	3.04191	5.06138	1.67848	15.6028		Shared	8
GRMZM2G003775	2:28130960-28141893	1749	+	31.5164	40.9594	41.8913	62.6716	47.4653	69.3403	45.1993	50.097
GRMZM2G003784	2:22946976-22948487	1512	+	0.332904	5.01292	0.295792	6.40076	0.60867	2.08593	0.702417	1.63127		Shared	12
GRMZM2G003789	7:25812216-25817531	1719	+	96.2406	153.077	55.8173	134.957	87.1273	134.376	70.9939	110.08		SD609	4
GRMZM2G003794	3:20745081-20747570	2070	+	0.391121	0.115061	1.0088	0.0818067	0.356159	0	1.12314	0		Shared	10
GRMZM2G003796	2:103532815-103534485	1581	+	17.5808	5.4504	10.6712	3.48679	6.17709	5.99075	6.76308	4.79622		SD609	3
GRMZM2G003852	2:221238370-221238903	534	-	59.5529	34.3085	134.478	67.7177	90.637	50.4909	74.614	64.6286		SD609	9
GRMZM2G003861	8:10284075-10287103	1307	+	21.635	32.5292	28.6133	22.16	18.4638	20.5607	27.317	13.7953		HS68	6
GRMZM2G003883	3:44223669-44228745	1530	-	52.6574	21.5089	63.1119	19.9222	59.5099	43.5641	66.076	35.448		Shared	16
GRMZM2G003897	10:83447227-83454492	818	+	217.546	127.075	318.891	137.732	210.903	152.939	192.724	133.098		SD609	11
GRMZM2G003909	1:119412564-119413592	762	+	168.275	0.714298	56.2501	16.3107	77.3225	29.7698	76.9097	19.504		Shared	16
GRMZM2G003917	10:124758950-124759777	828	+	1.23518	0.363923	1.11518	4.00293	1.2051	1.10528	0.924715	0.668893		SD609	6
GRMZM2G003930	8:10287927-10291592	1534	-	1.76725	2.49259	9.31165	3.76458	6.89949	7.11673	8.95965	3.49705		Shared	10
GRMZM2G003937	2:208205986-208206387	402	+	153.705	137.992	258.489	250.533	245.551	285.46	176.923	281.834		SD609	6
GRMZM2G003947	2:189936988-189937401	414	-	8.03619	12.5902	12.2982	20.1117	11.9697	12.133	10.0761	22.0153		SD609	4
GRMZM2G003970	4:21221053-21221673	621	+	1.99147	6.36363	2.99167	5.18882	3.15675	9.44008	4.46856	10.1272		Shared	8
GRMZM2G003984	1:48953306-49000040	3314	-	0.333737	0.21478	0.7363	0.295299	1.10856	0.733957	0.985998	0.431088		Shared	10
GRMZM2G004006	8:6855077-6856254	867	+	0.51739	2.45554	0	2.20698	0.0941042	1.67814	0.167018	1.30721		Shared	12
GRMZM2G004040	8:144484412-144493404	3384	-	15.6923	15.3516	6.32991	16.6595	12.8416	16.948	11.4672	17.3885		SD609	12
GRMZM2G004057-2	1:233889676-233891202	737	-	744.278	320.971	882.067	522.325	832.678	663.18	552.544	624.784		SD609	8
GRMZM2G004060	10:12103301-12104743	1146	+	14.6379	14.9105	19.5128	3.7018	9.86307	4.27642	7.85201	1.3935	WRKY	Shared	7
GRMZM2G004087	5:217274527-217281892	1915	+	16.603	16.689	9.8496	15.0498	22.1234	30.7931	36.6703	27.1458
GRMZM2G004090	9:90125906-90132017	1206	-	1.85277	1.12262	0.903871	1.85482	0.845967	0.341417	1.62201	1.72237	MYB	HS68	8
GRMZM2G004092	5:1675964-1680196	2890	-	3.20427	4.17179	2.59491	6.45985	4.39106	8.08334	6.09426	6.19622
GRMZM2G004111	8:169891378-169891696	228	-	2077.93	1027.68	2027.54	1583.93	1602.34	1108.14	1649.75	913.511		Shared	7
GRMZM2G004119	9:149278436-149308583	2733	-	4.80014	3.82509	3.10164	3.5998	13.8712	8.84482	6.79534	3.88848		HS68	9
GRMZM2G004128	9:86530015-86531562	1296	+	1.09882	1.18312	2.87978	0.944511	0.775676	1.06399	1.40589	0.315754		Shared	14
GRMZM2G004140	5:1682009-1686540	2153	-	21.9829	15.6614	24.4029	12.9127	14.3493	16.2208	27.1206	16.082		SD609	11
GRMZM2G004160	1:267162293-267162811	393	-	6.44308	12.1087	7.52147	2.83963	1.92016	1.15127	6.7742	6.95232		Shared	13
GRMZM2G004172	9:149274692-149277804	878	+	186.305	94.8068	228.348	144.838	143.601	116.141	121.836	127.716		SD609	8
GRMZM2G004180	4:151749798-151750679	882	-	0.243175	0.417843	0.5763	2.65627	0.295427	0.507765	0.065322	1.43411		Shared	3
GRMZM2G004183	3:213605905-213608152	1892	+	110.298	113.391	86.2389	61.0331	88.1591	77.7476	86.4339	126.595		SD609	2
GRMZM2G004211	10:101005463-101007209	874	-	0	0.508325	0.648183	0.323951	0.523258	2.78861	0.781854	0		Shared	5
GRMZM2G004222	9:121601817-121608150	1254	-	3.01602	3.63482	8.79375	6.42691	2.93777	2.26131	6.51147	2.89339		Shared	14
GRMZM2G004259	1:21456923-21461986	1074	+	24.7951	15.414	30.4741	23.8988	33.486	26.5068	33.8669	25.5083		SD609	8
GRMZM2G004290	5:4203611-4205014	456	-	41.0902	21.7514	20.1695	36.0954	47.9652	59.0579	38.0199	49.812
GRMZM2G004305	2:6460493-6467640	3758	+	7.57558	6.90793	1.02517	0.934555	4.40014	4.69791	9.69402	8.958		Shared	11
GRMZM2G004352	2:6471198-6473512	948	-	2.28126	1.7597	0.901577	1.85884	1.54625	1.57052	0.712716	1.86389		Shared	8
GRMZM2G004356	5:4218375-4222351	1706	-	8.44729	11.042	11.9116	12.2252	15.2246	22.1042	17.4118	23.8879	bHLH
GRMZM2G004377	9:149247186-149252471	1791	-	8.35336	9.9378	3.62304	5.4389	4.54091	5.96375	3.9607	3.76685		SD609	2
GRMZM2G004396	6:1244744-1246009	1266	+	12.0732	10.2124	10.0633	7.51309	9.9956	14.8069	16.1154	10.6528
GRMZM2G004412	10:2842183-2993391	4074	+	5.6811	9.7233	4.39492	4.94912	3.77129	5.31379	5.51908	6.50037		SD609	5
GRMZM2G004422	1:21469771-21471181	819	-	11.1198	10.947	9.23531	19.7858	10.9688	19.1119	9.34892	20.6868		SD609	4
GRMZM2G004435	6:1239728-1242666	1482	-	8.98864	16.2733	13.1309	14.609	13.201	20.7038	16.0605	17.1842		SD609	10
GRMZM2G004466	9:149245747-149247285	1375	+	4.02177	9.86423	4.0503	36.0682	1.29611	5.70028	3.50189	1.48173		Shared	3
GRMZM2G004475	7:98407387-98418767	1240	-	44.9921	26.7558	16.0739	12.2139	38.7142	33.3385	20.5932	16.1942		Shared	6
GRMZM2G004480	5:198789188-198790405	1218	-	0.699916	1.44188	4.08241	1.56109	1.42589	1.3493	2.4687	1.36138		Shared	14
GRMZM2G004500	1:290818983-290820601	1428	+	3.56003	0.962278	2.28454	0.448834	0.610074	0.0557656	0.500864	0.281351		Shared	7
GRMZM2G004511	1:290805860-290806751	783	-	91.5272	66.3585	94.6097	50.271	95.6696	79.9348	75.1014	40.1676		Shared	16
GRMZM2G004516	9:115768935-115771447	1996	-	1.19539	5.68901	2.56936	1.43712	2.13529	0.883523	1.80032	0.814074		Shared	13
GRMZM2G004521	2:227277639-227282413	1695	+	38.3259	19.8502	16.3358	5.07702	22.3765	10.8353	25.0145	11.3717		Shared	6
GRMZM2G004523	1:21471941-21474806	2487	+	4.29892	10.3771	1.27264	7.35618	2.82198	3.74669	1.03836	3.75409		Shared	12
GRMZM2G004528	9:149239277-149243999	1992	+	189.9	645.261	105.176	815.65	100.025	267.908	130.21	124.486		Shared	12
GRMZM2G004534	10:4694319-4699346	2350	-	57.2796	72.9277	97.0453	60.3492	80.4628	63.8739	82.3764	44.2687		Shared	2
GRMZM2G004548	5:198819591-198820721	759	-	2.88453	12.5184	8.95846	6.89405	7.51064	8.22358	14.0442	1.13095		Shared	10
GRMZM2G004572	1:141071461-141077313	2921	-	4.95475	5.79441	9.92929	7.49134	6.99273	6.53213	8.73906	5.20762		Shared	14
GRMZM2G004590	2:6475919-6486304	1301	-	166.225	240.892	95.424	348.408	136.566	190.166	164.208	426.826		Shared	8
GRMZM2G004641	1:13641453-13645288	2679	-	5.10256	3.64225	2.44896	1.38394	4.72532	2.98239	5.60531	2.92201	TALE	Shared	6
GRMZM2G004653	3:174285377-174341078	1508	-	5.93034	2.179	3.16582	0	3.75147	1.31211	3.15303	5.12262		Shared	6
GRMZM2G004679	1:140261501-140262094	594	-	2.76799	1.80548	2.91057	1.23321	2.17663	0.978904	1.12047	1.50568
GRMZM2G004690	8:172006104-172008970	729	+	0.315897	0.217295	0.665548	1.45959	0.574494	0.659503	0.0849908	0		SD609	6
GRMZM2G004696	3:10073376-10076506	1254	+	58.1024	71.9083	220.265	103.966	86.7378	63.1553	115.257	60.505		Shared	14
GRMZM2G004699	4:191579003-191580555	894	+	167.297	49.22	45.8256	50.1185	29.9572	13.6897	78.5529	93.5205		Shared	6
GRMZM2G004709	10:139858194-139861244	1084	-	3.7521	10.6907	7.28249	7.58905	6.83808	7.595	3.69182	3.11814		Shared	12
GRMZM2G004715	5:168664994-168667390	2397	-	0.568484	0.635862	0.605099	0.40517	0.565695	0.619558	0.754126	1.00045
GRMZM2G004736	1:71533645-71541469	2781	+	23.39	13.8408	18.8304	30.8712	21.6855	32.515	19.5258	31.965
GRMZM2G004748	4:157609512-157616654	3789	-	12.5496	12.2737	6.39635	11.5101	9.6326	16.1645	10.542	17.5747
GRMZM2G004795	6:160013968-160014780	813	+	7.3749	15.6451	4.0424	23.6568	3.51826	7.25611	2.24282	12.4977		Shared	3
GRMZM2G004856	5:163415743-163419234	2628	-	0.277499	0.899313	0.318921	0.43933	0.470861	0.310176	0.0887522	1.83214		Shared	8
GRMZM2G004858	3:187482932-187486936	1802	-	3.2402	7.9504	2.68871	2.42357	4.8559	4.80635	4.07227	3.29948		SD609	5
GRMZM2G004878	4:81249936-81251787	1616	-	25.0548	14.4323	29.6403	16.8069	11.8368	8.5597	21.3495	15.108		Shared	7
GRMZM2G004880	7:154417815-154420877	1908	+	1.74726	5.82979	6.9086	2.87286	5.01118	3.93925	5.8656	1.04458		Shared	2
GRMZM2G004908	4:137593012-137596379	2168	-	7.12395	10.0218	3.06614	6.05214	7.26221	7.98613	9.04515	6.68103		SD609	2
GRMZM2G004924	10:145738477-145743613	3126	+	6.66533	3.05492	4.57676	3.23092	4.9872	3.80695	6.23589	4.76662		SD609	3
GRMZM2G004932	6:160034272-160040745	1873	-	8.24704	35.5769	14.9592	22.7275	11.1349	14.4099	14.9211	11.6265		SD609	5
GRMZM2G004955	5:62756028-62757316	960	+	1.08817	4.63574	13.0082	5.30352	3.10889	2.36319	3.50571	0.366759		Shared	14
GRMZM2G004959	6:21971952-21975971	2989	-	56.9172	67.0365	52.7136	42.7265	39.1084	26.5414	48.4474	23.0795		HS68	10
GRMZM2G004988	3:135285359-135303525	913	+	7.24765	9.78781	10.4954	15.0245	5.89423	10.2178	10.4479	10.7327
GRMZM2G004990	7:134079351-134083682	2655	+	1.72203	6.64486	20.5828	16.9345	4.28703	7.16084	4.82103	4.80889		SD609	9
GRMZM2G005036	6:160040913-160044991	1500	-	98.3893	52.2128	102.736	84.5952	108.947	119.62	121.579	104.707		SD609	8
GRMZM2G005040	2:10378196-10383476	3166	+	0.866464	3.94216	1.78535	4.80321	1.19356	2.50028	1.39194	1.09062		Shared	12
GRMZM2G005061	8:165528656-165534027	552	+	31.8393	29.6845	59.1601	21.3356	61.9919	67.4139	52.6945	30.4715		Shared	15
GRMZM2G005082	3:199622216-199641071	1857	-	30.2902	35.2601	43.4387	26.3392	36.3724	22.1448	44.707	22.1		Shared	10
GRMZM2G005146	2:183752271-183753824	765	+	0.244191	1.74598	0.77723	0.495897	0.268519	0.305217	0.199866	0.312156		SD609	10
GRMZM2G005155	2:10348670-10368742	2034	-	0.483909	2.40101	11.6213	1.41945	6.67309	5.28597	5.21481	0.368442	MIKC	Shared	14
GRMZM2G005163	8:133187042-133198520	1732	-	10.9086	9.46927	11.6737	4.75864	11.8438	6.7156	12.3025	8.96091		SD609	11
GRMZM2G005187	8:141996384-141997373	990	-	0	0	1.45454	0.000140104	0.000227554	0.304319	0.000339823	0.000106179		SD609	9
GRMZM2G005195	6:120501912-120508316	3911	+	0.670924	1.17958	1.4699	0.728408	1.62724	1.26976	1.65051	0.480494		Shared	10
GRMZM2G005205	3:134764280-134771231	697	+	21.9534	9.21199	14.7077	10.4421	20.212	18.4627	11.7914	11.7758		SD609	3
GRMZM2G005207	10:3992144-3993918	975	+	0.355542	0.732861	0.5617	1.07557	0.972678	1.51458	0.744463	1.34815	WRKY
GRMZM2G005229-2	5:182010687-182013716	618	+	2.95844	6.52761	4.99426	11.1813	4.02534	5.05239	3.80612	6.1125		SD609	4
GRMZM2G005233	5:166472188-166478085	1440	+	0.109604	0.113027	1.21807	0.222215	0.724948	0.27216	0.863865	0.139552		Shared	14
GRMZM2G005236	8:165542340-165548299	2567	-	4.17732	5.95224	8.3441	6.12634	3.82332	4.05807	5.55681	2.50755		Shared	2
GRMZM2G005256	4:162763371-162771455	2158	-	15.9187	11.9995	21.7746	7.36091	18.0026	9.3898	20.2592	16.5105		SD609	11
GRMZM2G005260	5:38151913-38153901	1080	+	0.503863	0.128694	1.99819	0.639432	1.579	0.971925	1.02375	0.47799		SD609	9
GRMZM2G005293-2	6:140784156-140787431	1287	+	7.65571	9.75219	17.5833	12.6888	7.68942	11.6708	19.4512	8.9206		Shared	10
GRMZM2G005298	8:141990198-141992897	2700	+	1.2803	1.85323	1.71367	1.75128	2.64286	2.42059	1.68973	1.34503		HS68	9
GRMZM2G005310	2:10337626-10347296	3212	+	32.1169	12.9492	21.495	15.331	15.7643	18.588	28.4353	29.7935		Shared	11
GRMZM2G005339	9:19289423-19292393	1182	-	21.8294	8.43629	16.5752	11.6799	18.1385	12.0998	26.5343	14.4462		Shared	16
GRMZM2G005374	8:165555546-165559925	1357	-	8.27651	6.54289	7.24319	19.3518	8.85965	7.67042	10.7565	5.94063
GRMZM2G005419	3:134790751-134792393	1002	+	1.08153	2.16857	1.25874	1.33835	1.01228	1.01045	1.07756	1.0126		SD609	5
GRMZM2G005444	3:174533743-174546641	2360	-	8.08204	12.1668	13.831	6.59125	12.4767	9.70049	13.2504	5.60362		Shared	10
GRMZM2G005459	8:159380603-159386428	1368	-	3.09018	4.43587	3.25424	3.06949	1.92528	1.9362	2.86119	1.00644		HS68	6
GRMZM2G005483	8:165581891-165584525	1920	+	9.2076	4.36406	8.97096	5.94454	7.6718	5.82924	7.625	6.56301		SD609	8
GRMZM2G005493	2:215654253-215658900	2129	-	230.194	218.245	80.0849	249.096	206.055	219.067	147.398	247.592		SD609	12
GRMZM2G005499	6:74958732-74967665	2028	-	2.07489	3.90862	3.96325	3.86702	3.3824	4.98337	3.4178	2.23326		Shared	15
GRMZM2G005516	3:106101357-106102277	807	+	0.548215	0.282693	5.12495	4.03025	4.32533	1.60248	0.515763	1.50081		Shared	4
GRMZM2G005522	9:19286890-19288269	1380	+	0.463376	1.47925	1.24434	0.81789	0.846886	0.522605	0.78242	0.996057		SD609	10
GRMZM2G005526	5:55044859-55047332	690	+	1.25387	1.64706	0	0	0	0	1.10468	0.143973		Shared	11
GRMZM2G005557	8:119901803-119903570	1497	-	10.3234	13.3616	9.80821	10.5078	13.9643	10.1514	3.39603	12.5035		HS68	5
GRMZM2G005619	8:1514727-1517555	1440	+	2.55569	2.67697	2.33171	0.611092	2.17479	1.71177	2.58594	1.61583		SD609	2
GRMZM2G005622	6:21940934-21944306	2794	+	32.5726	22.4805	18.249	39.256	47.9591	30.4765	26.1412	64.2736
GRMZM2G005624	1:23241324-23242248	720	+	4.39457	9.17979	1.18558	0.540256	2.14386	1.47687	1.90351	1.89553	HD-ZIP	SD609	2
GRMZM2G005633	10:127370357-127372201	1661	-	118.482	745.067	34.2623	1140.55	147.355	426.582	56.2014	916.856		Shared	3
GRMZM2G005641	7:25493929-25497173	930	+	1.8144	2.57157	3.14387	3.02156	2.60921	4.37196	0.852638	0.105766		HS68	11
GRMZM2G005715	6:157551218-157551721	504	+	4.13513	1.3613	8.31983	3.07699	5.09213	4.23561	4.57598	1.89694		Shared	7
GRMZM2G005749	3:229921517-229996481	1257	+	295.502	64.1126	428.938	198.505	137.102	117.577	301.553	71.7759		SD609	8
GRMZM2G005771-2	5:65023424-65023930	507	-	55.2319	22.3558	66.0385	53.801	10.6632	56.0492	22.6619	36.8457		Shared	4
GRMZM2G005834	3:229995018-229999999	3780	-	0.720566	0.498051	0.837059	0.639606	0.978721	0.638141	0.593322	1.55149		Shared	8
GRMZM2G005840	1:183309811-183310251	441	-	8.43202	14.7324	8.38109	21.5302	7.14791	12.0599	10.5941	7.59146		SD609	4
GRMZM2G005859	10:130509975-130512726	1645	-	89.0118	66.5498	47.3665	47.876	48.2538	31.7135	63.6579	61.3867		SD609	7
GRMZM2G005865	10:126350398-126350661	264	-	34.0043	47.4009	48.277	71.9909	35.3309	51.8636	41.8734	24.0051		Shared	3
GRMZM2G005869	9:131565743-131570499	2165	+	5.48435	11.2061	9.2544	5.74532	15.4099	13.0623	8.84972	4.21491		Shared	9
GRMZM2G005886-2	9:80935697-80939416	1074	+	0.440232	0.583188	2.74616	0.554942	0.393908	0.54648	0.825312	0.73297		SD609	9
GRMZM2G005909	5:193656573-193657604	1032	-	4.10023	4.22511	8.4626	5.83538	8.2656	8.03761	6.81499	6.18599		SD609	9
GRMZM2G005938	10:60227026-60231920	1803	-	10.8288	6.3579	4.10816	14.3698	6.90972	12.053	5.99365	16.8966		Shared	8
GRMZM2G005939	10:127361341-127365866	1658	-	72.5416	84.6687	65.9198	134.287	80.2792	125.654	103.191	167.746		Shared	8
GRMZM2G005954	2:184000234-184001487	684	-	3.95268	0.834188	3.43348	1.12255	0.489055	1.78824	1.31412	1.45834		SD609	8
GRMZM2G005955	1:212331258-212358599	1136	-	15.6921	12.1983	12.6603	12.7952	10.3864	14.8287	21.9952	14.1999		HS68	3
GRMZM2G005973	6:143129039-143134562	1389	+	59.6037	18.1697	58.2639	105.236	64.3762	56.4444	82.2644	63.8235		SD609	6
GRMZM2G005980	8:1523587-1527575	2081	-	40.3301	21.5792	40.0461	33.6807	39.6983	47.6917	43.0631	37.9029		SD609	8
GRMZM2G005991	1:287146384-287147284	606	-	0.831767	1.28504	6.90131	0.349278	9.80483	7.21332	18.8416	1.05015		Shared	10
GRMZM2G005996	5:193651997-193655681	2901	+	37.058	19.8903	16.3445	14.7837	20.5364	20.1287	32.372	21.3059		SD609	7
GRMZM2G006042	10:13783525-13788891	2481	-	36.4703	44.0297	32.9557	43.7316	24.7717	28.0447	49.9357	33.8202	ARF	HS68	3
GRMZM2G006047	1:287110995-287111774	549	-	1.62455	2.18322	4.75044	0	8.96802	1.83074	6.84393	0.410052		Shared	16
GRMZM2G006085	1:45905322-45920573	1196	+	151.104	77.9365	170.787	144.335	170.631	152.371	126.498	145.132		SD609	8
GRMZM2G006112	9:80911015-80912208	1194	+	0	1.76149	0	0	0	0	0	0		SD609	5
GRMZM2G006119	7:169214943-169216788	1157	-	6.70827	101.214	0.86884	122.381	3.24755	19.8925	0.922662	6.13565		Shared	12
GRMZM2G006121	8:150448412-150450768	1513	+	13.3321	13.4554	7.43955	15.0761	11.6163	11.0012	10.9743	21.3509		HS68	2
GRMZM2G006130	3:230006682-230017715	2593	-	9.87703	32.5348	8.7714	16.8854	10.9718	13.2229	9.40845	8.43673		SD609	5
GRMZM2G006206	10:19538082-19540078	867	+	2.65377	4.10417	0.851663	2.61304	1.88876	0.935069	3.54244	3.35355		Shared	11
GRMZM2G006207	6:157578908-157580971	765	+	21.0485	5.89401	51.7483	20.0606	6.33543	16.5802	12.346	8.96596		Shared	14
GRMZM2G006216	10:127356712-127360643	1860	+	4.76589	5.70029	7.48649	9.79735	8.98101	12.1134	6.56628	5.99811		SD609	6
GRMZM2G006219	4:148423925-148427713	1400	-	71.2132	127.031	23.8329	123.913	87.2336	98.0286	32.0585	112.277		Shared	12
GRMZM2G006222	8:106375985-106379644	531	+	2.57668	4.44084	5.02334	3.4615	2.48534	2.58093	2.22805	1.0838
GRMZM2G006229	3:183383111-183388755	1691	-	1.54699	1.89095	3.17025	1.99855	3.05187	3.26226	5.02479	4.53639		SD609	1
GRMZM2G006234	4:239680575-239681705	1131	+	4.0687	4.98134	3.53977	2.30435	3.49879	3.54656	2.89449	3.57815		SD609	2
GRMZM2G006252	4:187988595-187992945	2124	+	2.27797	2.05279	3.68316	2.91822	1.17061	1.93437	1.20571	2.10005		SD609	9
GRMZM2G006277	3:166019016-166033889	1059	-	11.4293	8.98352	5.85682	22.2882	11.4506	14.4282	11.0669	17.4292		SD609	4
GRMZM2G006293	1:191263850-191264317	468	-	216.903	131.282	264.17	214.208	295.785	224.455	223.918	249.055		SD609	8
GRMZM2G006325	7:29167228-29172740	4984	+	2.78534	4.6547	3.93489	5.35716	2.94549	1.47468	2.66714	3.19939		SD609	4
GRMZM2G006329	5:14467963-14471978	2412	+	6.39201	6.30676	11.6047	11.2954	13.1858	16.0171	11.8212	11.393		SD609	6
GRMZM2G006341	9:136510932-136516851	3496	+	0.524665	1.31201	2.81018	1.60801	1.93086	1.80336	2.80467	1.24655		Shared	10
GRMZM2G006363	4:3892374-3894268	1662	-	0.500373	1.22843	1.61118	1.98975	0.774338	1.20593	1.01206	0.827497		SD609	6
GRMZM2G006370	1:45920386-45923114	1836	-	4.10536	4.90054	5.28563	4.6543	2.99789	2.59406	3.74175	2.18153		HS68	6
GRMZM2G006428	10:127339152-127349402	2406	+	8.71811	9.59582	7.81367	12.5163	5.73447	6.08393	8.25013	7.51289
GRMZM2G006450	8:151310955-151312624	1002	+	1.92252	1.98124	2.49487	1.38477	2.19192	1.89263	3.98066	1.38859		HS68	6
GRMZM2G006452	3:166007926-166018262	4217	+	20.691	11.2995	17.2804	11.8739	17.3799	15.9803	23.3999	17.7639
GRMZM2G006453	3:169576810-169579783	1299	+	6.72878	10.4486	20.8361	10.2361	9.15934	8.58514	8.00021	5.12038		Shared	4
GRMZM2G006463	8:40948482-40951961	873	+	2.92409	2.65056	4.13865	0.934592	2.03525	1.59259	3.61005	0.415362		Shared	7
GRMZM2G006468	4:59649418-59653757	1481	-	9.08616	16.5121	8.48178	13.7561	4.51458	3.81157	6.10044	3.09906		HS68	6
GRMZM2G006480	4:3888768-3891341	1633	+	4.82699	7.29788	6.44592	4.72847	3.89798	5.05201	2.53876	3.42349
GRMZM2G006497	8:13136939-13138110	1026	+	0.333117	0.617883	0.157878	0.419904	1.03323	0.417383	0.107278	0.252642	WRKY	HS68	5
GRMZM2G006526	8:6480545-6482617	715	+	68.7542	40.3398	21.6052	35.989	45.0786	37.8795	45.7932	47.1489		SD609	7
GRMZM2G006554	8:59131222-59170477	1168	+	30.0695	4.52993	4.93455	14.6716	6.6563	4.55748	4.67525	27.7494		HS68	2
GRMZM2G006585	8:52091028-52092234	832	-	5134.55	527.502	2155.16	602.359	4514.06	1246.76	4857.6	4475.27		Shared	16
GRMZM2G006631	1:19100029-19102271	1852	+	1.57666	2.50046	1.86819	2.63679	2.12203	1.55393	0.484768	0.753265	bHLH	Shared	12
GRMZM2G006661	8:95012805-95017572	2691	+	8.9266	12.9785	15.2084	18.2506	13.714	15.1692	11.1161	14.1892		SD609	6
GRMZM2G006672	4:131010551-131027589	1491	-	48.7751	31.926	54.8349	23.0309	42.5885	27.9823	38.8265	29.9179		SD609	11
GRMZM2G006714	9:136558039-136561563	2174	-	0.57856	0.95084	0.630594	1.28458	0.796319	1.24301	0.375901	0.60803		Shared	12
GRMZM2G006721	9:147800336-147801814	1065	+	1.40324	0.722733	1.96491	0.723413	0.989423	0.95904	1.95104	0.56419		Shared	7
GRMZM2G006732	7:173039716-173042525	1263	-	38.8567	5.22072	29.9268	11.4793	38.4754	21.2117	30.9207	12.5901		Shared	16
GRMZM2G006752-3	7:133159967-133161796	1830	-	1.69656	1.96521	0	0	0.860613	0.000846976	0.712916	0.000184063		Shared	1
GRMZM2G006762	4:185441524-185444028	1416	-	0.254846	0.27703	4.82845	1.59325	0.231637	0.64468	0	0.227332		SD609	9
GRMZM2G006763	3:181506746-181508128	1383	-	2.63445	1.761	2.59178	1.3402	3.12544	1.91129	1.04052	0.701291		Shared	9
GRMZM2G006765	2:140057112-140059535	1646	+	4.52046	4.6962	60.569	2.14622	2.64963	0.865809	67.1756	0.953782		Shared	10
GRMZM2G006780	4:203535788-203537599	1812	-	1.55993	2.46353	1.72532	1.23809	1.64994	0.987009	1.28424	0.620981		Shared	2
GRMZM2G006791	5:172392045-172397041	1644	-	2.42372	2.06568	9.58876	6.01898	2.64877	2.2952	7.17896	2.44704		Shared	14
GRMZM2G006841	3:131618094-131619149	690	+	0	2.23529	0	9.91041	0	0.428329	0	0		SD609	4
GRMZM2G006884	9:136572388-136583799	1668	-	1.40975	5.14052	0	0	0	0	0.998069	0.482818		Shared	13
GRMZM2G006894	10:146179516-146186531	2886	+	50.0228	59.7739	97.5988	45.1069	57.8491	52.5463	65.7489	32.4135		Shared	14
GRMZM2G006937	5:78255201-78310041	2314	+	3.93932	16.3873	6.35145	7.83013	7.04328	4.50857	6.0948	2.99798		Shared	13
GRMZM2G006943	7:97874447-97893663	4640	+	1.24754	4.29538	2.41952	3.57672	1.07404	1.36852	1.78451	1.31489		SD609	10
GRMZM2G006948	10:124525264-124532371	4512	-	8.24968	13.0479	4.02375	13.0039	7.74057	12.6494	7.63641	12.8059		SD609	4
GRMZM2G006973	9:24597128-24599729	1311	-	0.0985224	1.0654	0.311263	0.248416	0.225024	0.432107	0.198078	0.186856		SD609	5
GRMZM2G006977	1:22379703-22384904	3063	-	6.34219	6.60303	2.82564	4.75085	5.08072	9.42027	5.53098	4.88563		Shared	5
GRMZM2G006981	1:45941209-45942904	1334	+	12.4383	14.1309	4.06809	11.1555	13.3098	16.2821	11.0086	16.7994		SD609	2
GRMZM2G006985	2:135820376-135820831	345	+	14.3524	61.1852	83.1874	6.35455	83.3831	40.0978	302.687	12.7323		Shared	10
GRMZM2G007012	4:22937869-22939419	1551	+	5.53426	5.40681	0.638088	0.814904	0.147733	0.961851	2.66235	1.68576		Shared	6
GRMZM2G007021	8:25121395-25122312	918	+	8.40786	16.0933	6.13551	5.53838	10.7848	22.6138	12.1441	13.6941		Shared	5
GRMZM2G007028	2:225825296-225833390	798	-	8.35069	4.11493	9.89576	7.016	7.01008	11.5073	9.95232	6.91678		SD609	8
GRMZM2G007038	6:141667293-141690027	3522	+	61.2045	52.8907	22.8196	43.2605	36.7319	42.6881	44.8068	63.7824		SD609	12
GRMZM2G007053	3:170426095-170427172	681	+	0.929609	0.359819	2.29531	0.292829	0.422263	0.436638	0.750855	0.440288		SD609	11
GRMZM2G007055	1:38869514-38872636	1803	+	26.3566	14.7056	8.19736	29.278	17.6294	20.1944	6.8171	37.8918		Shared	8
GRMZM2G007057	8:3195583-3196452	765	+	6.39875	3.40298	17.3988	3.38371	5.96887	5.07071	7.98688	5.02567		SD609	11
GRMZM2G007130	1:22373986-22375481	1038	+	0.196948	3.38238	0.777843	1.07579	1.19788	1.39836	1.00417	0.912823		SD609	5
GRMZM2G007140	10:60749734-60764237	1056	+	2.63385	0.661925	0.964113	0.404891	1.17231	0.885408	1.7065	0.406023		Shared	16
GRMZM2G007151	8:29145644-29147346	1083	-	12.2754	18.8036	22.9817	15.6382	25.3085	12.8042	9.01235	12.7773		Shared	9
GRMZM2G007157	2:9998314-10002636	2912	-	18.8873	29.8953	3.56619	9.66631	8.63211	8.24966	17.4465	15.0666		SD609	2
GRMZM2G007188	1:22773361-22776419	1026	+	28.2453	22.9016	40.709	19.3226	15.8242	10.1663	28.0148	19.7276		Shared	7
GRMZM2G007190	7:148589257-148621491	2045	+	8.51439	8.55085	5.42087	4.93879	4.82856	3.85431	7.15351	6.15372
GRMZM2G007195	6:138247778-138251640	1344	+	29.4278	52.0814	53.0165	71.3598	44.9328	67.1089	26.3637	43.9491		Shared	3
GRMZM2G007201	5:171890276-171892589	561	-	71.1944	35.8443	140.442	58.4854	96.7217	70.3568	93.9275	93.777		SD609	8
GRMZM2G007236	8:25130927-25132051	969	-	5.16067	4.50622	3.85006	0.813112	2.4183	1.34706	5.25304	2.26483		Shared	7
GRMZM2G007248	10:61495126-61497126	2001	+	1.97997	1.43934	0.565682	1.18063	1.28066	0.985238	0.61052	0.481032		Shared	6
GRMZM2G007249	7:124279390-124280522	981	-	0.0765567	3.56274	13.3614	2.3121	9.26473	10.5188	7.53029	0.445946		Shared	15
GRMZM2G007252	9:122820410-122825122	1483	+	1.06243	103.778	0	54.3021	0	1.49362	0	1.84577		Shared	13
GRMZM2G007256	2:9996736-9997684	709	+	101.023	58.278	154.136	193.751	140.849	368.183	46.4517	337.515		Shared	8
GRMZM2G007258	8:3196927-3203639	1115	-	15.3334	5.03159	15.1161	12.3577	8.3551	8.96679	11.669	5.0138		Shared	7
GRMZM2G007277	4:204712701-204717431	2144	-	1.7066	1.6691	1.98752	1.44562	2.32077	2.21258	1.75027	1.02579		HS68	1
GRMZM2G007283	2:150699910-150704316	1731	+	62.8423	56.6362	30.9486	31.7011	37.5862	38.4367	56.1579	58.4823		SD609	2
GRMZM2G007288	5:144580664-144586275	1860	+	5.51912	4.91345	5.04335	5.862	9.80744	18.4107	6.70092	7.87694		HS68	11
GRMZM2G007306	4:121444252-121444731	480	-	0.410276	0.637097	0.324322	0.774857	1.2949	2.56786	1.16662	2.84586
GRMZM2G007324	2:208999368-209001150	1518	-	8.0771	2.64415	5.65954	6.9457	7.15687	5.50223	5.62663	7.54258		SD609	3
GRMZM2G007384	8:105779774-105781627	1854	+	1.94928	3.74312	0.00343013	1.89684	2.53492	4.50215	2.86284	2.35885		Shared	5
GRMZM2G007404	8:87034404-87038000	1320	-	55.5522	85.3524	57.6396	112.152	83.1033	127.902	39.5695	77.1163		HS68	7
GRMZM2G007406	9:140949358-140950134	777	+	2.50295	1.48948	6.31248	8.73489	4.90575	18.8128	2.40731	5.83804	ERF	Shared	5
GRMZM2G007453	2:9984997-9991529	5079	-	7.01331	11.4008	6.83216	11.1151	7.69718	9.38743	4.70315	6.21355
GRMZM2G007466	5:183121192-183127463	2377	-	3.1089	3.20165	8.46643	2.53684	3.01081	2.52624	4.96012	3.02018		SD609	9
GRMZM2G007475	9:136923647-136926344	1233	-	13.005	8.70167	7.84205	5.46833	7.09911	5.08896	9.35011	10.9148		Shared	11
GRMZM2G007477	10:146170662-146172390	1393	-	1.40217	2.30983	2.1693	1.83771	1.2784	1.40399	0.496948	0.355474		HS68	9
GRMZM2G007489	6:71230333-71235105	2077	+	28.7051	37.9457	18.5167	33.3882	27.9985	28.0668	22.5128	19.9749		SD609	4
GRMZM2G007514	9:136915418-136920677	3867	+	0.398554	0.759247	0.3497	1.20997	0.162301	0.629062	0.532998	0.597584		Shared	3
GRMZM2G007546	2:56437407-56441170	1427	-	1.07508	1.31937	1.15943	1.06747	0.898	0.781367	0.32267	0.823944		HS68	7
GRMZM2G007628	7:127177720-127187332	549	-	13.271	22.0952	20.3094	12.2678	7.12303	2.93065	13.3494	5.07695		Shared	2
GRMZM2G007630	8:149039697-149041045	633	+	10.6289	13.3851	8.09143	15.5141	6.9399	13.9613	13.2033	9.8206		HS68	6
GRMZM2G007659	3:178059283-178062566	1221	-	0.820886	0.627097	1.34774	0.890241	0.879679	0.737175	0.431013	0.666181
GRMZM2G007680	10:7355179-7427028	2633	-	17.8259	27.415	15.4691	15.6568	18.5731	21.8763	12.7163	30.8606
GRMZM2G007681	1:188717100-188811393	5058	+	7.52773	13.0931	7.97651	7.55415	8.45815	9.15392	9.98273	5.97758		Shared	13
GRMZM2G007683	9:14911333-14919417	1089	-	47.672	32.6095	33.5191	39.3384	17.2281	28.4095	10.8346	22.6574		HS68	7
GRMZM2G007695	5:4268684-4270784	1215	+	47.4674	13.6278	41.7147	20.0148	37.0855	36.8789	29.4532	28.675		SD609	3
GRMZM2G007715	2:236751791-236760676	1990	-	1.28718	1.35148	1.00107	1.24284	0.900384	0.822768	1.05689	0.415498
GRMZM2G007729	4:179822008-179823424	1199	-	1734.69	174.337	702.087	200.709	250.214	84.5893	342	195.029		Shared	7
GRMZM2G007736	4:61407785-61412382	2862	+	0.272966	0.335385	3.14139	0.564882	1.37367	2.04949	1.417	0.842387		Shared	15
GRMZM2G007791	2:9970668-9977799	3102	-	9.56037	19.9691	23.8456	9.28121	13.2149	14.9854	21.0475	9.54485		Shared	2
GRMZM2G007810	5:15696734-15703073	2537	+	19.9164	36.2036	16.0066	25.1496	25.0888	18.334	19.621	23.4477		SD609	5
GRMZM2G007848	8:149032245-149038178	2426	+	12.7226	9.80196	10.3693	6.12121	6.60867	4.52612	9.17764	3.37892		Shared	7
GRMZM2G007899	10:139840539-139841076	423	-	11.2662	13.5876	14.0881	12.5294	8.7007	8.52392	17.52	14.1955		HS68	3
GRMZM2G007907	5:4502464-4517676	2530	+	8.72987	14.3744	4.61049	18.3574	11.9608	9.79562	10.9734	20.1881		SD609	4
GRMZM2G007909	7:159863208-159891500	1156	-	7.46148	4.67103	17.908	3.88011	13.991	7.06191	8.91315	3.19269		Shared	16
GRMZM2G007914	2:9966194-9969567	1615	+	8.83495	12.0793	9.01127	8.83909	7.19021	4.08845	9.88635	7.58949		HS68	3
GRMZM2G007939	1:95189135-95192425	1656	-	7.93274	12.7551	1570.96	18.789	16.7571	141.265	26.7155	15.2434		Shared	14
GRMZM2G007953	4:50313305-50315390	1179	-	0.0918354	1.32532	1.30528	0.847653	0	0.46019	1.89312	0		Shared	10
GRMZM2G007957	9:14906915-15166597	1584	-	34.776	31.1272	57.1546	61.7751	42.0408	48.3446	28.0935	30.5644
GRMZM2G007981	4:36492669-36499597	5150	-	70.7099	19.07	12.5077	12.4749	17.5744	13.2883	20.6114	20.1444		Shared	6
GRMZM2G008060	2:9961474-9963158	777	+	17.5207	15.6892	10.7997	25.962	12.79	13.989	7.68786	21.0413		HS68	2
GRMZM2G008064	1:6422869-6425570	1107	-	1.39282	0.748682	2.15248	0.229014	1.32654	1.06231	3.07036	0.842093		Shared	16
GRMZM2G008072	1:278605036-278608047	2135	-	0.0351032	0.607171	0.933791	0.389685	0.493904	1.4788	0.631734	0.133188		Shared	15
GRMZM2G008152	9:14904534-14906800	2006	+	0.656826	1.23683	0.642311	0.901115	1.05341	1.28783	1.02244	1.89099		SD609	5
GRMZM2G008166	6:111707681-111710974	585	-	7.38753	9.81014	5.56614	5.45819	6.20662	4.24268	14.4618	9.01371	bZIP	HS68	3
GRMZM2G008175	4:94291509-94292258	750	+	2.08943	0.378065	0.000836964	0.114814	4.52147	2.60672	1.38757	0.481783		Shared	6
GRMZM2G008196	6:111899660-111900643	984	-	0.0702735	0	0.166531	0.0885791	0.448617	4.75457	0.226364	0.35529		HS68	4
GRMZM2G008216	2:170224507-170227162	1039	+	23.6399	14.5776	22.9867	22.9006	33.4599	24.762	29.5443	54.2584		HS68	2
GRMZM2G008247	10:37755018-37759557	1692	+	0.04598	1.47321	0.0865622	2.78436	0.0840387	0.633839	0	0.138609		Shared	3
GRMZM2G008252	6:128467767-128484290	410	-	89.5	55.1501	89.3574	47.5046	103.773	77.3338	77.4461	73.6321		SD609	11
GRMZM2G008263	7:34872717-34879786	2580	-	16.5904	38.0042	16.3103	43.8438	18.413	20.5209	17.2627	16.5416		SD609	4
GRMZM2G008271	10:80848637-80875061	565	+	34.4919	871.347	523.388	38.8213	188.686	67.0977	872.705	28.3749		Shared	10
GRMZM2G008286	8:80677903-80680541	1319	-	1.07966	2.31675	0	0.355562	0	0	2.32559	0.353586	HB-other	Shared	13
GRMZM2G008287	10:148261926-148267318	1676	-	8.44047	10.7728	15.9067	15.4574	30.8712	12.3203	18.7882	18.7981
GRMZM2G008290	1:237656114-237658389	1683	-	33.9323	53.7707	25.0904	31.7189	37.0011	43.727	34.1631	37.634		SD609	5
GRMZM2G008309	7:157680252-157681402	1053	-	2.19201	5.58017	3.0555	1.46284	1.94122	2.98888	2.54303	1.62992		Shared	13
GRMZM2G008326	9:13664131-13664932	672	-	1.30352	0.36697	4.40066	0.746552	0.968714	1.33582	1.43594	0.59865		SD609	9
GRMZM2G008341	4:29922293-30061003	702	+	3950.97	11350.2	639.944	37720.3	17568.9	32537.9	4322.63	0		Shared	3
GRMZM2G008353	6:111919479-111920489	1011	+	3.66567	15.1101	3.21726	7.10208	4.82977	76.0379	2.2956	7.80817		Shared	5
GRMZM2G008359	9:107072474-107074465	857	-	5.06543	5.54005	3.86949	4.98091	1.04503	2.92047	2.11891	1.08331
GRMZM2G008369	4:1078522-1094546	2565	-	2.35485	2.63214	4.97696	2.1793	3.41086	1.78649	5.56188	2.36033		Shared	10
GRMZM2G008403	10:80864564-80865028	357	+	13.8907	38.5791	101.049	5.81303	73.3585	42.9325	255.702	5.82245		Shared	10
GRMZM2G008406	5:212617659-212618283	621	+	5.06102	3.61329	24.5301	7.08833	4.33737	1.99634	15.9186	2.28651		Shared	14
GRMZM2G008425	9:79411550-79415495	1998	-	2.23718	4.57993	3.84336	5.10442	3.87255	4.58466	3.66199	3.52676		SD609	4
GRMZM2G008430	8:93482812-93483887	675	-	1.29497	0.72911	7.8133	2.698	0.947555	1.58386	5.85471	7.19041		Shared	14
GRMZM2G008464	8:80681469-80684881	379	-	319.136	235.259	127.553	150.067	34.5783	64.6831	145.725	126.034		Shared	6
GRMZM2G008468-2	7:162720116-162723330	1382	+	0.774583	3.21018	1.30174	2.55877	1.42445	1.94072	0.870491	0.989511		HS68	11
GRMZM2G008474	8:94117633-94118407	708	+	0.329419	2.94619	0.347026	0.276729	0.499048	0.550169	0	0.277401		SD609	5
GRMZM2G008482	4:37101580-37102980	1215	+	0.864053	0.556241	1.109	1.56579	0.394576	0.203003	0.695068	0.751094		SD609	6
GRMZM2G008507	4:10479149-10485506	3527	-	3.75657	8.65704	5.30896	3.27983	5.6351	5.59143	5.99468	7.10921		SD609	10
GRMZM2G008539	9:37699976-37701415	1440	+	0.969399	3.13069	0.974447	0.888861	0.805477	0.828276	2.9756	2.28445		Shared	13
GRMZM2G008558	6:109613739-109614659	921	-	1.90289	0	0	0	0	0	0	0	GeBP	SD609	7
GRMZM2G008593	5:129222356-129224563	1674	-	0.36985	1.29453	0.642616	0.326424	0.135297	0.23175	1.09962	0.654819		Shared	13
GRMZM2G008607	1:234307862-234324429	3502	+	94.4279	86.5781	41.7624	115.351	117.629	109.495	88.0389	122.024		SD609	4
GRMZM2G008611	10:146728443-146802913	1708	-	27.0206	13.852	7.56402	5.64163	5.34828	10.9185	26.9456	24.1886		Shared	11
GRMZM2G008622	10:148233915-148237249	2187	+	0.465339	2.42313	1.90313	2.52108	1.07814	4.42531	2.02224	5.26461		Shared	8
GRMZM2G008638	9:147841437-147856034	1619	+	16.1624	20.5683	18.4349	18.7824	15.4141	8.37055	17.0756	10.3756
GRMZM2G008642	6:129222076-129225319	1794	-	0.865491	1.33735	0.701996	0.763723	0.791818	0.394633	0.695998	0.398395
GRMZM2G008647	5:113060020-113066157	1566	-	17.6015	33.353	7.03668	25.7671	9.36033	7.08489	23.5715	13.9492	MYB_related	Shared	13
GRMZM2G008657	7:83367345-83369122	1575	+	8.61122	1.35233	11.0173	4.37123	7.71531	8.1442	5.27395	3.0365		SD609	8
GRMZM2G008663	1:219723602-219792698	4361	+	2.188	13.9829	11.5191	14.6463	8.31653	9.56747	11.6175	7.63624		Shared	12
GRMZM2G008687	7:156501367-156504508	828	-	3.97021	8.82513	4.03459	6.88141	2.32986	3.56393	3.69886	4.01349		SD609	5
GRMZM2G008691	4:179801527-179803136	1038	-	4.33581	4.87352	7.07367	2.20326	7.20097	2.71446	12.9179	3.5683	bHLH	Shared	10
GRMZM2G008714	10:148229081-148233077	1830	+	35.2779	31.8082	40.9474	19.9659	30.9892	18.1285	40.4721	18.3367		Shared	7
GRMZM2G008726	3:204285337-204290246	811	+	4.75966	3.93102	5.6343	2.63076	1.90977	1.59192	1.75635	2.63135		SD609	11
GRMZM2G008728	5:214501832-214505815	2206	+	44.6877	36.5221	18.7505	17.4712	42.0103	38.4359	29.8741	26.2597		Shared	6
GRMZM2G008748	4:128262849-128295339	780	+	99.395	39.549	215.466	139.492	204.012	133.97	158.795	164.742		SD609	9
GRMZM2G008751	9:147818720-147819705	879	-	1.38424	5.12086	1.67242	1.43678	2.22568	1.32617	0.853057	1.4406		Shared	13
GRMZM2G008764	3:204281299-204283646	1320	+	1.02604	1.00637	2.7785	1.10875	1.42845	1.10207	2.94685	1.3591		Shared	10
GRMZM2G008773	1:3889689-3890027	339	+	0.442951	10.631	9.81693	16.6625	7.44216	6.64252	15.3546	1.11299		Shared	10
GRMZM2G008792	2:27546274-27550813	1587	-	3.56367	2.95504	5.16719	3.01814	4.03135	1.38725	3.72984	5.95547		Shared	7
GRMZM2G008819	4:179792989-179793744	618	-	0.941322	5.13875	1.06261	1.86355	1.46376	2.35778	0.652478	1.69792		Shared	13
GRMZM2G008839	4:179786984-179787517	534	-	0.340302	10.0286	1.34478	0.64289	2.30824	0.426083	0.689594	0.429426		Shared	13
GRMZM2G008859	4:234569453-234572617	1242	-	16.3912	12.745	39.7026	25.7939	38.5452	45.6452	20.2801	25.6748		Shared	15
GRMZM2G008898	2:232380987-232384191	1006	+	1.40868	1.21218	2.69813	2.39873	1.1839	2.64328	2.25915	2.03583	bHLH	Shared	4
GRMZM2G008923	9:9919838-9922673	1194	+	0.300447	0	0.118716	0	2.0413	1.1287	0.364822	0		HS68	9
GRMZM2G008972	5:29443329-29446422	1187	-	5.85455	4.38918	1.32193	2.42944	1.45387	1.29072	4.39614	12.0534		Shared	11
GRMZM2G009019	4:119469484-119472900	1993	+	1.81626	4.49386	3.7671	2.0808	3.16747	3.2285	2.32928	4.23287		SD609	10
GRMZM2G009025	6:4015508-4017164	1512	+	1.62291	0.385609	2.10341	0.629583	1.33147	0.469335	2.44173	0.684081		Shared	16
GRMZM2G009060	1:52394112-52398559	4031	-	0.19098	1.39313	0.771963	1.0332	0.629631	0.568021	1.64363	0.451361	G2-like	Shared	13
GRMZM2G009080	6:84050507-84051968	1376	-	9.09345	29.1082	4.38669	8.05637	5.38582	9.76755	15.4048	16.4426		Shared	13
GRMZM2G009103	7:153854930-153856951	1155	-	0.804401	1.83489	1.9061	0.941616	1.57369	1.58391	3.32867	1.16222		Shared	10
GRMZM2G009125	2:43708775-43710367	1482	-	0.511202	0.26318	1.88415	1.98725	0.35047	0.32031	0.17122	0.323214		SD609	6
GRMZM2G009144	7:153841606-153842898	978	+	9.59765	23.7794	10.2427	16.8498	6.91685	6.36764	18.8338	13.7153		Shared	13
GRMZM2G009157	8:80197355-80218357	2076	-	0.0289855	0.0894944	0	0.0730968	0.106105	0.108981	0.069838	1.57643		HS68	2
GRMZM2G009163-2	9:125898312-125902473	1683	+	5.50081	5.71245	7.07971	3.56962	8.19794	7.8754	7.58209	4.53793		Shared	16
GRMZM2G009166	7:125118579-125121296	2718	-	0.818667	0.86452	1.46315	1.71151	1.55854	0.675047	0.674479	0.844817		Shared	4
GRMZM2G009188	2:222270784-222275692	1185	+	3.72494	2.1878	6.80761	2.4838	4.90142	1.01729	6.21197	1.94635		Shared	16
GRMZM2G009196	10:24733420-24734316	897	-	6.38579	4.95497	2.2311	2.88883	8.53776	3.22611	3.72907	3.22607		Shared	6
GRMZM2G009208	2:22105481-22108223	1101	+	4.14586	4.2714	5.15288	4.68823	5.17505	2.52101	5.25028	4.16196		HS68	10
GRMZM2G009214	4:41890209-41895204	2091	-	1.66459	1.87465	1.10892	1.58789	1.30896	2.26212	1.89068	1.72389		HS68	4
GRMZM2G009223	7:153821642-153823648	1176	-	23.5528	24.6037	46.6083	9.28082	68.2907	43.5193	52.9369	15.9149		Shared	16
GRMZM2G009253	1:52457620-52463295	820	+	60.9562	39.5675	90.1683	63.583	71.8454	61.472	73.5661	73.7402		SD609	9
GRMZM2G009282	3:22814780-22820246	2981	-	11.9745	13.3421	11.9672	18.5664	6.31157	7.95007	10.0575	8.63617
GRMZM2G009335	9:82283244-82284216	573	-	0	0	0	0	5.83659	0.821382	9.20052	2.94666		HS68	10
GRMZM2G009344	2:187678929-187687963	1092	-	75.2336	103.397	104.726	34.5445	45.7579	40.6489	100.514	35.3947		Shared	2
GRMZM2G009348	4:192661020-192662524	1419	+	0	1.61583	0.0708201	0.113049	0.122925	0.224733	0	0		SD609	5
GRMZM2G009365	5:74506986-74511961	1778	+	12.8612	8.44535	17.7158	15.2471	10.7027	11.8758	9.36331	13.4637		SD609	9
GRMZM2G009368	1:264266368-264273415	5263	+	3.48479	13.9905	1.9715	18.5133	4.0242	7.19653	3.25479	5.12228		Shared	12
GRMZM2G009406	2:188526794-188527528	735	-	1.66526	2.68459	3.53583	2.22961	2.17692	1.4341	2.09997	1.05182	Dof	SD609	1
GRMZM2G009412	7:153816692-153818984	862	+	1270.48	474.745	1500.86	1079.46	1170.64	1046.7	971.997	985.951		SD609	8
GRMZM2G009413	2:3707370-3711157	1356	-	28.5028	21.8217	46.3314	31.64	36.5937	26.2749	19.9312	19.6542		SD609	9
GRMZM2G009426	5:201943249-201945653	1104	+	0.243049	1.62764	0.767916	0.61277	0.0554584	0.0761357	0.293408	0.0768127		SD609	10
GRMZM2G009438	4:192646820-192651379	2235	+	0.371197	0.178025	0.0981565	0.193351	0.112045	0	3.29555	2.24998		HS68	3
GRMZM2G009442	1:267577886-267580271	345	+	0	2.64109	6.4211	2.11826	0.373915	0	3.21725	9.52173		Shared	8
GRMZM2G009443	10:35583165-35590252	3383	+	102.133	70.0157	32.6514	127.398	94.0323	102.642	68.3019	156.989		SD609	12
GRMZM2G009462	3:168436557-168440108	1071	+	0.694224	0.520215	0.149552	0	1.9005	1.97694	1.32079	1.99448		SD609	2
GRMZM2G009465	1:120192963-120194846	1446	+	137.456	1.14914	26.9311	26.3014	40.6805	24.0446	74.1117	41.1266		Shared	6
GRMZM2G009479	5:123202631-123206057	2736	+	38.6071	83.6372	43.3212	13.9494	72.2312	43.7639	33.1165	22.093		Shared	1
GRMZM2G009489	5:74545759-74546329	471	+	0.212417	0	2.68675	0.534871	0	0.265885	1.89922	0		Shared	14
GRMZM2G009506	5:201936914-201940651	1467	+	1.90325	2.11492	2.80851	4.2302	2.05896	3.01259	2.05398	2.46908		SD609	6
GRMZM2G009510	4:192644976-192646355	1263	+	0.0515226	1.32665	0.0406945	0	0.282371	0.645624	0.207202	0.130284		Shared	1
GRMZM2G009530	1:177033302-177034147	846	-	11.5691	16.4351	15.2329	10.153	7.97465	9.02524	13.4722	9.52942	GATA
GRMZM2G009563	4:194214074-194216913	1454	+	11.1892	10.5086	11.606	8.4681	12.8388	10.8569	6.69224	5.83663		HS68	9
GRMZM2G009571	2:216546741-216550072	1897	+	8.5223	8.47029	19.0683	23.6171	15.1797	11.2483	15.3809	13.5771		SD609	6
GRMZM2G009588	1:282005732-282023756	1923	+	0.568541	0.455144	1.8958	1.63287	0.0866983	0.31668	0.456694	0.679116		Shared	4
GRMZM2G009598	1:292102943-292103659	717	-	11.5924	24.2339	13.8063	11.9638	17.2251	13.6713	7.24153	10.1606	ERF	Shared	1
GRMZM2G009626	2:157629867-157639676	2688	-	3.42833	5.73766	4.85383	1.98044	2.74797	1.35265	4.43396	1.46751		Shared	2
GRMZM2G009627	6:2038640-2044366	2163	+	23.2964	12.1081	16.7663	23.0601	27.2177	30.0532	20.9706	17.2372		HS68	9
GRMZM2G009633	9:102401503-102403545	1824	+	0.193168	0.456159	1.06716	1.10897	3.89126	4.91322	1.46445	1.81841		Shared	5
GRMZM2G009638	1:26037366-26151146	1524	+	233.821	129.275	306.428	177.652	268.374	223.598	245.851	236.407		SD609	8
GRMZM2G009681-2	10:57542387-57542746	360	-	9.06569	8.8786	11.6112	6.15589	7.72369	11.3345	5.75362	10.9621
GRMZM2G009681-3	10:57543486-57547637	1314	-	3.82838	4.32329	5.15014	4.37451	7.16696	7.38446	4.0438	3.39277		HS68	9
GRMZM2G009690	1:52464935-52467537	1362	-	0.89426	0.969382	1.33826	0.712056	0.817142	0.943681	1.74088	0.773659		HS68	6
GRMZM2G009715	3:87782842-87788534	3182	-	18.5309	7.33145	6.87116	14.9611	11.7167	14.3565	11.2572	19.1223		SD609	12
GRMZM2G009717	6:157987949-157989187	1239	-	0.0236371	0	0	0	1.89079	0.00023309	0	0		HS68	5
GRMZM2G009719	8:36505969-36507135	744	-	435.695	244.647	227.968	121.795	198.367	154.351	221.142	206.078		SD609	7
GRMZM2G009724	9:110568122-110569216	1095	-	2.03374	4.74115	2.54403	0.153831	4.60027	2.22152	3.45081	0.00274869		Shared	16
GRMZM2G009735	1:226926301-226926627	327	-	36.8573	48.2818	29.959	41.8578	18.1797	13.506	60.631	45.0352		HS68	3
GRMZM2G009795	10:17601862-17606673	564	-	21.7593	41.6043	44.7099	31.1279	28.0067	27.0525	31.4651	18.6368		Shared	2
GRMZM2G009804	7:171207921-171208532	612	-	1.38781	1.45285	0.110047	0.467248	0	0	0.475241	0.203786		SD609	2
GRMZM2G009854	4:12298229-12298540	312	+	17.3608	19.9779	853.505	65.5658	48.1297	11.7905	138.515	0		Shared	14
GRMZM2G009869	9:151572604-151576283	1353	+	0.56644	0.233023	1.25249	0.356457	0.433469	0.638236	0.343331	0.239942		SD609	11
GRMZM2G009888	10:117783336-117785945	723	-	89.0083	135.608	153.92	142.887	75.3436	87.7284	88.9593	156.95
GRMZM2G009892	2:41885730-41887478	1416	-	17.0448	10.5627	10.3965	4.18614	13.4435	9.25933	11.409	7.17525	NAC	Shared	16
GRMZM2G009894	8:36503671-36505442	697	+	159.501	76.7413	108.361	65.2476	94.2173	85.4014	84.5351	113.217		SD609	3
GRMZM2G009895	1:275385306-275388905	782	-	89.7056	55.0937	110.402	80.0408	94.1798	57.4468	72.4979	77.8083		SD609	8
GRMZM2G009901	1:290201800-290202684	885	+	3.06638	3.07811	3.69724	1.52558	2.79403	2.83071	3.18632	2.14151		SD609	11
GRMZM2G009913	5:123897524-123900362	1320	-	3.8692	3.11924	8.01985	1.91446	3.12486	2.02375	3.78136	3.04358		Shared	14
GRMZM2G009936	8:116532991-116534560	527	+	712.344	218.697	869.922	430.715	648.99	552.732	452.693	510.32		SD609	8
GRMZM2G009948	2:42234532-42255952	1388	+	16.9737	36.1646	28.587	15.1887	23.763	16.1347	27.8724	13.0583		Shared	2
GRMZM2G009958	1:280581031-280582891	1053	-	9.14163	27.7862	2.51249	7.55868	1.68076	2.85207	9.74074	6.90841		Shared	13
GRMZM2G009968	8:118324782-118325531	750	-	0.809179	1.04349	0.479469	0.764776	0.460029	0.380111	0.244853	1.15003		HS68	2
GRMZM2G010011	2:14438807-14448385	2073	+	4.84166	9.15542	5.10793	8.09071	4.63693	2.87695	6.90436	2.95271		HS68	10
GRMZM2G010016	8:36484568-36485002	435	+	0.495114	1.02657	1.95738	4.0506	0.889812	0.309796	0.605053	0		SD609	6
GRMZM2G010044	4:238877218-238880889	1518	+	44.581	13.6251	44.3011	44.5928	88.3885	183.939	48.4149	76.1431		Shared	5
GRMZM2G010046	10:117789055-117795999	4884	-	0.161221	0.0414967	1.30682	0.460425	0.665584	0.718708	0.3375	0.479445		SD609	9
GRMZM2G010048	5:14814860-14815602	702	+	9.33792	2.75335	0.614819	4.6225	4.54652	10.5825	7.98867	4.7741		Shared	6
GRMZM2G010052	1:276211575-276219234	2245	-	3.688	5.63087	2.74446	2.78222	4.36628	3.74601	4.60654	5.48252		SD609	2
GRMZM2G010056	4:12043745-12050421	1310	-	13.0245	7.19539	8.67532	6.32957	5.91851	3.95908	13.6173	11.877		Shared	11
GRMZM2G010091	4:240251232-240260901	2579	-	2.28119	2.7699	5.22431	1.9273	1.94252	2.05858	0.121584	0.288558		Shared	4
GRMZM2G010095	10:38575140-38591171	3455	-	4.34339	10.027	5.66404	6.48516	5.00448	4.11902	6.20687	2.07573		Shared	13
GRMZM2G010097	4:235742692-235743234	390	-	2.18465	14.9153	38.0152	3.53194	28.1743	13.2729	12.0013	1.96459		Shared	9
GRMZM2G010105	8:164357685-164363961	3521	-	3.38274	2.27748	5.35709	4.42133	4.13192	4.37405	4.29232	3.06145		SD609	9
GRMZM2G010146	5:14801051-14808952	1321	+	10.031	8.44581	11.3718	10.0928	5.89069	5.32638	5.73132	3.39468		HS68	1
GRMZM2G010149	1:53713653-53714910	576	+	1.65249	3.26036	6.39799	3.2812	1.49708	2.61576	2.35978	3.40259		SD609	1
GRMZM2G010152	4:235734133-235739204	3106	+	10.4623	12.8388	13.6336	9.58256	10.4051	9.42918	17.5307	7.64179		HS68	6
GRMZM2G010156	6:75126659-75160038	1644	+	0.93492	1.20518	5.87366	5.05664	0.820223	1.68094	1.55279	2.48393		Shared	4
GRMZM2G010163	4:240247987-240251053	606	-	13.0309	9.45078	0	0.174639	0	0	14.5775	12.7767		Shared	11
GRMZM2G010196	1:54599076-54604158	1076	+	30.2937	4.25152	11.6318	20.3217	26.7761	20.8382	25.7953	41.1131		SD609	3
GRMZM2G010235	5:164470297-164481528	787	+	9.41363	16.4245	15.208	15.0501	18.3305	19.9606	10.773	16.4951		SD609	10
GRMZM2G010257	2:2545297-2547799	1263	+	105.911	52.375	154.308	67.6947	93.4959	62.8106	87.4622	74.5544		SD609	8
GRMZM2G010286	2:78737864-78766585	1236	-	0	0	0.908939	2.98575	1.10361	3.39029	0	0.146176		Shared	3
GRMZM2G010290	10:137204409-137206460	1263	+	0.532444	1.82844	3.1776	1.78989	0.918064	1.11195	5.43465	2.39582	Dof	Shared	10
GRMZM2G010298	7:151508921-151519075	1514	-	11.0925	22.1255	7.72941	34.5054	6.95807	15.835	7.89963	15.8311		Shared	3
GRMZM2G010302	6:146970558-146979702	1829	+	88.6484	106.902	57.4684	130.96	86.4895	92.2961	82.3337	161.541
GRMZM2G010306	3:197387145-197392045	2472	-	1.93545	1.99161	2.1323	1.14495	1.50948	1.2578	2.57069	2.47841		Shared	16
GRMZM2G010321	5:84934242-84936185	480	+	196.85	94.3622	148.811	126.799	327.13	220.644	139.568	134.565		HS68	9
GRMZM2G010328	1:46852657-46861768	1551	+	161.67	60.9202	82.6898	115.592	153.225	169.953	107.562	181.557		SD609	3
GRMZM2G010338	2:43529513-43531136	1223	+	1.43357	0.827711	2.88102	2.64299	3.27549	2.51761	2.70861	1.84148		Shared	9
GRMZM2G010348	8:103312420-103314864	455	-	106.135	157.315	221.936	139.972	134.484	110.194	111.627	117.546		SD609	1
GRMZM2G010349	6:162373311-162386586	1893	-	6.47805	7.40412	5.02304	5.47906	2.53565	2.29738	5.11822	3.02291		HS68	3
GRMZM2G010351	3:143622690-143624515	1730	+	3.17497	3.01286	3.69592	2.23263	1.73704	1.2413	3.0512	1.20413		Shared	7
GRMZM2G010353	1:286319060-286327541	2477	+	1.1023	0.8301	1.30198	1.28982	0.486249	0.910409	1.68535	0.702327		HS68	6
GRMZM2G010363	2:154601930-154610469	1522	+	3.70812	8.24269	19.2187	5.83686	10.781	12.1226	29.55	4.78664		Shared	10
GRMZM2G010389	7:104752857-104756304	938	+	24.9959	13.6081	18.9464	25.8316	33.4186	19.9391	20.9914	36.1928
GRMZM2G010433	6:113048881-113050494	1200	+	0.061874	1.30542	0.129914	0.76028	0.0500652	0.343501	0.220534	0.0782185		SD609	5
GRMZM2G010435	2:2548997-2552524	1569	+	58.8355	65.1846	36.4408	51.4267	29.2565	44.729	38.3544	34.4719
GRMZM2G010447	3:186215234-186216705	792	+	5.63544	27.5725	41.7061	46.3298	3.53909	4.54247	37.6358	28.9197		Shared	2
GRMZM2G010460	3:1684611-1688199	1554	+	40.1448	41.3478	40.5754	17.2434	11.4908	12.9768	32.834	13.208		Shared	7
GRMZM2G010466	4:240188099-240224429	2400	+	5.34582	3.8622	3.2015	3.38649	3.12752	2.45059	7.60587	4.43455		HS68	3
GRMZM2G010468	8:170446039-170448210	1839	+	5.18341	3.57997	0.645571	0.987885	1.99126	2.65757	2.20455	2.6576		SD609	7
GRMZM2G010474	2:6571095-6572033	939	-	3.35951	2.38549	1.88715	1.41149	3.26686	5.14445	4.93125	6.41612		SD609	7
GRMZM2G010491	4:173989755-173990635	516	+	0.335405	21.3254	107.904	15.7376	43.7288	16.8486	33.3087	0.91053		Shared	14
GRMZM2G010494	2:86650882-86654671	2294	+	2.37083	13.2537	2.86869	29.6771	4.67829	10.3023	3.48863	6.52484		Shared	3
GRMZM2G010545	1:46840606-46843382	1695	-	0.364593	1.05673	1.24132	0.91939	0.73359	1.47104	1.02905	0.829948		SD609	1
GRMZM2G010599	10:106247893-106250671	1908	+	272.127	128.996	335.736	194.912	265.245	230.894	238.685	223.452		SD609	8
GRMZM2G010604	5:14184087-14187588	2081	+	8.85718	7.6811	8.98652	7.08035	6.55474	6.06107	12.3655	5.88633
GRMZM2G010636	5:48214564-48244029	1370	-	7.33402	8.23046	8.8987	8.54635	7.46056	7.73624	4.75356	12.4008		HS68	2
GRMZM2G010664	3:227359669-227361351	1683	-	1.50707	1.66498	2.26437	1.1123	2.82384	2.07295	1.83126	1.25511		Shared	9
GRMZM2G010669	10:30864264-30868654	1248	+	26.0283	41.8572	123.025	47.6699	57.5162	53.0781	86.4645	16.734	MIKC	Shared	14
GRMZM2G010673	5:196761489-196761869	381	+	0.406499	2.09558	0.853778	3.57974	1.60759	0.316901	0.906527	0.0987467		SD609	4
GRMZM2G010740	9:23058609-23071325	2435	-	21.0828	203.023	58.65	246.284	22.5969	24.64	51.0741	53.8929		SD609	4
GRMZM2G010743	4:105098048-105100720	1201	+	29.3601	9.52085	21.5046	15.3376	30.1322	22.5683	30.6734	22.4287		SD609	3
GRMZM2G010745	5:196787217-196790050	1456	+	17.3115	14.1584	11.0591	12.3279	12.662	8.77425	17.5732	33.6659		HS68	8
GRMZM2G010762	3:197406941-197407704	648	-	0.875742	75.3057	75.9191	33.4162	32.2542	22.5634	85.3354	8.68927		Shared	10
GRMZM2G010765	2:77778387-77783030	2236	-	2.02998	7.55796	6.01075	6.4521	5.27395	9.47414	5.70091	3.65791		Shared	12
GRMZM2G010775	3:140409526-140417500	1751	+	12.16	13.1724	11.6038	7.72528	8.31341	6.04084	12.9554	9.15662		Shared	7
GRMZM2G010779	5:77729877-77749560	1993	+	1.03162	0.725157	1.71824	1.00989	1.45648	1.40332	1.74758	1.58853		SD609	9
GRMZM2G010783	2:216607856-216609667	310	+	1724.75	1286.82	2154.73	2363.3	2329.4	1579.14	820.357	1577.88		HS68	5
GRMZM2G010804	3:197416479-197417597	1119	-	0.000492977	0	0.0125865	0	0.0879308	0.465149	0.00868928	1.1775		HS68	2
GRMZM2G010831-2	1:246396581-246399462	279	+	74.2912	42.566	135.21	80.3413	52.2632	77.3014	73.5358	80.6949		SD609	9
GRMZM2G010831-3	1:246399472-246399582	111	+	4866.51	0	76803.9	13775.1	22209.2	2720.77	14647.4	7459.34		SD609	9
GRMZM2G010834	4:65672793-65697001	2847	+	11.0466	11.6284	13.4944	6.79828	10.8617	10.0426	16.6209	6.53212		Shared	10
GRMZM2G010855	1:39139996-39141436	1191	-	15.0696	43.6354	8.539	45.7536	14.2201	44.7143	11.9408	32.2062		Shared	12
GRMZM2G010868	3:230607376-230607829	366	-	88.0915	144.986	100.801	104.268	153.265	146.808	49.1052	84.8315		HS68	9
GRMZM2G010871	1:239615554-239619175	3180	-	73.5398	32.0645	27.2227	19.5483	15.0517	7.65641	27.6382	10.6878	HSF	Shared	6
GRMZM2G010884	9:102440327-102441366	804	-	1.92857	0.284143	2.89046	0.925907	1.75563	0	0.592476	0		Shared	7
GRMZM2G010892	2:7265976-7275284	4202	+	6.84526	7.92575	9.03772	5.94797	1.23332	0.806419	1.42491	1.21064		Shared	2
GRMZM2G010909	1:46737303-46738091	789	-	2.07342	16.2337	22.1881	16.5095	10.2934	10.1536	8.96976	8.45443		SD609	1
GRMZM2G010920	5:77748895-77751977	2294	-	0.293955	0.20776	0.0527425	1.54347	0.893156	3.99872	0.0498984	4.40159	G2-like	Shared	8
GRMZM2G010927	8:121669384-121670947	573	+	5.60516	6.41849	4.42957	1.33577	6.86101	10.2439	2.8208	3.82448		Shared	1
GRMZM2G010936	3:197420426-197420878	453	-	9.1458	0.947548	0.903831	0.287827	0	0	5.02321	8.35927		Shared	11
GRMZM2G010973	5:196797593-196798255	663	+	3.02237	1.87206	8.11948	5.94059	4.9404	4.23976	2.2466	4.4277		SD609	9
GRMZM2G010991	2:216610855-216612039	393	+	462.903	108.659	479.675	211.405	386.501	309.284	300.574	313.627		SD609	8
GRMZM2G011006	5:196801201-196801746	546	-	3.44269	9.66042	0.38869	2.68426	1.03838	4.72123	1.06263	3.72408		Shared	13
GRMZM2G011015	4:163855122-163855757	636	+	2.05908	0.531551	1.42364	0.486411	1.98546	1.12824	2.39271	0.487518		Shared	16
GRMZM2G011025	1:56752956-56783009	885	+	0	0.249585	0.301082	0.359943	0.894803	0.237829	0.57486	6.85719		HS68	2
GRMZM2G011031	8:14071797-14076071	1656	-	15.576	19.0557	19.4241	17.1182	12.81	15.3192	16.9767	8.24507
GRMZM2G011055	3:222820540-222822747	1910	+	0.568204	2.30892	0.980547	1.70579	0.746653	0.94487	0.61496	0.809988		SD609	5
GRMZM2G011071	9:138707444-138709717	963	+	4.07427	16.0019	8.65724	20.5698	12.3279	16.6988	5.16789	16.1731		Shared	12
GRMZM2G011078	1:246407029-246409907	942	-	4.6096	12.657	15.5045	10.3081	7.64959	11.9123	17.1277	13.1552		Shared	10
GRMZM2G011085	4:163638552-163644091	1779	-	266.375	121.553	416.269	232.643	344.413	241.507	242.056	253.194		SD609	8
GRMZM2G011098	5:11390630-11392790	1123	-	124.414	10.9617	386.919	9.11238	1184.64	165.952	97.9661	178.872		Shared	9
GRMZM2G011110	4:178386473-178387261	789	+	0.188493	0.194415	0.372283	1.18773	0.257334	2.0071	0.380075	0.476306	ERF	Shared	5
GRMZM2G011129	7:46478504-46482006	1168	+	59.8719	17.2178	31.3919	40.6863	59.2253	48.5308	39.792	60.8315		SD609	3
GRMZM2G011136	10:13641223-13647883	1971	+	8.3566	61.2475	42.2062	15.2894	29.9579	9.24888	12.8222	18.6979		Shared	13
GRMZM2G011141	10:22747658-22755006	1812	+	0.0337842	0.591189	1.06726	0.383378	0.772634	0.592757	0.407128	0.512727		SD609	1
GRMZM2G011213	8:14068486-14071316	1274	-	99.4177	15.4131	30.919	64.9628	92.8085	73.7089	45.4127	108.659		Shared	8
GRMZM2G011218	4:174052163-174061601	4180	-	0.421559	0.642029	1.46591	1.29235	0.786705	0.793559	0.502708	0.154798		Shared	4
GRMZM2G011222	6:150528246-150533667	758	-	19.0555	16.2703	25.1835	16.7672	14.7083	10.7868	12.5333	12.1178		SD609	11
GRMZM2G011240	1:56761571-56764352	1023	-	4.07918	13.1618	0.581071	3.8775	4.33123	18.4332	25.2301	7.52295		Shared	13
GRMZM2G011269	1:246464081-246475356	2303	+	15.2527	23.5182	27.1437	72.1524	32.2311	28.9027	19.4596	44.3958		Shared	3
GRMZM2G011315	2:220486558-220543611	2774	+	55.9889	39.4363	33.3334	30.8499	46.0846	46.9618	65.1541	39.6529		HS68	6
GRMZM2G011347	3:217657158-217667118	2578	+	16.768	21.9729	10.6255	29.2522	23.1232	38.4958	28.6318	26.4652		SD609	4
GRMZM2G011357	1:239609197-239612156	1311	-	0.0985224	0.152199	2.84028	0.248416	0.85509	0.432107	1.46578	0.0622853	C2H2	Shared	14
GRMZM2G011479	3:170535711-170538815	1216	+	10.5671	4.13571	6.13301	10.3554	22.2733	9.06242	34.7556	14.609		SD609	3
GRMZM2G011523	3:23904336-24096022	692	-	1136.55	2499.51	727.391	1493.5	313.99	626.884	262.198	753.6		Shared	13
GRMZM2G011526	7:94195239-94238663	3442	+	12.3215	8.62569	5.77707	7.92112	4.26051	5.55671	7.35178	5.59064
GRMZM2G011541	3:183999716-184001338	1623	+	0.120713	0.0719961	1.89324	0.910891	0.677317	1.07013	0	0.132551		Shared	4
GRMZM2G011553	3:1677971-1678885	915	-	2.16228	6.05001	3.17216	3.11471	3.23775	3.09605	3.42191	1.65914		Shared	13
GRMZM2G011588	1:256483096-256489441	4253	+	18.5908	21.0592	30.5791	14.89	15.858	11.5758	25.2738	10.5067	TALE	Shared	2
GRMZM2G011590	10:149370410-149391597	2236	+	10.8606	22.2735	13.1025	9.87649	12.0618	12.3365	12.307	11.5227		SD609	5
GRMZM2G011592	3:227189913-227194869	2149	-	27.0189	31.2443	47.1827	55.4526	27.268	29.1146	78.7807	16.6609		Shared	10
GRMZM2G011598	1:53633955-53635801	1122	-	1.72704	5.39912	1.97566	3.52843	2.71802	3.50721	1.77321	1.50572	NAC	Shared	12
GRMZM2G011622	1:162737718-162738104	387	+	4.44657	6.93084	1.50735	1.99666	0.851275	0.794539	3.37945	0.799664		SD609	2
GRMZM2G011624	4:163627021-163627512	492	+	12.9749	12.4772	21.2561	11.825	16.2167	8.34892	19.0048	6.47135		Shared	14
GRMZM2G011631	5:164330196-164361752	7251	+	14.9259	6.16271	19.6276	15.5586	14.3801	18.1288	15.4591	12.5738
GRMZM2G011655	6:55648498-55674133	915	+	5.76889	4.68182	2.26001	5.0838	11.2886	11.3716	5.03476	7.95921		HS68	11
GRMZM2G011662	6:165349813-165352973	978	+	64.4525	45.3734	65.9153	99.9697	38.3016	49.9678	39.4244	47.7991		SD609	6
GRMZM2G011731	3:170545677-170547666	764	+	18.9395	18.1471	23.0308	38.5701	16.3155	21.5211	19.5369	16.8128
GRMZM2G011784	2:169059768-169093894	1655	-	2.83611	0.0385784	0.778646	1.03893	1.71788	0.328843	0.740414	0.270626		Shared	16
GRMZM2G011800	7:5070772-5093642	2955	-	28.8609	26.3418	13.2936	41.7609	26.3988	26.1251	17.5989	40.4674		SD609	4
GRMZM2G011806	4:61717777-61723125	3642	-	1.89736	2.33961	4.10686	2.15287	2.12421	2.3357	3.29841	2.05884
GRMZM2G011858	7:5095302-5100759	1562	-	44.3853	21.0508	52.7228	45.4789	50.6214	43.3976	50.7782	47.8224		SD609	8
GRMZM2G011878	3:230670367-230670777	261	-	22.1875	13.2016	23.5244	13.6841	14.351	6.12293	21.4715	18.3588
GRMZM2G011888	5:81793951-81797035	1044	+	4.56209	3.29062	10.3989	5.33995	5.17317	2.20481	4.87933	3.13052		Shared	14
GRMZM2G011896	4:10031736-10037983	3664	-	4.0861	4.74672	6.34043	2.90337	4.41812	4.14022	5.03061	3.75389		SD609	11
GRMZM2G011919	4:188519487-188520809	1323	-	0.0974531	0	0.346369	1.04432	0.0890366	0	0.470212	2.526		Shared	8
GRMZM2G011932	6:165342826-165348175	2400	+	18.3122	16.37	6.02934	23.0707	19.5445	17.9969	10.664	36.3447	bZIP	Shared	8
GRMZM2G011951	5:204322903-204325676	681	-	0	0.239879	0.275437	0.439244	0.211131	0.582184	2.79779	1.21086		HS68	3
GRMZM2G011968	4:97866410-97866868	318	-	0	0	8.90335	4.68972	0	0.668591	2.66772	14.7755		Shared	8
GRMZM2G011998	5:65123089-65125845	2757	-	2.98073	0.862117	0.000144178	3.98632	2.65827	3.40182	1.05076	2.22964		Shared	5
GRMZM2G012021	6:139976050-139980340	2191	+	4.20176	10.2947	9.918	12.4491	8.95294	13.0751	10.6626	8.40109		SD609	4
GRMZM2G012031	7:5107312-5127950	5614	+	43.9089	44.6982	36.3299	43.7112	46.7877	33.7924	55.187	74.8793		HS68	8
GRMZM2G012046	5:160655640-160661216	1842	+	40.7186	36.9961	12.1021	32.8664	27.8934	32.5568	15.2634	49.3047		Shared	8
GRMZM2G012071	1:246539685-246541235	1551	+	9.28937	3.49038	4.77726	9.27541	16.6155	6.23191	5.34894	6.62026		Shared	5
GRMZM2G012119	1:246546734-246549006	1769	+	1.19481	1.4843	12.7414	16.9071	2.28978	2.74879	7.45143	9.22462		Shared	4
GRMZM2G012140	9:126718167-126723216	1987	-	1.4613	3.44669	2.31551	1.91931	3.38474	2.59445	1.10036	0.341227		Shared	9
GRMZM2G012143	4:237032853-237039445	2252	-	1.55338	4.0119	8.06909	4.81536	1.97883	2.49711	3.68963	0.989462		Shared	2
GRMZM2G012148	2:117919056-117919712	657	-	0.367635	0.379542	3.00166	0.1544	3.78317	0.460455	5.94131	0.154759		Shared	10
GRMZM2G012160	8:171408425-171414490	1247	-	95.674	83.8618	82.9596	77.9305	58.4282	69.8513	46.9844	46.1597
GRMZM2G012174	3:200756740-200761808	3231	-	4.30122	4.03339	4.79995	4.29153	5.78115	2.98476	1.72436	2.9846		HS68	5
GRMZM2G012183	7:163597008-163597904	897	-	0.237808	0.163439	0.626194	0.199822	0.505663	0.595877	1.08584	0.500891
GRMZM2G012209-2	5:39870736-39881944	1733	+	90.4755	75.7478	78.6115	83.5858	65.5095	80.1841	197.535	74.5416		HS68	6
GRMZM2G012220	6:139998353-140038038	1790	-	6.57751	6.05972	11.3315	9.53058	6.92955	5.68231	6.70533	5.49126		SD609	9
GRMZM2G012224	1:290521888-290523637	1173	+	55.5577	21.6613	106.333	18.9042	40.5093	26.8434	75.2482	25.8925		Shared	7
GRMZM2G012229	5:1060938-1063538	1233	-	13.89	21.795	105.805	70.5372	41.8725	15.2087	13.6937	46.3638
GRMZM2G012233	3:208890160-208890546	387	+	1.73661	3.96047	5.35909	3.35013	2.34058	2.78244	1.03998	3.99828		SD609	1
GRMZM2G012262	4:237029789-237034004	1435	+	44.0583	25.8786	34.5243	36.7569	21.3599	27.2817	33.0483	35.568	Whirly
GRMZM2G012269	5:207999806-208029702	802	-	14.8516	7.87369	8.89808	14.6944	7.73778	8.3669	12.8896	3.3412		HS68	6
GRMZM2G012306	1:106896081-106898436	2083	+	3.75571	7.7206	6.13579	4.62222	8.54893	8.75381	2.71271	4.05035		Shared	5
GRMZM2G012340	4:233085627-233086961	618	+	1.13528	0.586395	0.850099	3.40176	1.2198	1.42173	2.28369	5.26354		Shared	8
GRMZM2G012342	9:96225502-96226134	309	+	4.11564	11.0972	5.12306	7.34909	6.16599	4.40377	1.47005	4.42165		HS68	5
GRMZM2G012393	4:233068521-233069804	1284	-	5.65264	3.24008	0.000729229	0.000470855	2.1682	5.10956	2.63521	5.12491		Shared	6
GRMZM2G012397	7:5129425-5129920	405	+	3.73284	3.87496	2.95211	0	3.8577	0	1.87636	0		Shared	7
GRMZM2G012404	2:42356960-42358450	1491	+	5.09659	1.75217	6.23508	4.50464	8.04042	8.41617	7.08753	7.66479		SD609	8
GRMZM2G012413	7:147380210-147382701	1446	+	4.34099	4.96655	6.51076	9.45332	4.72919	5.54983	7.33207	9.0932		SD609	6
GRMZM2G012434	1:106843505-106847022	1995	+	24.5603	63.7527	22.0416	36.0715	21.8855	26.4105	25.4149	25.6418		SD609	5
GRMZM2G012453	1:193042132-193045617	3486	+	22.2835	22.7887	9.42324	14.5492	12.9855	14.5847	14.8533	21.4345		SD609	2
GRMZM2G012455	9:132219348-132219830	483	+	108.712	9.65774	10.5816	6.38434	5.12207	5.58558	5.76634	9.97629		SD609	7
GRMZM2G012472	3:28055973-28058891	675	-	0	0	1.76732	0.741662	0.427745	0.147453	0	0		SD609	9
GRMZM2G012479	6:106959590-106970264	1291	+	5.66503	11.1376	10.6456	11.8603	8.76919	8.94735	7.17023	5.63044		Shared	4
GRMZM2G012546	2:234104800-234105828	1029	+	0.0663772	0.478796	0.419452	0.502023	0.847764	1.58019	0.587838	0.419516		HS68	11
GRMZM2G012566-2	1:38548677-38549195	519	-	1.60756	1.84746	1.28118	0.224978	2.43214	2.47065	1.01403	0.450748		Shared	1
GRMZM2G012566-3	1:38549739-38550554	498	-	25.1493	72.9069	4.55245	13.296	13.6914	36.0505	5.61006	14.5303		Shared	1
GRMZM2G012601	8:44551757-44555875	1935	-	24.4866	18.1876	15.5599	14.8444	13.252	12.06	14.6244	14.8372
GRMZM2G012631	4:198370246-198374123	2136	-	610.237	270.911	426.916	213.076	379.934	205.843	394.196	204.628		Shared	7
GRMZM2G012636	7:147384223-147384672	450	-	0.231594	1.91972	0	0.291532	0.208384	1.7391	0	2.91954		Shared	8
GRMZM2G012690	5:163209208-163228554	1676	+	100.926	55.7772	68.3093	46.2536	23.3754	16.2491	81.7338	72.9992		Shared	11
GRMZM2G012724	6:141413442-141415139	1470	-	1.51626	2.49344	1.27629	2.37659	1.74679	3.53191	0.758669	2.47098	WRKY	HS68	7
GRMZM2G012758	1:30751996-30753360	1131	+	10.1423	5.40658	7.40557	11.3731	3.98324	4.87652	7.68701	10.1381		HS68	8
GRMZM2G012806	6:39088258-39092926	724	+	1717.79	1863.13	140.371	1441.69	482.934	1601.51	1188.33	1370.15		Shared	11
GRMZM2G012814	4:163779059-163781248	942	+	9.57068	12.3688	7.68042	8.92369	4.78902	5.78879	7.1006	10.7771		HS68	2
GRMZM2G012821	4:7616949-7618343	1395	+	2.42461	1.50748	1.62593	1.21119	2.09035	1.77716	2.46436	2.7766		SD609	3
GRMZM2G012863	9:11216951-11220902	1723	+	77.1923	42.1993	69.4195	76.2183	120.6	93.1724	80.9202	89.6551
GRMZM2G012874	8:131689281-131694133	1098	-	11.3176	6.87017	23.5483	9.09992	12.3394	8.0487	14.2485	7.19221		Shared	14
GRMZM2G012891	7:137824255-137825568	1053	+	45.9247	71.8607	15.1254	58.1582	17.2111	28.3992	22.8667	32.3539		SD609	4
GRMZM2G012904	5:108470452-108471795	1116	-	1.19902	0.247056	1.79944	1.96492	1.64165	1.87799	0.627196	0.909456		Shared	15
GRMZM2G012966-2	8:138882817-138886391	1614	+	0.270017	0.0794247	1.1272	0.92406	0.634907	0.483408	0.650988	0.390247		SD609	9
GRMZM2G012966-3	8:138887022-138889626	2268	+	0	2.8881	0.199207	2.58415	0.086545	0.237091	0.0506531	0.119632		SD609	4
GRMZM2G012970	9:130918551-130920445	1638	+	2.69248	4.41159	3.59402	1.53003	3.36382	3.3267	4.69306	2.15808		Shared	10
GRMZM2G013002	9:116241623-116244769	2107	-	158.96	150.534	98.8684	150.332	120.803	121.617	108.592	317.953		HS68	2
GRMZM2G013010	3:2768652-2770764	1642	-	2.63117	2.72529	2.6938	0.686282	0.518727	0.695881	0.439117	0.765262		SD609	2
GRMZM2G013016	3:166151703-166153319	1617	-	1.00077	0.554779	0.151998	1.06767	0.211183	0.820032	0.123731	1.99573	GRAS	Shared	8
GRMZM2G013038	9:22952158-22952334	177	-	950.169	416.409	2583.47	1357.68	1288.65	363.636	1401.39	216.488		Shared	14
GRMZM2G013079	4:122185555-122192193	1954	-	11.9204	7.95458	16.5688	13.1196	14.3974	10.971	13.6741	10.7102		SD609	9
GRMZM2G013082	5:26443798-26445592	1635	+	0.190012	0.156493	0.990447	0.191658	0.938297	0.190499	1.61857	0.288352		Shared	10
GRMZM2G013128	4:190443453-190446369	2517	+	0.140562	0.265169	0.074204	0.415132	0.128696	0.0883502	1.16611	2.1336		Shared	8
GRMZM2G013152	6:5508646-5510935	888	-	3.615	9.607	11.2324	9.61883	8.27166	11.8761	6.92659	7.71559		SD609	1
GRMZM2G013176	3:21552403-21554748	2346	+	7.3902	4.42755	8.67439	11.7442	11.6307	12.4977	8.04738	11.9088		SD609	6
GRMZM2G013201	3:1611232-1614090	802	-	40.4755	115.117	25.1102	33.3118	73.9548	56.9357	55.0054	47.831		SD609	5
GRMZM2G013214	4:79443813-79445078	309	+	51.1515	45.6217	13.972	41.8898	33.3991	44.0377	62.7222	45.6903		SD609	12
GRMZM2G013236	7:5145428-5149926	2039	-	62.4724	54.2753	56.9573	114.054	79.3713	171.174	67.3315	127.372		HS68	7
GRMZM2G013248	1:284805717-284806043	327	-	0	0	0	2.15645	3.49532	7.38242	0.45513	1.74568		HS68	11
GRMZM2G013255	7:140894581-140896528	1778	-	3.58027	4.32054	12.399	4.33961	10.3296	12.0895	11.1305	6.00679		Shared	15
GRMZM2G013264	10:130235177-130240815	1347	+	1.43074	1.57164	2.40635	3.0714	2.98378	1.14137	0.575239	2.59298		HS68	5
GRMZM2G013271	4:190375684-190376610	927	-	0.0759182	1.25209	0.299855	1.14828	0.276813	0.570698	0.0611591	0		Shared	12
GRMZM2G013283	2:50455156-50516044	5018	+	3.55791	2.97414	6.6898	5.07095	9.66892	7.64979	8.06439	5.40115		Shared	9
GRMZM2G013302	4:190336462-190337622	1161	+	0.799287	0.941009	2.02926	1.87126	1.72011	0.93	1.28622	1.5879		SD609	6
GRMZM2G013324	5:179010303-179015556	2798	+	93.5659	30.6873	78.5923	56.4319	92.8137	63.91	71.7855	80.1176		SD609	3
GRMZM2G013342	1:290448410-290449009	600	+	1.68961	1.59995	4.00549	4.78911	1.40416	6.52415	1.93646	7.46596		Shared	8
GRMZM2G013349	9:146779401-146784195	2338	+	8.71856	18.0559	8.96427	11.1845	9.52078	16.395	12.3313	11.833		SD609	5
GRMZM2G013357	2:86246642-86252545	2959	-	9.78008	4.80902	6.19196	4.77336	6.29698	5.99874	5.25951	8.85558		SD609	3
GRMZM2G013398	9:38572884-38578606	3324	-	8.23813	10.7085	4.51951	10.1468	13.0083	13.1229	8.39938	9.32526	CO-like
GRMZM2G013430	1:24051077-24052021	945	+	0.814442	1.83156	2.28099	2.42642	1.75505	3.06123	2.56447	1.49724		Shared	15
GRMZM2G013448	8:138860976-138862715	1434	+	12.5976	48.4285	74.8316	9.14193	44.058	14.5022	104.341	17.5217		Shared	10
GRMZM2G013450	8:129119372-129137929	1448	-	8.51307	6.08922	7.6456	11.2961	8.52315	6.67013	7.33437	13.9111
GRMZM2G013461	8:3347739-3350228	859	+	139.745	332.632	235.323	315.692	176.265	255.142	215.487	165.507		SD609	4
GRMZM2G013463	3:180570383-180570757	375	-	5.12687	5.33179	13.2489	9.87878	3.96179	5.55672	5.32375	12.9031		Shared	4
GRMZM2G013465	8:66473516-66475253	1515	+	5.4387	6.62568	7.88865	4.81565	7.17335	5.15369	9.31047	3.36		Shared	10
GRMZM2G013478	10:23245988-23251550	894	-	37.2711	23.9403	33.6689	39.5072	64.6773	54.9741	39.5808	53.1611
GRMZM2G013524	5:72220262-72222318	1853	+	1.18575	0.440741	0.494238	0.581421	1.05465	1.3622	0.687961	0.833135		SD609	3
GRMZM2G013546	4:17375302-17376285	984	-	1.61629	0.651814	0.999186	0.531474	0.320441	0.264143	1.13182	0.888225		Shared	7
GRMZM2G013563	1:260006715-260007467	753	-	1.81046	0.415051	0.953565	0.380248	1.92139	1.00796	1.37968	1.77893		SD609	3
GRMZM2G013581	6:34825148-34826626	1235	+	0	1.85969	1.1036	1.3348	0.0967035	0	0.538987	0	MYB	Shared	13
GRMZM2G013634	1:4038385-4040380	965	-	17.1255	14.46	40.6293	40.4555	30.981	33.1296	20.1655	40.9853		SD609	6
GRMZM2G013639	1:49814509-49819162	1688	-	9.83335	15.0158	14.6562	7.20367	16.9237	13.7551	13.7909	10.2625		SD609	10
GRMZM2G013650	1:143873171-143883847	2177	-	0.442978	0.698563	1.29366	0.780339	0.763577	1.15157	0.638106	0.272775		SD609	1
GRMZM2G013652	7:169267439-169269231	640	+	144.363	91.9445	240.818	86.4271	114.133	74.7415	183.939	102.889		SD609	11
GRMZM2G013677	6:141466426-141472585	2094	-	22.1019	9.48837	34.4075	24.1604	35.336	19.4273	16.9384	20.0556		HS68	5
GRMZM2G013761	4:21698480-21703339	1389	+	1.8207	0.127442	1.2499	0.698225	0.640066	0.508679	6.61069	6.89985		Shared	11
GRMZM2G013767	2:141144024-141178980	3092	-	1.61096	1.24198	3.69853	2.41842	2.25438	1.85915	3.27788	1.74451		SD609	9
GRMZM2G013777	2:200803867-200807734	1371	-	1.62125	1.77934	3.76214	4.88665	3.15782	2.7107	1.6697	3.36575		SD609	6
GRMZM2G013783	1:48685026-48693642	2230	-	1.99951	4.00441	2.46678	2.79142	1.56507	1.63338	1.57111	3.01954		SD609	5
GRMZM2G013798	6:160772257-160773117	861	-	0.334813	0.172606	1.05798	0.210991	0.610001	0.104868	0.539719	0.634644		SD609	9
GRMZM2G013811	7:167230703-167242998	2300	+	36.5728	18.3034	13.7016	31.1256	31.8489	36.1043	30.7597	38.4804		SD609	12
GRMZM2G013853	1:49772947-49813285	6467	-	6.91931	6.62359	3.63255	4.78368	2.97009	2.30329	2.43876	2.57465
GRMZM2G013920	7:22361896-22362387	492	-	0	2.23328	0.155067	0.247018	0.177034	0	0.159284	0.247446		SD609	5
GRMZM2G013936	2:155851643-155904966	4796	-	20.1335	25.5263	11.6377	17.6887	14.8617	22.4101	17.4904	14.3056		SD609	2
GRMZM2G013957	1:48657955-48660871	737	-	73.1047	137.439	27.5734	88.2581	66.3367	95.4245	48.1306	229.56		Shared	8
GRMZM2G013970	6:156748187-156749908	596	+	5.43051	5.90572	8.36241	10.6166	5.18164	11.191	7.80332	5.7677		HS68	4
GRMZM2G013986	1:4053025-4055271	2247	-	35.7274	23.2185	42.5322	32.0975	39.1171	37.6249	44.4197	47.9432		SD609	8
GRMZM2G013987	1:89776199-89830354	873	+	35.6623	36.8527	14.9948	34.3839	35.71	21.2069	35.4296	40.9132		SD609	12
GRMZM2G014004	4:196513494-196545503	2027	-	29.1154	27.0245	23.2759	15.353	34.1351	35.7061	35.3644	32.4571		SD609	2
GRMZM2G014009	2:14331381-14332732	474	+	3.38656	4.20995	15.8595	7.95803	5.48754	3.10831	16.8841	3.13104		Shared	10
GRMZM2G014022	10:114509612-114510538	927	-	0.303673	1.4086	0.299855	0.861207	0.484422	0.380466	0.305796	0.57569		SD609	5
GRMZM2G014043	10:148730983-148732845	1863	+	1.01485	0.640241	0.594652	0.536611	0.778705	0.77953	1.36754	0.910883
GRMZM2G014055	6:14199783-14200576	360	-	0.377736	1.17992	21.2205	1.89725	6.17817	0.47227	1.24163	0		Shared	14
GRMZM2G014069	4:51471743-51477286	2533	-	141.825	60.9484	104.945	102.483	94.1485	53.627	78.5314	77.3451		SD609	3
GRMZM2G014071	4:211593647-211597831	2311	+	5.75617	5.16465	9.14596	5.18666	4.87478	6.15256	7.05396	3.83405		Shared	14
GRMZM2G014076	9:16717180-16721360	2044	+	14.8854	8.2697	16.6886	13.4306	14.4585	11.8129	10.0513	8.62435		SD609	8
GRMZM2G014091	8:24411475-24430777	814	-	121.241	84.1445	231.943	162.402	159.252	168.642	93.0389	106.129		SD609	9
GRMZM2G014119	6:95841224-95843396	683	-	152.657	48.4767	106.271	88.1639	132.296	102.47	137.196	166.144		SD609	3
GRMZM2G014187	2:14335818-14338260	1125	+	0.593564	0.693799	1.40652	0.823074	0.618608	0.52065	1.76157	0.52526		Shared	10
GRMZM2G014276	2:13346095-13352279	3222	+	5.64659	6.90991	15.5614	13.9083	13.6431	19.0668	6.23589	13.0961		Shared	15
GRMZM2G014300	6:143306999-143310056	765	-	64.8463	45.6089	96.2887	55.2245	46.7106	45.7401	68.9819	60.4523		SD609	8
GRMZM2G014303	6:161126445-161130312	2046	+	0.864489	0.75809	0.672311	1.16582	0.727844	1.49274	0.95027	1.37345		HS68	7
GRMZM2G014366	1:6364455-6368019	1545	+	10.0155	6.06762	9.64666	8.40033	11.1027	11.2552	14.5389	19.305
GRMZM2G014382	1:4062071-4069839	596	-	343.844	182.117	341.279	220.813	369.098	297.169	356.57	277.68		SD609	8
GRMZM2G014392	1:250893146-250894960	1815	-	0.944182	2.70742	0.399471	0.850352	1.11051	0.802946	1.35454	1.06618		SD609	5
GRMZM2G014395	3:216875989-217098973	1860	-	8.63229	11.582	15.9948	17.0936	12.6636	31.0958	11.8965	40.2184		Shared	8
GRMZM2G014409	4:211650073-211650921	849	+	0.0852935	2.11073	0.0673804	0.537491	0.310752	0	0	0.323342		SD609	5
GRMZM2G014419	1:37664175-37665952	1638	-	7.64595	13.5684	11.7841	15.4812	10.685	12.7196	17.0376	17.7463		SD609	4
GRMZM2G014444	5:146886807-146888490	813	-	254.855	132.004	412.124	207.106	249.962	247.607	184.397	197.072		SD609	8
GRMZM2G014499	3:201227926-201232092	2421	+	0.342265	0.477988	2.22027	0.832343	0.738601	0.919217	0.333692	0.463855		Shared	4
GRMZM2G014526	2:190828963-190831749	2467	-	0.837454	1.14311	2.53795	1.32195	1.27307	1.0458	0.833102	1.10358		SD609	9
GRMZM2G014610	3:230179283-230180584	1014	+	2.23169	0.975663	2.45728	1.02294	1.72727	0.762601	1.19791	0.769331		SD609	8
GRMZM2G014653	3:170821096-170822520	888	-	41.2889	72.3007	24.2438	82.7484	54.5767	89.2655	39.2912	75.9446	NAC	Shared	5
GRMZM2G014672	5:7594579-7595461	753	-	4.92846	6.74459	3.17855	4.56298	1.8299	2.01591	2.84051	2.54133
GRMZM2G014676	1:229567484-229571333	860	+	76.9365	42.3401	100.897	67.4192	75.8053	44.3527	62.7617	65.6147		SD609	8
GRMZM2G014695	2:62376458-62378810	1118	-	8.23625	6.92612	0.160327	0.510747	0.574498	0	0.337169	0.766558		Shared	6
GRMZM2G014705	6:70571496-70572605	780	-	2848.1	2967.26	1240.65	2476.13	2415.06	2370.55	1752.78	3132.36		SD609	12
GRMZM2G014709	1:175892880-175900809	4803	-	12.6223	10.4729	11.2548	17.1834	11.1876	9.09585	9.94576	18.3822		HS68	2
GRMZM2G014729	7:166856399-166860821	1869	-	4.371	11.4723	16.4444	14.6481	12.9887	15.6506	16.0914	6.37999		Shared	15
GRMZM2G014750	5:183319338-183327606	1923	-	49.4937	28.6517	61.3157	46.3629	54.3845	56.6863	50.1243	45.1833		SD609	8
GRMZM2G014770	3:201255870-201259206	1599	-	0.347903	1.99843	0.270867	2.84158	0.134279	0.798804	0.236391	0.12389		Shared	12
GRMZM2G014797	3:65660170-65663889	321	-	8.23128	23.3548	13.5063	19.1076	13.3597	68.2584	8.33029	9.58023		Shared	5
GRMZM2G014813	5:42530889-42536732	1860	-	3.62004	8.00634	3.68665	6.45281	3.49965	2.36206	2.66865	1.80913		SD609	5
GRMZM2G014826	5:155525290-155529126	2467	-	50.1075	51.8425	44.5194	60.0685	37.236	26.6379	33.9673	35.1376
GRMZM2G014836	3:229636751-229637539	789	-	5.70188	2.46912	2.88399	2.79855	2.14276	3.55654	2.91261	3.2647		SD609	3
GRMZM2G014854	4:167076561-167076959	399	+	39.1724	37.8388	36.8581	54.7045	45.0084	27.8799	13.27	36.9919		HS68	5
GRMZM2G014872	1:139596394-139599515	2623	+	5.33102	5.67687	6.08668	2.65471	6.99381	5.46139	5.97714	5.2529		SD609	11
GRMZM2G014902	4:32497931-32531297	3513	+	17.9239	9.38895	43.5456	21.5425	16.0672	10.7973	25.1197	10.9493	MYB_related	Shared	14
GRMZM2G014914	7:41420512-41540589	1239	-	746.214	427.12	392.388	1138.77	532.346	948.669	436.674	1000.3		SD609	4
GRMZM2G014951	1:260655402-260656172	771	-	0.291932	0.301135	0.922545	1.10369	0.61981	0.731404	0.235506	0.245884
GRMZM2G014955	1:278665701-278667029	1329	+	1.26538	2.85647	2.96172	3.15706	0.801608	1.4524	3.45172	3.11594		Shared	3
GRMZM2G014975	4:28027090-28028349	476	-	217.41	345.311	138.22	379.412	168.238	331.42	144.139	430.821		Shared	8
GRMZM2G014981	6:156920895-156926198	1908	+	3.65294	8.6265	1.857	10.4861	3.31874	6.31706	4.22305	5.92766		SD609	4
GRMZM2G015005	1:251612048-251620232	1534	+	9.94488	12.9065	7.81117	5.92588	7.81561	6.81998	10.6634	8.69763		SD609	2
GRMZM2G015011	7:76949848-76951806	699	+	11.7818	17.0657	19.9939	14.8591	16.5547	16.4426	15.9279	7.7813		Shared	15
GRMZM2G015021	4:175336604-175338808	1191	-	0.0553327	1.08295	2.31635	0.627795	0.505258	0.41601	1.06838	0.0699551	MYB	Shared	2
GRMZM2G015033	5:107135023-107146037	1130	+	43.7446	16.8536	23.6541	37.0708	43.9779	32.1641	25.2434	57.4457		SD609	3
GRMZM2G015040	9:91102706-91104187	849	+	3.21091	3.41521	5.29359	4.42972	4.32577	2.4009	5.79951	2.34278		Shared	10
GRMZM2G015080	2:150143795-150146926	2037	-	2.36859	2.98567	3.13315	2.8372	4.19947	2.93133	1.78344	0.898721	GRAS	HS68	9
GRMZM2G015090	5:216546417-216551626	2023	-	11.7681	27.0433	13.7405	23.1308	13.532	7.55563	9.95891	9.38017		SD609	5
GRMZM2G015126	8:83916840-83921395	2350	+	11.6113	10.1802	12.0938	9.13406	8.54288	6.07757	10.2705	5.94221		HS68	10
GRMZM2G015132	5:155530966-155538382	2350	-	39.6752	20.9415	51.5766	26.9836	46.409	33.441	42.9431	37.5541		SD609	8
GRMZM2G015143	1:117702151-117715139	3439	-	2.27779	5.04845	3.94691	5.50234	1.588	4.0838	3.58735	3.31066		Shared	12
GRMZM2G015159-2	5:14340132-14344987	1001	-	71.4989	80.7653	70.8389	152.465	79.4573	85.4179	61.3727	107.773		SD609	4
GRMZM2G015190	4:103952900-104044910	4055	-	5.88573	3.686	1.88867	2.11653	5.16709	6.03824	5.27681	3.79673		SD609	7
GRMZM2G015200	5:94753590-94756914	1363	+	9.54177	12.7522	14.8277	11.5744	7.82111	7.7454	17.663	9.69554		Shared	10
GRMZM2G015212	6:91994736-91995131	396	-	1.23609	0.783444	2.75013	1.16126	3.35156	1.162	0.308969	0.197999		HS68	5
GRMZM2G015281	1:37716935-37717642	708	+	1.86671	0.793204	0.433783	2.07547	4.09219	6.05186	0.531928	2.49661	ERF	Shared	5
GRMZM2G015285	2:228121670-228123143	1252	+	4.15469	1.27319	4.69102	1.8825	2.1631	1.86501	2.15893	1.08397		Shared	7
GRMZM2G015291	10:99722837-99759406	5477	+	10.7469	16.2129	13.1151	10.6105	12.7121	7.89781	14.5368	10.8908		HS68	10
GRMZM2G015295	4:21135994-21138787	1799	+	796.972	361.364	867.544	490.069	789.251	707.413	890.469	533.764		Shared	16
GRMZM2G015314	6:27029412-27030581	864	-	0.0833149	3.26425	7.04238	2.83517	2.58055	0.417513	5.10342	0.842271		Shared	14
GRMZM2G015324	9:114457108-114462035	1562	-	33.0879	25.4634	42.5942	1177.17	26.7612	16.2126	35.7935	16.6068		Shared	3
GRMZM2G015333	5:163860616-163861191	576	+	0	3.25988	39.0575	6.81229	10.7509	12.98	41.4681	0.379256		Shared	10
GRMZM2G015364	3:226172821-226176126	1668	+	1.09845	1.48057	18.3821	15.8268	23.4773	13.5458	2.18861	6.34582		Shared	9
GRMZM2G015395	2:195109889-195114046	2777	-	0.183851	1.2954	0.0332433	0.812227	0.134923	1.31013	0.0337911	1.47923		Shared	8
GRMZM2G015401	5:210146108-210174620	1910	-	60.1064	32.0184	64.4815	42.3649	65.6553	50.2452	62.899	58.205		SD609	8
GRMZM2G015419	4:233625882-233629239	2718	+	4.27253	5.99097	16.9195	8.68168	10.9244	4.94027	8.8101	2.29134		Shared	14
GRMZM2G015432	6:121718409-121723340	2614	-	14.8855	42.7382	3.17592	2.43587	7.76357	4.60251	14.1424	13.4886		SD609	2
GRMZM2G015433	8:124951085-124951861	690	-	0.113988	0.117647	0.810565	0	1.03575	0.142776	1.28879	0.143973	WRKY	Shared	10
GRMZM2G015436	1:288165800-288266127	1287	-	977.726	746.249	25.6605	29.7964	248.961	20.531	813.612	218.961		Shared	11
GRMZM2G015441	5:160093191-160123117	864	-	0.33326	0.171803	2.30358	0.210013	0.683086	0.208757	0.1343	0		Shared	14
GRMZM2G015534	7:10793343-10796250	1754	+	333.468	210	82.8975	357.725	226.676	306.136	127.63	318.161	bZIP	Shared	8
GRMZM2G015578	5:77254885-77258646	1080	+	6.14988	7.43094	9.79525	3.87988	11.1766	6.87015	6.96976	3.86054		Shared	16
GRMZM2G015592	3:229657602-229665549	2233	-	13.6431	13.2157	23.0485	19.8644	9.90925	8.92466	16.6953	16.5529		Shared	14
GRMZM2G015648	9:149425942-149430307	2031	+	0.148523	1.2229	1.6656	1.76039	1.79406	1.89864	1.12133	0.751406		Shared	15
GRMZM2G015666	2:187816653-187818056	1002	+	0.274645	7.71267	0.867782	7.87588	1.56566	6.36612	2.1009	1.9961	bHLH	Shared	12
GRMZM2G015692	8:76522705-76529922	2792	-	0.908231	2.414	0.886078	1.21464	0.421929	0.49025	0.856654	0.386424		Shared	13
GRMZM2G015727	2:32521945-32523744	1800	-	2.44386	3.22366	2.28513	2.44647	1.58809	2.90093	3.71563	2.8285		HS68	3
GRMZM2G015735	8:141596987-141600198	2588	+	11.0238	11.0469	12.1314	10.3643	7.65663	8.9254	10.8829	5.60779		HS68	6
GRMZM2G015739	7:2618060-2620075	570	+	3.20838	11.6836	6.27836	14.241	4.98142	20.088	1.60807	9.64233		Shared	5
GRMZM2G015767	1:112726810-112734561	2242	-	0.250022	5.23155	2.65295	4.3257	0.34223	1.25734	1.63892	1.13336		Shared	12
GRMZM2G015788	3:8337286-8342491	1077	-	0.0487347	20.8287	0.013418	3.42414	7.81715	7.13457	0	0		Shared	1
GRMZM2G015793	6:3314726-3316195	1470	+	0.129025	1.6828	0.271744	0.759133	0.393128	0.646756	0.242011	0.10877		Shared	13
GRMZM2G015804	1:25704472-25711914	2132	-	15.8865	12.4033	27.6963	104.897	46.4767	86.0346	8.23433	53.4277		Shared	5
GRMZM2G015818	3:8345825-8346760	721	-	11.125	12.6935	20.3683	24.2432	13.8104	10.9875	11.2255	14.5948		SD609	6
GRMZM2G015844	2:44379251-44382590	1779	+	1.03494	1.66904	2.72454	2.87083	2.14584	1.90231	2.27277	2.13785		SD609	6
GRMZM2G015869	10:12921216-12927835	1320	-	19.6919	27.3759	41.2	24.9271	48.0224	48.9407	28.1569	22.5082		Shared	15
GRMZM2G015886	10:22262131-22265986	3654	+	5.4553	3.75749	7.48942	2.68853	4.85444	3.47777	6.93117	4.3233		Shared	7
GRMZM2G015889	2:66745340-66750241	1922	-	13.3246	19.2914	9.79379	19.3471	9.56929	13.0972	11.4758	14.1274
GRMZM2G015908	3:202182610-202183440	831	-	14.6619	8.51025	2.70496	1.43844	1.99875	3.07967	20.0314	11.3157		Shared	11
GRMZM2G015923	3:167711919-167714211	1319	-	2.35507	2.13084	2.723	2.17312	3.30394	2.37587	0.601007	0.726382		HS68	9
GRMZM2G015941	4:178665049-178666654	1241	+	1.37599	0.942147	2.415	1.35361	1.3395	0.981292	3.32207	1.35231		Shared	10
GRMZM2G015955	6:132259759-132262492	1770	-	182.176	96.8777	111.552	102.054	55.7669	45.2612	110.306	70.4911		HS68	3
GRMZM2G015972	5:146917971-146921155	960	-	7.54464	4.03758	4.41249	6.4008	7.73916	13.9973	7.85336	9.62742
GRMZM2G015976	4:21669618-21672649	882	-	4.2961	23.9842	3.4578	6.12986	3.84056	6.19473	2.61288	7.17053		Shared	13
GRMZM2G015983	4:178671700-178675412	2366	+	25.1471	20.9462	26.8621	14.5096	34.0614	23.6156	24.2958	14.933		Shared	16
GRMZM2G015989	4:240743452-240747992	2389	-	318.81	114.265	253.438	154.893	316.778	177.043	283.056	209.644		SD609	3
GRMZM2G016066	2:169557614-169558294	420	-	0.531768	0.275811	3.24317	0	1.05232	0	1.08439	0		SD609	9
GRMZM2G016084	1:297747984-297750787	1113	-	4.76534	5.95166	5.70824	7.98068	4.09421	4.85814	4.467	3.65235
GRMZM2G016088	1:189771388-189773099	1167	+	2.99894	2.01581	3.1727	4.75035	2.68828	4.53887	1.71603	4.56772		Shared	8
GRMZM2G016097	10:144306600-144313419	946	+	64.4854	66.1112	69.096	59.3451	43.7993	32.6671	47.8738	57.0103
GRMZM2G016145	4:70575715-70577029	700	+	3.85849	9.2254	164.394	13.1835	76.8422	35.5249	150.822	2.70003		Shared	10
GRMZM2G016150	1:288079121-288212243	1609	-	50.4298	35.2791	14.8694	15.9542	12.9655	13.3663	47.6661	44.5815	bZIP	Shared	11
GRMZM2G016153	8:103639081-103642147	1031	-	17.7815	18.2702	23.7249	14.8568	32.0816	30.04	23.2319	20.1588		SD609	11
GRMZM2G016184	5:14335719-14339816	1520	+	10.0685	13.3147	14.6242	10.2228	9.63273	7.15228	8.77938	6.62521
GRMZM2G016210	1:201637735-201642280	1935	+	5.20922	2.78912	2.11174	2.30898	106.149	0.413925	1.97147	1.75356		Shared	9
GRMZM2G016232	3:13952103-13953146	512	-	868.223	174.937	815.313	227.712	608.715	567.361	670.557	457.751		SD609	8
GRMZM2G016236	2:236814470-236817157	1128	+	3.37217	2.49889	2.94396	4.92218	3.07823	4.96678	3.28885	10.695		HS68	2
GRMZM2G016241	1:241372060-241372917	780	-	4.21318	3.32187	5.92907	7.3512	2.4231	1.89446	4.28062	3.42869		HS68	3
GRMZM2G016264	10:5398438-5399961	1524	+	0	0.0424515	1.20486	0.831737	0.565406	0.413356	0.0331404	0.156416		Shared	4
GRMZM2G016278	5:31331108-31339794	5137	-	0.560727	1.01556	0.731554	0.654413	0.703799	1.39984	1.05587	0.678535		HS68	4
GRMZM2G016281	1:64603682-64605752	842	+	13.6274	4.71359	1.63526	1.63055	3.37777	2.2691	4.86701	3.05163		Shared	6
GRMZM2G016290	1:297751482-297752955	1254	-	2.33927	4.72162	3.27552	3.01798	2.58955	2.41664	3.76059	3.82854		SD609	10
GRMZM2G016323	9:13163199-13174652	3230	-	218.185	145.741	86.8776	140.255	103.149	91.0002	115.969	124.058		SD609	7
GRMZM2G016351	3:49384523-49386081	1399	+	1.00573	0.328644	1.47639	1.20709	5.06991	5.9322	7.76891	0.403551		SD609	9
GRMZM2G016370	10:5384594-5386617	1362	+	4.19779	1.53415	1.4984	1.07073	3.58271	1.22462	6.55373	4.40213	G2-like	Shared	11
GRMZM2G016382	3:146784418-146791027	3820	-	4.23657	5.99839	3.76948	2.97951	3.15712	2.72252	3.68386	2.86098		SD609	2
GRMZM2G016393	5:148603723-148606938	902	-	13.5284	12.8254	17.193	13.2074	23.8199	26.207	11.0486	20.0286
GRMZM2G016439	1:205219468-205222548	1033	-	122.81	82.4029	150.706	107.955	75.2915	85.3993	88.7047	134.218		SD609	8
GRMZM2G016443	1:16436092-16436784	693	+	0	0.350706	0.178989	0	0	0	0.0914714	1.43067		HS68	2
GRMZM2G016447-2	4:205553824-205557324	2143	+	37.8776	190.57	43.513	79.5512	28.3636	29.6694	35.2299	93.7731
GRMZM2G016477	10:136115082-136118591	3510	-	0.229064	0.82478	0.865684	0.392027	0.734486	1.25097	1.8382	0.600263		Shared	10
GRMZM2G016480	1:55080222-55085641	2296	+	0.981111	7.68392	7.08876	6.6569	2.42605	3.55323	3.30287	0.934501		Shared	4
GRMZM2G016521	1:209988504-209989094	591	-	0.952047	0.224649	0.944788	2.41178	3.1985	8.61581	2.97461	3.39013		Shared	5
GRMZM2G016546	1:276362105-276363857	933	+	13.6795	9.11943	14.5092	7.20139	15.532	10.1629	12.3035	9.35241		SD609	11
GRMZM2G016561	3:144097760-144100747	2304	+	7.42826	9.55935	11.8494	9.85545	5.29263	6.96632	8.01757	7.19348
GRMZM2G016602	1:252142859-252154197	1966	-	20.0513	13.9391	15.8386	14.2245	31.5049	16.6882	21.6852	23.799
GRMZM2G016605	8:106628044-106630689	2331	+	5.07161	11.6738	4.15543	10.9021	7.16168	9.92693	7.35244	8.71204		SD609	4
GRMZM2G016649	2:21790270-21794860	3590	+	38.4465	33.7719	29.3952	40.2624	35.6272	32.1809	34.8961	71.5435	Trihelix	HS68	2
GRMZM2G016660	7:101575774-101585697	1861	-	16.9106	11.1393	28.599	14.7602	27.5244	20.7225	19.9335	13.207		Shared	9
GRMZM2G016668	3:144101455-144102914	1260	-	0.258354	0.745066	1.14272	0.651406	0.613556	0.841725	1.62084	1.7639		Shared	10
GRMZM2G016677	2:236795997-236797007	777	-	0.673871	0.893688	2.12951	3.3969	3.06609	3.97962	0.621241	1.70276		Shared	5
GRMZM2G016734	1:47325397-47326625	507	-	92.6878	147.564	79.0863	38.3888	45.1961	37.0155	100.969	49.1828		Shared	13
GRMZM2G016774	1:297786903-297797064	3469	-	5.60658	7.05962	3.86585	7.82162	4.01427	5.11023	4.58113	3.77393
GRMZM2G016802	8:160531034-160535204	3284	+	2.09555	9.72132	2.62971	0.952635	4.289	3.53477	4.47226	2.94627		SD609	5
GRMZM2G016819	10:134399446-134400663	1218	+	3.78223	1.86557	3.24187	1.40984	2.99163	1.29446	3.55782	2.15128		Shared	16
GRMZM2G016836	7:133623102-133624600	1020	+	9.93398	8.92268	0.0531196	0	6.06175	4.79549	0.974598	0.254529		Shared	6
GRMZM2G016844	2:211897901-211899706	1806	+	3.12149	2.30367	2.86813	1.13787	3.06646	2.18739	3.99906	3.12516		Shared	16
GRMZM2G016878	5:40226671-40230974	1738	-	9.45178	12.7189	16.6656	11.8466	9.90293	13.3498	11.9081	8.26662		SD609	1
GRMZM2G016890	10:34232728-34237674	1936	+	24.3666	2.9031	3.3412	3.21902	1.5865	1.08875	0.0931728	0		Shared	6
GRMZM2G016923	4:224234423-224238882	2478	-	0.285973	1.15255	0.244658	1.17197	0.32728	0.47789	0.478331	0.512453		SD609	4
GRMZM2G016928	2:73288569-73293299	554	+	413.361	126.639	518.621	257.837	338.356	335.01	309.325	360.922		SD609	8
GRMZM2G016936	4:227541234-227545870	1560	+	0.0904642	0.176455	0.348596	0.340847	1.08697	0	0.0362225	0		HS68	5
GRMZM2G016958	7:25903740-25911023	1499	+	263.807	467.815	89.9504	422.607	257.008	410.094	125.247	256.892		Shared	12
GRMZM2G016997	4:193336793-193345308	3589	-	0.906847	1.54736	0.456435	1.58699	0.770241	1.72719	1.03297	1.19996		Shared	12
GRMZM2G017008	1:146158269-146159186	918	+	0.384467	1.18895	0.303709	0.969181	0.280345	0.770701	0.681436	0.680255		SD609	4
GRMZM2G017013	7:141576711-141578033	1047	-	44.9292	57.5857	30.8141	69.6634	44.8898	86.0646	28.629	82.1413		HS68	7
GRMZM2G017022	4:227887432-227889659	1974	+	6.04171	2.77776	0.653952	2.82292	2.72207	3.61298	3.17776	7.48623		Shared	11
GRMZM2G017047	1:255317538-255318848	1311	+	2.79384	1.05361	3.20909	3.54546	4.60413	1.09678	1.45996	2.73737		Shared	4
GRMZM2G017080	7:166549019-166552956	1056	-	1.11129	2.80125	3.18203	1.29681	0.190009	0.483125	3.75411	3.24819		Shared	10
GRMZM2G017081	5:59807383-59812440	2062	-	3.15419	2.7618	5.02812	2.06224	2.72619	2.7452	4.3395	2.5488		Shared	14
GRMZM2G017087	1:271341181-271348525	1082	-	0.0661221	4.36551	5.01394	1.85353	0.132948	1.12289	6.22877	0.186515	TALE	Shared	10
GRMZM2G017110	1:198230314-198233863	2137	-	42.5887	91.9482	64.2546	73.4593	45.0914	37.8206	66.761	13.7625		Shared	2
GRMZM2G017157	6:162673368-162677051	2100	+	0.617249	4.6817	0.180793	0.0721652	0.209511	0.750224	0.508139	0.759124		SD609	5
GRMZM2G017164	10:100226280-100228682	2403	-	1.55288	2.56183	2.35535	2.11353	3.18178	2.00804	2.03846	1.30949		HS68	5
GRMZM2G017170	1:156216911-156220850	2784	-	1.40047	0.457547	3.48434	1.47655	2.04091	1.19949	0.879736	2.29323		SD609	9
GRMZM2G017186	1:276323596-276328341	2349	+	19.008	26.7782	16.8054	20.141	9.32797	15.8435	21.7525	16.9258		HS68	3
GRMZM2G017193	8:156254963-156258866	2302	+	0.241314	1.38135	1.458	1.17996	0.323957	0.793914	1.64468	0.640465		Shared	10
GRMZM2G017197	2:14534165-14536822	2658	+	0.0156276	1.29071	0	0	0	0.0645024	0.987771	0.0299357		Shared	13
GRMZM2G017229	5:74639754-74656286	13456	-	21.5158	29.0623	34.9529	24.512	23.5585	15.9053	22.3726	17.1931		HS68	10
GRMZM2G017237	1:240379299-240383891	2679	+	7.07346	2.36221	7.21078	4.24905	3.94346	3.25359	3.83613	3.23905		SD609	8
GRMZM2G017244	9:7266115-7267629	1515	+	0.656167	1.23469	0.811351	0.187616	1.65097	1.39747	0.709936	0.413259		Shared	9
GRMZM2G017257	9:7186938-7210721	4403	-	12.8927	13.9286	14.3922	15.398	17.3515	25.2454	20.3384	12.214		HS68	4
GRMZM2G017269	6:162690804-162694192	1785	+	7.84756	6.01317	11.0315	10.2055	11.9178	15.4196	10.3164	15.2901		SD609	6
GRMZM2G017319	1:255323990-255325492	756	+	0	0.309549	0	1.38648	0	0.125293	0	0	LBD	SD609	4
GRMZM2G017321	4:43151478-43152360	651	-	0	1.92408	0	0	0	0	0.100403	0		SD609	5
GRMZM2G017365-3	4:168546653-168547483	831	-	1.66812	4.32263	6.65837	1.77041	4.07748	2.30976	2.90207	1.77501		Shared	2
GRMZM2G017388	1:238565294-238567204	1911	-	0.0318094	1.50608	0.452188	2.32628	0.232829	0.358788	0.332176	0.402309		SD609	4
GRMZM2G017411	4:201478225-201481434	3210	-	1.92448	1.54337	0	0	0.0423089	8.82073e-05	1.26005	0.449473		Shared	11
GRMZM2G017414	10:137163492-137170178	3458	+	2.25159	3.5648	7.18917	3.13152	2.00792	2.35536	8.12533	1.87313		Shared	10
GRMZM2G017416	5:3291281-3292667	960	+	1.89196	1.38913	5.53704	4.19897	4.18595	4.50264	2.43208	4.18139		SD609	9
GRMZM2G017419	10:89922265-89924618	1533	+	2.94079	2.20938	3.48925	3.39753	3.34248	4.74716	1.75289	5.43481		SD609	6
GRMZM2G017426	10:121849511-121851385	1875	+	3.09957	3.34841	0.601261	1.67657	1.89946	3.08603	1.82404	1.02709		Shared	1
GRMZM2G017429	5:207899052-207900224	1173	+	1.804	1.27761	1.87019	1.91884	1.38977	2.04857	0.635006	1.9956		HS68	7
GRMZM2G017474	10:144317619-144318077	459	-	11.7826	7.92362	3.48725	8.53673	5.94607	7.01897	27.8649	29.1081		Shared	11
GRMZM2G017486	1:166925146-166926738	1593	+	1.54205	2.65729	1.55335	1.00436	0.000518924	6.38497e-05	2.02323	0.597548		Shared	13
GRMZM2G017520	3:48493266-48494830	1284	-	2.82846	2.86107	3.90952	3.43848	3.96797	7.65829	3.45285	1.59652	MYB	HS68	4
GRMZM2G017522	8:130684963-130687088	1535	-	3.14928	11.5165	2.13129	1.73323	7.04817	6.27639	3.45645	3.77072		Shared	1
GRMZM2G017528	7:61207045-61208415	1371	+	5.5105	2.64497	4.27852	3.53252	7.04109	6.49573	5.78255	4.13338
GRMZM2G017532	5:3285697-3289990	1026	+	49.317	32.1787	38.0114	52.3614	67.915	61.4251	65.2273	75.3212
GRMZM2G017550	7:163783453-163784822	1119	-	2.15105	0.67714	1.69906	2.10903	0.981727	0.973305	1.68296	2.94591		Shared	8
GRMZM2G017593	7:163785157-163787649	2025	+	0.495456	0.41303	2.84572	3.11974	6.5096	3.94011	4.44512	5.14467		SD609	6
GRMZM2G017606	4:216001789-216002810	891	-	0.159951	3.71021	0.631774	3.62881	0.291507	1.10217	1.09556	0.606416	SRS	SD609	4
GRMZM2G017616	1:16575185-16581385	2853	+	2.21689	3.67132	4.33013	3.88709	2.30084	2.11698	3.79191	2.02978		Shared	2
GRMZM2G017636	6:80644626-80645699	1074	-	3.39607	4.9895	8.99139	5.15303	12.7407	7.56489	5.61893	4.2135		Shared	9
GRMZM2G017643	2:54259012-54260133	696	-	0.562797	1.9906	0	0.709151	0.204577	0.140988	0.620436	0.710858		SD609	5
GRMZM2G017647	10:140305832-140311257	1492	-	17.2577	12.1361	11.2971	9.26928	19.9251	13.457	8.71697	11.3876		HS68	5
GRMZM2G017666	8:53818627-53819859	577	-	762.097	1159.26	726.949	880.611	560.255	27.425	679.123	189.547
GRMZM2G017670	1:66770007-66770679	546	+	0.327876	34.2352	0	21.0611	0.445021	2.87379	0.398485	1.24136		Shared	13
GRMZM2G017671	6:47529913-47533629	2780	-	39.0559	17.1901	38.3044	18.9326	32.817	33.3447	35.6032	31.1019		SD609	8
GRMZM2G017682	5:2473291-2476510	2002	+	4.57338	8.71839	3.51199	4.0563	4.29011	4.39962	3.92601	6.1323		SD609	5
GRMZM2G017709	1:271319331-271339159	2765	-	39.259	35.6117	11.8812	20.6258	28.0269	61.4664	23.0962	71.1186		Shared	8
GRMZM2G017730	5:50726678-50756506	1749	+	10.6426	4.05131	2.86485	5.82287	16.5084	7.1899	7.84715	8.48513		Shared	6
GRMZM2G017739	9:111460019-111462267	1019	-	0.63695	1.79613	1.00863	0.762423	0.245223	2.31241	0.759091	0.509692
GRMZM2G017741	5:84084460-84085788	1329	+	0	0	0	0.000274393	0.333174	1.16859	0	0		HS68	11
GRMZM2G017792	1:43685896-43688237	1131	-	1.29727	2.67291	3.40004	2.82468	3.66027	4.28542	2.04038	1.04363		Shared	15
GRMZM2G017804	4:11823962-11828247	1284	+	39.8391	17.5826	7.97866	11.9626	22.3054	20.2534	26.1561	24.5864		SD609	7
GRMZM2G017805	5:35269210-35273150	2361	+	3.27789	6.31004	2.21387	3.07673	6.00948	9.27103	6.68239	6.44298		SD609	5
GRMZM2G017809	3:64703521-64704237	456	+	0.677311	3.04052	0	0	0	0	1.2857	0		SD609	5
GRMZM2G017815	10:132367977-132373045	3168	+	1.41493	1.75478	2.3386	1.36851	1.34801	0.857107	1.92464	1.3077		Shared	2
GRMZM2G017821	8:77588507-77590249	1743	+	0	3.07228	0.000957383	0	1.21769	8.18627	7.14947	0		Shared	1
GRMZM2G017852	4:168544693-168548083	3226	+	1.16778	2.7475	2.03271	0.662824	1.83306	0.986586	2.12356	1.09908		Shared	10
GRMZM2G017856	10:89923347-89933009	2930	-	3.74352	6.74111	7.86286	4.80248	4.77581	7.5133	7.45157	7.32321
GRMZM2G017882	5:85864160-85865051	645	-	0.125984	2.73166	0.398188	0.476184	0.114359	0.473365	0	0		SD609	5
GRMZM2G017894	7:173433049-173442343	3072	+	2.71464	2.49922	5.2521	2.64613	3.31623	1.92082	6.1093	4.94662		Shared	10
GRMZM2G017966	6:40208678-40209437	276	+	420.649	492.57	24.0577	28.5025	16.4237	15.2693	28.194	25.1991		SD609	2
GRMZM2G017982	9:82091714-82094513	930	-	0	0	0	0	1.30936	0.947162	0.182701	0.0955449		HS68	9
GRMZM2G017991	5:170023516-170024139	624	-	189.991	75.8021	215.979	78.2839	98.4439	55.0888	116.234	70.7643		Shared	7
GRMZM2G018004	2:188885320-188885616	297	-	4.05914	7.11506	1.60844	5.90796	5.28345	8.43981	0.567234	8.46755		HS68	7
GRMZM2G018018	10:136435347-136454851	2017	-	1.07769	1.33758	1.85044	1.82281	1.5297	1.41562	0.127301	0.191906		Shared	4
GRMZM2G018022	3:152578169-152582853	978	+	0	0	2.7905	2.81832	0	0.147451	0.28529	0.8921		Shared	4
GRMZM2G018027	10:134717901-134718548	495	-	1.94054	4.01634	0.61356	6.10882	2.97758	9.23135	0.630162	4.40605		Shared	5
GRMZM2G018037	6:102653512-102654426	369	-	2.1319	0.369685	2.52996	4.91015	5.69629	4.88741	3.49857	4.47025		SD609	6
GRMZM2G018059	2:48655608-48660379	2715	+	2.89784	4.50837	3.07644	2.69178	4.72843	3.01065	5.91773	5.8167		HS68	8
GRMZM2G018062	1:78986431-78989261	1358	-	4.7874	4.02531	5.49361	2.35381	4.81652	2.70359	3.80686	3.52357		SD609	11
GRMZM2G018070	2:188900333-188900806	474	-	27.9212	26.9534	11.9489	30.6605	22.519	27.3293	29.6862	30.7102		SD609	12
GRMZM2G018082-2	5:35276639-35278607	1113	-	1.08273	2.6028	4.56118	5.9145	0.603943	1.58279	2.80767	1.44479		Shared	4
GRMZM2G018108	7:131437002-131438556	1434	+	4.70551	5.16521	45.6685	17.19	16.1493	23.6023	14.3947	5.23637		Shared	4
GRMZM2G018193	4:5590233-5590550	318	+	0	15.691	0	16.079	5.63854	33.4295	1.77848	8.05935		Shared	5
GRMZM2G018197	2:233433773-233435938	1373	-	206.856	86.3667	275.752	155.217	184.589	174.562	164.194	170.582		SD609	8
GRMZM2G018228	8:28524200-28526318	731	-	756.722	302.304	845.46	524.963	658.93	558.631	422.924	409.598		SD609	8
GRMZM2G018238	8:101438463-101440085	1623	-	2.64455	6.66836	4.57075	4.39743	4.69636	6.2921	4.77407	6.49481		SD609	10
GRMZM2G018241	2:161124006-161138148	4152	+	10.6596	16.0344	5.07817	7.75239	12.8313	14.4548	11.3041	11.2165		SD609	2
GRMZM2G018251	4:240038086-240041825	2079	-	23.7495	11.4847	22.0767	21.3267	21.5268	16.0458	20.6895	21.8076		SD609	3
GRMZM2G018275	2:43118112-43118847	615	-	38.1321	32.6426	120.707	37.8998	68.8184	48.0201	58.6221	33.5324		Shared	14
GRMZM2G018280	6:97343970-97345467	1215	-	0.108003	0	0.0426531	0.408466	0	0	0	1.09238		Shared	8
GRMZM2G018314	10:134647347-134652537	3171	+	0.11517	0.957297	1.20464	0.653543	0.675926	0.593888	1.31383	0.42837		Shared	10
GRMZM2G018375	8:138143284-138144438	1155	-	8.83457	137.799	12.5555	44.3345	37.9297	115.13	12.7198	27.6879		Shared	12
GRMZM2G018398	4:176036940-176039612	1620	+	71.0187	32.5868	61.6211	47.6643	69.9581	57.1551	74.7072	66.8151	ERF	SD609	3
GRMZM2G018403	5:139625612-139662981	986	+	6.09459	4.53049	7.7407	12.6808	17.0143	11.7094	7.17852	9.95407		Shared	5
GRMZM2G018414	1:257183923-257188996	4555	-	1.624	3.05595	2.34449	1.06348	1.9279	3.05419	2.32229	0.613781	GRF	Shared	10
GRMZM2G018417-2	1:8311666-8351888	1495	+	5.20508	12.0697	13.8409	7.77401	8.51917	8.6302	8.50761	9.48489		SD609	1
GRMZM2G018417-3	1:8312427-8314657	568	+	5.37779	11.7507	8.1356	10.4513	6.26184	4.4253	11.819	6.40015		Shared	13
GRMZM2G018436	2:150029541-150030745	969	-	6.45084	2.29005	3.68021	9.21527	3.26797	3.95137	2.13585	10.0558	NAC	Shared	8
GRMZM2G018441	10:127258429-127260490	1101	+	0.42678	0.439703	0.626051	0.768562	0.0556457	0.535071	0.294408	1.61854		HS68	2
GRMZM2G018447	3:93187900-93205024	486	-	35.4984	48.7838	80.2258	72.7396	47.5825	48.2032	57.8253	35.9196		SD609	9
GRMZM2G018484	5:213279431-213282440	2807	+	2.96943	2.79023	4.11438	7.41234	3.94408	4.14486	2.54899	15.9139		Shared	8
GRMZM2G018485	10:134600410-134601624	1215	-	1.45804	0.166872	0.895714	0.544621	0.197263	0.473673	0.390971	0.0682737	B3	SD609	3
GRMZM2G018487	1:274880488-274884633	2215	+	4.04541	2.82707	10.1049	3.97452	4.21732	6.59108	8.88501	2.38673	WRKY	Shared	10
GRMZM2G018558	5:38390851-38397939	2073	-	0	0.0473497	0.725795	1.22073	0.026569	0.0576206	0	0.117265		SD609	6
GRMZM2G018573	5:213255736-213260195	2458	-	4.62593	7.24682	4.56686	8.62819	6.50306	9.23822	6.83478	10.0226
GRMZM2G018579	1:8352219-8353409	723	+	15.5561	9.01518	10.6068	18.3941	27.8031	18.2847	9.89073	25.4381		HS68	5
GRMZM2G018586	5:209284543-209292406	519	-	51.5138	68.6609	99.6865	54.2221	85.6131	64.3492	101.707	125.221		SD609	1
GRMZM2G018589	3:170365277-170370644	1241	-	4.63157	13.769	28.3503	89.8368	18.1219	29.1497	22.0137	36.1318	MIKC	SD609	6
GRMZM2G018593	3:124723860-124728634	2730	-	0	0	1.49631	2.03667	0.704211	0.779683	0.0493328	0.435209		Shared	4
GRMZM2G018595-2	2:1435271-1437423	1543	+	5.48135	6.49775	10.6073	11.2978	6.87918	6.59305	6.84022	8.55949		SD609	6
GRMZM2G018619	9:76755875-76760073	672	+	120.431	115.911	84.1871	120.306	67.186	53.7395	90.6037	110.989
GRMZM2G018678	1:52797641-52807025	2448	-	0.956208	2.03246	4.03832	4.71455	3.86166	4.38942	5.56669	7.49805		SD609	6
GRMZM2G018695	5:23657978-23659420	1443	-	1.45054	1.76518	3.92296	2.10588	2.41054	1.37708	3.28633	1.77862		Shared	14
GRMZM2G018707	4:225686272-225688044	1773	-	2.00861	1.74678	0.246155	0.218326	1.83732	1.69264	0.918187	0.481776		Shared	6
GRMZM2G018716	2:3224950-3227061	1659	+	0.0373698	0.269302	0.0590276	1.08369	0.0683501	0.889812	0.54053	0.945183		Shared	8
GRMZM2G018721	7:1920108-1921464	999	+	0.482474	0.56825	1.63334	0.868801	0.377195	0.345435	1.72051	0.261367	WRKY	Shared	10
GRMZM2G018756	2:30548211-30552692	1635	+	1.47134	2.26462	2.86777	3.18942	4.6065	3.68667	3.60459	3.09492		SD609	6
GRMZM2G018757	5:210999473-211002909	2617	+	1.48106	1.05801	0.655438	1.09551	0.86765	0.445368	1.3969	0.599587		HS68	10
GRMZM2G018760	10:130448112-130450191	442	+	52.5397	82.9958	84.5715	43.1179	67.4018	78.4503	51.8291	33.9392		Shared	15
GRMZM2G018770	4:228643508-228646235	867	+	383.78	137.91	323.777	200.549	345.805	305.462	230.712	274.559		SD609	3
GRMZM2G018786	6:42609144-42613032	1832	-	3.49786	5.48857	3.01079	8.50828	3.49859	4.99339	1.81784	4.34128		Shared	3
GRMZM2G018793	3:93184121-93185611	1074	-	1.63305	14.4677	1.20827	4.24717	0.579845	1.60608	3.00223	2.84427		Shared	13
GRMZM2G018798	1:274944329-274949769	1945	-	3.0146	2.13277	2.56932	3.16973	5.75016	5.61516	3.16723	4.09899
GRMZM2G018820	5:164727360-164730576	1512	-	81.8689	115.648	41.5712	76.1009	225.352	118.325	255.749	264.313		Shared	11
GRMZM2G018823	6:119162513-119165712	1224	+	23.2532	16.2435	24.0247	15.1813	13.2131	11.9866	22.6243	20.9731		Shared	7
GRMZM2G018849	9:21336895-21337671	777	-	5.67977	5.36213	0.76054	10.676	3.67931	12.5418	3.10621	14.8384		Shared	8
GRMZM2G018873	4:232849766-232850788	473	-	33.4615	27.715	6.85555	48.8659	44.0089	59.7704	22.868	64.172		Shared	8
GRMZM2G018876	2:33680451-33725302	1251	+	6.50267	3.95535	9.29007	6.75316	7.36578	5.08705	10.9104	10.2451	DBB	Shared	10
GRMZM2G018941	1:51013905-51015904	671	+	626.743	354.511	645.3	482.37	746.006	485.355	634.202	607.27		SD609	8
GRMZM2G018946	6:88692725-88698712	1337	+	1.58846	1.51247	1.43639	0.778312	1.61286	1.67016	2.00711	1.98958
GRMZM2G018951	3:37768863-37774880	3411	-	0.893699	1.46867	1.42413	0.506207	1.19461	0.376417	1.79942	0.380829		Shared	10
GRMZM2G018971	6:147877030-147880981	1926	-	7.59706	7.04703	4.18715	4.99779	2.9255	3.40285	5.73804	7.46389		HS68	8
GRMZM2G018984	1:17493905-17495096	1023	-	9.87911	5.40221	7.60438	10.0723	12.5388	11.9267	11.2729	4.58127	ERF	HS68	1
GRMZM2G018992	2:233400392-233401694	1206	+	1.52581	2.13298	4.7776	4.19052	2.73695	3.14104	4.12079	3.03137		SD609	9
GRMZM2G019006	5:29704534-29773257	1437	-	5.94834	7.73705	0.324014	0.111459	4.14955	1.04752	3.34432	4.6491		Shared	11
GRMZM2G019051	9:106850417-106856308	556	+	0	0	0.251468	0	1.43839	2.3797	0	0		HS68	11
GRMZM2G019085	2:71607185-71607547	363	+	5.17937	0.385104	3.21982	0.929243	3.94924	4.62567	3.95011	3.72266		SD609	3
GRMZM2G019090	3:136264499-136323790	1051	+	3.72689	23.2684	28.0253	29.8132	8.77697	12.0282	9.39448	11.0377		SD609	6
GRMZM2G019106	4:238991222-238994575	1506	+	6.1811	3.60356	4.54407	2.40662	3.52362	2.86026	3.71802	2.1964	bZIP	SD609	3
GRMZM2G019144	4:240018859-240030211	3251	+	7.82692	9.62118	7.47048	6.54813	8.9458	6.64955	7.51295	4.431		HS68	1
GRMZM2G019166	4:238987194-238990343	964	+	34.9534	21.5664	24.2405	15.1055	20.5649	24.646	22.962	25.6062		SD609	3
GRMZM2G019171	1:243332492-243333832	1341	+	3.73142	2.1705	3.37388	2.77031	1.90014	7.44038	6.10034	2.74549		HS68	4
GRMZM2G019177	4:169006715-169014054	4045	+	3.77847	13.8949	0.954478	2.43067	13.9183	15.3604	6.80724	6.02007		Shared	1
GRMZM2G019183	7:107926199-107930798	4375	+	32.0005	47.7229	10.3001	18.8811	15.9656	18.7631	15.8496	29.0827		SD609	2
GRMZM2G019185	3:151940117-151942677	1203	+	0.192717	0.957142	0	0.647629	0.0586116	1.30209	0	1.13686		Shared	8
GRMZM2G019246	10:99203865-99206392	2003	-	7.36314	6.46412	5.12311	17.6863	8.77215	13.2801	5.80743	12.4632		Shared	8
GRMZM2G019257	6:6015301-6017271	1165	+	20.0386	17.3403	13.7464	11.727	9.9354	9.65662	13.9865	15.5196
GRMZM2G019266	3:172623697-172629594	2466	-	8.83571	14.5016	20.1315	12.7609	9.30381	7.83225	14.9733	5.34427		Shared	2
GRMZM2G019317	5:204589971-204593979	2556	-	1.71858	4.92284	9.6661	8.44073	6.51689	6.4734	10.8848	5.67078		SD609	9
GRMZM2G019325	10:142067932-142070612	711	+	568.979	243.524	626.255	422.093	510.365	436.718	516.316	506.91		SD609	8
GRMZM2G019328	8:115176054-115176885	714	-	0.972314	1.21085	4.79533	5.69109	3.19857	2.46167	0	0.688482		Shared	4
GRMZM2G019335	4:134019094-134020054	762	-	10.1886	7.24502	7.15713	4.98626	8.36957	3.34567	3.19231	4.85182	DBB	Shared	6
GRMZM2G019356	9:23145883-23146905	1023	-	16.0492	16.4006	29.5804	17.7859	12.7496	9.71932	23.5279	4.14184		Shared	14
GRMZM2G019358	4:228626343-228632549	2356	+	1.32957	2.63742	2.34212	6.5638	1.11895	2.1173	1.5242	2.94895		Shared	3
GRMZM2G019363	7:147202987-147205104	915	-	0.540569	0.534406	1.15907	0.0973346	0.351929	0.259092	1.05768	0.195193		Shared	14
GRMZM2G019373	7:163575209-163576087	879	-	0.54316	0.101567	4.12402	5.77344e-06	4.74575	2.4454	6.25612	0.300798		Shared	10
GRMZM2G019386	3:221612608-221615391	606	-	66.6795	35.0824	48.4187	45.2315	57.9491	48.784	67.7294	90.1366
GRMZM2G019404	2:4300038-4306484	2856	-	38.1394	52.1933	84.6948	52.9786	36.4391	42.8675	86.024	28.6684		Shared	10
GRMZM2G019413	8:170160333-170162123	1635	+	0.532034	7.58992	2.46111	1.72492	2.46737	4.47673	2.56528	1.58594		Shared	1
GRMZM2G019515	8:2901101-2904035	1176	-	33.9115	18.2568	21.0559	46.8946	36.5752	49.3484	14.2598	40.2305		Shared	5
GRMZM2G019562	1:74407510-74417228	3098	+	2.71008	7.96248	3.20971	5.73005	1.31468	2.58493	2.86197	1.57905		Shared	13
GRMZM2G019583	7:170386445-170387536	1092	+	0.061596	0.0634624	0.14596	1.00941	0.112431	0.30872	0.3966	0		SD609	6
GRMZM2G019586	9:88793084-88796169	1363	-	14.4102	6.84814	15.1637	13.4877	9.34397	7.2607	10.2889	11.2825		SD609	8
GRMZM2G019596	8:115229926-115237378	1879	-	5.80706	7.92342	8.32176	5.2882	7.33382	3.97903	6.26634	4.01656
GRMZM2G019612-3	8:170210447-170211876	849	-	0.341174	0.630595	1.13669	0.774752	0.466303	0.106856	1.33551	0.452952		HS68	3
GRMZM2G019619	8:99158776-99162310	1397	-	2.92487	8.93097	2.88429	1.38342	2.84105	2.38418	3.33458	2.20724		SD609	5
GRMZM2G019621	10:125214087-125219938	2130	+	5.43433	2.87204	6.30484	3.90124	6.6491	5.43364	5.94673	3.66987		SD609	8
GRMZM2G019641-2	1:231091008-231091268	261	+	1.23264	13.2016	12.7424	3.04091	13.3259	10.7151	11.8094	0		Shared	10
GRMZM2G019681	2:108049150-108057641	723	-	25.5157	23.2192	27.5116	27.1013	22.4959	13.4557	22.962	25.9567
GRMZM2G019686	3:155091248-155091605	345	-	10.1311	20.138	13.3971	0	9.34788	2.63801	33.052	4.2441		Shared	10
GRMZM2G019689	1:34153625-34155562	1938	+	1.0296	1.32127	0.762186	0.998483	2.27526	1.86778	1.65286	1.64449
GRMZM2G019695	5:816400-819627	997	-	108.392	51.2352	73.7195	97.3483	106.746	111.984	76.5334	144.993
GRMZM2G019746	7:1954723-1957167	1925	-	0.544028	1.17499	0.499281	1.15929	1.71745	2.14831	0.295532	0.587519		Shared	5
GRMZM2G019771	8:74621072-74623094	1920	-	0.677848	1.01211	3.10335	1.18639	1.42043	2.35303	2.20044	0.738246		Shared	14
GRMZM2G019777	8:170223363-170225456	2094	+	0.976054	0.974987	1.47364	0.868751	2.1018	1.5111	1.06056	1.01667		Shared	9
GRMZM2G019783	2:17986680-17997746	1554	+	5.44615	8.66929	5.36526	4.59035	5.0358	5.1881	5.71697	3.9645		SD609	5
GRMZM2G019799	1:286357764-286366211	4798	-	0.823325	2.12249	1.46642	1.7133	1.47427	1.41046	1.66167	3.19619		SD609	10
GRMZM2G019806	1:270980410-270982940	2004	-	0.654656	0.527593	1.40501	1.17865	0.220744	0.310506	1.01721	0.387954	bHLH	Shared	14
GRMZM2G019810	3:41448056-41454650	1085	+	8.29042	5.6906	4.32292	2.51297	4.18297	5.16583	6.81087	6.60135		SD609	7
GRMZM2G019819	2:103045450-103049503	2013	+	93.6755	58.753	23.2271	53.4904	70.2483	44.3121	51.5235	63.7801		SD609	12
GRMZM2G019866-2	5:812748-813367	420	+	1.06374	8.55024	1.20036	13.7181	0.477119	8.31721	3.25315	3.13383		Shared	12
GRMZM2G019866-3	5:814392-814724	333	+	2.32966	10.218	7.00798	2.33577	6.99116	13.972	5.77721	7.02182		Shared	5
GRMZM2G019907	3:187290969-187336796	2458	+	1.64675	4.76139	2.82953	5.04019	2.4827	3.50387	1.92385	2.29989	bZIP	SD609	4
GRMZM2G019956	5:18130492-18133894	1931	-	0.129874	1.40975	0.670365	0.713524	0.473804	1.0244	0.306047	0.281085	B3	Shared	12
GRMZM2G019958	5:8814067-8822778	1435	+	0.652542	1.63309	0.837286	3.62327	0.371223	2.04463	4.08353	5.27683		Shared	8
GRMZM2G019971	5:150088645-150095830	2369	+	3.72728	3.02197	4.79595	6.46657	1.82581	1.70685	3.2437	3.36427		SD609	6
GRMZM2G019974	7:157503131-157504747	1617	+	2.57891	1.26807	1.03359	0	0.175986	0	0.433059	0.292058		Shared	6
GRMZM2G019986	10:142070859-142075097	2014	-	16.4213	17.5264	28.806	13.6418	16.859	9.8497	32.4447	22.3539		Shared	10
GRMZM2G020002	3:187332517-187340002	2049	-	25.6122	14.0632	27.6537	14.9261	32.488	25.3834	19.2758	17.8376		Shared	9
GRMZM2G020034	3:207400343-207410116	1683	+	9.4203	10.7818	12.8863	8.58395	17.8185	15.6762	13.388	7.55621		HS68	1
GRMZM2G020043	2:4302232-4303119	783	+	34.2873	45.2344	46.3605	39.2834	29.23	36.132	76.5958	24.4285		HS68	6
GRMZM2G020054	10:65424929-65425489	561	+	4.07632	3.24088	2.23025	7.50424	2.55509	5.88959	1.77759	6.13443	ERF	Shared	8
GRMZM2G020081	4:140699680-140701944	1548	+	5.85558	7.25811	7.19233	4.08508	4.53774	6.0187	7.71532	10.4087		Shared	11
GRMZM2G020104	7:920610-924400	2880	-	2.02331	5.18358	3.24356	3.85264	3.78014	5.68048	3.93026	5.17011		SD609	10
GRMZM2G020146	5:69097140-69101468	1551	-	55.5446	114.483	26.1935	93.8667	27.8846	29.9693	28.8638	24.8778		SD609	4
GRMZM2G020148	8:4432335-4433844	894	-	23.6691	26.5036	42.8642	15.2746	29.9056	15.4271	17.528	6.18532		Shared	7
GRMZM2G020150	6:156397724-156398386	663	-	5.31937	6.7394	5.15826	7.3115	4.9404	9.23663	4.0048	7.63396	ERF	HS68	7
GRMZM2G020151	8:32233525-32235987	901	+	0.106546	0	1.51526	1.74542	0.096875	0	0.602044	0.403779		SD609	6
GRMZM2G020156	7:75897945-75903263	2270	-	0.947789	3.56191	3.30996	3.33773	1.41096	1.1484	2.03166	0.942081		Shared	2
GRMZM2G020254	10:65416247-65418103	1027	+	3.1921	0.143184	3.71072	0.419427	2.13766	0.173599	1.28609	1.04869	WRKY	Shared	7
GRMZM2G020255	7:175345442-175345888	447	+	0.352462	0	1.11248	0.00140806	0.560508	6.05809	3.75524	4.64874		HS68	2
GRMZM2G020285	5:204493299-204497532	2441	+	3.00943	5.21958	3.44568	4.15039	2.94472	1.60237	3.4155	2.0507		HS68	10
GRMZM2G020288	4:10348675-10350044	603	-	65.1027	35.9339	29.4761	9.50379	48.7678	25.8938	16.0481	25.7516		Shared	6
GRMZM2G020291	8:72174761-72183097	4879	-	19.3549	19.7504	7.7023	19.4786	12.3127	16.5781	13.3904	21.1601		SD609	12
GRMZM2G020295	1:235360865-235365617	1066	+	22.5244	25.9222	23.0818	23.58	27.3032	29.2225	18.8994	14.2624		HS68	9
GRMZM2G020302	4:34921243-34931342	1013	+	117.683	78.7639	100.082	58.5806	116.775	78.0802	128.422	62.5451		Shared	16
GRMZM2G020320	5:69115135-69116682	1548	-	0.0404872	0.166739	0.927315	0.0510463	0.592259	0.101476	1.07386	0.153597		Shared	10
GRMZM2G020423	3:132018845-132019591	630	+	0.191975	45.8417	0.45524	5.82348	0.173303	2.16934	0.155829	0.723364		Shared	13
GRMZM2G020429	1:193604461-193607873	1172	+	1.58015	8.25504	9.09328	6.75856	7.67748	7.21321	10.6248	4.56616		Shared	10
GRMZM2G020450	7:170470820-170472973	1867	-	6.81049	6.17811	7.41866	6.86686	6.43816	4.77742	4.47925	3.05106		HS68	9
GRMZM2G020484	8:13906327-13913544	2405	+	35.6131	67.7446	28.0958	41.0074	62.6245	62.9032	24.4166	52.0988		Shared	5
GRMZM2G020500	2:18073179-18075592	2257	+	18.2439	8.79878	9.67378	8.06641	13.7212	10.6721	17.9255	24.3314		SD609	3
GRMZM2G020508	4:2623463-2631876	5576	-	17.1578	10.6604	20.4923	18.1456	8.30124	5.57779	33.6325	18.1296		HS68	3
GRMZM2G020556	1:244162091-244162465	375	+	0.677415	0	2.05709	5.02326	3.35229	1.15704	0.560395	0.860206		SD609	6
GRMZM2G020588	9:38520210-38528911	513	-	7.76753	1.67651	2.30466	5.35071	0.329297	0.68447	3.2303	5.15213		Shared	6
GRMZM2G020594	8:165167938-165172355	1416	-	3.64213	3.62028	3.51059	1.55625	3.5855	3.59706	2.51516	2.23264		SD609	2
GRMZM2G020631	1:195753150-195756180	1171	-	8.48296	15.5582	4.74588	7.41759	21.8587	22.9723	8.62837	12.4224		Shared	5
GRMZM2G020657	5:48058842-48059927	1086	-	0	0.0639017	1.9106	0	0.169805	0	0.748783	0		Shared	14
GRMZM2G020704	2:129941663-129958348	3303	+	0.261891	0.143699	1.54782	1.54329	1.10023	1.07775	0.134452	0.135293		Shared	4
GRMZM2G020742	6:113273424-113280365	2077	+	0.501953	0.421359	1.80879	0.348628	0.31768	0.204247	0.72922	0.206089		Shared	14
GRMZM2G020761	9:127304335-127308662	1739	-	1.099	3.67874	2.75066	13.3843	2.97837	4.14396	3.07935	12.1958		Shared	8
GRMZM2G020772	3:18996589-18999319	1874	+	6.30952	11.0617	15.7164	9.99776	11.4762	10.8067	15.2002	11.9753	MYB	SD609	1
GRMZM2G020785	8:153792310-153793496	456	-	1052.29	1068.03	3686.45	1340.54	1959.12	345.177	3296.01	190.452		Shared	14
GRMZM2G020805	2:234795589-234801981	2150	-	1.57832	0.860483	1.55604	0.750441	1.12016	0.955917	1.27851	1.96586	TCP	SD609	11
GRMZM2G020814	6:164578141-164584494	2034	+	26.5909	37.3052	12.3815	38.5874	21.7043	46.9042	17.9939	47.362		Shared	8
GRMZM2G020826	2:21279388-21280885	792	-	0.562529	1.26195	1.03695	1.53601	1.53604	0.97759	4.2345	2.01376		HS68	3
GRMZM2G020840	5:167584756-167585250	495	-	13.8117	19.6828	0	0	0	0	0	0		SD609	2
GRMZM2G020843	2:2103057-2108746	1795	+	7.61714	4.98352	8.99327	4.42731	7.30245	5.81596	7.95666	6.66375		SD609	11
GRMZM2G020856	6:148516435-148521102	2057	+	0.968121	1.5906	0.626351	1.17605	0.602751	0.932915	0.689212	2.11315		Shared	8
GRMZM2G020864	4:185099690-185101258	1569	-	1.49889	0.00588072	5.662e-05	0.879116	0	0	0.000123169	6.11025e-05		SD609	12
GRMZM2G020898	2:233762485-233764581	1461	+	2.77245	2.72091	0.923775	1.25617	0.158385	0.86858	1.32331	2.08157		Shared	11
GRMZM2G020912	6:81964881-81971786	3981	+	14.8793	28.3696	10.8787	18.6794	9.35642	10.1094	12.4295	10.6797		SD609	5
GRMZM2G020915	4:183033073-183034347	1275	+	0	0	0	0	0	0.0638301	0	4.70147		HS68	2
GRMZM2G020938	4:162689284-162692538	2269	-	1.11391	1.31457	1.57719	1.51071	0.891811	1.04012	1.3651	0.531421		HS68	6
GRMZM2G020943	6:116330642-116334278	1527	+	100.136	41.4647	54.7768	73.2327	96.7887	75.4194	83.1897	95.1424		SD609	3
GRMZM2G020974	1:235365586-235367257	957	-	4.73453	2.40237	5.75376	2.57073	3.18784	2.55532	4.69333	3.40626		Shared	7
GRMZM2G020976	5:184223327-184230130	1544	+	7.43662	15.5309	16.8922	10.6839	12.7525	14.5997	17.6233	7.71019		Shared	10
GRMZM2G021044	2:21283592-21286252	2661	-	2.91493	3.75453	0.709435	2.04704	1.56704	3.1835	3.54258	3.21213		Shared	11
GRMZM2G021055	1:253715920-253720856	1747	+	9.28991	6.8751	4.60511	3.61731	5.68351	5.66547	10.3987	7.76991		Shared	11
GRMZM2G021059	2:61470231-61470638	408	+	8.47866	15.2536	8.49323	25.956	4.30486	15.558	7.38511	1.77993		Shared	3
GRMZM2G021069	8:110516652-110522959	2977	-	6.88554	7.72034	11.8589	11.9459	13.5216	14.5116	10.2902	8.81748		SD609	6
GRMZM2G021074	1:208164590-208168878	2857	-	9.88421	9.57628	3.05718	9.40383	7.65559	7.19303	6.53884	7.24858		SD609	12
GRMZM2G021095	1:44161620-44162434	708	-	1.09806	2.03967	0.0867566	0.138364	1.39733	1.51296	1.59579	2.91271	LBD	SD609	2
GRMZM2G021106	5:152566561-152567756	879	-	0.350813	0.58764	0.578914	0	0.0741895	0.204026	1.52833	0.3087		Shared	10
GRMZM2G021107	2:35265317-35265784	468	+	0.671816	0	0	0.604675	0.00375901	0.386462	2.50958	0		HS68	6
GRMZM2G021149	7:7954323-7955114	792	+	13.8627	2.43508	10.7389	4.89222	5.18344	6.98844	6.9367	10.3408		SD609	3
GRMZM2G021151	2:208361248-208361925	678	+	0	0.845066	0.924106	1.03157	0	0	1.13367	1.32945		Shared	3
GRMZM2G021170	10:96835890-96839472	1143	-	33.9466	18.4671	37.0281	32.2215	53.391	42.8445	32.6705	38.7841		SD609	8
GRMZM2G021194	3:227762985-227774411	3188	+	33.4457	27.0867	37.0307	32.8851	21.5749	24.352	34.1915	44.6201
GRMZM2G021223	2:111133574-111136859	1590	+	37.9158	28.3825	25.1121	26.4516	14.0674	23.5646	20.8132	31.6199
GRMZM2G021243	3:13276724-13280485	2109	-	15.6854	21.2769	14.9629	27.5425	15.0939	27.8046	11.5441	21.2927		HS68	7
GRMZM2G021270	5:199862634-199869550	4239	-	46.3365	26.7971	36.3617	25.9893	21.6911	28.2664	39.9639	42.5426		Shared	11
GRMZM2G021331	8:65969714-65972820	1662	+	294.287	105.986	189.137	154.669	229.786	196.489	222.793	195.033		SD609	3
GRMZM2G021339	4:165832488-165833856	1020	+	4.46107	6.28347	35.3137	11.9235	7.83742	7.73727	15.2866	5.19323	HD-ZIP	Shared	14
GRMZM2G021369	5:210273776-210275017	1154	-	3.56401	1.67312	5.27831	6.35257	4.50571	10.6033	5.93853	8.89779	ERF	Shared	8
GRMZM2G021378	3:134087749-134092954	1384	+	7.68466	13.4633	19.2894	14.1406	16.2214	13.724	17.8548	13.093		SD609	1
GRMZM2G021406	6:161833478-161835682	711	+	0.218278	3.26609	0.776061	126.932	0.396834	0.410121	0.616785	0.275718		SD609	4
GRMZM2G021410	3:13270464-13275130	1600	+	0.0389645	0	1.10785	0.196508	0.641314	0.439471	0.156571	0		Shared	9
GRMZM2G021416	7:11570070-11572928	2337	+	6.90521	9.90867	1.83471	3.74741	5.82908	2.49172	4.5211	5.09861		Shared	13
GRMZM2G021433	1:48419700-48420863	537	-	0	0.697133	0.155051	0	0	0	3.23913	0.212703		HS68	6
GRMZM2G021439	6:65264787-65266538	912	+	9.02016	3.67823	9.77758	7.12369	11.058	12.1729	6.85173	7.86703		SD609	8
GRMZM2G021470	6:164567203-164567877	675	+	0.000647518	5.99932	5.81287	0.000359601	3.25456	1.06039	0.000519787	0.737189		Shared	2
GRMZM2G021475	2:6057055-6062696	2451	-	1.85717	0.843849	0.838084	0.669099	1.36907	1.02779	1.87839	1.46441	HB-other	Shared	11
GRMZM2G021480	5:210261431-210262943	1255	+	0.674958	2.45989	1.10722	4.38544	1.09073	6.57106	0.459373	4.79201		Shared	5
GRMZM2G021482	10:124731965-124733351	1010	-	1.62585	1.1789	2.82099	1.28513	1.09673	0.119315	1.34709	0.343677		Shared	7
GRMZM2G021498	1:15511586-15516459	978	-	8.71183	5.76673	13.0471	8.12886	9.05569	7.36558	8.27074	2.86474		Shared	7
GRMZM2G021514	5:210254684-210260684	2082	+	7.53338	7.67688	8.8424	6.98469	7.39534	5.37349	5.34932	2.20069		HS68	1
GRMZM2G021517	3:227703097-227711189	2043	-	28.4741	22.2592	17.1268	40.8189	14.5671	12.6909	25.4305	47.2094		HS68	8
GRMZM2G021530	2:21324781-21326782	624	-	0.436384	2.18923	1.04692	1.50225	0.2404	0.444698	2.24968	1.84021		Shared	13
GRMZM2G021589	3:185967839-185972520	1267	+	2.26916	3.80508	5.26047	8.75587	3.38115	1.57805	2.0319	1.81932		Shared	4
GRMZM2G021605	4:181229002-181232042	1792	-	8.84036	17.9491	12.9795	18.5706	15.2726	17.805	21.5799	12.9349		SD609	4
GRMZM2G021607	4:133252609-133253954	936	+	1.72433	1.16448	0.592213	0.377968	1.16185	0.939273	1.08703	0.378993		SD609	7
GRMZM2G021610	2:205787028-205800519	1908	-	5.80003	7.37032	12.064	7.92914	6.9908	5.34212	5.93752	7.57913		SD609	1
GRMZM2G021614	8:8472253-8474656	740	+	0.762682	94.7773	0.141162	92.4554	3.59093	21.0663	4.15093	26.8402		Shared	12
GRMZM2G021621	1:91247420-91504701	1388	-	294.61	242.274	149.335	106.234	127.375	82.6592	238.107	286.034		Shared	11
GRMZM2G021635	2:6053241-6054050	810	-	11.6128	8.30664	0.00298855	8.86371	8.25159	12.5486	13.651	7.63049		Shared	11
GRMZM2G021642	1:298436757-298438354	1431	+	0.710246	1.27986	1.15697	1.00738	0.852	1.33507	0.999244	0.280656		HS68	4
GRMZM2G021661	6:167713758-167715805	1851	+	10.9772	20.4182	13.3542	15.3058	4.89756	9.48292	8.36697	6.03944		Shared	13
GRMZM2G021687	1:197846428-197848123	591	+	0.57677	2.9794	0.56973	1.99806	0.653445	0.722286	1.51683	0.546099		SD609	5
GRMZM2G021694	2:27000128-27001508	759	+	0.198933	1.64175	1.80741	0.877425	0.814407	0.249199	0.882779	0.753968		SD609	1
GRMZM2G021706	10:14642887-14764734	1086	+	0.339954	10.9133	3.93643	0.906638	0.354962	0.155426	1.08694	0		Shared	13
GRMZM2G021725	10:112568972-112573748	3734	+	0.650031	1.13343	1.01772	1.86218	0.513894	1.18348	1.13833	0.440966		Shared	3
GRMZM2G021777	5:183368099-183369212	1008	+	6.83089	12.0961	5.81306	14.7071	4.848	8.02536	5.32196	6.54582	CO-like	SD609	4
GRMZM2G021781	1:277375610-277376547	441	+	14.6958	8.48984	17.1431	6.97456	14.0792	13.8689	13.7331	17.0049		SD609	11
GRMZM2G021786	2:26976604-26980463	1536	+	0.490267	0.252388	2.12965	0.618128	1.53143	0.409596	0.65676	0.154993		Shared	9
GRMZM2G021790	8:70377805-70378650	846	-	0.257102	0.883681	0	0.108011	0.0780561	0.107365	0	1.19124	ERF	Shared	13
GRMZM2G021796	6:124551269-124551817	549	+	10.722	10.4123	6.80468	2.4554	7.35083	4.06832	6.97554	6.15079		SD609	2
GRMZM2G021816	1:197855140-197857946	1047	-	54.8718	18.0663	33.6998	21.2826	19.3148	15.5406	24.6217	16.6632		SD609	3
GRMZM2G021822	10:143173890-143176714	1935	+	2.9483	0.903921	1.9321	1.46327	2.09496	1.92611	1.99035	1.6661		SD609	3
GRMZM2G021831	2:45778915-45780234	1320	+	2.1498	2.16369	1.38925	1.17035	1.20525	0.795937	1.3359	2.59465	Trihelix	Shared	11
GRMZM2G021846	6:124531663-124550676	2322	+	3.30212	8.21859	9.54149	10.1674	6.11586	7.21837	6.20734	4.66239		SD609	6
GRMZM2G021864	10:81535521-81558203	2293	+	10.5025	15.3773	20.2888	14.1489	10.4432	9.02422	14.2721	5.41265		Shared	2
GRMZM2G021877	8:70455762-70457520	648	+	93.5296	159.976	44.6959	266.121	106.12	183.672	56.5368	278.265		Shared	8
GRMZM2G021881	3:185973551-185976671	879	+	0	0.167897	0.257295	0.205255	0.890274	1.42818	0.393718	0.1029		HS68	11
GRMZM2G021885	10:143166661-143169840	2064	-	6.33073	11.71	11.6121	11.7347	5.60662	7.49542	9.91128	5.83007		Shared	2
GRMZM2G021896	7:14885990-14888711	810	-	4.90896	8.53147	3.59084	5.84294	4.9657	4.55534	7.03731	4.82425		SD609	5
GRMZM2G021921	2:234708024-234719598	4896	-	5.09586	3.83281	17.1802	19.8345	10.9768	19.7373	10.9761	17.5158		SD609	6
GRMZM2G021973	5:30307422-30307667	246	-	1.83666	15.9741	0	20.2794	0	0	0	4.53805		SD609	4
GRMZM2G022032	2:193829707-193833620	2757	+	17.8362	20.4008	6.01841	22.6814	9.4809	17.5559	13.4044	23.1074		Shared	8
GRMZM2G022090	3:218777323-218779165	468	-	54.17	15.8051	26.8715	53.9003	31.3981	30.9423	24.8611	91.6641		Shared	8
GRMZM2G022120	7:1361852-1366891	1508	-	41.2414	33.3231	31.5171	29.7171	25.6933	17.0454	28.2152	19.9601
GRMZM2G022159	3:159939557-159942888	2606	-	48.8299	32.9829	21.5699	23.7136	40.6063	35.0087	38.5883	48.944		SD609	7
GRMZM2G022181	5:87035265-87036655	657	+	0.857814	1.01211	4.45408	0.1544	2.00286	0.767425	1.68337	0.309518		Shared	14
GRMZM2G022188	4:184351445-184482166	7638	+	8.89764	12.1843	14.4678	8.50343	8.7457	4.69672	11.6965	6.56666		Shared	2
GRMZM2G022213	2:207378496-207381869	2940	+	3.20397	6.77748	3.68638	5.08834	5.22059	5.60614	7.98582	5.78082	C2H2	SD609	5
GRMZM2G022229	2:36906175-36908877	877	+	24.7847	13.6865	39.1132	19.8556	24.11	24.1031	25.9037	26.5174		SD609	8
GRMZM2G022242	2:207385195-207386726	1425	-	1.07066	0.925045	3.63093	1.35018	2.81061	1.13854	2.36514	0.846148		Shared	14
GRMZM2G022248	1:298414222-298418319	519	+	8.03759	5.35754	13.2702	6.52321	7.58683	7.37958	10.1401	9.23975		SD609	8
GRMZM2G022253	3:196090785-196091177	393	-	34.664	23.8987	75.6999	22.7607	38.4032	38.7564	56.4517	32.8304		Shared	14
GRMZM2G022266	2:207400610-207402090	1413	-	7.75009	5.10384	9.57311	8.91883	7.04176	6.26761	3.98487	6.32429		SD609	6
GRMZM2G022269	1:298408628-298413568	1661	-	84.0156	50.4956	121.147	58.8339	90.7784	79.7591	94.9916	76.8559		SD609	8
GRMZM2G022279	3:225122876-225137990	1717	+	10.0836	4.5745	9.99235	11.6097	6.71717	6.13424	10.8321	9.2981		Shared	7
GRMZM2G022283	10:37537902-37559937	1387	+	4.4226	3.18741	3.13187	2.6698	4.21464	5.4557	3.95595	2.59821		HS68	4
GRMZM2G022311	3:213558243-213559748	1506	-	0.0836135	0.172181	0.231132	0.579804	0.22931	1.30978	0.537673	0.0528664		Shared	5
GRMZM2G022318	10:4611555-4615067	2620	+	10.9489	12.9294	29.4485	9.72176	10.2565	6.49864	12.6007	2.9913		Shared	14
GRMZM2G022368	3:219253417-219253779	363	-	0	0.385104	6.14693	2.78773	5.26565	2.31284	0.303855	1.86133		Shared	9
GRMZM2G022398	9:133207698-133211145	2008	-	3.36242	1.71957	6.70921	3.31499	3.87505	4.833	5.03642	3.22989		SD609	9
GRMZM2G022402	8:141102346-141104148	1420	+	6.00272	9.51669	6.40506	2.20272	1.39203	1.07023	7.0535	1.58605		Shared	2
GRMZM2G022413	2:36927422-36929465	558	+	8.22444	35.3114	37.4985	44.8238	25.6298	32.0836	16.653	14.9717		Shared	4
GRMZM2G022506	10:73132298-73135256	985	-	17.1672	19.1194	9.5497	9.12017	9.16881	8.13561	15.0483	13.2486		SD609	2
GRMZM2G022514	4:161548320-161552280	3016	-	0.885649	0.541023	0.57766	0.558975	0.811143	0.313655	1.05082	1.2602		HS68	8
GRMZM2G022538-3	4:230726269-230726403	135	+	0	328.82	0	0	0	0	487.542	0		Shared	13
GRMZM2G022547	8:45871557-45879290	3617	-	15.1841	21.6677	14.307	23.1132	11.191	8.16822	14.6137	5.67903		HS68	10
GRMZM2G022558	9:86863587-86865134	1548	+	4.90204	0.547294	3.17245	0.00916048	0.0156306	2.48821	0.323993	0		Shared	7
GRMZM2G022606	10:1876365-1879502	1875	-	1.38136	4.35777	5.76786	3.18803	2.40926	2.37944	4.8602	1.01191		Shared	2
GRMZM2G022611	9:136236496-136237524	1029	-	0.730149	1.29959	0.681609	1.92442	0.726655	1.08119	1.81695	0.503419		Shared	3
GRMZM2G022619	6:164682311-164684427	837	+	340.082	151.834	524.301	214.217	341.205	357.548	300.451	329.702		SD609	8
GRMZM2G022629	3:117256953-117259193	1896	-	8.53691	8.3245	14.7007	7.76957	8.22164	5.63101	8.12096	4.18079		Shared	14
GRMZM2G022642	3:223994906-224004171	1958	+	3.94448	4.38738	9.20745	11.2284	2.83037	2.31423	8.81609	4.9491		Shared	14
GRMZM2G022645	5:196507931-196511467	2398	+	2.8913	6.66078	7.08227	6.22174	4.00257	4.07866	5.84994	3.09373		Shared	2
GRMZM2G022651	3:4883073-4896304	3166	-	22.5151	11.7911	13.7574	19.6279	19.348	29.6653	18.4146	23.6598
GRMZM2G022662	1:290139724-290161388	610	-	65.0535	54.503	81.6766	36.5803	62.7797	32.1038	65.7156	39.5329		Shared	7
GRMZM2G022679	3:196062946-196064424	996	-	1.03786	0.641745	1.74894	0.174429	0.126212	0.173383	0.835724	0.262365		Shared	7
GRMZM2G022686	9:136176411-136180234	1035	+	0	0.135793	0.104093	0.338828	0.48792	5.89446	0	0	MYB	HS68	4
GRMZM2G022694	4:121839523-121840587	1065	-	0.00132105	0	0	0	0	0.000818565	1.16615	0.852586		HS68	3
GRMZM2G022710	2:107194598-107195092	495	+	2.13459	3.61471	0	0	0	0	0	0		SD609	2
GRMZM2G022726	6:44006806-44007753	948	-	1.81785	1.54326	0	0.013329	0.000163737	0.31475	0.000513785	0.000190643		SD609	2
GRMZM2G022782	8:39922191-39926321	2118	+	1.00811	1.88594	1.6144	1.10643	1.75201	2.66528	2.20275	1.4424		Shared	5
GRMZM2G022799	4:186487422-186488634	1050	+	14.2347	25.0014	11.4994	12.3973	26.8612	24.2403	22.4492	9.73291		Shared	1
GRMZM2G022820	6:44008177-44098049	1341	-	91.0303	39.3036	67.5185	51.2993	77.4029	62.2558	63.8412	54.231		SD609	3
GRMZM2G022836	2:6017790-6032365	3389	+	0.183426	0.645911	0.556792	0.102878	0.337243	0.227429	1.17313	1.30342		Shared	11
GRMZM2G022837	7:97622857-97627211	2443	+	1.28291	0.298901	0.516128	0.549412	0.864305	1.00476	0.726601	0.649668		SD609	3
GRMZM2G022856	3:196480986-196486364	5379	+	4.43749	3.07048	0	0.00329516	0.721088	5.56333	6.00747	0.000691867		Shared	6
GRMZM2G022863	2:225173618-225174077	318	-	1.07075	2.80196	12.7191	1.33992	1.87951	0.668591	8.89239	0		Shared	14
GRMZM2G022866	1:204867318-204870145	1035	-	0.329002	1.02653	0.833019	0.415284	1.20227	1.35043	1.25245	0.749593
GRMZM2G022904	7:109534088-109536518	1584	-	0.874047	0.595766	2.68395	0.695828	1.58025	1.92451	3.26782	0.199404		Shared	10
GRMZM2G022907	1:6390896-6391075	180	+	332.559	1136.65	566.085	305.27	773.822	226.88	870.786	854.295		Shared	13
GRMZM2G022915	3:214273488-214280386	3487	+	20.7706	13.3494	11.4884	36.9953	21.9011	30.4285	14.7388	37.3605		Shared	8
GRMZM2G022931	3:210507429-210508178	750	+	73.2307	26.9221	71.0414	32.3755	77.1008	81.5972	43.4206	73.0909		SD609	8
GRMZM2G022958	8:163002358-163002642	285	+	0.796514	9.25205	0	0	0	0	0	1.99003		SD609	5
GRMZM2G022972	8:12933393-12935725	1611	+	0.0811489	0.05496	3.02687	0.874665	1.21714	1.44996	0.30046	0.205564		Shared	15
GRMZM2G022974	2:33033558-33034427	783	-	0.0952461	0.392968	0	1.68045	0.0866807	0.95453	0.460958	0.481351		Shared	3
GRMZM2G022984	7:121763992-121765876	486	-	11.0306	4.98217	3.32923	6.81821	4.8849	6.0254	6.02687	14.1655		Shared	8
GRMZM2G022997	1:262131394-262156777	3153	+	7.52485	7.86083	6.06644	13.0192	9.41653	10.8381	6.32872	7.99551
GRMZM2G023003	5:144098253-144177341	6650	-	7.54897	8.05938	13.6537	10.9383	9.8649	7.0963	15.1409	8.44277		Shared	10
GRMZM2G023028	2:107179090-107182857	1004	+	10.9378	7.8665	2.63827	2.98887	6.85982	2.87309	3.4963	5.58093		SD609	7
GRMZM2G023051	6:89412205-89413563	1359	-	0.000114455	0.722347	0.000357696	0	0.000117536	0.284859	1.78166	0.365		Shared	11
GRMZM2G023059	1:204871699-204874119	375	+	4.44329	3.19907	1.8927	3.00658	14.9329	4.2744	9.52672	9.03217		HS68	10
GRMZM2G023068	1:175291561-175293576	838	+	7.23804	7.03123	5.05817	4.35786	2.10845	2.19253	13.1593	5.75851		Shared	11
GRMZM2G023071	2:6015471-6016799	1329	-	0.736693	0.970396	0.886963	1.05345	0.605809	0.509158	0.641886	1.70229		HS68	2
GRMZM2G023105	6:141796431-141865061	2172	+	6.04738	6.34435	5.39073	10.965	9.1627	13.8392	11.7129	12.3805
GRMZM2G023133	6:164688693-164689727	762	+	0.0989187	0.918383	1.79745	1.62054	0.91645	0.662434	2.63494	0		Shared	10
GRMZM2G023152	4:23846333-23847614	1116	-	0.119902	0.0617641	26.5654	8.08641	2.51719	0.150239	6.99564	0.303152		Shared	14
GRMZM2G023163	2:5817040-5820784	2078	+	5.51863	11.8794	7.32641	10.2236	5.42589	5.05401	7.99759	4.9405		SD609	5
GRMZM2G023190	6:164690445-164730224	1755	-	2.68797	5.27672	5.32809	5.62632	1.38988	3.19217	7.12583	1.80199		Shared	10
GRMZM2G023204	2:35325121-35326591	1368	-	1.82601	4.243	3.69799	4.36813	1.66858	4.10708	3.31296	3.07851		Shared	12
GRMZM2G023214	3:168900441-168911650	2379	+	1.06166	0.0563181	0.0196819	0.0314264	0.162505	0.0312358	1.03959	0.834645		Shared	11
GRMZM2G023220	3:214305581-214310088	1959	-	2.96188	5.78939	3.83706	5.04197	2.55159	3.55477	4.06081	1.98615		Shared	13
GRMZM2G023237	3:210522557-210523036	480	+	1.84624	0.424731	2.10809	1.29143	2.77478	4.87894	0.999959	1.03486		HS68	11
GRMZM2G023242	1:298331067-298333171	825	+	353.93	176.503	364.424	212.106	304.46	247.377	298.525	286.129		SD609	8
GRMZM2G023275	10:71111506-71283329	2941	-	2.06557	4.30582	1.21275	2.26558	1.66887	2.50562	2.3885	2.07023		SD609	5
GRMZM2G023279	3:182483881-182488718	1968	+	4.23308	10.3648	9.93635	16.5103	9.38212	12.1136	5.75339	7.40038		SD609	4
GRMZM2G023289	1:267887346-267894145	2397	+	300.128	116.322	240.794	184.689	408.208	224.351	295.415	235.554		SD609	3
GRMZM2G023291	1:251712369-251713778	525	+	11.2083	10.1426	8.44341	7.94006	5.85782	8.11288	15.336	6.6293	HB-other	HS68	6
GRMZM2G023293	2:193419787-193421237	466	+	3.37948	4.05402	1.54173	2.79956	2.92822	4.06867	4.67964	5.73787
GRMZM2G023346	7:161347097-161349617	2257	+	0.488384	2.38305	1.48237	0.632815	1.39167	1.72642	1.99563	0.816486		Shared	10
GRMZM2G023387	10:143717184-143719436	898	-	120.834	155.929	98.0786	190.279	141.617	154.675	62.3004	129.819		HS68	7
GRMZM2G023422	10:71103626-71276073	2876	+	2.541	4.27722	5.27587	4.80534	2.84375	3.01703	3.98664	4.34251		SD609	1
GRMZM2G023436	3:210536222-210537345	663	-	14.8701	11.5671	11.1775	30.5241	19.215	42.5592	10.448	36.4903		Shared	8
GRMZM2G023444	7:161336696-161339278	975	+	3.32042	7.45075	7.37317	6.91971	6.06255	9.15006	3.12408	4.08092		Shared	12
GRMZM2G023520	8:86746678-86747313	636	+	24.3975	5.05015	0.00430725	6.53874	0.00678434	0	0	0		SD609	7
GRMZM2G023591	1:182098497-182102050	2136	-	15.6804	28.1565	14.0977	35.9245	24.8164	38.0467	15.2109	47.8006		HS68	7
GRMZM2G023638	5:67596829-67600971	2679	+	8.13171	10.6003	7.88624	8.72739	7.87727	6.22454	9.52304	5.05989		HS68	10
GRMZM2G023655	6:142760299-142761549	1014	+	0	0.0772662	0.0592134	0	1.6039	0.932067	0	0		HS68	9
GRMZM2G023667-3	8:154154858-154156159	1302	+	13.1784	6.71146	4.38919	7.07447	10.3373	9.90133	10.6693	7.05564		SD609	7
GRMZM2G023711	5:211350748-211351952	567	+	4.00636	7.4847	2.80081	9.89886	5.16316	5.98158	3.86785	12.2533		Shared	8
GRMZM2G023715	1:54275889-54280770	3090	-	0.33452	1.21481	0.901336	1.09187	0.576737	0.616611	1.24771	1.13872		Shared	12
GRMZM2G023748	3:176678525-176681507	951	-	252.212	82.2475	539.305	159.568	286.167	185.626	257.975	192.599		SD609	8
GRMZM2G023755	8:94435417-94443225	1105	+	92.1075	52.7286	34.2334	109.912	122.431	63.2985	53.0892	271.704		Shared	8
GRMZM2G023786	3:223960956-223961951	573	+	1.06044	5.00955	0.598591	1.5266	0.548881	0.758808	0.367931	0.573672		SD609	5
GRMZM2G023836	6:142823877-142825706	1830	-	0.565675	1.26163	0	0.0151871	0.00163639	1.44355	0.00178067	0		Shared	1
GRMZM2G023840	8:59973279-59975318	1026	+	0.266494	0.892498	2.4208	2.35146	0.729336	0.751289	2.57467	0.42107		Shared	10
GRMZM2G023847	1:182095463-182096100	537	-	0	6.97121	16.2522	4.88262	5.79344	6.75342	9.15287	0.212703		Shared	14
GRMZM2G023863	1:272512-274767	883	+	14.6649	21.9593	13.9525	10.6985	15.4377	14.3363	14.3334	8.59541		Shared	1
GRMZM2G023872	8:72976463-72977989	1527	+	71.9064	142.437	8.38222	63.1191	41.4437	42.272	49.8279	54.5162	GRAS	SD609	5
GRMZM2G023921	2:5836382-5836969	588	+	0.726798	3.75455	1.03382	0.915553	0.790404	1.27422	0.47053	5.32158		Shared	8
GRMZM2G023946	2:60070932-60079260	1792	+	3.52411	5.62778	2.28372	1.59661	1.57005	1.72588	2.09772	3.65013		Shared	13
GRMZM2G023952	3:13068190-13070363	1605	+	0	0.279792	0.521264	1.90905	0.0355006	0	0.062402	0.0490971		SD609	6
GRMZM2G024024	5:125492673-125494727	2055	-	0.586335	1.02587	0.439901	0.517524	0.724373	0.293936	0.847652	0.964076		Shared	13
GRMZM2G024038	4:121809850-121812668	986	-	2.46475	3.29855	1.87066	9.50736	2.14788	1.76553	2.80495	2.26443
GRMZM2G024099	1:18188838-18190133	1296	+	4.645	50.3081	20.0796	52.7037	11.6351	24.4718	18.839	15.2825		Shared	12
GRMZM2G024104	1:267894482-267897634	1480	-	86.5617	88.4031	188.886	87.6053	101.241	155.78	197.326	65.3564		Shared	10
GRMZM2G024109	4:136513395-136517430	1257	+	1.19186	3.36249	9.98678	3.59307	5.34854	4.48051	6.50213	4.25866		SD609	1
GRMZM2G024131	1:262885479-262891683	1680	+	331.851	73.3396	134.418	84.296	280.677	93.0841	258.298	120.703		Shared	16
GRMZM2G024196	2:27121093-27125586	2178	+	0.412163	1.13112	0.1953	0.762244	0.628736	2.06625	0.551652	1.18166		Shared	5
GRMZM2G024260	5:137558686-137570240	873	-	5.12854	3.5923	2.76046	4.17095	2.79608	6.09742	4.07706	7.80391		HS68	2
GRMZM2G024267	1:298319497-298328419	1251	-	19.7422	20.6097	48.2696	29.1429	32.6075	27.4789	12.1098	15.6279		SD609	9
GRMZM2G024315	8:144270603-144273630	1376	-	41.86	108.751	256.303	81.1323	35.2766	44.8208	57.0601	44.3262		SD609	1
GRMZM2G024335	1:301161983-301181024	813	+	27.1043	13.2602	26.7501	11.9337	26.2542	18.0798	25.8514	24.683		SD609	8
GRMZM2G024348	3:210755027-210758952	1036	+	13.9614	21.3705	7.05379	8.13212	13.3149	8.69258	9.56876	8.8236		SD609	2
GRMZM2G024350	6:127715172-127716509	1338	-	0.0480743	0.742632	2.99965	0.7273	1.58129	1.32534	3.32461	0.0607858		Shared	10
GRMZM2G024354	7:8520267-8522456	880	-	672.233	261.499	542.154	318.374	621.422	371.84	520.44	504.025		SD609	3
GRMZM2G024391	3:210751340-210755558	837	-	3.82457	7.00753	6.31623	10.2142	4.71357	4.95011	5.74617	3.28359		SD609	4
GRMZM2G024435	1:28290899-28293415	2517	-	0.632527	0.747293	0.647522	0.472654	0.729278	0.704679	1.10969	0.740831
GRMZM2G024448	3:210749322-210750513	768	+	9.0992	19.5798	7.80708	7.39796	7.92302	5.88309	3.70983	9.2708		Shared	13
GRMZM2G024451	5:181892596-181893531	936	-	0.988369	0.966744	0	0.000380965	0.00116152	2.37168	0	0		Shared	5
GRMZM2G024466	10:130031324-130073246	3821	-	8.87819	11.5739	5.78481	8.74826	9.81835	10.0727	16.5409	8.24545		HS68	6
GRMZM2G024476	8:172364590-172368443	1605	+	0.582361	2.51813	1.50247	0.538451	1.63303	1.36232	2.62088	0.34368		Shared	10
GRMZM2G024482	4:26128801-26131541	1098	+	85.2312	52.3096	107.529	114.043	132.343	113.043	112.059	126.592		SD609	6
GRMZM2G024517	2:14229733-14229993	261	+	67.795	33.004	122.523	121.636	182.462	182.157	132.05	189.708		SD609	6
GRMZM2G024533	6:29642255-29646196	3942	-	2.32402	1.13226	0.00212532	0.000297533	1.4311	2.30322	2.43601	1.73008		SD609	7
GRMZM2G024550	5:181887633-181889995	1461	+	2.77245	3.96985	2.32654	3.44081	1.74224	2.28002	2.99486	1.80768		HS68	6
GRMZM2G024551	3:11006870-11007229	360	-	4.1551	9.04604	0	2.84588	3.0223	8.97312	3.72488	6.65085		Shared	1
GRMZM2G024561	5:162895228-162901289	564	+	5.28443	4.33713	3.80771	3.91546	7.74053	5.2548	9.43953	7.25853		HS68	3
GRMZM2G024563	4:23625369-23640490	813	+	110.589	50.579	45.0771	55.659	75.3864	69.1116	69.2609	89.5975		SD609	7
GRMZM2G024615	7:85004723-85010156	1647	+	4.77446	9.19674	10.0936	9.34874	6.93733	11.5882	5.62948	7.96385		SD609	1
GRMZM2G024641	2:225364989-225366147	1092	-	6.83715	6.60009	5.83842	5.12468	8.20744	7.79517	10.7578	5.91778		HS68	6
GRMZM2G024647-2	4:128262898-128297049	2891	-	313.532	115.044	329.848	199.556	334.206	272.531	186.51	219.031		SD609	8
GRMZM2G024655	8:5908375-5912322	722	-	9.07336	10.8447	19.7439	13.6366	14.9504	15.8758	17.4183	15.8588	C3H	SD609	9
GRMZM2G024668	1:184242195-184246817	2453	-	776.043	205.402	283.559	140.52	237.079	116.749	253.656	108.051		Shared	6
GRMZM2G024680	1:244764537-244772046	1244	+	164.672	200.529	78.3873	151.505	80.7609	35.5896	95.4408	140.105		Shared	13
[truncated: 13,925 more rows]
