# Supplementary material for: Comparative transcriptomics reveals the difference in early endosperm development between maize with different amylose contents
Source: PeerJ. 2019 Aug 28;7:e7528. doi: 10.7717/peerj.7528 (PMC6717500; doi:10.7717/peerj.7528)
Supplement: Table S7 [file peerj-07-7528-s014.xlsx]

## Sheet: SD609 and HS68
Table S7: qRT-PCR analysis of 21 genes.
SD609
Gene ID	Name	DAP	Bio-reps	Cт values	Cт Mean	Cт SD	ΔCт	ΔCт Mean(-actin)	ΔCт SE	ΔΔCt	ΔΔCt+	ΔΔCt-	RQ	RQmin	RQmax	RQ Mean	RQ SD
GRMZM2G450125	beta-amylase	5 DAP	1	24.2736	24.3728	0.362526	-7.77262	-7.67336	0.209304	0.0648998	0.645929	-0.516129	0.956012	0.639081	1.43011	0.910734	0.21618
			2	24.7746	24.3728		-7.27155	-7.67336	0.209304	0.565971	1.147	-0.0150587	0.675501	0.451563	1.01049
			3	24.0703	24.3728		-7.97592	-7.67336	0.209304	-0.138405	0.442624	-0.719435	1.10069	0.735795	1.64654
	Actin		1	31.4459	32.0462	0.522981
			2	32.2893	32.0462
			3	32.4034	32.0462
	beta-amylase	10 DAP	1	25.2259	25.3002	0.0923515	-7.62857	-7.5542	0.0533192	0.208944	0.356958	0.0609297	0.86517	0.780809	0.958646	0.822815	0.0519246
			2	25.2712	25.3002		-7.58321	-7.5542	0.0533192	0.254311	0.402325	0.106297	0.838388	0.756638	0.92897
			3	25.4036	25.3002		-7.45083	-7.5542	0.0533192	0.386684	0.534698	0.23867	0.764885	0.690303	0.847526
	Actin		1	32.3972	32.8544	0.401379
			2	33.1486	32.8544
			3	33.0175	32.8544
	beta-amylase	15 DAP	1	24.9874	24.6551	0.290468	-7.50521	-7.83752	0.167702	0.332304	0.797844	-0.133237	0.794267	0.575208	1.09675	1.01308	0.191956
			2	24.5284	24.6551		-7.96427	-7.83752	0.167702	-0.126751	0.338789	-0.592292	1.09183	0.790705	1.50764
			3	24.4496	24.6551		-8.04307	-7.83752	0.167702	-0.205553	0.259988	-0.671093	1.15313	0.835095	1.59228
	Actin		1	32.3574	32.4927	0.117156
			2	32.5616	32.4927
			3	32.5589	32.4927
	beta-amylase	20 DAP	1	25.5705	25.4781	0.08692	-8.07739	-8.16972	0.0501833	-0.239869	-0.10056	-0.379178	1.18089	1.07219	1.3006	1.26045	0.0754369
			2	25.3979	25.4781		-8.24996	-8.16972	0.0501833	-0.412443	-0.273135	-0.551752	1.33094	1.20843	1.46586
			3	25.466	25.4781		-8.18181	-8.16972	0.0501833	-0.344288	-0.20498	-0.483597	1.26952	1.15267	1.39823
	Actin		1	33.5995	33.6478	0.146841
			2	33.8128	33.6478
			3	33.5312	33.6478
GRMZM2G397687	Z1C (floury2)	5 DAP	1	18.4006	18.4756	0.0780631	-10.999	-10.924	0.0450697	-2.68007	-2.55496	-2.80519	6.40889	5.87652	6.9895	6.09015	0.328424
			2	18.4698	18.4756		-10.9298	-10.924	0.0450697	-2.61087	-2.48576	-2.73599	6.10874	5.6013	6.66215
			3	18.5564	18.4756		-10.8432	-10.924	0.0450697	-2.52427	-2.39916	-2.64939	5.75283	5.27495	6.274
	Actin		1	29.3867	29.3996	0.0547637
			2	29.3524	29.3996
			3	29.4597	29.3996
	Z1C (floury2)	10 DAP	1	15.4335	15.3863	0.202324	-13.0841	-13.1313	0.116812	-4.76518	-4.44091	-5.08945	27.1934	21.7194	34.0469	28.2849	4.04712
			2	15.1646	15.3863		-13.353	-13.1313	0.116812	-5.03412	-4.70985	-5.35839	32.7659	26.1702	41.0239
			3	15.5609	15.3863		-12.9567	-13.1313	0.116812	-4.63782	-4.31355	-4.96209	24.8955	19.8841	31.17
	Actin		1	28.4065	28.5176	0.0996746
			2	28.5472	28.5176
			3	28.5991	28.5176
	Z1C (floury2)	15 DAP	1	21.7494	21.7591	0.158642	-8.32861	-8.3189	0.0915919	-0.0097048	0.244554	-0.263964	1.00675	0.844076	1.20077	1.00402	0.109685
			2	21.9224	21.7591		-8.15563	-8.3189	0.0915919	0.163271	0.417531	-0.0909877	0.892998	0.748705	1.0651
			3	21.6056	21.7591		-8.47247	-8.3189	0.0915919	-0.153567	0.100692	-0.407826	1.11232	0.932585	1.32668
	Actin		1	30.1229	30.0781	0.0995242
			2	30.1473	30.0781
			3	29.964	30.0781
	Z1C (floury2)	20 DAP	1	16.8974	16.484	0.365735	-12.2675	-12.681	0.211157	-3.94863	-3.36246	-4.5348	15.4403	10.2849	23.1799	20.9902	4.95986
			2	16.2028	16.484		-12.9622	-12.681	0.211157	-4.64326	-4.05709	-5.22943	24.9897	16.6459	37.516
			3	16.3516	16.484		-12.8133	-12.681	0.211157	-4.49444	-3.90827	-5.08061	22.5404	15.0144	33.839
	Actin		1	29.2892	29.165	0.112913
			2	29.0686	29.165
			3	29.1372	29.165
GRMZM2G008263	GBSSI	5 DAP	1	26.083	26.0518	0.0417048	-1.16161	-1.19288	0.0240783	0.456713	0.523554	0.389871	0.728645	0.695656	0.763198	0.744818	0.0216813
			2	26.0679	26.0518		-1.17679	-1.19288	0.0240783	0.441525	0.508366	0.374684	0.736356	0.703018	0.771274
			3	26.0044	26.0518		-1.24023	-1.19288	0.0240783	0.378092	0.444933	0.31125	0.769455	0.734619	0.805943
	Actin		1	27.3162	27.2447	0.0640534
			2	27.2252	27.2447
			3	27.1926	27.2447
	GBSSI	10 DAP	1	24.544	24.5208	0.0298722	-2.23817	-2.26133	0.0172467	-0.619852	-0.571976	-0.667729	1.53672	1.48656	1.58857	1.56181	0.0324917
			2	24.4871	24.5208		-2.29505	-2.26133	0.0172467	-0.67673	-0.628853	-0.724607	1.59851	1.54633	1.65245
			3	24.5313	24.5208		-2.25077	-2.26133	0.0172467	-0.632455	-0.584578	-0.680332	1.5502	1.4996	1.60251
	Actin		1	26.7313	26.7821	0.054805
			2	26.8402	26.7821
			3	26.7749	26.7821
	GBSSI	15 DAP	1	26.924	26.4694	0.393711	-1.16371	-1.61832	0.227309	0.454611	1.08562	-0.176398	0.729707	0.471189	1.13006	1.02367	0.254583
			2	26.2442	26.4694		-1.84353	-1.61832	0.227309	-0.225207	0.405803	-0.856217	1.16894	0.754816	1.81028
			3	26.24	26.4694		-1.84772	-1.61832	0.227309	-0.229404	0.401605	-0.860414	1.17235	0.757016	1.81556
	Actin		1	28.1481	28.0877	0.0603785
			2	28.0273	28.0877
			3	28.0878	28.0877
	GBSSI	20 DAP	1	24.7686	24.8987	0.121754	-2.34068	-2.21064	0.0702949	-0.722359	-0.52722	-0.917497	1.64988	1.44115	1.88884	1.51128	0.128632
			2	24.9174	24.8987		-2.19191	-2.21064	0.0702949	-0.573589	-0.37845	-0.768727	1.48822	1.29994	1.70377
			3	25.01	24.8987		-2.09934	-2.21064	0.0702949	-0.481022	-0.285883	-0.67616	1.39573	1.21916	1.59788
	Actin		1	27.013	27.1093	0.0840148
			2	27.1478	27.1093
			3	27.1672	27.1093
GRMZM2G090905	iso2	5 DAP	1	30.2394	30.1385	0.127166	-1.80674	-1.90765	0.0734191	-0.89864	-0.694828	-1.10245	1.86431	1.61869	2.14719	2.00462	0.179913
			2	29.9957	30.1385		-2.05048	-1.90765	0.0734191	-1.14238	-0.938571	-1.34619	2.20745	1.91663	2.5424
			3	30.1805	30.1385		-1.86572	-1.90765	0.0734191	-0.957618	-0.753807	-1.16143	1.9421	1.68624	2.23679
	Actin		1	31.4459	32.0462	0.522981
			2	32.2893	32.0462
			3	32.4034	32.0462
	iso2	10 DAP	1	30.0747	30.0064	0.0593962	-1.77975	-1.848	0.0342924	-0.871653	-0.776457	-0.966849	1.82976	1.71292	1.95457	1.91948	0.0781059
			2	29.9782	30.0064		-1.87627	-1.848	0.0342924	-0.968169	-0.872973	-1.06336	1.95636	1.83143	2.0898
			3	29.9665	30.0064		-1.88799	-1.848	0.0342924	-0.979888	-0.884692	-1.07508	1.97231	1.84637	2.10684
	Actin		1	31.3972	31.8544	0.401379
			2	32.1486	31.8544
			3	32.0175	31.8544
	iso2	15 DAP	1	31.7096	31.5846	0.117412	-0.783088	-0.9081	0.0677876	0.125012	0.31319	-0.0631665	0.916996	0.80486	1.04476	1.0022	0.0807854
			2	31.4766	31.5846		-1.01604	-0.9081	0.0677876	-0.107943	0.0802357	-0.296121	1.07769	0.945903	1.22784
			3	31.5675	31.5846		-0.925169	-0.9081	0.0677876	-0.0170691	0.171109	-0.205248	1.0119	0.88816	1.15288
	Actin		1	32.3574	32.4927	0.117156
			2	32.5616	32.4927
			3	32.5589	32.4927
	iso2	20 DAP	1	32.1018	32.1729	0.0629667	-1.13974	-1.0686	0.0363539	-0.231635	-0.130717	-0.332553	1.17416	1.09484	1.25924	1.11839	0.0492965
			2	32.2215	32.1729		-1.02001	-1.0686	0.0363539	-0.111908	-0.0109897	-0.212826	1.08066	1.00765	1.15896
			3	32.1954	32.1729		-1.04606	-1.0686	0.0363539	-0.137956	-0.0370372	-0.238874	1.10034	1.026	1.18007
	Actin		1	33.3805	33.2415	0.378877
			2	32.8128	33.2415
			3	33.5312	33.2415
GRMZM2G015534	o2	5 DAP	1	20.6627	20.8155	0.347536	-6.76802	-6.61527	0.20065	-2.15706	-1.60005	-2.71406	4.46004	3.03154	6.56166	4.08662	0.913797
			2	21.2132	20.8155		-6.21752	-6.61527	0.20065	-1.60656	-1.04956	-2.16357	3.04525	2.06989	4.48021
			3	20.5705	20.8155		-6.86028	-6.61527	0.20065	-2.24932	-1.69231	-2.80632	4.75457	3.23174	6.99498
	Actin		1	27.508	27.4307	0.352635
			2	27.7383	27.4307
			3	27.0458	27.4307
	o2	10 DAP	1	22.7485	22.633	0.516204	-5.90573	-6.02123	0.29803	-1.29477	-0.467438	-2.1221	2.45338	1.38265	4.35328	2.77687	1.02998
			2	23.0817	22.633		-5.57256	-6.02123	0.29803	-0.961603	-0.13427	-1.78894	1.94747	1.09754	3.4556
			3	22.0688	22.633		-6.5854	-6.02123	0.29803	-1.97444	-1.14711	-2.80177	3.92976	2.2147	6.97298
	Actin		1	28.0959	28.6542	0.556704
			2	29.2093	28.6542
			3	28.6574	28.6542
	o2	15 DAP	1	24.5069	24.4749	0.16195	-4.57888	-4.61096	0.0935018	0.0320834	0.291644	-0.227478	0.978007	0.81697	1.17079	1.00425	0.114337
			2	24.2993	24.4749		-4.78655	-4.61096	0.0935018	-0.17559	0.0839707	-0.435151	1.12943	0.943457	1.35205
			3	24.6184	24.4749		-4.46745	-4.61096	0.0935018	0.143507	0.403068	-0.116054	0.905316	0.756248	1.08377
	Actin		1	29.3736	29.0858	0.2911
			2	28.7915	29.0858
			3	29.0924	29.0858
	o2	20 DAP	1	22.5112	22.5841	0.27479	-6.70114	-6.62827	0.15865	-2.09018	-1.64977	-2.53059	4.25801	3.13783	5.77808	4.09624	0.749167
			2	22.353	22.5841		-6.85928	-6.62827	0.15865	-2.24832	-1.80791	-2.68873	4.7513	3.50135	6.44748
			3	22.8879	22.5841		-6.32439	-6.62827	0.15865	-1.71343	-1.27302	-2.15384	3.2794	2.41667	4.45012
	Actin		1	28.7062	29.2123	0.444008
			2	29.5361	29.2123
			3	29.3947	29.2123
GRMZM2G348551	sugary2	5 DAP	1	28.5967	28.6992	0.189283	-1.06744	-0.964879	0.109282	-0.933764	-0.630396	-1.23713	1.91025	1.54799	2.3573	1.78913	0.225287
			2	28.5834	28.6992		-1.08074	-0.964879	0.109282	-0.947062	-0.643694	-1.25043	1.92794	1.56232	2.37912
			3	28.9177	28.6992		-0.746449	-0.964879	0.109282	-0.612768	-0.3094	-0.916136	1.52919	1.23919	1.88705
	Actin		1	29.3732	29.6641	0.407986
			2	29.4886	29.6641
			3	30.1305	29.6641
	sugary2	10 DAP	1	31.1386	31.2764	0.145745	1.47645	1.61427	0.0841458	1.61013	1.84372	1.37654	0.32757	0.278603	0.385142	0.298733	0.0299119
			2	31.4289	31.2764		1.76682	1.61427	0.0841458	1.9005	2.13409	1.66691	0.267851	0.227811	0.314927
			3	31.2617	31.2764		1.59955	1.61427	0.0841458	1.73323	1.96682	1.49964	0.300778	0.255817	0.353642
	Actin		1	29.6446	29.6621	0.442059
			2	29.2291	29.6621
			3	30.1127	29.6621
	sugary2	15 DAP	1	30.0705	30.2709	0.232164	-0.334023	-0.13368	0.13404	-0.200343	0.171753	-0.572438	1.14897	0.887764	1.48703	1.0085	0.157444
			2	30.5253	30.2709		0.120755	-0.13368	0.13404	0.254435	0.626531	-0.11766	0.838315	0.647732	1.08497
			3	30.2168	30.2709		-0.187773	-0.13368	0.13404	-0.0540924	0.318003	-0.426188	1.03821	0.802179	1.34368
	Actin		1	30.2325	30.4046	0.167784
			2	30.4134	30.4046
			3	30.5678	30.4046
	sugary2	20 DAP	1	29.2968	29.209	0.110797	-0.622547	-0.710366	0.0639684	-0.488867	-0.311291	-0.666443	1.40334	1.24082	1.58716	1.49439	0.116608
			2	29.2456	29.209		-0.673703	-0.710366	0.0639684	-0.540022	-0.362446	-0.717599	1.454	1.2856	1.64444
			3	29.0845	29.209		-0.834847	-0.710366	0.0639684	-0.701166	-0.52359	-0.878743	1.62582	1.43753	1.83877
	Actin		1	29.8703	29.9193	0.157051
			2	29.7926	29.9193
			3	30.095	29.9193
GRMZM2G024993	wx1	5 DAP	1	22.2614	22.646	0.34608	-4.47843	-4.0938	0.19981	-3.64949	-3.09482	-4.20416	12.5489	8.54344	18.4322	9.8032	2.44014
			2	22.9322	22.646		-3.80759	-4.0938	0.19981	-2.97865	-2.42398	-3.53332	7.88249	5.36649	11.5781
			3	22.7445	22.646		-3.99537	-4.0938	0.19981	-3.16643	-2.61176	-3.7211	8.97821	6.11248	13.1875
	Actin		1	26.6916	26.7398	0.189483
			2	26.5791	26.7398
			3	26.9488	26.7398
	wx1	10 DAP	1	21.9131	21.846	0.0580695	-4.8172	-4.88423	0.0335264	-3.98825	-3.89519	-4.08132	15.8703	14.8788	16.9278	16.634	0.661594
			2	21.8112	21.846		-4.91908	-4.88423	0.0335264	-4.09014	-3.99707	-4.18321	17.0316	15.9675	18.1665
			3	21.8138	21.846		-4.91642	-4.88423	0.0335264	-4.08748	-3.99441	-4.18055	17.0002	15.9381	18.133
	Actin		1	26.7442	26.7303	0.292324
			2	26.4312	26.7303
			3	27.0154	26.7303
	wx1	15 DAP	1	27.3466	27.0892	0.282322	-0.571589	-0.828941	0.162998	0.257352	0.709836	-0.195132	0.836622	0.61139	1.14483	1.013	0.201648
			2	26.7872	27.0892		-1.13092	-0.828941	0.162998	-0.301976	0.150507	-0.75446	1.23283	0.900934	1.687
			3	27.1338	27.0892		-0.784316	-0.828941	0.162998	0.0446247	0.497108	-0.407859	0.969542	0.708525	1.32672
	Actin		1	28.0526	27.9182	0.119669
			2	27.8232	27.9182
			3	27.8787	27.9182
	wx1	20 DAP	1	21.2829	21.4	0.18823	-5.96728	-5.85017	0.108675	-5.13834	-4.83666	-5.44002	35.2203	28.5745	43.4119	32.6543	4.09059
			2	21.3	21.4		-5.95019	-5.85017	0.108675	-5.12125	-4.81957	-5.42293	34.8057	28.2381	42.9008
			3	21.6171	21.4		-5.63305	-5.85017	0.108675	-4.80411	-4.50242	-5.10579	27.937	22.6655	34.4346
	Actin		1	27.6288	27.2502	0.329775
			2	27.0256	27.2502
			3	27.0961	27.2502
GRMZM2G129674	ERF	5 DAP	1	26.0387	26.2258	0.190923	-1.62785	-1.44075	0.110229	-1.84601	-1.54001	-2.152	3.59504	2.90797	4.44445	3.17619	0.4178
			2	26.2184	26.2258		-1.44818	-1.44075	0.110229	-1.66634	-1.36035	-1.97234	3.17409	2.56747	3.92404
			3	26.4203	26.2258		-1.24622	-1.44075	0.110229	-1.46438	-1.15838	-1.77037	2.75945	2.23207	3.41143
	Actin		1	27.7835	27.6666	0.106136
			2	27.5764	27.6666
			3	27.6397	27.6666
	ERF	10 DAP	1	26.1583	26.2324	0.0733518	-1.03892	-0.964808	0.0423497	-1.25708	-1.13952	-1.37464	2.39011	2.20307	2.59304	2.27239	0.115592
			2	26.234	26.2324		-0.963262	-0.964808	0.0423497	-1.18142	-1.06386	-1.29898	2.268	2.09052	2.46056
			3	26.305	26.2324		-0.892241	-0.964808	0.0423497	-1.1104	-0.992838	-1.22796	2.15906	1.9901	2.34236
	Actin		1	27.1583	27.1972	0.0457888
			2	27.1857	27.1972
			3	27.2477	27.1972
	ERF	15 DAP	1	27.6177	27.4375	0.156585	0.3984	0.218159	0.0904042	0.18024	0.431202	-0.0707217	0.882556	0.741644	1.05024	1.00385	0.105442
			2	27.335	27.4375		0.115636	0.218159	0.0904042	-0.102523	0.148439	-0.353485	1.07365	0.902226	1.27764
			3	27.3598	27.4375		0.140442	0.218159	0.0904042	-0.0777172	0.173245	-0.328679	1.05535	0.886846	1.25586
	Actin		1	27.2773	27.2193	0.0891329
			2	27.1167	27.2193
			3	27.264	27.2193
	ERF	20 DAP	1	26.827	26.7914	0.0465614	-0.896957	-0.932528	0.0268823	-1.11512	-1.04049	-1.18974	2.16612	2.05693	2.28112	2.22097	0.0722197
			2	26.7387	26.7914		-0.985228	-0.932528	0.0268823	-1.20339	-1.12876	-1.27801	2.3028	2.18671	2.42505
			3	26.8085	26.7914		-0.915401	-0.932528	0.0268823	-1.13356	-1.05894	-1.20819	2.194	2.08339	2.31047
	Actin		1	27.5677	27.7239	0.14143
			2	27.7609	27.7239
			3	27.8432	27.7239
GRMZM2G099522	MADS	5 DAP	1	22.3802	22.4574	0.367459	-6.95061	-6.87333	0.212153	1.16985	1.75879	0.580916	0.444467	0.295496	0.668539	0.43021	0.104528
			2	22.1348	22.4574		-7.196	-6.87333	0.212153	0.92446	1.5134	0.335524	0.526878	0.350286	0.792496
			3	22.8574	22.4574		-6.47338	-6.87333	0.212153	1.64709	2.23602	1.05815	0.319284	0.212271	0.480248
	Actin		1	29.3732	29.3308	0.182817
			2	29.4886	29.3308
			3	29.1305	29.3308
	MADS	10 DAP	1	23.2755	23.435	0.307595	-7.05327	-6.89377	0.17759	1.06719	1.56018	0.574204	0.477246	0.339108	0.671657	0.433531	0.0862427
			2	23.2399	23.435		-7.08885	-6.89377	0.17759	1.03161	1.5246	0.538624	0.489163	0.347575	0.688427
			3	23.7896	23.435		-6.53918	-6.89377	0.17759	1.58128	2.07427	1.08829	0.334185	0.237455	0.470318
	Actin		1	30.6446	30.3288	0.279648
			2	30.2291	30.3288
			3	30.1127	30.3288
	MADS	15 DAP	1	22.2737	22.2841	0.362785	-8.13086	-8.12046	0.209454	-0.0103967	0.571048	-0.591842	1.00723	0.673127	1.50717	1.02111	0.253414
			2	22.652	22.2841		-7.75259	-8.12046	0.209454	0.367872	0.949317	-0.213573	0.774925	0.517878	1.15956
			3	21.9266	22.2841		-8.47794	-8.12046	0.209454	-0.357475	0.22397	-0.93892	1.28118	0.856206	1.91709
	Actin		1	30.2325	30.4046	0.167784
			2	30.4134	30.4046
			3	30.5678	30.4046
	MADS	20 DAP	1	23.9171	24.0477	0.285697	-6.00221	-5.87165	0.164947	2.11825	2.57614	1.66036	0.230326	0.167689	0.316361	0.213057	0.0396967
			2	23.8506	24.0477		-6.06873	-5.87165	0.164947	2.05173	2.50962	1.59384	0.241195	0.175602	0.33129
			3	24.3753	24.0477		-5.544	-5.87165	0.164947	2.57647	3.03436	2.11857	0.167651	0.122058	0.230275
	Actin		1	29.8703	29.9193	0.157051
			2	29.7926	29.9193
			3	30.095	29.9193
GRMZM2G158043	zpu1	5 DAP	1	27.7872	27.4286	0.314995	-0.577577	-0.936196	0.181862	-0.568917	-0.0640665	-1.07377	1.48341	1.04541	2.10492	1.93125	0.395714
			2	27.1967	27.4286		-1.1681	-0.936196	0.181862	-1.15944	-0.65459	-1.66429	2.23371	1.57417	3.16958
			3	27.3019	27.4286		-1.06291	-0.936196	0.181862	-1.05425	-0.549399	-1.5591	2.07664	1.46348	2.9467
	Actin		1	28.6093	28.3648	0.243615
			2	28.1221	28.3648
			3	28.363	28.3648
	zpu1	10 DAP	1	26.5639	26.7787	0.189735	-1.38522	-1.17047	0.109543	-1.37656	-1.07247	-1.68065	2.59649	2.10303	3.20573	2.25056	0.304418
			2	26.9236	26.7787		-1.02555	-1.17047	0.109543	-1.01689	-0.712797	-1.32098	2.02355	1.63898	2.49836
			3	26.8485	26.7787		-1.10062	-1.17047	0.109543	-1.09196	-0.787871	-1.39606	2.13164	1.72653	2.63181
	Actin		1	27.9223	27.9491	0.042582
			2	27.9269	27.9491
			3	27.9982	27.9491
	zpu1	15 DAP	1	29.3645	29.1673	0.171818	0.188511	-0.00866006	0.0991994	0.197171	0.472549	-0.0782064	0.872259	0.72069	1.0557	1.00463	0.115509
			2	29.0496	29.1673		-0.12633	-0.00866006	0.0991994	-0.11767	0.157707	-0.393048	1.08498	0.896449	1.31316
			3	29.0878	29.1673		-0.0881609	-0.00866006	0.0991994	-0.0795008	0.195877	-0.354878	1.05665	0.873042	1.27888
	Actin		1	29.2336	29.1759	0.0569338
			2	29.1197	29.1759
			3	29.1745	29.1759
	zpu1	20 DAP	1	26.9378	26.7038	0.359909	-1.04896	-1.28297	0.207794	-1.0403	-0.463461	-1.61713	2.05665	1.37885	3.06764	2.47163	0.652522
			2	26.8842	26.7038		-1.10255	-1.28297	0.207794	-1.09389	-0.517056	-1.67073	2.13449	1.43103	3.18375
			3	26.2894	26.7038		-1.6974	-1.28297	0.207794	-1.68874	-1.11191	-2.26558	3.22376	2.16131	4.80847
	Actin		1	28.1098	27.9868	0.127008
			2	27.9944	27.9868
			3	27.8561	27.9868
GRMZM2G138727	27-kD γ-zein	5 DAP	1	13.2461	13.1911	0.0734482	-12.913	-12.968	0.0424054	-1.85247	-1.73476	-1.97019	3.61119	3.32823	3.9182	3.75474	0.193478
			2	13.1077	13.1911		-13.0514	-12.968	0.0424054	-1.99087	-1.87315	-2.10859	3.97477	3.66332	4.31269
			3	13.2195	13.1911		-12.9396	-12.968	0.0424054	-1.87903	-1.76131	-1.99674	3.67827	3.39006	3.99098
	Actin		1	26.2166	26.1591	0.0498986
			2	26.127	26.1591
			3	26.1337	26.1591
	27-kD γ-zein	10 DAP	1	12.2179	12.254	0.0387578	-13.7308	-13.6948	0.0223769	-2.6703	-2.60818	-2.73242	6.36561	6.09734	6.64568	6.2099	0.166395
			2	12.2491	12.254		-13.6997	-13.6948	0.0223769	-2.63913	-2.57701	-2.70125	6.22955	5.96701	6.50363
			3	12.2949	12.254		-13.6538	-13.6948	0.0223769	-2.59325	-2.53113	-2.65537	6.03456	5.78024	6.30007
	Actin		1	25.9965	25.9487	0.103184
			2	25.8303	25.9487
			3	26.0194	25.9487
	27-kD γ-zein	15 DAP	1	16.0856	16.1409	0.109277	-11.1158	-11.0605	0.0630909	-0.055283	0.119857	-0.230423	1.03906	0.920279	1.17318	1.00189	0.074197
			2	16.0703	16.1409		-11.1311	-11.0605	0.0630909	-0.0705889	0.104551	-0.245729	1.05015	0.930094	1.18569
			3	16.2667	16.1409		-10.9347	-11.0605	0.0630909	0.125872	0.301012	-0.0492684	0.91645	0.811683	1.03474
	Actin		1	27.249	27.2014	0.0449446
			2	27.1955	27.2014
			3	27.1597	27.2014
	27-kD γ-zein	20 DAP	1	12.1944	12.1686	0.0346696	-14.0925	-14.1183	0.0200165	-3.03199	-2.97643	-3.08756	8.17938	7.87034	8.50056	8.32831	0.201321
			2	12.1823	12.1686		-14.1046	-14.1183	0.0200165	-3.04408	-2.98851	-3.09964	8.24819	7.93655	8.57206
			3	12.1292	12.1686		-14.1577	-14.1183	0.0200165	-3.09716	-3.0416	-3.15273	8.55735	8.23403	8.89337
	Actin		1	26.2855	26.2869	0.00459081
			2	26.2832	26.2869
			3	26.292	26.2869
HS68
Gene ID	Name	DAP	Bio-reps	Cт values	Cт Mean	Cт SD	ΔCт	ΔCт Mean(-actin)	ΔCт SE	ΔΔCt	ΔΔCt+	ΔΔCt-	RQ	RQmin	RQmax	RQ Mean	RQ SD
GRMZM2G450125	beta-amylase	5 DAP	1	24.8881	24.9054	0.0467459	-5.77919	-5.7619	0.0269887	1.70858	1.7835	1.63366	0.305961	0.290477	0.322269	0.302421	0.00972141
			2	24.8698	24.9054		-5.79754	-5.7619	0.0269887	1.69023	1.76515	1.61531	0.309877	0.294195	0.326394
			3	24.9584	24.9054		-5.70897	-5.7619	0.0269887	1.7788	1.85372	1.70388	0.291426	0.276678	0.30696
	Actin		1	31.2234	30.6673	0.497719
			2	30.515	30.6673
			3	30.2636	30.6673
	beta-amylase	10 DAP	1	25.4141	25.6312	0.193586	-6.39945	-6.1824	0.111767	1.08832	1.39859	0.77806	0.470307	0.3793	0.583151	0.407095	0.0560523
			2	25.786	25.6312		-6.02758	-6.1824	0.111767	1.46019	1.77045	1.14992	0.363446	0.293117	0.45065
			3	25.6934	25.6312		-6.12016	-6.1824	0.111767	1.36761	1.67788	1.05735	0.387532	0.312542	0.480514
	Actin		1	32.2472	31.8136	0.662247
			2	31.0513	31.8136
			3	32.1423	31.8136
	beta-amylase	15 DAP	1	24.5002	24.2566	0.34869	-7.24411	-7.48777	0.201316	0.24366	0.802513	-0.315194	0.8446	0.57335	1.24418	1.02041	0.259923
			2	24.4124	24.2566		-7.33201	-7.48777	0.201316	0.155761	0.714615	-0.403092	0.897659	0.609368	1.32234
			3	23.8572	24.2566		-7.88719	-7.48777	0.201316	-0.399421	0.159432	-0.958274	1.31898	0.895377	1.94298
	Actin		1	31.1099	31.7444	0.616624
			2	31.7817	31.7444
			3	32.3415	31.7444
	beta-amylase	20 DAP	1	25.8531	25.8299	0.0641359	-4.07818	-4.10136	0.0370289	3.40959	3.51239	3.3068	0.0941045	0.0876328	0.101054	0.0956926	0.00429733
			2	25.7574	25.8299		-4.17387	-4.10136	0.0370289	3.3139	3.41669	3.21111	0.100558	0.0936425	0.107984
			3	25.8792	25.8299		-4.05205	-4.10136	0.0370289	3.43572	3.53852	3.33293	0.0924154	0.0860599	0.0992402
	Actin		1	29.5956	29.9313	0.459446
			2	30.4549	29.9313
			3	29.7434	29.9313
GRMZM2G397687	Z1C (floury2)	5 DAP	1	20.3696	20.178	0.166151	-8.90428	-9.09586	0.0959272	-1.23701	-0.970719	-1.50331	2.3571	1.95982	2.83492	2.70349	0.30051
			2	20.0912	20.178		-9.18269	-9.09586	0.0959272	-1.51543	-1.24913	-1.78172	2.85883	2.37698	3.43836
			3	20.0733	20.178		-9.20059	-9.09586	0.0959272	-1.53333	-1.26703	-1.79962	2.89453	2.40666	3.48129
	Actin		1	29.5505	29.2739	0.251301
			2	29.0596	29.2739
			3	29.2116	29.2739
	Z1C (floury2)	10 DAP	1	18.6141	18.6401	0.0226887	-10.7998	-10.7738	0.0130993	-3.13258	-3.09622	-3.16894	8.77001	8.55172	8.99387	8.614	0.13604
			2	18.6504	18.6401		-10.7635	-10.7738	0.0130993	-3.09624	-3.05987	-3.1326	8.55184	8.33898	8.77013
			3	18.6558	18.6401		-10.7581	-10.7738	0.0130993	-3.09088	-3.05451	-3.12724	8.52014	8.30807	8.73762
	Actin		1	29.2466	29.4139	0.158303
			2	29.4337	29.4139
			3	29.5614	29.4139
	Z1C (floury2)	15 DAP	1	20.6661	20.7068	0.0465433	-7.70799	-7.66727	0.0268718	-0.0407212	0.0338749	-0.115317	1.02863	0.976793	1.08321	1.00035	0.0321078
			2	20.6968	20.7068		-7.67728	-7.66727	0.0268718	-0.010014	0.0645821	-0.0846101	1.00697	0.956222	1.0604
			3	20.7576	20.7068		-7.61653	-7.66727	0.0268718	0.0507352	0.125331	-0.0238609	0.965444	0.916793	1.01668
	Actin		1	28.3012	28.3741	0.251364
			2	28.6538	28.3741
			3	28.1672	28.3741
	Z1C (floury2)	20 DAP	1	17.294	17.4158	0.32871	-10.8616	-10.7398	0.189781	-3.19438	-2.66755	-3.72121	9.15384	6.35347	13.1885	8.55348	1.82928
			2	17.7881	17.4158		-10.3676	-10.7398	0.189781	-2.70032	-2.17349	-3.22715	6.49946	4.51113	9.36417
			3	17.1654	17.4158		-10.9902	-10.7398	0.189781	-3.32296	-2.79613	-3.84979	10.0071	6.94573	14.4179
	Actin		1	28.1875	28.1557	0.0611373
			2	28.1943	28.1557
			3	28.0852	28.1557
GRMZM2G008263	GBSSI	5 DAP	1	25.774	25.6266	0.135465	-1.00142	-1.14884	0.0782108	-0.147233	0.0698798	-0.364347	1.10744	0.952717	1.2873	1.23016	0.113746
			2	25.5076	25.6266		-1.26785	-1.14884	0.0782108	-0.413658	-0.196545	-0.630772	1.33206	1.14595	1.54839
			3	25.5982	25.6266		-1.17724	-1.14884	0.0782108	-0.323057	-0.105943	-0.54017	1.25098	1.0762	1.45414
	Actin		1	26.7789	26.7754	0.00883113
			2	26.7654	26.7754
			3	26.782	26.7754
	GBSSI	10 DAP	1	25.2838	24.9879	0.257665	-2.02248	-2.31841	0.148763	-1.16829	-0.755328	-1.58126	2.24746	1.68802	2.99231	2.78761	0.471175
			2	24.8133	24.9879		-2.49301	-2.31841	0.148763	-1.63882	-1.22586	-2.05179	3.11412	2.33895	4.1462
			3	24.8666	24.9879		-2.43975	-2.31841	0.148763	-1.58556	-1.17259	-1.99853	3.00124	2.25417	3.99592
	Actin		1	27.3937	27.3063	0.0773313
			2	27.2467	27.3063
			3	27.2786	27.3063
	GBSSI	15 DAP	1	25.2062	25.258	0.0464816	-0.906048	-0.854187	0.0268361	-0.0518614	0.0226358	-0.126359	1.0366	0.984433	1.09154	1.00035	0.0324376
			2	25.2959	25.258		-0.816284	-0.854187	0.0268361	0.0379029	0.1124	-0.0365942	0.97407	0.925048	1.02569
			3	25.272	25.258		-0.840229	-0.854187	0.0268361	0.0139585	0.0884556	-0.0605387	0.990371	0.940529	1.04286
	Actin		1	26.1255	26.1122	0.0601909
			2	26.0465	26.1122
			3	26.1646	26.1122
	GBSSI	20 DAP	1	26.2764	26.2867	0.0458475	-0.342019	-0.331769	0.02647	0.512168	0.585649	0.438687	0.701168	0.66635	0.737806	0.696438	0.0220171
			2	26.3368	26.2867		-0.281664	-0.331769	0.02647	0.572523	0.646004	0.499042	0.67244	0.639048	0.707577
			3	26.2468	26.2867		-0.371624	-0.331769	0.02647	0.482563	0.556044	0.409082	0.715705	0.680165	0.753102
	Actin		1	26.6374	26.6185	0.0483589
			2	26.6545	26.6185
			3	26.5635	26.6185
GRMZM2G090905	iso2	5 DAP	1	30.0975	29.8648	0.220677	-1.29054	-1.52326	0.127408	-0.113567	0.240116	-0.467251	1.0819	0.846677	1.38247	1.28113	0.192744
			2	29.6586	29.8648		-1.72951	-1.52326	0.127408	-0.552532	-0.198848	-0.906216	1.46666	1.14778	1.87412
			3	29.8383	29.8648		-1.54974	-1.52326	0.127408	-0.372762	-0.0190786	-0.726446	1.29483	1.01331	1.65456
	Actin		1	31.2234	31.3881	0.149415
			2	31.515	31.3881
			3	31.4258	31.3881
	iso2	10 DAP	1	30.3246	30.3623	0.124358	-1.15567	-1.11794	0.0717979	0.0213033	0.220614	-0.178008	0.985342	0.8582	1.13132	0.962261	0.0813828
			2	30.2612	30.3623		-1.21907	-1.11794	0.0717979	-0.0420975	0.157214	-0.241409	1.02961	0.896755	1.18215
			3	30.5012	30.3623		-0.979093	-1.11794	0.0717979	0.197881	0.397192	-0.00143013	0.87183	0.759335	1.00099
	Actin		1	31.2472	31.4803	0.497311
			2	32.0513	31.4803
			3	31.1423	31.4803
	iso2	15 DAP	1	30.491	30.3097	0.24358	-0.995697	-1.17697	0.140631	0.181277	0.571669	-0.209115	0.881922	0.672838	1.15598	1.00979	0.176816
			2	30.4053	30.3097		-1.08137	-1.17697	0.140631	0.0956019	0.485994	-0.29479	0.935882	0.714005	1.22671
			3	30.0328	30.3097		-1.45385	-1.17697	0.140631	-0.276879	0.113514	-0.667271	1.21157	0.924334	1.58807
	Actin		1	31.1099	31.4867	0.343233
			2	31.7817	31.4867
			3	31.5684	31.4867
	iso2	20 DAP	1	29.0848	29.7257	0.555161	-2.51315	-1.87221	0.320523	-1.33618	-0.446406	-2.22595	2.52481	1.36264	4.67818	1.70605	0.70913
			2	30.0564	29.7257		-1.54155	-1.87221	0.320523	-0.364574	0.525197	-1.25434	1.2875	0.694864	2.38559
			3	30.036	29.7257		-1.56194	-1.87221	0.320523	-0.384969	0.504802	-1.27474	1.30583	0.704757	2.41955
	Actin		1	31.5956	31.598	0.144249
			2	31.4549	31.598
			3	31.7434	31.598
GRMZM2G015534	o2	5 DAP	1	21.6541	21.7915	0.170459	-7.75491	-7.61748	0.0984147	-1.62931	-1.35611	-1.90251	3.09365	2.55994	3.73862	2.82542	0.324852
			2	21.9823	21.7915		-7.42674	-7.61748	0.0984147	-1.30113	-1.02793	-1.57433	2.46422	2.0391	2.97797
			3	21.7382	21.7915		-7.67078	-7.61748	0.0984147	-1.54518	-1.27198	-1.81837	2.9184	2.41492	3.52684
	Actin		1	29.6037	29.409	0.495185
			2	29.7773	29.409
			3	28.8461	29.409
	o2	10 DAP	1	21.4219	21.3753	0.115593	-7.99829	-8.04493	0.0667376	-1.87268	-1.68742	-2.05794	3.66213	3.2208	4.16393	3.79068	0.309563
			2	21.4603	21.3753		-7.95995	-8.04493	0.0667376	-1.83435	-1.64908	-2.01961	3.5661	3.13635	4.05475
			3	21.2437	21.3753		-8.17656	-8.04493	0.0667376	-2.05096	-1.86569	-2.23622	4.14381	3.64443	4.71161
	Actin		1	29.4327	29.4202	0.0335156
			2	29.4457	29.4202
			3	29.3823	29.4202
	o2	15 DAP	1	22.0524	22.3296	0.346513	-6.40285	-6.12561	0.200059	-0.277242	0.278123	-0.832606	1.21188	0.824663	1.7809	1.01865	0.230212
			2	22.2184	22.3296		-6.23683	-6.12561	0.200059	-0.111227	0.444137	-0.666591	1.08015	0.735024	1.58732
			3	22.7181	22.3296		-5.73714	-6.12561	0.200059	0.388469	0.943833	-0.166896	0.76394	0.51985	1.12264
	Actin		1	28.0428	28.4552	0.436368
			2	28.9121	28.4552
			3	28.4108	28.4552
	o2	20 DAP	1	21.3966	21.4931	0.212978	-8.20171	-8.10519	0.122963	-2.07611	-1.73476	-2.41745	4.21667	3.32824	5.34226	3.97174	0.561105
			2	21.7372	21.4931		-7.86104	-8.10519	0.122963	-1.73544	-1.39409	-2.07678	3.3298	2.62823	4.21865
			3	21.3455	21.4931		-8.25282	-8.10519	0.122963	-2.12721	-1.78587	-2.46856	4.36873	3.44826	5.5349
	Actin		1	29.2947	29.5983	0.273393
			2	29.8251	29.5983
			3	29.675	29.5983
GRMZM2G348551	sugary2	5 DAP	1	29.9423	30.0292	0.0858482	0.134147	0.221128	0.0495645	0.104462	0.242053	-0.0331285	0.930151	0.845541	1.02323	0.876764	0.0522117
			2	30.0315	30.0292		0.22344	0.221128	0.0495645	0.193756	0.331347	0.0561648	0.874327	0.794794	0.961818
			3	30.1139	30.0292		0.305797	0.221128	0.0495645	0.276112	0.413703	0.138521	0.825813	0.750694	0.90845
	Actin		1	29.7007	29.8081	0.163225
			2	29.7277	29.8081
			3	29.9959	29.8081
	sugary2	10 DAP	1	30.6797	30.2039	0.819304	0.468967	-0.00685249	0.473025	0.439283	1.7524	-0.873835	0.737501	0.296808	1.83253	1.15129	0.714221
			2	30.6741	30.2039		0.463373	-0.00685249	0.473025	0.433688	1.74681	-0.879429	0.740367	0.297961	1.83965
			3	29.2578	30.2039		-0.952897	-0.00685249	0.473025	-0.982582	0.330536	-2.2957	1.976	0.795241	4.90992
	Actin		1	30.5078	30.2107	0.26335
			2	30.006	30.2107
			3	30.1183	30.2107
	sugary2	15 DAP	1	30.5051	30.1445	0.511096	0.390254	0.0296844	0.295081	0.36057	1.17972	-0.458576	0.778857	0.441438	1.37419	1.04493	0.395929
			2	30.3688	30.1445		0.254012	0.0296844	0.295081	0.224328	1.04347	-0.594818	0.855994	0.485158	1.51028
			3	29.5596	30.1445		-0.555213	0.0296844	0.295081	-0.584897	0.234249	-1.40404	1.49993	0.850128	2.64642
	Actin		1	29.7799	30.1148	0.290994
			2	30.306	30.1148
			3	30.2586	30.1148
	sugary2	20 DAP	1	28.3167	28.4328	0.219716	-0.753323	-0.637197	0.126853	-0.783007	-0.430863	-1.13515	1.72071	1.34804	2.19642	1.59958	0.232178
			2	28.2955	28.4328		-0.774483	-0.637197	0.126853	-0.804168	-0.452023	-1.15631	1.74614	1.36796	2.22887
			3	28.6862	28.4328		-0.383785	-0.637197	0.126853	-0.41347	-0.0613255	-0.765614	1.33189	1.04342	1.70009
	Actin		1	29.2201	29.07	0.441929
			2	28.5726	29.07
			3	29.4173	29.07
GRMZM2G024993	wx1	5 DAP	1	21.263	21.3002	0.0840236	-5.47347	-5.43623	0.048511	-1.34833	-1.21366	-1.48299	2.54616	2.31925	2.79528	2.48406	0.142347
			2	21.2413	21.3002		-5.4952	-5.43623	0.048511	-1.37005	-1.23539	-1.50472	2.5848	2.35444	2.83769
			3	21.3964	21.3002		-5.34002	-5.43623	0.048511	-1.21488	-1.08021	-1.34954	2.32121	2.11434	2.54832
	Actin		1	26.7232	26.7365	0.0638085
			2	26.6803	26.7365
			3	26.8059	26.7365
	wx1	10 DAP	1	20.4628	20.494	0.27564	-6.76751	-6.73629	0.159141	-2.64236	-2.20059	-3.08414	6.24353	4.59667	8.48043	6.18366	1.15732
			2	20.2353	20.494		-6.99499	-6.73629	0.159141	-2.86985	-2.42807	-3.31162	7.30988	5.38174	9.92882
			3	20.7839	20.494		-6.44637	-6.73629	0.159141	-2.32123	-1.87945	-2.763	4.99757	3.67935	6.78807
	Actin		1	27.4094	27.2303	0.165846
			2	27.0821	27.2303
			3	27.1994	27.2303
	wx1	15 DAP	1	22.8967	22.6576	0.315287	-3.886	-4.12515	0.182031	0.239151	0.74447	-0.266167	0.847244	0.596887	1.20261	1.01655	0.232023
			2	22.7757	22.6576		-4.007	-4.12515	0.182031	0.118145	0.623464	-0.387173	0.921371	0.649111	1.30783
			3	22.3003	22.6576		-4.48244	-4.12515	0.182031	-0.357296	0.148022	-0.862615	1.28102	0.902487	1.81833
	Actin		1	26.8199	26.7827	0.103169
			2	26.6661	26.7827
			3	26.8621	26.7827
	wx1	20 DAP	1	19.3768	19.8066	0.372776	-7.85491	-7.42512	0.215223	-3.72977	-3.13231	-4.32722	13.267	8.76836	20.0735	10.0802	2.76245
			2	20.0009	19.8066		-7.23083	-7.42512	0.215223	-3.10568	-2.50822	-3.70314	8.608	5.68918	13.0243
			3	20.0421	19.8066		-7.18964	-7.42512	0.215223	-3.06449	-2.46703	-3.66195	8.36572	5.52905	12.6577
	Actin		1	27.2302	27.2317	0.0359888
			2	27.2684	27.2317
			3	27.1965	27.2317
GRMZM2G129674	ERF	5 DAP	1	26.328	26.2135	0.12825	-1.17841	-1.29295	0.0740449	-1.416	-1.21045	-1.62155	2.66845	2.31411	3.07706	2.89661	0.260317
			2	26.0749	26.2135		-1.43151	-1.29295	0.0740449	-1.6691	-1.46355	-1.87465	3.18017	2.75787	3.66713
			3	26.2375	26.2135		-1.26892	-1.29295	0.0740449	-1.50651	-1.30096	-1.71206	2.84122	2.46393	3.27628
	Actin		1	27.2467	27.5064	0.225215
			2	27.647	27.5064
			3	27.6256	27.5064
	ERF	10 DAP	1	26.7985	26.7629	0.0564484	-1.16919	-1.20484	0.0325905	-1.40678	-1.31631	-1.49725	2.65145	2.49029	2.82305	2.71917	0.107551
			2	26.6978	26.7629		-1.26992	-1.20484	0.0325905	-1.50751	-1.41704	-1.59798	2.84318	2.67036	3.02719
			3	26.7923	26.7629		-1.1754	-1.20484	0.0325905	-1.41298	-1.32251	-1.50346	2.66287	2.50101	2.83521
	Actin		1	27.9646	27.9677	0.0144597
			2	27.9835	27.9677
			3	27.9551	27.9677
	ERF	15 DAP	1	27.6007	27.6922	0.147016	0.146081	0.237589	0.0848796	-0.0915073	0.144118	-0.327133	1.06548	0.904932	1.25452	1.0034	0.099107
			2	27.6142	27.6922		0.159514	0.237589	0.0848796	-0.0780746	0.157551	-0.3137	1.05561	0.896546	1.24289
			3	27.8618	27.6922		0.407171	0.237589	0.0848796	0.169582	0.405208	-0.0660438	0.8891	0.755128	1.04684
	Actin		1	27.3629	27.4547	0.315058
			2	27.1957	27.4547
			3	27.8054	27.4547
	ERF	20 DAP	1	25.7823	25.7955	0.0461826	-1.3702	-1.35702	0.0266636	-1.60779	-1.53377	-1.68181	3.04784	2.89541	3.20829	3.02115	0.0960886
			2	25.8468	25.7955		-1.30568	-1.35702	0.0266636	-1.54327	-1.46925	-1.61729	2.91454	2.76878	3.06798
			3	25.7573	25.7955		-1.39518	-1.35702	0.0266636	-1.63277	-1.55875	-1.70679	3.10108	2.94599	3.26433
	Actin		1	27.0383	27.1525	0.117581
			2	27.146	27.1525
			3	27.2731	27.1525
GRMZM2G099522	MADS	5 DAP	1	22.979	22.4047	0.51097	-6.55049	-7.12478	0.295008	1.09312	1.91207	0.27418	0.468745	0.265712	0.82692	0.725877	0.233208
			2	22.0003	22.4047		-7.52914	-7.12478	0.295008	0.114481	0.933425	-0.704463	0.923715	0.523614	1.62954
			3	22.2348	22.4047		-7.2947	-7.12478	0.295008	0.348921	1.16786	-0.470022	0.785171	0.44508	1.38513
	Actin		1	29.7007	29.5295	0.320237
			2	29.7277	29.5295
			3	29.16	29.5295
	MADS	10 DAP	1	23.134	23.2036	0.146711	-7.07678	-7.00715	0.0847036	0.566842	0.801979	0.331705	0.675093	0.573562	0.794597	0.645465	0.0636956
			2	23.1046	23.2036		-7.10609	-7.00715	0.0847036	0.537527	0.772664	0.30239	0.688951	0.585336	0.810908
			3	23.3721	23.2036		-6.83859	-7.00715	0.0847036	0.805024	1.04016	0.569887	0.572353	0.486273	0.67367
	Actin		1	30.5078	30.2107	0.26335
			2	30.006	30.2107
			3	30.1183	30.2107
	MADS	15 DAP	1	22.328	22.4712	0.362805	-7.78682	-7.64362	0.209466	-0.143199	0.438278	-0.724676	1.10435	0.738015	1.65253	1.0203	0.238371
			2	22.8838	22.4712		-7.23107	-7.64362	0.209466	0.412552	0.994029	-0.168926	0.751293	0.502074	1.12422
			3	22.2019	22.4712		-7.91297	-7.64362	0.209466	-0.269353	0.312124	-0.85083	1.20527	0.805455	1.80354
	Actin		1	29.7799	30.1148	0.290994
			2	30.306	30.1148
			3	30.2586	30.1148
	MADS	20 DAP	1	23.7463	24.4398	0.600575	-5.32372	-4.63024	0.346742	2.31989	3.28245	1.35734	0.200282	0.102774	0.390302	0.131686	0.0594063
			2	24.787	24.4398		-4.28304	-4.63024	0.346742	3.36058	4.32314	2.39802	0.0973565	0.0499582	0.189724
			3	24.786	24.4398		-4.28396	-4.63024	0.346742	3.35966	4.32222	2.3971	0.0974184	0.04999	0.189845
	Actin		1	29.2201	29.07	0.441929
			2	28.5726	29.07
			3	29.4173	29.07
GRMZM2G158043	zpu1	5 DAP	1	27.8992	27.6639	0.204425	0.120794	-0.114502	0.118025	-0.32771	-7.39705e-05	-0.655347	1.25502	1.00005	1.57499	1.48699	0.201705
			2	27.53	27.6639		-0.248466	-0.114502	0.118025	-0.696971	-0.369335	-1.02461	1.6211	1.29176	2.03441
			3	27.5626	27.6639		-0.215834	-0.114502	0.118025	-0.664339	-0.336702	-0.991975	1.58484	1.26287	1.98891
	Actin		1	27.8633	27.7784	0.137173
			2	27.6202	27.7784
			3	27.8518	27.7784
	zpu1	10 DAP	1	27.0173	27.017	0.168468	-0.885794	-0.886013	0.0972651	-1.3343	-1.06429	-1.60431	2.52153	2.09114	3.0405	2.53339	0.295362
			2	27.1854	27.017		-0.717655	-0.886013	0.0972651	-1.16616	-0.896152	-1.43617	2.24414	1.86109	2.70601
			3	26.8485	27.017		-1.05459	-0.886013	0.0972651	-1.5031	-1.23309	-1.7731	2.8345	2.3507	3.41788
	Actin		1	27.9368	27.9031	0.148253
			2	28.0315	27.9031
			3	27.7408	27.9031
	zpu1	15 DAP	1	28.4179	27.801	0.538163	1.06543	0.448505	0.310709	0.616929	1.47946	-0.245598	0.652057	0.358624	1.18558	1.04377	0.343735
			2	27.428	27.801		0.0754787	0.448505	0.310709	-0.373026	0.489501	-1.23555	1.29507	0.712271	2.35472
			3	27.5571	27.801		0.204601	0.448505	0.310709	-0.243903	0.618624	-1.10643	1.18419	0.651292	2.15312
	Actin		1	27.203	27.3525	0.271805
			2	27.6662	27.3525
			3	27.1883	27.3525
	zpu1	20 DAP	1	27.3999	27.3829	0.0677951	-3.05574	-3.07272	0.0391415	-3.50424	-3.39558	-3.6129	11.347	10.5238	12.2346	11.4899	0.544227
			2	27.3083	27.3829		-3.14739	-3.07272	0.0391415	-3.59589	-3.48724	-3.70455	12.0913	11.2141	13.0371
			3	27.4406	27.3829		-3.01503	-3.07272	0.0391415	-3.46353	-3.35488	-3.57219	11.0313	10.231	11.8942
	Actin		1	30.2293	30.4557	0.196066
			2	30.5727	30.4557
			3	30.565	30.4557
GRMZM2G138727	27-kD γ-zein	5 DAP	1	12.6315	12.5801	0.0490375	-13.599	-13.6504	0.0283118	-1.75198	-1.67339	-1.83058	3.36821	3.18963	3.55679	3.49174	0.118353
			2	12.5338	12.5801		-13.6966	-13.6504	0.0283118	-1.84965	-1.77106	-1.92825	3.60413	3.41304	3.80592
			3	12.5749	12.5801		-13.6555	-13.6504	0.0283118	-1.80854	-1.72995	-1.88713	3.50288	3.31716	3.699
	Actin		1	26.2494	26.2305	0.0368505
			2	26.188	26.2305
			3	26.254	26.2305
	27-kD γ-zein	10 DAP	1	11.9068	11.8589	0.0792837	-14.4476	-14.4954	0.0457745	-2.6006	-2.47353	-2.72767	6.06537	5.55399	6.62383	6.27625	0.350188
			2	11.7674	11.8589		-14.5869	-14.4954	0.0457745	-2.73995	-2.61288	-2.86702	6.68049	6.11725	7.29558
			3	11.9026	11.8589		-14.4517	-14.4954	0.0457745	-2.60476	-2.47769	-2.73183	6.0829	5.57005	6.64297
	Actin		1	26.3813	26.3544	0.0411746
			2	26.3748	26.3544
			3	26.307	26.3544
	27-kD γ-zein	15 DAP	1	13.7698	13.679	0.243218	-11.7562	-11.847	0.140422	0.0907731	0.480585	-0.299039	0.939019	0.716687	1.23032	1.00975	0.176319
			2	13.8638	13.679		-11.6622	-11.847	0.140422	0.184777	0.574589	-0.205035	0.879785	0.671478	1.15271
			3	13.4035	13.679		-12.1225	-11.847	0.140422	-0.27555	0.114262	-0.665362	1.21046	0.923855	1.58597
	Actin		1	25.6124	25.526	0.0846581
			2	25.5224	25.526
			3	25.4432	25.526
	27-kD γ-zein	20 DAP	1	11.2611	11.4074	0.141673	-14.3833	-14.237	0.0817952	-2.53634	-2.30928	-2.76341	5.80117	4.95636	6.78998	5.25871	0.518366
			2	11.4171	11.4074		-14.2273	-14.237	0.0817952	-2.38034	-2.15327	-2.6074	5.20658	4.44836	6.09405
			3	11.5439	11.4074		-14.1005	-14.237	0.0817952	-2.2535	-2.02643	-2.48056	4.76838	4.07397	5.58115
	Actin		1	25.6436	25.6444	0.00317228
			2	25.6479	25.6444
			3	25.6417	25.6444
