# Supplementary material for: Comparative transcriptomics reveals the difference in early endosperm development between maize with different amylose contents
Source: PeerJ. 2019 Aug 28;7:e7528. doi: 10.7717/peerj.7528 (PMC6717500; doi:10.7717/peerj.7528)
Supplement: Table S8 [file peerj-07-7528-s015.xlsx]

## Sheet: blue
GO_acc	term_type	Term	queryitem	querytotal	bgitem	bgtotal	pvalue	FDR	entries
GO:0032502	P	developmental process	54	751	111	39203	1.8e-51	3.1e-48	// GRMZM2G046885 // GRMZM5G891282 // GRMZM2G104074 // GRMZM2G003514 // AC215201.3_FG005 // GRMZM2G464013 // GRMZM2G008751 // GRMZM2G375504 // GRMZM5G842058 // GRMZM2G702026 // GRMZM2G005633 // GRMZM2G333861 // GRMZM2G162295 // GRMZM2G012631 // GRMZM2G066326 // GRMZM2G152891 // GRMZM2G033356 // GRMZM2G039934 // GRMZM2G316232 // GRMZM2G119150 // GRMZM2G150014 // GRMZM2G094081 // GRMZM2G115047 // GR…
GO:0007275	P	multicellular organismal development	52	751	107	39203	1.4e-49	1.2e-46	// GRMZM2G046885 // GRMZM5G891282 // GRMZM2G104074 // GRMZM2G003514 // AC215201.3_FG005 // GRMZM2G464013 // GRMZM2G008751 // GRMZM2G375504 // GRMZM5G842058 // GRMZM2G702026 // GRMZM2G005633 // GRMZM2G333861 // GRMZM2G162295 // GRMZM2G012631 // GRMZM2G152891 // GRMZM2G033356 // GRMZM2G039934 // GRMZM2G316232 // GRMZM2G119150 // GRMZM2G150014 // GRMZM2G094081 // GRMZM2G115047 // GRMZM2G072658 // GR…
GO:0048856	P	anatomical structure development	41	751	42	39203	2.3e-48	1.3e-45	// GRMZM2G046885 // GRMZM2G104074 // GRMZM2G003514 // GRMZM2G702026 // GRMZM2G464013 // GRMZM2G008751 // GRMZM2G375504 // GRMZM5G842058 // GRMZM2G005633 // GRMZM2G333861 // GRMZM2G162295 // GRMZM2G033356 // GRMZM2G039934 // GRMZM2G316232 // GRMZM2G119150 // GRMZM2G150014 // GRMZM2G094081 // GRMZM2G065635 // GRMZM2G072658 // GRMZM2G083526 // GRMZM2G056600 // GRMZM2G024668 // GRMZM2G052544 // GRMZM…
GO:0042221	P	response to chemical stimulus	86	751	626	39203	2.9e-43	1.3e-40	// GRMZM2G024668 // GRMZM2G040638 // GRMZM2G063850 // GRMZM2G086496 // GRMZM2G139900 // GRMZM2G119150 // GRMZM2G113408 // GRMZM2G131525 // GRMZM2G121309 // GRMZM2G120652 // GRMZM2G087955 // GRMZM2G112165 // GRMZM2G038170 // GRMZM2G392975 // GRMZM2G056014 // GRMZM2G021378 // GRMZM2G171073 // GRMZM5G833389 // GRMZM2G150337 // GRMZM2G091155 // GRMZM2G036908 // GRMZM2G174458 // GRMZM5G865943 // GRMZM…
GO:0010033	P	response to organic substance	40	751	72	39203	3.6e-40	1.3e-37	// GRMZM2G046885 // GRMZM2G025387 // GRMZM2G065635 // GRMZM2G702026 // GRMZM2G375504 // GRMZM2G035465 // GRMZM2G033359 // GRMZM5G865943 // GRMZM2G119150 // GRMZM2G166297 // GRMZM2G072658 // GRMZM2G318180 // GRMZM2G056600 // GRMZM2G121309 // AC197146.3_FG002 // GRMZM2G171383 // GRMZM2G143460 // GRMZM2G158835 // GRMZM2G057408 // GRMZM2G087955 // GRMZM2G345717 // GRMZM2G379898 // GRMZM2G039588 // GR…
GO:0009607	P	response to biotic stimulus	29	751	31	39203	3.4e-34	9.9e-32	// GRMZM2G017365 // GRMZM2G040309 // GRMZM2G415793 // GRMZM2G333861 // GRMZM2G029219 // GRMZM2G368151 // GRMZM2G119370 // GRMZM2G011592 // GRMZM2G141642 // GRMZM2G156174 // GRMZM2G119150 // GRMZM2G368890 // AC213600.3_FG002 // AC197146.3_FG002 // GRMZM2G171383 // GRMZM2G091228 // GRMZM2G357620 // GRMZM2G174458 // GRMZM2G383088 // GRMZM2G117707 // GRMZM2G092474 // GRMZM2G379898 // GRMZM2G168416 //…
GO:0010035	P	response to inorganic substance	29	751	33	39203	1.2e-33	2.9e-31	// GRMZM2G110509 // GRMZM2G091155 // GRMZM2G040638 // GRMZM2G040309 // GRMZM2G063850 // GRMZM2G086496 // GRMZM2G462140 // GRMZM2G333861 // GRMZM2G029219 // GRMZM2G011592 // GRMZM2G139900 // GRMZM2G113408 // GRMZM2G057408 // GRMZM2G024668 // GRMZM2G003385 // GRMZM2G091228 // GRMZM2G087955 // GRMZM2G112165 // GRMZM2G038170 // GRMZM2G012631 // GRMZM2G133919 // GRMZM2G000236 // GRMZM2G437100 // GRMZM…
GO:0009719	P	response to endogenous stimulus	33	751	72	39203	3.1e-31	6.8e-29	// GRMZM2G046885 // GRMZM2G025387 // GRMZM2G065635 // GRMZM2G702026 // GRMZM2G375504 // GRMZM2G379898 // GRMZM2G035465 // GRMZM5G865943 // GRMZM2G033359 // GRMZM2G057408 // GRMZM2G056600 // GRMZM2G121309 // AC197146.3_FG002 // GRMZM2G021378 // GRMZM2G143460 // GRMZM2G158835 // GRMZM2G166297 // GRMZM2G345717 // GRMZM2G087955 // GRMZM2G072658 // GRMZM2G039588 // GRMZM2G095892 // GRMZM2G117746 // GR…
GO:0010038	P	response to metal ion	26	751	27	39203	5.3e-31	1e-28	// GRMZM2G110509 // GRMZM2G091155 // GRMZM2G040309 // GRMZM2G063850 // GRMZM2G462140 // GRMZM2G333861 // GRMZM2G029219 // GRMZM2G011592 // GRMZM2G139900 // GRMZM2G113408 // GRMZM2G057408 // GRMZM2G024668 // GRMZM2G003385 // GRMZM2G091228 // GRMZM2G087955 // GRMZM2G112165 // GRMZM2G038170 // GRMZM2G012631 // GRMZM2G133919 // GRMZM2G000236 // GRMZM2G056014 // GRMZM2G009282 // GRMZM2G154218 // GRMZM…
GO:0022414	P	reproductive process	33	751	85	39203	2.4e-29	4.1e-27	// GRMZM2G046885 // GRMZM2G003514 // GRMZM2G024668 // GRMZM2G464013 // GRMZM2G375504 // GRMZM2G455243 // GRMZM2G005633 // GRMZM2G333861 // GRMZM2G152891 // GRMZM2G065203 // GRMZM2G039934 // GRMZM2G316232 // GRMZM2G093595 // GRMZM2G094081 // GRMZM2G115047 // GRMZM2G072658 // GRMZM2G083526 // GRMZM2G056600 // GRMZM2G132032 // GRMZM2G346113 // GRMZM2G097059 // GRMZM2G025409 // GRMZM2G117250 // GRMZM…
GO:0009725	P	response to hormone stimulus	30	751	72	39203	1.6e-27	2.5e-25	// GRMZM2G046885 // GRMZM2G025387 // GRMZM2G065635 // GRMZM2G702026 // GRMZM2G375504 // GRMZM2G379898 // GRMZM2G035465 // GRMZM5G865943 // GRMZM2G033359 // GRMZM2G057408 // GRMZM2G056600 // GRMZM2G121309 // AC197146.3_FG002 // GRMZM2G021378 // GRMZM2G143460 // GRMZM2G158835 // GRMZM2G166297 // GRMZM2G087955 // GRMZM2G072658 // GRMZM2G039588 // GRMZM2G095892 // GRMZM2G117746 // GRMZM5G862101 // GR…
GO:0048731	P	system development	25	751	40	39203	1.5e-26	2.2e-24	// GRMZM2G046885 // GRMZM2G104074 // GRMZM2G003514 // GRMZM2G024668 // GRMZM2G008751 // GRMZM2G375504 // GRMZM5G842058 // GRMZM2G702026 // GRMZM2G162295 // GRMZM2G039934 // GRMZM2G093595 // GRMZM2G150014 // GRMZM2G119150 // GRMZM2G065635 // GRMZM2G072658 // GRMZM2G056600 // GRMZM2G052544 // GRMZM2G097059 // GRMZM2G087955 // GRMZM2G012631 // GRMZM2G117746 // GRMZM2G149481 // GRMZM2G108739 // GRMZM…
GO:0000003	P	reproduction	34	751	181	39203	1.8e-21	2.4e-19	// GRMZM2G046885 // GRMZM2G003514 // GRMZM2G024668 // GRMZM2G464013 // GRMZM2G375504 // GRMZM2G455243 // GRMZM2G005633 // GRMZM2G333861 // GRMZM2G152891 // GRMZM2G065203 // GRMZM2G039934 // GRMZM2G316232 // GRMZM2G093595 // GRMZM2G094081 // GRMZM2G115047 // GRMZM2G072658 // GRMZM2G083526 // GRMZM2G056600 // GRMZM2G132032 // GRMZM2G346113 // GRMZM2G097059 // GRMZM2G025409 // GRMZM2G117250 // GRMZM…
GO:0051704	P	multi-organism process	33	751	186	39203	3.2e-20	4e-18	// GRMZM2G017365 // GRMZM2G040309 // GRMZM2G415793 // GRMZM2G333861 // GRMZM2G029219 // GRMZM2G368151 // GRMZM2G174458 // GRMZM2G011592 // GRMZM2G141642 // GRMZM2G156174 // GRMZM2G119150 // GRMZM2G368890 // AC213600.3_FG002 // AC197146.3_FG002 // GRMZM2G132032 // GRMZM2G171383 // GRMZM2G091228 // GRMZM2G357620 // GRMZM2G383088 // GRMZM2G152891 // GRMZM2G117707 // GRMZM2G117250 // GRMZM2G092474 //…
GO:0009414	P	response to water deprivation	18	751	26	39203	4.6e-20	5.3e-18	// GRMZM2G392975 // GRMZM5G862101 // GRMZM2G415793 // GRMZM2G332838 // GRMZM2G024668 // GRMZM2G492252 // GRMZM2G093595 // GRMZM2G087955 // GRMZM2G001160 // GRMZM2G174807 // GRMZM2G056600 // GRMZM2G086496 // AC197146.3_FG002 // GRMZM2G012631 // GRMZM2G375504 // GRMZM2G072855 // GRMZM2G063896 // AC233865.1_FG001
GO:0009415	P	response to water	18	751	38	39203	7.6e-18	8.3e-16	// GRMZM2G392975 // GRMZM5G862101 // GRMZM2G415793 // GRMZM2G332838 // GRMZM2G024668 // GRMZM2G492252 // GRMZM2G093595 // GRMZM2G087955 // GRMZM2G001160 // GRMZM2G174807 // GRMZM2G056600 // GRMZM2G086496 // AC197146.3_FG002 // GRMZM2G012631 // GRMZM2G375504 // GRMZM2G072855 // GRMZM2G063896 // AC233865.1_FG001
GO:0009314	P	response to radiation	20	751	61	39203	3.8e-17	3.9e-15	// GRMZM2G152891 // GRMZM2G073003 // GRMZM2G120652 // GRMZM2G113033 // GRMZM2G150337 // GRMZM2G080044 // GRMZM2G003565 // GRMZM2G152888 // GRMZM2G437100 // GRMZM2G062396 // GRMZM2G155216 // GRMZM2G056600 // GRMZM2G063850 // GRMZM2G141810 // AC197146.3_FG002 // GRMZM2G104626 // GRMZM2G094081 // GRMZM2G331720 // GRMZM2G175562 // GRMZM2G032628
GO:0050896	P	response to stimulus	137	751	3421	39203	4.5e-16	4.3e-14	// GRMZM2G099984 // GRMZM2G024668 // GRMZM2G040638 // GRMZM2G063850 // GRMZM2G005633 // GRMZM2G094081 // GRMZM2G139900 // GRMZM2G119150 // GRMZM2G039588 // GRMZM2G141642 // GRMZM2G113408 // GRMZM2G155216 // GRMZM2G121309 // GRMZM2G120652 // GRMZM2G318180 // GRMZM2G117707 // GRMZM2G310410 // GRMZM2G087955 // GRMZM2G112165 // GRMZM2G168416 // GRMZM2G038170 // GRMZM2G392975 // GRMZM2G056014 // GRMZM…
GO:0009416	P	response to light stimulus	19	751	61	39203	5.1e-16	4.7e-14	// GRMZM2G152891 // GRMZM2G120652 // GRMZM2G113033 // GRMZM2G150337 // GRMZM2G080044 // GRMZM2G003565 // GRMZM2G152888 // GRMZM2G437100 // GRMZM2G062396 // GRMZM2G155216 // GRMZM2G056600 // GRMZM2G063850 // GRMZM2G141810 // AC197146.3_FG002 // GRMZM2G104626 // GRMZM2G094081 // GRMZM2G331720 // GRMZM2G175562 // GRMZM2G032628
GO:0046700	P	heterocycle catabolic process	14	751	27	39203	1.3e-14	1.2e-12	// GRMZM2G308860 // GRMZM5G843537 // GRMZM2G432480 // GRMZM2G157157 // GRMZM2G091837 // GRMZM2G316232 // GRMZM2G110509 // GRMZM2G165757 // GRMZM2G119345 // GRMZM2G065480 // GRMZM2G113408 // GRMZM2G154218 // GRMZM2G007038 // GRMZM2G035520
GO:0051716	P	cellular response to stimulus	32	751	324	39203	4e-13	3.3e-11	// GRMZM2G025387 // GRMZM2G421541 // GRMZM2G065635 // GRMZM2G096585 // GRMZM2G040638 // GRMZM2G702026 // GRMZM2G035465 // GRMZM2G331720 // GRMZM5G865943 // GRMZM2G119150 // GRMZM2G056600 // GRMZM2G024668 // GRMZM2G042347 // GRMZM2G091228 // GRMZM2G080044 // GRMZM2G112165 // AC197146.3_FG002 // GRMZM2G012631 // GRMZM2G318180 // GRMZM2G166297 // GRMZM2G010046 // GRMZM2G121309 // GRMZM2G171073 // GR…
GO:0048518	P	positive regulation of biological process	13	751	33	39203	1.9e-12	1.5e-10	// GRMZM2G046885 // GRMZM2G101058 // GRMZM2G166297 // GRMZM2G033356 // GRMZM5G865943 // GRMZM2G104074 // GRMZM2G003514 // GRMZM2G492252 // GRMZM2G093595 // GRMZM2G094081 // GRMZM2G056600 // GRMZM2G333861 // GRMZM2G145085
GO:0009617	P	response to bacterium	9	751	16	39203	4.4e-10	3.1e-08	// GRMZM2G117707 // GRMZM2G119150 // GRMZM2G091228 // GRMZM2G117971 // AC197146.3_FG002 // GRMZM2G171383 // GRMZM2G175562 // GRMZM2G357620 // AC213600.3_FG002
GO:0048522	P	positive regulation of cellular process	11	751	33	39203	4.2e-10	3.1e-08	// GRMZM2G046885 // GRMZM2G101058 // GRMZM2G166297 // GRMZM2G033356 // GRMZM5G865943 // GRMZM2G104074 // GRMZM2G492252 // GRMZM2G093595 // GRMZM2G094081 // GRMZM2G056600 // GRMZM2G145085
GO:0009620	P	response to fungus	8	751	12	39203	1.5e-09	1.1e-07	// GRMZM2G168416 // GRMZM2G059565 // GRMZM2G368890 // GRMZM2G117971 // GRMZM2G415793 // GRMZM2G379898 // GRMZM2G333861 // GRMZM2G092474
GO:0040007	P	growth	7	751	7	39203	2.5e-09	1.6e-07	// GRMZM2G056600 // GRMZM2G065635 // GRMZM2G093595 // GRMZM2G073003 // GRMZM2G132032 // GRMZM2G117746 // GRMZM2G529859
GO:0044255	P	cellular lipid metabolic process	30	751	474	39203	4.1e-08	2.6e-06	// GRMZM2G124671 // GRMZM2G163683 // GRMZM2G109967 // GRMZM2G078373 // GRMZM5G829544 // GRMZM2G493395 // GRMZM2G135498 // GRMZM2G364597 // GRMZM2G039385 // GRMZM2G101000 // GRMZM5G865943 // GRMZM2G093595 // GRMZM2G083526 // GRMZM2G094900 // AC197146.3_FG002 // GRMZM2G031568 // GRMZM5G830329 // GRMZM2G076392 // GRMZM2G143646 // GRMZM2G003526 // GRMZM2G058404 // GRMZM2G117746 // GRMZM2G000236 // GR…
GO:0009408	P	response to heat	6	751	7	39203	6.6e-08	4.1e-06	// GRMZM2G024668 // GRMZM2G096585 // GRMZM2G437100 // GRMZM2G112165 // GRMZM2G063850 // GRMZM2G012631
GO:0030258	P	lipid modification	7	751	14	39203	7.5e-08	4.5e-06	// GRMZM2G076392 // GRMZM2G057086 // GRMZM2G174675 // GRMZM2G124671 // GRMZM5G828302 // GRMZM2G094900 // GRMZM2G101000
GO:0044281	P	small molecule metabolic process	91	751	2730	39203	3.6e-07	2.1e-05	// GRMZM2G413647 // AC234185.1_FG004 // GRMZM2G135970 // GRMZM2G364597 // GRMZM2G316232 // GRMZM2G119150 // GRMZM5G843537 // GRMZM2G120652 // GRMZM2G031568 // GRMZM5G830329 // GRMZM2G117707 // GRMZM5G892522 // GRMZM2G174675 // GRMZM5G833389 // GRMZM2G152888 // GRMZM2G149865 // GRMZM5G828302 // GRMZM2G102382 // GRMZM2G131575 // GRMZM5G829544 // GRMZM2G323719 // GRMZM2G405503 // GRMZM2G061401 // GR…
GO:0045941	P	positive regulation of transcription	7	751	19	39203	3.9e-07	2.1e-05	// GRMZM2G046885 // GRMZM2G101058 // GRMZM2G033356 // GRMZM2G093595 // GRMZM2G094081 // GRMZM2G056600 // GRMZM2G145085
GO:0010628	P	positive regulation of gene expression	7	751	19	39203	3.9e-07	2.1e-05	// GRMZM2G046885 // GRMZM2G101058 // GRMZM2G033356 // GRMZM2G093595 // GRMZM2G094081 // GRMZM2G056600 // GRMZM2G145085
GO:0048523	P	negative regulation of cellular process	9	751	42	39203	4.2e-07	2.2e-05	// GRMZM2G046885 // GRMZM2G097059 // GRMZM2G166297 // GRMZM2G047143 // GRMZM2G035890 // GRMZM2G056600 // GRMZM2G141810 // GRMZM2G175562 // GRMZM2G357620
GO:0008361	P	regulation of cell size	5	751	5	39203	5.4e-07	2.7e-05	// GRMZM2G065635 // GRMZM2G073003 // GRMZM2G132032 // GRMZM2G117746 // GRMZM2G056600
GO:0016049	P	cell growth	5	751	5	39203	5.4e-07	2.7e-05	// GRMZM2G065635 // GRMZM2G073003 // GRMZM2G132032 // GRMZM2G117746 // GRMZM2G056600
GO:0050832	P	defense response to fungus	6	751	12	39203	6.6e-07	3.1e-05	// GRMZM2G168416 // GRMZM2G368890 // GRMZM2G092474 // GRMZM2G379898 // GRMZM2G333861 // GRMZM2G117971
GO:0042742	P	defense response to bacterium	6	751	12	39203	6.6e-07	3.1e-05	// GRMZM2G119150 // GRMZM2G175562 // AC213600.3_FG002 // GRMZM2G091228 // GRMZM2G357620 // GRMZM2G117971
GO:0044283	P	small molecule biosynthetic process	35	751	708	39203	8.8e-07	4e-05	// GRMZM2G163683 // GRMZM2G078373 // GRMZM5G829544 // GRMZM2G375504 // GRMZM2G323719 // GRMZM2G104546 // GRMZM2G152888 // GRMZM2G031825 // GRMZM2G364597 // GRMZM2G341723 // GRMZM2G083526 // GRMZM2G099729 // GRMZM2G119150 // GRMZM2G150014 // GRMZM2G061135 // GRMZM2G313272 // GRMZM2G120652 // GRMZM2G143357 // GRMZM2G478568 // GRMZM2G046583 // GRMZM2G117707 // GRMZM2G345717 // GRMZM5G891282 // GRMZM…
GO:0009639	P	response to red or far red light	5	751	6	39203	9.7e-07	4.3e-05	// GRMZM2G141810 // GRMZM2G152891 // GRMZM2G155216 // GRMZM2G113033 // GRMZM2G152888
GO:0032787	P	monocarboxylic acid metabolic process	19	751	252	39203	1.1e-06	4.7e-05	// GRMZM2G057086 // GRMZM2G163683 // GRMZM2G078373 // GRMZM5G830329 // GRMZM5G829544 // GRMZM2G135498 // GRMZM2G003526 // GRMZM2G364597 // GRMZM5G828302 // GRMZM2G350020 // GRMZM2G106376 // GRMZM2G141810 // AC197146.3_FG002 // GRMZM2G104626 // GRMZM2G083526 // GRMZM2G085941 // GRMZM2G117746 // GRMZM2G000236 // GRMZM2G478568
GO:0045935	P	positive regulation of nucleobase, nucleoside, nucleotide and nucleic acid metabolic process	7	751	23	39203	1.1e-06	4.7e-05	// GRMZM2G046885 // GRMZM2G101058 // GRMZM2G033356 // GRMZM2G093595 // GRMZM2G094081 // GRMZM2G056600 // GRMZM2G145085
GO:0051173	P	positive regulation of nitrogen compound metabolic process	7	751	23	39203	1.1e-06	4.7e-05	// GRMZM2G046885 // GRMZM2G101058 // GRMZM2G033356 // GRMZM2G093595 // GRMZM2G094081 // GRMZM2G056600 // GRMZM2G145085
GO:0048519	P	negative regulation of biological process	9	751	49	39203	1.3e-06	5.3e-05	// GRMZM2G046885 // GRMZM2G097059 // GRMZM2G166297 // GRMZM2G047143 // GRMZM2G035890 // GRMZM2G056600 // GRMZM2G141810 // GRMZM2G175562 // GRMZM2G357620
GO:0009891	P	positive regulation of biosynthetic process	7	751	26	39203	2.3e-06	8.4e-05	// GRMZM2G046885 // GRMZM2G101058 // GRMZM2G033356 // GRMZM2G093595 // GRMZM2G094081 // GRMZM2G056600 // GRMZM2G145085
GO:0010557	P	positive regulation of macromolecule biosynthetic process	7	751	26	39203	2.3e-06	8.4e-05	// GRMZM2G046885 // GRMZM2G101058 // GRMZM2G033356 // GRMZM2G093595 // GRMZM2G094081 // GRMZM2G056600 // GRMZM2G145085
GO:0044248	P	cellular catabolic process	37	751	806	39203	2.3e-06	8.4e-05	// GRMZM2G157157 // GRMZM2G413647 // GRMZM2G091837 // GRMZM2G110509 // GRMZM2G165757 // GRMZM2G064302 // GRMZM2G036759 // GRMZM2G040638 // GRMZM2G333861 // GRMZM2G416964 // GRMZM5G843537 // GRMZM2G033375 // GRMZM2G034152 // GRMZM2G093595 // GRMZM2G113408 // GRMZM2G003385 // GRMZM2G156517 // GRMZM2G091228 // GRMZM2G000052 // GRMZM2G065480 // GRMZM2G007038 // GRMZM2G074122 // GRMZM2G308860 // GRMZM…
GO:0031328	P	positive regulation of cellular biosynthetic process	7	751	26	39203	2.3e-06	8.4e-05	// GRMZM2G046885 // GRMZM2G101058 // GRMZM2G033356 // GRMZM2G093595 // GRMZM2G094081 // GRMZM2G056600 // GRMZM2G145085
GO:0010604	P	positive regulation of macromolecule metabolic process	7	751	30	39203	5.1e-06	0.00018	// GRMZM2G046885 // GRMZM2G101058 // GRMZM2G033356 // GRMZM2G093595 // GRMZM2G094081 // GRMZM2G056600 // GRMZM2G145085
GO:0009893	P	positive regulation of metabolic process	7	751	30	39203	5.1e-06	0.00018	// GRMZM2G046885 // GRMZM2G101058 // GRMZM2G033356 // GRMZM2G093595 // GRMZM2G094081 // GRMZM2G056600 // GRMZM2G145085
GO:0031325	P	positive regulation of cellular metabolic process	7	751	30	39203	5.1e-06	0.00018	// GRMZM2G046885 // GRMZM2G101058 // GRMZM2G033356 // GRMZM2G093595 // GRMZM2G094081 // GRMZM2G056600 // GRMZM2G145085
GO:0006631	P	fatty acid metabolic process	15	751	187	39203	7.5e-06	0.00026	// GRMZM2G057086 // GRMZM2G163683 // GRMZM2G078373 // GRMZM5G830329 // GRMZM5G829544 // GRMZM2G135498 // GRMZM2G003526 // GRMZM5G828302 // AC197146.3_FG002 // GRMZM2G104626 // GRMZM2G083526 // GRMZM2G364597 // GRMZM2G117746 // GRMZM2G000236 // GRMZM2G350020
GO:0018904	P	organic ether metabolic process	5	751	11	39203	8.5e-06	0.00027	// GRMZM2G025954 // GRMZM5G892522 // GRMZM2G031568 // GRMZM2G093595 // GRMZM2G102382
GO:0006662	P	glycerol ether metabolic process	5	751	11	39203	8.5e-06	0.00027	// GRMZM2G025954 // GRMZM5G892522 // GRMZM2G031568 // GRMZM2G093595 // GRMZM2G102382
GO:0032259	P	methylation	11	751	100	39203	8.3e-06	0.00027	// GRMZM2G149681 // GRMZM2G000052 // GRMZM2G016546 // GRMZM2G099729 // GRMZM2G032104 // GRMZM2G360389 // GRMZM2G149865 // GRMZM2G104730 // GRMZM2G405503 // GRMZM2G061401 // GRMZM2G179220
GO:0006730	P	one-carbon metabolic process	12	751	124	39203	1.1e-05	0.00034	// GRMZM2G149681 // GRMZM2G000052 // GRMZM2G016546 // GRMZM2G099729 // GRMZM2G032104 // GRMZM2G360389 // GRMZM2G061135 // GRMZM2G149865 // GRMZM2G104730 // GRMZM2G405503 // GRMZM2G061401 // GRMZM2G179220
GO:0019748	P	secondary metabolic process	10	751	94	39203	2.8e-05	0.00086	// GRMZM2G413647 // GRMZM2G345717 // GRMZM2G061135 // GRMZM2G493395 // GRMZM2G046583 // GRMZM2G038170 // GRMZM2G058404 // GRMZM5G891282 // GRMZM2G091228 // GRMZM2G350020
GO:0006950	P	response to stress	90	751	3059	39203	4.8e-05	0.0014	// GRMZM2G099984 // GRMZM2G024668 // GRMZM2G040638 // GRMZM2G063850 // GRMZM2G086496 // GRMZM2G139900 // GRMZM2G119150 // GRMZM2G113408 // AC213600.3_FG002 // GRMZM2G120652 // GRMZM2G117707 // GRMZM2G310410 // GRMZM2G087955 // GRMZM2G112165 // GRMZM2G392975 // GRMZM2G168416 // GRMZM2G096585 // GRMZM5G833389 // GRMZM2G007729 // GRMZM2G175562 // GRMZM2G348956 // GRMZM2G421541 // GRMZM2G134341 // GR…
GO:0009056	P	catabolic process	39	751	1005	39203	4.8e-05	0.0014	// GRMZM2G157157 // GRMZM2G413647 // GRMZM2G091837 // GRMZM2G110509 // GRMZM5G843537 // GRMZM2G036759 // GRMZM2G040638 // GRMZM2G005633 // GRMZM2G333861 // GRMZM2G416964 // GRMZM2G064302 // GRMZM2G033375 // GRMZM2G034152 // GRMZM2G093595 // GRMZM2G165757 // GRMZM2G113408 // GRMZM2G003385 // GRMZM2G156517 // GRMZM2G091228 // GRMZM2G000052 // GRMZM2G065480 // GRMZM2G007038 // GRMZM2G074122 // GRMZM…
GO:0009628	P	response to abiotic stimulus	61	751	1856	39203	5e-05	0.0015	// GRMZM2G046885 // GRMZM2G025387 // GRMZM2G492252 // GRMZM2G099984 // GRMZM2G096585 // GRMZM2G134341 // GRMZM2G375504 // GRMZM2G437100 // GRMZM2G062396 // GRMZM2G415793 // GRMZM2G063850 // GRMZM2G086496 // GRMZM2G001160 // GRMZM2G158835 // GRMZM2G152891 // GRMZM2G033356 // GRMZM5G865943 // GRMZM2G139900 // GRMZM2G093595 // GRMZM2G094081 // GRMZM2G061135 // GRMZM2G332838 // GRMZM2G057408 // GRMZM…
GO:0010608	P	posttranscriptional regulation of gene expression	6	751	31	39203	6.1e-05	0.0018	// GRMZM5G835323 // GRMZM2G024668 // GRMZM2G035890 // GRMZM2G121309 // GRMZM2G035465 // GRMZM2G012631
GO:0019725	P	cellular homeostasis	16	751	255	39203	6.4e-05	0.0018	// GRMZM2G011592 // GRMZM2G056014 // GRMZM5G822426 // GRMZM2G009968 // GRMZM2G025954 // GRMZM5G825090 // GRMZM2G150337 // GRMZM2G134957 // GRMZM5G892522 // GRMZM2G318180 // GRMZM2G008647 // GRMZM2G102382 // GRMZM2G008859 // GRMZM2G462140 // GRMZM2G303044 // GRMZM2G173978
GO:0046039	P	GTP metabolic process	6	751	33	39203	8.3e-05	0.0023	// GRMZM2G157157 // GRMZM2G316232 // GRMZM5G833747 // GRMZM2G110509 // GRMZM2G154218 // GRMZM2G007038
GO:0006952	P	defense response	27	751	608	39203	8.8e-05	0.0024	// GRMZM2G024668 // GRMZM2G040309 // GRMZM2G005633 // GRMZM2G333861 // GRMZM2G368151 // GRMZM2G119370 // GRMZM2G091088 // AC230011.2_FG002 // GRMZM2G119150 // GRMZM2G368890 // AC213600.3_FG002 // AC197146.3_FG002 // GRMZM2G085941 // GRMZM2G091228 // GRMZM2G357620 // GRMZM2G158835 // GRMZM2G092474 // GRMZM2G379898 // GRMZM2G012631 // GRMZM2G168416 // GRMZM5G833406 // GRMZM2G003625 // GRMZM2G150337…
GO:0032268	P	regulation of cellular protein metabolic process	6	751	34	39203	9.6e-05	0.0026	// GRMZM5G835323 // GRMZM2G035890 // GRMZM2G121309 // GRMZM2G035465 // GRMZM2G053722 // GRMZM2G175562
GO:0006633	P	fatty acid biosynthetic process	12	751	159	39203	0.0001	0.0028	// GRMZM2G057086 // GRMZM2G163683 // GRMZM2G078373 // GRMZM5G829544 // GRMZM2G135498 // GRMZM2G003526 // AC197146.3_FG002 // GRMZM2G104626 // GRMZM2G083526 // GRMZM2G364597 // GRMZM2G117746 // GRMZM2G000236
GO:0016053	P	organic acid biosynthetic process	23	751	492	39203	0.00014	0.0037	// GRMZM2G163683 // GRMZM2G078373 // GRMZM5G829544 // GRMZM2G375504 // GRMZM2G323719 // GRMZM2G104546 // GRMZM2G083526 // GRMZM2G364597 // GRMZM2G119150 // GRMZM2G150014 // GRMZM2G061135 // GRMZM2G313272 // AC197146.3_FG002 // GRMZM2G143357 // GRMZM2G117707 // GRMZM2G003526 // GRMZM2G117746 // GRMZM2G000236 // GRMZM2G057086 // GRMZM2G135498 // GRMZM2G061777 // GRMZM2G141810 // GRMZM2G104626
GO:0046394	P	carboxylic acid biosynthetic process	23	751	492	39203	0.00014	0.0037	// GRMZM2G163683 // GRMZM2G078373 // GRMZM5G829544 // GRMZM2G375504 // GRMZM2G323719 // GRMZM2G104546 // GRMZM2G083526 // GRMZM2G364597 // GRMZM2G119150 // GRMZM2G150014 // GRMZM2G061135 // GRMZM2G313272 // AC197146.3_FG002 // GRMZM2G143357 // GRMZM2G117707 // GRMZM2G003526 // GRMZM2G117746 // GRMZM2G000236 // GRMZM2G057086 // GRMZM2G135498 // GRMZM2G061777 // GRMZM2G141810 // GRMZM2G104626
GO:0006629	P	lipid metabolic process	39	751	1068	39203	0.00016	0.0041	// GRMZM2G124671 // GRMZM2G163683 // GRMZM2G109967 // GRMZM2G078373 // GRMZM5G829544 // GRMZM2G493395 // GRMZM2G135498 // GRMZM2G364597 // GRMZM2G039385 // GRMZM2G101000 // GRMZM5G865943 // GRMZM2G093595 // GRMZM2G130528 // GRMZM2G045716 // GRMZM2G083526 // GRMZM5G860072 // AC197146.3_FG002 // GRMZM2G031568 // GRMZM5G830329 // GRMZM2G076392 // GRMZM2G313737 // GRMZM5G873767 // GRMZM2G094900 // GR…
GO:0034220	P	ion transmembrane transport	12	751	170	39203	0.00019	0.0047	// GRMZM2G025387 // GRMZM2G383088 // GRMZM2G150337 // GRMZM2G144420 // GRMZM2G131575 // GRMZM2G036908 // GRMZM2G113408 // GRMZM2G104730 // GRMZM2G028432 // GRMZM2G008859 // GRMZM2G006977 // GRMZM2G357620
GO:0032535	P	regulation of cellular component size	5	751	27	39203	0.00031	0.0075	// GRMZM2G065635 // GRMZM2G073003 // GRMZM2G132032 // GRMZM2G117746 // GRMZM2G056600
GO:0090066	P	regulation of anatomical structure size	5	751	27	39203	0.00031	0.0075	// GRMZM2G065635 // GRMZM2G073003 // GRMZM2G132032 // GRMZM2G117746 // GRMZM2G056600
GO:0015674	P	di-, tri-valent inorganic cation transport	8	751	91	39203	0.00057	0.014	// GRMZM2G011592 // GRMZM2G150337 // GRMZM2G144420 // GRMZM2G104730 // GRMZM2G008859 // GRMZM2G006977 // GRMZM2G357620 // GRMZM2G478568
GO:0046486	P	glycerolipid metabolic process	8	751	93	39203	0.00065	0.016	// GRMZM2G076392 // GRMZM2G039385 // GRMZM2G109967 // GRMZM5G865943 // GRMZM2G093595 // GRMZM2G094900 // GRMZM2G101000 // GRMZM2G031568
GO:0019220	P	regulation of phosphate metabolic process	5	751	33	39203	0.0007	0.016	// GRMZM2G138886 // GRMZM2G053722 // GRMZM2G175562 // GRMZM2G073003 // GRMZM2G382537
GO:0006816	P	calcium ion transport	6	751	51	39203	0.00069	0.016	// GRMZM2G011592 // GRMZM2G150337 // GRMZM2G144420 // GRMZM2G104730 // GRMZM2G006977 // GRMZM2G357620
GO:0070838	P	divalent metal ion transport	6	751	51	39203	0.00069	0.016	// GRMZM2G011592 // GRMZM2G150337 // GRMZM2G144420 // GRMZM2G104730 // GRMZM2G006977 // GRMZM2G357620
GO:0051174	P	regulation of phosphorus metabolic process	5	751	33	39203	0.0007	0.016	// GRMZM2G138886 // GRMZM2G053722 // GRMZM2G175562 // GRMZM2G073003 // GRMZM2G382537
GO:0007242	P	intracellular signaling cascade	20	751	455	39203	0.00078	0.017	// GRMZM2G152891 // GRMZM2G166297 // GRMZM2G492252 // GRMZM2G152929 // GRMZM2G093595 // GRMZM2G065635 // GRMZM2G702026 // GRMZM2G171073 // GRMZM2G176495 // GRMZM2G119150 // GRMZM2G025387 // AC210013.4_FG014 // GRMZM2G010046 // GRMZM2G104125 // GRMZM2G086971 // GRMZM2G056600 // GRMZM2G121309 // GRMZM2G035465 // GRMZM2G318180 // GRMZM5G865943
GO:0008610	P	lipid biosynthetic process	20	751	461	39203	0.00091	0.02	// GRMZM2G039385 // GRMZM2G163683 // GRMZM2G109967 // GRMZM2G078373 // GRMZM2G057086 // GRMZM2G083526 // GRMZM2G143646 // GRMZM5G829544 // GRMZM2G135498 // GRMZM2G493395 // GRMZM2G003526 // GRMZM2G364597 // GRMZM2G058404 // GRMZM2G034697 // AC197146.3_FG002 // GRMZM2G104626 // GRMZM2G152888 // GRMZM2G031568 // GRMZM2G117746 // GRMZM2G000236
GO:0048878	P	chemical homeostasis	6	751	55	39203	0.001	0.021	// GRMZM2G011592 // GRMZM2G056014 // GRMZM2G150337 // GRMZM2G029219 // GRMZM2G008859 // GRMZM2G357620
GO:0050801	P	ion homeostasis	6	751	55	39203	0.001	0.021	// GRMZM2G011592 // GRMZM2G056014 // GRMZM2G150337 // GRMZM2G029219 // GRMZM2G008859 // GRMZM2G357620
GO:0019953	P	sexual reproduction	8	751	101	39203	0.0011	0.023	// GRMZM2G057086 // GRMZM2G065203 // GRMZM2G059785 // GRMZM2G316232 // GRMZM2G455243 // GRMZM2G115047 // GRMZM2G083526 // GRMZM2G346113
GO:0045454	P	cell redox homeostasis	12	751	225	39203	0.0019	0.04	// GRMZM5G822426 // GRMZM2G009968 // GRMZM2G025954 // GRMZM5G825090 // GRMZM2G134957 // GRMZM5G892522 // GRMZM2G318180 // GRMZM2G008647 // GRMZM2G102382 // GRMZM2G462140 // GRMZM2G303044 // GRMZM2G173978
GO:0006753	P	nucleoside phosphate metabolic process	22	751	567	39203	0.002	0.041	// GRMZM2G157157 // GRMZM2G413647 // GRMZM2G110509 // GRMZM2G165757 // AC234185.1_FG004 // GRMZM2G131575 // GRMZM2G113408 // GRMZM2G152040 // GRMZM5G833747 // GRMZM2G150014 // GRMZM5G843537 // GRMZM2G086714 // GRMZM2G065480 // GRMZM2G046583 // GRMZM2G007038 // GRMZM2G308860 // GRMZM2G432480 // GRMZM2G154218 // GRMZM2G119345 // GRMZM2G316232 // GRMZM5G891282 // GRMZM2G035520
GO:0009117	P	nucleotide metabolic process	22	751	567	39203	0.002	0.041	// GRMZM2G157157 // GRMZM2G413647 // GRMZM2G110509 // GRMZM2G165757 // AC234185.1_FG004 // GRMZM2G131575 // GRMZM2G113408 // GRMZM2G152040 // GRMZM5G833747 // GRMZM2G150014 // GRMZM5G843537 // GRMZM2G086714 // GRMZM2G065480 // GRMZM2G046583 // GRMZM2G007038 // GRMZM2G308860 // GRMZM2G432480 // GRMZM2G154218 // GRMZM2G119345 // GRMZM2G316232 // GRMZM5G891282 // GRMZM2G035520
GO:0042180	P	cellular ketone metabolic process	38	751	1198	39203	0.0023	0.047	// GRMZM2G163683 // GRMZM2G078373 // GRMZM5G829544 // GRMZM2G036759 // GRMZM2G323719 // GRMZM2G104546 // GRMZM2G135970 // GRMZM2G333861 // GRMZM2G364597 // GRMZM2G083526 // GRMZM5G865943 // GRMZM2G119150 // GRMZM2G150014 // GRMZM2G061135 // GRMZM2G313272 // GRMZM2G120652 // GRMZM2G143357 // GRMZM2G085941 // GRMZM5G830329 // GRMZM2G478568 // GRMZM2G106376 // GRMZM2G383088 // GRMZM2G117707 // GRMZM…
GO:0055086	P	nucleobase, nucleoside and nucleotide metabolic process	23	751	619	39203	0.0027	0.054	// GRMZM2G157157 // GRMZM2G413647 // GRMZM2G110509 // GRMZM2G165757 // AC234185.1_FG004 // GRMZM2G131575 // GRMZM2G113408 // GRMZM2G152040 // GRMZM5G833747 // GRMZM2G150014 // GRMZM2G061135 // GRMZM5G843537 // GRMZM2G086714 // GRMZM2G065480 // GRMZM2G046583 // GRMZM2G007038 // GRMZM2G308860 // GRMZM2G432480 // GRMZM2G154218 // GRMZM2G119345 // GRMZM2G316232 // GRMZM5G891282 // GRMZM2G035520
GO:0032501	P	multicellular organismal process	56	751	1983	39203	0.0032	0.063	// GRMZM2G046885 // GRMZM5G891282 // GRMZM2G104074 // GRMZM2G003514 // AC215201.3_FG005 // GRMZM5G830329 // GRMZM2G008751 // GRMZM2G375504 // GRMZM5G842058 // GRMZM2G702026 // GRMZM2G005633 // GRMZM2G333861 // GRMZM2G162295 // GRMZM2G012631 // GRMZM2G152891 // GRMZM2G033356 // GRMZM2G039934 // GRMZM2G316232 // GRMZM2G119150 // GRMZM2G150014 // GRMZM2G094081 // GRMZM2G115047 // GRMZM2G072658 // GR…
GO:0043436	P	oxoacid metabolic process	37	751	1186	39203	0.0035	0.067	// GRMZM2G163683 // GRMZM2G078373 // GRMZM5G829544 // GRMZM2G036759 // GRMZM2G323719 // GRMZM2G104546 // GRMZM2G135970 // GRMZM2G333861 // GRMZM2G364597 // GRMZM2G083526 // GRMZM5G865943 // GRMZM2G119150 // GRMZM2G150014 // GRMZM2G061135 // GRMZM2G313272 // GRMZM2G120652 // GRMZM2G143357 // GRMZM2G085941 // GRMZM5G830329 // GRMZM2G478568 // GRMZM2G106376 // GRMZM2G383088 // GRMZM2G117707 // GRMZM…
GO:0019752	P	carboxylic acid metabolic process	37	751	1186	39203	0.0035	0.067	// GRMZM2G163683 // GRMZM2G078373 // GRMZM5G829544 // GRMZM2G036759 // GRMZM2G323719 // GRMZM2G104546 // GRMZM2G135970 // GRMZM2G333861 // GRMZM2G364597 // GRMZM2G083526 // GRMZM5G865943 // GRMZM2G119150 // GRMZM2G150014 // GRMZM2G061135 // GRMZM2G313272 // GRMZM2G120652 // GRMZM2G143357 // GRMZM2G085941 // GRMZM5G830329 // GRMZM2G478568 // GRMZM2G106376 // GRMZM2G383088 // GRMZM2G117707 // GRMZM…
GO:0006082	P	organic acid metabolic process	37	751	1188	39203	0.0035	0.068	// GRMZM2G163683 // GRMZM2G078373 // GRMZM5G829544 // GRMZM2G036759 // GRMZM2G323719 // GRMZM2G104546 // GRMZM2G135970 // GRMZM2G333861 // GRMZM2G364597 // GRMZM2G083526 // GRMZM5G865943 // GRMZM2G119150 // GRMZM2G150014 // GRMZM2G061135 // GRMZM2G313272 // GRMZM2G120652 // GRMZM2G143357 // GRMZM2G085941 // GRMZM5G830329 // GRMZM2G478568 // GRMZM2G106376 // GRMZM2G383088 // GRMZM2G117707 // GRMZM…
GO:0046483	P	heterocycle metabolic process	27	751	797	39203	0.0042	0.079	// GRMZM2G157157 // GRMZM2G091837 // GRMZM2G110509 // GRMZM2G147955 // AC234185.1_FG004 // GRMZM2G131575 // GRMZM2G375504 // GRMZM2G086845 // GRMZM2G113408 // GRMZM5G833747 // GRMZM2G165757 // GRMZM5G843537 // GRMZM2G120652 // GRMZM2G091228 // GRMZM2G478568 // GRMZM2G106376 // GRMZM2G065480 // GRMZM2G007038 // GRMZM2G308860 // GRMZM2G323719 // GRMZM2G432480 // GRMZM2G154218 // GRMZM2G119345 // GR…
GO:0009199	P	ribonucleoside triphosphate metabolic process	15	751	354	39203	0.0046	0.085	// GRMZM2G308860 // GRMZM5G843537 // GRMZM2G432480 // GRMZM2G157157 // GRMZM5G833747 // GRMZM2G110509 // GRMZM2G165757 // GRMZM2G119345 // GRMZM2G131575 // GRMZM2G065480 // GRMZM2G113408 // GRMZM2G316232 // GRMZM2G154218 // GRMZM2G007038 // GRMZM2G035520
GO:0009205	P	purine ribonucleoside triphosphate metabolic process	15	751	354	39203	0.0046	0.085	// GRMZM2G308860 // GRMZM5G843537 // GRMZM2G432480 // GRMZM2G157157 // GRMZM5G833747 // GRMZM2G110509 // GRMZM2G165757 // GRMZM2G119345 // GRMZM2G131575 // GRMZM2G065480 // GRMZM2G113408 // GRMZM2G316232 // GRMZM2G154218 // GRMZM2G007038 // GRMZM2G035520
GO:0009144	P	purine nucleoside triphosphate metabolic process	15	751	354	39203	0.0046	0.085	// GRMZM2G308860 // GRMZM5G843537 // GRMZM2G432480 // GRMZM2G157157 // GRMZM5G833747 // GRMZM2G110509 // GRMZM2G165757 // GRMZM2G119345 // GRMZM2G131575 // GRMZM2G065480 // GRMZM2G113408 // GRMZM2G316232 // GRMZM2G154218 // GRMZM2G007038 // GRMZM2G035520
GO:0009141	P	nucleoside triphosphate metabolic process	15	751	356	39203	0.0049	0.088	// GRMZM2G308860 // GRMZM5G843537 // GRMZM2G432480 // GRMZM2G157157 // GRMZM5G833747 // GRMZM2G110509 // GRMZM2G165757 // GRMZM2G119345 // GRMZM2G131575 // GRMZM2G065480 // GRMZM2G113408 // GRMZM2G316232 // GRMZM2G154218 // GRMZM2G007038 // GRMZM2G035520
GO:0055080	P	cation homeostasis	5	751	55	39203	0.0054	0.095	// GRMZM2G150337 // GRMZM2G008859 // GRMZM2G056014 // GRMZM2G029219 // GRMZM2G011592
GO:0007049	P	cell cycle	5	751	55	39203	0.0054	0.095	// GRMZM2G047143 // GRMZM2G138886 // GRMZM2G073003 // GRMZM2G100473 // GRMZM2G071264
GO:0006996	P	organelle organization	23	751	657	39203	0.0054	0.095	// GRMZM2G152419 // GRMZM2G107645 // AC215201.3_FG005 // GRMZM2G448458 // GRMZM2G136143 // GRMZM2G077991 // GRMZM2G077942 // GRMZM2G112912 // GRMZM2G106133 // GRMZM2G072855 // GRMZM2G063896 // GRMZM2G050556 // GRMZM2G332838 // GRMZM2G345717 // GRMZM2G100473 // GRMZM2G339503 // GRMZM2G111201 // GRMZM2G055450 // GRMZM2G119071 // GRMZM2G135498 // GRMZM2G047143 // GRMZM5G828302 // AC233865.1_FG001
GO:0016051	P	carbohydrate biosynthetic process	13	751	293	39203	0.0057	0.098	// GRMZM2G113432 // GRMZM2G044744 // GRMZM2G103972 // GRMZM2G174675 // GRMZM2G033208 // GRMZM2G137707 // GRMZM2G086845 // GRMZM2G460864 // GRMZM5G891282 // GRMZM2G084515 // GRMZM2G118462 // GRMZM2G110145 // GRMZM2G032628
GO:0009856	P	pollination	5	751	56	39203	0.0058	0.099	// GRMZM2G057086 // GRMZM2G132032 // GRMZM2G422340 // GRMZM2G117250 // GRMZM2G152891
GO:0007154	P	cell communication	11	751	229	39203	0.0061	0.1	// GRMZM2G166297 // GRMZM2G492252 // GRMZM2G422340 // GRMZM5G865943 // GRMZM2G171073 // GRMZM2G176495 // GRMZM2G055575 // GRMZM2G117250 // GRMZM2G001160 // GRMZM2G056600 // GRMZM2G035134
GO:0023046	P	signaling process	26	751	783	39203	0.0062	0.1	// GRMZM2G025387 // GRMZM2G065635 // GRMZM2G119150 // GRMZM2G702026 // GRMZM2G035465 // GRMZM2G152891 // GRMZM2G098474 // GRMZM5G865943 // GRMZM2G093595 // GRMZM2G340359 // GRMZM2G056600 // GRMZM2G121309 // GRMZM2G148056 // GRMZM2G176495 // GRMZM2G086971 // GRMZM2G318180 // GRMZM2G409974 // GRMZM2G166297 // GRMZM2G152929 // GRMZM2G010046 // GRMZM2G171073 // GRMZM2G492252 // GRMZM2G055575 // AC210…
GO:0023060	P	signal transmission	26	751	783	39203	0.0062	0.1	// GRMZM2G025387 // GRMZM2G065635 // GRMZM2G119150 // GRMZM2G702026 // GRMZM2G035465 // GRMZM2G152891 // GRMZM2G098474 // GRMZM5G865943 // GRMZM2G093595 // GRMZM2G340359 // GRMZM2G056600 // GRMZM2G121309 // GRMZM2G148056 // GRMZM2G176495 // GRMZM2G086971 // GRMZM2G318180 // GRMZM2G409974 // GRMZM2G166297 // GRMZM2G152929 // GRMZM2G010046 // GRMZM2G171073 // GRMZM2G492252 // GRMZM2G055575 // AC210…
GO:0009987	P	cellular process	388	751	18476	39203	0.0076	0.13	// GRMZM2G003514 // AC234185.1_FG004 // GRMZM2G360677 // GRMZM2G039385 // GRMZM2G139900 // GRMZM2G179981 // GRMZM2G074857 // GRMZM2G382537 // GRMZM2G031568 // GRMZM2G099231 // GRMZM2G097059 // GRMZM2G167018 // GRMZM2G093574 // GRMZM2G112165 // GRMZM2G169149 // GRMZM2G009282 // GRMZM2G303768 // GRMZM2G168416 // GRMZM2G072115 // GRMZM2G171073 // GRMZM2G176774 // GRMZM2G059562 // GRMZM2G034697 // GR…
GO:0042398	P	cellular amino acid derivative biosynthetic process	5	751	61	39203	0.0081	0.13	// GRMZM2G478568 // GRMZM2G031825 // GRMZM2G350020 // GRMZM2G345717 // GRMZM2G061135
GO:0006575	P	cellular amino acid derivative metabolic process	8	751	144	39203	0.0083	0.13	// GRMZM2G000052 // GRMZM5G865943 // GRMZM2G034152 // GRMZM2G345717 // GRMZM2G061135 // GRMZM2G350020 // GRMZM2G031825 // GRMZM2G478568
GO:0006979	P	response to oxidative stress	13	751	315	39203	0.0098	0.16	// GRMZM2G113408 // GRMZM2G031033 // GRMZM5G833747 // GRMZM2G405459 // GRMZM2G375504 // GRMZM2G437100 // GRMZM2G040638 // GRMZM2G063850 // GRMZM2G120652 // GRMZM2G405581 // GRMZM2G042347 // GRMZM2G131525 // GRMZM2G143460
GO:0015979	P	photosynthesis	8	751	149	39203	0.01	0.16	// GRMZM2G113033 // GRMZM2G114399 // GRMZM2G033208 // GRMZM2G034243 // GRMZM2G072174 // GRMZM2G155216 // GRMZM2G123371 // GRMZM2G175562
GO:0009150	P	purine ribonucleotide metabolic process	15	751	391	39203	0.011	0.17	// GRMZM2G308860 // GRMZM5G843537 // GRMZM2G432480 // GRMZM2G157157 // GRMZM5G833747 // GRMZM2G110509 // GRMZM2G165757 // GRMZM2G119345 // GRMZM2G131575 // GRMZM2G065480 // GRMZM2G113408 // GRMZM2G316232 // GRMZM2G154218 // GRMZM2G007038 // GRMZM2G035520
GO:0006650	P	glycerophospholipid metabolic process	6	751	93	39203	0.011	0.17	// GRMZM2G076392 // GRMZM2G039385 // GRMZM2G109967 // GRMZM5G865943 // GRMZM2G094900 // GRMZM2G101000
GO:0044271	P	cellular nitrogen compound biosynthetic process	19	751	549	39203	0.012	0.19	// GRMZM2G104546 // GRMZM2G106376 // GRMZM2G375504 // GRMZM2G117707 // GRMZM2G147955 // GRMZM2G152888 // GRMZM2G119150 // GRMZM2G150014 // GRMZM2G061777 // GRMZM2G323719 // GRMZM5G891282 // GRMZM2G341723 // GRMZM2G046583 // GRMZM2G313272 // GRMZM2G141810 // GRMZM2G143357 // GRMZM2G061135 // GRMZM2G103152 // GRMZM2G478568
GO:0007165	P	signal transduction	23	751	711	39203	0.013	0.2	// GRMZM2G025387 // GRMZM2G065635 // GRMZM2G119150 // GRMZM2G702026 // GRMZM2G035465 // GRMZM2G152891 // GRMZM5G865943 // GRMZM2G093595 // GRMZM2G340359 // GRMZM2G056600 // GRMZM2G121309 // GRMZM2G176495 // GRMZM2G086971 // GRMZM2G318180 // GRMZM2G166297 // GRMZM2G152929 // GRMZM2G010046 // GRMZM2G171073 // GRMZM2G492252 // GRMZM2G055575 // AC210013.4_FG014 // GRMZM2G104125 // GRMZM2G176506
GO:0006073	P	cellular glucan metabolic process	9	751	191	39203	0.014	0.21	// GRMZM2G113432 // GRMZM2G044744 // GRMZM2G388684 // GRMZM2G086845 // GRMZM5G891282 // GRMZM2G009282 // GRMZM2G103972 // GRMZM2G110145 // GRMZM2G032628
GO:0065009	P	regulation of molecular function	11	751	258	39203	0.014	0.21	// GRMZM2G138886 // GRMZM2G025387 // GRMZM2G025954 // GRMZM2G176495 // GRMZM2G108849 // GRMZM2G074857 // GRMZM2G073003 // GRMZM2G382537 // GRMZM5G892522 // GRMZM2G132032 // GRMZM2G304548
GO:0044042	P	glucan metabolic process	9	751	191	39203	0.014	0.21	// GRMZM2G113432 // GRMZM2G044744 // GRMZM2G388684 // GRMZM2G086845 // GRMZM5G891282 // GRMZM2G009282 // GRMZM2G103972 // GRMZM2G110145 // GRMZM2G032628
GO:0006163	P	purine nucleotide metabolic process	15	751	404	39203	0.014	0.21	// GRMZM2G308860 // GRMZM5G843537 // GRMZM2G432480 // GRMZM2G157157 // GRMZM5G833747 // GRMZM2G110509 // GRMZM2G165757 // GRMZM2G119345 // GRMZM2G131575 // GRMZM2G065480 // GRMZM2G113408 // GRMZM2G316232 // GRMZM2G154218 // GRMZM2G007038 // GRMZM2G035520
GO:0009259	P	ribonucleotide metabolic process	15	751	405	39203	0.014	0.21	// GRMZM2G308860 // GRMZM5G843537 // GRMZM2G432480 // GRMZM2G157157 // GRMZM5G833747 // GRMZM2G110509 // GRMZM2G165757 // GRMZM2G119345 // GRMZM2G131575 // GRMZM2G065480 // GRMZM2G113408 // GRMZM2G316232 // GRMZM2G154218 // GRMZM2G007038 // GRMZM2G035520
GO:0019438	P	aromatic compound biosynthetic process	6	751	104	39203	0.018	0.26	// GRMZM2G106376 // GRMZM2G117707 // GRMZM2G345717 // GRMZM2G061135 // GRMZM2G350020 // GRMZM5G830329
GO:0055085	P	transmembrane transport	39	751	1420	39203	0.019	0.27	// GRMZM2G025387 // GRMZM5G812538 // GRMZM2G136508 // GRMZM2G073954 // GRMZM2G131575 // GRMZM2G455124 // GRMZM2G040309 // GRMZM2G120563 // GRMZM2G029219 // GRMZM2G174458 // GRMZM5G843537 // GRMZM2G169363 // GRMZM2G160460 // GRMZM2G032555 // GRMZM2G363229 // GRMZM2G113408 // GRMZM2G105085 // GRMZM2G119970 // GRMZM2G479703 // GRMZM2G357620 // GRMZM2G090627 // GRMZM2G383088 // GRMZM2G087479 // GRMZM…
GO:0006732	P	coenzyme metabolic process	10	751	237	39203	0.019	0.28	// GRMZM2G106376 // GRMZM2G099729 // GRMZM2G413647 // GRMZM2G036759 // GRMZM2G046583 // GRMZM2G033515 // GRMZM5G891282 // GRMZM2G120652 // GRMZM2G031825 // GRMZM2G074122
GO:0009250	P	glucan biosynthetic process	7	751	143	39203	0.024	0.34	// GRMZM2G113432 // GRMZM2G044744 // GRMZM2G086845 // GRMZM5G891282 // GRMZM2G103972 // GRMZM2G110145 // GRMZM2G032628
GO:0050790	P	regulation of catalytic activity	10	751	255	39203	0.029	0.41	// GRMZM2G138886 // GRMZM2G025954 // GRMZM2G176495 // GRMZM2G108849 // GRMZM2G074857 // GRMZM2G073003 // GRMZM2G382537 // GRMZM5G892522 // GRMZM2G132032 // GRMZM2G304548
GO:0006766	P	vitamin metabolic process	5	751	88	39203	0.031	0.43	// GRMZM2G341723 // GRMZM2G120652 // GRMZM2G046583 // GRMZM2G099729 // GRMZM2G103152
GO:0009110	P	vitamin biosynthetic process	5	751	88	39203	0.031	0.43	// GRMZM2G341723 // GRMZM2G120652 // GRMZM2G046583 // GRMZM2G099729 // GRMZM2G103152
GO:0006644	P	phospholipid metabolic process	7	751	153	39203	0.032	0.44	// GRMZM2G076392 // GRMZM2G039385 // GRMZM2G109967 // GRMZM5G865943 // GRMZM2G034697 // GRMZM2G094900 // GRMZM2G101000
GO:0006605	P	protein targeting	5	751	89	39203	0.032	0.44	// GRMZM2G046885 // GRMZM2G008859 // GRMZM2G339503 // GRMZM5G828302 // GRMZM2G156174
GO:0016043	P	cellular component organization	34	751	1290	39203	0.043	0.58	// GRMZM2G452026 // GRMZM2G152419 // GRMZM2G107645 // GRMZM2G065635 // AC215201.3_FG005 // GRMZM2G448458 // GRMZM2G063896 // GRMZM5G842058 // GRMZM2G145085 // GRMZM2G136143 // GRMZM2G332838 // GRMZM2G077942 // GRMZM2G112912 // GRMZM2G106133 // GRMZM2G132032 // GRMZM2G072855 // GRMZM5G830329 // GRMZM2G050556 // GRMZM2G071264 // GRMZM2G077991 // GRMZM2G345717 // GRMZM2G436429 // GRMZM2G339503 // GR…
GO:0016311	P	dephosphorylation	7	751	165	39203	0.045	0.6	// GRMZM2G166297 // GRMZM2G035134 // GRMZM2G094900 // GRMZM2G101000 // GRMZM2G053722 // GRMZM2G175562 // GRMZM2G124179
GO:0000271	P	polysaccharide biosynthetic process	8	751	201	39203	0.045	0.6	// GRMZM2G113432 // GRMZM2G044744 // GRMZM2G137707 // GRMZM2G086845 // GRMZM5G891282 // GRMZM2G103972 // GRMZM2G110145 // GRMZM2G032628
GO:0044264	P	cellular polysaccharide metabolic process	9	751	243	39203	0.05	0.66	// GRMZM2G113432 // GRMZM2G044744 // GRMZM2G388684 // GRMZM2G086845 // GRMZM5G891282 // GRMZM2G009282 // GRMZM2G103972 // GRMZM2G110145 // GRMZM2G032628
GO:0009119	P	ribonucleoside metabolic process	5	751	101	39203	0.05	0.66	// GRMZM5G833747 // GRMZM2G086714 // GRMZM2G152040 // GRMZM5G891282 // GRMZM2G061135
GO:0006955	P	immune response	12	751	360	39203	0.05	0.66	// GRMZM2G092474 // GRMZM2G158835 // GRMZM5G833406 // GRMZM2G156174 // GRMZM2G150337 // GRMZM2G119150 // GRMZM2G117971 // GRMZM2G436429 // GRMZM2G379898 // AC197146.3_FG002 // GRMZM2G085941 // GRMZM2G368151
GO:0002376	P	immune system process	12	751	363	39203	0.053	0.69	// GRMZM2G092474 // GRMZM2G158835 // GRMZM5G833406 // GRMZM2G156174 // GRMZM2G150337 // GRMZM2G119150 // GRMZM2G117971 // GRMZM2G436429 // GRMZM2G379898 // AC197146.3_FG002 // GRMZM2G085941 // GRMZM2G368151
GO:0034637	P	cellular carbohydrate biosynthetic process	10	751	285	39203	0.054	0.69	// GRMZM2G113432 // GRMZM2G044744 // GRMZM2G174675 // GRMZM2G086845 // GRMZM2G460864 // GRMZM5G891282 // GRMZM2G118462 // GRMZM2G103972 // GRMZM2G110145 // GRMZM2G032628
GO:0030001	P	metal ion transport	18	751	616	39203	0.057	0.72	// GRMZM2G011592 // GRMZM2G056014 // GRMZM2G102786 // GRMZM2G150337 // GRMZM2G144420 // GRMZM2G055575 // GRMZM2G104730 // GRMZM2G090149 // GRMZM2G036908 // GRMZM2G008290 // GRMZM2G383088 // GRMZM2G043932 // GRMZM2G123486 // GRMZM2G017894 // GRMZM2G008859 // GRMZM2G006977 // GRMZM2G357620 // GRMZM2G478568
GO:0005975	P	carbohydrate metabolic process	45	751	1828	39203	0.057	0.72	// GRMZM2G124671 // GRMZM2G113432 // GRMZM2G148167 // GRMZM2G035503 // GRMZM2G413647 // GRMZM2G019986 // GRMZM2G086845 // GRMZM2G164676 // GRMZM2G005633 // GRMZM2G084515 // GRMZM2G110145 // GRMZM2G025954 // GRMZM2G044744 // GRMZM2G181259 // GRMZM2G115065 // GRMZM2G388684 // GRMZM2G064302 // GRMZM2G034243 // GRMZM2G044096 // AC213600.3_FG002 // GRMZM2G460864 // GRMZM2G003385 // GRMZM2G103972 // GR…
GO:0005976	P	polysaccharide metabolic process	11	751	328	39203	0.057	0.72	// GRMZM2G113432 // GRMZM2G044744 // GRMZM2G388684 // GRMZM2G137707 // GRMZM2G086845 // GRMZM5G891282 // GRMZM2G005633 // GRMZM2G009282 // GRMZM2G103972 // GRMZM2G110145 // GRMZM2G032628
GO:0009108	P	coenzyme biosynthetic process	5	751	107	39203	0.061	0.76	// GRMZM2G120652 // GRMZM2G106376 // GRMZM2G046583 // GRMZM2G031825 // GRMZM2G099729
GO:0070647	P	protein modification by small protein conjugation or removal	6	751	142	39203	0.061	0.76	// GRMZM2G127690 // GRMZM2G492252 // GRMZM2G018059 // GRMZM2G108739 // GRMZM2G046848 // GRMZM2G156517
GO:0009966	P	regulation of signal transduction	6	751	144	39203	0.065	0.78	// GRMZM2G166297 // GRMZM2G492252 // GRMZM5G865943 // GRMZM2G171073 // GRMZM2G176495 // GRMZM2G056600
GO:0010646	P	regulation of cell communication	6	751	144	39203	0.065	0.78	// GRMZM2G166297 // GRMZM2G492252 // GRMZM5G865943 // GRMZM2G171073 // GRMZM2G176495 // GRMZM2G056600
GO:0023051	P	regulation of signaling process	6	751	144	39203	0.065	0.78	// GRMZM2G166297 // GRMZM2G492252 // GRMZM5G865943 // GRMZM2G171073 // GRMZM2G176495 // GRMZM2G056600
GO:0019637	P	organophosphate metabolic process	7	751	185	39203	0.072	0.86	// GRMZM2G076392 // GRMZM2G039385 // GRMZM2G109967 // GRMZM5G865943 // GRMZM2G034697 // GRMZM2G094900 // GRMZM2G101000
GO:0006457	P	protein folding	16	751	555	39203	0.076	0.9	// GRMZM5G813217 // GRMZM2G049373 // GRMZM2G108259 // GRMZM2G099909 // GRMZM2G150337 // AC215201.3_FG005 // GRMZM2G001956 // GRMZM2G535911 // GRMZM2G096585 // AC203985.4_FG005 // GRMZM2G128248 // GRMZM2G112165 // GRMZM2G109526 // GRMZM2G024668 // GRMZM2G012631 // GRMZM2G117746
GO:0009309	P	amine biosynthetic process	11	751	348	39203	0.079	0.93	// GRMZM2G117707 // GRMZM2G104546 // GRMZM2G119150 // GRMZM2G150014 // GRMZM2G061135 // GRMZM2G323719 // GRMZM2G061777 // GRMZM2G313272 // GRMZM2G143357 // GRMZM2G375504 // GRMZM2G478568
GO:0044262	P	cellular carbohydrate metabolic process	25	751	959	39203	0.081	0.96	// GRMZM2G113432 // GRMZM2G413647 // GRMZM2G019986 // GRMZM2G086845 // GRMZM2G110145 // GRMZM2G044744 // GRMZM2G388684 // GRMZM2G064302 // GRMZM2G044096 // AC213600.3_FG002 // GRMZM2G460864 // GRMZM2G003385 // GRMZM2G103972 // GRMZM2G091228 // GRMZM5G898915 // GRMZM2G141510 // GRMZM2G009282 // GRMZM2G174675 // GRMZM2G176774 // GRMZM5G833389 // GRMZM2G011624 // GRMZM5G891282 // GRMZM2G118462 // GR…
GO:0050789	P	regulation of biological process	99	751	4504	39203	0.085	1	// GRMZM2G125653 // GRMZM2G003514 // GRMZM2G024668 // GRMZM2G167018 // GRMZM2G316232 // GRMZM2G119150 // GRMZM2G382537 // GRMZM2G097059 // GRMZM2G313737 // GRMZM2G026157 // GRMZM2G003565 // GRMZM5G892522 // GRMZM2G130374 // GRMZM5G835323 // GRMZM2G152929 // GRMZM2G176506 // GRMZM2G059562 // GRMZM2G010046 // GRMZM2G357620 // GRMZM2G303044 // GRMZM2G057386 // GRMZM2G529859 // GRMZM2G009968 // GRMZM…
GO:0034728	P	nucleosome organization	9	751	322	39203	0.17	1	// GRMZM2G332838 // GRMZM2G077991 // GRMZM2G112912 // GRMZM2G448458 // GRMZM2G119071 // GRMZM2G106133 // GRMZM2G072855 // GRMZM2G063896 // AC233865.1_FG001
GO:0008104	P	protein localization	18	751	890	39203	0.44	1	// GRMZM2G046885 // GRMZM2G139624 // GRMZM2G157157 // GRMZM2G327680 // GRMZM2G156174 // GRMZM2G093595 // GRMZM5G828302 // GRMZM2G109526 // GRMZM2G069005 // GRMZM2G086971 // GRMZM2G436429 // GRMZM2G339503 // GRMZM2G008859 // GRMZM5G801241 // GRMZM2G021378 // GRMZM2G311328 // GRMZM2G131525 // GRMZM2G330772
GO:0080090	P	regulation of primary metabolic process	56	751	3595	39203	0.96	1	// GRMZM2G046885 // GRMZM2G138455 // GRMZM2G125653 // GRMZM2G003514 // GRMZM2G093595 // GRMZM2G167018 // GRMZM2G125243 // GRMZM2G521481 // GRMZM2G035465 // GRMZM2G053722 // GRMZM2G148056 // GRMZM2G104074 // GRMZM2G098474 // GRMZM2G123140 // GRMZM2G009530 // GRMZM2G044576 // GRMZM2G361376 // GRMZM2G702026 // GRMZM2G079470 // GRMZM2G094081 // GRMZM2G167576 // GRMZM2G003466 // GRMZM2G120320 // GRMZM…
GO:0019222	P	regulation of metabolic process	63	751	3667	39203	0.83	1	// GRMZM2G046885 // GRMZM2G138455 // GRMZM2G125653 // GRMZM2G003514 // GRMZM2G024668 // GRMZM2G167018 // GRMZM2G121309 // GRMZM2G521481 // GRMZM2G035465 // GRMZM2G053722 // GRMZM2G148056 // GRMZM2G104074 // GRMZM2G098474 // GRMZM2G123140 // GRMZM2G009530 // GRMZM2G044576 // GRMZM2G176506 // GRMZM2G361376 // GRMZM2G702026 // GRMZM2G079470 // GRMZM2G094081 // GRMZM2G167576 // GRMZM2G003466 // GRMZM…
GO:0009165	P	nucleotide biosynthetic process	6	751	456	39203	0.87	1	// GRMZM5G833747 // AC234185.1_FG004 // GRMZM2G131575 // GRMZM2G113408 // GRMZM2G046583 // GRMZM2G035520
GO:0044282	P	small molecule catabolic process	10	751	405	39203	0.26	1	// GRMZM2G000052 // GRMZM2G413647 // GRMZM2G034152 // GRMZM5G833389 // GRMZM2G064302 // GRMZM5G891282 // GRMZM5G828302 // GRMZM2G003385 // GRMZM2G333861 // GRMZM2G123371
GO:0010556	P	regulation of macromolecule biosynthetic process	53	751	3393	39203	0.95	1	// GRMZM2G046885 // GRMZM2G138455 // GRMZM2G125653 // GRMZM2G003514 // GRMZM2G093595 // GRMZM2G167018 // GRMZM2G125243 // GRMZM2G521481 // GRMZM2G035465 // GRMZM2G148056 // GRMZM2G104074 // GRMZM2G098474 // GRMZM2G123140 // GRMZM2G009530 // GRMZM2G044576 // GRMZM2G361376 // GRMZM2G702026 // GRMZM2G079470 // GRMZM2G094081 // GRMZM2G167576 // GRMZM2G120320 // GRMZM2G035890 // GRMZM2G106133 // GRMZM…
GO:0070727	P	cellular macromolecule localization	13	751	562	39203	0.29	1	// GRMZM2G046885 // GRMZM2G330772 // GRMZM2G157157 // GRMZM2G139624 // GRMZM2G327680 // GRMZM2G156174 // GRMZM2G311328 // GRMZM5G828302 // GRMZM2G339503 // GRMZM2G008859 // GRMZM2G021378 // GRMZM2G091228 // GRMZM2G131525
GO:0009611	P	response to wounding	5	751	384	39203	0.86	1	// GRMZM2G117707 // GRMZM2G423898 // GRMZM2G055575 // GRMZM2G000236 // GRMZM2G345717
GO:0032446	P	protein modification by small protein conjugation	5	751	142	39203	0.14	1	// GRMZM2G046848 // GRMZM2G156517 // GRMZM2G492252 // GRMZM2G018059 // GRMZM2G127690
GO:0006260	P	DNA replication	6	751	202	39203	0.2	1	// GRMZM2G141948 // GRMZM2G369260 // GRMZM2G130351 // GRMZM2G455243 // AC196278.2_FG003 // GRMZM2G348956
GO:0016310	P	phosphorylation	51	751	2743	39203	0.61	1	// GRMZM2G025387 // GRMZM2G107645 // GRMZM2G018059 // GRMZM2G131575 // GRMZM2G086845 // GRMZM2G149051 // GRMZM2G104546 // GRMZM2G046848 // GRMZM2G101000 // GRMZM2G053722 // GRMZM2G176225 // GRMZM2G084806 // GRMZM2G461278 // GRMZM2G039934 // GRMZM5G833747 // GRMZM2G070252 // GRMZM2G150014 // GRMZM2G113408 // GRMZM2G072658 // GRMZM2G381076 // GRMZM2G382537 // GRMZM2G050701 // GRMZM2G076392 // GRMZM…
GO:0060255	P	regulation of macromolecule metabolic process	58	751	3632	39203	0.94	1	// GRMZM2G046885 // GRMZM2G138455 // GRMZM2G125653 // GRMZM2G003514 // GRMZM2G024668 // GRMZM2G167018 // GRMZM2G125243 // GRMZM2G521481 // GRMZM2G035465 // GRMZM2G053722 // GRMZM2G148056 // GRMZM2G104074 // GRMZM2G098474 // GRMZM2G123140 // GRMZM2G009530 // GRMZM2G044576 // GRMZM2G361376 // GRMZM2G702026 // GRMZM2G079470 // GRMZM2G094081 // GRMZM2G167576 // GRMZM2G120320 // GRMZM2G035890 // GRMZM…
GO:0046034	P	ATP metabolic process	9	751	321	39203	0.17	1	// GRMZM2G308860 // GRMZM5G843537 // GRMZM2G432480 // GRMZM2G165757 // GRMZM2G119345 // GRMZM2G131575 // GRMZM2G065480 // GRMZM2G113408 // GRMZM2G035520
GO:0030163	P	protein catabolic process	8	751	353	39203	0.37	1	// GRMZM2G055785 // GRMZM2G033375 // GRMZM2G091837 // GRMZM5G894518 // GRMZM2G108739 // GRMZM2G156517 // GRMZM2G121303 // GRMZM2G416964
GO:0055114	P	oxidation reduction	58	751	2743	39203	0.24	1	// GRMZM2G163683 // GRMZM2G375504 // GRMZM2G078373 // GRMZM2G413647 // GRMZM2G065635 // GRMZM2G035268 // GRMZM2G036759 // GRMZM2G040638 // GRMZM2G062396 // GRMZM2G129761 // GRMZM2G104546 // GRMZM2G462140 // GRMZM2G076225 // AC209987.4_FG002 // AC193500.3_FG003 // GRMZM2G052825 // GRMZM2G106408 // GRMZM2G034152 // GRMZM2G064679 // GRMZM2G019799 // GRMZM2G405581 // GRMZM2G034243 // GRMZM2G083526 //…
GO:0016192	P	vesicle-mediated transport	9	751	397	39203	0.36	1	// GRMZM2G139624 // GRMZM2G330772 // GRMZM5G830776 // GRMZM2G327680 // GRMZM2G055450 // GRMZM2G050556 // GRMZM2G021378 // GRMZM2G311328 // GRMZM2G131525
GO:0065008	P	regulation of biological quality	29	751	2139	39203	0.98	1	// GRMZM2G009968 // GRMZM2G065635 // GRMZM2G024668 // GRMZM5G822426 // GRMZM2G102382 // GRMZM2G462140 // GRMZM2G029219 // GRMZM2G011592 // GRMZM2G134957 // GRMZM2G056600 // GRMZM2G132032 // GRMZM2G062357 // GRMZM2G357620 // GRMZM5G892522 // GRMZM2G008647 // GRMZM2G008859 // GRMZM2G012631 // GRMZM2G117746 // GRMZM2G318180 // GRMZM2G056014 // GRMZM2G025954 // GRMZM2G171383 // GRMZM2G150337 // GRMZM…
GO:0009605	P	response to external stimulus	11	751	405	39203	0.16	1	// GRMZM2G152891 // GRMZM2G423898 // GRMZM2G117707 // GRMZM2G003565 // GRMZM2G055575 // GRMZM2G345717 // GRMZM2G001160 // GRMZM2G150337 // GRMZM2G141810 // GRMZM2G035134 // GRMZM2G000236
GO:0019538	P	protein metabolic process	121	751	7175	39203	0.95	1	// GRMZM2G024668 // GRMZM2G468255 // GRMZM2G099909 // GRMZM2G135970 // GRMZM2G394122 // GRMZM2G416964 // GRMZM2G360677 // GRMZM2G033375 // GRMZM2G039934 // GRMZM2G316232 // GRMZM2G139900 // GRMZM2G155216 // GRMZM2G121309 // GRMZM2G121303 // GRMZM2G099231 // GRMZM2G035517 // GRMZM2G074085 // GRMZM2G310410 // GRMZM2G117250 // GRMZM2G176225 // GRMZM2G112165 // AC203985.4_FG005 // GRMZM2G303768 // GR…
GO:0016052	P	carbohydrate catabolic process	9	751	408	39203	0.38	1	// GRMZM2G009282 // GRMZM5G891282 // GRMZM2G413647 // GRMZM5G833389 // GRMZM2G064302 // GRMZM2G005633 // GRMZM2G003385 // GRMZM2G123371 // GRMZM2G091228
GO:0016567	P	protein ubiquitination	5	751	139	39203	0.14	1	// GRMZM2G046848 // GRMZM2G156517 // GRMZM2G492252 // GRMZM2G018059 // GRMZM2G127690
GO:0033554	P	cellular response to stress	9	751	314	39203	0.16	1	// GRMZM2G421541 // GRMZM2G055575 // GRMZM2G096585 // GRMZM2G001160 // GRMZM2G040638 // AC197146.3_FG002 // GRMZM2G035134 // GRMZM2G091228 // GRMZM2G348956
GO:0071103	P	DNA conformation change	9	751	428	39203	0.44	1	// GRMZM2G332838 // GRMZM2G077991 // GRMZM2G112912 // GRMZM2G448458 // GRMZM2G119071 // GRMZM2G106133 // GRMZM2G072855 // GRMZM2G063896 // AC233865.1_FG001
GO:0033036	P	macromolecule localization	22	751	997	39203	0.28	1	// GRMZM2G046885 // GRMZM2G157157 // GRMZM2G107839 // GRMZM2G139624 // GRMZM2G156174 // GRMZM2G407825 // GRMZM2G093595 // GRMZM2G109526 // GRMZM2G021378 // GRMZM2G091228 // GRMZM2G069005 // GRMZM2G086971 // GRMZM2G436429 // GRMZM2G339503 // GRMZM2G008859 // GRMZM5G801241 // GRMZM2G311328 // GRMZM2G131525 // GRMZM2G330772 // GRMZM2G327680 // GRMZM2G085941 // GRMZM5G828302
GO:0022607	P	cellular component assembly	17	751	909	39203	0.57	1	// AC233865.1_FG001 // GRMZM2G077942 // GRMZM2G077991 // GRMZM2G055450 // GRMZM2G112912 // GRMZM2G448458 // GRMZM2G063896 // GRMZM2G119071 // GRMZM5G830329 // GRMZM2G332838 // GRMZM2G106133 // GRMZM2G145085 // GRMZM2G035134 // GRMZM2G072855 // GRMZM2G175562 // GRMZM2G050556 // GRMZM2G071264
GO:0034645	P	cellular macromolecule biosynthetic process	102	751	6057	39203	0.93	1	// GRMZM2G125653 // GRMZM2G003514 // GRMZM2G167018 // GRMZM2G455243 // GRMZM2G360677 // GRMZM2G316232 // GRMZM2G139900 // AC213600.3_FG002 // GRMZM2G092137 // GRMZM2G097059 // GRMZM2G313737 // GRMZM2G074085 // GRMZM2G026157 // GRMZM2G171181 // GRMZM2G093574 // GRMZM2G169149 // GRMZM2G394122 // GRMZM5G835323 // GRMZM2G072115 // GRMZM2G176506 // GRMZM2G176774 // GRMZM2G059562 // GRMZM2G032564 // GR…
GO:0006807	P	nitrogen compound metabolic process	120	751	6937	39203	0.9	1	// GRMZM2G413647 // GRMZM2G125653 // GRMZM2G003514 // GRMZM2G167018 // GRMZM2G455243 // GRMZM2G005633 // GRMZM2G061783 // GRMZM2G316232 // GRMZM2G119150 // GRMZM2G113408 // GRMZM2G092137 // GRMZM2G120652 // GRMZM2G097059 // GRMZM2G313737 // GRMZM2G117707 // GRMZM2G445057 // GRMZM2G026157 // GRMZM2G452178 // GRMZM2G169149 // GRMZM2G072115 // GRMZM2G174675 // GRMZM2G057386 // GRMZM2G059562 // GRMZM…
GO:0023033	P	signaling pathway	5	751	849	39203	1	1	// GRMZM2G035465 // GRMZM2G150337 // GRMZM2G121309 // GRMZM2G702026 // GRMZM2G382537
GO:0044267	P	cellular protein metabolic process	105	751	5860	39203	0.78	1	// GRMZM2G024668 // GRMZM2G099909 // GRMZM2G394122 // GRMZM2G416964 // GRMZM2G360677 // GRMZM2G033375 // GRMZM2G039934 // GRMZM2G316232 // GRMZM2G139900 // AC213600.3_FG002 // GRMZM2G121309 // GRMZM2G121303 // GRMZM2G099231 // GRMZM2G074085 // GRMZM2G171181 // GRMZM2G117250 // GRMZM2G176225 // GRMZM2G112165 // AC203985.4_FG005 // GRMZM2G303768 // GRMZM5G852177 // GRMZM2G168416 // GRMZM5G835323 //…
GO:0051186	P	cofactor metabolic process	12	751	461	39203	0.18	1	// GRMZM2G106376 // GRMZM2G099729 // GRMZM2G413647 // GRMZM2G091837 // GRMZM2G036759 // GRMZM2G046583 // GRMZM2G074857 // GRMZM2G033515 // GRMZM5G891282 // GRMZM2G120652 // GRMZM2G031825 // GRMZM2G074122
GO:0044260	P	cellular macromolecule metabolic process	186	751	11296	39203	0.99	1	// GRMZM2G413647 // GRMZM2G125653 // GRMZM2G003514 // GRMZM2G024668 // GRMZM2G167018 // GRMZM2G455243 // GRMZM2G099909 // GRMZM2G061783 // GRMZM2G394122 // GRMZM2G416964 // GRMZM2G360677 // GRMZM2G033375 // GRMZM2G039934 // GRMZM2G316232 // GRMZM2G139900 // GRMZM2G388684 // GRMZM2G155216 // GRMZM2G092137 // GRMZM2G121303 // GRMZM2G099231 // GRMZM2G097059 // GRMZM2G313737 // GRMZM2G074085 // GRMZM…
GO:0006886	P	intracellular protein transport	12	751	554	39203	0.38	1	// GRMZM2G046885 // GRMZM2G330772 // GRMZM2G157157 // GRMZM2G139624 // GRMZM2G327680 // GRMZM2G156174 // GRMZM5G828302 // GRMZM2G339503 // GRMZM2G008859 // GRMZM2G021378 // GRMZM2G311328 // GRMZM2G131525
GO:0051188	P	cofactor biosynthetic process	6	751	324	39203	0.59	1	// GRMZM2G106376 // GRMZM2G099729 // GRMZM2G046583 // GRMZM2G074857 // GRMZM2G120652 // GRMZM2G031825
GO:0065003	P	macromolecular complex assembly	15	751	882	39203	0.71	1	// GRMZM2G077942 // GRMZM2G077991 // GRMZM2G055450 // GRMZM2G112912 // GRMZM2G448458 // GRMZM2G119071 // GRMZM2G063896 // GRMZM2G332838 // GRMZM2G106133 // GRMZM2G145085 // GRMZM2G035134 // GRMZM2G072855 // GRMZM2G175562 // GRMZM2G050556 // AC233865.1_FG001
GO:0065007	P	biological regulation	112	751	6272	39203	0.8	1	// GRMZM2G125653 // GRMZM2G003514 // GRMZM2G024668 // GRMZM2G167018 // GRMZM2G316232 // GRMZM2G119150 // GRMZM2G074857 // GRMZM2G121309 // GRMZM2G097059 // GRMZM2G313737 // GRMZM2G026157 // GRMZM2G003565 // GRMZM5G892522 // GRMZM2G169149 // GRMZM2G056014 // GRMZM5G835323 // GRMZM2G152929 // GRMZM2G057386 // GRMZM2G059562 // GRMZM2G010046 // GRMZM2G145085 // GRMZM2G303044 // GRMZM2G125552 // GRMZM…
GO:0065004	P	protein-DNA complex assembly	9	751	322	39203	0.17	1	// GRMZM2G332838 // GRMZM2G077991 // GRMZM2G112912 // GRMZM2G448458 // GRMZM2G119071 // GRMZM2G106133 // GRMZM2G072855 // GRMZM2G063896 // AC233865.1_FG001
GO:0018130	P	heterocycle biosynthetic process	6	751	196	39203	0.18	1	// GRMZM2G106376 // GRMZM2G147955 // GRMZM2G375504 // GRMZM2G323719 // GRMZM2G061777 // GRMZM2G478568
GO:0016265	P	death	6	751	201	39203	0.2	1	// GRMZM2G066326 // GRMZM5G865943 // GRMZM5G891282 // AC197146.3_FG002 // GRMZM2G085941 // GRMZM2G357620
GO:0009308	P	amine metabolic process	22	751	994	39203	0.28	1	// GRMZM2G375504 // GRMZM2G323719 // GRMZM2G135970 // GRMZM2G104546 // GRMZM2G005633 // GRMZM5G865943 // GRMZM2G034152 // GRMZM2G119150 // GRMZM2G150014 // GRMZM2G061135 // GRMZM2G145204 // GRMZM2G313272 // GRMZM2G120652 // GRMZM2G143357 // GRMZM2G478568 // GRMZM2G147884 // GRMZM2G000052 // GRMZM2G383088 // GRMZM2G117707 // AC203752.5_FG002 // GRMZM2G152888 // GRMZM2G061777
GO:0006812	P	cation transport	24	751	924	39203	0.089	1	// GRMZM2G131575 // GRMZM2G008290 // GRMZM2G011592 // GRMZM2G102786 // GRMZM2G407825 // GRMZM2G113408 // GRMZM2G357620 // GRMZM2G478568 // GRMZM2G383088 // GRMZM2G104730 // GRMZM2G043932 // GRMZM2G017894 // GRMZM2G008859 // GRMZM2G006977 // GRMZM2G056014 // GRMZM2G150337 // GRMZM2G144420 // GRMZM2G017365 // GRMZM2G055575 // GRMZM2G090149 // GRMZM2G036908 // GRMZM2G028432 // GRMZM2G123486 // GRMZM…
GO:0006811	P	ion transport	27	751	1096	39203	0.12	1	// GRMZM2G025387 // GRMZM2G131575 // GRMZM2G008290 // GRMZM2G086496 // GRMZM2G011592 // GRMZM2G102786 // GRMZM2G407825 // GRMZM2G113408 // GRMZM2G091228 // GRMZM2G357620 // GRMZM2G478568 // GRMZM2G383088 // GRMZM2G104730 // GRMZM2G043932 // GRMZM2G017894 // GRMZM2G008859 // GRMZM2G006977 // GRMZM2G056014 // GRMZM2G150337 // GRMZM2G144420 // GRMZM2G017365 // GRMZM2G055575 // GRMZM2G090149 // GRMZM…
GO:0009889	P	regulation of biosynthetic process	53	751	3393	39203	0.95	1	// GRMZM2G046885 // GRMZM2G138455 // GRMZM2G125653 // GRMZM2G003514 // GRMZM2G093595 // GRMZM2G167018 // GRMZM2G125243 // GRMZM2G521481 // GRMZM2G035465 // GRMZM2G148056 // GRMZM2G104074 // GRMZM2G098474 // GRMZM2G123140 // GRMZM2G009530 // GRMZM2G044576 // GRMZM2G361376 // GRMZM2G702026 // GRMZM2G079470 // GRMZM2G094081 // GRMZM2G167576 // GRMZM2G120320 // GRMZM2G035890 // GRMZM2G106133 // GRMZM…
GO:0050794	P	regulation of cellular process	92	751	4274	39203	0.13	1	// GRMZM2G125653 // GRMZM2G003514 // GRMZM2G167018 // GRMZM2G316232 // GRMZM2G119150 // GRMZM2G121309 // GRMZM2G097059 // GRMZM2G313737 // GRMZM2G026157 // GRMZM2G452178 // GRMZM5G892522 // GRMZM2G130374 // GRMZM5G835323 // GRMZM2G152929 // GRMZM2G176506 // GRMZM2G059562 // GRMZM2G010046 // GRMZM2G357620 // GRMZM2G303044 // GRMZM2G057386 // GRMZM2G009968 // GRMZM2G092137 // GRMZM2G521481 // GRMZM…
GO:0043412	P	macromolecule modification	51	751	3252	39203	0.94	1	// GRMZM2G025387 // GRMZM2G114899 // GRMZM2G107645 // GRMZM2G018059 // GRMZM2G032104 // GRMZM2G046848 // GRMZM2G053722 // GRMZM2G176225 // GRMZM2G084806 // GRMZM2G461278 // GRMZM2G039934 // GRMZM2G024834 // GRMZM2G492252 // GRMZM2G044096 // GRMZM2G072658 // GRMZM2G155216 // GRMZM2G381076 // GRMZM2G050701 // GRMZM2G156517 // GRMZM2G164242 // GRMZM2G099231 // GRMZM2G016477 // GRMZM2G017164 // GRMZM…
GO:0008152	P	metabolic process	398	751	20231	39203	0.24	1	// GRMZM2G084515 // GRMZM2G003514 // AC234185.1_FG004 // GRMZM2G005633 // GRMZM2G360677 // GRMZM2G039385 // GRMZM2G139900 // GRMZM2G179981 // GRMZM2G074857 // GRMZM2G382537 // GRMZM2G031568 // GRMZM2G099231 // GRMZM2G097059 // GRMZM2G167018 // GRMZM5G873767 // GRMZM2G093574 // GRMZM2G112165 // GRMZM2G169149 // GRMZM2G009282 // GRMZM2G303768 // GRMZM2G168416 // GRMZM2G072115 // GRMZM2G176774 // GR…
GO:0009266	P	response to temperature stimulus	23	751	1765	39203	0.98	1	// GRMZM2G046885 // GRMZM2G099984 // GRMZM2G055575 // GRMZM2G134341 // GRMZM2G437100 // GRMZM2G415793 // GRMZM2G063850 // GRMZM2G033356 // GRMZM5G865943 // GRMZM2G061135 // GRMZM2G411159 // GRMZM2G024668 // GRMZM2G003385 // GRMZM2G158835 // GRMZM2G113033 // GRMZM2G112165 // GRMZM2G379898 // GRMZM2G012631 // GRMZM5G862101 // GRMZM2G096585 // GRMZM5G833389 // GRMZM2G001160 // GRMZM2G104626
GO:0006006	P	glucose metabolic process	8	751	418	39203	0.55	1	// GRMZM2G413647 // GRMZM5G833389 // GRMZM2G064302 // GRMZM5G891282 // GRMZM2G019986 // GRMZM2G003385 // GRMZM2G123371 // GRMZM2G032628
GO:0034613	P	cellular protein localization	12	751	562	39203	0.4	1	// GRMZM2G046885 // GRMZM2G330772 // GRMZM2G157157 // GRMZM2G139624 // GRMZM2G327680 // GRMZM2G156174 // GRMZM5G828302 // GRMZM2G339503 // GRMZM2G008859 // GRMZM2G021378 // GRMZM2G311328 // GRMZM2G131525
GO:0051603	P	proteolysis involved in cellular protein catabolic process	7	751	305	39203	0.37	1	// GRMZM2G055785 // GRMZM2G033375 // GRMZM5G894518 // GRMZM2G108739 // GRMZM2G156517 // GRMZM2G121303 // GRMZM2G416964
GO:0033692	P	cellular polysaccharide biosynthetic process	7	751	195	39203	0.088	1	// GRMZM2G113432 // GRMZM2G044744 // GRMZM2G086845 // GRMZM5G891282 // GRMZM2G103972 // GRMZM2G110145 // GRMZM2G032628
GO:0015980	P	energy derivation by oxidation of organic compounds	6	751	205	39203	0.21	1	// GRMZM2G031033 // GRMZM2G036759 // GRMZM2G033515 // GRMZM2G012119 // GRMZM2G074122 // GRMZM2G032628
GO:0046907	P	intracellular transport	13	751	661	39203	0.5	1	// GRMZM2G046885 // GRMZM2G330772 // GRMZM2G157157 // GRMZM2G139624 // GRMZM2G327680 // GRMZM2G156174 // GRMZM5G828302 // GRMZM2G339503 // GRMZM2G008859 // GRMZM2G021378 // GRMZM2G311328 // GRMZM2G131525 // GRMZM2G157317
GO:0006355	P	regulation of transcription, DNA-dependent	51	751	2208	39203	0.1	1	// GRMZM2G046885 // GRMZM2G138455 // GRMZM2G125653 // GRMZM2G003514 // GRMZM2G093595 // GRMZM2G167018 // GRMZM2G125243 // GRMZM2G521481 // GRMZM2G035465 // GRMZM2G148056 // GRMZM2G104074 // GRMZM2G098474 // GRMZM2G123140 // GRMZM2G009530 // GRMZM2G044576 // GRMZM2G361376 // GRMZM2G702026 // GRMZM2G079470 // GRMZM2G094081 // GRMZM2G167576 // GRMZM2G120320 // GRMZM2G106133 // GRMZM2G056600 // GRMZM…
GO:0009059	P	macromolecule biosynthetic process	103	751	6064	39203	0.92	1	// GRMZM2G125653 // GRMZM2G003514 // GRMZM2G167018 // GRMZM2G455243 // GRMZM2G360677 // GRMZM2G316232 // GRMZM2G139900 // AC213600.3_FG002 // GRMZM2G092137 // GRMZM2G097059 // GRMZM2G313737 // GRMZM2G074085 // GRMZM2G026157 // GRMZM2G171181 // GRMZM2G093574 // GRMZM2G169149 // GRMZM2G394122 // GRMZM5G835323 // GRMZM2G072115 // GRMZM2G176506 // GRMZM2G176774 // GRMZM2G059562 // GRMZM2G032564 // GR…
GO:0006350	P	transcription	52	751	3730	39203	0.99	1	// GRMZM2G046885 // GRMZM2G138455 // GRMZM2G125653 // GRMZM2G003514 // GRMZM2G093595 // GRMZM2G167018 // GRMZM2G125243 // GRMZM2G521481 // GRMZM2G126936 // GRMZM2G035465 // GRMZM2G148056 // GRMZM2G104074 // GRMZM2G098474 // GRMZM2G123140 // GRMZM2G009530 // GRMZM2G044576 // GRMZM2G361376 // GRMZM2G702026 // GRMZM2G079470 // GRMZM2G094081 // GRMZM2G167576 // GRMZM2G120320 // GRMZM2G106133 // GRMZM…
GO:0006351	P	transcription, DNA-dependent	52	751	2362	39203	0.17	1	// GRMZM2G046885 // GRMZM2G138455 // GRMZM2G125653 // GRMZM2G003514 // GRMZM2G093595 // GRMZM2G167018 // GRMZM2G125243 // GRMZM2G521481 // GRMZM2G126936 // GRMZM2G035465 // GRMZM2G148056 // GRMZM2G104074 // GRMZM2G098474 // GRMZM2G123140 // GRMZM2G009530 // GRMZM2G044576 // GRMZM2G361376 // GRMZM2G702026 // GRMZM2G079470 // GRMZM2G094081 // GRMZM2G167576 // GRMZM2G120320 // GRMZM2G106133 // GRMZM…
GO:0045333	P	cellular respiration	5	751	159	39203	0.2	1	// GRMZM2G031033 // GRMZM2G012119 // GRMZM2G074122 // GRMZM2G033515 // GRMZM2G036759
GO:0051171	P	regulation of nitrogen compound metabolic process	51	751	3370	39203	0.97	1	// GRMZM2G046885 // GRMZM2G138455 // GRMZM2G125653 // GRMZM2G003514 // GRMZM2G093595 // GRMZM2G167018 // GRMZM2G125243 // GRMZM2G521481 // GRMZM2G035465 // GRMZM2G148056 // GRMZM2G104074 // GRMZM2G098474 // GRMZM2G123140 // GRMZM2G009530 // GRMZM2G044576 // GRMZM2G361376 // GRMZM2G702026 // GRMZM2G079470 // GRMZM2G094081 // GRMZM2G167576 // GRMZM2G120320 // GRMZM2G106133 // GRMZM2G056600 // GRMZM…
GO:0032774	P	RNA biosynthetic process	53	751	2364	39203	0.14	1	// GRMZM2G046885 // GRMZM2G138455 // GRMZM2G125653 // GRMZM2G003514 // GRMZM2G093595 // GRMZM2G167018 // GRMZM2G125243 // GRMZM2G521481 // GRMZM2G126936 // GRMZM2G035465 // GRMZM2G148056 // GRMZM2G104074 // GRMZM2G098474 // GRMZM2G123140 // GRMZM2G009530 // GRMZM2G044576 // GRMZM2G361376 // GRMZM2G702026 // GRMZM2G079470 // GRMZM2G094081 // GRMZM2G167576 // GRMZM2G120320 // GRMZM2G106133 // GRMZM…
GO:0019320	P	hexose catabolic process	6	751	318	39203	0.57	1	// GRMZM2G413647 // GRMZM5G833389 // GRMZM2G064302 // GRMZM5G891282 // GRMZM2G003385 // GRMZM2G123371
GO:0044249	P	cellular biosynthetic process	158	751	7619	39203	0.15	1	// GRMZM2G125653 // GRMZM2G003514 // GRMZM2G167018 // GRMZM2G455243 // GRMZM2G493395 // GRMZM2G364597 // GRMZM2G360677 // GRMZM2G039385 // GRMZM2G316232 // GRMZM2G139900 // GRMZM2G119150 // GRMZM2G113408 // GRMZM2G074857 // AC213600.3_FG002 // GRMZM2G350020 // GRMZM2G460864 // GRMZM2G120652 // GRMZM2G031568 // GRMZM5G830329 // GRMZM2G097059 // GRMZM2G313737 // GRMZM2G074085 // GRMZM2G117707 // AC…
GO:0034641	P	cellular nitrogen compound metabolic process	28	751	1150	39203	0.12	1	// GRMZM2G413647 // GRMZM2G091837 // GRMZM2G147955 // GRMZM2G106376 // GRMZM2G375504 // GRMZM2G323719 // GRMZM2G104546 // GRMZM2G135970 // GRMZM2G103152 // GRMZM2G341723 // GRMZM5G865943 // GRMZM2G034152 // GRMZM2G119150 // GRMZM2G150014 // GRMZM2G061135 // GRMZM2G313272 // GRMZM2G120652 // GRMZM2G143357 // GRMZM2G478568 // GRMZM2G000052 // GRMZM2G383088 // GRMZM2G117707 // GRMZM5G891282 // GRMZM…
GO:0031497	P	chromatin assembly	9	751	322	39203	0.17	1	// GRMZM2G332838 // GRMZM2G077991 // GRMZM2G112912 // GRMZM2G448458 // GRMZM2G119071 // GRMZM2G106133 // GRMZM2G072855 // GRMZM2G063896 // AC233865.1_FG001
GO:0034621	P	cellular macromolecular complex subunit organization	14	751	600	39203	0.27	1	// GRMZM2G452026 // GRMZM2G077942 // GRMZM2G077991 // GRMZM2G055450 // GRMZM2G112912 // GRMZM2G448458 // GRMZM2G119071 // GRMZM2G063896 // GRMZM2G332838 // GRMZM2G106133 // GRMZM2G072855 // GRMZM2G175562 // GRMZM2G050556 // AC233865.1_FG001
GO:0006139	P	nucleobase, nucleoside, nucleotide and nucleic acid metabolic process	94	751	5979	39203	0.98	1	// GRMZM2G413647 // GRMZM2G125653 // GRMZM2G003514 // GRMZM2G167018 // GRMZM2G455243 // GRMZM2G061783 // GRMZM2G316232 // GRMZM5G843537 // GRMZM2G092137 // GRMZM2G097059 // GRMZM2G313737 // GRMZM2G445057 // GRMZM2G026157 // GRMZM2G452178 // GRMZM2G169149 // GRMZM2G072115 // GRMZM2G174675 // GRMZM2G057386 // GRMZM2G059562 // GRMZM2G149865 // GRMZM5G880069 // GRMZM2G176506 // GRMZM2G348956 // GRMZM…
GO:0051234	P	establishment of localization	83	751	3841	39203	0.14	1	// GRMZM2G046885 // GRMZM2G025387 // GRMZM2G017365 // GRMZM2G157157 // GRMZM2G090149 // GRMZM2G136508 // GRMZM2G107839 // GRMZM2G073954 // GRMZM2G120563 // GRMZM2G131575 // GRMZM2G339503 // GRMZM5G828302 // GRMZM2G008290 // GRMZM2G040309 // GRMZM2G008859 // GRMZM2G086496 // GRMZM2G033359 // GRMZM2G006977 // GRMZM2G029219 // GRMZM5G812538 // GRMZM2G174458 // GRMZM5G843537 // GRMZM2G169363 // GRMZM…
GO:0051649	P	establishment of localization in cell	16	751	791	39203	0.45	1	// GRMZM2G046885 // GRMZM2G139624 // GRMZM2G157157 // GRMZM2G327680 // GRMZM2G156174 // GRMZM2G033359 // GRMZM5G828302 // GRMZM5G830776 // GRMZM2G436429 // GRMZM2G339503 // GRMZM2G008859 // GRMZM2G157317 // GRMZM2G021378 // GRMZM2G311328 // GRMZM2G131525 // GRMZM2G330772
GO:0051246	P	regulation of protein metabolic process	6	751	225	39203	0.27	1	// GRMZM5G835323 // GRMZM2G035890 // GRMZM2G121309 // GRMZM2G035465 // GRMZM2G053722 // GRMZM2G175562
GO:0051641	P	cellular localization	17	751	817	39203	0.4	1	// GRMZM2G046885 // GRMZM2G139624 // GRMZM2G157157 // GRMZM2G327680 // GRMZM2G311328 // GRMZM2G156174 // GRMZM2G033359 // GRMZM5G828302 // GRMZM5G830776 // GRMZM2G436429 // GRMZM2G339503 // GRMZM2G008859 // GRMZM2G157317 // GRMZM2G021378 // GRMZM2G091228 // GRMZM2G131525 // GRMZM2G330772
GO:0009057	P	macromolecule catabolic process	17	751	776	39203	0.32	1	// GRMZM2G121303 // GRMZM2G055785 // GRMZM2G009282 // GRMZM2G033375 // GRMZM2G413647 // GRMZM2G091837 // GRMZM5G894518 // GRMZM5G833389 // GRMZM5G891282 // GRMZM2G064302 // GRMZM2G005633 // GRMZM2G108739 // GRMZM2G003385 // GRMZM2G156517 // GRMZM2G123371 // GRMZM2G091228 // GRMZM2G416964
GO:0046365	P	monosaccharide catabolic process	6	751	318	39203	0.57	1	// GRMZM2G413647 // GRMZM5G833389 // GRMZM2G064302 // GRMZM5G891282 // GRMZM2G003385 // GRMZM2G123371
GO:0019318	P	hexose metabolic process	9	751	457	39203	0.51	1	// GRMZM5G898915 // GRMZM2G413647 // GRMZM5G833389 // GRMZM2G064302 // GRMZM5G891282 // GRMZM2G019986 // GRMZM2G003385 // GRMZM2G123371 // GRMZM2G032628
GO:0008652	P	cellular amino acid biosynthetic process	10	751	324	39203	0.1	1	// GRMZM2G117707 // GRMZM2G104546 // GRMZM2G119150 // GRMZM2G150014 // GRMZM2G061135 // GRMZM2G323719 // GRMZM2G061777 // GRMZM2G313272 // GRMZM2G143357 // GRMZM2G375504
GO:0006810	P	transport	83	751	3841	39203	0.14	1	// GRMZM2G046885 // GRMZM2G025387 // GRMZM2G017365 // GRMZM2G157157 // GRMZM2G090149 // GRMZM2G136508 // GRMZM2G107839 // GRMZM2G073954 // GRMZM2G120563 // GRMZM2G131575 // GRMZM2G339503 // GRMZM5G828302 // GRMZM2G008290 // GRMZM2G040309 // GRMZM2G008859 // GRMZM2G086496 // GRMZM2G033359 // GRMZM2G006977 // GRMZM2G029219 // GRMZM5G812538 // GRMZM2G174458 // GRMZM5G843537 // GRMZM2G169363 // GRMZM…
GO:0006508	P	proteolysis	23	751	1613	39203	0.94	1	// GRMZM2G152419 // GRMZM2G468255 // GRMZM2G382581 // GRMZM2G135970 // GRMZM2G108849 // GRMZM2G416964 // GRMZM2G066326 // GRMZM2G411333 // GRMZM2G165969 // GRMZM2G059026 // GRMZM2G033375 // GRMZM2G320206 // GRMZM2G070455 // GRMZM2G132032 // GRMZM2G121303 // GRMZM2G035517 // GRMZM2G081504 // GRMZM2G156517 // GRMZM2G133919 // GRMZM2G055785 // GRMZM2G025491 // GRMZM5G894518 // GRMZM2G108739
GO:0015672	P	monovalent inorganic cation transport	7	751	532	39203	0.88	1	// GRMZM2G011592 // GRMZM2G383088 // GRMZM2G055575 // GRMZM2G131575 // GRMZM2G090149 // GRMZM2G113408 // GRMZM2G028432
GO:0016070	P	RNA metabolic process	62	751	3121	39203	0.4	1	// GRMZM2G046885 // GRMZM2G138455 // GRMZM2G125653 // GRMZM2G003514 // GRMZM2G093595 // GRMZM2G167018 // GRMZM2G125243 // GRMZM2G521481 // GRMZM2G126936 // GRMZM2G035465 // GRMZM2G061783 // GRMZM2G148056 // GRMZM2G149865 // GRMZM2G104074 // GRMZM2G098474 // GRMZM2G123140 // GRMZM2G032104 // GRMZM2G009530 // GRMZM2G044576 // GRMZM2G361376 // GRMZM2G702026 // GRMZM2G079470 // GRMZM2G094081 // GRMZM…
GO:0044238	P	primary metabolic process	295	751	15885	39203	0.76	1	// GRMZM2G084515 // GRMZM2G413647 // GRMZM5G843537 // GRMZM2G003514 // GRMZM2G024668 // GRMZM2G128248 // GRMZM2G167018 // GRMZM2G468255 // GRMZM2G455243 // GRMZM2G099909 // GRMZM2G493395 // GRMZM2G361842 // GRMZM2G135970 // GRMZM2G061783 // GRMZM2G101000 // GRMZM2G394122 // GRMZM2G416964 // GRMZM2G360677 // GRMZM2G039385 // GRMZM2G104074 // GRMZM2G130528 // GRMZM2G033375 // GRMZM2G039934 // GRMZM…
GO:0045184	P	establishment of protein localization	17	751	864	39203	0.49	1	// GRMZM2G046885 // GRMZM2G139624 // GRMZM2G157157 // GRMZM2G327680 // GRMZM2G156174 // GRMZM5G828302 // GRMZM2G109526 // GRMZM2G069005 // GRMZM2G086971 // GRMZM2G436429 // GRMZM2G339503 // GRMZM2G008859 // GRMZM5G801241 // GRMZM2G021378 // GRMZM2G311328 // GRMZM2G131525 // GRMZM2G330772
GO:0043687	P	post-translational protein modification	46	751	2929	39203	0.93	1	// GRMZM2G025387 // GRMZM2G492252 // GRMZM2G107645 // GRMZM2G018059 // GRMZM2G149051 // GRMZM2G046848 // GRMZM2G053722 // GRMZM2G176225 // GRMZM2G084806 // GRMZM2G461278 // GRMZM2G039934 // GRMZM2G024834 // GRMZM2G072658 // GRMZM2G155216 // GRMZM2G381076 // GRMZM2G050701 // GRMZM2G156517 // GRMZM2G164242 // GRMZM2G099231 // GRMZM2G016477 // GRMZM2G017164 // GRMZM2G001956 // GRMZM2G127690 // GRMZM…
GO:0006725	P	cellular aromatic compound metabolic process	9	751	410	39203	0.39	1	// GRMZM2G106376 // GRMZM2G117707 // GRMZM2G345717 // GRMZM2G061135 // GRMZM2G091228 // GRMZM2G141810 // GRMZM2G085941 // GRMZM5G830329 // GRMZM2G350020
GO:0044275	P	cellular carbohydrate catabolic process	7	751	332	39203	0.45	1	// GRMZM2G413647 // GRMZM5G833389 // GRMZM2G064302 // GRMZM5G891282 // GRMZM2G003385 // GRMZM2G123371 // GRMZM2G091228
GO:0044257	P	cellular protein catabolic process	8	751	305	39203	0.24	1	// GRMZM2G055785 // GRMZM2G033375 // GRMZM2G091837 // GRMZM5G894518 // GRMZM2G108739 // GRMZM2G156517 // GRMZM2G121303 // GRMZM2G416964
GO:0005996	P	monosaccharide metabolic process	13	751	497	39203	0.17	1	// GRMZM5G898915 // GRMZM2G086845 // GRMZM2G413647 // GRMZM2G174675 // GRMZM5G833389 // GRMZM2G064302 // GRMZM5G891282 // GRMZM2G019986 // GRMZM2G141510 // GRMZM2G003385 // GRMZM2G123371 // GRMZM2G032628 // GRMZM2G011624
GO:0006334	P	nucleosome assembly	9	751	322	39203	0.17	1	// GRMZM2G332838 // GRMZM2G077991 // GRMZM2G112912 // GRMZM2G448458 // GRMZM2G119071 // GRMZM2G106133 // GRMZM2G072855 // GRMZM2G063896 // AC233865.1_FG001
GO:0051252	P	regulation of RNA metabolic process	51	751	2211	39203	0.1	1	// GRMZM2G046885 // GRMZM2G138455 // GRMZM2G125653 // GRMZM2G003514 // GRMZM2G093595 // GRMZM2G167018 // GRMZM2G125243 // GRMZM2G521481 // GRMZM2G035465 // GRMZM2G148056 // GRMZM2G104074 // GRMZM2G098474 // GRMZM2G123140 // GRMZM2G009530 // GRMZM2G044576 // GRMZM2G361376 // GRMZM2G702026 // GRMZM2G079470 // GRMZM2G094081 // GRMZM2G167576 // GRMZM2G120320 // GRMZM2G106133 // GRMZM2G056600 // GRMZM…
GO:0006333	P	chromatin assembly or disassembly	9	751	372	39203	0.29	1	// GRMZM2G332838 // GRMZM2G077991 // GRMZM2G112912 // GRMZM2G448458 // GRMZM2G119071 // GRMZM2G106133 // GRMZM2G072855 // GRMZM2G063896 // AC233865.1_FG001
GO:0043170	P	macromolecule metabolic process	205	751	12696	39203	1	1	// GRMZM2G413647 // GRMZM2G125653 // GRMZM2G003514 // GRMZM2G024668 // GRMZM2G128248 // GRMZM2G167018 // GRMZM2G468255 // GRMZM2G455243 // GRMZM2G099909 // GRMZM2G135970 // GRMZM2G061783 // GRMZM2G394122 // GRMZM2G416964 // GRMZM2G360677 // GRMZM2G104074 // GRMZM2G033375 // GRMZM2G039934 // GRMZM2G316232 // GRMZM2G139900 // GRMZM2G388684 // GRMZM2G155216 // GRMZM2G092137 // GRMZM2G121303 // GRMZM…
GO:0006007	P	glucose catabolic process	6	751	318	39203	0.57	1	// GRMZM2G413647 // GRMZM5G833389 // GRMZM2G064302 // GRMZM5G891282 // GRMZM2G003385 // GRMZM2G123371
GO:0044106	P	cellular amine metabolic process	18	751	898	39203	0.46	1	// GRMZM2G000052 // GRMZM2G383088 // GRMZM5G865943 // GRMZM2G034152 // GRMZM2G104546 // GRMZM2G119150 // GRMZM2G150014 // GRMZM2G061135 // GRMZM2G323719 // GRMZM2G117707 // GRMZM2G061777 // GRMZM2G313272 // GRMZM2G135970 // GRMZM2G120652 // AC203752.5_FG002 // GRMZM2G375504 // GRMZM2G143357 // GRMZM2G478568
GO:0043933	P	macromolecular complex subunit organization	16	751	929	39203	0.7	1	// GRMZM2G452026 // GRMZM2G077942 // GRMZM2G077991 // GRMZM2G055450 // GRMZM2G112912 // GRMZM2G448458 // GRMZM2G119071 // GRMZM2G063896 // GRMZM2G332838 // GRMZM2G106133 // GRMZM2G145085 // GRMZM2G035134 // GRMZM2G072855 // GRMZM2G175562 // GRMZM2G050556 // AC233865.1_FG001
GO:0031326	P	regulation of cellular biosynthetic process	53	751	3393	39203	0.95	1	// GRMZM2G046885 // GRMZM2G138455 // GRMZM2G125653 // GRMZM2G003514 // GRMZM2G093595 // GRMZM2G167018 // GRMZM2G125243 // GRMZM2G521481 // GRMZM2G035465 // GRMZM2G148056 // GRMZM2G104074 // GRMZM2G098474 // GRMZM2G123140 // GRMZM2G009530 // GRMZM2G044576 // GRMZM2G361376 // GRMZM2G702026 // GRMZM2G079470 // GRMZM2G094081 // GRMZM2G167576 // GRMZM2G120320 // GRMZM2G035890 // GRMZM2G106133 // GRMZM…
GO:0031323	P	regulation of cellular metabolic process	59	751	3439	39203	0.83	1	// GRMZM2G046885 // GRMZM2G138455 // GRMZM2G125653 // GRMZM2G003514 // GRMZM2G121309 // GRMZM2G167018 // GRMZM2G125243 // GRMZM2G521481 // GRMZM2G035465 // GRMZM2G053722 // GRMZM2G148056 // GRMZM2G104074 // GRMZM2G098474 // GRMZM2G123140 // GRMZM2G009530 // GRMZM2G044576 // GRMZM2G176506 // GRMZM2G361376 // GRMZM2G702026 // GRMZM2G079470 // GRMZM2G094081 // GRMZM2G167576 // GRMZM2G120320 // GRMZM…
GO:0042592	P	homeostatic process	18	751	2047	39203	1	1	// GRMZM2G011592 // GRMZM2G056014 // GRMZM2G318180 // GRMZM2G008647 // GRMZM2G009968 // GRMZM2G025954 // GRMZM2G173978 // GRMZM5G825090 // GRMZM2G150337 // GRMZM2G134957 // GRMZM5G892522 // GRMZM2G029219 // GRMZM5G822426 // GRMZM2G102382 // GRMZM2G008859 // GRMZM2G462140 // GRMZM2G303044 // GRMZM2G357620
GO:0045449	P	regulation of transcription	51	751	3352	39203	0.97	1	// GRMZM2G046885 // GRMZM2G138455 // GRMZM2G125653 // GRMZM2G003514 // GRMZM2G093595 // GRMZM2G167018 // GRMZM2G125243 // GRMZM2G521481 // GRMZM2G035465 // GRMZM2G148056 // GRMZM2G104074 // GRMZM2G098474 // GRMZM2G123140 // GRMZM2G009530 // GRMZM2G044576 // GRMZM2G361376 // GRMZM2G702026 // GRMZM2G079470 // GRMZM2G094081 // GRMZM2G167576 // GRMZM2G120320 // GRMZM2G106133 // GRMZM2G056600 // GRMZM…
GO:0015031	P	protein transport	17	751	864	39203	0.49	1	// GRMZM2G046885 // GRMZM2G139624 // GRMZM2G157157 // GRMZM2G327680 // GRMZM2G156174 // GRMZM5G828302 // GRMZM2G109526 // GRMZM2G069005 // GRMZM2G086971 // GRMZM2G436429 // GRMZM2G339503 // GRMZM2G008859 // GRMZM5G801241 // GRMZM2G021378 // GRMZM2G311328 // GRMZM2G131525 // GRMZM2G330772
GO:0034622	P	cellular macromolecular complex assembly	13	751	553	39203	0.27	1	// GRMZM2G077942 // GRMZM2G077991 // GRMZM2G055450 // GRMZM2G112912 // GRMZM2G448458 // GRMZM2G119071 // GRMZM2G063896 // GRMZM2G332838 // GRMZM2G106133 // GRMZM2G072855 // GRMZM2G175562 // GRMZM2G050556 // AC233865.1_FG001
GO:0043632	P	modification-dependent macromolecule catabolic process	7	751	256	39203	0.23	1	// GRMZM2G055785 // GRMZM2G033375 // GRMZM5G894518 // GRMZM2G108739 // GRMZM2G156517 // GRMZM2G121303 // GRMZM2G416964
GO:0008219	P	cell death	6	751	201	39203	0.2	1	// GRMZM2G066326 // GRMZM5G865943 // GRMZM5G891282 // AC197146.3_FG002 // GRMZM2G085941 // GRMZM2G357620
GO:0023052	P	signaling	32	751	1673	39203	0.53	1	// GRMZM2G025387 // GRMZM2G065635 // GRMZM2G119150 // GRMZM2G035465 // GRMZM2G152891 // GRMZM2G098474 // GRMZM5G865943 // GRMZM2G702026 // GRMZM2G340359 // GRMZM2G056600 // GRMZM2G382537 // GRMZM2G148056 // GRMZM2G176495 // GRMZM2G117250 // GRMZM2G086971 // GRMZM2G318180 // GRMZM2G409974 // GRMZM2G166297 // GRMZM2G422340 // GRMZM2G152929 // GRMZM2G093595 // GRMZM2G010046 // GRMZM2G121309 // GRMZM…
GO:0006325	P	chromatin organization	10	751	436	39203	0.33	1	// GRMZM2G107645 // GRMZM2G077991 // GRMZM2G112912 // GRMZM2G448458 // GRMZM2G119071 // GRMZM2G332838 // GRMZM2G106133 // GRMZM2G072855 // GRMZM2G063896 // AC233865.1_FG001
GO:0044265	P	cellular macromolecule catabolic process	15	751	653	39203	0.28	1	// GRMZM2G055785 // GRMZM2G033375 // GRMZM2G413647 // GRMZM2G091837 // GRMZM5G894518 // GRMZM5G833389 // GRMZM2G121303 // GRMZM2G064302 // GRMZM5G891282 // GRMZM2G108739 // GRMZM2G003385 // GRMZM2G156517 // GRMZM2G123371 // GRMZM2G091228 // GRMZM2G416964
GO:0006520	P	cellular amino acid metabolic process	14	751	849	39203	0.75	1	// GRMZM2G383088 // GRMZM2G117707 // GRMZM2G104546 // GRMZM2G119150 // GRMZM2G150014 // GRMZM2G061135 // GRMZM2G323719 // GRMZM2G061777 // GRMZM2G313272 // GRMZM2G135970 // GRMZM2G120652 // AC203752.5_FG002 // GRMZM2G375504 // GRMZM2G143357
GO:0006323	P	DNA packaging	9	751	323	39203	0.18	1	// GRMZM2G332838 // GRMZM2G077991 // GRMZM2G112912 // GRMZM2G448458 // GRMZM2G119071 // GRMZM2G106133 // GRMZM2G072855 // GRMZM2G063896 // AC233865.1_FG001
GO:0071554	P	cell wall organization or biogenesis	5	751	270	39203	0.59	1	// GRMZM2G005633 // GRMZM2G480074 // GRMZM2G009282 // GRMZM2G091228 // GRMZM2G167497
GO:0010467	P	gene expression	97	751	6042	39203	0.98	1	// GRMZM2G125653 // GRMZM2G003514 // GRMZM2G024668 // GRMZM2G167018 // GRMZM2G061783 // GRMZM2G360677 // GRMZM2G316232 // GRMZM2G139900 // GRMZM2G092137 // GRMZM2G097059 // GRMZM2G313737 // GRMZM2G074085 // GRMZM2G445057 // GRMZM2G026157 // GRMZM2G171181 // GRMZM2G093574 // GRMZM2G169149 // GRMZM2G394122 // GRMZM5G835323 // GRMZM2G072115 // GRMZM2G176506 // GRMZM2G059562 // GRMZM2G149865 // GRMZM…
GO:0006511	P	ubiquitin-dependent protein catabolic process	7	751	256	39203	0.23	1	// GRMZM2G055785 // GRMZM2G033375 // GRMZM5G894518 // GRMZM2G108739 // GRMZM2G156517 // GRMZM2G121303 // GRMZM2G416964
GO:0070271	P	protein complex biogenesis	6	751	593	39203	0.97	1	// GRMZM2G077942 // GRMZM2G055450 // GRMZM2G050556 // GRMZM2G035134 // GRMZM2G175562 // GRMZM2G145085
GO:0010468	P	regulation of gene expression	56	751	3419	39203	0.9	1	// GRMZM2G046885 // GRMZM2G138455 // GRMZM2G125653 // GRMZM2G003514 // GRMZM2G024668 // GRMZM2G167018 // GRMZM2G125243 // GRMZM2G521481 // GRMZM2G035465 // GRMZM2G148056 // GRMZM2G104074 // GRMZM2G098474 // GRMZM2G123140 // GRMZM2G009530 // GRMZM2G044576 // GRMZM2G361376 // GRMZM2G702026 // GRMZM2G079470 // GRMZM2G094081 // GRMZM2G167576 // GRMZM2G120320 // GRMZM2G035890 // GRMZM2G106133 // GRMZM…
GO:0006468	P	protein amino acid phosphorylation	36	751	2387	39203	0.94	1	// GRMZM2G025387 // GRMZM2G107645 // GRMZM2G018059 // GRMZM2G149051 // GRMZM2G046848 // GRMZM2G053722 // GRMZM2G176225 // GRMZM2G084806 // GRMZM2G461278 // GRMZM2G039934 // GRMZM2G024834 // GRMZM2G072658 // GRMZM2G381076 // GRMZM2G050701 // GRMZM2G017164 // GRMZM2G164242 // GRMZM2G310410 // GRMZM2G117250 // GRMZM2G468756 // GRMZM2G023836 // GRMZM2G028037 // GRMZM2G153527 // GRMZM2G303768 // GRMZM…
GO:0046164	P	alcohol catabolic process	6	751	332	39203	0.61	1	// GRMZM2G413647 // GRMZM5G833389 // GRMZM2G064302 // GRMZM5G891282 // GRMZM2G003385 // GRMZM2G123371
GO:0019219	P	regulation of nucleobase, nucleoside, nucleotide and nucleic acid metabolic process	51	751	3370	39203	0.97	1	// GRMZM2G046885 // GRMZM2G138455 // GRMZM2G125653 // GRMZM2G003514 // GRMZM2G093595 // GRMZM2G167018 // GRMZM2G125243 // GRMZM2G521481 // GRMZM2G035465 // GRMZM2G148056 // GRMZM2G104074 // GRMZM2G098474 // GRMZM2G123140 // GRMZM2G009530 // GRMZM2G044576 // GRMZM2G361376 // GRMZM2G702026 // GRMZM2G079470 // GRMZM2G094081 // GRMZM2G167576 // GRMZM2G120320 // GRMZM2G106133 // GRMZM2G056600 // GRMZM…
GO:0019941	P	modification-dependent protein catabolic process	7	751	256	39203	0.23	1	// GRMZM2G055785 // GRMZM2G033375 // GRMZM5G894518 // GRMZM2G108739 // GRMZM2G156517 // GRMZM2G121303 // GRMZM2G416964
GO:0006461	P	protein complex assembly	6	751	593	39203	0.97	1	// GRMZM2G077942 // GRMZM2G055450 // GRMZM2G050556 // GRMZM2G035134 // GRMZM2G175562 // GRMZM2G145085
GO:0006464	P	protein modification process	49	751	3113	39203	0.94	1	// GRMZM2G025387 // GRMZM2G114899 // GRMZM2G107645 // GRMZM2G018059 // GRMZM2G149051 // GRMZM2G046848 // GRMZM2G053722 // GRMZM2G176225 // GRMZM2G084806 // GRMZM2G461278 // GRMZM2G039934 // GRMZM2G024834 // GRMZM2G492252 // GRMZM2G044096 // GRMZM2G072658 // GRMZM2G155216 // GRMZM2G381076 // GRMZM2G050701 // GRMZM2G156517 // GRMZM2G164242 // GRMZM2G099231 // GRMZM2G016477 // GRMZM2G017164 // GRMZM…
GO:0009058	P	biosynthetic process	165	751	7998	39203	0.16	1	// GRMZM2G084515 // GRMZM2G125653 // GRMZM2G003514 // GRMZM2G167018 // GRMZM2G455243 // GRMZM2G493395 // GRMZM2G364597 // GRMZM2G360677 // GRMZM2G039385 // GRMZM2G316232 // GRMZM2G139900 // GRMZM2G119150 // GRMZM2G113408 // GRMZM2G074857 // AC213600.3_FG002 // GRMZM2G350020 // GRMZM2G460864 // GRMZM2G120652 // GRMZM2G031568 // GRMZM5G830329 // GRMZM2G097059 // GRMZM2G313737 // GRMZM2G074085 // GR…
GO:0009116	P	nucleoside metabolic process	5	751	137	39203	0.13	1	// GRMZM5G833747 // GRMZM2G086714 // GRMZM2G152040 // GRMZM5G891282 // GRMZM2G061135
GO:0051179	P	localization	85	751	3887	39203	0.11	1	// GRMZM2G046885 // GRMZM2G025387 // GRMZM2G017365 // GRMZM2G157157 // GRMZM2G090149 // GRMZM2G136508 // GRMZM2G107839 // GRMZM2G073954 // GRMZM2G120563 // GRMZM2G131575 // GRMZM2G339503 // GRMZM5G828302 // GRMZM2G008290 // GRMZM2G040309 // GRMZM2G008859 // GRMZM2G086496 // GRMZM2G033359 // GRMZM2G006977 // GRMZM2G029219 // GRMZM5G812538 // GRMZM2G174458 // GRMZM5G843537 // GRMZM2G169363 // GRMZM…
GO:0006091	P	generation of precursor metabolites and energy	14	751	705	39203	0.48	1	// GRMZM2G064302 // GRMZM2G074122 // GRMZM2G031033 // GRMZM2G131575 // GRMZM5G833389 // GRMZM2G036759 // GRMZM2G113408 // GRMZM2G034243 // GRMZM2G155216 // GRMZM2G033515 // GRMZM2G012119 // GRMZM2G123371 // GRMZM2G175562 // GRMZM2G032628
GO:0006519	P	cellular amino acid and derivative metabolic process	21	751	985	39203	0.34	1	// GRMZM2G000052 // GRMZM2G383088 // GRMZM5G865943 // GRMZM2G034152 // GRMZM2G104546 // GRMZM2G119150 // GRMZM2G345717 // GRMZM2G061135 // GRMZM2G323719 // GRMZM2G117707 // GRMZM2G061777 // GRMZM2G150014 // GRMZM2G350020 // GRMZM2G313272 // GRMZM2G135970 // GRMZM2G120652 // AC203752.5_FG002 // GRMZM2G375504 // GRMZM2G031825 // GRMZM2G143357 // GRMZM2G478568
GO:0051276	P	chromosome organization	10	751	446	39203	0.36	1	// GRMZM2G107645 // GRMZM2G077991 // GRMZM2G112912 // GRMZM2G448458 // GRMZM2G119071 // GRMZM2G332838 // GRMZM2G106133 // GRMZM2G072855 // GRMZM2G063896 // AC233865.1_FG001
GO:0009409	P	response to cold	17	751	1758	39203	1	1	// GRMZM2G046885 // GRMZM5G862101 // GRMZM2G033356 // GRMZM2G099984 // GRMZM5G865943 // GRMZM2G113033 // GRMZM2G055575 // GRMZM2G134341 // GRMZM5G833389 // GRMZM2G061135 // GRMZM2G415793 // GRMZM2G411159 // GRMZM2G003385 // GRMZM2G379898 // GRMZM2G104626 // GRMZM2G001160 // GRMZM2G158835
GO:0044237	P	cellular metabolic process	296	751	14490	39203	0.09	1	// GRMZM2G413647 // GRMZM5G843537 // GRMZM2G003514 // GRMZM2G024668 // GRMZM2G128248 // AC234185.1_FG004 // GRMZM2G025387 // GRMZM2G040638 // GRMZM2G099909 // GRMZM2G493395 // GRMZM2G103152 // GRMZM2G128092 // GRMZM2G135970 // GRMZM2G061783 // GRMZM2G101000 // GRMZM2G394122 // GRMZM2G416964 // GRMZM2G360677 // GRMZM2G039385 // GRMZM2G033375 // GRMZM2G039934 // GRMZM2G316232 // GRMZM2G139900 // GR…
GO:0006066	P	alcohol metabolic process	16	751	729	39203	0.33	1	// GRMZM5G898915 // GRMZM2G086845 // GRMZM5G865943 // GRMZM2G413647 // GRMZM2G123371 // GRMZM5G833389 // GRMZM2G152888 // GRMZM2G064302 // GRMZM5G891282 // GRMZM2G019986 // GRMZM2G174675 // GRMZM2G003385 // GRMZM2G031568 // GRMZM2G032628 // GRMZM2G141510 // GRMZM2G011624
GO:0006796	P	phosphate metabolic process	56	751	2994	39203	0.59	1	// GRMZM2G025387 // GRMZM2G107645 // GRMZM2G018059 // GRMZM2G131575 // GRMZM2G086845 // GRMZM2G149051 // GRMZM2G104546 // GRMZM2G046848 // GRMZM2G101000 // GRMZM2G053722 // GRMZM2G176225 // GRMZM2G084806 // GRMZM2G461278 // GRMZM2G039934 // GRMZM5G833747 // GRMZM2G070252 // GRMZM2G150014 // GRMZM2G113408 // GRMZM2G072658 // GRMZM2G381076 // GRMZM2G382537 // GRMZM2G050701 // GRMZM2G076392 // GRMZM…
GO:0044085	P	cellular component biogenesis	20	751	1037	39203	0.52	1	// AC233865.1_FG001 // GRMZM2G128092 // GRMZM2G077942 // GRMZM2G077991 // GRMZM2G055450 // GRMZM2G112912 // GRMZM2G448458 // GRMZM2G063896 // GRMZM2G119071 // GRMZM5G830329 // GRMZM2G332838 // GRMZM2G106133 // GRMZM2G167497 // GRMZM2G145085 // GRMZM2G480074 // GRMZM2G035134 // GRMZM2G072855 // GRMZM2G175562 // GRMZM2G050556 // GRMZM2G071264
GO:0006396	P	RNA processing	8	751	460	39203	0.66	1	// GRMZM2G032104 // GRMZM2G445057 // GRMZM2G128092 // GRMZM2G149865 // GRMZM2G053223 // AC199526.5_FG003 // GRMZM2G061783 // GRMZM2G154278
GO:0006793	P	phosphorus metabolic process	57	751	2995	39203	0.54	1	// GRMZM2G025387 // GRMZM2G107645 // GRMZM2G018059 // GRMZM2G131575 // GRMZM2G086845 // GRMZM2G149051 // GRMZM2G104546 // GRMZM2G046848 // GRMZM2G101000 // GRMZM2G053722 // GRMZM2G176225 // GRMZM2G084806 // GRMZM2G461278 // GRMZM2G039934 // GRMZM5G833747 // GRMZM2G070252 // GRMZM2G150014 // GRMZM2G113408 // GRMZM2G072658 // GRMZM2G381076 // GRMZM2G382537 // GRMZM2G050701 // GRMZM2G076392 // GRMZM…
GO:0006259	P	DNA metabolic process	8	751	828	39203	0.99	1	// GRMZM2G141948 // GRMZM2G421541 // GRMZM2G369260 // GRMZM2G130351 // GRMZM2G001160 // GRMZM2G455243 // AC196278.2_FG003 // GRMZM2G348956
GO:0006412	P	translation	36	751	1871	39203	0.51	1	// GRMZM2G452026 // GRMZM2G091383 // GRMZM2G110509 // GRMZM2G035465 // AC203752.5_FG002 // GRMZM2G302712 // GRMZM2G360677 // GRMZM2G028216 // GRMZM2G316232 // GRMZM2G139900 // GRMZM2G087165 // GRMZM2G102891 // GRMZM2G163561 // GRMZM2G121309 // GRMZM2G035890 // GRMZM2G145308 // GRMZM2G074085 // GRMZM2G077991 // GRMZM2G149649 // GRMZM2G171181 // GRMZM2G093574 // GRMZM2G082707 // GRMZM2G168149 // GR…
GO:0003682	F	chromatin binding	13	751	50	39203	1.5e-10	9.9e-08	// GRMZM2G409974 // GRMZM2G157306 // GRMZM2G029850 // GRMZM2G379167 // GRMZM2G143640 // GRMZM2G003565 // GRMZM2G087955 // GRMZM2G037128 // GRMZM2G057408 // GRMZM2G135052 // GRMZM2G170049 // GRMZM2G052544 // AC197146.3_FG002
GO:0005515	F	protein binding	145	751	4766	39203	2e-08	6.8e-06	// GRMZM2G003514 // GRMZM2G024668 // GRMZM2G455243 // GRMZM2G099909 // GRMZM2G460472 // GRMZM2G053707 // GRMZM2G063850 // GRMZM2G364612 // GRMZM2G050268 // GRMZM2G034748 // GRMZM2G064775 // GRMZM2G035243 // GRMZM2G146246 // GRMZM2G039934 // GRMZM2G077809 // GRMZM5G827365 // GRMZM2G008482 // GRMZM2G121309 // GRMZM2G120652 // GRMZM2G044512 // GRMZM2G097059 // GRMZM2G052328 // GRMZM2G097989 // GRMZM…
GO:0016705	F	oxidoreductase activity, acting on paired donors, with incorporation or reduction of molecular oxygen	18	751	180	39203	4.6e-08	1.1e-05	// GRMZM2G057086 // AC193500.3_FG003 // GRMZM2G052825 // GRMZM2G078373 // GRMZM2G106408 // GRMZM2G123037 // GRMZM2G065635 // GRMZM2G345717 // GRMZM2G350020 // GRMZM2G062396 // GRMZM2G129761 // GRMZM2G384884 // GRMZM2G181456 // GRMZM2G363429 // GRMZM2G014395 // GRMZM2G034471 // GRMZM5G830329 // AC209987.4_FG002
GO:0042803	F	protein homodimerization activity	6	751	13	39203	9.5e-07	0.00016	// GRMZM2G046885 // GRMZM2G157157 // GRMZM2G003565 // GRMZM2G056600 // GRMZM2G008859 // GRMZM2G120652
GO:0019829	F	cation-transporting ATPase activity	9	751	101	39203	0.00024	0.027	// GRMZM2G056014 // GRMZM2G102786 // GRMZM2G407825 // GRMZM2G144420 // GRMZM2G104730 // GRMZM2G006977 // GRMZM2G035520 // GRMZM2G091228 // GRMZM2G357620
GO:0042802	F	identical protein binding	8	751	79	39203	0.00024	0.027	// GRMZM2G046885 // GRMZM2G157157 // GRMZM2G003565 // GRMZM5G842058 // GRMZM2G056600 // GRMZM2G008859 // GRMZM2G120652 // GRMZM2G132032
GO:0008374	F	O-acyltransferase activity	5	751	27	39203	0.00031	0.03	// GRMZM2G044472 // GRMZM2G313737 // GRMZM2G129266 // GRMZM2G031568 // GRMZM2G065203
GO:0016667	F	oxidoreductase activity, acting on sulfur group of donors	10	751	132	39203	0.00037	0.032	// GRMZM2G009968 // GRMZM2G025954 // GRMZM2G064679 // GRMZM5G825090 // GRMZM2G134957 // GRMZM5G892522 // GRMZM2G102382 // GRMZM2G462140 // GRMZM2G303044 // GRMZM2G318180
GO:0015035	F	protein disulfide oxidoreductase activity	8	751	94	39203	0.0007	0.053	// GRMZM2G009968 // GRMZM2G025954 // GRMZM5G825090 // GRMZM2G134957 // GRMZM5G892522 // GRMZM2G102382 // GRMZM2G303044 // GRMZM2G318180
GO:0015036	F	disulfide oxidoreductase activity	8	751	97	39203	0.00084	0.058	// GRMZM2G009968 // GRMZM2G025954 // GRMZM5G825090 // GRMZM2G134957 // GRMZM5G892522 // GRMZM2G102382 // GRMZM2G303044 // GRMZM2G318180
GO:0046983	F	protein dimerization activity	27	751	745	39203	0.0017	0.11	// GRMZM2G046885 // GRMZM2G157157 // GRMZM2G003514 // GRMZM2G448458 // GRMZM2G137541 // GRMZM2G460472 // GRMZM2G035465 // AC177924.2_FG001 // GRMZM2G033356 // GRMZM2G112912 // GRMZM2G702026 // GRMZM2G167576 // GRMZM2G144097 // GRMZM2G056600 // GRMZM2G121309 // GRMZM2G120652 // GRMZM2G072855 // GRMZM2G063896 // GRMZM2G097059 // GRMZM2G332838 // GRMZM2G350165 // GRMZM2G003565 // GRMZM2G104730 // GR…
GO:0016757	F	transferase activity, transferring glycosyl groups	26	751	747	39203	0.0035	0.2	// GRMZM2G113432 // GRMZM2G084515 // GRMZM2G000587 // GRMZM2G389944 // GRMZM2G480074 // GRMZM2G110145 // GRMZM2G044744 // GRMZM2G334336 // GRMZM2G388684 // GRMZM2G044096 // GRMZM2G150264 // GRMZM2G030165 // GRMZM2G103972 // GRMZM2G099231 // GRMZM2G124671 // GRMZM2G035755 // GRMZM2G090584 // GRMZM2G046583 // GRMZM2G017894 // GRMZM2G014770 // GRMZM2G349268 // GRMZM2G174675 // GRMZM2G176774 // GRMZM…
GO:0008415	F	acyltransferase activity	10	751	187	39203	0.0043	0.23	// GRMZM2G313737 // GRMZM2G136389 // GRMZM2G129266 // GRMZM2G065203 // GRMZM2G044472 // GRMZM2G011624 // GRMZM2G176723 // GRMZM2G104626 // GRMZM2G031568 // GRMZM2G364597
GO:0005507	F	copper ion binding	10	751	194	39203	0.0055	0.27	// GRMZM2G147884 // GRMZM2G113033 // GRMZM2G085392 // GRMZM2G076225 // GRMZM2G113408 // GRMZM2G145204 // GRMZM2G077317 // GRMZM2G462140 // GRMZM2G156516 // GRMZM2G091228
GO:0015082	F	di-, tri-valent inorganic cation transmembrane transporter activity	6	751	81	39203	0.006	0.27	// GRMZM2G144420 // GRMZM2G036908 // GRMZM2G104730 // GRMZM2G008859 // GRMZM2G006977 // GRMZM2G357620
GO:0016820	F	hydrolase activity, acting on acid anhydrides, catalyzing transmembrane movement of substances	13	751	322	39203	0.012	0.49	// GRMZM5G843537 // GRMZM2G056014 // GRMZM2G102786 // GRMZM2G407825 // GRMZM2G144420 // AC234203.1_FG004 // GRMZM2G113408 // GRMZM2G104730 // GRMZM2G145446 // GRMZM2G006977 // GRMZM2G035520 // GRMZM2G091228 // GRMZM2G357620
GO:0042626	F	ATPase activity, coupled to transmembrane movement of substances	12	751	300	39203	0.016	0.59	// GRMZM2G056014 // GRMZM2G102786 // GRMZM2G407825 // GRMZM2G144420 // AC234203.1_FG004 // GRMZM5G843537 // GRMZM2G104730 // GRMZM2G145446 // GRMZM2G006977 // GRMZM2G035520 // GRMZM2G091228 // GRMZM2G357620
GO:0008194	F	UDP-glycosyltransferase activity	8	751	164	39203	0.017	0.59	// GRMZM2G113432 // GRMZM2G084515 // GRMZM2G174675 // GRMZM2G349268 // GRMZM2G150264 // GRMZM2G030165 // GRMZM2G103972 // GRMZM2G110145
GO:0043492	F	ATPase activity, coupled to movement of substances	12	751	300	39203	0.016	0.59	// GRMZM2G056014 // GRMZM2G102786 // GRMZM2G407825 // GRMZM2G144420 // AC234203.1_FG004 // GRMZM5G843537 // GRMZM2G104730 // GRMZM2G145446 // GRMZM2G006977 // GRMZM2G035520 // GRMZM2G091228 // GRMZM2G357620
GO:0016758	F	transferase activity, transferring hexosyl groups	18	751	542	39203	0.02	0.7	// GRMZM2G124671 // GRMZM2G113432 // GRMZM2G044744 // GRMZM2G334336 // GRMZM2G035755 // GRMZM2G176774 // GRMZM2G095261 // GRMZM2G349268 // GRMZM2G044096 // GRMZM2G150264 // GRMZM2G030165 // GRMZM2G174675 // GRMZM2G084515 // GRMZM2G032628 // GRMZM2G103972 // GRMZM2G110145 // GRMZM2G389944 // GRMZM2G388684
GO:0042625	F	ATPase activity, coupled to transmembrane movement of ions	9	751	217	39203	0.028	0.89	// GRMZM2G056014 // GRMZM2G102786 // GRMZM2G407825 // GRMZM2G144420 // GRMZM2G104730 // GRMZM2G006977 // GRMZM2G035520 // GRMZM2G091228 // GRMZM2G357620
GO:0016765	F	transferase activity, transferring alkyl or aryl (other than methyl) groups	7	751	149	39203	0.029	0.89	// GRMZM2G146246 // GRMZM2G117707 // GRMZM2G097989 // GRMZM2G058404 // GRMZM2G061135 // GRMZM2G161905 // GRMZM2G478568
GO:0000166	F	nucleotide binding	124	751	6408	39203	0.47	1	// GRMZM2G083580 // GRMZM2G413647 // GRMZM2G024668 // GRMZM2G467907 // GRMZM2G455243 // GRMZM2G006977 // GRMZM2G039934 // GRMZM2G316232 // GRMZM2G407825 // GRMZM2G070252 // GRMZM2G019799 // GRMZM5G843537 // AC215201.3_FG005 // GRMZM2G064473 // GRMZM2G346113 // GRMZM2G026131 // GRMZM2G047800 // GRMZM2G310410 // GRMZM2G117250 // GRMZM2G112165 // GRMZM2G168416 // GRMZM2G406074 // GRMZM2G303768 // GR…
GO:0003924	F	GTPase activity	6	751	351	39203	0.66	1	// GRMZM2G157157 // GRMZM2G316232 // GRMZM2G110509 // GRMZM2G154218 // GRMZM2G070899 // GRMZM2G007038
GO:0016818	F	hydrolase activity, acting on acid anhydrides, in phosphorus-containing anhydrides	40	751	1958	39203	0.36	1	// GRMZM2G083580 // GRMZM2G157157 // GRMZM5G843537 // GRMZM2G110509 // GRMZM2G165757 // GRMZM2G455243 // GRMZM5G819464 // GRMZM2G001160 // GRMZM2G091088 // GRMZM2G059026 // GRMZM2G102786 // GRMZM2G019621 // GRMZM2G407825 // GRMZM2G359230 // GRMZM2G113408 // GRMZM2G357620 // GRMZM2G091228 // GRMZM2G026131 // AC234203.1_FG004 // GRMZM2G065480 // GRMZM2G104730 // GRMZM2G406074 // GRMZM2G007038 // GR…
GO:0016684	F	oxidoreductase activity, acting on peroxide as acceptor	6	751	329	39203	0.6	1	// GRMZM2G405581 // GRMZM2G405459 // GRMZM2G040638 // GRMZM2G129761 // GRMZM2G042347 // GRMZM2G131525
GO:0016810	F	hydrolase activity, acting on carbon-nitrogen (but not peptide) bonds	5	751	148	39203	0.16	1	// GRMZM2G135970 // GRMZM2G106376 // GRMZM2G327427 // GRMZM2G125552 // GRMZM2G103152
GO:0016817	F	hydrolase activity, acting on acid anhydrides	40	751	1980	39203	0.39	1	// GRMZM2G083580 // GRMZM2G157157 // GRMZM5G843537 // GRMZM2G110509 // GRMZM2G165757 // GRMZM2G455243 // GRMZM5G819464 // GRMZM2G001160 // GRMZM2G091088 // GRMZM2G059026 // GRMZM2G102786 // GRMZM2G019621 // GRMZM2G407825 // GRMZM2G359230 // GRMZM2G113408 // GRMZM2G357620 // GRMZM2G091228 // GRMZM2G026131 // AC234203.1_FG004 // GRMZM2G065480 // GRMZM2G104730 // GRMZM2G406074 // GRMZM2G007038 // GR…
GO:0016874	F	ligase activity	16	751	762	39203	0.39	1	// GRMZM2G074759 // AC234185.1_FG004 // GRMZM2G127690 // GRMZM2G492252 // GRMZM2G125867 // GRMZM2G121303 // GRMZM2G055037 // GRMZM2G033359 // GRMZM5G812228 // GRMZM2G313272 // GRMZM2G046848 // GRMZM2G156517 // GRMZM2G333861 // GRMZM2G018059 // AC203752.5_FG002 // GRMZM5G828302
GO:0005488	F	binding	426	751	24279	39203	1	1	// GRMZM2G162537 // GRMZM2G003514 // GRMZM2G167018 // GRMZM2G090595 // GRMZM2G137525 // GRMZM2G034748 // GRMZM2G407825 // GRMZM2G179981 // GRMZM2G104179 // GRMZM2G346113 // GRMZM2G099231 // GRMZM2G097059 // GRMZM2G087955 // GRMZM2G112165 // GRMZM2G169149 // GRMZM2G009282 // GRMZM2G303768 // GRMZM2G083749 // GRMZM2G168416 // GRMZM2G072115 // GRMZM2G171073 // GRMZM2G176774 // GRMZM2G059562 // GRMZM…
GO:0015399	F	primary active transmembrane transporter activity	13	751	394	39203	0.046	1	// GRMZM2G056014 // GRMZM2G157157 // GRMZM2G102786 // GRMZM2G407825 // GRMZM2G144420 // AC234203.1_FG004 // GRMZM5G843537 // GRMZM2G104730 // GRMZM2G145446 // GRMZM2G006977 // GRMZM2G035520 // GRMZM2G091228 // GRMZM2G357620
GO:0017076	F	purine nucleotide binding	102	751	6079	39203	0.93	1	// GRMZM2G083580 // GRMZM2G024668 // GRMZM2G455243 // GRMZM2G303768 // GRMZM2G039934 // GRMZM2G316232 // GRMZM2G407825 // GRMZM2G070252 // GRMZM2G019799 // GRMZM5G843537 // GRMZM2G064473 // GRMZM2G026131 // GRMZM2G310410 // GRMZM2G117250 // GRMZM2G112165 // GRMZM2G168416 // GRMZM2G406074 // GRMZM2G006977 // GRMZM5G852177 // GRMZM2G056014 // GRMZM2G152929 // GRMZM2G400806 // GRMZM2G144420 // GRMZM…
GO:0016787	F	hydrolase activity	108	751	6078	39203	0.81	1	// GRMZM2G162537 // GRMZM2G440459 // GRMZM2G445057 // GRMZM2G468255 // GRMZM2G455243 // GRMZM2G083580 // GRMZM2G135970 // GRMZM2G130528 // GRMZM2G033375 // GRMZM2G181259 // GRMZM2G316232 // GRMZM2G407825 // GRMZM2G388684 // GRMZM5G843537 // GRMZM2G026131 // GRMZM2G035517 // GRMZM5G873767 // AC234203.1_FG004 // GRMZM2G406074 // GRMZM2G006977 // GRMZM2G056014 // GRMZM2G144420 // GRMZM2G006341 // GR…
GO:0016788	F	hydrolase activity, acting on ester bonds	24	751	1355	39203	0.68	1	// GRMZM2G162537 // GRMZM2G440459 // GRMZM2G445057 // GRMZM5G829544 // GRMZM2G017982 // GRMZM2G053722 // GRMZM5G865943 // GRMZM2G033375 // GRMZM2G031825 // GRMZM2G130528 // GRMZM2G045716 // GRMZM2G374475 // GRMZM2G051577 // GRMZM5G873767 // GRMZM2G371793 // GRMZM2G166297 // GRMZM2G035134 // GRMZM5G894518 // GRMZM2G331720 // GRMZM5G886044 // GRMZM2G326270 // GRMZM2G108739 // GRMZM2G124179 // GRMZM…
GO:0004842	F	ubiquitin-protein ligase activity	5	751	141	39203	0.14	1	// GRMZM2G046848 // GRMZM2G156517 // GRMZM2G492252 // GRMZM2G018059 // GRMZM2G127690
GO:0016779	F	nucleotidyltransferase activity	5	751	468	39203	0.94	1	// GRMZM2G019986 // GRMZM2G141948 // AC196278.2_FG003 // GRMZM2G072115 // GRMZM2G130351
GO:0016773	F	phosphotransferase activity, alcohol group as acceptor	42	751	2858	39203	0.97	1	// GRMZM2G137558 // GRMZM2G025387 // GRMZM2G107645 // GRMZM2G018059 // GRMZM2G086845 // GRMZM2G149051 // GRMZM2G046848 // GRMZM2G176225 // GRMZM2G084806 // GRMZM2G461278 // GRMZM2G039934 // GRMZM2G024834 // GRMZM2G072658 // GRMZM2G381076 // GRMZM2G382537 // GRMZM2G050701 // GRMZM2G076392 // GRMZM2G017164 // GRMZM2G141510 // GRMZM2G164242 // GRMZM2G310410 // GRMZM2G117250 // GRMZM2G468756 // GRMZM…
GO:0016772	F	transferase activity, transferring phosphorus-containing groups	59	751	3661	39203	0.93	1	// GRMZM2G137558 // GRMZM2G025387 // GRMZM2G109967 // GRMZM2G107645 // GRMZM2G018059 // GRMZM2G019986 // GRMZM2G375504 // GRMZM2G323719 // GRMZM2G149051 // GRMZM2G104546 // GRMZM2G046848 // GRMZM2G061783 // GRMZM2G176225 // GRMZM2G084806 // GRMZM2G141948 // GRMZM2G152040 // GRMZM2G461278 // GRMZM2G039934 // GRMZM5G833747 // GRMZM2G070252 // GRMZM2G150014 // GRMZM2G072658 // GRMZM2G381076 // GRMZM…
GO:0015075	F	ion transmembrane transporter activity	21	751	1258	39203	0.77	1	// GRMZM2G011592 // GRMZM2G056014 // GRMZM2G102786 // GRMZM2G150337 // GRMZM2G407825 // GRMZM2G144420 // GRMZM2G017365 // GRMZM2G131575 // GRMZM2G375116 // GRMZM2G036908 // GRMZM2G113408 // GRMZM2G104730 // GRMZM2G005040 // GRMZM2G090149 // GRMZM2G028432 // GRMZM2G086496 // GRMZM2G008859 // GRMZM2G006977 // GRMZM2G035520 // GRMZM2G091228 // GRMZM2G357620
GO:0032559	F	adenyl ribonucleotide binding	86	751	5137	39203	0.92	1	// GRMZM2G083580 // GRMZM2G024668 // GRMZM2G455243 // GRMZM2G303768 // GRMZM2G039934 // GRMZM2G407825 // GRMZM2G070252 // GRMZM5G843537 // GRMZM2G064473 // GRMZM2G026131 // GRMZM2G310410 // GRMZM2G117250 // GRMZM2G112165 // GRMZM2G168416 // GRMZM2G406074 // GRMZM2G006977 // GRMZM5G852177 // GRMZM2G056014 // GRMZM2G400806 // GRMZM2G144420 // GRMZM2G006341 // GRMZM2G133764 // GRMZM2G348956 // GRMZM…
GO:0032555	F	purine ribonucleotide binding	95	751	5800	39203	0.96	1	// GRMZM2G083580 // GRMZM2G024668 // GRMZM2G455243 // GRMZM2G303768 // GRMZM2G039934 // GRMZM2G316232 // GRMZM2G407825 // GRMZM2G070252 // GRMZM5G843537 // GRMZM2G064473 // GRMZM2G026131 // GRMZM2G310410 // GRMZM2G117250 // GRMZM2G112165 // GRMZM2G168416 // GRMZM2G406074 // GRMZM2G006977 // GRMZM5G852177 // GRMZM2G056014 // GRMZM2G152929 // GRMZM2G400806 // GRMZM2G144420 // GRMZM2G006341 // GRMZM…
GO:0032553	F	ribonucleotide binding	95	751	5800	39203	0.96	1	// GRMZM2G083580 // GRMZM2G024668 // GRMZM2G455243 // GRMZM2G303768 // GRMZM2G039934 // GRMZM2G316232 // GRMZM2G407825 // GRMZM2G070252 // GRMZM5G843537 // GRMZM2G064473 // GRMZM2G026131 // GRMZM2G310410 // GRMZM2G117250 // GRMZM2G112165 // GRMZM2G168416 // GRMZM2G406074 // GRMZM2G006977 // GRMZM5G852177 // GRMZM2G056014 // GRMZM2G152929 // GRMZM2G400806 // GRMZM2G144420 // GRMZM2G006341 // GRMZM…
GO:0043565	F	sequence-specific DNA binding	23	751	985	39203	0.2	1	// GRMZM2G046885 // GRMZM2G125653 // GRMZM2G125243 // GRMZM2G123140 // GRMZM2G009530 // GRMZM2G044576 // GRMZM2G093595 // GRMZM2G094081 // GRMZM2G167576 // GRMZM2G120320 // GRMZM2G056600 // GRMZM2G092137 // GRMZM2G101058 // GRMZM2G097349 // GRMZM2G452178 // GRMZM2G169149 // GRMZM2G061101 // GRMZM2G370026 // GRMZM2G059562 // GRMZM5G832409 // GRMZM5G880069 // GRMZM2G119999 // GRMZM2G130374
GO:0005509	F	calcium ion binding	12	751	534	39203	0.33	1	// GRMZM2G176225 // GRMZM2G152891 // GRMZM2G025387 // GRMZM2G152040 // GRMZM5G865943 // GRMZM2G114399 // GRMZM2G097900 // GRMZM2G040094 // GRMZM2G104125 // AC210013.4_FG014 // GRMZM2G072174 // GRMZM2G175562
GO:0005506	F	iron ion binding	24	751	1187	39203	0.42	1	// GRMZM2G163683 // GRMZM2G106408 // GRMZM2G065635 // GRMZM2G040638 // GRMZM2G062396 // GRMZM2G083526 // GRMZM2G019799 // GRMZM2G405581 // GRMZM2G042347 // GRMZM2G014395 // GRMZM5G830329 // AC209987.4_FG002 // GRMZM2G123037 // GRMZM2G003526 // GRMZM2G350020 // GRMZM2G168898 // GRMZM2G181456 // GRMZM2G052825 // GRMZM2G131525 // GRMZM2G057086 // GRMZM2G405459 // GRMZM2G384884 // GRMZM2G363429 // GR…
GO:0008324	F	cation transmembrane transporter activity	20	751	996	39203	0.45	1	// GRMZM2G011592 // GRMZM2G056014 // GRMZM2G102786 // GRMZM2G150337 // GRMZM2G407825 // GRMZM2G144420 // GRMZM2G017365 // GRMZM2G131575 // GRMZM2G375116 // GRMZM2G036908 // GRMZM2G113408 // GRMZM2G104730 // GRMZM2G005040 // GRMZM2G090149 // GRMZM2G028432 // GRMZM2G008859 // GRMZM2G006977 // GRMZM2G035520 // GRMZM2G091228 // GRMZM2G357620
GO:0008289	F	lipid binding	5	751	202	39203	0.35	1	// GRMZM2G117022 // GRMZM2G107839 // GRMZM2G055450 // GRMZM2G050556 // GRMZM2G340359
GO:0048037	F	cofactor binding	26	751	1034	39203	0.1	1	// GRMZM2G413647 // GRMZM2G179981 // GRMZM2G019799 // GRMZM2G104546 // GRMZM2G462140 // GRMZM2G152888 // GRMZM2G120563 // AC193500.3_FG003 // GRMZM2G334941 // GRMZM2G034152 // GRMZM2G119150 // GRMZM2G145204 // GRMZM2G143357 // GRMZM2G147884 // GRMZM2G443445 // GRMZM2G080044 // GRMZM2G175396 // GRMZM2G000236 // GRMZM2G078480 // AC203909.3_FG007 // GRMZM2G468439 // AC203909.3_FG003 // GRMZM2G009681…
GO:0016853	F	isomerase activity	11	751	567	39203	0.53	1	// GRMZM5G898915 // GRMZM2G415793 // GRMZM2G150337 // GRMZM2G001956 // GRMZM2G096585 // GRMZM5G833389 // GRMZM5G891282 // GRMZM2G008647 // GRMZM2G003385 // GRMZM2G039588 // GRMZM2G117746
GO:0001883	F	purine nucleoside binding	93	751	5398	39203	0.88	1	// GRMZM2G083580 // GRMZM2G024668 // GRMZM2G455243 // GRMZM2G303768 // GRMZM2G039934 // GRMZM2G407825 // GRMZM2G070252 // GRMZM2G019799 // GRMZM5G843537 // GRMZM2G064473 // GRMZM2G026131 // GRMZM2G310410 // GRMZM2G117250 // GRMZM2G112165 // GRMZM2G168416 // GRMZM2G406074 // GRMZM2G006977 // GRMZM5G852177 // GRMZM2G056014 // GRMZM2G400806 // GRMZM2G144420 // GRMZM2G006341 // GRMZM2G133764 // GRMZM…
GO:0001882	F	nucleoside binding	93	751	5400	39203	0.88	1	// GRMZM2G083580 // GRMZM2G024668 // GRMZM2G455243 // GRMZM2G303768 // GRMZM2G039934 // GRMZM2G407825 // GRMZM2G070252 // GRMZM2G019799 // GRMZM5G843537 // GRMZM2G064473 // GRMZM2G026131 // GRMZM2G310410 // GRMZM2G117250 // GRMZM2G112165 // GRMZM2G168416 // GRMZM2G406074 // GRMZM2G006977 // GRMZM5G852177 // GRMZM2G056014 // GRMZM2G400806 // GRMZM2G144420 // GRMZM2G006341 // GRMZM2G133764 // GRMZM…
GO:0003735	F	structural constituent of ribosome	24	751	1378	39203	0.71	1	// GRMZM2G091383 // GRMZM2G302712 // GRMZM2G360677 // GRMZM2G028216 // GRMZM2G139900 // GRMZM2G087165 // GRMZM2G102891 // GRMZM2G163561 // GRMZM2G145308 // GRMZM2G074085 // GRMZM2G077991 // GRMZM2G149649 // GRMZM2G171181 // GRMZM2G093574 // GRMZM2G082707 // GRMZM2G168149 // GRMZM2G394122 // GRMZM2G379128 // GRMZM2G149975 // GRMZM2G027728 // GRMZM2G077851 // GRMZM2G032564 // GRMZM2G326066 // GRMZM…
GO:0070011	F	peptidase activity, acting on L-amino acid peptides	17	751	1493	39203	0.99	1	// GRMZM2G066326 // GRMZM2G382581 // GRMZM2G035517 // GRMZM2G165969 // GRMZM2G081504 // GRMZM2G025491 // GRMZM2G468255 // GRMZM2G320206 // GRMZM2G152419 // GRMZM2G070455 // GRMZM2G108739 // GRMZM2G135970 // GRMZM2G108849 // GRMZM2G132032 // GRMZM2G133919 // GRMZM2G411333 // GRMZM2G059026
GO:0004497	F	monooxygenase activity	13	751	553	39203	0.27	1	// GRMZM2G057086 // AC193500.3_FG003 // GRMZM2G113033 // GRMZM2G106408 // GRMZM2G123037 // GRMZM2G065635 // GRMZM2G181456 // GRMZM2G350020 // GRMZM2G384884 // GRMZM2G363429 // GRMZM2G052825 // GRMZM5G830329 // AC209987.4_FG002
GO:0016740	F	transferase activity	128	751	5727	39203	0.037	1	// GRMZM2G084515 // GRMZM2G493395 // GRMZM2G389944 // GRMZM2G061783 // GRMZM2G364597 // GRMZM2G065203 // GRMZM2G146246 // GRMZM2G039934 // GRMZM2G070252 // GRMZM2G119150 // GRMZM2G150264 // GRMZM2G030165 // GRMZM2G382537 // GRMZM2G031568 // GRMZM2G099231 // GRMZM2G313737 // GRMZM2G702725 // GRMZM2G117707 // GRMZM2G035755 // GRMZM2G097989 // GRMZM2G310410 // GRMZM2G117250 // GRMZM2G038170 // GRMZM…
GO:0016741	F	transferase activity, transferring one-carbon groups	13	751	495	39203	0.16	1	// GRMZM2G149681 // GRMZM2G000052 // GRMZM2G016546 // GRMZM2G099297 // GRMZM2G099729 // GRMZM2G032104 // GRMZM2G360389 // GRMZM2G149865 // GRMZM2G104730 // GRMZM2G034697 // GRMZM2G405503 // GRMZM2G061401 // GRMZM2G179220
GO:0016746	F	transferase activity, transferring acyl groups	14	751	437	39203	0.048	1	// GRMZM2G313737 // GRMZM2G136389 // GRMZM2G364597 // GRMZM2G129266 // GRMZM2G135498 // GRMZM2G065203 // GRMZM2G038170 // GRMZM2G091228 // GRMZM2G176723 // GRMZM2G024350 // GRMZM2G104626 // GRMZM2G031568 // GRMZM2G044472 // GRMZM2G011624
GO:0016747	F	transferase activity, transferring acyl groups other than amino-acyl groups	12	751	357	39203	0.048	1	// GRMZM2G313737 // GRMZM2G136389 // GRMZM2G129266 // GRMZM2G135498 // GRMZM2G065203 // GRMZM2G044472 // GRMZM2G011624 // GRMZM2G176723 // GRMZM2G024350 // GRMZM2G104626 // GRMZM2G031568 // GRMZM2G364597
GO:0016209	F	antioxidant activity	6	751	374	39203	0.72	1	// GRMZM2G405581 // GRMZM2G405459 // GRMZM2G040638 // GRMZM2G129761 // GRMZM2G042347 // GRMZM2G131525
GO:0004386	F	helicase activity	7	751	330	39203	0.45	1	// GRMZM2G083580 // GRMZM2G001160 // GRMZM2G133764 // GRMZM2G406074 // GRMZM2G443889 // GRMZM2G359230 // GRMZM2G013761
GO:0020037	F	heme binding	19	751	876	39203	0.33	1	// GRMZM2G057086 // GRMZM2G052825 // AC209987.4_FG002 // GRMZM2G106408 // GRMZM2G123037 // GRMZM2G065635 // GRMZM2G405459 // GRMZM2G040638 // GRMZM2G181456 // GRMZM2G405581 // GRMZM2G350020 // GRMZM2G384884 // GRMZM2G042347 // GRMZM2G168898 // GRMZM2G363429 // GRMZM2G014395 // GRMZM2G034471 // GRMZM5G830329 // GRMZM2G131525
GO:0022891	F	substrate-specific transmembrane transporter activity	29	751	1472	39203	0.47	1	// GRMZM2G157157 // GRMZM2G136508 // GRMZM2G131575 // GRMZM2G375116 // GRMZM2G086496 // GRMZM2G119970 // GRMZM2G011592 // GRMZM2G102786 // GRMZM2G160460 // GRMZM2G407825 // GRMZM2G113408 // GRMZM2G091228 // GRMZM2G357620 // GRMZM2G383088 // GRMZM2G133322 // GRMZM2G174807 // GRMZM2G104730 // GRMZM2G005040 // GRMZM2G008859 // GRMZM2G006977 // GRMZM2G056014 // GRMZM2G150337 // GRMZM2G144420 // GRMZM…
GO:0022890	F	inorganic cation transmembrane transporter activity	12	751	431	39203	0.13	1	// GRMZM2G144420 // GRMZM2G131575 // GRMZM2G375116 // GRMZM2G036908 // GRMZM2G113408 // GRMZM2G104730 // GRMZM2G005040 // GRMZM2G090149 // GRMZM2G028432 // GRMZM2G008859 // GRMZM2G006977 // GRMZM2G357620
GO:0022892	F	substrate-specific transporter activity	30	751	1632	39203	0.62	1	// GRMZM2G157157 // GRMZM2G136508 // GRMZM2G131575 // GRMZM2G375116 // GRMZM2G086496 // GRMZM2G119970 // GRMZM2G011592 // GRMZM2G102786 // GRMZM2G160460 // GRMZM2G407825 // GRMZM2G113408 // GRMZM2G479703 // GRMZM2G091228 // GRMZM2G357620 // GRMZM2G383088 // GRMZM2G133322 // GRMZM2G174807 // GRMZM2G104730 // GRMZM2G005040 // GRMZM2G008859 // GRMZM2G006977 // GRMZM2G056014 // GRMZM2G150337 // GRMZM…
GO:0016879	F	ligase activity, forming carbon-nitrogen bonds	10	751	514	39203	0.52	1	// AC234185.1_FG004 // GRMZM2G127690 // GRMZM2G492252 // GRMZM2G033359 // GRMZM5G828302 // GRMZM2G313272 // GRMZM2G046848 // GRMZM2G156517 // GRMZM2G018059 // GRMZM2G121303
GO:0019001	F	guanyl nucleotide binding	9	751	784	39203	0.96	1	// GRMZM2G157157 // GRMZM2G061812 // GRMZM2G316232 // GRMZM2G110509 // GRMZM2G154218 // GRMZM2G070899 // GRMZM2G086971 // GRMZM2G007038 // GRMZM2G152929
GO:0016791	F	phosphatase activity	8	751	347	39203	0.35	1	// GRMZM2G166297 // GRMZM2G124179 // GRMZM2G440459 // GRMZM2G371793 // GRMZM2G326270 // GRMZM2G017982 // GRMZM2G035134 // GRMZM2G053722
GO:0016790	F	thiolester hydrolase activity	5	751	124	39203	0.097	1	// GRMZM5G894518 // GRMZM2G031825 // GRMZM2G033375 // GRMZM5G829544 // GRMZM2G108739
GO:0070279	F	vitamin B6 binding	5	751	226	39203	0.44	1	// GRMZM2G141810 // GRMZM2G175396 // GRMZM2G119150 // GRMZM2G120563 // GRMZM2G152888
GO:0016491	F	oxidoreductase activity	66	751	3266	39203	0.35	1	// GRMZM2G163683 // GRMZM2G375504 // GRMZM2G078373 // GRMZM2G413647 // GRMZM2G009968 // GRMZM2G065635 // GRMZM2G104546 // GRMZM2G035268 // GRMZM2G036759 // GRMZM2G040638 // GRMZM2G062396 // GRMZM2G129761 // GRMZM2G102382 // GRMZM2G462140 // GRMZM2G076225 // AC209987.4_FG002 // AC193500.3_FG003 // GRMZM2G083526 // GRMZM2G106408 // GRMZM2G034152 // GRMZM2G064679 // GRMZM2G019799 // GRMZM2G405581 //…
GO:0032561	F	guanyl ribonucleotide binding	9	751	768	39203	0.96	1	// GRMZM2G157157 // GRMZM2G061812 // GRMZM2G316232 // GRMZM2G110509 // GRMZM2G154218 // GRMZM2G070899 // GRMZM2G086971 // GRMZM2G007038 // GRMZM2G152929
GO:0009055	F	electron carrier activity	23	751	914	39203	0.12	1	// GRMZM2G106408 // GRMZM2G009968 // GRMZM2G065635 // GRMZM2G102382 // GRMZM2G019799 // GRMZM2G085392 // GRMZM2G134957 // GRMZM2G014395 // GRMZM5G830329 // AC209987.4_FG002 // GRMZM2G123037 // GRMZM5G892522 // GRMZM2G350020 // GRMZM2G181456 // GRMZM2G052825 // GRMZM2G318180 // GRMZM2G057086 // GRMZM2G025954 // GRMZM5G825090 // GRMZM2G384884 // GRMZM2G363429 // GRMZM2G303044 // GRMZM2G034471
GO:0005215	F	transporter activity	44	751	2411	39203	0.65	1	// GRMZM2G157157 // GRMZM2G136508 // GRMZM2G120563 // GRMZM2G131575 // GRMZM2G375116 // GRMZM2G091228 // GRMZM2G086496 // GRMZM2G125850 // GRMZM2G119970 // GRMZM2G064473 // GRMZM2G174458 // GRMZM5G843537 // GRMZM2G102786 // GRMZM2G160460 // GRMZM2G407825 // GRMZM2G363229 // GRMZM2G113408 // GRMZM2G010834 // GRMZM2G479703 // GRMZM2G133322 // GRMZM2G357620 // GRMZM2G079889 // GRMZM2G383088 // GRMZM…
GO:0008135	F	translation factor activity, nucleic acid binding	7	751	201	39203	0.099	1	// GRMZM2G452026 // GRMZM2G316232 // GRMZM2G110509 // GRMZM2G154218 // GRMZM2G007038 // GRMZM5G835323 // GRMZM2G113096
GO:0030170	F	pyridoxal phosphate binding	5	751	226	39203	0.44	1	// GRMZM2G141810 // GRMZM2G175396 // GRMZM2G119150 // GRMZM2G120563 // GRMZM2G152888
GO:0004175	F	endopeptidase activity	10	751	932	39203	0.98	1	// GRMZM2G382581 // GRMZM2G165969 // GRMZM2G152419 // GRMZM2G025491 // GRMZM2G320206 // GRMZM2G070455 // GRMZM2G108849 // GRMZM2G132032 // GRMZM2G133919 // GRMZM2G411333
GO:0016887	F	ATPase activity	23	751	785	39203	0.034	1	// GRMZM2G083580 // GRMZM2G165757 // GRMZM2G113408 // GRMZM2G059026 // GRMZM2G102786 // GRMZM2G407825 // GRMZM5G843537 // GRMZM2G091228 // GRMZM2G357620 // AC234203.1_FG004 // GRMZM2G065480 // GRMZM2G104730 // GRMZM2G006977 // GRMZM2G308860 // GRMZM2G432480 // GRMZM2G056014 // GRMZM2G144420 // GRMZM2G119345 // GRMZM2G001160 // GRMZM2G133764 // GRMZM2G145446 // GRMZM2G443889 // GRMZM2G035520
GO:0030246	F	carbohydrate binding	10	751	271	39203	0.041	1	// GRMZM2G176225 // GRMZM5G898915 // GRMZM2G009282 // GRMZM2G174675 // GRMZM2G176774 // GRMZM2G468756 // GRMZM2G034243 // GRMZM2G124671 // GRMZM2G005633 // GRMZM2G039588
GO:0022857	F	transmembrane transporter activity	38	751	1672	39203	0.16	1	// GRMZM2G157157 // GRMZM2G136508 // GRMZM2G131575 // GRMZM2G375116 // GRMZM2G091228 // GRMZM2G086496 // GRMZM2G120563 // GRMZM2G119970 // GRMZM2G174458 // GRMZM5G843537 // GRMZM2G102786 // GRMZM2G160460 // GRMZM2G407825 // GRMZM2G363229 // GRMZM2G113408 // GRMZM2G064473 // GRMZM2G133322 // GRMZM2G357620 // GRMZM2G383088 // GRMZM2G087479 // GRMZM2G011592 // AC234203.1_FG004 // GRMZM2G174807 // GR…
GO:0004674	F	protein serine/threonine kinase activity	28	751	2248	39203	0.99	1	// GRMZM2G025387 // GRMZM2G107645 // GRMZM2G149051 // GRMZM2G046848 // GRMZM2G176225 // GRMZM2G461278 // GRMZM2G039934 // GRMZM2G042055 // GRMZM2G381076 // GRMZM2G050701 // GRMZM2G017164 // GRMZM2G164242 // GRMZM2G117250 // GRMZM2G468756 // GRMZM2G023836 // GRMZM2G028037 // GRMZM2G072658 // GRMZM2G311328 // GRMZM5G852177 // GRMZM2G016477 // GRMZM2G168416 // GRMZM2G422340 // GRMZM2G114899 // GRMZM…
GO:0004672	F	protein kinase activity	35	751	2423	39203	0.97	1	// GRMZM2G025387 // GRMZM2G107645 // GRMZM2G018059 // GRMZM2G149051 // GRMZM2G046848 // GRMZM2G176225 // GRMZM2G084806 // GRMZM2G461278 // GRMZM2G039934 // GRMZM2G024834 // GRMZM2G072658 // GRMZM2G381076 // GRMZM2G050701 // GRMZM2G017164 // GRMZM2G164242 // GRMZM2G310410 // GRMZM2G117250 // GRMZM2G468756 // GRMZM2G023836 // GRMZM2G028037 // GRMZM2G153527 // GRMZM2G303768 // GRMZM2G311328 // GRMZM…
GO:0017111	F	nucleoside-triphosphatase activity	39	751	1822	39203	0.26	1	// GRMZM2G083580 // GRMZM2G157157 // GRMZM2G110509 // GRMZM2G165757 // GRMZM2G455243 // GRMZM5G819464 // GRMZM2G001160 // GRMZM2G091088 // GRMZM2G059026 // GRMZM2G102786 // GRMZM2G019621 // GRMZM2G407825 // GRMZM5G843537 // GRMZM2G357620 // GRMZM2G091228 // GRMZM2G026131 // AC234203.1_FG004 // GRMZM2G065480 // GRMZM2G113408 // GRMZM2G406074 // GRMZM2G007038 // GRMZM2G006977 // GRMZM2G013761 // GR…
GO:0003700	F	transcription factor activity	30	751	1390	39203	0.28	1	// GRMZM2G046885 // GRMZM2G125653 // GRMZM2G003514 // GRMZM2G125243 // GRMZM2G521481 // GRMZM2G123140 // GRMZM2G009530 // GRMZM2G044576 // GRMZM2G093595 // GRMZM2G120320 // GRMZM2G056600 // GRMZM2G092137 // AC209257.4_FG006 // GRMZM2G101058 // GRMZM2G097059 // GRMZM2G097349 // GRMZM2G026157 // GRMZM2G452178 // GRMZM2G169149 // GRMZM2G361842 // GRMZM2G061101 // GRMZM2G003466 // GRMZM2G370026 // GR…
GO:0060089	F	molecular transducer activity	5	751	1377	39203	1	1	// GRMZM2G409974 // GRMZM2G150337 // GRMZM2G176506 // GRMZM2G098474 // GRMZM2G148056
GO:0046873	F	metal ion transmembrane transporter activity	10	751	328	39203	0.11	1	// GRMZM2G150337 // GRMZM2G144420 // GRMZM2G375116 // GRMZM2G036908 // GRMZM2G104730 // GRMZM2G005040 // GRMZM2G090149 // GRMZM2G008859 // GRMZM2G006977 // GRMZM2G357620
GO:0046872	F	metal ion binding	128	751	6652	39203	0.49	1	// GRMZM2G106408 // GRMZM2G025387 // GRMZM2G090595 // GRMZM2G040638 // GRMZM2G053707 // GRMZM2G364612 // GRMZM2G405581 // GRMZM2G077809 // GRMZM2G407825 // GRMZM2G019799 // GRMZM2G113408 // GRMZM2G155216 // AC213654.3_FG001 // GRMZM2G346113 // AC209987.4_FG002 // GRMZM2G455243 // GRMZM2G038170 // GRMZM2G103465 // GRMZM2G006977 // GRMZM5G836222 // GRMZM2G056014 // GRMZM2G113033 // GRMZM2G171073 //…
GO:0016798	F	hydrolase activity, acting on glycosyl bonds	17	751	821	39203	0.41	1	// GRMZM2G164676 // GRMZM2G148167 // GRMZM2G035503 // GRMZM2G181259 // GRMZM2G310739 // GRMZM2G115065 // GRMZM2G055699 // GRMZM2G388684 // GRMZM2G005633 // GRMZM2G035890 // GRMZM5G824920 // GRMZM2G471065 // GRMZM2G009282 // GRMZM2G022782 // GRMZM2G146192 // GRMZM2G032628 // GRMZM2G119494
GO:0015405	F	P-P-bond-hydrolysis-driven transmembrane transporter activity	13	751	394	39203	0.046	1	// GRMZM2G056014 // GRMZM2G157157 // GRMZM2G102786 // GRMZM2G407825 // GRMZM2G144420 // AC234203.1_FG004 // GRMZM5G843537 // GRMZM2G104730 // GRMZM2G145446 // GRMZM2G006977 // GRMZM2G035520 // GRMZM2G091228 // GRMZM2G357620
GO:0016881	F	acid-amino acid ligase activity	8	751	390	39203	0.47	1	// GRMZM2G018059 // GRMZM2G127690 // GRMZM2G492252 // GRMZM2G033359 // GRMZM5G828302 // GRMZM2G046848 // GRMZM2G156517 // GRMZM2G121303
GO:0003676	F	nucleic acid binding	125	751	8298	39203	1	1	// GRMZM2G162537 // GRMZM2G125653 // GRMZM2G003514 // GRMZM2G467907 // GRMZM2G167018 // GRMZM2G090595 // GRMZM2G398024 // GRMZM2G455243 // GRMZM2G083580 // GRMZM2G137525 // GRMZM2G364597 // GRMZM2G449123 // GRMZM2G316232 // GRMZM2G113408 // GRMZM2G089562 // GRMZM2G092137 // GRMZM2G346113 // GRMZM2G106133 // GRMZM2G097059 // GRMZM2G313737 // GRMZM2G702725 // GRMZM2G445057 // GRMZM2G026157 // GRMZM…
GO:0003677	F	DNA binding	78	751	5003	39203	0.98	1	// GRMZM2G046885 // GRMZM2G104074 // GRMZM2G383210 // GRMZM2G421899 // GRMZM2G029850 // GRMZM2G421541 // GRMZM2G125653 // GRMZM2G003514 // GRMZM2G093595 // GRMZM2G167018 // GRMZM2G125243 // GRMZM5G880069 // GRMZM2G361842 // GRMZM2G521481 // GRMZM2G119071 // GRMZM2G126936 // GRMZM2G130374 // GRMZM2G138455 // GRMZM2G135052 // GRMZM2G141948 // GRMZM2G033356 // GRMZM2G332838 // GRMZM2G123140 // GRMZM…
GO:0008168	F	methyltransferase activity	13	751	471	39203	0.13	1	// GRMZM2G149681 // GRMZM2G000052 // GRMZM2G016546 // GRMZM2G099297 // GRMZM2G099729 // GRMZM2G032104 // GRMZM2G360389 // GRMZM2G149865 // GRMZM2G104730 // GRMZM2G034697 // GRMZM2G405503 // GRMZM2G061401 // GRMZM2G179220
GO:0042623	F	ATPase activity, coupled	17	751	579	39203	0.06	1	// GRMZM2G056014 // GRMZM2G059026 // GRMZM2G102786 // GRMZM2G407825 // GRMZM2G144420 // AC234203.1_FG004 // GRMZM2G001160 // GRMZM5G843537 // GRMZM2G104730 // GRMZM2G083580 // GRMZM2G145446 // GRMZM2G443889 // GRMZM2G006977 // GRMZM2G035520 // GRMZM2G091228 // GRMZM2G357620 // GRMZM2G133764
GO:0005524	F	ATP binding	83	751	5133	39203	0.96	1	// GRMZM2G432480 // GRMZM2G025387 // GRMZM2G083580 // GRMZM2G107645 // GRMZM5G843537 // GRMZM2G042055 // AC215201.3_FG005 // GRMZM2G165757 // GRMZM2G050701 // GRMZM2G091155 // GRMZM2G348956 // GRMZM2G455243 // GRMZM2G024834 // GRMZM2G149051 // GRMZM5G819464 // GRMZM2G104546 // GRMZM2G046848 // GRMZM2G462140 // GRMZM2G001160 // GRMZM2G018059 // GRMZM2G006977 // GRMZM2G064473 // GRMZM2G176225 // GR…
GO:0005525	F	GTP binding	9	751	768	39203	0.96	1	// GRMZM2G157157 // GRMZM2G061812 // GRMZM2G316232 // GRMZM2G110509 // GRMZM2G154218 // GRMZM2G070899 // GRMZM2G086971 // GRMZM2G007038 // GRMZM2G152929
GO:0016301	F	kinase activity	48	751	3006	39203	0.92	1	// GRMZM2G025387 // GRMZM2G107645 // GRMZM2G018059 // GRMZM2G375504 // GRMZM2G323719 // GRMZM2G149051 // GRMZM2G104546 // GRMZM2G046848 // GRMZM2G176225 // GRMZM2G084806 // GRMZM2G461278 // GRMZM2G039934 // GRMZM5G833747 // GRMZM2G070252 // GRMZM2G150014 // GRMZM2G072658 // GRMZM2G381076 // GRMZM2G382537 // GRMZM2G050701 // GRMZM2G076392 // GRMZM2G017164 // GRMZM2G141510 // GRMZM2G164242 // GRMZM…
GO:0003824	F	catalytic activity	341	751	17617	39203	0.41	1	// GRMZM2G162537 // GRMZM2G084515 // GRMZM2G440459 // GRMZM2G413647 // GRMZM5G843537 // GRMZM2G025387 // AC234185.1_FG004 // GRMZM2G468255 // GRMZM2G086845 // GRMZM2G040638 // GRMZM2G493395 // GRMZM5G824920 // GRMZM2G103152 // GRMZM2G129761 // GRMZM2G135970 // GRMZM2G389944 // GRMZM2G061783 // GRMZM2G055037 // GRMZM2G006977 // GRMZM2G139624 // GRMZM2G405581 // GRMZM2G065203 // GRMZM2G106408 // GR…
GO:0004553	F	hydrolase activity, hydrolyzing O-glycosyl compounds	15	751	767	39203	0.5	1	// GRMZM2G164676 // GRMZM2G009282 // GRMZM2G035503 // GRMZM2G181259 // GRMZM2G310739 // GRMZM2G115065 // GRMZM2G055699 // GRMZM2G388684 // GRMZM2G005633 // GRMZM5G824920 // GRMZM2G471065 // GRMZM2G022782 // GRMZM2G146192 // GRMZM2G032628 // GRMZM2G119494
GO:0046906	F	tetrapyrrole binding	20	751	880	39203	0.25	1	// GRMZM2G057086 // GRMZM2G052825 // AC209987.4_FG002 // GRMZM2G106408 // GRMZM2G123037 // GRMZM2G065635 // GRMZM2G405459 // GRMZM2G040638 // GRMZM2G181456 // GRMZM2G405581 // GRMZM2G155216 // GRMZM2G384884 // GRMZM2G042347 // GRMZM2G168898 // GRMZM2G363429 // GRMZM2G014395 // GRMZM2G034471 // GRMZM5G830329 // GRMZM2G131525 // GRMZM2G350020
GO:0004601	F	peroxidase activity	6	751	329	39203	0.6	1	// GRMZM2G405581 // GRMZM2G405459 // GRMZM2G040638 // GRMZM2G129761 // GRMZM2G042347 // GRMZM2G131525
GO:0042578	F	phosphoric ester hydrolase activity	10	751	446	39203	0.36	1	// GRMZM2G051577 // GRMZM2G166297 // GRMZM2G124179 // GRMZM5G865943 // GRMZM2G371793 // GRMZM2G326270 // GRMZM2G017982 // GRMZM2G035134 // GRMZM2G053722 // GRMZM2G440459
GO:0008233	F	peptidase activity	17	751	1529	39203	0.99	1	// GRMZM2G066326 // GRMZM2G382581 // GRMZM2G035517 // GRMZM2G165969 // GRMZM2G081504 // GRMZM2G025491 // GRMZM2G468255 // GRMZM2G320206 // GRMZM2G152419 // GRMZM2G070455 // GRMZM2G108739 // GRMZM2G135970 // GRMZM2G108849 // GRMZM2G132032 // GRMZM2G133919 // GRMZM2G411333 // GRMZM2G059026
GO:0008234	F	cysteine-type peptidase activity	6	751	332	39203	0.61	1	// GRMZM2G066326 // GRMZM2G382581 // GRMZM2G468255 // GRMZM2G320206 // GRMZM2G108739 // GRMZM2G108849
GO:0051082	F	unfolded protein binding	10	751	319	39203	0.094	1	// GRMZM5G813217 // GRMZM2G049373 // GRMZM2G108259 // GRMZM2G099909 // GRMZM2G024668 // GRMZM2G535911 // GRMZM2G128248 // GRMZM2G112165 // AC203985.4_FG005 // GRMZM2G012631
GO:0043167	F	ion binding	129	751	6665	39203	0.46	1	// GRMZM2G106408 // GRMZM2G025387 // GRMZM2G090595 // GRMZM2G040638 // GRMZM2G053707 // GRMZM2G364612 // GRMZM2G405581 // GRMZM2G077809 // GRMZM2G407825 // GRMZM2G019799 // GRMZM2G113408 // GRMZM2G155216 // AC213654.3_FG001 // GRMZM2G346113 // AC209987.4_FG002 // GRMZM2G455243 // GRMZM2G038170 // GRMZM2G103465 // GRMZM2G006977 // GRMZM5G836222 // GRMZM2G056014 // GRMZM2G113033 // GRMZM2G171073 //…
GO:0030554	F	adenyl nucleotide binding	93	751	5398	39203	0.88	1	// GRMZM2G083580 // GRMZM2G024668 // GRMZM2G455243 // GRMZM2G303768 // GRMZM2G039934 // GRMZM2G407825 // GRMZM2G070252 // GRMZM2G019799 // GRMZM5G843537 // GRMZM2G064473 // GRMZM2G026131 // GRMZM2G310410 // GRMZM2G117250 // GRMZM2G112165 // GRMZM2G168416 // GRMZM2G406074 // GRMZM2G006977 // GRMZM5G852177 // GRMZM2G056014 // GRMZM2G400806 // GRMZM2G144420 // GRMZM2G006341 // GRMZM2G133764 // GRMZM…
GO:0015077	F	monovalent inorganic cation transmembrane transporter activity	6	751	329	39203	0.6	1	// GRMZM2G131575 // GRMZM2G090149 // GRMZM2G113408 // GRMZM2G005040 // GRMZM2G375116 // GRMZM2G028432
GO:0030234	F	enzyme regulator activity	8	751	552	39203	0.83	1	// GRMZM2G423898 // GRMZM2G025954 // GRMZM2G176495 // GRMZM2G022726 // GRMZM2G074857 // GRMZM5G892522 // GRMZM2G304548 // GRMZM2G053722
GO:0019842	F	vitamin binding	7	751	360	39203	0.54	1	// GRMZM2G119150 // GRMZM2G345717 // GRMZM2G152888 // GRMZM2G141810 // GRMZM2G175396 // GRMZM2G120563 // GRMZM2G143357
GO:0008270	F	zinc ion binding	52	751	3989	39203	1	1	// GRMZM2G111191 // GRMZM2G081577 // GRMZM2G138455 // GRMZM2G004422 // GRMZM5G893216 // GRMZM2G090595 // GRMZM2G064853 // GRMZM2G455243 // GRMZM2G053707 // GRMZM2G329159 // GRMZM2G462140 // GRMZM2G364612 // GRMZM2G031825 // GRMZM2G157933 // GRMZM2G074032 // GRMZM2G013936 // GRMZM2G175349 // GRMZM5G833747 // GRMZM2G044576 // GRMZM2G125867 // GRMZM5G864001 // GRMZM2G055037 // GRMZM2G113408 // GRMZM…
GO:0016614	F	oxidoreductase activity, acting on CH-OH group of donors	11	751	441	39203	0.23	1	// GRMZM2G443445 // GRMZM2G033515 // GRMZM2G413647 // AC203909.3_FG007 // GRMZM2G019799 // AC203909.3_FG003 // GRMZM2G175150 // GRMZM2G104546 // GRMZM2G363813 // GRMZM2G036759 // GRMZM2G334941
GO:0016616	F	oxidoreductase activity, acting on the CH-OH group of donors, NAD or NADP as acceptor	9	751	394	39203	0.35	1	// GRMZM2G443445 // GRMZM2G033515 // GRMZM2G413647 // AC203909.3_FG007 // AC203909.3_FG003 // GRMZM2G175150 // GRMZM2G104546 // GRMZM2G036759 // GRMZM2G334941
GO:0022804	F	active transmembrane transporter activity	22	751	825	39203	0.082	1	// GRMZM2G157157 // GRMZM2G136508 // GRMZM2G006977 // GRMZM2G174458 // GRMZM2G011592 // GRMZM2G102786 // GRMZM2G407825 // GRMZM2G363229 // GRMZM5G843537 // GRMZM2G064473 // GRMZM2G091228 // GRMZM2G357620 // AC234203.1_FG004 // GRMZM2G104730 // GRMZM2G120563 // GRMZM2G056014 // GRMZM2G144420 // GRMZM2G090149 // GRMZM2G161809 // GRMZM2G145446 // GRMZM2G035520 // GRMZM2G045704
GO:0019787	F	small conjugating protein ligase activity	5	751	324	39203	0.74	1	// GRMZM2G046848 // GRMZM2G156517 // GRMZM2G492252 // GRMZM2G018059 // GRMZM2G127690
GO:0043169	F	cation binding	129	751	6664	39203	0.46	1	// GRMZM2G106408 // GRMZM2G025387 // GRMZM2G090595 // GRMZM2G040638 // GRMZM2G053707 // GRMZM2G364612 // GRMZM2G405581 // GRMZM2G077809 // GRMZM2G407825 // GRMZM2G019799 // GRMZM2G113408 // GRMZM2G155216 // AC213654.3_FG001 // GRMZM2G346113 // AC209987.4_FG002 // GRMZM2G455243 // GRMZM2G038170 // GRMZM2G103465 // GRMZM2G006977 // GRMZM5G836222 // GRMZM2G056014 // GRMZM2G113033 // GRMZM2G171073 //…
GO:0016462	F	pyrophosphatase activity	40	751	1907	39203	0.3	1	// GRMZM2G083580 // GRMZM2G157157 // GRMZM5G843537 // GRMZM2G110509 // GRMZM2G165757 // GRMZM2G455243 // GRMZM5G819464 // GRMZM2G001160 // GRMZM2G091088 // GRMZM2G059026 // GRMZM2G102786 // GRMZM2G019621 // GRMZM2G407825 // GRMZM2G359230 // GRMZM2G113408 // GRMZM2G357620 // GRMZM2G091228 // GRMZM2G026131 // AC234203.1_FG004 // GRMZM2G065480 // GRMZM2G104730 // GRMZM2G406074 // GRMZM2G007038 // GR…
GO:0016829	F	lyase activity	8	751	655	39203	0.93	1	// GRMZM2G139624 // GRMZM2G113033 // GRMZM2G147955 // GRMZM2G074122 // GRMZM2G064302 // GRMZM2G141810 // GRMZM2G103152 // GRMZM2G341723
GO:0015297	F	antiporter activity	7	751	235	39203	0.17	1	// GRMZM2G174458 // GRMZM2G011592 // GRMZM2G363229 // GRMZM2G090149 // GRMZM2G161809 // GRMZM2G120563 // GRMZM2G064473
GO:0015291	F	secondary active transmembrane transporter activity	8	751	421	39203	0.56	1	// GRMZM2G174458 // GRMZM2G011592 // GRMZM2G363229 // GRMZM2G090149 // GRMZM2G161809 // GRMZM2G120563 // GRMZM2G064473 // GRMZM2G091228
GO:0003723	F	RNA binding	17	751	1088	39203	0.83	1	// GRMZM2G449123 // GRMZM2G702725 // GRMZM2G158835 // GRMZM2G077991 // GRMZM2G032104 // GRMZM2G087165 // GRMZM2G113096 // GRMZM2G445057 // GRMZM2G175562 // GRMZM2G113408 // GRMZM2G082707 // GRMZM2G168149 // GRMZM2G077851 // GRMZM2G364597 // GRMZM2G346113 // AC199526.5_FG003 // GRMZM2G013761
GO:0004871	F	signal transducer activity	5	751	1377	39203	1	1	// GRMZM2G409974 // GRMZM2G150337 // GRMZM2G176506 // GRMZM2G098474 // GRMZM2G148056
GO:0050662	F	coenzyme binding	16	751	734	39203	0.34	1	// GRMZM2G078480 // AC193500.3_FG003 // GRMZM2G080044 // GRMZM2G413647 // GRMZM2G034152 // GRMZM2G019799 // AC203909.3_FG007 // GRMZM2G179981 // GRMZM2G468439 // AC203909.3_FG003 // GRMZM2G009681 // GRMZM2G033515 // GRMZM2G104546 // GRMZM2G143357 // GRMZM2G462140 // GRMZM2G000236
GO:0050660	F	FAD binding	8	751	265	39203	0.14	1	// AC193500.3_FG003 // AC203909.3_FG007 // GRMZM2G034152 // GRMZM2G080044 // GRMZM2G019799 // AC203909.3_FG003 // GRMZM2G143357 // GRMZM2G462140
GO:0030528	F	transcription regulator activity	33	751	2233	39203	0.95	1	// GRMZM2G046885 // GRMZM2G125653 // GRMZM2G003514 // GRMZM2G125243 // GRMZM2G521481 // GRMZM2G148056 // GRMZM2G098474 // GRMZM2G123140 // GRMZM2G009530 // GRMZM2G044576 // GRMZM2G093595 // GRMZM2G120320 // GRMZM2G056600 // GRMZM2G092137 // AC209257.4_FG006 // GRMZM2G101058 // GRMZM2G097059 // GRMZM2G097349 // GRMZM2G026157 // GRMZM2G452178 // GRMZM2G169149 // GRMZM2G409974 // GRMZM2G361842 // GR…
GO:0005198	F	structural molecule activity	24	751	2019	39203	1	1	// GRMZM2G091383 // GRMZM2G302712 // GRMZM2G360677 // GRMZM2G028216 // GRMZM2G139900 // GRMZM2G087165 // GRMZM2G102891 // GRMZM2G163561 // GRMZM2G145308 // GRMZM2G074085 // GRMZM2G077991 // GRMZM2G149649 // GRMZM2G171181 // GRMZM2G093574 // GRMZM2G082707 // GRMZM2G168149 // GRMZM2G394122 // GRMZM2G379128 // GRMZM2G149975 // GRMZM2G027728 // GRMZM2G077851 // GRMZM2G032564 // GRMZM2G326066 // GRMZM…
GO:0046914	F	transition metal ion binding	86	751	5507	39203	0.98	1	// GRMZM2G106408 // GRMZM2G090595 // GRMZM2G040638 // GRMZM2G053707 // GRMZM2G364612 // GRMZM2G077809 // GRMZM2G019799 // GRMZM2G113408 // AC213654.3_FG001 // GRMZM2G346113 // AC209987.4_FG002 // GRMZM2G455243 // GRMZM2G103465 // GRMZM5G836222 // GRMZM2G171073 // GRMZM5G833389 // GRMZM2G076225 // GRMZM5G893216 // GRMZM2G329159 // GRMZM2G031825 // GRMZM2G175349 // GRMZM2G125867 // GRMZM2G064853 //…
GO:0005886	C	plasma membrane	92	751	149	39203	9.6e-95	3.4e-92	// GRMZM2G024668 // GRMZM2G063850 // GRMZM2G086496 // GRMZM2G316232 // GRMZM2G179981 // GRMZM5G843537 // GRMZM2G120652 // GRMZM2G074085 // GRMZM2G112165 // GRMZM2G168416 // GRMZM2G006977 // GRMZM2G122937 // GRMZM2G392975 // GRMZM2G056014 // GRMZM5G833389 // GRMZM2G032564 // GRMZM2G062471 // GRMZM2G168898 // GRMZM2G045704 // GRMZM2G091155 // GRMZM2G005633 // GRMZM2G050159 // GRMZM2G174458 // GRMZM…
GO:0044444	C	cytoplasmic part	220	751	2678	39203	3.2e-75	5.6e-73	// GRMZM2G084515 // GRMZM2G168149 // GRMZM2G024451 // GRMZM2G033359 // GRMZM2G099909 // GRMZM2G493395 // GRMZM2G063850 // GRMZM2G135970 // GRMZM2G006977 // GRMZM2G360677 // GRMZM2G421234 // GRMZM2G122937 // GRMZM2G033375 // GRMZM2G181259 // GRMZM2G139900 // GRMZM2G179981 // GRMZM2G113408 // GRMZM2G107556 // GRMZM2G155216 // GRMZM2G167892 // GRMZM2G024668 // GRMZM2G120652 // GRMZM2G064473 // GRMZM…
GO:0005737	C	cytoplasm	236	751	3593	39203	1e-63	1.2e-61	// GRMZM2G084515 // GRMZM2G168149 // GRMZM2G024451 // GRMZM2G012631 // GRMZM2G033359 // GRMZM2G099909 // GRMZM2G493395 // GRMZM2G063850 // GRMZM2G135970 // GRMZM2G006977 // GRMZM2G360677 // GRMZM2G421234 // GRMZM2G122937 // GRMZM2G033375 // GRMZM2G181259 // GRMZM2G139900 // GRMZM2G179981 // GRMZM2G113408 // GRMZM2G107556 // GRMZM2G155216 // GRMZM2G167892 // GRMZM2G024668 // GRMZM2G120652 // GRMZM…
GO:0043231	C	intracellular membrane-bounded organelle	243	751	4093	39203	5.3e-58	4.7e-56	// GRMZM2G084515 // GRMZM2G024451 // GRMZM2G003514 // GRMZM2G033359 // GRMZM2G455243 // GRMZM2G493395 // GRMZM2G361842 // GRMZM2G129761 // GRMZM2G063850 // GRMZM2G137525 // GRMZM2G421234 // GRMZM2G122937 // GRMZM2G181259 // GRMZM2G316232 // GRMZM2G139900 // GRMZM2G179981 // GRMZM2G113408 // GRMZM2G107556 // GRMZM2G155216 // GRMZM2G167892 // GRMZM2G024668 // GRMZM2G120652 // GRMZM2G064473 // GRMZM…
GO:0043227	C	membrane-bounded organelle	243	751	4127	39203	2.3e-57	1.6e-55	// GRMZM2G084515 // GRMZM2G024451 // GRMZM2G003514 // GRMZM2G033359 // GRMZM2G455243 // GRMZM2G493395 // GRMZM2G361842 // GRMZM2G129761 // GRMZM2G063850 // GRMZM2G137525 // GRMZM2G421234 // GRMZM2G122937 // GRMZM2G181259 // GRMZM2G316232 // GRMZM2G139900 // GRMZM2G179981 // GRMZM2G113408 // GRMZM2G107556 // GRMZM2G155216 // GRMZM2G167892 // GRMZM2G024668 // GRMZM2G120652 // GRMZM2G064473 // GRMZM…
GO:0005829	C	cytosol	54	751	160	39203	1.2e-44	6.7e-43	// GRMZM2G024451 // GRMZM2G019799 // GRMZM2G091155 // GRMZM2G099909 // GRMZM2G063850 // GRMZM2G108849 // GRMZM2G031825 // GRMZM2G012631 // GRMZM2G302712 // GRMZM2G360677 // GRMZM2G033375 // GRMZM2G181259 // GRMZM2G139900 // GRMZM2G179981 // GRMZM2G064302 // GRMZM2G072315 // GRMZM2G163561 // GRMZM2G024668 // GRMZM2G003385 // GRMZM2G120652 // GRMZM2G072855 // GRMZM2G091228 // GRMZM5G898915 // GRMZM…
GO:0005773	C	vacuole	34	751	38	39203	2e-39	1e-37	// GRMZM2G025387 // GRMZM2G077851 // GRMZM2G110509 // GRMZM2G415793 // GRMZM2G108849 // GRMZM2G036908 // GRMZM2G029219 // GRMZM2G066326 // GRMZM2G011592 // GRMZM5G865943 // GRMZM2G181259 // GRMZM2G160460 // GRMZM2G099483 // GRMZM2G167497 // GRMZM2G072855 // GRMZM2G357620 // GRMZM2G152891 // GRMZM2G042797 // AC234203.1_FG004 // GRMZM2G344279 // GRMZM2G350020 // GRMZM2G012631 // GRMZM2G122937 // GR…
GO:0043229	C	intracellular organelle	262	751	6224	39203	2.1e-36	8.2e-35	// GRMZM2G084515 // GRMZM2G168149 // GRMZM2G024451 // GRMZM2G003514 // GRMZM2G033359 // GRMZM2G455243 // GRMZM2G493395 // GRMZM2G361842 // GRMZM2G129761 // GRMZM2G063850 // GRMZM2G135970 // GRMZM2G006977 // GRMZM2G360677 // GRMZM2G421234 // GRMZM2G122937 // GRMZM2G181259 // GRMZM2G316232 // GRMZM2G139900 // GRMZM2G179981 // GRMZM2G113408 // GRMZM2G107556 // GRMZM2G155216 // GRMZM2G167892 // GRMZM…
GO:0043226	C	organelle	262	751	6224	39203	2.1e-36	8.2e-35	// GRMZM2G084515 // GRMZM2G168149 // GRMZM2G024451 // GRMZM2G003514 // GRMZM2G033359 // GRMZM2G455243 // GRMZM2G493395 // GRMZM2G361842 // GRMZM2G129761 // GRMZM2G063850 // GRMZM2G135970 // GRMZM2G006977 // GRMZM2G360677 // GRMZM2G421234 // GRMZM2G122937 // GRMZM2G181259 // GRMZM2G316232 // GRMZM2G139900 // GRMZM2G179981 // GRMZM2G113408 // GRMZM2G107556 // GRMZM2G155216 // GRMZM2G167892 // GRMZM…
GO:0044422	C	organelle part	126	751	1764	39203	1.3e-35	4.1e-34	// GRMZM2G084515 // GRMZM2G168149 // GRMZM2G024668 // GRMZM2G455243 // GRMZM2G360677 // GRMZM2G421234 // GRMZM2G316232 // GRMZM2G139900 // GRMZM2G113408 // GRMZM2G155216 // GRMZM2G064473 // GRMZM2G026131 // GRMZM2G074085 // GRMZM2G026157 // GRMZM2G003565 // AC234203.1_FG004 // GRMZM2G373420 // GRMZM2G093574 // GRMZM2G112165 // GRMZM2G168416 // GRMZM2G145133 // GRMZM2G012119 // GRMZM2G392975 // GR…
GO:0044446	C	intracellular organelle part	126	751	1764	39203	1.3e-35	4.1e-34	// GRMZM2G084515 // GRMZM2G168149 // GRMZM2G024668 // GRMZM2G455243 // GRMZM2G360677 // GRMZM2G421234 // GRMZM2G316232 // GRMZM2G139900 // GRMZM2G113408 // GRMZM2G155216 // GRMZM2G064473 // GRMZM2G026131 // GRMZM2G074085 // GRMZM2G026157 // GRMZM2G003565 // AC234203.1_FG004 // GRMZM2G373420 // GRMZM2G093574 // GRMZM2G112165 // GRMZM2G168416 // GRMZM2G145133 // GRMZM2G012119 // GRMZM2G392975 // GR…
GO:0044424	C	intracellular part	299	751	7930	39203	6.1e-34	1.8e-32	// GRMZM2G084515 // GRMZM2G168149 // GRMZM2G024451 // GRMZM2G003514 // GRMZM2G033359 // GRMZM2G455243 // GRMZM2G099909 // GRMZM2G493395 // GRMZM2G361842 // GRMZM2G129761 // GRMZM2G063850 // GRMZM2G135970 // GRMZM2G145085 // GRMZM2G006977 // GRMZM2G360677 // GRMZM2G421234 // GRMZM2G104074 // GRMZM2G122937 // GRMZM2G033375 // GRMZM2G181259 // GRMZM2G316232 // GRMZM2G139900 // GRMZM2G179981 // GRMZM…
GO:0005622	C	intracellular	310	751	9403	39203	3.8e-25	1e-23	// GRMZM2G162537 // GRMZM2G084515 // GRMZM2G168149 // GRMZM2G024451 // GRMZM2G003514 // GRMZM2G033359 // GRMZM2G090595 // GRMZM2G455243 // GRMZM2G099909 // GRMZM2G493395 // GRMZM2G361842 // GRMZM2G129761 // GRMZM2G063850 // GRMZM2G135970 // GRMZM2G145085 // GRMZM2G006977 // GRMZM2G360677 // GRMZM2G421234 // GRMZM2G104074 // GRMZM2G012119 // GRMZM2G033375 // GRMZM2G181259 // GRMZM2G316232 // GRMZM…
GO:0016020	C	membrane	207	751	5307	39203	1.4e-23	3.6e-22	// GRMZM2G084515 // GRMZM5G843537 // GRMZM2G024668 // GRMZM2G034815 // GRMZM2G375116 // GRMZM2G063850 // GRMZM2G005633 // GRMZM2G064831 // GRMZM2G120563 // GRMZM2G039345 // GRMZM2G360677 // GRMZM2G421234 // GRMZM2G065203 // GRMZM2G316232 // GRMZM2G407825 // GRMZM2G070252 // GRMZM2G179981 // GRMZM2G379898 // GRMZM2G134020 // GRMZM2G113408 // GRMZM2G155216 // GRMZM2G030165 // GRMZM2G120652 // GRMZM…
GO:0044464	C	cell part	400	751	13914	39203	6e-23	1.3e-21	// GRMZM2G162537 // GRMZM2G084515 // GRMZM2G024451 // GRMZM2G003514 // GRMZM2G090595 // GRMZM2G137525 // GRMZM2G064831 // GRMZM2G360677 // GRMZM2G407825 // GRMZM2G179981 // GRMZM2G099231 // GRMZM2G097059 // GRMZM2G079889 // GRMZM2G015727 // GRMZM2G087955 // GRMZM2G373420 // GRMZM2G093574 // GRMZM2G112165 // GRMZM2G145133 // GRMZM2G394122 // GRMZM2G122937 // GRMZM2G083749 // GRMZM2G392975 // GRMZM…
GO:0005623	C	cell	400	751	13914	39203	6e-23	1.3e-21	// GRMZM2G162537 // GRMZM2G084515 // GRMZM2G024451 // GRMZM2G003514 // GRMZM2G090595 // GRMZM2G137525 // GRMZM2G064831 // GRMZM2G360677 // GRMZM2G407825 // GRMZM2G179981 // GRMZM2G099231 // GRMZM2G097059 // GRMZM2G079889 // GRMZM2G015727 // GRMZM2G087955 // GRMZM2G373420 // GRMZM2G093574 // GRMZM2G112165 // GRMZM2G145133 // GRMZM2G394122 // GRMZM2G122937 // GRMZM2G083749 // GRMZM2G392975 // GRMZM…
GO:0070013	C	intracellular organelle lumen	35	751	189	39203	6.8e-22	1.3e-20	// GRMZM2G110509 // GRMZM2G110233 // GRMZM2G108259 // GRMZM2G165969 // GRMZM2G332838 // GRMZM2G316232 // GRMZM2G360389 // GRMZM2G112912 // GRMZM2G087165 // GRMZM2G061135 // GRMZM2G113408 // GRMZM2G163561 // GRMZM2G024668 // GRMZM2G072855 // GRMZM2G063896 // GRMZM2G091383 // GRMZM2G113033 // GRMZM2G361842 // GRMZM2G114399 // GRMZM2G026157 // GRMZM2G171181 // GRMZM2G344279 // GRMZM2G112165 // GRMZM…
GO:0043233	C	organelle lumen	35	751	189	39203	6.8e-22	1.3e-20	// GRMZM2G110509 // GRMZM2G110233 // GRMZM2G108259 // GRMZM2G165969 // GRMZM2G332838 // GRMZM2G316232 // GRMZM2G360389 // GRMZM2G112912 // GRMZM2G087165 // GRMZM2G061135 // GRMZM2G113408 // GRMZM2G163561 // GRMZM2G024668 // GRMZM2G072855 // GRMZM2G063896 // GRMZM2G091383 // GRMZM2G113033 // GRMZM2G361842 // GRMZM2G114399 // GRMZM2G026157 // GRMZM2G171181 // GRMZM2G344279 // GRMZM2G112165 // GRMZM…
GO:0031967	C	organelle envelope	41	751	310	39203	1.5e-20	2.8e-19	// GRMZM2G109967 // GRMZM2G157157 // AC215201.3_FG005 // GRMZM2G091155 // GRMZM2G164131 // GRMZM2G003765 // GRMZM2G415793 // GRMZM2G102382 // GRMZM2G414460 // GRMZM2G462140 // GRMZM2G152419 // GRMZM2G421234 // GRMZM2G028216 // GRMZM2G156174 // GRMZM5G833747 // GRMZM2G113408 // GRMZM2G105085 // GRMZM2G383088 // GRMZM2G155216 // GRMZM2G003385 // GRMZM2G064473 // GRMZM2G149105 // GRMZM2G158835 // GR…
GO:0005911	C	cell-cell junction	18	751	24	39203	1.6e-20	2.8e-19	// GRMZM2G392975 // GRMZM2G110233 // GRMZM2G009282 // GRMZM2G074085 // GRMZM2G316232 // GRMZM2G360389 // GRMZM2G072315 // GRMZM2G179981 // GRMZM2G379898 // GRMZM5G833389 // GRMZM2G344279 // GRMZM2G061777 // GRMZM2G062471 // GRMZM2G356938 // GRMZM2G168898 // GRMZM2G333861 // GRMZM2G072855 // GRMZM5G865943
GO:0031974	C	membrane-enclosed lumen	35	751	214	39203	2.4e-20	4e-19	// GRMZM2G110509 // GRMZM2G110233 // GRMZM2G108259 // GRMZM2G165969 // GRMZM2G332838 // GRMZM2G316232 // GRMZM2G360389 // GRMZM2G112912 // GRMZM2G087165 // GRMZM2G061135 // GRMZM2G113408 // GRMZM2G163561 // GRMZM2G024668 // GRMZM2G072855 // GRMZM2G063896 // GRMZM2G091383 // GRMZM2G113033 // GRMZM2G361842 // GRMZM2G114399 // GRMZM2G026157 // GRMZM2G171181 // GRMZM2G344279 // GRMZM2G112165 // GRMZM…
GO:0044428	C	nuclear part	36	751	233	39203	3.6e-20	5.7e-19	// GRMZM2G110509 // GRMZM2G091155 // GRMZM2G110233 // GRMZM2G165969 // GRMZM2G156174 // GRMZM2G316232 // GRMZM2G360389 // GRMZM2G112912 // GRMZM2G061135 // GRMZM2G113408 // GRMZM2G163561 // GRMZM2G024668 // GRMZM2G072855 // GRMZM2G063896 // GRMZM2G091383 // GRMZM2G332838 // GRMZM2G361842 // GRMZM2G026157 // GRMZM2G171181 // GRMZM2G344279 // GRMZM2G112165 // GRMZM2G168149 // GRMZM2G012631 // GRMZM…
GO:0031981	C	nuclear lumen	30	751	150	39203	8.8e-20	1.3e-18	// GRMZM2G110509 // GRMZM2G110233 // GRMZM2G165969 // GRMZM2G316232 // GRMZM2G360389 // GRMZM2G112912 // GRMZM2G061135 // GRMZM2G113408 // GRMZM2G163561 // GRMZM2G024668 // GRMZM2G072855 // GRMZM2G063896 // GRMZM2G091383 // GRMZM2G332838 // GRMZM2G361842 // GRMZM2G026157 // GRMZM2G171181 // GRMZM2G344279 // GRMZM2G112165 // GRMZM2G168149 // GRMZM2G012631 // GRMZM2G057608 // GRMZM2G168416 // GRMZM…
GO:0031975	C	envelope	42	751	359	39203	3.1e-19	4.6e-18	// GRMZM2G109967 // GRMZM2G157157 // AC215201.3_FG005 // GRMZM2G091155 // GRMZM2G164131 // GRMZM2G003765 // GRMZM2G415793 // GRMZM2G102382 // GRMZM2G414460 // GRMZM2G462140 // GRMZM2G152419 // GRMZM2G421234 // GRMZM2G028216 // GRMZM2G156174 // GRMZM5G833747 // GRMZM2G113408 // GRMZM2G105085 // GRMZM2G383088 // GRMZM2G155216 // GRMZM2G003385 // GRMZM2G064473 // GRMZM2G149105 // GRMZM2G158835 // GR…
GO:0031090	C	organelle membrane	46	751	456	39203	1.3e-18	1.8e-17	// GRMZM2G030880 // GRMZM2G157157 // GRMZM2G164131 // GRMZM2G415793 // GRMZM2G102382 // GRMZM2G152419 // GRMZM2G462140 // GRMZM2G012631 // GRMZM2G029219 // GRMZM2G039345 // GRMZM2G421234 // GRMZM5G833747 // GRMZM2G113408 // GRMZM2G034243 // GRMZM2G105085 // GRMZM2G155216 // GRMZM2G099483 // GRMZM2G167497 // GRMZM2G072855 // GRMZM2G357620 // GRMZM2G149105 // GRMZM2G158835 // GRMZM2G113033 // GRMZM…
GO:0030054	C	cell junction	18	751	35	39203	2.5e-18	3.3e-17	// GRMZM2G392975 // GRMZM2G110233 // GRMZM2G009282 // GRMZM2G074085 // GRMZM2G316232 // GRMZM2G360389 // GRMZM2G072315 // GRMZM2G179981 // GRMZM2G379898 // GRMZM5G833389 // GRMZM2G344279 // GRMZM2G061777 // GRMZM2G062471 // GRMZM2G356938 // GRMZM2G168898 // GRMZM2G333861 // GRMZM2G072855 // GRMZM5G865943
GO:0005739	C	mitochondrion	38	751	354	39203	2.1e-16	2.7e-15	// GRMZM2G109967 // GRMZM2G024668 // GRMZM2G110509 // GRMZM2G091155 // GRMZM2G012413 // GRMZM2G383088 // GRMZM2G462140 // GRMZM2G012631 // GRMZM2G421234 // GRMZM2G065203 // GRMZM2G107556 // GRMZM5G833747 // GRMZM2G087165 // GRMZM2G113408 // GRMZM2G115047 // GRMZM2G105085 // GRMZM2G155216 // AC215201.3_FG005 // GRMZM2G003385 // GRMZM2G156516 // GRMZM2G149105 // GRMZM2G047800 // GRMZM2G080044 // GR…
GO:0009579	C	thylakoid	24	751	122	39203	5.9e-16	7.3e-15	// GRMZM2G030880 // GRMZM2G039345 // AC215201.3_FG005 // GRMZM2G415793 // GRMZM2G332838 // GRMZM2G034243 // GRMZM2G155216 // GRMZM2G072855 // GRMZM2G063896 // GRMZM2G383088 // GRMZM2G158835 // GRMZM2G113033 // GRMZM2G114399 // GRMZM2G001956 // GRMZM2G373420 // GRMZM2G012119 // GRMZM2G074040 // GRMZM2G025954 // GRMZM2G033208 // GRMZM5G825090 // GRMZM2G072174 // GRMZM2G018275 // GRMZM2G175562 // AC…
GO:0005618	C	cell wall	26	751	172	39203	9.6e-15	1.1e-13	// GRMZM2G148167 // GRMZM2G024668 // GRMZM2G091155 // GRMZM2G379898 // GRMZM2G005633 // GRMZM2G039588 // GRMZM2G368151 // GRMZM2G066326 // GRMZM2G316232 // GRMZM2G388684 // GRMZM2G061135 // GRMZM2G099483 // GRMZM2G132032 // GRMZM2G091383 // GRMZM2G074085 // GRMZM2G113033 // GRMZM2G080044 // GRMZM2G344279 // GRMZM2G168149 // GRMZM2G168898 // GRMZM2G012631 // GRMZM2G110233 // GRMZM2G009282 // GRMZM…
GO:0042651	C	thylakoid membrane	15	751	34	39203	9.8e-15	1.1e-13	// GRMZM2G030880 // GRMZM2G074040 // GRMZM2G039345 // GRMZM2G113033 // GRMZM2G114399 // GRMZM2G033208 // GRMZM2G001956 // GRMZM5G825090 // GRMZM2G373420 // GRMZM2G034243 // GRMZM2G155216 // GRMZM2G415793 // GRMZM2G018275 // GRMZM2G175562 // GRMZM2G158835
GO:0030312	C	external encapsulating structure	27	751	219	39203	2.5e-13	2.8e-12	// GRMZM2G148167 // GRMZM2G024668 // GRMZM2G091155 // GRMZM2G379898 // GRMZM2G005633 // GRMZM2G039588 // GRMZM2G368151 // GRMZM2G066326 // GRMZM2G316232 // GRMZM2G388684 // GRMZM2G061135 // GRMZM2G099483 // GRMZM2G132032 // GRMZM2G091383 // GRMZM2G074085 // GRMZM2G113033 // GRMZM2G080044 // GRMZM2G344279 // GRMZM2G168149 // GRMZM2G168898 // GRMZM2G012631 // GRMZM2G110233 // GRMZM2G009282 // GRMZM…
GO:0044459	C	plasma membrane part	21	751	130	39203	1.1e-12	1.3e-11	// GRMZM2G392975 // GRMZM2G110233 // GRMZM2G009282 // GRMZM2G074085 // GRMZM2G322618 // GRMZM2G316232 // GRMZM2G360389 // GRMZM2G072315 // GRMZM2G179981 // GRMZM2G379898 // GRMZM5G833389 // GRMZM2G344279 // GRMZM2G061777 // GRMZM5G824920 // GRMZM2G174807 // GRMZM2G062471 // GRMZM2G356938 // GRMZM2G168898 // GRMZM2G333861 // GRMZM2G072855 // GRMZM5G865943
GO:0009505	C	plant-type cell wall	10	751	11	39203	1.5e-12	1.6e-11	// GRMZM2G148167 // GRMZM2G146192 // GRMZM2G076225 // GRMZM2G099483 // GRMZM2G379898 // GRMZM2G005633 // GRMZM2G009282 // GRMZM2G039588 // GRMZM2G132032 // GRMZM2G368151
GO:0044436	C	thylakoid part	16	751	67	39203	3.3e-12	3.4e-11	// GRMZM2G030880 // GRMZM2G074040 // GRMZM2G039345 // GRMZM2G113033 // GRMZM2G114399 // GRMZM2G033208 // GRMZM2G001956 // GRMZM5G825090 // GRMZM2G373420 // GRMZM2G034243 // GRMZM2G072174 // GRMZM2G155216 // GRMZM2G415793 // GRMZM2G018275 // GRMZM2G175562 // GRMZM2G158835
GO:0044445	C	cytosolic part	22	751	160	39203	5.9e-12	5.9e-11	// GRMZM2G099909 // GRMZM2G302712 // GRMZM2G360677 // GRMZM2G139900 // GRMZM2G064302 // GRMZM2G163561 // GRMZM2G091383 // GRMZM2G074085 // GRMZM2G077991 // GRMZM2G535911 // GRMZM2G171181 // GRMZM2G093574 // GRMZM2G344279 // AC203985.4_FG005 // GRMZM2G168149 // GRMZM2G057608 // GRMZM2G027728 // GRMZM2G077851 // GRMZM2G032564 // GRMZM2G326066 // GRMZM2G072315 // GRMZM2G123371
GO:0044425	C	membrane part	98	751	2684	39203	1.6e-09	1.5e-08	// GRMZM2G084515 // GRMZM2G379898 // GRMZM2G086496 // GRMZM2G099984 // GRMZM2G139624 // GRMZM2G421234 // GRMZM2G316232 // GRMZM2G407825 // GRMZM2G179981 // GRMZM5G843537 // GRMZM2G155216 // GRMZM2G064473 // GRMZM2G079889 // GRMZM2G074085 // AC234203.1_FG004 // GRMZM2G006977 // GRMZM2G134020 // GRMZM2G392975 // GRMZM2G056014 // GRMZM2G113800 // GRMZM2G144420 // GRMZM2G176774 // GRMZM2G167283 // GR…
GO:0034357	C	photosynthetic membrane	16	751	112	39203	2.7e-09	2.6e-08	// GRMZM2G030880 // GRMZM2G074040 // GRMZM2G039345 // GRMZM2G113033 // GRMZM2G114399 // GRMZM2G033208 // GRMZM2G001956 // GRMZM5G825090 // GRMZM2G373420 // GRMZM2G034243 // GRMZM2G072174 // GRMZM2G155216 // GRMZM2G415793 // GRMZM2G018275 // GRMZM2G175562 // GRMZM2G158835
GO:0033279	C	ribosomal subunit	19	751	171	39203	4.1e-09	3.8e-08	// GRMZM2G360677 // GRMZM2G057608 // GRMZM2G074085 // GRMZM2G077991 // GRMZM2G091383 // GRMZM2G139900 // GRMZM2G171181 // GRMZM2G087165 // GRMZM2G027728 // GRMZM2G093574 // GRMZM2G344279 // GRMZM2G032564 // GRMZM2G326066 // GRMZM2G072315 // GRMZM2G163561 // GRMZM2G168149 // GRMZM2G077851 // GRMZM2G302712 // GRMZM2G145308
GO:0048046	C	apoplast	16	751	126	39203	1.3e-08	1.1e-07	// GRMZM5G898915 // GRMZM2G146192 // GRMZM2G009282 // GRMZM2G113033 // AC215201.3_FG005 // GRMZM2G388684 // GRMZM5G833389 // GRMZM2G133919 // GRMZM2G005633 // GRMZM2G155216 // GRMZM2G024668 // GRMZM2G003385 // GRMZM2G012631 // GRMZM2G333861 // GRMZM2G175562 // GRMZM2G462140
GO:0070469	C	respiratory chain	5	751	6	39203	9.7e-07	8.3e-06	// GRMZM2G113408 // GRMZM2G421234 // GRMZM2G462140 // GRMZM2G149105 // AC196156.3_FG003
GO:0005746	C	mitochondrial respiratory chain	5	751	6	39203	9.7e-07	8.3e-06	// GRMZM2G113408 // GRMZM2G421234 // GRMZM2G462140 // GRMZM2G149105 // AC196156.3_FG003
GO:0015934	C	large ribosomal subunit	10	751	72	39203	3.3e-06	2.7e-05	// GRMZM2G074085 // GRMZM2G077991 // GRMZM2G171181 // GRMZM2G027728 // GRMZM2G077851 // GRMZM2G344279 // GRMZM2G032564 // GRMZM2G326066 // GRMZM2G072315 // GRMZM2G302712
GO:0005783	C	endoplasmic reticulum	17	751	230	39203	5.3e-06	4.3e-05	// GRMZM2G108259 // GRMZM2G056014 // GRMZM2G008647 // GRMZM2G065635 // GRMZM2G092442 // GRMZM2G480074 // GRMZM2G152888 // GRMZM2G181456 // GRMZM2G121683 // GRMZM2G044096 // GRMZM2G006977 // GRMZM2G167892 // GRMZM2G135970 // GRMZM2G067277 // GRMZM2G104626 // GRMZM2G117746 // GRMZM2G125552
GO:0005794	C	Golgi apparatus	13	751	138	39203	6.1e-06	4.9e-05	// GRMZM2G084515 // GRMZM5G833406 // GRMZM2G176774 // GRMZM2G179981 // GRMZM2G091155 // GRMZM2G181456 // GRMZM2G112165 // GRMZM5G812228 // GRMZM2G034631 // GRMZM2G012631 // GRMZM2G480074 // GRMZM2G357620 // GRMZM2G436429
GO:0044455	C	mitochondrial membrane part	7	751	40	39203	2.6e-05	0.00021	// GRMZM2G421234 // GRMZM2G149105 // GRMZM2G080044 // AC196156.3_FG003 // GRMZM2G113408 // GRMZM2G339503 // GRMZM2G462140
GO:0005777	C	peroxisome	6	751	33	39203	8.3e-05	0.00062	// GRMZM2G147884 // GRMZM2G035243 // GRMZM2G125140 // GRMZM2G120539 // GRMZM2G072658 // GRMZM2G062357
GO:0042579	C	microbody	6	751	33	39203	8.3e-05	0.00062	// GRMZM2G147884 // GRMZM2G035243 // GRMZM2G125140 // GRMZM2G120539 // GRMZM2G072658 // GRMZM2G062357
GO:0005634	C	nucleus	91	751	3212	39203	0.00016	0.0012	// GRMZM2G003514 // GRMZM2G024668 // GRMZM2G455243 // GRMZM2G129761 // GRMZM2G063850 // GRMZM2G137525 // GRMZM2G316232 // GRMZM2G139900 // GRMZM2G113408 // GRMZM2G121309 // GRMZM2G099231 // GRMZM2G097059 // GRMZM2G313737 // GRMZM2G026157 // GRMZM2G171181 // GRMZM2G087955 // GRMZM2G112165 // GRMZM2G371033 // GRMZM2G452178 // GRMZM2G168416 // GRMZM2G072115 // GRMZM2G171073 // GRMZM2G032564 // GRMZM…
GO:0015935	C	small ribosomal subunit	9	751	100	39203	0.00022	0.0016	// GRMZM2G360677 // GRMZM2G057608 // GRMZM2G091383 // GRMZM2G139900 // GRMZM2G087165 // GRMZM2G093574 // GRMZM2G163561 // GRMZM2G168149 // GRMZM2G145308
GO:0031224	C	intrinsic to membrane	66	751	2183	39203	0.00025	0.0018	// GRMZM2G064898 // GRMZM2G017365 // GRMZM2G084515 // GRMZM2G036564 // GRMZM2G136508 // GRMZM2G333069 // GRMZM2G455124 // GRMZM2G109967 // GRMZM2G040309 // GRMZM2G086496 // GRMZM2G099984 // GRMZM2G083526 // GRMZM2G162295 // GRMZM2G110145 // GRMZM2G029219 // GRMZM2G078373 // GRMZM2G084806 // GRMZM2G169363 // GRMZM2G160460 // GRMZM2G407825 // GRMZM2G156174 // GRMZM2G134020 // GRMZM5G843537 // GRMZM…
GO:0019866	C	organelle inner membrane	13	751	212	39203	0.00037	0.0025	// GRMZM2G327686 // GRMZM2G149105 // GRMZM2G152419 // GRMZM2G421234 // GRMZM5G833747 // GRMZM2G080044 // AC196156.3_FG003 // GRMZM2G113408 // GRMZM2G138258 // GRMZM2G164131 // GRMZM2G008859 // GRMZM5G801241 // GRMZM2G462140
GO:0016021	C	integral to membrane	63	751	2156	39203	0.00081	0.0055	// GRMZM2G064898 // GRMZM2G017365 // GRMZM2G084515 // GRMZM2G036564 // GRMZM2G136508 // GRMZM2G333069 // GRMZM2G455124 // GRMZM2G109967 // GRMZM2G040309 // GRMZM2G086496 // GRMZM2G099984 // GRMZM2G083526 // GRMZM2G162295 // GRMZM2G110145 // GRMZM2G029219 // GRMZM2G078373 // GRMZM2G084806 // GRMZM2G169363 // GRMZM2G160460 // GRMZM2G407825 // GRMZM2G156174 // GRMZM2G134020 // GRMZM5G843537 // GRMZM…
GO:0005576	C	extracellular region	22	751	583	39203	0.0028	0.018	// AC215201.3_FG005 // GRMZM2G040638 // GRMZM2G005633 // GRMZM2G462140 // GRMZM2G333861 // GRMZM2G388684 // GRMZM2G155216 // GRMZM2G024668 // GRMZM2G003385 // GRMZM2G304548 // GRMZM5G898915 // GRMZM2G113033 // GRMZM2G012631 // GRMZM2G133919 // GRMZM2G009282 // GRMZM2G059785 // GRMZM5G833389 // GRMZM2G095968 // GRMZM2G119494 // GRMZM2G146192 // GRMZM2G175562 // GRMZM2G031261
GO:0044429	C	mitochondrial part	13	751	309	39203	0.0085	0.055	// GRMZM2G421234 // GRMZM2G149105 // GRMZM5G833747 // AC196156.3_FG003 // GRMZM2G080044 // GRMZM2G087165 // GRMZM5G833389 // GRMZM2G113408 // GRMZM2G339503 // GRMZM2G105085 // GRMZM2G003385 // GRMZM5G801241 // GRMZM2G462140
GO:0005740	C	mitochondrial envelope	12	751	280	39203	0.0098	0.063	// GRMZM2G421234 // GRMZM2G149105 // GRMZM5G833747 // GRMZM2G080044 // AC196156.3_FG003 // GRMZM5G833389 // GRMZM2G113408 // GRMZM2G339503 // GRMZM2G105085 // GRMZM2G003385 // GRMZM5G801241 // GRMZM2G462140
GO:0031966	C	mitochondrial membrane	10	751	241	39203	0.021	0.13	// GRMZM2G421234 // GRMZM2G149105 // GRMZM5G833747 // GRMZM2G080044 // AC196156.3_FG003 // GRMZM2G113408 // GRMZM2G105085 // GRMZM2G339503 // GRMZM5G801241 // GRMZM2G462140
GO:0005743	C	mitochondrial inner membrane	8	751	210	39203	0.055	0.34	// GRMZM2G421234 // GRMZM2G149105 // GRMZM5G833747 // GRMZM2G080044 // AC196156.3_FG003 // GRMZM2G113408 // GRMZM5G801241 // GRMZM2G462140
GO:0043232	C	intracellular non-membrane-bounded organelle	60	751	2597	39203	0.082	0.48	// GRMZM2G024668 // GRMZM2G107645 // GRMZM2G091383 // GRMZM2G110509 // GRMZM2G448458 // GRMZM2G455243 // GRMZM5G842058 // GRMZM2G077851 // GRMZM2G012631 // GRMZM2G302712 // GRMZM2G360677 // GRMZM2G028216 // GRMZM2G165969 // GRMZM2G113033 // GRMZM2G077942 // GRMZM2G316232 // GRMZM2G139900 // GRMZM2G360389 // GRMZM2G112912 // GRMZM2G087165 // GRMZM2G061135 // GRMZM2G113408 // GRMZM2G102891 // GRMZM…
GO:0043228	C	non-membrane-bounded organelle	60	751	2597	39203	0.082	0.48	// GRMZM2G024668 // GRMZM2G107645 // GRMZM2G091383 // GRMZM2G110509 // GRMZM2G448458 // GRMZM2G455243 // GRMZM5G842058 // GRMZM2G077851 // GRMZM2G012631 // GRMZM2G302712 // GRMZM2G360677 // GRMZM2G028216 // GRMZM2G165969 // GRMZM2G113033 // GRMZM2G077942 // GRMZM2G316232 // GRMZM2G139900 // GRMZM2G360389 // GRMZM2G112912 // GRMZM2G087165 // GRMZM2G061135 // GRMZM2G113408 // GRMZM2G102891 // GRMZM…
GO:0044427	C	chromosomal part	14	751	542	39203	0.17	0.94	// GRMZM2G332838 // GRMZM2G455243 // GRMZM2G107645 // GRMZM2G077991 // GRMZM2G003565 // GRMZM2G112912 // GRMZM2G448458 // GRMZM2G119071 // GRMZM2G047143 // GRMZM2G106133 // GRMZM2G024533 // GRMZM2G072855 // GRMZM2G063896 // AC233865.1_FG001
GO:0000786	C	nucleosome	9	751	320	39203	0.17	0.94	// GRMZM2G332838 // GRMZM2G077991 // GRMZM2G112912 // GRMZM2G448458 // GRMZM2G119071 // GRMZM2G106133 // GRMZM2G072855 // GRMZM2G063896 // AC233865.1_FG001
GO:0032991	C	macromolecular complex	77	751	3586	39203	0.16	0.94	// GRMZM2G034243 // GRMZM2G077851 // GRMZM2G091383 // AC215201.3_FG005 // GRMZM2G448458 // GRMZM2G063896 // GRMZM2G455243 // GRMZM2G099909 // GRMZM2G361842 // GRMZM2G055450 // GRMZM2G046848 // GRMZM2G462140 // GRMZM2G128092 // GRMZM2G018059 // GRMZM2G149649 // GRMZM2G302712 // AC199526.5_FG003 // GRMZM2G360677 // GRMZM2G064302 // GRMZM2G028216 // GRMZM2G113033 // GRMZM2G156174 // GRMZM2G139900 //…
GO:0032993	C	protein-DNA complex	9	751	320	39203	0.17	0.94	// GRMZM2G332838 // GRMZM2G077991 // GRMZM2G112912 // GRMZM2G448458 // GRMZM2G119071 // GRMZM2G106133 // GRMZM2G072855 // GRMZM2G063896 // AC233865.1_FG001
GO:0012505	C	endomembrane system	6	751	194	39203	0.18	0.96	// GRMZM2G056014 // GRMZM2G156174 // GRMZM2G091155 // GRMZM2G047143 // GRMZM2G120652 // GRMZM2G157317
GO:0043234	C	protein complex	36	751	1824	39203	0.45	1	// AC196156.3_FG003 // GRMZM2G455243 // GRMZM2G099909 // GRMZM2G046848 // GRMZM2G462140 // GRMZM2G053722 // GRMZM2G139624 // GRMZM2G064302 // GRMZM2G156174 // GRMZM2G113408 // GRMZM2G034243 // GRMZM2G155216 // GRMZM2G127690 // GRMZM2G026131 // GRMZM2G149105 // GRMZM2G421234 // GRMZM2G114399 // GRMZM2G026157 // GRMZM2G535911 // GRMZM2G100473 // AC203985.4_FG005 // GRMZM2G339503 // GRMZM2G361842 //…
GO:0044430	C	cytoskeletal part	5	751	229	39203	0.45	1	// GRMZM2G047143 // GRMZM2G100473 // GRMZM2G026131 // GRMZM2G107645 // GRMZM2G006341
GO:0000785	C	chromatin	11	751	526	39203	0.43	1	// GRMZM2G332838 // GRMZM2G077991 // GRMZM2G448458 // GRMZM2G112912 // GRMZM2G003565 // GRMZM2G119071 // GRMZM2G106133 // GRMZM2G024533 // GRMZM2G072855 // GRMZM2G063896 // AC233865.1_FG001
GO:0005856	C	cytoskeleton	7	751	513	39203	0.86	1	// GRMZM2G107645 // GRMZM2G077942 // GRMZM2G100473 // GRMZM2G006341 // GRMZM2G047143 // GRMZM5G842058 // GRMZM2G026131
GO:0030529	C	ribonucleoprotein complex	33	751	1484	39203	0.22	1	// AC215201.3_FG005 // GRMZM2G077851 // GRMZM2G302712 // GRMZM2G145308 // GRMZM2G360677 // GRMZM2G028216 // GRMZM2G077991 // GRMZM2G139900 // GRMZM2G087165 // GRMZM2G102891 // GRMZM2G163561 // GRMZM2G091383 // GRMZM2G157007 // GRMZM2G074085 // GRMZM2G113033 // GRMZM2G149649 // GRMZM2G171181 // GRMZM2G093574 // GRMZM2G344279 // GRMZM2G082707 // GRMZM2G168149 // GRMZM2G394122 // AC199526.5_FG003 //…
GO:0005840	C	ribosome	30	751	1390	39203	0.28	1	// AC215201.3_FG005 // GRMZM2G302712 // GRMZM2G145308 // GRMZM2G360677 // GRMZM2G028216 // GRMZM2G077991 // GRMZM2G139900 // GRMZM2G087165 // GRMZM2G102891 // GRMZM2G163561 // GRMZM2G091383 // GRMZM2G157007 // GRMZM2G074085 // GRMZM2G113033 // GRMZM2G149649 // GRMZM2G171181 // GRMZM2G093574 // GRMZM2G344279 // GRMZM2G082707 // GRMZM2G168149 // GRMZM2G394122 // GRMZM2G057608 // GRMZM2G379128 // GR…
GO:0005694	C	chromosome	14	751	661	39203	0.39	1	// GRMZM2G332838 // GRMZM2G455243 // GRMZM2G107645 // GRMZM2G077991 // GRMZM2G003565 // GRMZM2G112912 // GRMZM2G448458 // GRMZM2G119071 // GRMZM2G047143 // GRMZM2G106133 // GRMZM2G024533 // GRMZM2G072855 // GRMZM2G063896 // AC233865.1_FG001
GO:0015630	C	microtubule cytoskeleton	5	751	191	39203	0.31	1	// GRMZM2G047143 // GRMZM2G100473 // GRMZM2G026131 // GRMZM2G107645 // GRMZM2G006341

## Sheet: darkmagenta
GO_acc	term_type	Term	queryitem	querytotal	bgitem	bgtotal	pvalue	FDR	entries
GO:0032502	P	developmental process	43	504	111	39203	3.7e-45	5e-42	// GRMZM2G160687 // GRMZM2G137779 // GRMZM2G001530 // GRMZM2G150893 // GRMZM2G008898 // GRMZM2G177150 // GRMZM2G359952 // GRMZM2G013324 // GRMZM2G030731 // GRMZM2G390641 // GRMZM2G052581 // GRMZM2G441768 // GRMZM2G146511 // GRMZM2G370777 // GRMZM2G060163 // GRMZM2G145029 // GRMZM2G124276 // GRMZM2G176707 // GRMZM2G032619 // GRMZM2G038313 // GRMZM2G445169 // GRMZM2G315072 // GRMZM2G153233 // GRMZM…
GO:0048856	P	anatomical structure development	34	504	42	39203	3e-44	2e-41	// GRMZM2G160687 // GRMZM2G137779 // GRMZM2G001530 // GRMZM2G150893 // GRMZM2G359952 // GRMZM2G013324 // GRMZM2G030731 // GRMZM2G390641 // GRMZM2G052581 // GRMZM2G441768 // GRMZM2G370777 // GRMZM2G145029 // GRMZM2G032619 // GRMZM2G038313 // GRMZM2G445169 // GRMZM2G315072 // GRMZM2G153233 // GRMZM2G151955 // GRMZM2G348846 // GRMZM2G392524 // GRMZM2G092888 // GRMZM2G329144 // GRMZM2G402002 // GRMZM…
GO:0007275	P	multicellular organismal development	36	504	107	39203	3.7e-36	1.6e-33	// GRMZM2G160687 // GRMZM2G001530 // GRMZM2G177150 // GRMZM2G359952 // GRMZM2G013324 // GRMZM2G030731 // GRMZM2G390641 // GRMZM2G052581 // GRMZM2G441768 // GRMZM2G146511 // GRMZM2G370777 // GRMZM2G060163 // GRMZM2G145029 // GRMZM2G124276 // GRMZM2G032619 // GRMZM2G038313 // GRMZM2G315072 // GRMZM2G153233 // GRMZM2G151955 // GRMZM2G044963 // GRMZM2G348846 // GRMZM2G392524 // GRMZM2G092888 // GRMZM…
GO:0010033	P	response to organic substance	27	504	72	39203	1.9e-28	6.2e-26	// GRMZM2G310569 // GRMZM2G104081 // GRMZM2G390641 // GRMZM2G118800 // GRMZM2G137779 // GRMZM5G846196 // GRMZM2G021074 // GRMZM2G047219 // GRMZM2G046284 // GRMZM2G006894 // GRMZM2G315072 // GRMZM2G153233 // GRMZM2G102946 // GRMZM2G409726 // GRMZM2G126732 // GRMZM2G038636 // GRMZM2G363540 // GRMZM2G414540 // GRMZM2G014300 // GRMZM2G015011 // GRMZM2G475882 // GRMZM2G410710 // GRMZM2G093175 // GRMZM…
GO:0009719	P	response to endogenous stimulus	23	504	72	39203	4.1e-23	1.1e-20	// GRMZM2G310569 // GRMZM2G390641 // GRMZM2G118800 // GRMZM5G846196 // GRMZM2G021074 // GRMZM2G047219 // GRMZM2G046284 // GRMZM2G006894 // GRMZM2G315072 // GRMZM2G153233 // GRMZM2G102946 // GRMZM2G126732 // GRMZM2G038636 // GRMZM2G363540 // GRMZM2G414540 // GRMZM2G014300 // GRMZM2G015011 // GRMZM2G475882 // GRMZM2G410710 // GRMZM2G125495 // GRMZM2G165919 // GRMZM2G082792 // GRMZM2G016290
GO:0042221	P	response to chemical stimulus	49	504	626	39203	1.1e-22	2.3e-20	// GRMZM2G310569 // GRMZM2G104081 // GRMZM2G166459 // GRMZM2G347280 // GRMZM2G084195 // GRMZM2G390641 // GRMZM2G118800 // GRMZM2G137779 // GRMZM5G846196 // GRMZM2G021074 // GRMZM2G320269 // GRMZM5G891739 // GRMZM2G071450 // GRMZM2G150134 // GRMZM2G115105 // GRMZM2G150893 // GRMZM2G176707 // GRMZM2G047219 // GRMZM2G046284 // GRMZM2G048616 // GRMZM2G006894 // GRMZM2G477741 // GRMZM2G315072 // GRMZM…
GO:0048731	P	system development	19	504	40	39203	5.8e-22	1.1e-19	// GRMZM2G363540 // GRMZM5G809695 // GRMZM2G160687 // GRMZM2G153233 // GRMZM2G151955 // GRMZM2G359952 // GRMZM2G015011 // GRMZM2G370777 // GRMZM2G410710 // GRMZM2G013324 // GRMZM2G001530 // GRMZM2G092888 // GRMZM2G392524 // GRMZM2G315072 // GRMZM2G390641 // GRMZM2G052581 // GRMZM2G320606 // GRMZM2G008898 // GRMZM5G814279
GO:0009725	P	response to hormone stimulus	22	504	72	39203	8.2e-22	1.4e-19	// GRMZM2G310569 // GRMZM2G390641 // GRMZM2G118800 // GRMZM5G846196 // GRMZM2G021074 // GRMZM2G047219 // GRMZM2G046284 // GRMZM2G006894 // GRMZM2G315072 // GRMZM2G153233 // GRMZM2G102946 // GRMZM2G126732 // GRMZM2G038636 // GRMZM2G363540 // GRMZM2G414540 // GRMZM2G014300 // GRMZM2G015011 // GRMZM2G475882 // GRMZM2G410710 // GRMZM2G165919 // GRMZM2G082792 // GRMZM2G016290
GO:0022414	P	reproductive process	23	504	85	39203	9.8e-22	1.4e-19	// GRMZM2G160687 // GRMZM2G177150 // GRMZM2G030731 // GRMZM2G390641 // GRMZM2G441768 // GRMZM2G370777 // GRMZM2G145029 // GRMZM2G032619 // GRMZM2G038313 // GRMZM2G153233 // GRMZM2G044963 // GRMZM2G348846 // GRMZM2G384755 // GRMZM2G329144 // GRMZM2G402002 // GRMZM2G359952 // GRMZM2G142207 // GRMZM2G475882 // GRMZM2G320606 // GRMZM2G022398 // GRMZM2G008898 // GRMZM5G814279 // GRMZM2G029912
GO:0051707	P	response to other organism	14	504	16	39203	2.8e-19	3.8e-17	// GRMZM5G809695 // GRMZM2G414540 // GRMZM2G087094 // GRMZM2G150893 // GRMZM2G305115 // GRMZM2G041961 // GRMZM2G129246 // GRMZM2G166459 // GRMZM2G092793 // GRMZM2G126732 // GRMZM5G841893 // GRMZM2G047219 // GRMZM2G048616 // GRMZM2G162200
GO:0010035	P	response to inorganic substance	15	504	33	39203	2.2e-17	2.6e-15	// GRMZM2G363540 // GRMZM2G047457 // GRMZM2G039900 // GRMZM2G150893 // GRMZM2G124963 // GRMZM2G071450 // GRMZM5G828229 // GRMZM2G079381 // GRMZM2G347280 // GRMZM2G176707 // GRMZM2G304362 // GRMZM2G165919 // GRMZM2G046284 // GRMZM2G048616 // GRMZM2G477741
GO:0000003	P	reproduction	25	504	181	39203	2.6e-17	2.8e-15	// GRMZM2G160687 // GRMZM2G094990 // GRMZM2G177150 // GRMZM2G030731 // GRMZM2G390641 // GRMZM2G441768 // GRMZM2G370777 // GRMZM2G145029 // GRMZM2G327266 // GRMZM2G032619 // GRMZM2G038313 // GRMZM2G153233 // GRMZM2G044963 // GRMZM2G348846 // GRMZM2G384755 // GRMZM2G329144 // GRMZM2G402002 // GRMZM2G359952 // GRMZM2G142207 // GRMZM2G475882 // GRMZM2G320606 // GRMZM2G022398 // GRMZM2G008898 // GRMZM…
GO:0009607	P	response to biotic stimulus	14	504	31	39203	2.7e-16	2.8e-14	// GRMZM5G809695 // GRMZM2G414540 // GRMZM2G087094 // GRMZM2G150893 // GRMZM2G305115 // GRMZM2G041961 // GRMZM2G129246 // GRMZM2G166459 // GRMZM2G092793 // GRMZM2G126732 // GRMZM5G841893 // GRMZM2G047219 // GRMZM2G048616 // GRMZM2G162200
GO:0010038	P	response to metal ion	13	504	27	39203	1.7e-15	1.6e-13	// GRMZM2G363540 // GRMZM2G047457 // GRMZM2G039900 // GRMZM2G150893 // GRMZM2G124963 // GRMZM2G071450 // GRMZM5G828229 // GRMZM2G347280 // GRMZM2G176707 // GRMZM2G304362 // GRMZM2G046284 // GRMZM2G048616 // GRMZM2G477741
GO:0070887	P	cellular response to chemical stimulus	10	504	10	39203	1.6e-14	1.5e-12	// GRMZM2G414540 // GRMZM2G153233 // GRMZM2G102946 // GRMZM2G104081 // GRMZM5G891739 // GRMZM2G125495 // GRMZM2G390641 // GRMZM2G475882 // GRMZM2G126732 // GRMZM2G137779
GO:0009314	P	response to radiation	15	504	61	39203	4.1e-14	3.2e-12	// GRMZM2G363540 // GRMZM2G126956 // GRMZM2G445169 // GRMZM2G044963 // GRMZM2G150893 // GRMZM5G891739 // GRMZM2G071450 // GRMZM2G067853 // GRMZM2G124276 // GRMZM2G162200 // GRMZM2G092793 // GRMZM2G032619 // GRMZM2G402002 // GRMZM2G165919 // GRMZM2G038313
GO:0009416	P	response to light stimulus	15	504	61	39203	4.1e-14	3.2e-12	// GRMZM2G363540 // GRMZM2G126956 // GRMZM2G445169 // GRMZM2G044963 // GRMZM2G150893 // GRMZM5G891739 // GRMZM2G071450 // GRMZM2G067853 // GRMZM2G124276 // GRMZM2G162200 // GRMZM2G092793 // GRMZM2G032619 // GRMZM2G402002 // GRMZM2G165919 // GRMZM2G038313
GO:0048519	P	negative regulation of biological process	13	504	49	39203	9e-13	6.6e-11	// GRMZM2G160687 // GRMZM2G102946 // GRMZM2G370777 // GRMZM2G150893 // GRMZM2G071450 // GRMZM2G082792 // GRMZM2G359952 // GRMZM2G315072 // GRMZM2G092888 // GRMZM2G402002 // GRMZM5G814279 // GRMZM2G091595 // GRMZM2G414540
GO:0051704	P	multi-organism process	20	504	186	39203	2.8e-12	1.9e-10	// GRMZM5G809695 // GRMZM2G414540 // GRMZM2G087094 // GRMZM2G044963 // GRMZM2G150893 // GRMZM2G305115 // GRMZM2G142207 // GRMZM2G041961 // GRMZM2G034288 // GRMZM2G129246 // GRMZM2G166459 // GRMZM2G092793 // GRMZM2G384755 // GRMZM2G126732 // GRMZM2G176707 // GRMZM2G047219 // GRMZM2G022398 // GRMZM2G048616 // GRMZM5G841893 // GRMZM2G162200
GO:0048523	P	negative regulation of cellular process	12	504	42	39203	3.2e-12	2.2e-10	// GRMZM2G160687 // GRMZM2G102946 // GRMZM2G370777 // GRMZM2G071450 // GRMZM2G082792 // GRMZM2G359952 // GRMZM2G315072 // GRMZM2G092888 // GRMZM2G402002 // GRMZM5G814279 // GRMZM2G091595 // GRMZM2G414540
GO:0032535	P	regulation of cellular component size	9	504	27	39203	5.5e-10	3.3e-08	// GRMZM5G809695 // GRMZM2G137779 // GRMZM2G165613 // GRMZM2G150893 // GRMZM2G410710 // GRMZM2G001530 // GRMZM2G013324 // GRMZM5G804575 // AC213621.5_FG004
GO:0090066	P	regulation of anatomical structure size	9	504	27	39203	5.5e-10	3.3e-08	// GRMZM5G809695 // GRMZM2G137779 // GRMZM2G165613 // GRMZM2G150893 // GRMZM2G410710 // GRMZM2G001530 // GRMZM2G013324 // GRMZM5G804575 // AC213621.5_FG004
GO:0009620	P	response to fungus	7	504	12	39203	2.2e-09	1.3e-07	// GRMZM5G809695 // GRMZM2G414540 // GRMZM2G150893 // GRMZM2G041961 // GRMZM2G126732 // GRMZM5G841893 // GRMZM2G048616
GO:0009639	P	response to red or far red light	6	504	6	39203	3.5e-09	1.9e-07	// GRMZM2G363540 // GRMZM2G445169 // GRMZM2G044963 // GRMZM2G124276 // GRMZM2G402002 // GRMZM2G038313
GO:0051716	P	cellular response to stimulus	21	504	324	39203	4.6e-09	2.5e-07	// GRMZM2G137779 // GRMZM2G377589 // GRMZM5G891739 // GRMZM2G153233 // GRMZM2G102946 // GRMZM2G433727 // GRMZM2G104081 // GRMZM2G305115 // GRMZM2G093101 // GRMZM2G069856 // GRMZM2G404025 // GRMZM2G136219 // GRMZM2G093175 // GRMZM2G125495 // GRMZM2G390641 // GRMZM2G126956 // GRMZM2G126732 // GRMZM2G176707 // GRMZM2G475882 // GRMZM2G091595 // GRMZM2G414540
GO:0050896	P	response to stimulus	83	504	3421	39203	2.4e-08	1.2e-06	// GRMZM5G891739 // GRMZM2G033846 // GRMZM2G087094 // GRMZM2G433727 // GRMZM2G104081 // GRMZM2G166459 // GRMZM2G146809 // GRMZM2G377589 // GRMZM2G126732 // GRMZM2G390641 // GRMZM2G137779 // GRMZM5G841893 // GRMZM2G036217 // GRMZM2G118800 // GRMZM2G410710 // GRMZM2G310569 // GRMZM5G846196 // GRMZM2G162200 // GRMZM2G093101 // GRMZM2G477741 // GRMZM2G021074 // GRMZM2G370777 // GRMZM2G320269 // GRMZM…
GO:0009415	P	response to water	8	504	38	39203	1.1e-07	5.2e-06	// GRMZM2G014300 // GRMZM2G373522 // AC196961.2_FG003 // GRMZM2G084195 // GRMZM2G165919 // GRMZM2G118800 // GRMZM2G006894 // GRMZM2G310569
GO:0019748	P	secondary metabolic process	11	504	94	39203	1.1e-07	5.2e-06	// GRMZM2G081682 // GRMZM2G153233 // GRMZM2G137151 // GRMZM2G102550 // GRMZM2G305115 // GRMZM2G081582 // GRMZM2G145029 // GRMZM2G152135 // GRMZM2G390641 // GRMZM2G036217 // GRMZM2G012966
GO:0009414	P	response to water deprivation	7	504	26	39203	1.6e-07	7.5e-06	// GRMZM2G014300 // AC196961.2_FG003 // GRMZM2G084195 // GRMZM2G165919 // GRMZM2G118800 // GRMZM2G006894 // GRMZM2G310569
GO:0009617	P	response to bacterium	6	504	16	39203	2.5e-07	1.1e-05	// GRMZM2G150893 // GRMZM2G305115 // GRMZM2G041961 // GRMZM2G129246 // GRMZM2G162200 // GRMZM2G047219
GO:0007049	P	cell cycle	8	504	55	39203	1.3e-06	5.7e-05	// GRMZM2G015011 // GRMZM2G457697 // GRMZM2G078959 // GRMZM2G320606 // GRMZM2G060163 // GRMZM2G441768 // GRMZM2G091595 // GRMZM2G071264
GO:0050832	P	defense response to fungus	5	504	12	39203	1.8e-06	7.1e-05	// GRMZM5G809695 // GRMZM2G041961 // GRMZM2G414540 // GRMZM5G841893 // GRMZM2G150893
GO:0042742	P	defense response to bacterium	5	504	12	39203	1.8e-06	7.1e-05	// GRMZM2G150893 // GRMZM2G047219 // GRMZM2G162200 // GRMZM2G305115 // GRMZM2G129246
GO:0006721	P	terpenoid metabolic process	5	504	16	39203	5.6e-06	0.00022	// GRMZM2G102550 // GRMZM2G145029 // GRMZM2G137151 // GRMZM2G152135 // GRMZM2G012966
GO:0009698	P	phenylpropanoid metabolic process	5	504	18	39203	9e-06	0.00034	// GRMZM2G390641 // GRMZM2G305115 // GRMZM2G081582 // GRMZM2G153233 // GRMZM2G036217
GO:0042440	P	pigment metabolic process	7	504	53	39203	1.1e-05	0.00041	// GRMZM2G153233 // GRMZM2G137151 // AC209206.3_FG014 // GRMZM2G305115 // GRMZM2G152135 // GRMZM2G390641 // GRMZM2G012966
GO:0051172	P	negative regulation of nitrogen compound metabolic process	5	504	21	39203	1.7e-05	0.00061	// GRMZM2G370777 // GRMZM2G402002 // GRMZM2G315072 // GRMZM2G091595 // GRMZM2G082792
GO:0042398	P	cellular amino acid derivative biosynthetic process	7	504	61	39203	2.5e-05	0.00088	// GRMZM2G315072 // GRMZM2G153233 // GRMZM2G081582 // GRMZM2G085381 // GRMZM2G390641 // GRMZM2G126732 // GRMZM2G036217
GO:0009890	P	negative regulation of biosynthetic process	6	504	42	39203	3.2e-05	0.001	// GRMZM2G315072 // GRMZM2G370777 // GRMZM2G071450 // GRMZM2G082792 // GRMZM2G402002 // GRMZM2G091595
GO:0031327	P	negative regulation of cellular biosynthetic process	6	504	42	39203	3.2e-05	0.001	// GRMZM2G315072 // GRMZM2G370777 // GRMZM2G071450 // GRMZM2G082792 // GRMZM2G402002 // GRMZM2G091595
GO:0031324	P	negative regulation of cellular metabolic process	6	504	42	39203	3.2e-05	0.001	// GRMZM2G315072 // GRMZM2G370777 // GRMZM2G071450 // GRMZM2G082792 // GRMZM2G402002 // GRMZM2G091595
GO:0046148	P	pigment biosynthetic process	6	504	46	39203	5e-05	0.0016	// GRMZM2G153233 // GRMZM2G012966 // AC209206.3_FG014 // GRMZM2G152135 // GRMZM2G390641 // GRMZM2G137151
GO:0009892	P	negative regulation of metabolic process	6	504	47	39203	5.6e-05	0.0017	// GRMZM2G315072 // GRMZM2G370777 // GRMZM2G071450 // GRMZM2G082792 // GRMZM2G402002 // GRMZM2G091595
GO:0044283	P	small molecule biosynthetic process	23	504	708	39203	7.6e-05	0.0023	// GRMZM2G137779 // GRMZM2G052935 // GRMZM2G390641 // GRMZM2G036217 // GRMZM5G850019 // GRMZM2G016774 // GRMZM2G081582 // GRMZM2G085381 // GRMZM2G152135 // GRMZM2G036708 // GRMZM2G124276 // GRMZM2G109472 // GRMZM5G823318 // GRMZM2G093789 // GRMZM2G315072 // GRMZM2G153233 // GRMZM2G126732 // GRMZM2G101875 // GRMZM2G093175 // AC189750.4_FG004 // GRMZM2G320099 // GRMZM2G090241 // GRMZM2G029912
GO:0033554	P	cellular response to stress	14	504	314	39203	9.1e-05	0.0027	// GRMZM2G377589 // GRMZM5G891739 // GRMZM2G433727 // GRMZM2G305115 // GRMZM2G093101 // GRMZM2G404025 // GRMZM2G136219 // GRMZM2G093175 // GRMZM2G125495 // GRMZM2G069856 // GRMZM2G126956 // GRMZM2G176707 // GRMZM2G091595 // GRMZM2G414540
GO:0015674	P	di-, tri-valent inorganic cation transport	7	504	91	39203	0.00026	0.0075	// GRMZM2G010779 // GRMZM2G047457 // GRMZM2G317270 // GRMZM2G067853 // GRMZM2G125495 // GRMZM2G115105 // GRMZM2G420436
GO:0010558	P	negative regulation of macromolecule biosynthetic process	5	504	42	39203	0.00032	0.009	// GRMZM2G370777 // GRMZM2G402002 // GRMZM2G071450 // GRMZM2G091595 // GRMZM2G082792
GO:0007242	P	intracellular signaling cascade	16	504	455	39203	0.0004	0.011	// GRMZM2G414540 // GRMZM2G153233 // GRMZM2G102946 // GRMZM2G039900 // GRMZM2G044963 // GRMZM2G104081 // GRMZM2G373738 // GRMZM2G129246 // GRMZM2G125495 // GRMZM2G390641 // GRMZM2G475882 // GRMZM2G137779 // GRMZM2G109472 // GRMZM2G089484 // GRMZM2G305115 // GRMZM2G047476
GO:0044281	P	small molecule metabolic process	56	504	2730	39203	0.00047	0.013	// GRMZM2G052935 // GRMZM2G081582 // GRMZM5G850019 // AC203173.3_FG004 // GRMZM2G104081 // GRMZM2G001905 // GRMZM2G124276 // GRMZM2G013324 // GRMZM2G390641 // GRMZM2G152135 // GRMZM2G111462 // GRMZM2G137779 // GRMZM5G887303 // GRMZM2G000223 // GRMZM2G090241 // GRMZM2G033198 // GRMZM2G016774 // GRMZM2G021074 // GRMZM2G060163 // GRMZM2G010056 // GRMZM2G093175 // GRMZM2G034288 // GRMZM2G036708 // GR…
GO:0010605	P	negative regulation of macromolecule metabolic process	5	504	47	39203	0.00051	0.014	// GRMZM2G370777 // GRMZM2G402002 // GRMZM2G071450 // GRMZM2G091595 // GRMZM2G082792
GO:0070838	P	divalent metal ion transport	5	504	51	39203	0.00072	0.019	// GRMZM2G067853 // GRMZM2G317270 // GRMZM2G125495 // GRMZM2G420436 // GRMZM2G010779
GO:0006575	P	cellular amino acid derivative metabolic process	8	504	144	39203	0.00076	0.019	// GRMZM2G315072 // GRMZM2G153233 // GRMZM2G305115 // GRMZM2G081582 // GRMZM2G085381 // GRMZM2G390641 // GRMZM2G126732 // GRMZM2G036217
GO:0006629	P	lipid metabolic process	26	504	1068	39203	0.0019	0.047	// GRMZM5G850019 // GRMZM2G102550 // GRMZM2G145029 // GRMZM2G012966 // GRMZM2G013324 // GRMZM2G425249 // GRMZM2G069503 // GRMZM2G036217 // GRMZM2G137151 // GRMZM2G016774 // GRMZM2G100822 // GRMZM2G152135 // GRMZM2G124276 // GRMZM2G071249 // GRMZM2G064594 // GRMZM2G416817 // GRMZM5G883417 // GRMZM2G062045 // GRMZM2G174975 // GRMZM2G152895 // GRMZM2G029400 // GRMZM2G101875 // GRMZM2G158205 // GRMZM…
GO:0032787	P	monocarboxylic acid metabolic process	10	504	252	39203	0.0021	0.051	// GRMZM2G097226 // GRMZM5G850019 // GRMZM2G016774 // GRMZM2G081582 // GRMZM2G152135 // GRMZM2G101875 // GRMZM2G124276 // GRMZM5G883417 // GRMZM2G036217 // GRMZM2G029912
GO:0071669	P	plant-type cell wall organization or biogenesis	5	504	66	39203	0.0021	0.051	// GRMZM2G142898 // GRMZM2G445169 // GRMZM5G804575 // GRMZM2G102946 // GRMZM2G013324
GO:0055114	P	oxidation reduction	53	504	2743	39203	0.0024	0.056	// GRMZM2G150893 // GRMZM5G850019 // GRMZM2G320269 // GRMZM2G110369 // GRMZM5G872368 // GRMZM2G150134 // GRMZM2G010468 // GRMZM2G118800 // GRMZM2G180082 // GRMZM2G090241 // GRMZM2G155502 // GRMZM2G127668 // GRMZM2G139512 // GRMZM2G074114 // GRMZM2G060163 // GRMZM2G064753 // GRMZM5G891739 // GRMZM2G023952 // GRMZM2G010348 // GRMZM2G152135 // GRMZM2G124276 // GRMZM2G127232 // GRMZM5G883417 // GRMZM…
GO:0032259	P	methylation	6	504	100	39203	0.0024	0.056	// GRMZM2G060070 // GRMZM2G010056 // GRMZM2G034288 // GRMZM2G100315 // GRMZM2G008287 // GRMZM2G442804
GO:0006996	P	organelle organization	18	504	657	39203	0.0028	0.064	// AC155376.2_FG004 // AC196961.2_FG003 // GRMZM2G039930 // GRMZM2G071959 // GRMZM2G070444 // GRMZM2G410710 // GRMZM2G078959 // GRMZM2G116542 // GRMZM2G034288 // GRMZM2G046055 // GRMZM2G387076 // GRMZM2G348846 // GRMZM2G320606 // GRMZM2G306258 // GRMZM2G176707 // GRMZM2G084195 // GRMZM2G441768 // GRMZM2G007453
GO:0006631	P	fatty acid metabolic process	8	504	187	39203	0.0036	0.082	// GRMZM5G850019 // GRMZM2G016774 // GRMZM2G152135 // GRMZM2G101875 // GRMZM2G124276 // GRMZM5G883417 // GRMZM2G036217 // GRMZM2G029912
GO:0044255	P	cellular lipid metabolic process	14	504	474	39203	0.0042	0.094	// GRMZM5G850019 // GRMZM2G016774 // GRMZM2G102550 // GRMZM2G145029 // GRMZM2G152135 // GRMZM2G101875 // GRMZM2G012966 // GRMZM2G062045 // GRMZM2G124276 // GRMZM2G425249 // GRMZM5G883417 // GRMZM2G036217 // GRMZM2G029912 // GRMZM2G137151
GO:0006720	P	isoprenoid metabolic process	5	504	80	39203	0.0046	0.099	// GRMZM2G102550 // GRMZM2G145029 // GRMZM2G137151 // GRMZM2G152135 // GRMZM2G012966
GO:0008299	P	isoprenoid biosynthetic process	5	504	80	39203	0.0046	0.099	// GRMZM2G102550 // GRMZM2G145029 // GRMZM2G137151 // GRMZM2G152135 // GRMZM2G012966
GO:0006812	P	cation transport	22	504	924	39203	0.0052	0.11	// GRMZM2G310569 // GRMZM2G132690 // GRMZM2G131431 // GRMZM2G420436 // GRMZM2G000223 // GRMZM5G887216 // GRMZM2G321725 // GRMZM2G115105 // GRMZM2G341405 // GRMZM2G313009 // GRMZM2G006894 // GRMZM2G477741 // GRMZM2G515874 // GRMZM2G010779 // GRMZM2G047457 // GRMZM2G701207 // GRMZM2G047476 // GRMZM2G317270 // GRMZM2G111300 // GRMZM2G067853 // GRMZM2G125495 // GRMZM2G123884
GO:0006355	P	regulation of transcription, DNA-dependent	43	504	2208	39203	0.0053	0.11	// GRMZM2G160687 // GRMZM2G112483 // GRMZM5G803355 // GRMZM2G037630 // GRMZM2G359952 // GRMZM2G092888 // GRMZM2G134260 // GRMZM2G390641 // GRMZM2G072926 // GRMZM2G015433 // GRMZM2G036567 // GRMZM2G370777 // GRMZM5G805026 // GRMZM5G816314 // GRMZM2G031882 // GRMZM2G105834 // GRMZM5G857944 // GRMZM2G341405 // GRMZM2G105387 // GRMZM2G151763 // GRMZM2G162749 // GRMZM2G106548 // GRMZM2G153233 // GRMZM…
GO:0051252	P	regulation of RNA metabolic process	43	504	2211	39203	0.0054	0.11	// GRMZM2G160687 // GRMZM2G112483 // GRMZM5G803355 // GRMZM2G037630 // GRMZM2G359952 // GRMZM2G092888 // GRMZM2G134260 // GRMZM2G390641 // GRMZM2G072926 // GRMZM2G015433 // GRMZM2G036567 // GRMZM2G370777 // GRMZM5G805026 // GRMZM5G816314 // GRMZM2G031882 // GRMZM2G105834 // GRMZM5G857944 // GRMZM2G341405 // GRMZM2G105387 // GRMZM2G151763 // GRMZM2G162749 // GRMZM2G106548 // GRMZM2G153233 // GRMZM…
GO:0016043	P	cellular component organization	28	504	1290	39203	0.006	0.12	// GRMZM2G137779 // GRMZM2G036567 // GRMZM2G150893 // GRMZM2G084195 // GRMZM2G013324 // GRMZM2G441768 // GRMZM2G007453 // GRMZM2G033198 // GRMZM2G039930 // GRMZM2G034288 // GRMZM2G387076 // GRMZM2G176707 // GRMZM2G071264 // GRMZM2G071959 // GRMZM2G348846 // AC155376.2_FG004 // GRMZM2G116542 // GRMZM2G177145 // AC196961.2_FG003 // GRMZM2G143917 // GRMZM2G070444 // GRMZM2G410710 // GRMZM2G078959 //…
GO:0006730	P	one-carbon metabolic process	6	504	124	39203	0.0065	0.13	// GRMZM2G060070 // GRMZM2G010056 // GRMZM2G034288 // GRMZM2G100315 // GRMZM2G008287 // GRMZM2G442804
GO:0009628	P	response to abiotic stimulus	37	504	1856	39203	0.0066	0.13	// GRMZM5G891739 // GRMZM2G033846 // GRMZM2G310569 // AC203173.3_FG004 // GRMZM2G150893 // GRMZM2G084195 // GRMZM2G036217 // GRMZM2G118800 // GRMZM5G846196 // GRMZM2G370777 // GRMZM2G459811 // GRMZM2G071450 // GRMZM2G126956 // GRMZM2G041961 // GRMZM2G092793 // GRMZM2G025854 // GRMZM2G032619 // GRMZM2G006894 // GRMZM2G038313 // GRMZM2G445169 // GRMZM2G044963 // GRMZM2G373522 // GRMZM5G828229 // AC…
GO:0023046	P	signaling process	19	504	783	39203	0.0075	0.14	// GRMZM2G137779 // GRMZM2G414540 // GRMZM2G153233 // GRMZM2G102946 // GRMZM2G039900 // GRMZM2G044963 // GRMZM2G104081 // GRMZM2G373738 // GRMZM2G143253 // GRMZM2G129246 // GRMZM2G320941 // GRMZM2G125495 // GRMZM2G390641 // GRMZM2G475882 // GRMZM2G341405 // GRMZM2G109472 // GRMZM2G089484 // GRMZM2G305115 // GRMZM2G047476
GO:0023060	P	signal transmission	19	504	783	39203	0.0075	0.14	// GRMZM2G137779 // GRMZM2G414540 // GRMZM2G153233 // GRMZM2G102946 // GRMZM2G039900 // GRMZM2G044963 // GRMZM2G104081 // GRMZM2G373738 // GRMZM2G143253 // GRMZM2G129246 // GRMZM2G320941 // GRMZM2G125495 // GRMZM2G390641 // GRMZM2G475882 // GRMZM2G341405 // GRMZM2G109472 // GRMZM2G089484 // GRMZM2G305115 // GRMZM2G047476
GO:0034220	P	ion transmembrane transport	7	504	170	39203	0.0077	0.14	// GRMZM2G701207 // GRMZM2G047476 // GRMZM2G317270 // GRMZM2G111300 // GRMZM2G125495 // GRMZM2G321725 // GRMZM2G131431
GO:0006351	P	transcription, DNA-dependent	44	504	2362	39203	0.01	0.19	// GRMZM2G160687 // GRMZM2G112483 // GRMZM5G803355 // GRMZM2G037630 // GRMZM2G359952 // GRMZM2G092888 // GRMZM2G134260 // GRMZM2G390641 // GRMZM2G072926 // GRMZM2G015433 // GRMZM2G036567 // GRMZM2G370777 // GRMZM5G805026 // GRMZM5G816314 // GRMZM2G031882 // GRMZM2G105834 // GRMZM5G857944 // GRMZM2G341405 // GRMZM2G105387 // GRMZM2G151763 // GRMZM2G322661 // GRMZM2G162749 // GRMZM2G106548 // GRMZM…
GO:0032774	P	RNA biosynthetic process	44	504	2364	39203	0.01	0.19	// GRMZM2G160687 // GRMZM2G112483 // GRMZM5G803355 // GRMZM2G037630 // GRMZM2G359952 // GRMZM2G092888 // GRMZM2G134260 // GRMZM2G390641 // GRMZM2G072926 // GRMZM2G015433 // GRMZM2G036567 // GRMZM2G370777 // GRMZM5G805026 // GRMZM5G816314 // GRMZM2G031882 // GRMZM2G105834 // GRMZM5G857944 // GRMZM2G341405 // GRMZM2G105387 // GRMZM2G151763 // GRMZM2G322661 // GRMZM2G162749 // GRMZM2G106548 // GRMZM…
GO:0032501	P	multicellular organismal process	38	504	1983	39203	0.011	0.19	// GRMZM2G160687 // GRMZM2G001530 // GRMZM2G177150 // GRMZM2G359952 // GRMZM2G013324 // GRMZM2G030731 // GRMZM2G390641 // GRMZM2G052581 // GRMZM2G441768 // GRMZM2G146511 // GRMZM2G370777 // GRMZM2G060163 // GRMZM2G145029 // GRMZM2G124276 // GRMZM2G032619 // GRMZM2G038313 // GRMZM2G315072 // GRMZM2G153233 // GRMZM2G151955 // GRMZM2G044963 // GRMZM2G348846 // GRMZM2G392524 // GRMZM2G384755 // GRMZM…
GO:0007154	P	cell communication	8	504	229	39203	0.011	0.2	// GRMZM2G030850 // GRMZM2G102946 // GRMZM2G142207 // GRMZM2G093101 // GRMZM2G404025 // GRMZM2G093175 // GRMZM2G109472 // GRMZM2G384755
GO:0019953	P	sexual reproduction	5	504	101	39203	0.011	0.2	// GRMZM2G177150 // GRMZM2G441768 // GRMZM2G094990 // GRMZM2G029912 // GRMZM2G327266
GO:0007165	P	signal transduction	17	504	711	39203	0.013	0.22	// GRMZM2G414540 // GRMZM2G153233 // GRMZM2G102946 // GRMZM2G039900 // GRMZM2G044963 // GRMZM2G104081 // GRMZM2G373738 // GRMZM2G143253 // GRMZM2G129246 // GRMZM2G125495 // GRMZM2G390641 // GRMZM2G475882 // GRMZM2G137779 // GRMZM2G109472 // GRMZM2G089484 // GRMZM2G305115 // GRMZM2G047476
GO:0019438	P	aromatic compound biosynthetic process	5	504	104	39203	0.013	0.22	// GRMZM2G390641 // GRMZM2G085381 // GRMZM2G081582 // GRMZM2G153233 // GRMZM2G036217
GO:0016053	P	organic acid biosynthetic process	13	504	492	39203	0.013	0.22	// GRMZM5G850019 // GRMZM2G016774 // GRMZM2G052935 // GRMZM2G093175 // GRMZM2G152135 // GRMZM2G101875 // GRMZM2G036708 // GRMZM2G085381 // GRMZM2G124276 // GRMZM5G823318 // AC189750.4_FG004 // GRMZM2G029912 // GRMZM2G090241
GO:0046394	P	carboxylic acid biosynthetic process	13	504	492	39203	0.013	0.22	// GRMZM5G850019 // GRMZM2G016774 // GRMZM2G052935 // GRMZM2G093175 // GRMZM2G152135 // GRMZM2G101875 // GRMZM2G036708 // GRMZM2G085381 // GRMZM2G124276 // GRMZM5G823318 // AC189750.4_FG004 // GRMZM2G029912 // GRMZM2G090241
GO:0030001	P	metal ion transport	15	504	616	39203	0.016	0.26	// GRMZM2G010779 // GRMZM2G047457 // GRMZM2G313009 // GRMZM2G067853 // GRMZM2G310569 // GRMZM2G132690 // GRMZM2G317270 // GRMZM2G111300 // GRMZM5G887216 // GRMZM2G125495 // GRMZM2G115105 // GRMZM2G123884 // GRMZM2G515874 // GRMZM2G420436 // GRMZM2G477741
GO:0006811	P	ion transport	23	504	1096	39203	0.017	0.28	// GRMZM2G310569 // GRMZM2G132690 // GRMZM2G321725 // GRMZM2G000223 // GRMZM2G420436 // GRMZM2G131431 // GRMZM5G887216 // GRMZM2G092793 // GRMZM2G115105 // GRMZM2G341405 // GRMZM2G313009 // GRMZM2G006894 // GRMZM2G477741 // GRMZM2G515874 // GRMZM2G010779 // GRMZM2G047457 // GRMZM2G701207 // GRMZM2G047476 // GRMZM2G317270 // GRMZM2G111300 // GRMZM2G067853 // GRMZM2G125495 // GRMZM2G123884
GO:0006633	P	fatty acid biosynthetic process	6	504	159	39203	0.019	0.31	// GRMZM5G850019 // GRMZM2G016774 // GRMZM2G152135 // GRMZM2G101875 // GRMZM2G124276 // GRMZM2G029912
GO:0043436	P	oxoacid metabolic process	24	504	1186	39203	0.022	0.34	// GRMZM5G850019 // GRMZM2G052935 // GRMZM2G101875 // GRMZM2G036217 // GRMZM2G090241 // GRMZM2G016774 // GRMZM2G081582 // GRMZM2G085381 // GRMZM2G152135 // GRMZM2G036708 // GRMZM2G124276 // GRMZM5G823318 // GRMZM5G883417 // GRMZM2G381051 // GRMZM2G097226 // GRMZM2G315072 // GRMZM2G124963 // GRMZM2G126732 // GRMZM5G887303 // GRMZM2G093175 // GRMZM2G176397 // AC189750.4_FG004 // GRMZM2G006672 // GR…
GO:0050794	P	regulation of cellular process	70	504	4274	39203	0.022	0.34	// GRMZM2G160687 // GRMZM2G112483 // GRMZM2G137779 // GRMZM5G803355 // GRMZM2G165613 // GRMZM2G104081 // GRMZM2G373738 // GRMZM2G072926 // GRMZM2G037630 // GRMZM2G359952 // GRMZM2G092888 // GRMZM2G134260 // GRMZM2G390641 // GRMZM2G402862 // GRMZM2G315072 // GRMZM2G015433 // GRMZM2G033198 // GRMZM2G036567 // GRMZM2G370777 // GRMZM5G805026 // GRMZM2G122076 // GRMZM2G071450 // GRMZM2G031882 // GRMZM…
GO:0019752	P	carboxylic acid metabolic process	24	504	1186	39203	0.022	0.34	// GRMZM5G850019 // GRMZM2G052935 // GRMZM2G101875 // GRMZM2G036217 // GRMZM2G090241 // GRMZM2G016774 // GRMZM2G081582 // GRMZM2G085381 // GRMZM2G152135 // GRMZM2G036708 // GRMZM2G124276 // GRMZM5G823318 // GRMZM5G883417 // GRMZM2G381051 // GRMZM2G097226 // GRMZM2G315072 // GRMZM2G124963 // GRMZM2G126732 // GRMZM5G887303 // GRMZM2G093175 // GRMZM2G176397 // AC189750.4_FG004 // GRMZM2G006672 // GR…
GO:0006082	P	organic acid metabolic process	24	504	1188	39203	0.022	0.34	// GRMZM5G850019 // GRMZM2G052935 // GRMZM2G101875 // GRMZM2G036217 // GRMZM2G090241 // GRMZM2G016774 // GRMZM2G081582 // GRMZM2G085381 // GRMZM2G152135 // GRMZM2G036708 // GRMZM2G124276 // GRMZM5G823318 // GRMZM5G883417 // GRMZM2G381051 // GRMZM2G097226 // GRMZM2G315072 // GRMZM2G124963 // GRMZM2G126732 // GRMZM5G887303 // GRMZM2G093175 // GRMZM2G176397 // AC189750.4_FG004 // GRMZM2G006672 // GR…
GO:0008152	P	metabolic process	283	504	20231	39203	0.023	0.35	// GRMZM2G089421 // GRMZM2G150893 // GRMZM5G803355 // GRMZM2G115621 // GRMZM2G110369 // GRMZM2G037630 // GRMZM2G150134 // GRMZM2G359952 // GRMZM2G320941 // GRMZM2G030731 // GRMZM2G579719 // GRMZM2G425249 // GRMZM2G111462 // GRMZM2G079381 // GRMZM2G105933 // GRMZM2G015433 // GRMZM2G090241 // GRMZM2G056903 // GRMZM2G039930 // GRMZM2G139512 // GRMZM2G137151 // GRMZM2G031447 // GRMZM2G060163 // GRMZM…
GO:0042180	P	cellular ketone metabolic process	24	504	1198	39203	0.024	0.37	// GRMZM5G850019 // GRMZM2G052935 // GRMZM2G101875 // GRMZM2G036217 // GRMZM2G090241 // GRMZM2G016774 // GRMZM2G081582 // GRMZM2G085381 // GRMZM2G152135 // GRMZM2G036708 // GRMZM2G124276 // GRMZM5G823318 // GRMZM5G883417 // GRMZM2G381051 // GRMZM2G097226 // GRMZM2G315072 // GRMZM2G124963 // GRMZM2G126732 // GRMZM5G887303 // GRMZM2G093175 // GRMZM2G176397 // AC189750.4_FG004 // GRMZM2G006672 // GR…
GO:0071103	P	DNA conformation change	11	504	428	39203	0.026	0.38	// GRMZM2G071959 // GRMZM2G015011 // GRMZM2G070444 // GRMZM2G046055 // GRMZM2G387076 // GRMZM2G052581 // GRMZM2G320606 // GRMZM2G306258 // AC196961.2_FG003 // GRMZM2G084195 // GRMZM2G176707
GO:0031497	P	chromatin assembly	9	504	322	39203	0.027	0.39	// GRMZM2G071959 // GRMZM2G070444 // GRMZM2G046055 // GRMZM2G387076 // GRMZM2G320606 // GRMZM2G306258 // AC196961.2_FG003 // GRMZM2G084195 // GRMZM2G176707
GO:0006323	P	DNA packaging	9	504	323	39203	0.027	0.39	// GRMZM2G071959 // GRMZM2G070444 // GRMZM2G046055 // GRMZM2G387076 // GRMZM2G320606 // GRMZM2G306258 // AC196961.2_FG003 // GRMZM2G084195 // GRMZM2G176707
GO:0050789	P	regulation of biological process	72	504	4504	39203	0.033	0.47	// GRMZM2G160687 // GRMZM2G112483 // GRMZM2G137779 // GRMZM5G803355 // GRMZM2G165613 // GRMZM2G104081 // GRMZM2G373738 // GRMZM2G072926 // GRMZM2G037630 // GRMZM2G359952 // GRMZM2G092888 // GRMZM2G134260 // GRMZM2G390641 // GRMZM2G402862 // GRMZM2G315072 // GRMZM2G007453 // GRMZM2G015433 // GRMZM2G033198 // GRMZM2G036567 // GRMZM2G370777 // GRMZM5G805026 // GRMZM2G122076 // GRMZM2G071450 // GRMZM…
GO:0006950	P	response to stress	51	504	3059	39203	0.037	0.52	// GRMZM5G891739 // GRMZM2G033846 // GRMZM2G087094 // GRMZM2G433727 // GRMZM2G150893 // GRMZM2G146809 // GRMZM2G377589 // GRMZM2G084195 // GRMZM5G841893 // GRMZM2G036217 // GRMZM2G118800 // GRMZM2G310569 // GRMZM5G846196 // GRMZM2G162200 // GRMZM2G012966 // GRMZM2G021074 // GRMZM2G320269 // AC203173.3_FG004 // GRMZM2G150134 // AC195587.4_FG004 // GRMZM2G126956 // GRMZM2G041961 // GRMZM2G025854 //…
GO:0008610	P	lipid biosynthetic process	11	504	461	39203	0.04	0.56	// GRMZM5G850019 // GRMZM2G016774 // GRMZM2G102550 // GRMZM2G145029 // GRMZM2G152135 // GRMZM2G101875 // GRMZM2G012966 // GRMZM2G124276 // GRMZM2G425249 // GRMZM2G029912 // GRMZM2G137151
GO:0033692	P	cellular polysaccharide biosynthetic process	6	504	195	39203	0.044	0.61	// GRMZM2G137779 // GRMZM2G142898 // GRMZM2G025854 // GRMZM2G042607 // GRMZM2G171662 // GRMZM2G138060
GO:0015979	P	photosynthesis	5	504	149	39203	0.047	0.65	// GRMZM2G404025 // GRMZM2G143917 // GRMZM2G007453 // GRMZM5G870219 // GRMZM2G472852
GO:0000271	P	polysaccharide biosynthetic process	6	504	201	39203	0.049	0.67	// GRMZM2G137779 // GRMZM2G142898 // GRMZM2G025854 // GRMZM2G042607 // GRMZM2G171662 // GRMZM2G138060
GO:0006260	P	DNA replication	6	504	202	39203	0.05	0.68	// GRMZM2G015011 // GRMZM2G060163 // GRMZM2G117028 // GRMZM2G091595 // GRMZM2G304362 // GRMZM2G026580
GO:0009987	P	cellular process	256	504	18476	39203	0.056	0.73	// GRMZM2G089421 // GRMZM5G803355 // GRMZM2G433727 // GRMZM2G150893 // GRMZM2G373738 // GRMZM2G092704 // GRMZM2G037630 // GRMZM2G001530 // GRMZM2G320941 // GRMZM2G030731 // GRMZM2G425249 // GRMZM2G111462 // GRMZM2G072690 // GRMZM2G015433 // GRMZM2G090241 // GRMZM2G056903 // GRMZM2G039930 // GRMZM2G145753 // GRMZM2G137151 // GRMZM2G060163 // GRMZM5G891739 // GRMZM2G145029 // GRMZM2G022514 // GRMZM…
GO:0006333	P	chromatin assembly or disassembly	9	504	372	39203	0.056	0.73	// GRMZM2G071959 // GRMZM2G070444 // GRMZM2G046055 // GRMZM2G387076 // GRMZM2G320606 // GRMZM2G306258 // AC196961.2_FG003 // GRMZM2G084195 // GRMZM2G176707
GO:0015992	P	proton transport	6	504	209	39203	0.057	0.74	// GRMZM2G701207 // GRMZM2G047476 // GRMZM2G000223 // GRMZM2G321725 // GRMZM2G341405 // GRMZM2G131431
GO:0006818	P	hydrogen transport	6	504	209	39203	0.057	0.74	// GRMZM2G701207 // GRMZM2G047476 // GRMZM2G000223 // GRMZM2G321725 // GRMZM2G341405 // GRMZM2G131431
GO:0034728	P	nucleosome organization	8	504	322	39203	0.061	0.76	// GRMZM2G071959 // GRMZM2G070444 // GRMZM2G046055 // GRMZM2G387076 // GRMZM2G306258 // AC196961.2_FG003 // GRMZM2G084195 // GRMZM2G176707
GO:0065004	P	protein-DNA complex assembly	8	504	322	39203	0.061	0.76	// GRMZM2G071959 // GRMZM2G070444 // GRMZM2G046055 // GRMZM2G387076 // GRMZM2G306258 // AC196961.2_FG003 // GRMZM2G084195 // GRMZM2G176707
GO:0006334	P	nucleosome assembly	8	504	322	39203	0.061	0.76	// GRMZM2G071959 // GRMZM2G070444 // GRMZM2G046055 // GRMZM2G387076 // GRMZM2G306258 // AC196961.2_FG003 // GRMZM2G084195 // GRMZM2G176707
GO:0006325	P	chromatin organization	10	504	436	39203	0.06	0.76	// GRMZM2G071959 // GRMZM2G070444 // GRMZM2G034288 // GRMZM2G046055 // GRMZM2G387076 // GRMZM2G320606 // GRMZM2G306258 // AC196961.2_FG003 // GRMZM2G084195 // GRMZM2G176707
GO:0071554	P	cell wall organization or biogenesis	7	504	270	39203	0.065	0.79	// GRMZM2G445169 // GRMZM2G102946 // GRMZM2G142898 // GRMZM2G013324 // GRMZM5G804575 // GRMZM2G180023 // GRMZM2G154301
GO:0006753	P	nucleoside phosphate metabolic process	12	504	567	39203	0.068	0.82	// GRMZM2G081682 // GRMZM2G067853 // AC203173.3_FG004 // GRMZM2G060163 // GRMZM2G021074 // GRMZM2G001905 // GRMZM2G321725 // GRMZM2G109472 // GRMZM2G111462 // GRMZM2G304362 // GRMZM2G000223 // GRMZM2G006894
GO:0051276	P	chromosome organization	10	504	446	39203	0.068	0.82	// GRMZM2G071959 // GRMZM2G070444 // GRMZM2G034288 // GRMZM2G046055 // GRMZM2G387076 // GRMZM2G320606 // GRMZM2G306258 // AC196961.2_FG003 // GRMZM2G084195 // GRMZM2G176707
GO:0022900	P	electron transport chain	5	504	167	39203	0.069	0.83	// GRMZM2G404025 // GRMZM2G079381 // GRMZM2G064753 // GRMZM2G010348 // GRMZM2G134738
GO:0012501	P	programmed cell death	5	504	168	39203	0.07	0.83	// GRMZM2G104081 // GRMZM2G305115 // GRMZM2G414540 // GRMZM2G060163 // GRMZM2G165613
GO:0034637	P	cellular carbohydrate biosynthetic process	7	504	285	39203	0.08	0.94	// GRMZM2G137779 // GRMZM2G142898 // GRMZM2G025854 // GRMZM2G347280 // GRMZM2G042607 // GRMZM2G171662 // GRMZM2G138060
GO:0009605	P	response to external stimulus	9	504	405	39203	0.084	0.97	// GRMZM2G093101 // GRMZM2G044963 // GRMZM2G021074 // GRMZM2G404025 // GRMZM2G093175 // GRMZM2G125495 // GRMZM2G025854 // GRMZM2G115105 // GRMZM2G036217
GO:0008104	P	protein localization	5	504	890	39203	0.99	1	// GRMZM2G159950 // GRMZM2G373738 // GRMZM2G118363 // GRMZM2G039900 // GRMZM2G414540
GO:0080090	P	regulation of primary metabolic process	46	504	3595	39203	0.54	1	// GRMZM2G160687 // GRMZM2G112483 // GRMZM5G803355 // GRMZM2G037630 // GRMZM2G359952 // GRMZM2G092888 // GRMZM2G134260 // GRMZM2G390641 // GRMZM2G072926 // GRMZM2G015433 // GRMZM2G036567 // GRMZM2G370777 // GRMZM5G805026 // GRMZM5G816314 // GRMZM2G071450 // GRMZM2G031882 // GRMZM2G105834 // GRMZM5G857944 // GRMZM2G341405 // GRMZM2G105387 // GRMZM2G151763 // GRMZM2G162749 // GRMZM2G315072 // GRMZM…
GO:0019222	P	regulation of metabolic process	48	504	3667	39203	0.47	1	// GRMZM2G160687 // GRMZM2G112483 // GRMZM5G803355 // GRMZM2G037630 // GRMZM2G359952 // GRMZM2G092888 // GRMZM2G134260 // GRMZM2G390641 // GRMZM2G072926 // GRMZM2G007453 // GRMZM2G015433 // GRMZM2G036567 // GRMZM2G370777 // GRMZM5G805026 // GRMZM5G816314 // GRMZM2G071450 // GRMZM2G031882 // GRMZM2G105834 // GRMZM5G857944 // GRMZM2G341405 // GRMZM2G320606 // GRMZM2G105387 // GRMZM2G151763 // GRMZM…
GO:0044282	P	small molecule catabolic process	6	504	405	39203	0.42	1	// GRMZM2G081682 // GRMZM2G046284 // GRMZM2G104081 // GRMZM2G124963 // GRMZM2G081582 // GRMZM2G381051
GO:0055085	P	transmembrane transport	21	504	1420	39203	0.29	1	// GRMZM2G010779 // GRMZM2G158682 // GRMZM2G310569 // GRMZM2G111462 // GRMZM2G047476 // GRMZM2G317270 // GRMZM2G131431 // GRMZM2G111300 // GRMZM2G125495 // GRMZM2G092793 // GRMZM2G166459 // GRMZM2G321725 // GRMZM2G701207 // GRMZM2G115105 // GRMZM2G477741 // GRMZM2G365957 // GRMZM2G180519 // GRMZM2G515874 // GRMZM2G045686 // GRMZM2G420436 // GRMZM2G028521
GO:0009199	P	ribonucleoside triphosphate metabolic process	6	504	354	39203	0.31	1	// AC203173.3_FG004 // GRMZM2G067853 // GRMZM2G321725 // GRMZM2G111462 // GRMZM2G000223 // GRMZM2G006894
GO:0016310	P	phosphorylation	43	504	2743	39203	0.11	1	// GRMZM2G100114 // GRMZM2G104081 // GRMZM2G007477 // GRMZM2G052935 // GRMZM2G308365 // GRMZM2G425249 // AC203966.5_FG003 // GRMZM2G056903 // GRMZM2G145753 // GRMZM2G012966 // GRMZM2G104283 // GRMZM2G064753 // GRMZM2G398559 // GRMZM2G321725 // GRMZM5G823318 // GRMZM2G346132 // GRMZM2G032619 // GRMZM2G089484 // GRMZM2G180023 // GRMZM2G022514 // GRMZM2G431524 // GRMZM2G140082 // GRMZM2G076943 // GR…
GO:0034621	P	cellular macromolecular complex subunit organization	11	504	600	39203	0.16	1	// GRMZM2G071959 // GRMZM2G070444 // GRMZM2G046055 // GRMZM2G387076 // GRMZM2G143917 // GRMZM2G177145 // GRMZM2G306258 // AC196961.2_FG003 // GRMZM2G084195 // GRMZM2G176707 // GRMZM2G033198
GO:0046483	P	heterocycle metabolic process	9	504	797	39203	0.7	1	// GRMZM2G137151 // AC203173.3_FG004 // GRMZM2G067853 // GRMZM2G085381 // GRMZM2G321725 // GRMZM2G109472 // GRMZM2G111462 // GRMZM2G000223 // GRMZM2G006894
GO:0019725	P	cellular homeostasis	6	504	255	39203	0.12	1	// GRMZM2G032763 // GRMZM2G701204 // GRMZM2G067853 // AC189750.4_FG004 // GRMZM2G017419 // GRMZM2G033198
GO:0009205	P	purine ribonucleoside triphosphate metabolic process	6	504	354	39203	0.31	1	// AC203173.3_FG004 // GRMZM2G067853 // GRMZM2G321725 // GRMZM2G111462 // GRMZM2G000223 // GRMZM2G006894
GO:0006281	P	DNA repair	6	504	303	39203	0.2	1	// GRMZM2G126956 // GRMZM2G069856 // GRMZM2G433727 // GRMZM2G377589 // GRMZM2G136219 // GRMZM2G176707
GO:0060255	P	regulation of macromolecule metabolic process	47	504	3632	39203	0.5	1	// GRMZM2G160687 // GRMZM2G112483 // GRMZM5G803355 // GRMZM2G037630 // GRMZM2G359952 // GRMZM2G092888 // GRMZM2G134260 // GRMZM2G390641 // GRMZM2G072926 // GRMZM2G007453 // GRMZM2G015433 // GRMZM2G036567 // GRMZM2G370777 // GRMZM5G805026 // GRMZM5G816314 // GRMZM2G071450 // GRMZM2G031882 // GRMZM2G105834 // GRMZM5G857944 // GRMZM2G341405 // GRMZM2G320606 // GRMZM2G105387 // GRMZM2G151763 // GRMZM…
GO:0046034	P	ATP metabolic process	5	504	321	39203	0.4	1	// GRMZM2G067853 // GRMZM2G321725 // GRMZM2G000223 // GRMZM2G111462 // GRMZM2G006894
GO:0016192	P	vesicle-mediated transport	7	504	397	39203	0.26	1	// GRMZM5G846196 // GRMZM2G414540 // GRMZM2G092704 // AC185466.3_FG001 // GRMZM2G387076 // GRMZM2G072690 // GRMZM2G010146
GO:0065008	P	regulation of biological quality	18	504	2139	39203	0.98	1	// GRMZM5G809695 // GRMZM2G032763 // GRMZM2G137779 // GRMZM2G165613 // GRMZM2G150893 // GRMZM2G305115 // GRMZM2G701204 // GRMZM2G071450 // GRMZM2G001530 // GRMZM2G013324 // GRMZM5G804575 // GRMZM2G115105 // AC189750.4_FG004 // GRMZM2G017419 // GRMZM2G067853 // GRMZM2G410710 // AC213621.5_FG004 // GRMZM2G033198
GO:0019538	P	protein metabolic process	80	504	7175	39203	0.93	1	// GRMZM2G100114 // GRMZM2G030731 // GRMZM2G065868 // GRMZM2G008287 // GRMZM2G038636 // AC203173.3_FG004 // GRMZM2G071450 // GRMZM2G147629 // GRMZM2G007477 // GRMZM2G039106 // GRMZM2G308365 // GRMZM2G315072 // GRMZM2G178822 // GRMZM2G433767 // GRMZM2G441768 // GRMZM5G887303 // GRMZM2G141036 // GRMZM2G129015 // GRMZM2G431524 // GRMZM2G056903 // GRMZM2G039930 // GRMZM2G145753 // GRMZM2G327564 // GR…
GO:0016051	P	carbohydrate biosynthetic process	7	504	293	39203	0.09	1	// GRMZM2G137779 // GRMZM2G142898 // GRMZM2G025854 // GRMZM2G347280 // GRMZM2G042607 // GRMZM2G171662 // GRMZM2G138060
GO:0002376	P	immune system process	5	504	363	39203	0.5	1	// GRMZM2G305115 // GRMZM2G041961 // GRMZM2G087094 // GRMZM2G414540 // GRMZM2G129246
GO:0045184	P	establishment of protein localization	5	504	864	39203	0.99	1	// GRMZM2G159950 // GRMZM2G373738 // GRMZM2G118363 // GRMZM2G039900 // GRMZM2G414540
GO:0022607	P	cellular component assembly	14	504	909	39203	0.29	1	// GRMZM2G071959 // GRMZM2G036567 // GRMZM2G070444 // GRMZM2G046055 // GRMZM2G387076 // GRMZM2G143917 // GRMZM2G177145 // GRMZM2G320606 // GRMZM2G306258 // AC196961.2_FG003 // GRMZM2G084195 // GRMZM2G176707 // GRMZM2G033198 // GRMZM2G071264
GO:0009141	P	nucleoside triphosphate metabolic process	7	504	356	39203	0.18	1	// AC203173.3_FG004 // GRMZM2G067853 // GRMZM2G321725 // GRMZM2G111462 // GRMZM2G304362 // GRMZM2G000223 // GRMZM2G006894
GO:0009144	P	purine nucleoside triphosphate metabolic process	6	504	354	39203	0.31	1	// AC203173.3_FG004 // GRMZM2G067853 // GRMZM2G321725 // GRMZM2G111462 // GRMZM2G000223 // GRMZM2G006894
GO:0006807	P	nitrogen compound metabolic process	88	504	6937	39203	0.57	1	// GRMZM5G803355 // GRMZM2G433727 // GRMZM2G037630 // GRMZM2G359952 // GRMZM2G126732 // GRMZM2G111462 // GRMZM2G079381 // GRMZM2G015433 // GRMZM2G137151 // GRMZM2G060163 // GRMZM2G126956 // GRMZM2G036708 // GRMZM2G321725 // GRMZM5G823318 // GRMZM2G304362 // GRMZM2G341405 // GRMZM2G381051 // GRMZM2G093789 // GRMZM2G092888 // GRMZM2G015011 // GRMZM5G857944 // AC189750.4_FG004 // GRMZM2G018414 // GR…
GO:0044267	P	cellular protein metabolic process	64	504	5860	39203	0.93	1	// GRMZM2G100114 // GRMZM2G030731 // GRMZM2G065868 // GRMZM2G095209 // GRMZM2G327564 // AC203173.3_FG004 // GRMZM2G153602 // GRMZM2G007477 // GRMZM2G039106 // GRMZM2G308365 // GRMZM2G178822 // GRMZM2G441768 // GRMZM5G887303 // GRMZM2G431524 // GRMZM2G056903 // GRMZM2G145753 // GRMZM2G012966 // GRMZM2G104283 // GRMZM2G089819 // GRMZM2G089421 // GRMZM2G071450 // GRMZM2G034288 // GRMZM2G357667 // GR…
GO:0044264	P	cellular polysaccharide metabolic process	6	504	243	39203	0.099	1	// GRMZM2G137779 // GRMZM2G142898 // GRMZM2G025854 // GRMZM2G042607 // GRMZM2G171662 // GRMZM2G138060
GO:0044265	P	cellular macromolecule catabolic process	6	504	653	39203	0.84	1	// GRMZM2G081682 // GRMZM2G000623 // GRMZM2G315072 // GRMZM2G104081 // GRMZM2G441768 // GRMZM2G046284
GO:0044260	P	cellular macromolecule metabolic process	131	504	11296	39203	0.93	1	// GRMZM5G803355 // GRMZM2G433727 // GRMZM2G037630 // GRMZM2G359952 // GRMZM2G030731 // GRMZM2G034288 // GRMZM2G015433 // GRMZM2G056903 // GRMZM2G145753 // GRMZM2G060163 // GRMZM2G398559 // GRMZM2G022514 // GRMZM2G126956 // GRMZM2G025854 // GRMZM2G341405 // GRMZM2G032619 // GRMZM2G089484 // GRMZM2G180023 // GRMZM2G038313 // GRMZM2G076943 // GRMZM2G151955 // GRMZM2G092888 // GRMZM2G171662 // GRMZM…
GO:0065003	P	macromolecular complex assembly	12	504	882	39203	0.46	1	// GRMZM2G071959 // GRMZM2G036567 // GRMZM2G070444 // GRMZM2G046055 // GRMZM2G387076 // GRMZM2G143917 // GRMZM2G177145 // GRMZM2G306258 // AC196961.2_FG003 // GRMZM2G084195 // GRMZM2G176707 // GRMZM2G033198
GO:0065007	P	biological regulation	82	504	6272	39203	0.45	1	// GRMZM2G160687 // GRMZM2G112483 // GRMZM2G137779 // GRMZM5G803355 // GRMZM2G165613 // GRMZM2G104081 // GRMZM2G373738 // GRMZM2G072926 // GRMZM2G018984 // GRMZM2G037630 // GRMZM2G001530 // GRMZM2G092888 // GRMZM2G013324 // GRMZM2G134260 // GRMZM2G390641 // GRMZM2G359952 // GRMZM2G402862 // GRMZM2G315072 // GRMZM2G007453 // GRMZM2G015433 // GRMZM2G033198 // GRMZM5G857944 // GRMZM2G036567 // GRMZM…
GO:0065009	P	regulation of molecular function	5	504	258	39203	0.24	1	// GRMZM2G017419 // AC196090.3_FG006 // GRMZM2G109472 // GRMZM2G162200 // GRMZM2G401374
GO:0016265	P	death	5	504	201	39203	0.12	1	// GRMZM2G104081 // GRMZM2G305115 // GRMZM2G414540 // GRMZM2G060163 // GRMZM2G165613
GO:0009308	P	amine metabolic process	13	504	994	39203	0.51	1	// GRMZM2G315072 // GRMZM2G090241 // GRMZM2G052935 // GRMZM2G124963 // GRMZM2G081582 // GRMZM2G093175 // GRMZM5G887303 // GRMZM2G126732 // GRMZM2G036708 // GRMZM2G085381 // GRMZM5G823318 // AC189750.4_FG004 // GRMZM2G381051
GO:0009309	P	amine biosynthetic process	7	504	348	39203	0.17	1	// GRMZM2G090241 // GRMZM2G052935 // GRMZM2G093175 // GRMZM2G036708 // GRMZM2G085381 // GRMZM5G823318 // AC189750.4_FG004
GO:0006810	P	transport	48	504	3841	39203	0.6	1	// GRMZM2G310569 // GRMZM2G132690 // GRMZM2G373738 // GRMZM2G092704 // GRMZM2G421565 // GRMZM2G111462 // GRMZM2G072690 // GRMZM2G000223 // GRMZM2G420436 // GRMZM5G846196 // GRMZM2G387076 // GRMZM2G126397 // GRMZM2G092793 // GRMZM2G122251 // GRMZM2G131431 // AC185466.3_FG001 // GRMZM5G887216 // GRMZM2G033641 // GRMZM2G321725 // GRMZM2G100650 // GRMZM2G115105 // GRMZM2G341405 // GRMZM2G313009 // GR…
GO:0009889	P	regulation of biosynthetic process	46	504	3393	39203	0.38	1	// GRMZM2G160687 // GRMZM2G112483 // GRMZM5G803355 // GRMZM2G037630 // GRMZM2G359952 // GRMZM2G092888 // GRMZM2G134260 // GRMZM2G390641 // GRMZM2G072926 // GRMZM2G015433 // GRMZM2G036567 // GRMZM2G370777 // GRMZM5G805026 // GRMZM5G816314 // GRMZM2G071450 // GRMZM2G031882 // GRMZM2G105834 // GRMZM5G857944 // GRMZM2G341405 // GRMZM2G105387 // GRMZM2G151763 // GRMZM2G162749 // GRMZM2G315072 // GRMZM…
GO:0009150	P	purine ribonucleotide metabolic process	6	504	391	39203	0.39	1	// AC203173.3_FG004 // GRMZM2G067853 // GRMZM2G321725 // GRMZM2G111462 // GRMZM2G000223 // GRMZM2G006894
GO:0006952	P	defense response	12	504	608	39203	0.1	1	// GRMZM5G809695 // GRMZM2G414540 // GRMZM2G087094 // AC195587.4_FG004 // GRMZM2G150893 // GRMZM2G305115 // GRMZM2G129246 // GRMZM2G146809 // GRMZM2G041961 // GRMZM5G841893 // GRMZM2G047219 // GRMZM2G162200
GO:0043412	P	macromolecule modification	45	504	3252	39203	0.33	1	// GRMZM2G100114 // GRMZM2G095209 // GRMZM2G398559 // GRMZM2G007477 // GRMZM2G308365 // GRMZM2G431524 // GRMZM2G056903 // GRMZM2G145753 // GRMZM2G012966 // GRMZM2G104283 // GRMZM2G089819 // GRMZM2G153602 // GRMZM2G034288 // GRMZM2G022514 // GRMZM2G346132 // GRMZM2G065612 // GRMZM2G032619 // GRMZM2G089484 // GRMZM2G180023 // GRMZM2G140082 // GRMZM2G315072 // GRMZM2G076943 // GRMZM2G151955 // GRMZM…
GO:0009266	P	response to temperature stimulus	11	504	1765	39203	1	1	// GRMZM2G162200 // GRMZM2G310569 // AC203173.3_FG004 // GRMZM2G370777 // GRMZM2G459811 // GRMZM5G828229 // GRMZM2G041961 // GRMZM2G125495 // GRMZM2G025854 // GRMZM2G165919 // GRMZM5G814279
GO:0051234	P	establishment of localization	48	504	3841	39203	0.6	1	// GRMZM2G310569 // GRMZM2G132690 // GRMZM2G373738 // GRMZM2G092704 // GRMZM2G421565 // GRMZM2G111462 // GRMZM2G072690 // GRMZM2G000223 // GRMZM2G420436 // GRMZM5G846196 // GRMZM2G387076 // GRMZM2G126397 // GRMZM2G092793 // GRMZM2G122251 // GRMZM2G131431 // AC185466.3_FG001 // GRMZM5G887216 // GRMZM2G033641 // GRMZM2G321725 // GRMZM2G100650 // GRMZM2G115105 // GRMZM2G341405 // GRMZM2G313009 // GR…
GO:0016070	P	RNA metabolic process	47	504	3121	39203	0.15	1	// GRMZM2G160687 // GRMZM2G112483 // GRMZM5G803355 // GRMZM2G037630 // GRMZM2G359952 // GRMZM2G092888 // GRMZM2G134260 // GRMZM2G390641 // GRMZM2G072926 // GRMZM2G007453 // GRMZM2G015433 // GRMZM2G036567 // GRMZM2G370777 // GRMZM5G805026 // GRMZM5G816314 // GRMZM2G031882 // GRMZM2G105834 // GRMZM5G887303 // GRMZM5G857944 // GRMZM2G341405 // GRMZM2G105387 // GRMZM2G151763 // GRMZM2G322661 // GRMZM…
GO:0008652	P	cellular amino acid biosynthetic process	7	504	324	39203	0.13	1	// GRMZM2G090241 // GRMZM2G052935 // GRMZM2G093175 // GRMZM2G036708 // GRMZM2G085381 // GRMZM5G823318 // AC189750.4_FG004
GO:0044271	P	cellular nitrogen compound biosynthetic process	11	504	549	39203	0.1	1	// GRMZM2G093789 // GRMZM2G137151 // GRMZM2G052935 // GRMZM2G093175 // GRMZM2G036708 // GRMZM2G085381 // GRMZM2G109472 // GRMZM5G823318 // AC189750.4_FG004 // GRMZM2G320099 // GRMZM2G090241
GO:0010556	P	regulation of macromolecule biosynthetic process	45	504	3393	39203	0.44	1	// GRMZM2G160687 // GRMZM2G112483 // GRMZM5G803355 // GRMZM2G037630 // GRMZM2G359952 // GRMZM2G092888 // GRMZM2G134260 // GRMZM2G390641 // GRMZM2G072926 // GRMZM2G015433 // GRMZM2G036567 // GRMZM2G370777 // GRMZM5G805026 // GRMZM5G816314 // GRMZM2G071450 // GRMZM2G031882 // GRMZM2G105834 // GRMZM5G857944 // GRMZM2G341405 // GRMZM2G105387 // GRMZM2G151763 // GRMZM2G162749 // GRMZM2G106548 // GRMZM…
GO:0006350	P	transcription	44	504	3730	39203	0.75	1	// GRMZM2G160687 // GRMZM2G112483 // GRMZM5G803355 // GRMZM2G037630 // GRMZM2G359952 // GRMZM2G092888 // GRMZM2G134260 // GRMZM2G390641 // GRMZM2G072926 // GRMZM2G015433 // GRMZM2G036567 // GRMZM2G370777 // GRMZM5G805026 // GRMZM5G816314 // GRMZM2G031882 // GRMZM2G105834 // GRMZM5G857944 // GRMZM2G341405 // GRMZM2G105387 // GRMZM2G151763 // GRMZM2G322661 // GRMZM2G162749 // GRMZM2G106548 // GRMZM…
GO:0006955	P	immune response	5	504	360	39203	0.49	1	// GRMZM2G305115 // GRMZM2G041961 // GRMZM2G087094 // GRMZM2G414540 // GRMZM2G129246
GO:0045454	P	cell redox homeostasis	5	504	225	39203	0.17	1	// AC189750.4_FG004 // GRMZM2G017419 // GRMZM2G701204 // GRMZM2G032763 // GRMZM2G033198
GO:0044248	P	cellular catabolic process	15	504	806	39203	0.1	1	// GRMZM2G081682 // GRMZM2G000623 // GRMZM2G046284 // AC203173.3_FG004 // GRMZM2G104081 // GRMZM2G124963 // GRMZM2G081582 // GRMZM2G067853 // GRMZM2G036708 // GRMZM2G315072 // GRMZM2G111462 // GRMZM2G441768 // GRMZM2G381051 // GRMZM2G006672 // GRMZM2G006894
GO:0044249	P	cellular biosynthetic process	102	504	7619	39203	0.34	1	// GRMZM2G081582 // GRMZM5G803355 // GRMZM2G037630 // GRMZM2G359952 // GRMZM2G126732 // GRMZM2G030731 // GRMZM2G425249 // GRMZM2G015433 // GRMZM2G137151 // GRMZM2G060163 // GRMZM2G145029 // GRMZM2G036708 // GRMZM2G321725 // GRMZM2G025854 // GRMZM2G304362 // GRMZM2G341405 // GRMZM2G038313 // GRMZM2G093789 // GRMZM2G092888 // GRMZM2G171662 // GRMZM2G015011 // GRMZM2G129246 // GRMZM5G857944 // AC189…
GO:0034641	P	cellular nitrogen compound metabolic process	18	504	1150	39203	0.23	1	// GRMZM2G081682 // GRMZM2G093789 // GRMZM2G315072 // GRMZM2G137151 // GRMZM2G052935 // GRMZM2G124963 // GRMZM2G081582 // GRMZM2G093175 // GRMZM5G887303 // GRMZM2G126732 // GRMZM2G036708 // GRMZM2G085381 // GRMZM2G109472 // GRMZM5G823318 // AC189750.4_FG004 // GRMZM2G320099 // GRMZM2G381051 // GRMZM2G090241
GO:0006163	P	purine nucleotide metabolic process	6	504	404	39203	0.42	1	// AC203173.3_FG004 // GRMZM2G067853 // GRMZM2G321725 // GRMZM2G111462 // GRMZM2G000223 // GRMZM2G006894
GO:0009259	P	ribonucleotide metabolic process	7	504	405	39203	0.27	1	// AC203173.3_FG004 // GRMZM2G067853 // GRMZM2G321725 // GRMZM2G109472 // GRMZM2G111462 // GRMZM2G000223 // GRMZM2G006894
GO:0006139	P	nucleobase, nucleoside, nucleotide and nucleic acid metabolic process	72	504	5979	39203	0.74	1	// GRMZM2G160687 // GRMZM2G112483 // GRMZM2G111462 // GRMZM5G803355 // GRMZM2G433727 // GRMZM5G816314 // GRMZM2G037630 // GRMZM2G377589 // GRMZM2G092888 // GRMZM2G134260 // GRMZM2G390641 // GRMZM2G320606 // GRMZM2G359952 // GRMZM2G072926 // GRMZM2G052581 // GRMZM2G007453 // GRMZM2G015433 // GRMZM2G000223 // GRMZM5G857944 // GRMZM2G036567 // GRMZM2G021074 // GRMZM2G370777 // GRMZM5G805026 // AC203…
GO:0051641	P	cellular localization	5	504	817	39203	0.98	1	// GRMZM2G159950 // GRMZM2G010146 // GRMZM2G118363 // AC185466.3_FG001 // GRMZM2G414540
GO:0051179	P	localization	48	504	3887	39203	0.64	1	// GRMZM2G310569 // GRMZM2G132690 // GRMZM2G373738 // GRMZM2G092704 // GRMZM2G421565 // GRMZM2G111462 // GRMZM2G072690 // GRMZM2G000223 // GRMZM2G420436 // GRMZM5G846196 // GRMZM2G387076 // GRMZM2G126397 // GRMZM2G092793 // GRMZM2G122251 // GRMZM2G131431 // AC185466.3_FG001 // GRMZM5G887216 // GRMZM2G033641 // GRMZM2G321725 // GRMZM2G100650 // GRMZM2G115105 // GRMZM2G341405 // GRMZM2G313009 // GR…
GO:0006508	P	proteolysis	19	504	1613	39203	0.68	1	// GRMZM2G000623 // GRMZM2G439389 // GRMZM2G039930 // GRMZM5G891371 // GRMZM2G433767 // GRMZM2G073908 // GRMZM2G147629 // GRMZM2G015441 // GRMZM2G159016 // GRMZM2G025154 // GRMZM2G315072 // GRMZM2G450659 // GRMZM2G088653 // GRMZM2G062559 // GRMZM2G441768 // AC196090.3_FG006 // GRMZM2G105523 // GRMZM2G141036 // GRMZM2G038636
GO:0015672	P	monovalent inorganic cation transport	9	504	532	39203	0.25	1	// GRMZM2G701207 // GRMZM2G310569 // GRMZM2G131431 // GRMZM2G321725 // GRMZM2G123884 // GRMZM2G341405 // GRMZM2G515874 // GRMZM2G000223 // GRMZM2G047476
GO:0044042	P	glucan metabolic process	5	504	191	39203	0.11	1	// GRMZM2G137779 // GRMZM2G142898 // GRMZM2G013324 // GRMZM2G025854 // GRMZM2G138060
GO:0043687	P	post-translational protein modification	42	504	2929	39203	0.25	1	// GRMZM2G100114 // GRMZM2G095209 // GRMZM2G398559 // GRMZM2G007477 // GRMZM2G308365 // GRMZM2G431524 // GRMZM2G056903 // GRMZM2G145753 // GRMZM2G012966 // GRMZM2G104283 // GRMZM2G089819 // GRMZM2G153602 // GRMZM2G034288 // GRMZM2G022514 // GRMZM2G346132 // GRMZM2G065612 // GRMZM2G032619 // GRMZM2G089484 // GRMZM2G180023 // GRMZM2G140082 // GRMZM2G315072 // GRMZM2G076943 // GRMZM2G151955 // GRMZM…
GO:0006725	P	cellular aromatic compound metabolic process	8	504	410	39203	0.16	1	// GRMZM2G124820 // GRMZM2G153233 // GRMZM2G305115 // GRMZM2G081582 // GRMZM2G085381 // GRMZM2G390641 // GRMZM2G109472 // GRMZM2G036217
GO:0006974	P	response to DNA damage stimulus	7	504	305	39203	0.1	1	// GRMZM2G126956 // GRMZM2G433727 // GRMZM2G069856 // GRMZM2G377589 // GRMZM2G136219 // GRMZM2G176707 // GRMZM2G091595
GO:0034645	P	cellular macromolecule biosynthetic process	72	504	6057	39203	0.78	1	// GRMZM2G160687 // GRMZM2G065868 // GRMZM2G137779 // GRMZM5G803355 // AC203173.3_FG004 // GRMZM2G092888 // GRMZM2G018984 // GRMZM2G037630 // GRMZM2G359952 // GRMZM2G320941 // GRMZM2G134260 // GRMZM2G390641 // GRMZM2G072926 // GRMZM2G091595 // GRMZM2G112483 // GRMZM2G015433 // GRMZM5G857944 // GRMZM2G036567 // GRMZM2G018414 // GRMZM2G370777 // GRMZM5G805026 // GRMZM2G089421 // GRMZM2G071450 // GR…
GO:0009409	P	response to cold	8	504	1758	39203	1	1	// GRMZM2G162200 // GRMZM2G310569 // AC203173.3_FG004 // GRMZM5G828229 // GRMZM2G041961 // GRMZM2G125495 // GRMZM2G025854 // GRMZM2G165919
GO:0006979	P	response to oxidative stress	6	504	315	39203	0.23	1	// GRMZM2G150893 // GRMZM5G891739 // GRMZM2G150134 // GRMZM2G320269 // GRMZM2G329144 // GRMZM2G165919
GO:0055086	P	nucleobase, nucleoside and nucleotide metabolic process	12	504	619	39203	0.11	1	// GRMZM2G081682 // GRMZM2G067853 // AC203173.3_FG004 // GRMZM2G060163 // GRMZM2G021074 // GRMZM2G001905 // GRMZM2G321725 // GRMZM2G109472 // GRMZM2G111462 // GRMZM2G304362 // GRMZM2G000223 // GRMZM2G006894
GO:0033036	P	macromolecule localization	7	504	997	39203	0.97	1	// GRMZM2G126397 // GRMZM2G039900 // GRMZM2G159950 // GRMZM2G373738 // GRMZM2G118363 // GRMZM2G414540 // GRMZM2G100650
GO:0005996	P	monosaccharide metabolic process	6	504	497	39203	0.62	1	// GRMZM2G081682 // GRMZM2G137779 // GRMZM2G104081 // GRMZM2G180889 // GRMZM2G172369 // GRMZM2G046284
GO:0043170	P	macromolecule metabolic process	150	504	12696	39203	0.9	1	// GRMZM5G803355 // GRMZM2G433727 // GRMZM2G147629 // GRMZM2G037630 // GRMZM2G359952 // GRMZM2G030731 // GRMZM2G105834 // GRMZM2G015433 // GRMZM2G056903 // GRMZM2G039930 // GRMZM2G145753 // GRMZM2G060163 // GRMZM2G398559 // GRMZM2G022514 // GRMZM2G041544 // GRMZM2G126956 // GRMZM2G025854 // GRMZM2G341405 // GRMZM2G032619 // GRMZM2G089484 // GRMZM2G180023 // GRMZM2G038313 // GRMZM2G076943 // GRMZM…
GO:0044106	P	cellular amine metabolic process	13	504	898	39203	0.37	1	// GRMZM2G315072 // GRMZM2G090241 // GRMZM2G052935 // GRMZM2G124963 // GRMZM2G081582 // GRMZM2G093175 // GRMZM5G887303 // GRMZM2G126732 // GRMZM2G036708 // GRMZM2G085381 // GRMZM5G823318 // AC189750.4_FG004 // GRMZM2G381051
GO:0043933	P	macromolecular complex subunit organization	12	504	929	39203	0.53	1	// GRMZM2G071959 // GRMZM2G036567 // GRMZM2G070444 // GRMZM2G046055 // GRMZM2G387076 // GRMZM2G143917 // GRMZM2G177145 // GRMZM2G306258 // AC196961.2_FG003 // GRMZM2G084195 // GRMZM2G176707 // GRMZM2G033198
GO:0031326	P	regulation of cellular biosynthetic process	46	504	3393	39203	0.38	1	// GRMZM2G160687 // GRMZM2G112483 // GRMZM5G803355 // GRMZM2G037630 // GRMZM2G359952 // GRMZM2G092888 // GRMZM2G134260 // GRMZM2G390641 // GRMZM2G072926 // GRMZM2G015433 // GRMZM2G036567 // GRMZM2G370777 // GRMZM5G805026 // GRMZM5G816314 // GRMZM2G071450 // GRMZM2G031882 // GRMZM2G105834 // GRMZM5G857944 // GRMZM2G341405 // GRMZM2G105387 // GRMZM2G151763 // GRMZM2G162749 // GRMZM2G315072 // GRMZM…
GO:0031323	P	regulation of cellular metabolic process	46	504	3439	39203	0.41	1	// GRMZM2G160687 // GRMZM2G112483 // GRMZM5G803355 // GRMZM2G037630 // GRMZM2G359952 // GRMZM2G092888 // GRMZM2G134260 // GRMZM2G390641 // GRMZM2G072926 // GRMZM2G015433 // GRMZM2G036567 // GRMZM2G370777 // GRMZM5G805026 // GRMZM5G816314 // GRMZM2G071450 // GRMZM2G031882 // GRMZM2G105834 // GRMZM5G857944 // GRMZM2G341405 // GRMZM2G105387 // GRMZM2G151763 // GRMZM2G162749 // GRMZM2G315072 // GRMZM…
GO:0042592	P	homeostatic process	8	504	2047	39203	1	1	// GRMZM2G032763 // GRMZM2G701204 // GRMZM2G305115 // GRMZM2G071450 // GRMZM2G067853 // AC189750.4_FG004 // GRMZM2G017419 // GRMZM2G033198
GO:0045449	P	regulation of transcription	43	504	3352	39203	0.53	1	// GRMZM2G160687 // GRMZM2G112483 // GRMZM5G803355 // GRMZM2G037630 // GRMZM2G359952 // GRMZM2G092888 // GRMZM2G134260 // GRMZM2G390641 // GRMZM2G072926 // GRMZM2G015433 // GRMZM2G036567 // GRMZM2G370777 // GRMZM5G805026 // GRMZM5G816314 // GRMZM2G031882 // GRMZM2G105834 // GRMZM5G857944 // GRMZM2G341405 // GRMZM2G105387 // GRMZM2G151763 // GRMZM2G162749 // GRMZM2G106548 // GRMZM2G153233 // GRMZM…
GO:0015031	P	protein transport	5	504	864	39203	0.99	1	// GRMZM2G159950 // GRMZM2G373738 // GRMZM2G118363 // GRMZM2G039900 // GRMZM2G414540
GO:0034622	P	cellular macromolecular complex assembly	11	504	553	39203	0.11	1	// GRMZM2G071959 // GRMZM2G070444 // GRMZM2G046055 // GRMZM2G387076 // GRMZM2G143917 // GRMZM2G177145 // GRMZM2G306258 // AC196961.2_FG003 // GRMZM2G084195 // GRMZM2G176707 // GRMZM2G033198
GO:0008219	P	cell death	5	504	201	39203	0.12	1	// GRMZM2G104081 // GRMZM2G305115 // GRMZM2G414540 // GRMZM2G060163 // GRMZM2G165613
GO:0023052	P	signaling	25	504	1673	39203	0.25	1	// GRMZM2G143253 // GRMZM2G137779 // GRMZM2G104081 // GRMZM2G373738 // GRMZM2G390641 // GRMZM2G044963 // GRMZM2G109472 // GRMZM2G341405 // GRMZM2G089484 // GRMZM2G153233 // GRMZM2G102946 // GRMZM2G093101 // GRMZM2G404025 // GRMZM2G384755 // GRMZM2G320941 // GRMZM2G414540 // GRMZM2G047476 // GRMZM2G039900 // GRMZM2G142207 // GRMZM2G475882 // GRMZM2G305115 // GRMZM2G030850 // GRMZM2G129246 // GRMZM…
GO:0006520	P	cellular amino acid metabolic process	13	504	849	39203	0.3	1	// GRMZM2G315072 // GRMZM2G090241 // GRMZM2G052935 // GRMZM2G124963 // GRMZM2G081582 // GRMZM2G093175 // GRMZM5G887303 // GRMZM2G126732 // GRMZM2G036708 // GRMZM2G085381 // GRMZM5G823318 // AC189750.4_FG004 // GRMZM2G381051
GO:0010467	P	gene expression	64	504	6042	39203	0.96	1	// GRMZM2G160687 // GRMZM2G065868 // GRMZM5G803355 // AC203173.3_FG004 // GRMZM2G092888 // GRMZM2G018984 // GRMZM2G037630 // GRMZM2G359952 // GRMZM2G320941 // GRMZM2G134260 // GRMZM2G390641 // GRMZM2G072926 // GRMZM2G112483 // GRMZM2G007453 // GRMZM2G015433 // GRMZM2G039930 // GRMZM2G036567 // GRMZM2G370777 // GRMZM5G805026 // GRMZM2G089421 // GRMZM2G071450 // GRMZM2G031882 // GRMZM2G105834 // GR…
GO:0010468	P	regulation of gene expression	46	504	3419	39203	0.4	1	// GRMZM2G160687 // GRMZM2G112483 // GRMZM5G803355 // GRMZM2G037630 // GRMZM2G359952 // GRMZM2G092888 // GRMZM2G134260 // GRMZM2G390641 // GRMZM2G072926 // GRMZM2G007453 // GRMZM2G015433 // GRMZM2G036567 // GRMZM2G370777 // GRMZM5G805026 // GRMZM5G816314 // GRMZM2G071450 // GRMZM2G031882 // GRMZM2G105834 // GRMZM5G857944 // GRMZM2G341405 // GRMZM2G320606 // GRMZM2G105387 // GRMZM2G151763 // GRMZM…
GO:0006468	P	protein amino acid phosphorylation	34	504	2387	39203	0.3	1	// GRMZM2G100114 // GRMZM2G007477 // GRMZM2G308365 // GRMZM2G431524 // GRMZM2G056903 // GRMZM2G145753 // GRMZM2G012966 // GRMZM2G104283 // GRMZM2G089819 // GRMZM2G398559 // GRMZM2G022514 // GRMZM2G346132 // GRMZM2G032619 // GRMZM2G089484 // GRMZM2G180023 // GRMZM2G140082 // GRMZM2G076943 // GRMZM2G151955 // GRMZM5G854625 // GRMZM2G095209 // GRMZM2G039106 // GRMZM2G388576 // GRMZM2G041544 // GRMZM…
GO:0019318	P	hexose metabolic process	5	504	457	39203	0.7	1	// GRMZM2G081682 // GRMZM2G104081 // GRMZM2G046284 // GRMZM2G137779 // GRMZM2G172369
GO:0019219	P	regulation of nucleobase, nucleoside, nucleotide and nucleic acid metabolic process	44	504	3370	39203	0.48	1	// GRMZM2G160687 // GRMZM2G112483 // GRMZM5G803355 // GRMZM2G037630 // GRMZM2G359952 // GRMZM2G092888 // GRMZM2G134260 // GRMZM2G390641 // GRMZM2G072926 // GRMZM2G015433 // GRMZM2G036567 // GRMZM2G370777 // GRMZM5G805026 // GRMZM5G816314 // GRMZM2G031882 // GRMZM2G105834 // GRMZM5G857944 // GRMZM2G341405 // GRMZM2G105387 // GRMZM2G151763 // GRMZM2G162749 // GRMZM2G106548 // GRMZM2G153233 // GRMZM…
GO:0006464	P	protein modification process	44	504	3113	39203	0.28	1	// GRMZM2G100114 // GRMZM2G095209 // GRMZM2G398559 // GRMZM2G007477 // GRMZM2G308365 // GRMZM2G431524 // GRMZM2G056903 // GRMZM2G145753 // GRMZM2G012966 // GRMZM2G104283 // GRMZM2G089819 // GRMZM2G153602 // GRMZM2G034288 // GRMZM2G022514 // GRMZM2G346132 // GRMZM2G065612 // GRMZM2G032619 // GRMZM2G089484 // GRMZM2G180023 // GRMZM2G140082 // GRMZM2G315072 // GRMZM2G076943 // GRMZM2G151955 // GRMZM…
GO:0009058	P	biosynthetic process	105	504	7998	39203	0.42	1	// GRMZM2G081582 // GRMZM5G803355 // GRMZM2G037630 // GRMZM2G359952 // GRMZM2G126732 // GRMZM2G030731 // GRMZM2G425249 // GRMZM2G015433 // GRMZM2G137151 // GRMZM2G060163 // GRMZM2G145029 // GRMZM2G036708 // GRMZM2G321725 // GRMZM2G025854 // GRMZM2G341405 // GRMZM2G038313 // GRMZM2G093789 // GRMZM2G092888 // GRMZM2G171662 // GRMZM2G015011 // GRMZM2G129246 // GRMZM5G857944 // AC189750.4_FG004 // GR…
GO:0009059	P	macromolecule biosynthetic process	72	504	6064	39203	0.78	1	// GRMZM2G160687 // GRMZM2G065868 // GRMZM2G137779 // GRMZM5G803355 // AC203173.3_FG004 // GRMZM2G092888 // GRMZM2G018984 // GRMZM2G037630 // GRMZM2G359952 // GRMZM2G320941 // GRMZM2G134260 // GRMZM2G390641 // GRMZM2G072926 // GRMZM2G091595 // GRMZM2G112483 // GRMZM2G015433 // GRMZM5G857944 // GRMZM2G036567 // GRMZM2G018414 // GRMZM2G370777 // GRMZM5G805026 // GRMZM2G089421 // GRMZM2G071450 // GR…
GO:0009117	P	nucleotide metabolic process	11	504	567	39203	0.12	1	// GRMZM2G081682 // AC203173.3_FG004 // GRMZM2G060163 // GRMZM2G021074 // GRMZM2G067853 // GRMZM2G321725 // GRMZM2G109472 // GRMZM2G111462 // GRMZM2G304362 // GRMZM2G000223 // GRMZM2G006894
GO:0051171	P	regulation of nitrogen compound metabolic process	45	504	3370	39203	0.42	1	// GRMZM2G160687 // GRMZM2G112483 // GRMZM5G803355 // GRMZM2G037630 // GRMZM2G359952 // GRMZM2G092888 // GRMZM2G134260 // GRMZM2G390641 // GRMZM2G072926 // GRMZM2G015433 // GRMZM2G036567 // GRMZM2G370777 // GRMZM5G805026 // GRMZM5G816314 // GRMZM2G031882 // GRMZM2G105834 // GRMZM5G857944 // GRMZM2G341405 // GRMZM2G105387 // GRMZM2G151763 // GRMZM2G162749 // GRMZM2G315072 // GRMZM2G153233 // GRMZM…
GO:0051649	P	establishment of localization in cell	5	504	791	39203	0.97	1	// GRMZM2G159950 // GRMZM2G010146 // GRMZM2G118363 // AC185466.3_FG001 // GRMZM2G414540
GO:0044262	P	cellular carbohydrate metabolic process	14	504	959	39203	0.35	1	// GRMZM2G081682 // GRMZM2G138060 // GRMZM2G104081 // GRMZM2G180889 // GRMZM2G347280 // GRMZM2G013324 // GRMZM2G025854 // GRMZM2G139157 // GRMZM2G042607 // GRMZM2G172369 // GRMZM2G046284 // GRMZM2G142898 // GRMZM2G171662 // GRMZM2G137779
GO:0007264	P	small GTPase mediated signal transduction	5	504	441	39203	0.67	1	// GRMZM2G373738 // GRMZM2G109472 // GRMZM2G102946 // GRMZM2G039900 // GRMZM2G047476
GO:0009056	P	catabolic process	17	504	1005	39203	0.16	1	// GRMZM2G081682 // GRMZM2G000623 // GRMZM2G046284 // AC203173.3_FG004 // GRMZM2G104081 // GRMZM2G124963 // GRMZM2G081582 // GRMZM2G067853 // GRMZM2G036708 // GRMZM2G315072 // GRMZM2G111462 // GRMZM2G441768 // GRMZM2G381051 // GRMZM2G006672 // GRMZM2G180023 // GRMZM2G006894 // GRMZM2G154301
GO:0009057	P	macromolecule catabolic process	6	504	776	39203	0.93	1	// GRMZM2G081682 // GRMZM2G000623 // GRMZM2G315072 // GRMZM2G104081 // GRMZM2G441768 // GRMZM2G046284
GO:0006091	P	generation of precursor metabolites and energy	10	504	705	39203	0.42	1	// GRMZM2G134738 // GRMZM2G104081 // GRMZM2G064753 // GRMZM2G010348 // GRMZM2G404025 // GRMZM2G321725 // GRMZM2G143917 // GRMZM2G079381 // GRMZM2G046284 // GRMZM2G006672
GO:0044238	P	primary metabolic process	208	504	15885	39203	0.38	1	// GRMZM2G089421 // GRMZM5G803355 // GRMZM2G115621 // GRMZM2G147629 // GRMZM2G037630 // GRMZM2G359952 // GRMZM2G320941 // GRMZM2G030731 // GRMZM2G425249 // GRMZM2G111462 // GRMZM2G015433 // GRMZM2G090241 // GRMZM2G056903 // GRMZM2G039930 // GRMZM2G145753 // GRMZM2G137151 // GRMZM2G060163 // GRMZM2G433727 // GRMZM2G145029 // GRMZM2G022514 // GRMZM2G041544 // GRMZM2G126956 // GRMZM2G036708 // GRMZM…
GO:0006519	P	cellular amino acid and derivative metabolic process	17	504	985	39203	0.14	1	// GRMZM2G315072 // GRMZM2G153233 // GRMZM2G090241 // GRMZM2G052935 // GRMZM2G124963 // GRMZM2G081582 // GRMZM2G093175 // GRMZM5G887303 // GRMZM2G126732 // GRMZM2G036708 // GRMZM2G085381 // GRMZM2G390641 // GRMZM5G823318 // AC189750.4_FG004 // GRMZM2G381051 // GRMZM2G036217 // GRMZM2G305115
GO:0005975	P	carbohydrate metabolic process	26	504	1828	39203	0.33	1	// GRMZM2G137779 // GRMZM2G115621 // GRMZM2G104081 // GRMZM2G013324 // GRMZM2G138060 // GRMZM2G142898 // GRMZM2G473711 // GRMZM2G060023 // GRMZM2G041961 // GRMZM2G025854 // GRMZM2G347280 // GRMZM2G172369 // GRMZM2G046284 // GRMZM2G081729 // GRMZM2G081682 // GRMZM2G108133 // GRMZM2G019185 // GRMZM2G171662 // GRMZM2G029243 // GRMZM2G139157 // GRMZM2G030850 // GRMZM2G180889 // GRMZM2G111324 // GRMZM…
GO:0050790	P	regulation of catalytic activity	5	504	255	39203	0.24	1	// GRMZM2G017419 // AC196090.3_FG006 // GRMZM2G109472 // GRMZM2G162200 // GRMZM2G401374
GO:0005976	P	polysaccharide metabolic process	7	504	328	39203	0.14	1	// GRMZM2G138060 // GRMZM2G142898 // GRMZM2G013324 // GRMZM2G025854 // GRMZM2G042607 // GRMZM2G171662 // GRMZM2G137779
GO:0044237	P	cellular metabolic process	191	504	14490	39203	0.35	1	// GRMZM2G089421 // GRMZM5G803355 // GRMZM2G433727 // GRMZM2G037630 // GRMZM2G359952 // GRMZM2G320941 // GRMZM2G030731 // GRMZM2G425249 // GRMZM2G111462 // GRMZM2G079381 // GRMZM2G015433 // GRMZM2G090241 // GRMZM2G056903 // GRMZM2G145753 // GRMZM2G137151 // GRMZM2G060163 // GRMZM5G891739 // GRMZM2G145029 // GRMZM2G022514 // GRMZM2G126956 // GRMZM2G036708 // GRMZM2G321725 // GRMZM2G025854 // GRMZM…
GO:0006066	P	alcohol metabolic process	8	504	729	39203	0.72	1	// GRMZM2G081682 // GRMZM5G850019 // GRMZM2G104081 // GRMZM2G180889 // GRMZM2G013324 // GRMZM2G172369 // GRMZM2G046284 // GRMZM2G137779
GO:0006796	P	phosphate metabolic process	46	504	2994	39203	0.12	1	// GRMZM2G100114 // GRMZM2G104081 // GRMZM2G007477 // GRMZM2G052935 // GRMZM2G308365 // GRMZM2G425249 // AC203966.5_FG003 // GRMZM2G056903 // GRMZM2G145753 // GRMZM2G012966 // GRMZM2G104283 // GRMZM2G064753 // GRMZM2G153602 // GRMZM2G321725 // GRMZM5G823318 // GRMZM2G346132 // GRMZM2G022514 // GRMZM2G032619 // GRMZM2G089484 // GRMZM2G180023 // GRMZM2G398559 // GRMZM2G431524 // GRMZM2G140082 // GR…
GO:0044085	P	cellular component biogenesis	16	504	1037	39203	0.27	1	// GRMZM2G071959 // GRMZM2G036567 // GRMZM2G070444 // GRMZM2G142898 // GRMZM2G046055 // GRMZM2G387076 // GRMZM2G143917 // GRMZM2G177145 // GRMZM5G804575 // GRMZM2G320606 // GRMZM2G306258 // AC196961.2_FG003 // GRMZM2G084195 // GRMZM2G176707 // GRMZM2G033198 // GRMZM2G071264
GO:0006793	P	phosphorus metabolic process	46	504	2995	39203	0.12	1	// GRMZM2G100114 // GRMZM2G104081 // GRMZM2G007477 // GRMZM2G052935 // GRMZM2G308365 // GRMZM2G425249 // AC203966.5_FG003 // GRMZM2G056903 // GRMZM2G145753 // GRMZM2G012966 // GRMZM2G104283 // GRMZM2G064753 // GRMZM2G153602 // GRMZM2G321725 // GRMZM5G823318 // GRMZM2G346132 // GRMZM2G022514 // GRMZM2G032619 // GRMZM2G089484 // GRMZM2G180023 // GRMZM2G398559 // GRMZM2G431524 // GRMZM2G140082 // GR…
GO:0006259	P	DNA metabolic process	13	504	828	39203	0.27	1	// GRMZM2G126956 // GRMZM2G433727 // GRMZM2G060163 // GRMZM2G015011 // GRMZM2G377589 // GRMZM2G136219 // GRMZM2G117028 // GRMZM2G069856 // GRMZM2G026580 // GRMZM2G176707 // GRMZM2G052581 // GRMZM2G304362 // GRMZM2G091595
GO:0006412	P	translation	16	504	1871	39203	0.97	1	// GRMZM2G030731 // GRMZM2G065868 // GRMZM2G129015 // GRMZM2G327564 // AC203173.3_FG004 // GRMZM2G166963 // GRMZM2G038313 // GRMZM2G089421 // GRMZM2G071450 // GRMZM5G887303 // GRMZM2G077208 // GRMZM2G047476 // GRMZM2G143917 // GRMZM2G028883 // GRMZM2G305154 // GRMZM2G104025
GO:0003682	F	chromatin binding	10	504	50	39203	4.2e-09	2.3e-06	// GRMZM2G093789 // GRMZM2G127490 // GRMZM2G035370 // GRMZM5G803355 // GRMZM2G414159 // GRMZM2G315506 // GRMZM2G001530 // GRMZM2G143046 // GRMZM2G176707 // GRMZM2G395749
GO:0016705	F	oxidoreductase activity, acting on paired donors, with incorporation or reduction of molecular oxygen	15	504	180	39203	3.6e-08	9.8e-06	// GRMZM2G127668 // GRMZM5G850019 // GRMZM2G110369 // GRMZM5G872368 // GRMZM2G064701 // GRMZM2G023952 // GRMZM2G139467 // GRMZM2G126732 // GRMZM2G127232 // GRMZM5G883417 // GRMZM2G010468 // GRMZM2G056247 // GRMZM2G382569 // GRMZM2G180082 // GRMZM2G012966
GO:0005515	F	protein binding	100	504	4766	39203	7.2e-07	0.00013	// GRMZM2G091916 // GRMZM2G433727 // GRMZM2G165063 // GRMZM2G151616 // GRMZM2G359952 // GRMZM2G028766 // GRMZM2G007021 // GRMZM2G145753 // AC183315.4_FG006 // GRMZM2G126956 // GRMZM2G099238 // GRMZM2G341405 // GRMZM2G032619 // GRMZM2G063188 // GRMZM2G038313 // GRMZM2G071959 // GRMZM2G061396 // GRMZM2G084195 // GRMZM2G417125 // AC196090.3_FG006 // GRMZM2G015011 // GRMZM2G142207 // GRMZM2G138338 //…
GO:0046983	F	protein dimerization activity	23	504	745	39203	0.00016	0.021	// GRMZM2G160687 // GRMZM2G359952 // GRMZM2G390641 // GRMZM2G071959 // GRMZM2G112629 // GRMZM2G370777 // GRMZM2G387076 // AC149829.2_FG004 // GRMZM2G105387 // GRMZM2G153233 // GRMZM2G097190 // GRMZM2G135018 // GRMZM2G017414 // AC196961.2_FG003 // GRMZM2G084195 // GRMZM2G150729 // GRMZM2G070444 // GRMZM2G475882 // GRMZM2G107276 // GRMZM2G046055 // GRMZM2G306258 // GRMZM2G008898 // GRMZM5G814279
GO:0005507	F	copper ion binding	10	504	194	39203	0.00031	0.034	// AC203173.3_FG004 // GRMZM2G124963 // GRMZM2G071450 // GRMZM2G010348 // GRMZM2G082940 // GRMZM2G036708 // GRMZM2G176397 // GRMZM2G126732 // GRMZM2G047219 // GRMZM2G172642
GO:0042802	F	identical protein binding	6	504	79	39203	0.00076	0.07	// GRMZM2G015011 // GRMZM2G176707 // GRMZM2G052581 // GRMZM2G097190 // AC196090.3_FG006 // GRMZM5G814279
GO:0016903	F	oxidoreductase activity, acting on the aldehyde or oxo group of donors	5	504	68	39203	0.0024	0.19	// GRMZM2G120987 // GRMZM2G097226 // GRMZM2G036217 // GRMZM2G118800 // GRMZM2G155502
GO:0016491	F	oxidoreductase activity	59	504	3266	39203	0.0058	0.4	// GRMZM2G150893 // GRMZM5G850019 // GRMZM2G320269 // GRMZM2G110369 // GRMZM5G872368 // GRMZM2G090241 // GRMZM2G079381 // GRMZM2G010468 // GRMZM2G036217 // GRMZM2G118800 // GRMZM2G180082 // GRMZM2G033198 // GRMZM2G155502 // GRMZM2G127668 // GRMZM2G139512 // GRMZM2G012966 // GRMZM2G074114 // GRMZM2G060163 // GRMZM2G064753 // GRMZM5G891739 // GRMZM2G023952 // GRMZM2G150134 // GRMZM2G152135 // GRMZM…
GO:0003700	F	transcription factor activity	29	504	1390	39203	0.0087	0.53	// GRMZM2G160687 // GRMZM2G112483 // GRMZM2G036567 // GRMZM2G037630 // GRMZM2G359952 // GRMZM2G134260 // GRMZM2G072926 // GRMZM2G015433 // GRMZM2G370777 // GRMZM5G805026 // GRMZM2G031882 // GRMZM2G105834 // GRMZM5G857944 // GRMZM2G105387 // GRMZM2G151763 // GRMZM2G122076 // GRMZM2G135018 // GRMZM5G816314 // GRMZM2G402862 // GRMZM2G351232 // GRMZM2G158328 // GRMZM5G863420 // GRMZM2G063880 // GRMZM…
GO:0022890	F	inorganic cation transmembrane transporter activity	12	504	431	39203	0.012	0.59	// GRMZM2G701207 // GRMZM2G134738 // GRMZM2G317270 // GRMZM2G064753 // GRMZM2G084779 // GRMZM2G111300 // GRMZM2G067853 // GRMZM2G321725 // GRMZM2G420436 // GRMZM2G131431 // GRMZM2G006894 // GRMZM2G047476
GO:0019829	F	cation-transporting ATPase activity	5	504	101	39203	0.011	0.59	// GRMZM2G067853 // GRMZM2G317270 // GRMZM2G321725 // GRMZM2G701207 // GRMZM2G006894
GO:0043492	F	ATPase activity, coupled to movement of substances	9	504	300	39203	0.018	0.76	// GRMZM2G067853 // GRMZM2G365957 // GRMZM2G701207 // GRMZM2G079777 // GRMZM2G317270 // GRMZM2G021635 // GRMZM2G321725 // GRMZM2G111462 // GRMZM2G006894
GO:0042626	F	ATPase activity, coupled to transmembrane movement of substances	9	504	300	39203	0.018	0.76	// GRMZM2G067853 // GRMZM2G365957 // GRMZM2G701207 // GRMZM2G079777 // GRMZM2G317270 // GRMZM2G021635 // GRMZM2G321725 // GRMZM2G111462 // GRMZM2G006894
GO:0004497	F	monooxygenase activity	6	504	553	39203	0.71	1	// GRMZM2G023952 // GRMZM2G152135 // GRMZM2G010468 // GRMZM2G056247 // GRMZM2G139467 // GRMZM2G180082
GO:0046872	F	metal ion binding	90	504	6652	39203	0.32	1	// GRMZM2G150893 // GRMZM2G165063 // GRMZM2G151616 // GRMZM2G010348 // GRMZM2G036099 // GRMZM5G870219 // GRMZM2G028766 // GRMZM5G887216 // GRMZM2G139512 // GRMZM2G060163 // GRMZM5G891739 // GRMZM2G023952 // GRMZM2G126956 // GRMZM2G036708 // GRMZM2G321725 // GRMZM2G025854 // GRMZM2G099238 // GRMZM5G883417 // GRMZM2G172369 // GRMZM2G313009 // AC200210.1_FG006 // GRMZM2G130379 // GRMZM2G417125 // GR…
GO:0019001	F	guanyl nucleotide binding	5	504	784	39203	0.97	1	// GRMZM2G047476 // GRMZM2G373738 // GRMZM2G102946 // GRMZM2G039900 // AC203173.3_FG004
GO:0043169	F	cation binding	91	504	6664	39203	0.28	1	// GRMZM2G150893 // GRMZM2G165063 // GRMZM2G151616 // GRMZM2G010348 // GRMZM2G036099 // GRMZM5G870219 // GRMZM2G028766 // GRMZM5G887216 // GRMZM2G139512 // GRMZM2G060163 // GRMZM5G891739 // GRMZM2G023952 // GRMZM2G126956 // GRMZM2G036708 // GRMZM2G321725 // GRMZM2G025854 // GRMZM2G099238 // GRMZM5G883417 // GRMZM2G172369 // GRMZM2G313009 // AC200210.1_FG006 // GRMZM2G130379 // GRMZM2G417125 // GR…
GO:0008236	F	serine-type peptidase activity	8	504	511	39203	0.34	1	// GRMZM2G039930 // GRMZM2G433767 // GRMZM2G147629 // GRMZM2G159016 // GRMZM2G025154 // GRMZM5G891371 // AC196090.3_FG006 // GRMZM2G073908
GO:0060089	F	molecular transducer activity	5	504	1377	39203	1	1	// GRMZM2G341405 // GRMZM2G320941 // GRMZM2G125495 // GRMZM2G089484 // GRMZM2G148807
GO:0003735	F	structural constituent of ribosome	11	504	1378	39203	0.97	1	// GRMZM2G030731 // GRMZM2G065868 // GRMZM2G129015 // GRMZM2G327564 // GRMZM2G089421 // GRMZM2G166963 // GRMZM2G077208 // GRMZM2G047476 // GRMZM2G028883 // GRMZM2G305154 // GRMZM2G104025
GO:0022857	F	transmembrane transporter activity	27	504	1672	39203	0.14	1	// GRMZM2G310569 // GRMZM2G421565 // GRMZM2G111462 // GRMZM2G131431 // GRMZM2G420436 // GRMZM2G021635 // GRMZM2G092793 // GRMZM2G079777 // GRMZM2G064753 // GRMZM2G321725 // GRMZM2G115105 // GRMZM2G341405 // GRMZM2G006894 // GRMZM2G477741 // GRMZM2G084779 // GRMZM2G047476 // GRMZM2G010779 // GRMZM2G365957 // GRMZM2G701207 // GRMZM2G134738 // GRMZM2G317270 // GRMZM2G111300 // GRMZM2G148807 // GRMZM…
GO:0016209	F	antioxidant activity	5	504	374	39203	0.53	1	// GRMZM2G150893 // GRMZM2G329144 // GRMZM5G891739 // GRMZM2G150134 // GRMZM2G320269
GO:0004672	F	protein kinase activity	34	504	2423	39203	0.33	1	// GRMZM2G100114 // GRMZM2G007477 // GRMZM2G308365 // GRMZM2G431524 // GRMZM2G056903 // GRMZM2G145753 // GRMZM2G012966 // GRMZM2G104283 // GRMZM2G089819 // GRMZM2G398559 // GRMZM2G022514 // GRMZM2G346132 // GRMZM2G032619 // GRMZM2G089484 // GRMZM2G180023 // GRMZM2G140082 // GRMZM2G076943 // GRMZM2G151955 // GRMZM5G854625 // GRMZM2G095209 // GRMZM2G039106 // GRMZM2G388576 // GRMZM2G041544 // GRMZM…
GO:0016746	F	transferase activity, transferring acyl groups	8	504	437	39203	0.21	1	// GRMZM2G106245 // GRMZM2G701207 // GRMZM2G152895 // GRMZM5G860137 // GRMZM2G177150 // GRMZM2G159641 // GRMZM2G314898 // GRMZM2G050641
GO:0016614	F	oxidoreductase activity, acting on CH-OH group of donors	5	504	441	39203	0.67	1	// GRMZM2G348846 // GRMZM2G141473 // GRMZM2G006672 // GRMZM2G171662 // GRMZM2G112792
GO:0042578	F	phosphoric ester hydrolase activity	9	504	446	39203	0.13	1	// GRMZM2G416491 // GRMZM2G093101 // GRMZM2G347280 // GRMZM2G069856 // GRMZM2G153602 // GRMZM2G001905 // GRMZM2G013324 // GRMZM2G092888 // GRMZM5G836174
GO:0016818	F	hydrolase activity, acting on acid anhydrides, in phosphorus-containing anhydrides	20	504	1958	39203	0.88	1	// GRMZM2G001905 // GRMZM2G365957 // GRMZM2G067853 // GRMZM2G079777 // AC203173.3_FG004 // GRMZM2G026580 // GRMZM2G317270 // GRMZM2G069856 // GRMZM2G021635 // GRMZM2G136219 // GRMZM2G015395 // GRMZM2G321725 // GRMZM2G701207 // GRMZM2G111462 // GRMZM2G355523 // GRMZM2G341405 // GRMZM2G018414 // GRMZM2G363408 // GRMZM2G006894 // GRMZM2G101693
GO:0030554	F	adenyl nucleotide binding	62	504	5398	39203	0.85	1	// GRMZM2G100114 // GRMZM2G026580 // GRMZM2G104081 // GRMZM2G007477 // GRMZM2G308365 // GRMZM2G111462 // GRMZM2G052581 // GRMZM2G105933 // GRMZM5G887303 // GRMZM2G376708 // GRMZM2G431524 // GRMZM2G056903 // GRMZM2G145753 // GRMZM2G012966 // GRMZM2G104283 // GRMZM2G136219 // GRMZM2G398559 // GRMZM2G162200 // GRMZM2G089819 // GRMZM2G117028 // GRMZM2G022514 // GRMZM2G346132 // GRMZM2G097190 // GRMZM…
GO:0016798	F	hydrolase activity, acting on glycosyl bonds	14	504	821	39203	0.18	1	// GRMZM2G477236 // GRMZM2G138060 // GRMZM2G108133 // GRMZM2G030850 // GRMZM2G473711 // GRMZM2G180889 // GRMZM2G111324 // GRMZM2G060023 // GRMZM2G084940 // GRMZM2G041961 // GRMZM2G019185 // GRMZM2G172369 // GRMZM2G081729 // GRMZM2G029243
GO:0022804	F	active transmembrane transporter activity	17	504	825	39203	0.042	1	// GRMZM2G010779 // GRMZM2G365957 // GRMZM2G067853 // GRMZM2G111462 // GRMZM2G079777 // GRMZM2G317270 // GRMZM2G421565 // GRMZM2G021635 // GRMZM2G166459 // GRMZM2G321725 // GRMZM2G115105 // GRMZM2G123884 // GRMZM2G341405 // GRMZM2G701207 // GRMZM2G084779 // GRMZM2G006894 // GRMZM2G092793
GO:0015405	F	P-P-bond-hydrolysis-driven transmembrane transporter activity	10	504	394	39203	0.035	1	// GRMZM2G067853 // GRMZM2G365957 // GRMZM2G701207 // GRMZM2G079777 // GRMZM2G317270 // GRMZM2G021635 // GRMZM2G321725 // GRMZM2G111462 // GRMZM2G341405 // GRMZM2G006894
GO:0016817	F	hydrolase activity, acting on acid anhydrides	20	504	1980	39203	0.89	1	// GRMZM2G001905 // GRMZM2G365957 // GRMZM2G067853 // GRMZM2G079777 // AC203173.3_FG004 // GRMZM2G026580 // GRMZM2G317270 // GRMZM2G069856 // GRMZM2G021635 // GRMZM2G136219 // GRMZM2G015395 // GRMZM2G321725 // GRMZM2G701207 // GRMZM2G111462 // GRMZM2G355523 // GRMZM2G341405 // GRMZM2G018414 // GRMZM2G363408 // GRMZM2G006894 // GRMZM2G101693
GO:0016881	F	acid-amino acid ligase activity	5	504	390	39203	0.56	1	// GRMZM2G341405 // GRMZM2G065612 // GRMZM2G315072 // GRMZM2G425965 // GRMZM2G139157
GO:0003676	F	nucleic acid binding	82	504	8298	39203	1	1	// GRMZM2G122076 // GRMZM2G160687 // GRMZM2G112483 // GRMZM5G803355 // AC203173.3_FG004 // GRMZM2G093947 // GRMZM2G472052 // GRMZM2G030529 // GRMZM2G037630 // GRMZM2G001530 // GRMZM2G084195 // GRMZM2G454472 // GRMZM2G134260 // GRMZM2G390641 // GRMZM2G359952 // GRMZM2G072926 // GRMZM2G052581 // GRMZM2G476933 // GRMZM2G007453 // GRMZM2G015433 // GRMZM2G412075 // GRMZM2G126956 // GRMZM2G010290 // GR…
GO:0003677	F	DNA binding	65	504	5003	39203	0.48	1	// GRMZM2G160687 // GRMZM2G112483 // GRMZM5G803355 // GRMZM2G454472 // GRMZM2G030529 // GRMZM2G037630 // GRMZM2G001530 // GRMZM2G134260 // GRMZM2G390641 // GRMZM2G359952 // GRMZM2G072926 // GRMZM2G052581 // GRMZM2G476933 // GRMZM2G015433 // GRMZM2G010290 // GRMZM5G857944 // GRMZM2G036567 // GRMZM2G370777 // GRMZM5G805026 // GRMZM5G816314 // GRMZM2G031882 // GRMZM2G105834 // GRMZM2G387076 // GRMZM…
GO:0008168	F	methyltransferase activity	7	504	471	39203	0.4	1	// GRMZM2G060070 // GRMZM2G010056 // GRMZM2G405947 // GRMZM2G034288 // GRMZM2G008287 // GRMZM2G442804 // GRMZM2G100315
GO:0020037	F	heme binding	11	504	876	39203	0.57	1	// GRMZM2G150893 // GRMZM5G872368 // GRMZM2G320269 // GRMZM2G023952 // GRMZM2G010348 // GRMZM2G150134 // GRMZM2G079381 // GRMZM2G010468 // GRMZM2G056247 // GRMZM2G139467 // GRMZM2G180082
GO:0042623	F	ATPase activity, coupled	9	504	579	39203	0.33	1	// GRMZM2G067853 // GRMZM2G365957 // GRMZM2G701207 // GRMZM2G079777 // GRMZM2G317270 // GRMZM2G021635 // GRMZM2G321725 // GRMZM2G111462 // GRMZM2G006894
GO:0015399	F	primary active transmembrane transporter activity	10	504	394	39203	0.035	1	// GRMZM2G067853 // GRMZM2G365957 // GRMZM2G701207 // GRMZM2G079777 // GRMZM2G317270 // GRMZM2G021635 // GRMZM2G321725 // GRMZM2G111462 // GRMZM2G341405 // GRMZM2G006894
GO:0017076	F	purine nucleotide binding	67	504	6079	39203	0.93	1	// GRMZM2G100114 // AC203173.3_FG004 // GRMZM2G026580 // GRMZM2G104081 // GRMZM2G373738 // GRMZM2G007477 // GRMZM2G308365 // GRMZM2G111462 // GRMZM2G052581 // GRMZM2G105933 // GRMZM5G887303 // GRMZM2G376708 // GRMZM2G102946 // GRMZM2G431524 // GRMZM2G056903 // GRMZM2G145753 // GRMZM2G012966 // GRMZM2G104283 // GRMZM2G136219 // GRMZM2G398559 // GRMZM2G162200 // GRMZM2G089819 // GRMZM2G117028 // GR…
GO:0005524	F	ATP binding	57	504	5133	39203	0.9	1	// GRMZM2G100114 // GRMZM2G026580 // GRMZM2G104081 // GRMZM2G007477 // GRMZM2G308365 // GRMZM2G111462 // GRMZM2G052581 // GRMZM5G887303 // GRMZM2G431524 // GRMZM2G056903 // GRMZM2G145753 // GRMZM2G012966 // GRMZM2G104283 // GRMZM2G089819 // GRMZM2G398559 // GRMZM2G162200 // GRMZM2G117028 // GRMZM2G022514 // GRMZM2G346132 // GRMZM2G097190 // GRMZM2G032619 // GRMZM2G381051 // GRMZM2G089484 // GRMZM…
GO:0016787	F	hydrolase activity	86	504	6078	39203	0.18	1	// GRMZM2G336879 // GRMZM2G473711 // GRMZM2G111462 // GRMZM2G039930 // GRMZM2G031447 // GRMZM2G145029 // GRMZM2G579719 // GRMZM2G041961 // GRMZM2G321725 // GRMZM2G071249 // GRMZM2G341405 // GRMZM2G172369 // GRMZM2G081729 // GRMZM2G090419 // GRMZM2G092888 // GRMZM2G073908 // GRMZM2G065471 // GRMZM2G088653 // GRMZM2G045433 // GRMZM2G015441 // GRMZM2G159016 // GRMZM2G018414 // GRMZM2G363408 // AC203…
GO:0046914	F	transition metal ion binding	66	504	5507	39203	0.75	1	// GRMZM2G150893 // GRMZM5G850019 // AC203173.3_FG004 // GRMZM2G320269 // GRMZM2G104081 // GRMZM5G872368 // GRMZM2G165063 // GRMZM2G151616 // GRMZM2G116574 // GRMZM2G130379 // GRMZM2G152135 // GRMZM2G028766 // GRMZM2G079381 // GRMZM2G010468 // GRMZM2G131611 // GRMZM2G007453 // GRMZM5G854499 // GRMZM2G180082 // GRMZM2G126956 // GRMZM2G122706 // GRMZM2G139512 // GRMZM2G140299 // GRMZM2G060163 // GR…
GO:0016788	F	hydrolase activity, acting on ester bonds	23	504	1355	39203	0.11	1	// GRMZM2G069856 // GRMZM2G153602 // GRMZM2G001905 // GRMZM2G013324 // GRMZM2G069503 // GRMZM2G100822 // GRMZM2G579719 // GRMZM2G071249 // GRMZM2G347280 // GRMZM2G322661 // GRMZM2G093101 // GRMZM2G416817 // GRMZM2G064594 // GRMZM2G092888 // GRMZM2G174975 // GRMZM5G836174 // GRMZM2G091595 // GRMZM2G377589 // GRMZM2G416491 // GRMZM2G029400 // GRMZM5G887303 // GRMZM2G158205 // GRMZM2G166234
GO:0032561	F	guanyl ribonucleotide binding	5	504	768	39203	0.97	1	// GRMZM2G047476 // GRMZM2G373738 // GRMZM2G102946 // GRMZM2G039900 // AC203173.3_FG004
GO:0009055	F	electron carrier activity	15	504	914	39203	0.21	1	// GRMZM2G032763 // GRMZM2G701204 // GRMZM2G141473 // GRMZM5G872368 // GRMZM2G071450 // GRMZM2G023952 // GRMZM2G010348 // GRMZM2G082940 // GRMZM2G056247 // GRMZM2G010468 // GRMZM2G017419 // GRMZM2G467356 // GRMZM2G139467 // GRMZM2G180082 // GRMZM2G033198
GO:0022892	F	substrate-specific transporter activity	21	504	1632	39203	0.53	1	// GRMZM2G010779 // GRMZM2G420436 // GRMZM2G701207 // GRMZM2G092793 // GRMZM2G047476 // GRMZM2G134738 // GRMZM2G317270 // GRMZM2G064753 // GRMZM2G125495 // GRMZM2G421565 // GRMZM2G111300 // GRMZM2G148807 // GRMZM2G067853 // GRMZM2G321725 // GRMZM2G100650 // GRMZM2G084779 // GRMZM2G123884 // GRMZM2G477741 // GRMZM2G131431 // GRMZM2G006894 // GRMZM2G310569
GO:0016772	F	transferase activity, transferring phosphorus-containing groups	47	504	3661	39203	0.53	1	// GRMZM2G100114 // GRMZM2G036567 // GRMZM2G026580 // GRMZM2G104081 // GRMZM5G872368 // GRMZM2G007477 // GRMZM2G052935 // GRMZM2G308365 // GRMZM2G425249 // AC203966.5_FG003 // GRMZM2G056903 // GRMZM2G145753 // GRMZM2G012966 // GRMZM2G021074 // GRMZM2G104283 // GRMZM2G089819 // GRMZM2G398559 // GRMZM2G117028 // GRMZM5G823318 // GRMZM2G346132 // GRMZM2G022514 // GRMZM2G032619 // GRMZM2G089484 // GR…
GO:0016301	F	kinase activity	41	504	3006	39203	0.37	1	// GRMZM2G100114 // GRMZM2G104081 // GRMZM2G007477 // GRMZM2G052935 // GRMZM2G308365 // GRMZM2G425249 // AC203966.5_FG003 // GRMZM2G056903 // GRMZM2G145753 // GRMZM2G012966 // GRMZM2G104283 // GRMZM2G089819 // GRMZM2G398559 // GRMZM5G823318 // GRMZM2G346132 // GRMZM2G032619 // GRMZM2G089484 // GRMZM2G180023 // GRMZM2G022514 // GRMZM2G093789 // GRMZM2G140082 // GRMZM2G076943 // GRMZM2G151955 // GR…
GO:0015075	F	ion transmembrane transporter activity	20	504	1258	39203	0.2	1	// GRMZM2G010779 // GRMZM2G701207 // GRMZM2G092793 // GRMZM2G047476 // GRMZM2G134738 // GRMZM2G317270 // GRMZM2G064753 // GRMZM2G125495 // GRMZM2G421565 // GRMZM2G111300 // GRMZM2G148807 // GRMZM2G067853 // GRMZM2G321725 // GRMZM2G420436 // GRMZM2G084779 // GRMZM2G123884 // GRMZM2G477741 // GRMZM2G131431 // GRMZM2G006894 // GRMZM2G310569
GO:0015077	F	monovalent inorganic cation transmembrane transporter activity	8	504	329	39203	0.067	1	// GRMZM2G701207 // GRMZM2G134738 // GRMZM2G064753 // GRMZM2G084779 // GRMZM2G321725 // GRMZM2G131431 // GRMZM2G006894 // GRMZM2G047476
GO:0032555	F	purine ribonucleotide binding	64	504	5800	39203	0.92	1	// GRMZM2G100114 // AC203173.3_FG004 // GRMZM2G026580 // GRMZM2G104081 // GRMZM2G373738 // GRMZM2G007477 // GRMZM2G308365 // GRMZM2G111462 // GRMZM2G052581 // GRMZM5G887303 // GRMZM2G376708 // GRMZM2G102946 // GRMZM2G431524 // GRMZM2G056903 // GRMZM2G145753 // GRMZM2G012966 // GRMZM2G104283 // GRMZM2G089819 // GRMZM2G398559 // GRMZM2G162200 // GRMZM2G117028 // GRMZM2G022514 // GRMZM2G346132 // GR…
GO:0032553	F	ribonucleotide binding	64	504	5800	39203	0.92	1	// GRMZM2G100114 // AC203173.3_FG004 // GRMZM2G026580 // GRMZM2G104081 // GRMZM2G373738 // GRMZM2G007477 // GRMZM2G308365 // GRMZM2G111462 // GRMZM2G052581 // GRMZM5G887303 // GRMZM2G376708 // GRMZM2G102946 // GRMZM2G431524 // GRMZM2G056903 // GRMZM2G145753 // GRMZM2G012966 // GRMZM2G104283 // GRMZM2G089819 // GRMZM2G398559 // GRMZM2G162200 // GRMZM2G117028 // GRMZM2G022514 // GRMZM2G346132 // GR…
GO:0016791	F	phosphatase activity	6	504	347	39203	0.29	1	// GRMZM2G416491 // GRMZM2G093101 // GRMZM2G347280 // GRMZM2G153602 // GRMZM2G092888 // GRMZM5G836174
GO:0004175	F	endopeptidase activity	8	504	932	39203	0.91	1	// GRMZM2G147629 // GRMZM2G015441 // GRMZM5G891371 // GRMZM2G450659 // GRMZM2G062559 // AC196090.3_FG006 // GRMZM2G141036 // GRMZM2G028721
GO:0005525	F	GTP binding	5	504	768	39203	0.97	1	// GRMZM2G047476 // GRMZM2G373738 // GRMZM2G102946 // GRMZM2G039900 // AC203173.3_FG004
GO:0008233	F	peptidase activity	16	504	1529	39203	0.83	1	// GRMZM2G433767 // GRMZM2G439389 // GRMZM2G039930 // GRMZM2G028721 // GRMZM2G073908 // GRMZM2G147629 // GRMZM2G015441 // GRMZM2G159016 // GRMZM2G025154 // GRMZM5G891371 // GRMZM2G450659 // GRMZM2G088653 // GRMZM2G062559 // AC196090.3_FG006 // GRMZM2G141036 // GRMZM2G038636
GO:0043167	F	ion binding	91	504	6665	39203	0.28	1	// GRMZM2G150893 // GRMZM2G165063 // GRMZM2G151616 // GRMZM2G010348 // GRMZM2G036099 // GRMZM5G870219 // GRMZM2G028766 // GRMZM5G887216 // GRMZM2G139512 // GRMZM2G060163 // GRMZM5G891739 // GRMZM2G023952 // GRMZM2G126956 // GRMZM2G036708 // GRMZM2G321725 // GRMZM2G025854 // GRMZM2G099238 // GRMZM5G883417 // GRMZM2G172369 // GRMZM2G313009 // AC200210.1_FG006 // GRMZM2G130379 // GRMZM2G417125 // GR…
GO:0016820	F	hydrolase activity, acting on acid anhydrides, catalyzing transmembrane movement of substances	9	504	322	39203	0.027	1	// GRMZM2G067853 // GRMZM2G365957 // GRMZM2G701207 // GRMZM2G079777 // GRMZM2G317270 // GRMZM2G021635 // GRMZM2G321725 // GRMZM2G111462 // GRMZM2G006894
GO:0030528	F	transcription regulator activity	31	504	2233	39203	0.36	1	// GRMZM2G160687 // GRMZM2G112483 // GRMZM2G036567 // GRMZM2G037630 // GRMZM2G359952 // GRMZM2G134260 // GRMZM2G072926 // GRMZM2G015433 // GRMZM2G370777 // GRMZM5G805026 // GRMZM2G031882 // GRMZM2G105834 // GRMZM5G857944 // GRMZM2G341405 // GRMZM2G105387 // GRMZM2G151763 // GRMZM2G122076 // GRMZM2G135018 // GRMZM5G816314 // GRMZM2G320941 // GRMZM2G402862 // GRMZM2G351232 // GRMZM2G158328 // GRMZM…
GO:0016874	F	ligase activity	8	504	762	39203	0.76	1	// GRMZM2G315072 // GRMZM2G065612 // GRMZM5G887303 // GRMZM2G093175 // GRMZM2G139157 // GRMZM2G341405 // GRMZM2G101875 // GRMZM2G425965
GO:0016829	F	lyase activity	7	504	655	39203	0.74	1	// GRMZM2G124820 // GRMZM2G081582 // GRMZM2G085381 // GRMZM2G036708 // AC205502.4_FG004 // GRMZM2G109472 // GRMZM2G046284
GO:0008270	F	zinc ion binding	38	504	3989	39203	0.98	1	// GRMZM2G131611 // GRMZM2G069856 // GRMZM2G104081 // GRMZM2G165063 // GRMZM2G151616 // GRMZM2G116574 // GRMZM2G028766 // GRMZM2G007453 // GRMZM5G854499 // GRMZM2G139512 // GRMZM2G140299 // GRMZM2G142898 // GRMZM2G064753 // GRMZM2G034288 // GRMZM2G336761 // GRMZM2G126956 // GRMZM2G321725 // GRMZM2G109472 // GRMZM2G099238 // GRMZM2G172369 // GRMZM2G122706 // GRMZM2G162749 // GRMZM2G315072 // GRMZM…
GO:0016740	F	transferase activity	80	504	5727	39203	0.23	1	// GRMZM2G152895 // GRMZM2G106245 // GRMZM2G100114 // GRMZM2G095209 // GRMZM2G036567 // GRMZM5G860137 // GRMZM2G102550 // GRMZM2G104081 // GRMZM5G872368 // GRMZM2G015923 // GRMZM2G177150 // GRMZM2G007477 // GRMZM2G052935 // GRMZM2G308365 // GRMZM2G012966 // GRMZM2G425249 // GRMZM2G416322 // AC203966.5_FG003 // GRMZM2G056903 // GRMZM2G145753 // GRMZM2G137151 // GRMZM2G100864 // GRMZM2G021074 // GR…
GO:0016879	F	ligase activity, forming carbon-nitrogen bonds	6	504	514	39203	0.65	1	// GRMZM2G315072 // GRMZM2G065612 // GRMZM2G093175 // GRMZM2G139157 // GRMZM2G341405 // GRMZM2G425965
GO:0016741	F	transferase activity, transferring one-carbon groups	7	504	495	39203	0.45	1	// GRMZM2G060070 // GRMZM2G010056 // GRMZM2G405947 // GRMZM2G034288 // GRMZM2G008287 // GRMZM2G442804 // GRMZM2G100315
GO:0005509	F	calcium ion binding	9	504	534	39203	0.26	1	// GRMZM2G033846 // GRMZM2G095209 // GRMZM2G044963 // GRMZM2G305115 // GRMZM2G005557 // GRMZM2G125838 // GRMZM2G036099 // GRMZM5G870219 // GRMZM2G117796
GO:0016667	F	oxidoreductase activity, acting on sulfur group of donors	5	504	132	39203	0.031	1	// AC189750.4_FG004 // GRMZM2G017419 // GRMZM2G701204 // GRMZM2G032763 // GRMZM2G033198
GO:0005506	F	iron ion binding	17	504	1187	39203	0.36	1	// GRMZM5G850019 // GRMZM2G141473 // GRMZM5G872368 // GRMZM2G320269 // GRMZM2G023952 // GRMZM2G010348 // GRMZM2G152135 // GRMZM2G150134 // GRMZM2G130379 // GRMZM2G124276 // GRMZM2G079381 // GRMZM2G029912 // GRMZM2G150893 // GRMZM2G010468 // GRMZM2G056247 // GRMZM2G139467 // GRMZM2G180082
GO:0016747	F	transferase activity, transferring acyl groups other than amino-acyl groups	8	504	357	39203	0.096	1	// GRMZM2G106245 // GRMZM2G701207 // GRMZM2G152895 // GRMZM5G860137 // GRMZM2G177150 // GRMZM2G159641 // GRMZM2G314898 // GRMZM2G050641
GO:0015291	F	secondary active transmembrane transporter activity	7	504	421	39203	0.3	1	// GRMZM2G010779 // GRMZM2G084779 // GRMZM2G421565 // GRMZM2G166459 // GRMZM2G092793 // GRMZM2G115105 // GRMZM2G123884
GO:0016758	F	transferase activity, transferring hexosyl groups	8	504	542	39203	0.4	1	// GRMZM2G142898 // AC234524.1_FG005 // GRMZM2G417945 // GRMZM2G403740 // GRMZM2G168474 // EF517601.1_FG014 // GRMZM2G042607 // GRMZM2G165919
GO:0046906	F	tetrapyrrole binding	11	504	880	39203	0.58	1	// GRMZM2G150893 // GRMZM5G872368 // GRMZM2G320269 // GRMZM2G023952 // GRMZM2G010348 // GRMZM2G150134 // GRMZM2G079381 // GRMZM2G010468 // GRMZM2G056247 // GRMZM2G139467 // GRMZM2G180082
GO:0016853	F	isomerase activity	12	504	567	39203	0.068	1	// GRMZM2G081682 // GRMZM2G439389 // GRMZM2G015011 // GRMZM2G031169 // GRMZM2G145029 // GRMZM2G435244 // GRMZM2G095333 // GRMZM2G025854 // GRMZM2G047592 // GRMZM2G052581 // GRMZM2G171662 // GRMZM2G357667
GO:0000166	F	nucleotide binding	85	504	6408	39203	0.4	1	// GRMZM2G129246 // GRMZM2G100114 // GRMZM2G388576 // GRMZM2G007195 // AC203173.3_FG004 // GRMZM2G026580 // GRMZM2G104081 // GRMZM2G373738 // GRMZM2G104283 // GRMZM2G007477 // GRMZM2G039106 // GRMZM2G308365 // GRMZM2G090241 // GRMZM2G101693 // GRMZM2G111462 // GRMZM2G178822 // GRMZM2G052581 // GRMZM2G105933 // GRMZM2G416322 // GRMZM2G412075 // GRMZM2G102946 // GRMZM2G431524 // GRMZM2G067853 // GR…
GO:0043565	F	sequence-specific DNA binding	14	504	985	39203	0.39	1	// GRMZM5G863420 // GRMZM2G112483 // GRMZM2G122076 // GRMZM2G158328 // GRMZM5G805026 // GRMZM2G031882 // GRMZM2G105834 // GRMZM2G134260 // GRMZM2G063880 // GRMZM2G402862 // GRMZM2G428184 // GRMZM2G149150 // GRMZM2G015433 // GRMZM2G151763
GO:0016773	F	phosphotransferase activity, alcohol group as acceptor	38	504	2858	39203	0.44	1	// GRMZM2G100114 // GRMZM2G104081 // GRMZM2G007477 // GRMZM2G308365 // GRMZM2G425249 // GRMZM2G431524 // GRMZM2G056903 // GRMZM2G145753 // GRMZM2G012966 // GRMZM2G104283 // GRMZM2G089819 // GRMZM2G398559 // GRMZM2G022514 // GRMZM2G346132 // GRMZM2G032619 // GRMZM2G089484 // GRMZM2G180023 // GRMZM2G093789 // GRMZM2G140082 // GRMZM2G076943 // GRMZM2G151955 // GRMZM5G854625 // GRMZM2G062045 // GRMZM…
GO:0003723	F	RNA binding	6	504	1088	39203	0.99	1	// GRMZM2G060070 // GRMZM2G010056 // GRMZM2G176397 // GRMZM2G472052 // GRMZM2G007453 // GRMZM2G412075
GO:0051536	F	iron-sulfur cluster binding	5	504	207	39203	0.13	1	// GRMZM2G141473 // GRMZM2G467356 // GRMZM2G079381 // GRMZM2G176397 // GRMZM2G097190
GO:0005488	F	binding	291	504	24279	39203	0.98	1	// GRMZM2G091916 // GRMZM2G052935 // GRMZM2G143253 // GRMZM5G803355 // GRMZM2G433727 // GRMZM2G150893 // GRMZM2G373738 // AC196961.2_FG003 // GRMZM2G165063 // GRMZM2G151616 // GRMZM2G037630 // GRMZM2G150134 // GRMZM2G001530 // GRMZM2G130379 // GRMZM2G036099 // GRMZM2G105834 // GRMZM2G028766 // GRMZM2G079381 // GRMZM2G007021 // GRMZM2G015433 // GRMZM2G076943 // GRMZM2G176270 // GRMZM2G090241 // GR…
GO:0050660	F	FAD binding	5	504	265	39203	0.26	1	// GRMZM2G348846 // GRMZM2G141473 // GRMZM2G381051 // GRMZM5G828229 // GRMZM2G112792
GO:0016887	F	ATPase activity	10	504	785	39203	0.56	1	// GRMZM2G067853 // GRMZM2G365957 // GRMZM2G355523 // GRMZM2G079777 // GRMZM2G317270 // GRMZM2G021635 // GRMZM2G321725 // GRMZM2G111462 // GRMZM2G701207 // GRMZM2G006894
GO:0004553	F	hydrolase activity, hydrolyzing O-glycosyl compounds	14	504	767	39203	0.13	1	// GRMZM2G477236 // GRMZM2G138060 // GRMZM2G108133 // GRMZM2G030850 // GRMZM2G473711 // GRMZM2G180889 // GRMZM2G111324 // GRMZM2G060023 // GRMZM2G084940 // GRMZM2G041961 // GRMZM2G019185 // GRMZM2G172369 // GRMZM2G081729 // GRMZM2G029243
GO:0030246	F	carbohydrate binding	7	504	271	39203	0.066	1	// GRMZM2G095209 // GRMZM2G161534 // GRMZM2G022514 // GRMZM2G047592 // GRMZM2G042607 // GRMZM2G172369 // GRMZM2G029243
GO:0004871	F	signal transducer activity	5	504	1377	39203	1	1	// GRMZM2G341405 // GRMZM2G320941 // GRMZM2G125495 // GRMZM2G089484 // GRMZM2G148807
GO:0017111	F	nucleoside-triphosphatase activity	15	504	1822	39203	0.98	1	// GRMZM2G067853 // GRMZM2G365957 // GRMZM2G355523 // GRMZM2G079777 // AC203173.3_FG004 // GRMZM2G317270 // GRMZM2G021635 // GRMZM2G136219 // GRMZM2G015395 // GRMZM2G321725 // GRMZM2G026580 // GRMZM2G111462 // GRMZM2G701207 // GRMZM2G363408 // GRMZM2G006894
GO:0001882	F	nucleoside binding	62	504	5400	39203	0.85	1	// GRMZM2G100114 // GRMZM2G026580 // GRMZM2G104081 // GRMZM2G007477 // GRMZM2G308365 // GRMZM2G111462 // GRMZM2G052581 // GRMZM2G105933 // GRMZM5G887303 // GRMZM2G376708 // GRMZM2G431524 // GRMZM2G056903 // GRMZM2G145753 // GRMZM2G012966 // GRMZM2G104283 // GRMZM2G136219 // GRMZM2G398559 // GRMZM2G162200 // GRMZM2G089819 // GRMZM2G117028 // GRMZM2G022514 // GRMZM2G346132 // GRMZM2G097190 // GRMZM…
GO:0050662	F	coenzyme binding	12	504	734	39203	0.24	1	// GRMZM2G082792 // GRMZM2G090241 // GRMZM2G074114 // GRMZM2G348846 // GRMZM2G141473 // GRMZM2G129246 // GRMZM5G828229 // GRMZM2G112792 // GRMZM2G101693 // GRMZM2G007195 // GRMZM2G381051 // GRMZM2G006672
GO:0051540	F	metal cluster binding	5	504	207	39203	0.13	1	// GRMZM2G141473 // GRMZM2G467356 // GRMZM2G079381 // GRMZM2G176397 // GRMZM2G097190
GO:0016462	F	pyrophosphatase activity	18	504	1907	39203	0.93	1	// GRMZM2G001905 // GRMZM2G365957 // GRMZM2G067853 // GRMZM2G079777 // AC203173.3_FG004 // GRMZM2G026580 // GRMZM2G317270 // GRMZM2G021635 // GRMZM2G136219 // GRMZM2G015395 // GRMZM2G321725 // GRMZM2G101693 // GRMZM2G111462 // GRMZM2G355523 // GRMZM2G341405 // GRMZM2G701207 // GRMZM2G363408 // GRMZM2G006894
GO:0005198	F	structural molecule activity	13	504	2019	39203	1	1	// GRMZM2G030731 // GRMZM2G065868 // GRMZM2G129015 // GRMZM2G327564 // GRMZM2G089421 // GRMZM2G166963 // GRMZM2G006219 // GRMZM2G171406 // GRMZM2G077208 // GRMZM2G047476 // GRMZM2G028883 // GRMZM2G305154 // GRMZM2G104025
GO:0004674	F	protein serine/threonine kinase activity	20	504	2248	39203	0.97	1	// GRMZM2G431524 // GRMZM5G809695 // GRMZM2G065214 // GRMZM2G076943 // GRMZM2G151955 // GRMZM2G142207 // GRMZM2G104283 // GRMZM2G007477 // GRMZM2G012966 // GRMZM2G308365 // GRMZM2G022514 // GRMZM2G117796 // GRMZM2G139157 // GRMZM2G039106 // GRMZM2G032619 // GRMZM2G095209 // GRMZM2G089484 // GRMZM2G041544 // GRMZM2G067727 // GRMZM2G178822
GO:0070011	F	peptidase activity, acting on L-amino acid peptides	16	504	1493	39203	0.8	1	// GRMZM2G433767 // GRMZM2G439389 // GRMZM2G039930 // GRMZM2G028721 // GRMZM2G073908 // GRMZM2G147629 // GRMZM2G015441 // GRMZM2G159016 // GRMZM2G025154 // GRMZM5G891371 // GRMZM2G450659 // GRMZM2G088653 // GRMZM2G062559 // AC196090.3_FG006 // GRMZM2G141036 // GRMZM2G038636
GO:0001883	F	purine nucleoside binding	62	504	5398	39203	0.85	1	// GRMZM2G100114 // GRMZM2G026580 // GRMZM2G104081 // GRMZM2G007477 // GRMZM2G308365 // GRMZM2G111462 // GRMZM2G052581 // GRMZM2G105933 // GRMZM5G887303 // GRMZM2G376708 // GRMZM2G431524 // GRMZM2G056903 // GRMZM2G145753 // GRMZM2G012966 // GRMZM2G104283 // GRMZM2G136219 // GRMZM2G398559 // GRMZM2G162200 // GRMZM2G089819 // GRMZM2G117028 // GRMZM2G022514 // GRMZM2G346132 // GRMZM2G097190 // GRMZM…
GO:0005215	F	transporter activity	30	504	2411	39203	0.6	1	// GRMZM2G310569 // GRMZM2G421565 // GRMZM2G111462 // GRMZM2G131431 // GRMZM2G420436 // GRMZM2G021635 // GRMZM2G092793 // GRMZM2G079777 // GRMZM2G122251 // GRMZM2G064753 // GRMZM2G321725 // GRMZM2G100650 // GRMZM2G115105 // GRMZM2G341405 // GRMZM2G006894 // GRMZM2G477741 // GRMZM2G084779 // GRMZM2G515874 // GRMZM2G047476 // GRMZM2G010779 // GRMZM2G365957 // GRMZM2G701207 // GRMZM2G134738 // GRMZM…
GO:0032559	F	adenyl ribonucleotide binding	59	504	5137	39203	0.84	1	// GRMZM2G100114 // GRMZM2G026580 // GRMZM2G104081 // GRMZM2G007477 // GRMZM2G308365 // GRMZM2G111462 // GRMZM2G052581 // GRMZM5G887303 // GRMZM2G376708 // GRMZM2G431524 // GRMZM2G056903 // GRMZM2G145753 // GRMZM2G012966 // GRMZM2G104283 // GRMZM2G089819 // GRMZM2G398559 // GRMZM2G162200 // GRMZM2G117028 // GRMZM2G022514 // GRMZM2G346132 // GRMZM2G097190 // GRMZM2G032619 // GRMZM2G381051 // GRMZM…
GO:0016757	F	transferase activity, transferring glycosyl groups	11	504	747	39203	0.37	1	// GRMZM2G142898 // AC234524.1_FG005 // GRMZM2G417945 // GRMZM2G015923 // GRMZM2G459363 // GRMZM2G403740 // GRMZM2G168474 // GRMZM2G109472 // EF517601.1_FG014 // GRMZM2G042607 // GRMZM2G165919
GO:0008324	F	cation transmembrane transporter activity	18	504	996	39203	0.098	1	// GRMZM2G010779 // GRMZM2G701207 // GRMZM2G310569 // GRMZM2G047476 // GRMZM2G134738 // GRMZM2G317270 // GRMZM2G064753 // GRMZM2G421565 // GRMZM2G111300 // GRMZM2G125495 // GRMZM2G067853 // GRMZM2G321725 // GRMZM2G420436 // GRMZM2G084779 // GRMZM2G123884 // GRMZM2G131431 // GRMZM2G006894 // GRMZM2G477741
GO:0042625	F	ATPase activity, coupled to transmembrane movement of ions	5	504	217	39203	0.15	1	// GRMZM2G067853 // GRMZM2G317270 // GRMZM2G321725 // GRMZM2G701207 // GRMZM2G006894
GO:0022891	F	substrate-specific transmembrane transporter activity	20	504	1472	39203	0.43	1	// GRMZM2G010779 // GRMZM2G701207 // GRMZM2G092793 // GRMZM2G047476 // GRMZM2G134738 // GRMZM2G317270 // GRMZM2G064753 // GRMZM2G125495 // GRMZM2G421565 // GRMZM2G111300 // GRMZM2G148807 // GRMZM2G067853 // GRMZM2G321725 // GRMZM2G420436 // GRMZM2G084779 // GRMZM2G123884 // GRMZM2G477741 // GRMZM2G131431 // GRMZM2G006894 // GRMZM2G310569
GO:0003824	F	catalytic activity	248	504	17617	39203	0.031	1	// GRMZM2G106245 // GRMZM2G150893 // GRMZM2G336879 // GRMZM2G110369 // GRMZM2G579719 // GRMZM2G425249 // GRMZM2G111462 // GRMZM2G105933 // GRMZM2G090241 // GRMZM2G056903 // GRMZM2G039930 // GRMZM2G139512 // GRMZM2G137151 // GRMZM2G031447 // GRMZM2G060163 // GRMZM5G891739 // GRMZM2G145029 // GRMZM2G117028 // GRMZM2G038636 // GRMZM2G036708 // GRMZM2G041961 // GRMZM2G321725 // GRMZM2G071249 // GRMZM…
GO:0017171	F	serine hydrolase activity	8	504	511	39203	0.34	1	// GRMZM2G039930 // GRMZM2G433767 // GRMZM2G147629 // GRMZM2G159016 // GRMZM2G025154 // GRMZM5G891371 // AC196090.3_FG006 // GRMZM2G073908
GO:0015078	F	hydrogen ion transmembrane transporter activity	7	504	271	39203	0.066	1	// GRMZM2G701207 // GRMZM2G134738 // GRMZM2G064753 // GRMZM2G321725 // GRMZM2G131431 // GRMZM2G006894 // GRMZM2G047476
GO:0048037	F	cofactor binding	15	504	1034	39203	0.36	1	// GRMZM2G082792 // GRMZM2G090241 // GRMZM2G074114 // GRMZM2G165613 // GRMZM2G348846 // GRMZM2G141473 // GRMZM2G124963 // GRMZM2G129246 // GRMZM5G828229 // GRMZM2G404025 // GRMZM2G112792 // GRMZM2G101693 // GRMZM2G007195 // GRMZM2G381051 // GRMZM2G006672
GO:0046873	F	metal ion transmembrane transporter activity	8	504	328	39203	0.066	1	// GRMZM2G310569 // GRMZM2G317270 // GRMZM2G084779 // GRMZM2G111300 // GRMZM2G067853 // GRMZM2G125495 // GRMZM2G420436 // GRMZM2G477741
GO:0005886	C	plasma membrane	66	504	149	39203	3.7e-72	1.1e-69	// GRMZM2G030731 // GRMZM2G087094 // AC203173.3_FG004 // GRMZM2G092888 // GRMZM2G104081 // GRMZM2G028883 // GRMZM2G146809 // GRMZM2G001530 // GRMZM2G126732 // GRMZM2G013324 // GRMZM2G119426 // GRMZM2G010348 // GRMZM5G887303 // GRMZM5G846196 // GRMZM2G016290 // GRMZM2G139512 // GRMZM2G172369 // GRMZM2G100864 // GRMZM2G320269 // GRMZM2G089819 // GRMZM2G044963 // GRMZM2G003752 // GRMZM2G006219 // GR…
GO:0044444	C	cytoplasmic part	145	504	2678	39203	1.1e-49	1.7e-47	// GRMZM2G115621 // GRMZM2G313529 // GRMZM2G150893 // GRMZM2G421565 // GRMZM2G001530 // GRMZM2G036099 // GRMZM2G007021 // GRMZM2G039930 // GRMZM2G139512 // GRMZM2G137151 // GRMZM2G060163 // GRMZM5G891739 // GRMZM2G145029 // GRMZM2G006219 // GRMZM2G036708 // GRMZM2G041961 // GRMZM2G321725 // GRMZM2G025854 // GRMZM2G115105 // GRMZM2G442804 // GRMZM2G381051 // GRMZM2G089484 // GRMZM2G063188 // GRMZM…
GO:0005773	C	vacuole	35	504	38	39203	6.8e-47	7e-45	// GRMZM5G891739 // GRMZM2G036448 // GRMZM2G115621 // GRMZM2G313529 // GRMZM2G104081 // GRMZM2G131431 // GRMZM2G118800 // GRMZM5G846196 // GRMZM2G139512 // GRMZM2G079777 // GRMZM2G409726 // GRMZM2G006219 // GRMZM2G041961 // GRMZM2G126865 // GRMZM2G150893 // GRMZM2G172369 // GRMZM2G089484 // GRMZM2G006894 // GRMZM2G477741 // GRMZM2G081682 // GRMZM2G044963 // GRMZM2G125838 // AC196961.2_FG003 // GR…
GO:0043231	C	intracellular membrane-bounded organelle	168	504	4093	39203	7.1e-43	5.5e-41	// GRMZM5G803355 // GRMZM2G115621 // GRMZM2G313529 // GRMZM2G150893 // GRMZM2G421565 // GRMZM2G037630 // GRMZM2G001530 // GRMZM2G030731 // GRMZM2G036099 // GRMZM2G105834 // GRMZM2G007021 // GRMZM2G310569 // GRMZM2G039930 // GRMZM2G139512 // GRMZM2G137151 // GRMZM2G433727 // GRMZM2G145029 // GRMZM2G006219 // GRMZM2G126956 // GRMZM2G036708 // GRMZM2G041961 // GRMZM2G321725 // GRMZM2G025854 // GRMZM…
GO:0043227	C	membrane-bounded organelle	168	504	4127	39203	2e-42	1.2e-40	// GRMZM5G803355 // GRMZM2G115621 // GRMZM2G313529 // GRMZM2G150893 // GRMZM2G421565 // GRMZM2G037630 // GRMZM2G001530 // GRMZM2G030731 // GRMZM2G036099 // GRMZM2G105834 // GRMZM2G007021 // GRMZM2G310569 // GRMZM2G039930 // GRMZM2G139512 // GRMZM2G137151 // GRMZM2G433727 // GRMZM2G145029 // GRMZM2G006219 // GRMZM2G126956 // GRMZM2G036708 // GRMZM2G041961 // GRMZM2G321725 // GRMZM2G025854 // GRMZM…
GO:0005737	C	cytoplasm	152	504	3593	39203	9.8e-40	5.1e-38	// GRMZM2G089421 // GRMZM2G115621 // GRMZM2G313529 // GRMZM2G150893 // GRMZM2G421565 // GRMZM2G001530 // GRMZM2G036099 // GRMZM2G007021 // GRMZM2G039930 // GRMZM2G139512 // GRMZM2G137151 // GRMZM2G060163 // GRMZM5G891739 // GRMZM2G145029 // GRMZM2G006219 // GRMZM2G036708 // GRMZM2G041961 // GRMZM2G321725 // GRMZM2G025854 // GRMZM2G115105 // GRMZM2G442804 // GRMZM2G032619 // GRMZM2G381051 // GRMZM…
GO:0043229	C	intracellular organelle	180	504	6224	39203	4.2e-27	1.6e-25	// GRMZM5G803355 // GRMZM2G115621 // GRMZM2G313529 // GRMZM2G150893 // GRMZM2G421565 // GRMZM2G037630 // GRMZM2G001530 // GRMZM2G030731 // GRMZM2G036099 // GRMZM2G105834 // GRMZM2G007021 // GRMZM2G310569 // GRMZM2G039930 // GRMZM2G139512 // GRMZM2G137151 // GRMZM2G433727 // GRMZM2G145029 // GRMZM2G006219 // GRMZM2G126956 // GRMZM2G036708 // GRMZM2G041961 // GRMZM2G321725 // GRMZM2G025854 // GRMZM…
GO:0043226	C	organelle	180	504	6224	39203	4.2e-27	1.6e-25	// GRMZM5G803355 // GRMZM2G115621 // GRMZM2G313529 // GRMZM2G150893 // GRMZM2G421565 // GRMZM2G037630 // GRMZM2G001530 // GRMZM2G030731 // GRMZM2G036099 // GRMZM2G105834 // GRMZM2G007021 // GRMZM2G310569 // GRMZM2G039930 // GRMZM2G139512 // GRMZM2G137151 // GRMZM2G433727 // GRMZM2G145029 // GRMZM2G006219 // GRMZM2G126956 // GRMZM2G036708 // GRMZM2G041961 // GRMZM2G321725 // GRMZM2G025854 // GRMZM…
GO:0044422	C	organelle part	87	504	1764	39203	3.1e-26	9.6e-25	// GRMZM2G115621 // GRMZM2G313529 // AC196961.2_FG003 // GRMZM2G421565 // GRMZM2G037630 // GRMZM2G036099 // GRMZM5G870219 // GRMZM2G007021 // GRMZM2G090241 // GRMZM2G039930 // GRMZM2G139512 // GRMZM2G006219 // GRMZM2G321725 // GRMZM2G025854 // GRMZM2G172369 // GRMZM2G381051 // GRMZM2G063188 // GRMZM2G038313 // GRMZM2G071959 // GRMZM2G116542 // GRMZM2G084195 // GRMZM2G010779 // GRMZM2G031169 // GR…
GO:0044446	C	intracellular organelle part	87	504	1764	39203	3.1e-26	9.6e-25	// GRMZM2G115621 // GRMZM2G313529 // AC196961.2_FG003 // GRMZM2G421565 // GRMZM2G037630 // GRMZM2G036099 // GRMZM5G870219 // GRMZM2G007021 // GRMZM2G090241 // GRMZM2G039930 // GRMZM2G139512 // GRMZM2G006219 // GRMZM2G321725 // GRMZM2G025854 // GRMZM2G172369 // GRMZM2G381051 // GRMZM2G063188 // GRMZM2G038313 // GRMZM2G071959 // GRMZM2G116542 // GRMZM2G084195 // GRMZM2G010779 // GRMZM2G031169 // GR…
GO:0044424	C	intracellular part	199	504	7930	39203	7.7e-23	2.2e-21	// GRMZM2G089421 // GRMZM5G803355 // GRMZM2G115621 // GRMZM2G313529 // GRMZM2G150893 // GRMZM2G421565 // GRMZM2G037630 // GRMZM2G001530 // GRMZM2G030731 // GRMZM2G036099 // GRMZM2G105834 // GRMZM2G007021 // GRMZM2G310569 // GRMZM2G039930 // GRMZM2G139512 // GRMZM2G137151 // GRMZM2G060163 // GRMZM2G433727 // GRMZM2G145029 // GRMZM2G006219 // GRMZM2G126956 // GRMZM2G036708 // GRMZM2G041961 // GRMZM…
GO:0005911	C	cell-cell junction	16	504	24	39203	1.7e-20	4.4e-19	// GRMZM2G445169 // GRMZM2G030731 // GRMZM2G143445 // GRMZM2G087094 // GRMZM2G100864 // GRMZM2G093101 // GRMZM2G320269 // GRMZM2G089819 // GRMZM2G082792 // GRMZM2G030850 // GRMZM2G146809 // GRMZM2G013324 // GRMZM2G414540 // AC196961.2_FG003 // GRMZM5G887303 // GRMZM2G172642
GO:0005829	C	cytosol	26	504	160	39203	1.6e-19	3.8e-18	// GRMZM2G030731 // GRMZM2G065868 // AC203173.3_FG004 // GRMZM2G033846 // GRMZM2G007021 // GRMZM2G176707 // GRMZM2G129015 // GRMZM2G145029 // GRMZM2G006219 // GRMZM2G086030 // GRMZM2G097190 // GRMZM2G048616 // GRMZM2G445169 // GRMZM2G477236 // GRMZM2G093101 // GRMZM2G095185 // GRMZM2G166963 // GRMZM2G089421 // AC196961.2_FG003 // GRMZM2G010146 // GRMZM2G402002 // GRMZM2G000623 // GRMZM5G887303 //…
GO:0030054	C	cell junction	16	504	35	39203	1.7e-18	3.8e-17	// GRMZM2G445169 // GRMZM2G030731 // GRMZM2G143445 // GRMZM2G087094 // GRMZM2G100864 // GRMZM2G093101 // GRMZM2G320269 // GRMZM2G089819 // GRMZM2G082792 // GRMZM2G030850 // GRMZM2G146809 // GRMZM2G013324 // GRMZM2G414540 // AC196961.2_FG003 // GRMZM5G887303 // GRMZM2G172642
GO:0005622	C	intracellular	209	504	9403	39203	6.9e-18	1.4e-16	// GRMZM2G089421 // GRMZM5G803355 // GRMZM2G115621 // GRMZM2G313529 // GRMZM2G150893 // GRMZM2G421565 // GRMZM2G037630 // GRMZM2G001530 // GRMZM2G030731 // GRMZM2G036099 // GRMZM2G105834 // GRMZM2G028766 // GRMZM2G007021 // GRMZM2G310569 // GRMZM2G039930 // GRMZM2G139512 // GRMZM2G137151 // GRMZM2G060163 // GRMZM2G433727 // GRMZM2G145029 // GRMZM2G006219 // GRMZM2G126956 // GRMZM2G036708 // GRMZM…
GO:0016020	C	membrane	142	504	5307	39203	1.1e-17	2.1e-16	// GRMZM2G087094 // GRMZM2G115621 // GRMZM2G313529 // GRMZM2G150893 // GRMZM2G092704 // GRMZM2G421565 // GRMZM2G146809 // GRMZM2G001530 // GRMZM2G092888 // GRMZM5G870219 // GRMZM2G111462 // GRMZM2G007021 // GRMZM2G039930 // GRMZM2G139512 // GRMZM2G003752 // GRMZM2G006219 // GRMZM2G089819 // GRMZM2G041961 // GRMZM2G321725 // GRMZM2G115105 // GRMZM5G883417 // GRMZM2G341405 // GRMZM2G172369 // GRMZM…
GO:0044464	C	cell part	269	504	13914	39203	3.1e-16	5.4e-15	// GRMZM2G089421 // GRMZM2G087094 // GRMZM5G803355 // GRMZM2G115621 // GRMZM2G313529 // GRMZM2G150893 // GRMZM2G092704 // GRMZM2G421565 // GRMZM2G037630 // GRMZM2G146809 // GRMZM2G001530 // GRMZM2G092888 // GRMZM2G030731 // GRMZM2G036099 // GRMZM2G105834 // GRMZM2G028766 // GRMZM2G007021 // GRMZM2G310569 // GRMZM2G039930 // GRMZM2G139512 // GRMZM2G137151 // GRMZM2G060163 // GRMZM2G433727 // GRMZM…
GO:0005623	C	cell	269	504	13914	39203	3.1e-16	5.4e-15	// GRMZM2G089421 // GRMZM2G087094 // GRMZM5G803355 // GRMZM2G115621 // GRMZM2G313529 // GRMZM2G150893 // GRMZM2G092704 // GRMZM2G421565 // GRMZM2G037630 // GRMZM2G146809 // GRMZM2G001530 // GRMZM2G092888 // GRMZM2G030731 // GRMZM2G036099 // GRMZM2G105834 // GRMZM2G028766 // GRMZM2G007021 // GRMZM2G310569 // GRMZM2G039930 // GRMZM2G139512 // GRMZM2G137151 // GRMZM2G060163 // GRMZM2G433727 // GRMZM…
GO:0009579	C	thylakoid	20	504	122	39203	2.2e-15	3.6e-14	// GRMZM2G095333 // GRMZM2G039930 // GRMZM2G139512 // GRMZM2G134738 // GRMZM2G031169 // GRMZM2G010196 // GRMZM2G071450 // GRMZM2G404025 // GRMZM2G143917 // GRMZM2G162200 // GRMZM2G033198 // GRMZM5G870219 // GRMZM2G450659 // AC196961.2_FG003 // GRMZM2G084195 // GRMZM2G367092 // GRMZM2G047219 // GRMZM2G046284 // GRMZM2G064753 // GRMZM2G472852
GO:0044459	C	plasma membrane part	20	504	130	39203	6.4e-15	9.9e-14	// GRMZM2G445169 // GRMZM2G030731 // GRMZM2G143445 // GRMZM2G087094 // GRMZM2G100864 // GRMZM2G093101 // GRMZM2G320269 // GRMZM5G887303 // GRMZM2G089819 // GRMZM2G082792 // GRMZM2G003752 // GRMZM2G030850 // GRMZM2G111324 // GRMZM2G013324 // GRMZM2G414540 // AC196961.2_FG003 // GRMZM2G146809 // GRMZM2G172642 // AC213621.5_FG004 // GRMZM2G154301
GO:0070013	C	intracellular organelle lumen	22	504	189	39203	5.1e-14	7.2e-13	// GRMZM2G030731 // GRMZM2G065868 // AC203173.3_FG004 // GRMZM2G037630 // GRMZM2G095333 // GRMZM2G007021 // GRMZM2G033198 // GRMZM2G089421 // GRMZM2G071450 // GRMZM2G321725 // GRMZM2G046284 // GRMZM2G071959 // GRMZM2G166963 // GRMZM2G441565 // AC196961.2_FG003 // GRMZM2G084195 // GRMZM2G351232 // GRMZM2G381051 // GRMZM2G410710 // GRMZM2G046055 // GRMZM2G306258 // GRMZM2G028883
GO:0043233	C	organelle lumen	22	504	189	39203	5.1e-14	7.2e-13	// GRMZM2G030731 // GRMZM2G065868 // AC203173.3_FG004 // GRMZM2G037630 // GRMZM2G095333 // GRMZM2G007021 // GRMZM2G033198 // GRMZM2G089421 // GRMZM2G071450 // GRMZM2G321725 // GRMZM2G046284 // GRMZM2G071959 // GRMZM2G166963 // GRMZM2G441565 // AC196961.2_FG003 // GRMZM2G084195 // GRMZM2G351232 // GRMZM2G381051 // GRMZM2G410710 // GRMZM2G046055 // GRMZM2G306258 // GRMZM2G028883
GO:0031090	C	organelle membrane	32	504	456	39203	5.5e-14	7.3e-13	// GRMZM2G367092 // GRMZM2G137779 // GRMZM2G036448 // GRMZM2G115621 // GRMZM2G313529 // GRMZM2G421565 // GRMZM2G033198 // GRMZM5G846196 // GRMZM2G039930 // GRMZM2G139512 // GRMZM2G079777 // GRMZM2G064753 // GRMZM2G071450 // GRMZM2G006219 // GRMZM2G050825 // GRMZM2G321725 // GRMZM2G172369 // GRMZM2G472852 // GRMZM2G404025 // GRMZM2G450659 // AC196961.2_FG003 // GRMZM2G037015 // GRMZM2G010779 // GR…
GO:0031974	C	membrane-enclosed lumen	23	504	214	39203	6.4e-14	8.2e-13	// GRMZM2G030731 // GRMZM2G065868 // AC203173.3_FG004 // GRMZM2G037630 // GRMZM2G095333 // GRMZM2G007021 // GRMZM2G033198 // GRMZM2G089421 // GRMZM2G071450 // GRMZM2G010348 // GRMZM2G321725 // GRMZM2G046284 // GRMZM2G071959 // GRMZM2G166963 // GRMZM2G441565 // AC196961.2_FG003 // GRMZM2G084195 // GRMZM2G351232 // GRMZM2G381051 // GRMZM2G410710 // GRMZM2G046055 // GRMZM2G306258 // GRMZM2G028883
GO:0005618	C	cell wall	21	504	172	39203	8.3e-14	1e-12	// GRMZM2G162200 // GRMZM2G445169 // GRMZM2G087094 // GRMZM2G100864 // GRMZM2G093101 // GRMZM2G348846 // GRMZM2G003752 // GRMZM2G410710 // GRMZM2G030850 // GRMZM2G050925 // GRMZM2G013324 // GRMZM2G146809 // GRMZM2G025154 // GRMZM2G041961 // GRMZM2G321725 // GRMZM2G320269 // GRMZM2G150893 // GRMZM2G126732 // GRMZM2G172369 // GRMZM2G089819 // GRMZM2G102946
GO:0030312	C	external encapsulating structure	23	504	219	39203	1e-13	1.2e-12	// GRMZM2G087094 // GRMZM2G150893 // GRMZM2G146809 // GRMZM2G013324 // GRMZM2G100864 // GRMZM2G320269 // GRMZM2G089819 // GRMZM2G003752 // GRMZM2G041961 // GRMZM2G321725 // GRMZM2G172369 // GRMZM2G445169 // GRMZM2G102946 // GRMZM2G093101 // GRMZM2G348846 // GRMZM2G025154 // GRMZM2G126732 // GRMZM2G410710 // GRMZM2G030850 // GRMZM2G050925 // GRMZM2G148807 // GRMZM2G162200 // GRMZM2G125495
GO:0044436	C	thylakoid part	15	504	67	39203	1.3e-13	1.5e-12	// GRMZM2G095333 // GRMZM2G039930 // GRMZM2G139512 // GRMZM2G134738 // GRMZM2G031169 // GRMZM2G064753 // GRMZM2G071450 // GRMZM2G404025 // GRMZM2G162200 // GRMZM2G033198 // GRMZM5G870219 // GRMZM2G450659 // GRMZM2G367092 // GRMZM2G046284 // GRMZM2G472852
GO:0042651	C	thylakoid membrane	12	504	34	39203	4e-13	4.5e-12	// GRMZM2G039930 // GRMZM2G139512 // GRMZM2G134738 // GRMZM2G031169 // GRMZM2G064753 // GRMZM2G071450 // GRMZM2G404025 // GRMZM2G162200 // GRMZM2G450659 // GRMZM2G367092 // GRMZM2G033198 // GRMZM2G472852
GO:0031981	C	nuclear lumen	17	504	150	39203	5.7e-11	6.1e-10	// GRMZM2G351232 // GRMZM2G030731 // GRMZM2G065868 // AC203173.3_FG004 // GRMZM2G410710 // GRMZM2G089421 // GRMZM2G166963 // GRMZM2G037630 // GRMZM2G046055 // GRMZM2G071959 // GRMZM2G321725 // GRMZM2G306258 // GRMZM2G441565 // AC196961.2_FG003 // GRMZM2G084195 // GRMZM2G007021 // GRMZM2G028883
GO:0044428	C	nuclear part	20	504	233	39203	1.2e-10	1.2e-09	// GRMZM2G351232 // GRMZM2G030731 // GRMZM2G065868 // AC203173.3_FG004 // GRMZM2G410710 // GRMZM2G089421 // GRMZM2G166963 // GRMZM2G037630 // GRMZM2G046055 // GRMZM2G071959 // GRMZM2G321725 // GRMZM2G320606 // GRMZM2G306258 // GRMZM2G441565 // AC196961.2_FG003 // GRMZM2G084195 // GRMZM2G007021 // GRMZM2G028883 // GRMZM2G063188 // GRMZM2G038313
GO:0031975	C	envelope	23	504	359	39203	1.1e-09	1.1e-08	// GRMZM2G115621 // GRMZM2G007021 // GRMZM2G420436 // GRMZM2G039930 // GRMZM2G139512 // GRMZM2G016774 // GRMZM2G064753 // GRMZM2G010348 // GRMZM2G050825 // GRMZM2G321725 // GRMZM2G025854 // GRMZM2G046284 // GRMZM2G063188 // GRMZM2G076631 // GRMZM5G828229 // GRMZM2G047457 // GRMZM2G134738 // GRMZM2G031169 // GRMZM2G148807 // GRMZM2G067853 // GRMZM2G162200 // GRMZM2G125495 // GRMZM2G051403
GO:0031967	C	organelle envelope	21	504	310	39203	2.2e-09	2.2e-08	// GRMZM2G047457 // GRMZM2G039930 // GRMZM2G139512 // GRMZM2G134738 // GRMZM2G016774 // GRMZM2G115621 // GRMZM2G031169 // GRMZM2G064753 // GRMZM2G076631 // GRMZM2G010348 // GRMZM5G828229 // GRMZM2G067853 // GRMZM2G050825 // GRMZM2G162200 // GRMZM2G321725 // GRMZM2G025854 // GRMZM2G007021 // GRMZM2G051403 // GRMZM2G046284 // GRMZM2G063188 // GRMZM2G420436
GO:0005739	C	mitochondrion	22	504	354	39203	4.1e-09	3.9e-08	// GRMZM2G115621 // GRMZM2G102550 // GRMZM2G104081 // GRMZM2G177150 // GRMZM2G064753 // GRMZM2G145029 // GRMZM2G010348 // GRMZM2G036708 // GRMZM2G321725 // GRMZM2G381051 // GRMZM2G124820 // AC200210.1_FG006 // GRMZM2G124963 // GRMZM5G828229 // GRMZM2G079381 // GRMZM2G467356 // GRMZM5G809695 // GRMZM2G134738 // GRMZM2G003642 // GRMZM2G410710 // GRMZM2G176397 // GRMZM2G051403
GO:0034357	C	photosynthetic membrane	13	504	112	39203	8e-09	7.3e-08	// GRMZM2G039930 // GRMZM2G139512 // GRMZM2G134738 // GRMZM2G031169 // GRMZM2G064753 // GRMZM2G071450 // GRMZM2G404025 // GRMZM2G162200 // GRMZM5G870219 // GRMZM2G450659 // GRMZM2G367092 // GRMZM2G033198 // GRMZM2G472852
GO:0044425	C	membrane part	68	504	2684	39203	1.2e-07	1e-06	// GRMZM2G030731 // GRMZM5G850019 // GRMZM2G036448 // GRMZM2G115621 // GRMZM2G421565 // GRMZM2G146809 // GRMZM2G124276 // GRMZM2G013324 // GRMZM2G134888 // GRMZM5G870219 // GRMZM2G111462 // GRMZM2G007021 // GRMZM2G137779 // GRMZM2G010348 // GRMZM5G887303 // GRMZM2G131431 // GRMZM2G028721 // GRMZM2G087094 // GRMZM5G846196 // GRMZM2G039930 // GRMZM2G092793 // GRMZM2G100864 // GRMZM2G142898 // GRMZM…
GO:0005783	C	endoplasmic reticulum	16	504	230	39203	1.3e-07	1.1e-06	// GRMZM2G081682 // GRMZM2G155502 // GRMZM2G030850 // GRMZM2G100864 // GRMZM2G079236 // GRMZM2G042107 // GRMZM2G159950 // GRMZM2G305115 // GRMZM2G352132 // GRMZM2G006219 // GRMZM2G074238 // GRMZM2G001530 // GRMZM2G102550 // GRMZM2G313529 // GRMZM2G028883 // GRMZM2G118800
GO:0070469	C	respiratory chain	5	504	6	39203	1.4e-07	1.2e-06	// GRMZM2G064753 // GRMZM2G410710 // GRMZM2G134738 // GRMZM2G010348 // GRMZM2G115621
GO:0048046	C	apoplast	12	504	126	39203	2.2e-07	1.8e-06	// GRMZM2G176397 // GRMZM2G150893 // GRMZM2G003752 // GRMZM2G162200 // GRMZM2G158205 // GRMZM2G041961 // GRMZM2G025854 // GRMZM2G047592 // GRMZM2G079381 // GRMZM2G172369 // GRMZM2G047219 // GRMZM2G046284
GO:0005794	C	Golgi apparatus	10	504	138	39203	2.1e-05	0.00017	// GRMZM2G414540 // GRMZM2G137779 // GRMZM2G126865 // GRMZM2G421565 // GRMZM2G033641 // GRMZM2G124276 // GRMZM2G036099 // GRMZM2G042607 // GRMZM2G010146 // GRMZM2G146511
GO:0031226	C	intrinsic to plasma membrane	7	504	68	39203	4.8e-05	0.00037	// GRMZM2G030850 // GRMZM2G003752 // GRMZM2G111324 // GRMZM2G013324 // GRMZM2G172642 // AC213621.5_FG004 // GRMZM2G154301
GO:0015934	C	large ribosomal subunit	7	504	72	39203	6.7e-05	0.00051	// GRMZM2G030731 // GRMZM2G065868 // GRMZM2G327564 // GRMZM2G089421 // GRMZM2G166963 // GRMZM2G028883 // GRMZM2G104025
GO:0033279	C	ribosomal subunit	9	504	171	39203	0.00052	0.0039	// GRMZM2G030731 // GRMZM2G065868 // GRMZM2G129015 // GRMZM2G327564 // GRMZM2G089421 // GRMZM2G166963 // GRMZM2G028883 // GRMZM2G305154 // GRMZM2G104025
GO:0005634	C	nucleus	63	504	3212	39203	0.00065	0.0046	// GRMZM2G122076 // GRMZM2G160687 // GRMZM2G065868 // GRMZM2G310569 // GRMZM5G803355 // GRMZM2G433727 // GRMZM2G104081 // GRMZM2G072926 // GRMZM2G028883 // GRMZM2G037630 // GRMZM2G031882 // GRMZM2G359952 // GRMZM2G134260 // GRMZM2G390641 // GRMZM2G105834 // GRMZM2G476933 // GRMZM2G052581 // GRMZM2G441768 // GRMZM2G126956 // GRMZM2G370777 // GRMZM5G805026 // AC203173.3_FG004 // GRMZM2G006219 // GR…
GO:0044445	C	cytosolic part	8	504	160	39203	0.0014	0.01	// GRMZM2G030731 // GRMZM2G065868 // GRMZM2G129015 // GRMZM2G166963 // GRMZM2G089421 // GRMZM2G028883 // GRMZM2G305154 // GRMZM2G104025
GO:0031224	C	intrinsic to membrane	43	504	2183	39203	0.0044	0.03	// GRMZM2G134888 // GRMZM5G850019 // GRMZM2G036448 // GRMZM2G421565 // GRMZM2G124276 // GRMZM2G013324 // GRMZM2G111462 // GRMZM2G137779 // GRMZM2G007021 // GRMZM2G028721 // GRMZM2G310569 // GRMZM5G846196 // GRMZM2G039930 // GRMZM2G142898 // GRMZM2G003752 // GRMZM2G006219 // GRMZM2G152135 // GRMZM2G387076 // GRMZM2G033641 // GRMZM2G092793 // GRMZM2G076351 // GRMZM2G006894 // GRMZM2G028521 // GRMZM…
GO:0005576	C	extracellular region	16	504	583	39203	0.0046	0.031	// GRMZM2G445169 // GRMZM2G102946 // GRMZM2G158205 // GRMZM2G094990 // GRMZM2G150893 // GRMZM2G003752 // GRMZM2G162200 // GRMZM2G079381 // GRMZM2G176397 // GRMZM2G041961 // GRMZM2G025854 // GRMZM2G047592 // GRMZM2G327266 // GRMZM2G172369 // GRMZM2G047219 // GRMZM2G046284
GO:0044431	C	Golgi apparatus part	5	504	115	39203	0.019	0.12	// GRMZM2G036099 // GRMZM2G414540 // GRMZM2G421565 // GRMZM2G137779 // GRMZM2G010146
GO:0012505	C	endomembrane system	6	504	194	39203	0.043	0.28	// GRMZM2G137779 // GRMZM2G305115 // GRMZM2G421565 // GRMZM2G006219 // GRMZM2G007021 // GRMZM2G063188
GO:0016021	C	integral to membrane	36	504	2156	39203	0.07	0.44	// GRMZM2G134888 // GRMZM5G850019 // GRMZM2G036448 // GRMZM2G421565 // GRMZM2G124276 // GRMZM2G111462 // GRMZM2G137779 // GRMZM2G007021 // GRMZM2G028721 // GRMZM2G310569 // GRMZM5G846196 // GRMZM2G039930 // GRMZM2G142898 // GRMZM2G006219 // GRMZM2G152135 // GRMZM2G387076 // GRMZM2G033641 // GRMZM2G092793 // GRMZM2G076351 // GRMZM2G006894 // GRMZM2G028521 // GRMZM2G159950 // GRMZM2G158682 // GRMZM…
GO:0043234	C	protein complex	30	504	1824	39203	0.11	0.64	// GRMZM2G115621 // GRMZM2G065612 // GRMZM2G037630 // GRMZM2G015395 // GRMZM5G870219 // GRMZM2G441768 // GRMZM2G007021 // GRMZM2G131431 // GRMZM2G138060 // GRMZM2G060163 // GRMZM2G064753 // AC185466.3_FG001 // GRMZM2G117028 // GRMZM2G321725 // GRMZM5G861269 // GRMZM2G038313 // GRMZM2G136219 // GRMZM2G441565 // GRMZM2G402002 // GRMZM2G026580 // GRMZM2G047476 // GRMZM2G351232 // GRMZM2G701207 // GR…
GO:0015630	C	microtubule cytoskeleton	5	504	191	39203	0.11	0.64	// GRMZM2G015395 // GRMZM2G136219 // GRMZM2G078959 // GRMZM2G116542 // GRMZM5G861269
GO:0000786	C	nucleosome	7	504	320	39203	0.12	0.73	// GRMZM2G071959 // GRMZM2G070444 // GRMZM2G046055 // GRMZM2G387076 // GRMZM2G306258 // AC196961.2_FG003 // GRMZM2G084195
GO:0032993	C	protein-DNA complex	7	504	320	39203	0.12	0.73	// GRMZM2G071959 // GRMZM2G070444 // GRMZM2G046055 // GRMZM2G387076 // GRMZM2G306258 // AC196961.2_FG003 // GRMZM2G084195
GO:0044429	C	mitochondrial part	6	504	309	39203	0.21	1	// GRMZM2G134738 // GRMZM2G115621 // GRMZM2G064753 // GRMZM2G010348 // GRMZM2G321725 // GRMZM2G381051
GO:0044427	C	chromosomal part	7	504	542	39203	0.55	1	// GRMZM2G071959 // GRMZM2G070444 // GRMZM2G046055 // GRMZM2G387076 // GRMZM2G306258 // AC196961.2_FG003 // GRMZM2G084195
GO:0043232	C	intracellular non-membrane-bounded organelle	31	504	2597	39203	0.69	1	// GRMZM2G030731 // GRMZM2G065868 // GRMZM2G327564 // AC203173.3_FG004 // GRMZM2G015395 // GRMZM2G052581 // GRMZM2G007021 // GRMZM2G089421 // GRMZM2G387076 // GRMZM2G321725 // GRMZM5G861269 // GRMZM2G046284 // GRMZM2G071959 // GRMZM2G129015 // GRMZM2G166963 // GRMZM2G116542 // GRMZM2G136219 // AC196961.2_FG003 // GRMZM2G084195 // GRMZM2G047476 // GRMZM2G015011 // GRMZM2G070444 // GRMZM2G410710 //…
GO:0044430	C	cytoskeletal part	5	504	229	39203	0.18	1	// GRMZM2G015395 // GRMZM2G136219 // GRMZM2G078959 // GRMZM2G116542 // GRMZM5G861269
GO:0043228	C	non-membrane-bounded organelle	31	504	2597	39203	0.69	1	// GRMZM2G030731 // GRMZM2G065868 // GRMZM2G327564 // AC203173.3_FG004 // GRMZM2G015395 // GRMZM2G052581 // GRMZM2G007021 // GRMZM2G089421 // GRMZM2G387076 // GRMZM2G321725 // GRMZM5G861269 // GRMZM2G046284 // GRMZM2G071959 // GRMZM2G129015 // GRMZM2G166963 // GRMZM2G116542 // GRMZM2G136219 // AC196961.2_FG003 // GRMZM2G084195 // GRMZM2G047476 // GRMZM2G015011 // GRMZM2G070444 // GRMZM2G410710 //…
GO:0000785	C	chromatin	7	504	526	39203	0.52	1	// GRMZM2G071959 // GRMZM2G070444 // GRMZM2G046055 // GRMZM2G387076 // GRMZM2G306258 // AC196961.2_FG003 // GRMZM2G084195
GO:0005856	C	cytoskeleton	5	504	513	39203	0.79	1	// GRMZM2G015395 // GRMZM2G136219 // GRMZM2G078959 // GRMZM2G116542 // GRMZM5G861269
GO:0005740	C	mitochondrial envelope	5	504	280	39203	0.3	1	// GRMZM2G134738 // GRMZM2G064753 // GRMZM2G321725 // GRMZM2G010348 // GRMZM2G115621
GO:0030529	C	ribonucleoprotein complex	13	504	1484	39203	0.94	1	// GRMZM2G030731 // GRMZM2G065868 // GRMZM2G129015 // GRMZM2G327564 // GRMZM2G166963 // GRMZM2G089421 // GRMZM2G050925 // GRMZM2G077208 // GRMZM2G046284 // GRMZM2G047476 // GRMZM2G028883 // GRMZM2G305154 // GRMZM2G104025
GO:0005840	C	ribosome	13	504	1390	39203	0.91	1	// GRMZM2G030731 // GRMZM2G065868 // GRMZM2G129015 // GRMZM2G327564 // GRMZM2G166963 // GRMZM2G089421 // GRMZM2G050925 // GRMZM2G077208 // GRMZM2G046284 // GRMZM2G047476 // GRMZM2G028883 // GRMZM2G305154 // GRMZM2G104025
GO:0005694	C	chromosome	9	504	661	39203	0.48	1	// GRMZM2G071959 // GRMZM2G015011 // GRMZM2G070444 // GRMZM2G046055 // GRMZM2G387076 // GRMZM2G052581 // GRMZM2G306258 // AC196961.2_FG003 // GRMZM2G084195
GO:0032991	C	macromolecular complex	49	504	3586	39203	0.35	1	// GRMZM2G030731 // GRMZM2G065868 // GRMZM2G327564 // GRMZM2G115621 // GRMZM2G065612 // GRMZM2G037630 // GRMZM2G015395 // GRMZM5G870219 // GRMZM2G441768 // GRMZM2G007021 // GRMZM2G131431 // GRMZM2G138060 // GRMZM2G060163 // GRMZM2G064753 // GRMZM2G089421 // AC185466.3_FG001 // GRMZM2G387076 // GRMZM2G117028 // GRMZM2G321725 // GRMZM5G861269 // GRMZM2G046284 // GRMZM2G472852 // GRMZM2G071959 // GR…

## Sheet: darkorange
GO_acc	term_type	Term	queryitem	querytotal	bgitem	bgtotal	pvalue	FDR	entries
GO:0009607	P	response to biotic stimulus	20	447	31	39203	4e-26	4.8e-23	// GRMZM2G163998 // GRMZM2G160506 // GRMZM2G094352 // GRMZM2G365160 // GRMZM2G067225 // GRMZM2G368861 // GRMZM2G036921 // GRMZM2G080045 // GRMZM2G346861 // GRMZM2G080041 // GRMZM2G158734 // GRMZM2G021864 // GRMZM2G412611 // GRMZM2G104847 // GRMZM2G178190 // GRMZM2G466833 // GRMZM2G179147 // GRMZM2G471142 // GRMZM2G083427 // GRMZM2G010765
GO:0010035	P	response to inorganic substance	20	447	33	39203	1e-25	6.2e-23	// GRMZM2G039251 // GRMZM2G160506 // GRMZM2G446253 // GRMZM2G048455 // GRMZM2G132169 // GRMZM2G024718 // GRMZM2G078641 // GRMZM2G090568 // GRMZM2G178190 // GRMZM2G063676 // GRMZM5G821551 // GRMZM2G099363 // GRMZM2G456471 // GRMZM2G466833 // GRMZM2G145130 // GRMZM2G010494 // GRMZM2G126261 // GRMZM2G035620 // GRMZM2G173209 // GRMZM2G148904
GO:0048856	P	anatomical structure development	20	447	42	39203	4.3e-24	1.7e-21	// GRMZM2G150030 // GRMZM2G070961 // AC233893.1_FG003 // GRMZM2G458159 // GRMZM2G074267 // GRMZM2G099522 // GRMZM2G118250 // GRMZM2G074262 // GRMZM2G308034 // GRMZM2G171365 // GRMZM2G147780 // GRMZM2G104847 // GRMZM2G456471 // GRMZM2G169927 // GRMZM2G018589 // GRMZM5G879536 // GRMZM2G177912 // GRMZM2G179147 // GRMZM2G059102 // GRMZM2G147716
GO:0032502	P	developmental process	24	447	111	39203	7.5e-22	2.2e-19	// AC233893.1_FG003 // GRMZM2G070961 // GRMZM2G005298 // GRMZM2G059102 // GRMZM2G150030 // GRMZM2G141214 // GRMZM2G177912 // GRMZM2G179662 // GRMZM2G308034 // GRMZM2G171365 // GRMZM2G049661 // GRMZM2G147780 // GRMZM2G179147 // GRMZM2G458159 // GRMZM2G074267 // GRMZM2G099522 // GRMZM2G074262 // GRMZM2G456471 // GRMZM2G169927 // GRMZM2G147716 // GRMZM2G118250 // GRMZM2G104847 // GRMZM5G879536 // GR…
GO:0007275	P	multicellular organismal development	23	447	107	39203	6e-21	1.4e-18	// AC233893.1_FG003 // GRMZM2G070961 // GRMZM2G005298 // GRMZM2G059102 // GRMZM2G150030 // GRMZM2G141214 // GRMZM2G179662 // GRMZM2G308034 // GRMZM2G171365 // GRMZM2G049661 // GRMZM2G147780 // GRMZM2G179147 // GRMZM2G458159 // GRMZM2G074267 // GRMZM2G099522 // GRMZM2G074262 // GRMZM2G456471 // GRMZM2G169927 // GRMZM2G147716 // GRMZM2G118250 // GRMZM2G104847 // GRMZM5G879536 // GRMZM2G018589
GO:0010038	P	response to metal ion	16	447	27	39203	1e-20	2.1e-18	// GRMZM2G178190 // GRMZM2G446253 // GRMZM2G132169 // GRMZM2G078641 // GRMZM2G090568 // GRMZM2G039251 // GRMZM2G063676 // GRMZM5G821551 // GRMZM2G099363 // GRMZM2G456471 // GRMZM2G466833 // GRMZM2G145130 // GRMZM2G010494 // GRMZM2G035620 // GRMZM2G173209 // GRMZM2G148904
GO:0051704	P	multi-organism process	26	447	186	39203	2.4e-19	4.2e-17	// GRMZM2G365160 // GRMZM2G067225 // AC233893.1_FG003 // GRMZM2G346861 // GRMZM2G083427 // GRMZM2G070961 // GRMZM2G163998 // GRMZM2G179662 // GRMZM2G010765 // GRMZM2G147780 // GRMZM2G021864 // GRMZM2G178190 // GRMZM2G412611 // GRMZM2G458159 // GRMZM2G080045 // GRMZM2G080041 // GRMZM2G158734 // GRMZM2G466833 // GRMZM2G094352 // GRMZM2G160506 // GRMZM2G368861 // GRMZM2G036921 // GRMZM2G098037 // GR…
GO:0022414	P	reproductive process	19	447	85	39203	8.3e-18	1.2e-15	// GRMZM2G150030 // GRMZM2G070961 // AC233893.1_FG003 // GRMZM2G098037 // GRMZM2G458159 // GRMZM2G074267 // GRMZM2G099522 // GRMZM2G118250 // GRMZM2G308034 // GRMZM2G171365 // GRMZM2G147780 // GRMZM2G456471 // GRMZM2G169927 // GRMZM2G018589 // GRMZM2G418689 // GRMZM2G179662 // GRMZM2G179147 // GRMZM2G059102 // GRMZM2G147716
GO:0042221	P	response to chemical stimulus	40	447	626	39203	1.2e-17	1.5e-15	// GRMZM5G842695 // GRMZM2G067225 // GRMZM2G132169 // GRMZM2G145130 // GRMZM2G039251 // GRMZM2G083427 // GRMZM2G181153 // GRMZM2G004211 // GRMZM2G035620 // GRMZM2G173209 // GRMZM2G059102 // GRMZM2G124524 // GRMZM2G010765 // GRMZM5G821551 // GRMZM2G052423 // GRMZM2G024718 // GRMZM2G446253 // GRMZM2G063676 // GRMZM2G346861 // GRMZM2G178190 // GRMZM2G458159 // GRMZM2G074267 // GRMZM2G090568 // GRMZM…
GO:0070887	P	cellular response to chemical stimulus	9	447	10	39203	2.3e-13	2.7e-11	// GRMZM2G094352 // GRMZM2G062499 // GRMZM2G074267 // GRMZM2G090568 // GRMZM2G126261 // GRMZM2G052423 // GRMZM2G456644 // GRMZM2G064371 // GRMZM2G059102
GO:0010033	P	response to organic substance	14	447	72	39203	9.5e-13	1e-10	// GRMZM2G094352 // GRMZM2G160506 // GRMZM2G346861 // GRMZM2G067225 // GRMZM2G062499 // GRMZM2G074267 // GRMZM2G083427 // GRMZM2G052423 // GRMZM2G456471 // GRMZM2G456644 // GRMZM2G446253 // GRMZM2G064371 // GRMZM2G059102 // GRMZM2G124524
GO:0000003	P	reproduction	19	447	181	39203	1.8e-12	1.8e-10	// GRMZM2G150030 // GRMZM2G070961 // AC233893.1_FG003 // GRMZM2G098037 // GRMZM2G458159 // GRMZM2G074267 // GRMZM2G099522 // GRMZM2G118250 // GRMZM2G308034 // GRMZM2G171365 // GRMZM2G147780 // GRMZM2G456471 // GRMZM2G169927 // GRMZM2G018589 // GRMZM2G418689 // GRMZM2G179662 // GRMZM2G179147 // GRMZM2G059102 // GRMZM2G147716
GO:0009314	P	response to radiation	13	447	61	39203	2.2e-12	1.9e-10	// AC233893.1_FG003 // GRMZM2G024718 // GRMZM2G098714 // GRMZM2G446253 // GRMZM2G456471 // GRMZM2G090568 // GRMZM2G437912 // GRMZM2G068557 // GRMZM2G131489 // GRMZM2G179147 // GRMZM2G300135 // GRMZM2G117412 // GRMZM2G136960
GO:0009416	P	response to light stimulus	13	447	61	39203	2.2e-12	1.9e-10	// AC233893.1_FG003 // GRMZM2G024718 // GRMZM2G098714 // GRMZM2G446253 // GRMZM2G456471 // GRMZM2G090568 // GRMZM2G437912 // GRMZM2G068557 // GRMZM2G131489 // GRMZM2G179147 // GRMZM2G300135 // GRMZM2G117412 // GRMZM2G136960
GO:0009617	P	response to bacterium	9	447	16	39203	4.7e-12	3.8e-10	// GRMZM2G094352 // GRMZM2G160506 // GRMZM2G365160 // GRMZM2G178190 // GRMZM2G036921 // GRMZM2G021864 // GRMZM2G346861 // GRMZM2G080041 // GRMZM2G466833
GO:0048731	P	system development	11	447	40	39203	1.1e-11	7.9e-10	// GRMZM2G118250 // GRMZM2G074267 // GRMZM2G099522 // GRMZM2G074262 // GRMZM2G308034 // GRMZM2G171365 // GRMZM2G104847 // GRMZM5G879536 // GRMZM2G018589 // GRMZM2G059102 // GRMZM2G147716
GO:0042742	P	defense response to bacterium	8	447	12	39203	2.7e-11	1.9e-09	// GRMZM2G094352 // GRMZM2G160506 // GRMZM2G021864 // GRMZM2G178190 // GRMZM2G036921 // GRMZM2G346861 // GRMZM2G080041 // GRMZM2G466833
GO:0030154	P	cell differentiation	7	447	7	39203	7.1e-11	4.7e-09	// GRMZM2G099522 // GRMZM2G074262 // GRMZM2G171365 // GRMZM2G147780 // GRMZM2G070961 // GRMZM2G059102 // GRMZM2G147716
GO:0050896	P	response to stimulus	76	447	3421	39203	2.3e-08	1.4e-06	// GRMZM5G842695 // GRMZM2G064371 // GRMZM2G099657 // GRMZM2G365160 // GRMZM2G070961 // AC233893.1_FG003 // GRMZM2G132169 // GRMZM2G098714 // GRMZM2G300135 // GRMZM2G039251 // GRMZM2G083427 // GRMZM2G136910 // GRMZM2G181153 // GRMZM2G004211 // GRMZM2G080380 // GRMZM2G117412 // GRMZM2G035620 // GRMZM2G173209 // GRMZM2G059102 // GRMZM2G067225 // GRMZM2G171365 // GRMZM2G381709 // GRMZM2G062499 // GR…
GO:0009719	P	response to endogenous stimulus	10	447	72	39203	3.1e-08	1.9e-06	// GRMZM2G160506 // GRMZM2G074267 // GRMZM2G067225 // GRMZM2G062499 // GRMZM2G346861 // GRMZM2G052423 // GRMZM2G456644 // GRMZM2G446253 // GRMZM2G064371 // GRMZM2G059102
GO:0009620	P	response to fungus	6	447	12	39203	3.3e-08	1.9e-06	// GRMZM2G067225 // GRMZM2G368861 // GRMZM2G412611 // GRMZM2G083427 // GRMZM2G104847 // GRMZM2G179147
GO:0008361	P	regulation of cell size	5	447	5	39203	4.3e-08	2.1e-06	// AC233893.1_FG003 // GRMZM2G076049 // GRMZM2G070961 // GRMZM2G177912 // GRMZM2G147780
GO:0016049	P	cell growth	5	447	5	39203	4.3e-08	2.1e-06	// AC233893.1_FG003 // GRMZM2G076049 // GRMZM2G070961 // GRMZM2G177912 // GRMZM2G147780
GO:0009888	P	tissue development	5	447	5	39203	4.3e-08	2.1e-06	// GRMZM2G171365 // GRMZM2G099522 // GRMZM2G059102 // GRMZM2G074262 // GRMZM2G147716
GO:0040007	P	growth	5	447	7	39203	1.3e-07	6.3e-06	// AC233893.1_FG003 // GRMZM2G076049 // GRMZM2G070961 // GRMZM2G177912 // GRMZM2G147780
GO:0048519	P	negative regulation of biological process	8	447	49	39203	2.5e-07	1.1e-05	// GRMZM2G021864 // GRMZM2G171365 // GRMZM2G099522 // GRMZM2G010775 // GRMZM2G341027 // GRMZM2G436226 // GRMZM2G059102 // GRMZM2G147716
GO:0048523	P	negative regulation of cellular process	7	447	42	39203	1.3e-06	5.6e-05	// GRMZM2G021864 // GRMZM2G171365 // GRMZM2G099522 // GRMZM2G341027 // GRMZM2G436226 // GRMZM2G059102 // GRMZM2G147716
GO:0051716	P	cellular response to stimulus	16	447	324	39203	2e-06	8.5e-05	// GRMZM2G094352 // GRMZM2G064371 // GRMZM2G381709 // GRMZM2G021864 // GRMZM2G018375 // GRMZM2G090172 // GRMZM2G074267 // GRMZM2G090568 // GRMZM2G080041 // GRMZM2G126261 // GRMZM2G052423 // GRMZM2G062499 // GRMZM2G080380 // GRMZM2G456644 // GRMZM2G136960 // GRMZM2G059102
GO:0009725	P	response to hormone stimulus	8	447	72	39203	3.5e-06	0.00014	// GRMZM2G074267 // GRMZM2G062499 // GRMZM2G346861 // GRMZM2G052423 // GRMZM2G456644 // GRMZM2G446253 // GRMZM2G064371 // GRMZM2G059102
GO:0009856	P	pollination	7	447	56	39203	7.1e-06	0.00028	// GRMZM2G179662 // AC233893.1_FG003 // GRMZM2G098037 // GRMZM2G458159 // GRMZM2G147780 // GRMZM2G070961 // GRMZM2G418689
GO:0006730	P	one-carbon metabolic process	9	447	124	39203	2.2e-05	0.00083	// GRMZM2G021044 // GRMZM2G150248 // GRMZM2G131708 // GRMZM2G146490 // GRMZM2G169927 // GRMZM2G099363 // GRMZM2G311036 // GRMZM2G436226 // GRMZM2G148904
GO:0019684	P	photosynthesis, light reaction	6	447	45	39203	2.3e-05	0.00086	// GRMZM2G348873 // GRMZM2G087435 // GRMZM2G068557 // GRMZM2G131489 // GRMZM2G117412 // GRMZM2G038519
GO:0009414	P	response to water deprivation	5	447	26	39203	2.4e-05	0.00086	// GRMZM2G052423 // GRMZM2G101287 // GRMZM2G179147 // GRMZM2G181153 // GRMZM2G300135
GO:0032535	P	regulation of cellular component size	5	447	27	39203	2.8e-05	0.00095	// AC233893.1_FG003 // GRMZM2G076049 // GRMZM2G070961 // GRMZM2G177912 // GRMZM2G147780
GO:0090066	P	regulation of anatomical structure size	5	447	27	39203	2.8e-05	0.00095	// AC233893.1_FG003 // GRMZM2G076049 // GRMZM2G070961 // GRMZM2G177912 // GRMZM2G147780
GO:0032259	P	methylation	8	447	100	39203	3.2e-05	0.0011	// GRMZM2G021044 // GRMZM2G150248 // GRMZM2G131708 // GRMZM2G169927 // GRMZM2G099363 // GRMZM2G311036 // GRMZM2G436226 // GRMZM2G148904
GO:0044281	P	small molecule metabolic process	54	447	2730	39203	7.4e-05	0.0024	// GRMZM2G069229 // GRMZM2G301553 // GRMZM2G365160 // GRMZM2G067225 // AC233893.1_FG003 // GRMZM2G132169 // GRMZM2G446253 // GRMZM5G848696 // GRMZM2G083427 // GRMZM5G874903 // GRMZM2G046498 // GRMZM2G080380 // GRMZM2G046804 // GRMZM2G073814 // GRMZM2G137694 // GRMZM2G173209 // GRMZM2G124524 // GRMZM2G141214 // GRMZM2G177912 // GRMZM2G150248 // GRMZM2G168304 // GRMZM5G821551 // GRMZM2G146490 // GR…
GO:0044283	P	small molecule biosynthetic process	21	447	708	39203	0.0001	0.0032	// GRMZM2G160506 // GRMZM2G018375 // GRMZM2G365160 // AC233893.1_FG003 // GRMZM2G177912 // GRMZM2G069203 // GRMZM2G126002 // GRMZM2G437912 // GRMZM2G083427 // GRMZM2G004590 // GRMZM2G046498 // GRMZM2G104847 // GRMZM2G032095 // GRMZM5G861357 // GRMZM2G099363 // GRMZM2G080380 // GRMZM2G456471 // GRMZM2G073814 // GRMZM2G137694 // GRMZM2G168304 // GRMZM2G537291
GO:0009415	P	response to water	5	447	38	39203	0.00012	0.0037	// GRMZM2G052423 // GRMZM2G101287 // GRMZM2G179147 // GRMZM2G181153 // GRMZM2G300135
GO:0019748	P	secondary metabolic process	7	447	94	39203	0.00015	0.0046	// GRMZM2G177912 // GRMZM2G132169 // GRMZM5G848696 // GRMZM5G874903 // GRMZM2G046498 // GRMZM2G179147 // GRMZM2G099363
GO:0006631	P	fatty acid metabolic process	9	447	187	39203	0.00042	0.012	// GRMZM2G141214 // GRMZM2G067225 // AC233893.1_FG003 // GRMZM2G083427 // GRMZM2G104847 // GRMZM2G032095 // GRMZM2G060011 // GRMZM2G137694 // GRMZM2G168304
GO:0044248	P	cellular catabolic process	21	447	806	39203	0.00054	0.015	// GRMZM2G069542 // GRMZM5G856653 // GRMZM2G446253 // GRMZM2G124524 // GRMZM5G848696 // GRMZM2G132169 // GRMZM2G412611 // GRMZM2G075104 // GRMZM2G150248 // GRMZM2G090568 // GRMZM2G126261 // GRMZM2G341027 // GRMZM2G049661 // GRMZM2G004222 // GRMZM2G466833 // GRMZM2G333183 // GRMZM2G172932 // GRMZM2G177947 // GRMZM2G046804 // GRMZM5G874903 // GRMZM2G060324
GO:0006766	P	vitamin metabolic process	6	447	88	39203	0.0007	0.019	// GRMZM2G160506 // GRMZM2G018375 // GRMZM2G046498 // GRMZM2G456471 // GRMZM5G861357 // GRMZM2G126002
GO:0009110	P	vitamin biosynthetic process	6	447	88	39203	0.0007	0.019	// GRMZM2G160506 // GRMZM2G018375 // GRMZM2G046498 // GRMZM2G456471 // GRMZM5G861357 // GRMZM2G126002
GO:0016053	P	organic acid biosynthetic process	15	447	492	39203	0.00074	0.019	// GRMZM2G160506 // GRMZM2G365160 // AC233893.1_FG003 // GRMZM2G069203 // GRMZM2G126002 // GRMZM2G437912 // GRMZM2G083427 // GRMZM2G004590 // GRMZM2G104847 // GRMZM2G032095 // GRMZM2G456471 // GRMZM2G073814 // GRMZM2G137694 // GRMZM2G168304 // GRMZM2G537291
GO:0046394	P	carboxylic acid biosynthetic process	15	447	492	39203	0.00074	0.019	// GRMZM2G160506 // GRMZM2G365160 // AC233893.1_FG003 // GRMZM2G069203 // GRMZM2G126002 // GRMZM2G437912 // GRMZM2G083427 // GRMZM2G004590 // GRMZM2G104847 // GRMZM2G032095 // GRMZM2G456471 // GRMZM2G073814 // GRMZM2G137694 // GRMZM2G168304 // GRMZM2G537291
GO:0032787	P	monocarboxylic acid metabolic process	10	447	252	39203	0.00086	0.022	// GRMZM2G141214 // GRMZM2G067225 // AC233893.1_FG003 // GRMZM2G083427 // GRMZM2G104847 // GRMZM2G032095 // GRMZM2G179147 // GRMZM2G060011 // GRMZM2G137694 // GRMZM2G168304
GO:0044255	P	cellular lipid metabolic process	14	447	474	39203	0.0015	0.036	// GRMZM2G133082 // GRMZM2G141214 // GRMZM2G067225 // AC233893.1_FG003 // GRMZM2G157267 // GRMZM2G083427 // GRMZM2G104847 // GRMZM2G032095 // GRMZM2G179147 // GRMZM2G060011 // GRMZM2G110834 // GRMZM2G137694 // GRMZM2G168304 // GRMZM2G124524
GO:0019438	P	aromatic compound biosynthetic process	6	447	104	39203	0.0016	0.039	// GRMZM2G365160 // GRMZM2G177912 // GRMZM2G018375 // GRMZM2G437912 // GRMZM2G004590 // GRMZM2G099363
GO:0009056	P	catabolic process	23	447	1005	39203	0.0016	0.039	// GRMZM2G124524 // GRMZM2G132169 // GRMZM2G446253 // GRMZM2G069542 // GRMZM2G341027 // GRMZM2G046804 // GRMZM2G150248 // GRMZM2G075104 // GRMZM5G874903 // GRMZM2G049661 // GRMZM5G856653 // GRMZM2G177947 // GRMZM5G848696 // GRMZM2G412611 // GRMZM2G172932 // GRMZM2G090568 // GRMZM2G126261 // GRMZM2G004222 // GRMZM2G466833 // GRMZM2G096764 // GRMZM2G060324 // GRMZM2G333183 // GRMZM2G175218
GO:0006952	P	defense response	16	447	608	39203	0.0022	0.051	// GRMZM2G094352 // GRMZM2G160506 // GRMZM2G021864 // GRMZM2G368861 // GRMZM2G036921 // GRMZM2G346861 // GRMZM2G010775 // GRMZM2G080041 // GRMZM2G158734 // GRMZM2G104847 // GRMZM2G027479 // GRMZM2G466833 // GRMZM2G179147 // GRMZM2G471142 // GRMZM2G178190 // GRMZM2G163998
GO:0042180	P	cellular ketone metabolic process	25	447	1198	39203	0.0034	0.079	// GRMZM2G301553 // GRMZM2G365160 // GRMZM2G067225 // AC233893.1_FG003 // GRMZM5G848696 // GRMZM2G083427 // GRMZM2G080380 // GRMZM2G073814 // GRMZM2G137694 // GRMZM2G168304 // GRMZM2G141214 // GRMZM5G821551 // GRMZM2G437912 // GRMZM2G004590 // GRMZM2G456471 // GRMZM2G466833 // GRMZM2G126002 // GRMZM2G537291 // GRMZM2G160506 // GRMZM2G069203 // GRMZM2G104847 // GRMZM2G032095 // GRMZM2G179147 // GR…
GO:0006767	P	water-soluble vitamin metabolic process	5	447	87	39203	0.0039	0.087	// GRMZM2G160506 // GRMZM2G046498 // GRMZM2G456471 // GRMZM2G126002 // GRMZM2G018375
GO:0042364	P	water-soluble vitamin biosynthetic process	5	447	87	39203	0.0039	0.087	// GRMZM2G160506 // GRMZM2G046498 // GRMZM2G456471 // GRMZM2G126002 // GRMZM2G018375
GO:0043436	P	oxoacid metabolic process	24	447	1186	39203	0.0059	0.12	// GRMZM2G301553 // GRMZM2G365160 // GRMZM2G067225 // AC233893.1_FG003 // GRMZM5G848696 // GRMZM2G083427 // GRMZM2G080380 // GRMZM2G073814 // GRMZM2G137694 // GRMZM2G168304 // GRMZM2G141214 // GRMZM5G821551 // GRMZM2G437912 // GRMZM2G004590 // GRMZM2G456471 // GRMZM2G466833 // GRMZM2G126002 // GRMZM2G537291 // GRMZM2G160506 // GRMZM2G069203 // GRMZM2G104847 // GRMZM2G032095 // GRMZM2G179147 // GR…
GO:0007154	P	cell communication	8	447	229	39203	0.0058	0.12	// GRMZM2G141214 // GRMZM2G381709 // GRMZM2G098037 // GRMZM2G090568 // GRMZM2G052423 // GRMZM2G418689 // GRMZM2G080380 // GRMZM2G138349
GO:0019752	P	carboxylic acid metabolic process	24	447	1186	39203	0.0059	0.12	// GRMZM2G301553 // GRMZM2G365160 // GRMZM2G067225 // AC233893.1_FG003 // GRMZM5G848696 // GRMZM2G083427 // GRMZM2G080380 // GRMZM2G073814 // GRMZM2G137694 // GRMZM2G168304 // GRMZM2G141214 // GRMZM5G821551 // GRMZM2G437912 // GRMZM2G004590 // GRMZM2G456471 // GRMZM2G466833 // GRMZM2G126002 // GRMZM2G537291 // GRMZM2G160506 // GRMZM2G069203 // GRMZM2G104847 // GRMZM2G032095 // GRMZM2G179147 // GR…
GO:0006082	P	organic acid metabolic process	24	447	1188	39203	0.006	0.12	// GRMZM2G301553 // GRMZM2G365160 // GRMZM2G067225 // AC233893.1_FG003 // GRMZM5G848696 // GRMZM2G083427 // GRMZM2G080380 // GRMZM2G073814 // GRMZM2G137694 // GRMZM2G168304 // GRMZM2G141214 // GRMZM5G821551 // GRMZM2G437912 // GRMZM2G004590 // GRMZM2G456471 // GRMZM2G466833 // GRMZM2G126002 // GRMZM2G537291 // GRMZM2G160506 // GRMZM2G069203 // GRMZM2G104847 // GRMZM2G032095 // GRMZM2G179147 // GR…
GO:0016567	P	protein ubiquitination	6	447	139	39203	0.0062	0.13	// GRMZM2G062499 // GRMZM2G075104 // GRMZM2G049661 // GRMZM2G136313 // GRMZM2G152919 // GRMZM2G073310
GO:0070647	P	protein modification by small protein conjugation or removal	6	447	142	39203	0.0068	0.13	// GRMZM2G062499 // GRMZM2G075104 // GRMZM2G049661 // GRMZM2G136313 // GRMZM2G152919 // GRMZM2G073310
GO:0032446	P	protein modification by small protein conjugation	6	447	142	39203	0.0068	0.13	// GRMZM2G062499 // GRMZM2G075104 // GRMZM2G049661 // GRMZM2G136313 // GRMZM2G152919 // GRMZM2G073310
GO:0009605	P	response to external stimulus	11	447	405	39203	0.0082	0.16	// GRMZM2G381709 // GRMZM2G365160 // GRMZM2G067225 // GRMZM2G458159 // GRMZM2G074267 // GRMZM2G090568 // GRMZM2G080041 // GRMZM2G052423 // GRMZM2G456471 // GRMZM2G080380 // GRMZM2G136960
GO:0015979	P	photosynthesis	6	447	149	39203	0.0085	0.16	// GRMZM2G348873 // GRMZM2G087435 // GRMZM2G068557 // GRMZM2G131489 // GRMZM2G117412 // GRMZM2G038519
GO:0006091	P	generation of precursor metabolites and energy	16	447	705	39203	0.0085	0.16	// GRMZM2G069229 // GRMZM2G088753 // GRMZM2G124524 // GRMZM2G301194 // GRMZM2G348873 // GRMZM2G446253 // GRMZM2G069542 // GRMZM2G087435 // GRMZM2G046804 // GRMZM2G068557 // GRMZM2G131489 // GRMZM5G856653 // GRMZM2G177947 // GRMZM2G117412 // GRMZM2G038519 // GRMZM2G466833
GO:0065009	P	regulation of molecular function	8	447	258	39203	0.011	0.2	// GRMZM2G118037 // GRMZM2G436199 // AC186577.3_FG006 // GRMZM2G363437 // GRMZM2G080041 // GRMZM5G879536 // GRMZM2G013986 // GRMZM2G138349
GO:0006950	P	response to stress	49	447	3059	39203	0.011	0.2	// GRMZM2G099657 // GRMZM2G365160 // GRMZM2G067225 // AC233893.1_FG003 // GRMZM2G346861 // GRMZM2G136910 // GRMZM2G181153 // GRMZM2G004211 // GRMZM2G080380 // GRMZM2G070961 // GRMZM2G163998 // GRMZM2G381709 // GRMZM2G090172 // GRMZM2G171365 // GRMZM2G052423 // GRMZM2G092910 // GRMZM2G027479 // GRMZM2G024718 // GRMZM2G136960 // GRMZM2G063676 // GRMZM2G021864 // GRMZM2G446253 // GRMZM2G178190 // GR…
GO:0006633	P	fatty acid biosynthetic process	6	447	159	39203	0.011	0.2	// AC233893.1_FG003 // GRMZM2G083427 // GRMZM2G104847 // GRMZM2G032095 // GRMZM2G137694 // GRMZM2G168304
GO:0033554	P	cellular response to stress	9	447	314	39203	0.012	0.2	// GRMZM2G021864 // GRMZM2G381709 // GRMZM2G018375 // GRMZM2G090172 // GRMZM2G090568 // GRMZM2G080041 // GRMZM2G126261 // GRMZM2G052423 // GRMZM2G080380
GO:0016043	P	cellular component organization	24	447	1290	39203	0.015	0.26	// GRMZM2G360541 // GRMZM2G099657 // GRMZM2G181153 // GRMZM2G177912 // GRMZM2G087435 // GRMZM2G076544 // GRMZM2G341027 // AC233893.1_FG003 // GRMZM2G070961 // GRMZM2G059106 // GRMZM2G047813 // GRMZM2G100714 // GRMZM2G147780 // GRMZM2G080041 // GRMZM2G121115 // GRMZM2G172932 // GRMZM2G335419 // GRMZM2G086779 // GRMZM2G021044 // GRMZM2G112337 // GRMZM2G074262 // GRMZM2G436226 // GRMZM2G003769 // GR…
GO:0007017	P	microtubule-based process	9	447	334	39203	0.017	0.28	// GRMZM2G360541 // GRMZM2G301194 // GRMZM2G100714 // GRMZM2G172932 // GRMZM2G112337 // GRMZM2G122965 // GRMZM2G074262 // GRMZM2G346133 // GRMZM2G037472
GO:0006732	P	coenzyme metabolic process	7	447	237	39203	0.021	0.36	// GRMZM2G043147 // GRMZM5G848696 // GRMZM2G069542 // GRMZM2G046498 // GRMZM2G466833 // GRMZM5G861357 // GRMZM5G874903
GO:0006629	P	lipid metabolic process	20	447	1068	39203	0.024	0.39	// GRMZM2G133082 // GRMZM2G007252 // GRMZM2G141214 // GRMZM2G048200 // GRMZM2G067225 // AC233893.1_FG003 // GRMZM2G157267 // GRMZM2G060866 // GRMZM2G153274 // GRMZM2G083427 // GRMZM2G035636 // GRMZM2G104847 // GRMZM2G032095 // GRMZM2G179147 // GRMZM2G060011 // GRMZM2G110834 // GRMZM2G137694 // GRMZM2G168304 // GRMZM2G044947 // GRMZM2G124524
GO:0009628	P	response to abiotic stimulus	31	447	1856	39203	0.024	0.4	// GRMZM2G099657 // AC233893.1_FG003 // GRMZM2G446253 // GRMZM2G181153 // GRMZM2G117412 // GRMZM2G059102 // GRMZM2G171365 // GRMZM2G052423 // GRMZM2G131489 // GRMZM2G136960 // GRMZM2G063676 // GRMZM2G412611 // GRMZM2G024718 // GRMZM2G098714 // GRMZM2G074267 // GRMZM2G123977 // GRMZM2G437912 // GRMZM2G090568 // GRMZM2G456471 // GRMZM2G169927 // GRMZM2G300135 // GRMZM2G066165 // GRMZM2G094352 // GR…
GO:0050790	P	regulation of catalytic activity	7	447	255	39203	0.03	0.48	// GRMZM2G363437 // GRMZM2G436199 // AC186577.3_FG006 // GRMZM2G118037 // GRMZM5G879536 // GRMZM2G013986 // GRMZM2G138349
GO:0044275	P	cellular carbohydrate catabolic process	8	447	332	39203	0.04	0.64	// GRMZM2G124524 // GRMZM2G412611 // GRMZM2G446253 // GRMZM5G848696 // GRMZM5G874903 // GRMZM5G856653 // GRMZM2G177947 // GRMZM2G046804
GO:0019318	P	hexose metabolic process	10	447	457	39203	0.041	0.64	// GRMZM2G088753 // GRMZM2G124524 // GRMZM2G021846 // GRMZM2G446253 // GRMZM5G848696 // GRMZM5G874903 // GRMZM2G456471 // GRMZM5G856653 // GRMZM2G177947 // GRMZM2G046804
GO:0008610	P	lipid biosynthetic process	10	447	461	39203	0.043	0.66	// GRMZM2G133082 // GRMZM2G007252 // GRMZM2G124524 // AC233893.1_FG003 // GRMZM2G083427 // GRMZM2G104847 // GRMZM2G032095 // GRMZM2G110834 // GRMZM2G137694 // GRMZM2G168304
GO:0044282	P	small molecule catabolic process	9	447	405	39203	0.047	0.72	// GRMZM2G124524 // GRMZM2G132169 // GRMZM2G446253 // GRMZM5G848696 // GRMZM5G874903 // GRMZM5G856653 // GRMZM2G177947 // GRMZM2G046804 // GRMZM2G150248
GO:0016052	P	carbohydrate catabolic process	9	447	408	39203	0.048	0.72	// GRMZM5G856653 // GRMZM2G124524 // GRMZM2G412611 // GRMZM2G446253 // GRMZM5G848696 // GRMZM5G874903 // GRMZM2G175218 // GRMZM2G177947 // GRMZM2G046804
GO:0034220	P	ion transmembrane transport	5	447	170	39203	0.049	0.72	// GRMZM2G331417 // GRMZM2G107306 // GRMZM2G080041 // GRMZM2G177912 // GRMZM2G069229
GO:0043623	P	cellular protein complex assembly	6	447	226	39203	0.049	0.72	// GRMZM2G360541 // GRMZM2G112337 // GRMZM2G076544 // GRMZM2G087435 // GRMZM2G172932 // GRMZM2G335419
GO:0006725	P	cellular aromatic compound metabolic process	9	447	410	39203	0.05	0.72	// GRMZM2G008792 // GRMZM2G018375 // GRMZM2G365160 // GRMZM2G177912 // GRMZM2G132169 // GRMZM2G437912 // GRMZM2G004590 // GRMZM2G099363 // GRMZM2G080380
GO:0044262	P	cellular carbohydrate metabolic process	17	447	959	39203	0.053	0.76	// GRMZM5G848696 // GRMZM2G160506 // GRMZM2G164912 // GRMZM2G088753 // GRMZM2G124524 // GRMZM2G021846 // GRMZM2G446253 // GRMZM2G104092 // GRMZM5G874903 // GRMZM2G412611 // GRMZM2G456471 // GRMZM2G466833 // GRMZM5G856653 // GRMZM2G177947 // GRMZM2G046804 // GRMZM2G153274 // GRMZM2G316534
GO:0016051	P	carbohydrate biosynthetic process	7	447	293	39203	0.055	0.78	// GRMZM2G160506 // GRMZM2G164912 // GRMZM2G088753 // GRMZM2G177912 // GRMZM2G104092 // GRMZM2G142437 // GRMZM2G456471
GO:0005996	P	monosaccharide metabolic process	10	447	497	39203	0.063	0.89	// GRMZM2G088753 // GRMZM2G124524 // GRMZM2G021846 // GRMZM2G446253 // GRMZM5G848696 // GRMZM5G874903 // GRMZM2G456471 // GRMZM5G856653 // GRMZM2G177947 // GRMZM2G046804
GO:0008104	P	protein localization	7	447	890	39203	0.88	1	// GRMZM2G168017 // GRMZM2G014854 // GRMZM2G060324 // GRMZM2G107205 // GRMZM2G128454 // GRMZM2G059106 // GRMZM2G179789
GO:0080090	P	regulation of primary metabolic process	33	447	3595	39203	0.92	1	// GRMZM2G360541 // GRMZM2G037792 // GRMZM2G124524 // GRMZM2G177912 // GRMZM2G114998 // GRMZM2G172621 // GRMZM2G341027 // GRMZM2G041223 // GRMZM2G105335 // GRMZM2G059102 // GRMZM2G157722 // GRMZM2G135703 // GRMZM2G438293 // GRMZM2G099862 // GRMZM2G088427 // GRMZM2G169654 // GRMZM2G121115 // GRMZM2G021864 // GRMZM2G043813 // GRMZM2G099522 // GRMZM2G171365 // GRMZM2G073805 // GRMZM2G137532 // GRMZM…
GO:0019222	P	regulation of metabolic process	38	447	3667	39203	0.75	1	// GRMZM2G360541 // GRMZM2G037792 // GRMZM2G124524 // GRMZM2G177912 // GRMZM2G114998 // GRMZM2G172621 // GRMZM2G341027 // GRMZM2G041223 // GRMZM2G105335 // GRMZM5G878070 // GRMZM2G059102 // GRMZM2G157722 // GRMZM2G135703 // GRMZM2G438293 // GRMZM2G099862 // GRMZM2G363437 // GRMZM2G088427 // GRMZM2G169654 // GRMZM2G146490 // GRMZM2G121115 // GRMZM2G021864 // GRMZM2G043813 // GRMZM2G099522 // GRMZM…
GO:0006519	P	cellular amino acid and derivative metabolic process	14	447	985	39203	0.24	1	// GRMZM2G301553 // GRMZM2G365160 // GRMZM2G177912 // GRMZM2G132169 // GRMZM2G150248 // GRMZM2G437912 // GRMZM5G848696 // GRMZM5G821551 // GRMZM2G004590 // GRMZM2G069203 // GRMZM2G099363 // GRMZM2G080380 // GRMZM2G073814 // GRMZM2G537291
GO:0007165	P	signal transduction	9	447	711	39203	0.42	1	// GRMZM2G094352 // GRMZM2G064371 // GRMZM2G074267 // GRMZM2G383240 // GRMZM2G138349 // GRMZM2G456644 // GRMZM2G048455 // GRMZM2G059102 // GRMZM2G108991
GO:0070727	P	cellular macromolecule localization	6	447	562	39203	0.62	1	// GRMZM2G168017 // GRMZM2G014854 // GRMZM2G080041 // GRMZM2G060324 // GRMZM2G107205 // GRMZM2G179789
GO:0006979	P	response to oxidative stress	6	447	315	39203	0.16	1	// GRMZM2G024718 // GRMZM2G103169 // GRMZM2G090568 // GRMZM2G126261 // GRMZM2G004211 // GRMZM2G048455
GO:0016310	P	phosphorylation	32	447	2743	39203	0.47	1	// GRMZM2G139223 // AC235547.1_FG005 // GRMZM2G070961 // GRMZM2G179789 // GRMZM5G878070 // GRMZM2G173209 // GRMZM2G179279 // GRMZM2G179662 // GRMZM2G157267 // GRMZM2G363437 // GRMZM2G180160 // GRMZM2G412611 // GRMZM2G177947 // GRMZM2G021846 // GRMZM2G383240 // GRMZM2G074262 // GRMZM2G004590 // GRMZM2G080041 // GRMZM2G700291 // GRMZM2G418689 // GRMZM2G456644 // GRMZM2G002531 // GRMZM2G162781 // GR…
GO:0034621	P	cellular macromolecular complex subunit organization	10	447	600	39203	0.15	1	// GRMZM2G360541 // GRMZM2G099657 // GRMZM2G047813 // GRMZM2G087435 // GRMZM2G076544 // GRMZM2G341027 // GRMZM2G112337 // GRMZM2G181153 // GRMZM2G172932 // GRMZM2G335419
GO:0033036	P	macromolecule localization	8	447	997	39203	0.88	1	// GRMZM2G168017 // GRMZM2G014854 // GRMZM2G080041 // GRMZM2G060324 // GRMZM2G107205 // GRMZM2G128454 // GRMZM2G059106 // GRMZM2G179789
GO:0060255	P	regulation of macromolecule metabolic process	35	447	3632	39203	0.87	1	// GRMZM2G360541 // GRMZM2G037792 // GRMZM2G124524 // GRMZM2G114998 // GRMZM2G172621 // GRMZM2G341027 // GRMZM2G041223 // GRMZM2G105335 // GRMZM5G878070 // GRMZM2G059102 // GRMZM2G157722 // GRMZM2G135703 // GRMZM2G438293 // GRMZM2G099862 // GRMZM2G088427 // GRMZM2G169654 // GRMZM2G146490 // GRMZM2G121115 // GRMZM2G021864 // GRMZM2G043813 // GRMZM2G099522 // GRMZM2G171365 // GRMZM2G073805 // GRMZM…
GO:0045184	P	establishment of protein localization	7	447	864	39203	0.86	1	// GRMZM2G168017 // GRMZM2G014854 // GRMZM2G060324 // GRMZM2G107205 // GRMZM2G128454 // GRMZM2G059106 // GRMZM2G179789
GO:0055114	P	oxidation reduction	31	447	2743	39203	0.55	1	// AF466202.2_FG007 // GRMZM2G008792 // GRMZM2G067225 // GRMZM2G132169 // GRMZM5G848696 // GRMZM2G004211 // GRMZM2G046804 // GRMZM2G073814 // GRMZM2G091588 // GRMZM2G141376 // GRMZM2G007252 // GRMZM2G141214 // GRMZM2G062151 // GRMZM2G150248 // GRMZM2G057910 // GRMZM2G341460 // GRMZM2G044469 // GRMZM2G013448 // GRMZM2G081016 // GRMZM2G090568 // GRMZM2G126261 // GRMZM2G004222 // GRMZM2G068557 // GR…
GO:0046483	P	heterocycle metabolic process	10	447	797	39203	0.43	1	// GRMZM2G008792 // GRMZM2G004222 // GRMZM2G069229 // GRMZM2G060324 // GRMZM2G018375 // GRMZM2G099363 // GRMZM2G333183 // GRMZM2G172932 // GRMZM2G080380 // GRMZM2G173209
GO:0065008	P	regulation of biological quality	13	447	2139	39203	1	1	// GRMZM2G008792 // GRMZM2G381709 // GRMZM2G177912 // AC233893.1_FG003 // GRMZM2G178190 // GRMZM2G074267 // GRMZM2G107306 // GRMZM2G147780 // GRMZM2G073774 // GRMZM2G070961 // GRMZM2G076049 // GRMZM5G878070 // GRMZM2G436199
GO:0016192	P	vesicle-mediated transport	7	447	397	39203	0.17	1	// GRMZM2G168017 // GRMZM2G080041 // GRMZM2G177227 // GRMZM2G174797 // GRMZM2G179789 // GRMZM2G335419 // GRMZM2G059106
GO:0019538	P	protein metabolic process	76	447	7175	39203	0.78	1	// GRMZM2G301553 // GRMZM2G139223 // GRMZM2G136313 // GRMZM2G057329 // GRMZM2G348873 // GRMZM2G071573 // AC235547.1_FG005 // GRMZM2G123940 // GRMZM2G076544 // GRMZM2G341027 // GRMZM2G155753 // GRMZM2G099657 // GRMZM2G149257 // GRMZM2G070961 // GRMZM5G826194 // GRMZM2G179789 // GRMZM5G878070 // GRMZM2G179279 // GRMZM5G821551 // GRMZM2G133249 // GRMZM2G140116 // GRMZM2G417770 // GRMZM2G179662 // GR…
GO:0002376	P	immune system process	5	447	363	39203	0.4	1	// GRMZM2G094352 // GRMZM2G021864 // GRMZM2G346861 // GRMZM2G163998 // GRMZM2G158734
GO:0019320	P	hexose catabolic process	7	447	318	39203	0.077	1	// GRMZM2G124524 // GRMZM2G446253 // GRMZM5G848696 // GRMZM5G874903 // GRMZM5G856653 // GRMZM2G177947 // GRMZM2G046804
GO:0022607	P	cellular component assembly	11	447	909	39203	0.46	1	// GRMZM2G360541 // GRMZM2G099657 // GRMZM2G047813 // GRMZM2G436226 // GRMZM2G087435 // GRMZM2G076544 // GRMZM2G341027 // GRMZM2G112337 // GRMZM2G181153 // GRMZM2G172932 // GRMZM2G335419
GO:0006807	P	nitrogen compound metabolic process	64	447	6937	39203	0.98	1	// GRMZM2G360541 // GRMZM2G008792 // GRMZM2G125976 // GRMZM2G365160 // GRMZM2G124524 // GRMZM2G069229 // GRMZM5G825512 // GRMZM2G172621 // GRMZM5G848696 // GRMZM2G341027 // GRMZM2G105335 // GRMZM2G046498 // GRMZM2G041223 // GRMZM2G080380 // GRMZM2G130207 // GRMZM2G301553 // GRMZM2G173209 // GRMZM2G059102 // GRMZM2G157722 // GRMZM2G169654 // GRMZM2G438293 // GRMZM2G150248 // GRMZM2G090172 // GRMZM…
GO:0050789	P	regulation of biological process	54	447	4504	39203	0.37	1	// GRMZM2G360541 // GRMZM2G037792 // GRMZM2G124524 // GRMZM2G177912 // GRMZM2G114998 // GRMZM2G172621 // GRMZM2G341027 // GRMZM2G041223 // GRMZM2G105335 // GRMZM2G138349 // GRMZM5G878070 // GRMZM2G059102 // GRMZM2G157722 // GRMZM2G135703 // GRMZM2G438293 // GRMZM2G099862 // GRMZM2G363437 // GRMZM2G088427 // GRMZM2G169654 // GRMZM2G146490 // GRMZM2G147780 // GRMZM2G171365 // GRMZM2G121115 // GRMZM…
GO:0006163	P	purine nucleotide metabolic process	5	447	404	39203	0.49	1	// GRMZM2G060324 // GRMZM2G069229 // GRMZM2G173209 // GRMZM2G333183 // GRMZM2G172932
GO:0044264	P	cellular polysaccharide metabolic process	5	447	243	39203	0.15	1	// GRMZM2G412611 // GRMZM2G160506 // GRMZM2G164912 // GRMZM2G088753 // GRMZM2G104092
GO:0051186	P	cofactor metabolic process	9	447	461	39203	0.087	1	// GRMZM5G848696 // GRMZM2G043147 // GRMZM2G069542 // GRMZM2G399338 // GRMZM5G874903 // GRMZM2G004222 // GRMZM2G046498 // GRMZM2G466833 // GRMZM5G861357
GO:0044260	P	cellular macromolecule metabolic process	109	447	11296	39203	0.98	1	// GRMZM2G301553 // GRMZM2G139223 // GRMZM5G825512 // GRMZM2G172621 // GRMZM2G149257 // GRMZM2G070961 // GRMZM2G164912 // GRMZM2G179662 // GRMZM2G049661 // GRMZM2G099862 // GRMZM2G169654 // GRMZM2G069594 // GRMZM2G162445 // GRMZM2G094352 // GRMZM2G099522 // GRMZM2G068471 // GRMZM2G158734 // GRMZM2G114998 // AC234157.1_FG002 // GRMZM2G137532 // GRMZM2G098037 // GRMZM2G010775 // GRMZM5G879536 // GR…
GO:0006886	P	intracellular protein transport	5	447	554	39203	0.76	1	// GRMZM2G060324 // GRMZM2G179789 // GRMZM2G014854 // GRMZM2G107205 // GRMZM2G168017
GO:0051188	P	cofactor biosynthetic process	5	447	324	39203	0.31	1	// GRMZM2G043147 // GRMZM2G004222 // GRMZM2G046498 // GRMZM5G861357 // GRMZM2G399338
GO:0065003	P	macromolecular complex assembly	11	447	882	39203	0.43	1	// GRMZM2G360541 // GRMZM2G099657 // GRMZM2G047813 // GRMZM2G436226 // GRMZM2G087435 // GRMZM2G076544 // GRMZM2G341027 // GRMZM2G112337 // GRMZM2G181153 // GRMZM2G172932 // GRMZM2G335419
GO:0065007	P	biological regulation	64	447	6272	39203	0.85	1	// GRMZM2G360541 // GRMZM2G008792 // GRMZM2G125976 // GRMZM2G124524 // GRMZM2G177912 // GRMZM2G114998 // GRMZM2G172621 // GRMZM2G341027 // GRMZM2G041223 // GRMZM2G070961 // GRMZM2G118037 // GRMZM2G105335 // GRMZM2G138349 // GRMZM5G878070 // GRMZM2G059102 // GRMZM2G157722 // GRMZM2G169654 // GRMZM2G381709 // AC233893.1_FG003 // GRMZM2G438293 // GRMZM2G099862 // GRMZM2G363437 // GRMZM2G107306 // GR…
GO:0034613	P	cellular protein localization	5	447	562	39203	0.77	1	// GRMZM2G060324 // GRMZM2G179789 // GRMZM2G014854 // GRMZM2G107205 // GRMZM2G168017
GO:0009308	P	amine metabolic process	13	447	994	39203	0.35	1	// GRMZM2G301553 // GRMZM2G008792 // GRMZM2G365160 // GRMZM2G069203 // GRMZM2G150248 // GRMZM2G437912 // GRMZM5G848696 // GRMZM5G821551 // GRMZM2G004590 // GRMZM2G142437 // GRMZM2G080380 // GRMZM2G073814 // GRMZM2G537291
GO:0009309	P	amine biosynthetic process	6	447	348	39203	0.21	1	// GRMZM2G365160 // GRMZM2G069203 // GRMZM2G437912 // GRMZM2G004590 // GRMZM2G073814 // GRMZM2G537291
GO:0006812	P	cation transport	14	447	924	39203	0.18	1	// GRMZM2G116517 // GRMZM2G177912 // GRMZM2G069229 // GRMZM5G862882 // GRMZM2G143512 // GRMZM2G080045 // GRMZM2G107306 // GRMZM2G111872 // GRMZM2G151406 // AC186166.3_FG008 // GRMZM2G049781 // GRMZM2G064467 // GRMZM2G028134 // GRMZM2G331417
GO:0006811	P	ion transport	16	447	1096	39203	0.19	1	// GRMZM2G381709 // GRMZM2G116517 // GRMZM2G177912 // GRMZM2G069229 // GRMZM5G862882 // GRMZM2G143512 // GRMZM2G080045 // GRMZM2G107306 // GRMZM2G080041 // GRMZM2G111872 // GRMZM2G151406 // AC186166.3_FG008 // GRMZM2G049781 // GRMZM2G064467 // GRMZM2G028134 // GRMZM2G331417
GO:0006810	P	transport	43	447	3841	39203	0.57	1	// GRMZM5G842695 // GRMZM2G177912 // GRMZM2G143512 // GRMZM2G158807 // GRMZM2G128454 // GRMZM2G119894 // GRMZM2G179789 // GRMZM2G434910 // GRMZM2G059106 // GRMZM2G331417 // GRMZM2G151406 // GRMZM2G381709 // GRMZM2G116517 // GRMZM2G168017 // GRMZM5G862882 // GRMZM2G083094 // GRMZM2G010765 // GRMZM2G107306 // GRMZM2G127338 // GRMZM5G827496 // GRMZM2G107205 // GRMZM2G078292 // GRMZM2G335419 // GRMZM…
GO:0009889	P	regulation of biosynthetic process	33	447	3393	39203	0.85	1	// GRMZM2G360541 // GRMZM2G037792 // GRMZM2G124524 // GRMZM2G177912 // GRMZM2G114998 // GRMZM2G172621 // GRMZM2G341027 // GRMZM2G041223 // GRMZM2G105335 // GRMZM2G059102 // GRMZM2G157722 // GRMZM2G135703 // GRMZM2G438293 // GRMZM2G099862 // GRMZM2G088427 // GRMZM2G169654 // GRMZM2G121115 // GRMZM2G021864 // GRMZM2G043813 // GRMZM2G099522 // GRMZM2G171365 // GRMZM2G073805 // GRMZM2G137532 // GRMZM…
GO:0050794	P	regulation of cellular process	46	447	4274	39203	0.68	1	// GRMZM2G360541 // GRMZM2G037792 // GRMZM2G124524 // GRMZM2G114998 // GRMZM2G172621 // GRMZM2G341027 // GRMZM2G041223 // GRMZM2G105335 // GRMZM2G138349 // GRMZM2G059102 // GRMZM2G157722 // GRMZM2G135703 // GRMZM2G438293 // GRMZM2G099862 // GRMZM2G363437 // GRMZM2G088427 // GRMZM2G169654 // GRMZM2G147780 // GRMZM2G121115 // GRMZM2G021864 // GRMZM2G436199 // GRMZM2G043813 // GRMZM2G074267 // GRMZM…
GO:0043412	P	macromolecule modification	41	447	3252	39203	0.28	1	// GRMZM2G139223 // GRMZM2G136313 // GRMZM2G057329 // AC235547.1_FG005 // GRMZM2G076544 // GRMZM2G070961 // GRMZM5G826194 // GRMZM2G179789 // GRMZM5G878070 // GRMZM2G179279 // GRMZM2G179662 // GRMZM2G049661 // GRMZM2G075104 // GRMZM2G180160 // GRMZM2G146490 // GRMZM2G121115 // GRMZM2G152919 // GRMZM2G383240 // GRMZM2G074262 // GRMZM2G158734 // GRMZM2G131998 // GRMZM2G080041 // GRMZM2G700291 // GR…
GO:0008152	P	metabolic process	233	447	20231	39203	0.43	1	// GRMZM2G301553 // GRMZM2G008792 // GRMZM2G139223 // GRMZM2G177912 // GRMZM2G132169 // GRMZM2G169927 // GRMZM5G825512 // GRMZM2G172621 // GRMZM2G083427 // GRMZM2G149257 // GRMZM2G070961 // GRMZM2G173926 // GRMZM2G091588 // GRMZM2G168304 // GRMZM2G007252 // GRMZM2G164912 // GRMZM2G048200 // GRMZM2G179662 // GRMZM2G311036 // GRMZM2G099862 // GRMZM2G057910 // GRMZM2G169654 // GRMZM2G069594 // GRMZM…
GO:0009266	P	response to temperature stimulus	17	447	1765	39203	0.79	1	// GRMZM2G094352 // GRMZM2G160506 // AC233893.1_FG003 // GRMZM2G018375 // GRMZM2G043147 // GRMZM2G024718 // GRMZM2G446253 // GRMZM2G412611 // GRMZM2G090568 // GRMZM2G066165 // GRMZM2G171365 // GRMZM2G052423 // GRMZM2G466833 // GRMZM2G300135 // GRMZM2G063676 // GRMZM2G059102 // GRMZM2G169927
GO:0051234	P	establishment of localization	43	447	3841	39203	0.57	1	// GRMZM5G842695 // GRMZM2G177912 // GRMZM2G143512 // GRMZM2G158807 // GRMZM2G128454 // GRMZM2G119894 // GRMZM2G179789 // GRMZM2G434910 // GRMZM2G059106 // GRMZM2G331417 // GRMZM2G151406 // GRMZM2G381709 // GRMZM2G116517 // GRMZM2G168017 // GRMZM5G862882 // GRMZM2G083094 // GRMZM2G010765 // GRMZM2G107306 // GRMZM2G127338 // GRMZM5G827496 // GRMZM2G107205 // GRMZM2G078292 // GRMZM2G335419 // GRMZM…
GO:0016070	P	RNA metabolic process	37	447	3121	39203	0.43	1	// GRMZM2G360541 // GRMZM2G301553 // GRMZM2G037792 // GRMZM2G124524 // GRMZM2G114998 // GRMZM2G172621 // GRMZM2G341027 // GRMZM2G041223 // GRMZM2G105335 // GRMZM2G130207 // GRMZM2G059102 // GRMZM2G157722 // GRMZM2G169654 // GRMZM2G438293 // GRMZM2G099862 // GRMZM2G088427 // GRMZM2G135703 // GRMZM5G821551 // GRMZM2G121115 // GRMZM2G021864 // GRMZM2G043813 // GRMZM2G099522 // GRMZM2G068471 // GRMZM…
GO:0008652	P	cellular amino acid biosynthetic process	6	447	324	39203	0.17	1	// GRMZM2G365160 // GRMZM2G069203 // GRMZM2G437912 // GRMZM2G004590 // GRMZM2G073814 // GRMZM2G537291
GO:0044271	P	cellular nitrogen compound biosynthetic process	9	447	549	39203	0.18	1	// GRMZM2G018375 // GRMZM2G365160 // GRMZM2G069203 // GRMZM2G437912 // GRMZM2G004590 // GRMZM2G004222 // GRMZM2G080380 // GRMZM2G073814 // GRMZM2G537291
GO:0046907	P	intracellular transport	6	447	661	39203	0.76	1	// GRMZM2G168017 // GRMZM2G014854 // GRMZM2G060324 // GRMZM2G107205 // GRMZM2G059106 // GRMZM2G179789
GO:0006355	P	regulation of transcription, DNA-dependent	31	447	2208	39203	0.14	1	// GRMZM2G360541 // GRMZM2G037792 // GRMZM2G124524 // GRMZM2G114998 // GRMZM2G172621 // GRMZM2G041223 // GRMZM2G105335 // GRMZM2G059102 // GRMZM2G157722 // GRMZM2G135703 // GRMZM2G438293 // GRMZM2G099862 // GRMZM2G088427 // GRMZM2G169654 // GRMZM2G121115 // GRMZM2G021864 // GRMZM2G043813 // GRMZM2G099522 // GRMZM2G171365 // GRMZM2G073805 // GRMZM2G137532 // GRMZM2G147716 // GRMZM2G094352 // GRMZM…
GO:0006350	P	transcription	32	447	3730	39203	0.97	1	// GRMZM2G360541 // GRMZM2G037792 // GRMZM2G124524 // GRMZM2G114998 // GRMZM2G172621 // GRMZM2G041223 // GRMZM2G105335 // GRMZM2G130207 // GRMZM2G059102 // GRMZM2G157722 // GRMZM2G135703 // GRMZM2G438293 // GRMZM2G099862 // GRMZM2G088427 // GRMZM2G169654 // GRMZM2G121115 // GRMZM2G021864 // GRMZM2G043813 // GRMZM2G099522 // GRMZM2G171365 // GRMZM2G073805 // GRMZM2G137532 // GRMZM2G147716 // GRMZM…
GO:0006351	P	transcription, DNA-dependent	32	447	2362	39203	0.18	1	// GRMZM2G360541 // GRMZM2G037792 // GRMZM2G124524 // GRMZM2G114998 // GRMZM2G172621 // GRMZM2G041223 // GRMZM2G105335 // GRMZM2G130207 // GRMZM2G059102 // GRMZM2G157722 // GRMZM2G135703 // GRMZM2G438293 // GRMZM2G099862 // GRMZM2G088427 // GRMZM2G169654 // GRMZM2G121115 // GRMZM2G021864 // GRMZM2G043813 // GRMZM2G099522 // GRMZM2G171365 // GRMZM2G073805 // GRMZM2G137532 // GRMZM2G147716 // GRMZM…
GO:0006753	P	nucleoside phosphate metabolic process	9	447	567	39203	0.21	1	// GRMZM2G069229 // GRMZM5G848696 // GRMZM5G874903 // GRMZM2G060324 // GRMZM2G046498 // GRMZM2G333183 // GRMZM2G172932 // GRMZM2G080380 // GRMZM2G173209
GO:0032774	P	RNA biosynthetic process	32	447	2364	39203	0.18	1	// GRMZM2G360541 // GRMZM2G037792 // GRMZM2G124524 // GRMZM2G114998 // GRMZM2G172621 // GRMZM2G041223 // GRMZM2G105335 // GRMZM2G130207 // GRMZM2G059102 // GRMZM2G157722 // GRMZM2G135703 // GRMZM2G438293 // GRMZM2G099862 // GRMZM2G088427 // GRMZM2G169654 // GRMZM2G121115 // GRMZM2G021864 // GRMZM2G043813 // GRMZM2G099522 // GRMZM2G171365 // GRMZM2G073805 // GRMZM2G137532 // GRMZM2G147716 // GRMZM…
GO:0070271	P	protein complex biogenesis	7	447	593	39203	0.52	1	// GRMZM2G360541 // GRMZM2G436226 // GRMZM2G112337 // GRMZM2G076544 // GRMZM2G087435 // GRMZM2G172932 // GRMZM2G335419
GO:0044249	P	cellular biosynthetic process	86	447	7619	39203	0.56	1	// GRMZM2G301553 // GRMZM2G177912 // GRMZM5G825512 // GRMZM2G172621 // GRMZM2G083427 // GRMZM2G149257 // GRMZM2G168304 // GRMZM2G164912 // GRMZM2G099862 // GRMZM2G169654 // GRMZM2G069594 // GRMZM2G162445 // GRMZM2G099522 // GRMZM2G437912 // GRMZM2G114998 // AC234157.1_FG002 // GRMZM2G137532 // GRMZM2G069203 // GRMZM2G104847 // GRMZM5G879536 // GRMZM2G024354 // GRMZM2G041223 // GRMZM2G124524 // GR…
GO:0034641	P	cellular nitrogen compound metabolic process	15	447	1150	39203	0.34	1	// GRMZM2G301553 // GRMZM2G018375 // GRMZM2G365160 // GRMZM5G848696 // GRMZM2G069203 // GRMZM2G150248 // GRMZM2G437912 // GRMZM5G874903 // GRMZM5G821551 // GRMZM2G004590 // GRMZM2G046498 // GRMZM2G080380 // GRMZM2G073814 // GRMZM2G537291 // GRMZM2G004222
GO:0009259	P	ribonucleotide metabolic process	5	447	405	39203	0.49	1	// GRMZM2G080380 // GRMZM2G060324 // GRMZM2G069229 // GRMZM2G333183 // GRMZM2G172932
GO:0006461	P	protein complex assembly	7	447	593	39203	0.52	1	// GRMZM2G360541 // GRMZM2G436226 // GRMZM2G112337 // GRMZM2G076544 // GRMZM2G087435 // GRMZM2G172932 // GRMZM2G335419
GO:0006139	P	nucleobase, nucleoside, nucleotide and nucleic acid metabolic process	53	447	5979	39203	0.98	1	// GRMZM2G360541 // GRMZM2G301553 // GRMZM2G037792 // GRMZM2G124524 // GRMZM5G825512 // GRMZM2G172621 // GRMZM5G848696 // GRMZM2G341027 // GRMZM2G105335 // GRMZM2G046498 // GRMZM2G041223 // GRMZM2G080380 // GRMZM2G130207 // GRMZM2G173209 // GRMZM2G059102 // GRMZM2G157722 // GRMZM2G135703 // GRMZM2G438293 // GRMZM2G090172 // GRMZM2G099862 // GRMZM2G114998 // GRMZM2G088427 // GRMZM5G874903 // GRMZM…
GO:0051179	P	localization	43	447	3887	39203	0.61	1	// GRMZM5G842695 // GRMZM2G177912 // GRMZM2G143512 // GRMZM2G158807 // GRMZM2G128454 // GRMZM2G119894 // GRMZM2G179789 // GRMZM2G434910 // GRMZM2G059106 // GRMZM2G331417 // GRMZM2G151406 // GRMZM2G381709 // GRMZM2G116517 // GRMZM2G168017 // GRMZM5G862882 // GRMZM2G083094 // GRMZM2G010765 // GRMZM2G107306 // GRMZM2G127338 // GRMZM5G827496 // GRMZM2G107205 // GRMZM2G078292 // GRMZM2G335419 // GRMZM…
GO:0046365	P	monosaccharide catabolic process	7	447	318	39203	0.077	1	// GRMZM2G124524 // GRMZM2G446253 // GRMZM5G848696 // GRMZM5G874903 // GRMZM5G856653 // GRMZM2G177947 // GRMZM2G046804
GO:0006508	P	proteolysis	20	447	1613	39203	0.38	1	// GRMZM2G123815 // GRMZM2G348873 // GRMZM5G803334 // GRMZM2G417770 // GRMZM2G463291 // GRMZM2G029641 // GRMZM2G075104 // GRMZM2G159171 // GRMZM2G144440 // GRMZM2G096764 // GRMZM2G112337 // GRMZM2G133249 // GRMZM2G049661 // GRMZM2G035636 // GRMZM2G123940 // GRMZM2G033671 // GRMZM2G013986 // GRMZM2G128268 // GRMZM2G132238 // GRMZM2G017804
GO:0051641	P	cellular localization	10	447	817	39203	0.46	1	// GRMZM2G168017 // GRMZM2G107306 // GRMZM2G014854 // GRMZM2G080041 // GRMZM2G060324 // GRMZM2G177227 // GRMZM2G107205 // GRMZM2G128454 // GRMZM2G179789 // GRMZM2G059106
GO:0032501	P	multicellular organismal process	25	447	1983	39203	0.33	1	// AC233893.1_FG003 // GRMZM2G070961 // GRMZM2G005298 // GRMZM2G059102 // GRMZM2G150030 // GRMZM2G141214 // GRMZM2G179662 // GRMZM2G308034 // GRMZM2G171365 // GRMZM2G049661 // GRMZM2G147780 // GRMZM2G179147 // GRMZM2G458159 // GRMZM2G074267 // GRMZM2G099522 // GRMZM2G074262 // GRMZM2G456471 // GRMZM2G169927 // GRMZM2G147716 // GRMZM2G098037 // GRMZM2G118250 // GRMZM2G104847 // GRMZM5G879536 // GR…
GO:0044238	P	primary metabolic process	172	447	15885	39203	0.82	1	// GRMZM2G301553 // GRMZM2G139223 // GRMZM2G177912 // GRMZM2G132169 // GRMZM2G466833 // GRMZM5G825512 // GRMZM2G172621 // GRMZM2G083427 // GRMZM2G149257 // GRMZM2G070961 // GRMZM2G168304 // GRMZM2G007252 // GRMZM2G164912 // GRMZM2G179662 // GRMZM2G146490 // GRMZM2G099862 // GRMZM2G169654 // GRMZM2G069594 // GRMZM2G162445 // GRMZM2G002531 // GRMZM2G112337 // GRMZM2G076049 // GRMZM2G099522 // GRMZM…
GO:0043687	P	post-translational protein modification	37	447	2929	39203	0.28	1	// GRMZM2G139223 // GRMZM2G136313 // GRMZM2G057329 // AC235547.1_FG005 // GRMZM2G076544 // GRMZM2G070961 // GRMZM2G179789 // GRMZM5G878070 // GRMZM2G179279 // GRMZM2G179662 // GRMZM2G075104 // GRMZM2G180160 // GRMZM2G049661 // GRMZM2G121115 // GRMZM2G152919 // GRMZM2G383240 // GRMZM2G074262 // GRMZM2G158734 // GRMZM2G080041 // GRMZM2G700291 // GRMZM2G418689 // GRMZM2G155753 // GRMZM2G436226 // GR…
GO:0009987	P	cellular process	211	447	18476	39203	0.51	1	// GRMZM2G301553 // GRMZM2G008792 // GRMZM2G139223 // GRMZM2G177912 // GRMZM2G132169 // GRMZM5G825512 // GRMZM2G172621 // GRMZM2G083427 // GRMZM2G149257 // GRMZM2G070961 // GRMZM2G138349 // GRMZM2G090172 // GRMZM2G168304 // GRMZM2G331417 // GRMZM2G157722 // GRMZM2G052423 // GRMZM2G164912 // GRMZM2G047813 // GRMZM2G179662 // GRMZM2G311036 // GRMZM2G099862 // GRMZM2G010765 // GRMZM2G107306 // GRMZM…
GO:0034637	P	cellular carbohydrate biosynthetic process	5	447	285	39203	0.23	1	// GRMZM2G160506 // GRMZM2G164912 // GRMZM2G456471 // GRMZM2G104092 // GRMZM2G088753
GO:0034645	P	cellular macromolecule biosynthetic process	60	447	6057	39203	0.9	1	// GRMZM2G360541 // GRMZM2G301553 // GRMZM2G125976 // GRMZM2G124524 // GRMZM5G825512 // GRMZM2G172621 // GRMZM2G341027 // GRMZM2G041223 // GRMZM2G149257 // GRMZM2G105335 // GRMZM2G130207 // GRMZM2G059102 // GRMZM2G157722 // GRMZM2G169654 // GRMZM2G164912 // GRMZM2G140116 // GRMZM2G438293 // GRMZM2G099862 // GRMZM2G114998 // GRMZM2G088427 // GRMZM2G135703 // GRMZM2G142437 // GRMZM2G121115 // GRMZM…
GO:0023046	P	signaling process	10	447	783	39203	0.4	1	// GRMZM2G094352 // GRMZM2G064371 // GRMZM2G141214 // GRMZM2G074267 // GRMZM2G383240 // GRMZM2G138349 // GRMZM2G456644 // GRMZM2G048455 // GRMZM2G059102 // GRMZM2G108991
GO:0030001	P	metal ion transport	9	447	616	39203	0.28	1	// GRMZM2G116517 // GRMZM2G143512 // GRMZM2G107306 // GRMZM2G111872 // GRMZM2G151406 // AC186166.3_FG008 // GRMZM2G049781 // GRMZM2G064467 // GRMZM2G028134
GO:0006955	P	immune response	5	447	360	39203	0.39	1	// GRMZM2G094352 // GRMZM2G021864 // GRMZM2G346861 // GRMZM2G163998 // GRMZM2G158734
GO:0009409	P	response to cold	12	447	1758	39203	0.98	1	// GRMZM2G094352 // AC233893.1_FG003 // GRMZM2G018375 // GRMZM2G412611 // GRMZM2G446253 // GRMZM2G090568 // GRMZM2G171365 // GRMZM2G052423 // GRMZM2G169927 // GRMZM2G300135 // GRMZM2G066165 // GRMZM2G466833
GO:0055085	P	transmembrane transport	19	447	1420	39203	0.27	1	// GRMZM5G842695 // GRMZM2G086730 // GRMZM2G177912 // GRMZM2G069229 // GRMZM5G862882 // GRMZM2G083094 // GRMZM2G010765 // GRMZM2G074267 // GRMZM2G107306 // GRMZM2G080041 // GRMZM2G166976 // GRMZM2G333183 // GRMZM2G078292 // GRMZM2G064467 // GRMZM2G119894 // GRMZM2G018417 // GRMZM2G434910 // GRMZM2G331417 // GRMZM2G084389
GO:0055086	P	nucleobase, nucleoside and nucleotide metabolic process	10	447	619	39203	0.18	1	// GRMZM5G848696 // GRMZM2G069229 // GRMZM2G131998 // GRMZM5G874903 // GRMZM2G060324 // GRMZM2G046498 // GRMZM2G333183 // GRMZM2G172932 // GRMZM2G080380 // GRMZM2G173209
GO:0007242	P	intracellular signaling cascade	7	447	455	39203	0.27	1	// GRMZM2G094352 // GRMZM2G064371 // GRMZM2G074267 // GRMZM2G138349 // GRMZM2G456644 // GRMZM2G048455 // GRMZM2G059102
GO:0051252	P	regulation of RNA metabolic process	31	447	2211	39203	0.14	1	// GRMZM2G360541 // GRMZM2G037792 // GRMZM2G124524 // GRMZM2G114998 // GRMZM2G172621 // GRMZM2G041223 // GRMZM2G105335 // GRMZM2G059102 // GRMZM2G157722 // GRMZM2G135703 // GRMZM2G438293 // GRMZM2G099862 // GRMZM2G088427 // GRMZM2G169654 // GRMZM2G121115 // GRMZM2G021864 // GRMZM2G043813 // GRMZM2G099522 // GRMZM2G171365 // GRMZM2G073805 // GRMZM2G137532 // GRMZM2G147716 // GRMZM2G094352 // GRMZM…
GO:0043170	P	macromolecule metabolic process	128	447	12696	39203	0.96	1	// GRMZM2G301553 // GRMZM2G139223 // GRMZM5G825512 // GRMZM2G172621 // GRMZM2G149257 // GRMZM2G070961 // GRMZM2G164912 // GRMZM2G179662 // GRMZM2G049661 // GRMZM2G099862 // GRMZM2G169654 // GRMZM2G069594 // GRMZM2G162445 // GRMZM2G094352 // GRMZM2G112337 // GRMZM2G099522 // GRMZM2G068471 // GRMZM2G158734 // GRMZM2G114998 // AC234157.1_FG002 // GRMZM2G137532 // GRMZM2G098037 // GRMZM2G010775 // GR…
GO:0006006	P	glucose metabolic process	8	447	418	39203	0.11	1	// GRMZM2G088753 // GRMZM2G124524 // GRMZM2G446253 // GRMZM5G848696 // GRMZM5G874903 // GRMZM5G856653 // GRMZM2G177947 // GRMZM2G046804
GO:0006007	P	glucose catabolic process	7	447	318	39203	0.077	1	// GRMZM2G124524 // GRMZM2G446253 // GRMZM5G848696 // GRMZM5G874903 // GRMZM5G856653 // GRMZM2G177947 // GRMZM2G046804
GO:0044106	P	cellular amine metabolic process	11	447	898	39203	0.45	1	// GRMZM2G301553 // GRMZM2G365160 // GRMZM2G069203 // GRMZM2G150248 // GRMZM2G437912 // GRMZM5G848696 // GRMZM5G821551 // GRMZM2G004590 // GRMZM2G080380 // GRMZM2G073814 // GRMZM2G537291
GO:0043933	P	macromolecular complex subunit organization	11	447	929	39203	0.49	1	// GRMZM2G360541 // GRMZM2G099657 // GRMZM2G047813 // GRMZM2G436226 // GRMZM2G087435 // GRMZM2G076544 // GRMZM2G341027 // GRMZM2G112337 // GRMZM2G181153 // GRMZM2G172932 // GRMZM2G335419
GO:0031326	P	regulation of cellular biosynthetic process	32	447	3393	39203	0.89	1	// GRMZM2G360541 // GRMZM2G037792 // GRMZM2G124524 // GRMZM2G114998 // GRMZM2G172621 // GRMZM2G341027 // GRMZM2G041223 // GRMZM2G105335 // GRMZM2G059102 // GRMZM2G157722 // GRMZM2G135703 // GRMZM2G438293 // GRMZM2G099862 // GRMZM2G088427 // GRMZM2G169654 // GRMZM2G121115 // GRMZM2G021864 // GRMZM2G043813 // GRMZM2G099522 // GRMZM2G171365 // GRMZM2G073805 // GRMZM2G137532 // GRMZM2G147716 // GRMZM…
GO:0031323	P	regulation of cellular metabolic process	34	447	3439	39203	0.83	1	// GRMZM2G360541 // GRMZM2G037792 // GRMZM2G124524 // GRMZM2G114998 // GRMZM2G172621 // GRMZM2G341027 // GRMZM2G041223 // GRMZM2G105335 // GRMZM2G059102 // GRMZM2G157722 // GRMZM2G135703 // GRMZM2G438293 // GRMZM2G099862 // GRMZM2G363437 // GRMZM2G088427 // GRMZM2G169654 // GRMZM2G121115 // GRMZM2G021864 // GRMZM2G043813 // GRMZM2G099522 // GRMZM2G171365 // GRMZM2G073805 // GRMZM2G137532 // GRMZM…
GO:0042592	P	homeostatic process	5	447	2047	39203	1	1	// GRMZM2G178190 // GRMZM2G381709 // GRMZM2G107306 // GRMZM2G436199 // GRMZM2G073774
GO:0045449	P	regulation of transcription	31	447	3352	39203	0.91	1	// GRMZM2G360541 // GRMZM2G037792 // GRMZM2G124524 // GRMZM2G114998 // GRMZM2G172621 // GRMZM2G041223 // GRMZM2G105335 // GRMZM2G059102 // GRMZM2G157722 // GRMZM2G135703 // GRMZM2G438293 // GRMZM2G099862 // GRMZM2G088427 // GRMZM2G169654 // GRMZM2G121115 // GRMZM2G021864 // GRMZM2G043813 // GRMZM2G099522 // GRMZM2G171365 // GRMZM2G073805 // GRMZM2G137532 // GRMZM2G147716 // GRMZM2G094352 // GRMZM…
GO:0015031	P	protein transport	7	447	864	39203	0.86	1	// GRMZM2G168017 // GRMZM2G014854 // GRMZM2G060324 // GRMZM2G107205 // GRMZM2G128454 // GRMZM2G059106 // GRMZM2G179789
GO:0034622	P	cellular macromolecular complex assembly	10	447	553	39203	0.11	1	// GRMZM2G360541 // GRMZM2G099657 // GRMZM2G047813 // GRMZM2G087435 // GRMZM2G076544 // GRMZM2G341027 // GRMZM2G112337 // GRMZM2G181153 // GRMZM2G172932 // GRMZM2G335419
GO:0023052	P	signaling	17	447	1673	39203	0.72	1	// GRMZM2G094352 // GRMZM2G064371 // GRMZM2G141214 // GRMZM2G381709 // GRMZM2G001660 // GRMZM2G098037 // GRMZM2G074267 // GRMZM2G090568 // GRMZM2G383240 // GRMZM2G052423 // GRMZM2G418689 // GRMZM2G080380 // GRMZM2G138349 // GRMZM2G456644 // GRMZM2G048455 // GRMZM2G059102 // GRMZM2G108991
GO:0006325	P	chromatin organization	5	447	436	39203	0.56	1	// GRMZM2G047813 // GRMZM2G436226 // GRMZM2G121115 // GRMZM2G181153 // GRMZM2G021044
GO:0044265	P	cellular macromolecule catabolic process	11	447	653	39203	0.13	1	// GRMZM2G124524 // GRMZM2G412611 // GRMZM2G075104 // GRMZM2G446253 // GRMZM5G848696 // GRMZM5G874903 // GRMZM2G341027 // GRMZM2G049661 // GRMZM5G856653 // GRMZM2G177947 // GRMZM2G046804
GO:0006520	P	cellular amino acid metabolic process	10	447	849	39203	0.5	1	// GRMZM2G301553 // GRMZM2G365160 // GRMZM2G069203 // GRMZM2G437912 // GRMZM5G848696 // GRMZM5G821551 // GRMZM2G004590 // GRMZM2G080380 // GRMZM2G073814 // GRMZM2G537291
GO:0006096	P	glycolysis	5	447	262	39203	0.18	1	// GRMZM2G177947 // GRMZM2G046804 // GRMZM2G446253 // GRMZM2G124524 // GRMZM5G856653
GO:0010467	P	gene expression	55	447	6042	39203	0.97	1	// GRMZM2G360541 // GRMZM2G301553 // GRMZM2G037792 // GRMZM2G124524 // GRMZM2G114998 // GRMZM2G172621 // GRMZM2G341027 // GRMZM2G041223 // GRMZM2G149257 // GRMZM2G105335 // GRMZM2G130207 // GRMZM5G878070 // GRMZM2G059102 // GRMZM2G157722 // GRMZM2G135703 // GRMZM2G140116 // GRMZM2G438293 // GRMZM2G099862 // GRMZM2G088427 // GRMZM2G169654 // GRMZM2G146490 // GRMZM2G121115 // GRMZM2G069594 // GRMZM…
GO:0010556	P	regulation of macromolecule biosynthetic process	32	447	3393	39203	0.89	1	// GRMZM2G360541 // GRMZM2G037792 // GRMZM2G124524 // GRMZM2G114998 // GRMZM2G172621 // GRMZM2G341027 // GRMZM2G041223 // GRMZM2G105335 // GRMZM2G059102 // GRMZM2G157722 // GRMZM2G135703 // GRMZM2G438293 // GRMZM2G099862 // GRMZM2G088427 // GRMZM2G169654 // GRMZM2G121115 // GRMZM2G021864 // GRMZM2G043813 // GRMZM2G099522 // GRMZM2G171365 // GRMZM2G073805 // GRMZM2G137532 // GRMZM2G147716 // GRMZM…
GO:0010468	P	regulation of gene expression	35	447	3419	39203	0.77	1	// GRMZM2G360541 // GRMZM2G037792 // GRMZM2G124524 // GRMZM2G114998 // GRMZM2G172621 // GRMZM2G341027 // GRMZM2G041223 // GRMZM2G105335 // GRMZM5G878070 // GRMZM2G059102 // GRMZM2G157722 // GRMZM2G135703 // GRMZM2G438293 // GRMZM2G099862 // GRMZM2G088427 // GRMZM2G169654 // GRMZM2G146490 // GRMZM2G121115 // GRMZM2G021864 // GRMZM2G043813 // GRMZM2G099522 // GRMZM2G171365 // GRMZM2G073805 // GRMZM…
GO:0006468	P	protein amino acid phosphorylation	22	447	2387	39203	0.87	1	// GRMZM2G139223 // AC235547.1_FG005 // GRMZM2G070961 // GRMZM2G179789 // GRMZM5G878070 // GRMZM2G179279 // GRMZM2G179662 // GRMZM2G180160 // GRMZM2G383240 // GRMZM2G074262 // GRMZM2G080041 // GRMZM2G700291 // GRMZM2G418689 // GRMZM2G002531 // GRMZM2G162781 // GRMZM2G098037 // GRMZM5G871520 // GRMZM2G071573 // GRMZM2G177445 // GRMZM2G350918 // GRMZM2G048455 // GRMZM2G165428
GO:0046164	P	alcohol catabolic process	7	447	332	39203	0.091	1	// GRMZM2G124524 // GRMZM2G446253 // GRMZM5G848696 // GRMZM5G874903 // GRMZM5G856653 // GRMZM2G177947 // GRMZM2G046804
GO:0044267	P	cellular protein metabolic process	59	447	5860	39203	0.86	1	// GRMZM2G301553 // GRMZM2G139223 // GRMZM2G136313 // GRMZM2G057329 // GRMZM2G348873 // AC235547.1_FG005 // GRMZM2G076544 // GRMZM2G341027 // GRMZM2G155753 // GRMZM2G099657 // GRMZM2G149257 // GRMZM2G070961 // GRMZM5G826194 // GRMZM2G179789 // GRMZM5G878070 // GRMZM2G179279 // GRMZM5G821551 // GRMZM2G140116 // GRMZM2G179662 // GRMZM2G075104 // GRMZM2G180160 // GRMZM2G411764 // GRMZM2G049661 // GR…
GO:0019219	P	regulation of nucleobase, nucleoside, nucleotide and nucleic acid metabolic process	31	447	3370	39203	0.91	1	// GRMZM2G360541 // GRMZM2G037792 // GRMZM2G124524 // GRMZM2G114998 // GRMZM2G172621 // GRMZM2G041223 // GRMZM2G105335 // GRMZM2G059102 // GRMZM2G157722 // GRMZM2G135703 // GRMZM2G438293 // GRMZM2G099862 // GRMZM2G088427 // GRMZM2G169654 // GRMZM2G121115 // GRMZM2G021864 // GRMZM2G043813 // GRMZM2G099522 // GRMZM2G171365 // GRMZM2G073805 // GRMZM2G137532 // GRMZM2G147716 // GRMZM2G094352 // GRMZM…
GO:0000271	P	polysaccharide biosynthetic process	5	447	201	39203	0.085	1	// GRMZM2G160506 // GRMZM2G164912 // GRMZM2G142437 // GRMZM2G104092 // GRMZM2G088753
GO:0006464	P	protein modification process	39	447	3113	39203	0.29	1	// GRMZM2G139223 // GRMZM2G136313 // GRMZM2G057329 // AC235547.1_FG005 // GRMZM2G076544 // GRMZM2G070961 // GRMZM5G826194 // GRMZM2G179789 // GRMZM5G878070 // GRMZM2G179279 // GRMZM2G179662 // GRMZM2G075104 // GRMZM2G180160 // GRMZM2G049661 // GRMZM2G121115 // GRMZM2G152919 // GRMZM2G383240 // GRMZM2G074262 // GRMZM2G158734 // GRMZM2G080041 // GRMZM2G700291 // GRMZM2G418689 // GRMZM2G155753 // GR…
GO:0023060	P	signal transmission	10	447	783	39203	0.4	1	// GRMZM2G094352 // GRMZM2G064371 // GRMZM2G141214 // GRMZM2G074267 // GRMZM2G383240 // GRMZM2G138349 // GRMZM2G456644 // GRMZM2G048455 // GRMZM2G059102 // GRMZM2G108991
GO:0009058	P	biosynthetic process	89	447	7998	39203	0.62	1	// GRMZM2G301553 // GRMZM2G177912 // GRMZM5G825512 // GRMZM2G172621 // GRMZM2G083427 // GRMZM2G149257 // GRMZM2G168304 // GRMZM2G007252 // GRMZM2G164912 // GRMZM2G099862 // GRMZM2G171365 // GRMZM2G069594 // GRMZM2G162445 // GRMZM2G099522 // GRMZM2G437912 // GRMZM2G114998 // AC234157.1_FG002 // GRMZM2G137532 // GRMZM2G069203 // GRMZM2G104847 // GRMZM5G879536 // GRMZM2G024354 // GRMZM2G041223 // GR…
GO:0009059	P	macromolecule biosynthetic process	60	447	6064	39203	0.9	1	// GRMZM2G360541 // GRMZM2G301553 // GRMZM2G125976 // GRMZM2G124524 // GRMZM5G825512 // GRMZM2G172621 // GRMZM2G341027 // GRMZM2G041223 // GRMZM2G149257 // GRMZM2G105335 // GRMZM2G130207 // GRMZM2G059102 // GRMZM2G157722 // GRMZM2G169654 // GRMZM2G164912 // GRMZM2G140116 // GRMZM2G438293 // GRMZM2G099862 // GRMZM2G114998 // GRMZM2G088427 // GRMZM2G135703 // GRMZM2G142437 // GRMZM2G121115 // GRMZM…
GO:0009117	P	nucleotide metabolic process	9	447	567	39203	0.21	1	// GRMZM2G069229 // GRMZM5G848696 // GRMZM5G874903 // GRMZM2G060324 // GRMZM2G046498 // GRMZM2G333183 // GRMZM2G172932 // GRMZM2G080380 // GRMZM2G173209
GO:0051171	P	regulation of nitrogen compound metabolic process	31	447	3370	39203	0.91	1	// GRMZM2G360541 // GRMZM2G037792 // GRMZM2G124524 // GRMZM2G114998 // GRMZM2G172621 // GRMZM2G041223 // GRMZM2G105335 // GRMZM2G059102 // GRMZM2G157722 // GRMZM2G135703 // GRMZM2G438293 // GRMZM2G099862 // GRMZM2G088427 // GRMZM2G169654 // GRMZM2G121115 // GRMZM2G021864 // GRMZM2G043813 // GRMZM2G099522 // GRMZM2G171365 // GRMZM2G073805 // GRMZM2G137532 // GRMZM2G147716 // GRMZM2G094352 // GRMZM…
GO:0051649	P	establishment of localization in cell	8	447	791	39203	0.68	1	// GRMZM2G168017 // GRMZM2G014854 // GRMZM2G060324 // GRMZM2G177227 // GRMZM2G107205 // GRMZM2G128454 // GRMZM2G059106 // GRMZM2G179789
GO:0009057	P	macromolecule catabolic process	13	447	776	39203	0.11	1	// GRMZM2G046804 // GRMZM2G124524 // GRMZM5G848696 // GRMZM2G412611 // GRMZM2G075104 // GRMZM2G446253 // GRMZM2G096764 // GRMZM5G874903 // GRMZM2G341027 // GRMZM2G049661 // GRMZM5G856653 // GRMZM2G177947 // GRMZM2G175218
GO:0006996	P	organelle organization	12	447	657	39203	0.079	1	// GRMZM2G003769 // GRMZM2G099657 // GRMZM2G181153 // GRMZM2G047813 // GRMZM2G100714 // GRMZM2G436226 // GRMZM2G021044 // GRMZM2G112337 // GRMZM2G074262 // GRMZM2G121115 // GRMZM2G086779 // GRMZM2G335419
GO:0005975	P	carbohydrate metabolic process	27	447	1828	39203	0.11	1	// GRMZM2G124524 // GRMZM2G177912 // GRMZM2G446253 // GRMZM5G848696 // GRMZM2G174598 // GRMZM2G005298 // GRMZM2G046804 // GRMZM2G164912 // GRMZM2G412611 // GRMZM5G874903 // GRMZM2G021846 // GRMZM2G142437 // GRMZM5G856653 // GRMZM2G177947 // GRMZM2G042179 // GRMZM2G069024 // GRMZM2G076049 // GRMZM2G104092 // GRMZM2G456471 // GRMZM2G466833 // GRMZM2G153274 // GRMZM2G160506 // GRMZM2G088753 // GRMZM…
GO:0051276	P	chromosome organization	5	447	446	39203	0.58	1	// GRMZM2G047813 // GRMZM2G436226 // GRMZM2G121115 // GRMZM2G181153 // GRMZM2G021044
GO:0005976	P	polysaccharide metabolic process	7	447	328	39203	0.087	1	// GRMZM2G160506 // GRMZM2G164912 // GRMZM2G088753 // GRMZM2G412611 // GRMZM2G104092 // GRMZM2G142437 // GRMZM2G175218
GO:0044237	P	cellular metabolic process	167	447	14490	39203	0.45	1	// GRMZM2G301553 // GRMZM2G008792 // GRMZM2G139223 // GRMZM2G177912 // GRMZM2G132169 // GRMZM2G466833 // GRMZM5G825512 // GRMZM2G172621 // GRMZM2G083427 // GRMZM2G149257 // GRMZM2G070961 // GRMZM2G168304 // GRMZM2G164912 // GRMZM2G179662 // GRMZM2G311036 // GRMZM2G099862 // GRMZM2G169654 // GRMZM2G069594 // GRMZM2G162445 // GRMZM2G002531 // GRMZM2G099522 // GRMZM2G437912 // GRMZM2G158734 // GRMZM…
GO:0006066	P	alcohol metabolic process	11	447	729	39203	0.22	1	// GRMZM2G088753 // GRMZM2G124524 // GRMZM2G021846 // GRMZM2G446253 // GRMZM5G848696 // GRMZM5G874903 // GRMZM2G456471 // GRMZM5G856653 // GRMZM2G177947 // GRMZM2G046804 // GRMZM2G153274
GO:0006796	P	phosphate metabolic process	36	447	2994	39203	0.4	1	// GRMZM2G139223 // AC235547.1_FG005 // GRMZM2G090718 // GRMZM2G070961 // GRMZM2G179789 // GRMZM5G878070 // GRMZM2G173209 // GRMZM2G179279 // GRMZM2G179662 // GRMZM2G157267 // GRMZM2G363437 // GRMZM2G180160 // GRMZM2G412611 // GRMZM2G177947 // GRMZM2G142776 // GRMZM2G021846 // GRMZM2G383240 // GRMZM2G074262 // GRMZM2G158734 // GRMZM2G004590 // GRMZM2G080041 // GRMZM2G700291 // GRMZM2G418689 // GR…
GO:0044085	P	cellular component biogenesis	13	447	1037	39203	0.41	1	// GRMZM2G360541 // GRMZM2G099657 // GRMZM2G047813 // GRMZM2G436226 // GRMZM2G068471 // GRMZM2G087435 // GRMZM2G076544 // GRMZM2G341027 // GRMZM2G142437 // GRMZM2G112337 // GRMZM2G181153 // GRMZM2G172932 // GRMZM2G335419
GO:0006793	P	phosphorus metabolic process	36	447	2995	39203	0.4	1	// GRMZM2G139223 // AC235547.1_FG005 // GRMZM2G090718 // GRMZM2G070961 // GRMZM2G179789 // GRMZM5G878070 // GRMZM2G173209 // GRMZM2G179279 // GRMZM2G179662 // GRMZM2G157267 // GRMZM2G363437 // GRMZM2G180160 // GRMZM2G412611 // GRMZM2G177947 // GRMZM2G142776 // GRMZM2G021846 // GRMZM2G383240 // GRMZM2G074262 // GRMZM2G158734 // GRMZM2G004590 // GRMZM2G080041 // GRMZM2G700291 // GRMZM2G418689 // GR…
GO:0006259	P	DNA metabolic process	7	447	828	39203	0.83	1	// GRMZM2G090172 // GRMZM2G098714 // GRMZM5G825512 // GRMZM2G146490 // GRMZM5G879536 // GRMZM2G436226 // GRMZM2G162445
GO:0006412	P	translation	18	447	1871	39203	0.8	1	// GRMZM2G301553 // GRMZM5G821551 // GRMZM2G099657 // GRMZM2G140116 // GRMZM2G130358 // GRMZM2G341027 // GRMZM2G122290 // GRMZM2G411764 // GRMZM2G010599 // GRMZM2G149257 // GRMZM2G119691 // GRMZM2G177098 // GRMZM2G069594 // GRMZM2G084465 // GRMZM2G132623 // AC234157.1_FG002 // GRMZM2G024354 // GRMZM2G019325
GO:0005515	F	protein binding	92	447	4766	39203	3.7e-07	0.00018	// GRMZM2G008060 // GRMZM2G047813 // GRMZM2G072518 // GRMZM2G181153 // GRMZM2G138349 // GRMZM2G113089 // GRMZM2G118825 // GRMZM2G179662 // GRMZM2G311036 // GRMZM2G099862 // GRMZM2G171365 // GRMZM2G129973 // GRMZM2G092363 // GRMZM2G099522 // GRMZM2G471142 // GRMZM2G003769 // GRMZM2G574887 // GRMZM2G475305 // GRMZM2G118037 // GRMZM2G112954 // GRMZM2G061492 // GRMZM5G879536 // GRMZM2G021406 // GRMZM…
GO:0016746	F	transferase activity, transferring acyl groups	18	447	437	39203	5.3e-06	0.00084	// GRMZM2G156816 // GRMZM2G137694 // GRMZM2G154216 // AC233893.1_FG003 // GRMZM2G069203 // GRMZM2G036534 // GRMZM2G030436 // GRMZM2G131618 // GRMZM2G039251 // GRMZM2G083427 // GRMZM2G352601 // GRMZM2G032095 // GRMZM2G121115 // GRMZM2G333775 // GRMZM2G042356 // GRMZM2G168304 // GRMZM2G537291 // GRMZM2G362298
GO:0003682	F	chromatin binding	7	447	50	39203	3.6e-06	0.00084	// GRMZM2G032655 // GRMZM2G010920 // GRMZM2G139284 // GRMZM2G045748 // GRMZM5G870592 // GRMZM2G002128 // GRMZM2G308034
GO:0016747	F	transferase activity, transferring acyl groups other than amino-acyl groups	15	447	357	39203	2.6e-05	0.0031	// GRMZM2G156816 // GRMZM2G137694 // GRMZM2G154216 // AC233893.1_FG003 // GRMZM2G069203 // GRMZM2G030436 // GRMZM2G131618 // GRMZM2G083427 // GRMZM2G352601 // GRMZM2G032095 // GRMZM2G121115 // GRMZM2G333775 // GRMZM2G042356 // GRMZM2G168304 // GRMZM2G362298
GO:0005507	F	copper ion binding	10	447	194	39203	0.00012	0.011	// GRMZM2G039251 // GRMZM2G116517 // GRMZM2G132169 // GRMZM2G079477 // GRMZM2G446253 // GRMZM2G116632 // GRMZM2G466833 // GRMZM2G143512 // GRMZM2G173209 // GRMZM2G141376
GO:0042802	F	identical protein binding	6	447	79	39203	0.00041	0.032	// GRMZM2G003769 // GRMZM2G013986 // GRMZM2G118037 // GRMZM2G018375 // GRMZM2G021406 // GRMZM2G059102
GO:0016705	F	oxidoreductase activity, acting on paired donors, with incorporation or reduction of molecular oxygen	8	447	180	39203	0.0014	0.095	// GRMZM2G062151 // GRMZM2G067225 // GRMZM2G341460 // GRMZM2G004222 // GRMZM2G179147 // GRMZM2G170047 // GRMZM2G091588 // GRMZM2G013448
GO:0004842	F	ubiquitin-protein ligase activity	6	447	141	39203	0.0066	0.39	// GRMZM2G062499 // GRMZM2G075104 // GRMZM2G049661 // GRMZM2G136313 // GRMZM2G152919 // GRMZM2G073310
GO:0016758	F	transferase activity, transferring hexosyl groups	13	447	542	39203	0.011	0.59	// GRMZM2G060993 // GRMZM2G164912 // GRMZM2G088753 // GRMZM2G047910 // GRMZM2G096231 // GRMZM2G104092 // GRMZM5G892627 // GRMZM2G173926 // GRMZM2G029587 // GRMZM2G179063 // GRMZM2G395508 // GRMZM2G024131 // GRMZM2G164283
GO:0016757	F	transferase activity, transferring glycosyl groups	16	447	747	39203	0.014	0.66	// GRMZM2G060993 // GRMZM2G164912 // GRMZM2G088753 // GRMZM2G047910 // GRMZM2G096231 // GRMZM2G104092 // GRMZM5G892627 // GRMZM2G173926 // GRMZM2G029587 // GRMZM2G179063 // GRMZM2G412986 // GRMZM2G316534 // GRMZM2G476699 // GRMZM2G395508 // GRMZM2G024131 // GRMZM2G164283
GO:0016740	F	transferase activity	82	447	5727	39203	0.018	0.77	// GRMZM2G156816 // GRMZM2G139223 // GRMZM2G365160 // GRMZM2G096247 // AC233893.1_FG003 // GRMZM2G047910 // GRMZM2G096231 // GRMZM2G030436 // AC235547.1_FG005 // GRMZM2G131618 // GRMZM2G083427 // GRMZM2G046498 // GRMZM2G070961 // GRMZM2G080380 // GRMZM2G179789 // GRMZM2G137694 // GRMZM5G878070 // GRMZM2G168304 // GRMZM2G179279 // GRMZM2G362298 // GRMZM2G164912 // GRMZM2G175134 // GRMZM2G179662 //…
GO:0008415	F	acyltransferase activity	6	447	187	39203	0.023	0.9	// AC233893.1_FG003 // GRMZM2G069203 // GRMZM2G131618 // GRMZM2G083427 // GRMZM2G121115 // GRMZM2G333775
GO:0004252	F	serine-type endopeptidase activity	5	447	293	39203	0.25	1	// GRMZM2G348873 // GRMZM2G013986 // GRMZM2G118037 // GRMZM5G803334 // GRMZM2G017804
GO:0043169	F	cation binding	71	447	6664	39203	0.75	1	// GRMZM2G064371 // GRMZM2G103169 // GRMZM2G067225 // GRMZM5G868679 // GRMZM2G132169 // GRMZM2G143512 // GRMZM2G375153 // GRMZM2G172621 // GRMZM2G090718 // GRMZM2G177947 // GRMZM2G359589 // GRMZM2G004211 // GRMZM2G138349 // GRMZM2G117412 // GRMZM2G091588 // GRMZM2G173209 // GRMZM2G038519 // GRMZM2G151406 // GRMZM2G133249 // GRMZM2G062151 // GRMZM2G116517 // GRMZM2G079477 // GRMZM2G063220 // GRMZM…
GO:0070011	F	peptidase activity, acting on L-amino acid peptides	19	447	1493	39203	0.35	1	// GRMZM2G123815 // GRMZM2G118037 // GRMZM2G417770 // GRMZM2G463291 // GRMZM2G029641 // GRMZM2G128268 // GRMZM2G159171 // GRMZM2G144440 // GRMZM2G096764 // GRMZM2G112337 // GRMZM2G133249 // GRMZM2G348873 // GRMZM2G035636 // GRMZM2G123940 // GRMZM2G033671 // GRMZM2G013986 // GRMZM5G803334 // GRMZM2G132238 // GRMZM2G017804
GO:0008236	F	serine-type peptidase activity	8	447	511	39203	0.23	1	// GRMZM2G123815 // GRMZM2G348873 // GRMZM2G029641 // GRMZM2G118037 // GRMZM2G123940 // GRMZM2G013986 // GRMZM5G803334 // GRMZM2G017804
GO:0005198	F	structural molecule activity	16	447	2019	39203	0.95	1	// GRMZM2G360541 // GRMZM2G099657 // GRMZM2G140116 // GRMZM2G130358 // GRMZM2G122290 // GRMZM2G411764 // GRMZM2G010599 // GRMZM2G149257 // GRMZM2G177098 // GRMZM2G172932 // GRMZM2G069594 // GRMZM2G084465 // GRMZM2G132623 // AC234157.1_FG002 // GRMZM2G024354 // GRMZM2G019325
GO:0016616	F	oxidoreductase activity, acting on the CH-OH group of donors, NAD or NADP as acceptor	5	447	394	39203	0.47	1	// GRMZM5G848696 // GRMZM2G008792 // GRMZM2G073814 // GRMZM2G466833 // GRMZM2G007252
GO:0016741	F	transferase activity, transferring one-carbon groups	9	447	495	39203	0.12	1	// GRMZM2G021044 // GRMZM2G150248 // GRMZM2G131708 // GRMZM2G100344 // GRMZM2G169927 // GRMZM2G099363 // GRMZM2G080380 // GRMZM2G311036 // GRMZM2G148904
GO:0017171	F	serine hydrolase activity	8	447	511	39203	0.23	1	// GRMZM2G123815 // GRMZM2G348873 // GRMZM2G029641 // GRMZM2G118037 // GRMZM2G123940 // GRMZM2G013986 // GRMZM5G803334 // GRMZM2G017804
GO:0016614	F	oxidoreductase activity, acting on CH-OH group of donors	6	447	441	39203	0.39	1	// GRMZM2G008792 // GRMZM2G141214 // GRMZM2G007252 // GRMZM5G848696 // GRMZM2G466833 // GRMZM2G073814
GO:0008324	F	cation transmembrane transporter activity	10	447	996	39203	0.7	1	// GRMZM2G401139 // GRMZM2G177912 // GRMZM2G069229 // GRMZM5G862882 // GRMZM2G143512 // GRMZM2G080045 // GRMZM2G107306 // GRMZM2G151406 // GRMZM2G064467 // GRMZM2G331417
GO:0042578	F	phosphoric ester hydrolase activity	7	447	446	39203	0.25	1	// GRMZM5G868679 // GRMZM2G021846 // GRMZM2G010775 // GRMZM2G158734 // GRMZM2G434170 // GRMZM2G153274 // GRMZM2G142776
GO:0016818	F	hydrolase activity, acting on acid anhydrides, in phosphorus-containing anhydrides	22	447	1958	39203	0.56	1	// GRMZM2G041223 // GRMZM2G177912 // GRMZM2G301194 // GRMZM2G143512 // GRMZM2G090718 // GRMZM2G415538 // GRMZM2G122965 // GRMZM2G105335 // GRMZM2G119894 // GRMZM2G170982 // GRMZM2G417770 // GRMZM2G099862 // GRMZM2G151406 // GRMZM2G172932 // GRMZM2G162445 // GRMZM2G037472 // GRMZM2G086730 // AC199911.5_FG001 // GRMZM2G096764 // GRMZM2G060324 // GRMZM2G146047 // GRMZM2G333183
GO:0030554	F	adenyl nucleotide binding	54	447	5398	39203	0.87	1	// GRMZM2G301553 // GRMZM2G008792 // GRMZM2G139223 // GRMZM2G301194 // AC235547.1_FG005 // GRMZM2G096764 // GRMZM2G122965 // GRMZM2G041223 // GRMZM2G070961 // GRMZM2G105335 // GRMZM2G119894 // GRMZM2G179789 // GRMZM5G878070 // GRMZM2G173209 // GRMZM2G179279 // GRMZM5G821551 // GRMZM2G141214 // GRMZM2G179662 // GRMZM2G099862 // GRMZM2G180160 // GRMZM2G170982 // GRMZM2G412611 // GRMZM2G142437 // GR…
GO:0005524	F	ATP binding	50	447	5133	39203	0.9	1	// GRMZM2G301553 // GRMZM2G139223 // GRMZM2G301194 // AC235547.1_FG005 // GRMZM2G096764 // GRMZM2G122965 // GRMZM2G041223 // GRMZM2G070961 // GRMZM2G105335 // GRMZM2G119894 // GRMZM2G179789 // GRMZM5G878070 // GRMZM2G173209 // GRMZM2G179279 // GRMZM5G821551 // GRMZM2G179662 // GRMZM2G099862 // GRMZM2G180160 // GRMZM2G170982 // GRMZM2G412611 // GRMZM2G142437 // GRMZM5G856653 // GRMZM2G063676 // GR…
GO:0022890	F	inorganic cation transmembrane transporter activity	8	447	431	39203	0.13	1	// GRMZM2G401139 // GRMZM2G177912 // GRMZM2G069229 // GRMZM2G080045 // GRMZM2G107306 // GRMZM2G151406 // GRMZM2G064467 // GRMZM2G331417
GO:0016874	F	ligase activity	14	447	762	39203	0.059	1	// GRMZM2G301553 // GRMZM2G381709 // GRMZM2G111309 // GRMZM2G062499 // GRMZM2G090172 // GRMZM2G075104 // GRMZM2G039251 // GRMZM5G821551 // GRMZM2G049661 // GRMZM2G104847 // GRMZM2G142437 // GRMZM2G136313 // GRMZM2G152919 // GRMZM2G073310
GO:0015405	F	P-P-bond-hydrolysis-driven transmembrane transporter activity	7	447	394	39203	0.17	1	// GRMZM2G177912 // GRMZM2G143512 // GRMZM2G086730 // GRMZM2G151406 // AC199911.5_FG001 // GRMZM2G333183 // GRMZM2G119894
GO:0016787	F	hydrolase activity	68	447	6078	39203	0.59	1	// GRMZM2G041223 // GRMZM5G868679 // GRMZM2G301194 // GRMZM2G035636 // GRMZM2G060866 // GRMZM2G090718 // GRMZM2G415538 // GRMZM2G021846 // GRMZM2G174598 // GRMZM2G122965 // GRMZM2G434170 // GRMZM2G164134 // GRMZM2G118037 // GRMZM2G105335 // GRMZM2G119894 // GRMZM2G035620 // GRMZM2G060324 // GRMZM2G151406 // GRMZM2G348873 // GRMZM2G143512 // GRMZM2G048200 // GRMZM2G177912 // GRMZM2G099862 // GRMZM…
GO:0016817	F	hydrolase activity, acting on acid anhydrides	22	447	1980	39203	0.58	1	// GRMZM2G041223 // GRMZM2G177912 // GRMZM2G301194 // GRMZM2G143512 // GRMZM2G090718 // GRMZM2G415538 // GRMZM2G122965 // GRMZM2G105335 // GRMZM2G119894 // GRMZM2G170982 // GRMZM2G417770 // GRMZM2G099862 // GRMZM2G151406 // GRMZM2G172932 // GRMZM2G162445 // GRMZM2G037472 // GRMZM2G086730 // AC199911.5_FG001 // GRMZM2G096764 // GRMZM2G060324 // GRMZM2G146047 // GRMZM2G333183
GO:0016881	F	acid-amino acid ligase activity	9	447	390	39203	0.038	1	// GRMZM2G381709 // GRMZM2G062499 // GRMZM2G090172 // GRMZM2G075104 // GRMZM2G049661 // GRMZM2G142437 // GRMZM2G136313 // GRMZM2G152919 // GRMZM2G073310
GO:0003676	F	nucleic acid binding	63	447	8298	39203	1	1	// GRMZM2G360541 // GRMZM2G175541 // GRMZM2G309899 // GRMZM2G035092 // GRMZM2G047813 // GRMZM5G870592 // GRMZM5G825512 // GRMZM2G172621 // GRMZM2G171365 // GRMZM2G014750 // GRMZM2G181153 // GRMZM2G115925 // GRMZM2G130207 // GRMZM2G055217 // GRMZM2G059102 // GRMZM2G124524 // GRMZM2G135703 // GRMZM2G032655 // GRMZM2G030123 // GRMZM2G438293 // GRMZM2G007791 // GRMZM2G436226 // GRMZM2G114998 // GRMZM…
GO:0003677	F	DNA binding	41	447	5003	39203	0.99	1	// GRMZM2G360541 // GRMZM2G124524 // GRMZM2G047813 // GRMZM5G870592 // GRMZM5G825512 // GRMZM2G172621 // GRMZM2G035092 // GRMZM2G181153 // GRMZM2G130207 // GRMZM2G059102 // GRMZM2G010920 // GRMZM2G135703 // GRMZM2G032655 // GRMZM2G030123 // GRMZM2G438293 // GRMZM2G436226 // GRMZM2G114998 // GRMZM2G157722 // GRMZM2G088427 // GRMZM2G308034 // GRMZM2G169654 // GRMZM2G146490 // GRMZM2G162445 // GRMZM…
GO:0008168	F	methyltransferase activity	8	447	471	39203	0.18	1	// GRMZM2G021044 // GRMZM2G150248 // GRMZM2G131708 // GRMZM2G100344 // GRMZM2G169927 // GRMZM2G099363 // GRMZM2G311036 // GRMZM2G148904
GO:0020037	F	heme binding	9	447	876	39203	0.67	1	// GRMZM2G062151 // GRMZM2G067225 // GRMZM2G103169 // GRMZM2G090568 // GRMZM2G126261 // GRMZM2G179147 // GRMZM2G004211 // GRMZM2G170047 // GRMZM2G091588
GO:0042623	F	ATPase activity, coupled	10	447	579	39203	0.13	1	// GRMZM2G417770 // GRMZM2G177912 // GRMZM2G143512 // GRMZM2G086730 // GRMZM2G415538 // GRMZM2G151406 // AC199911.5_FG001 // GRMZM2G146047 // GRMZM2G333183 // GRMZM2G119894
GO:0015399	F	primary active transmembrane transporter activity	7	447	394	39203	0.17	1	// GRMZM2G177912 // GRMZM2G143512 // GRMZM2G086730 // GRMZM2G151406 // AC199911.5_FG001 // GRMZM2G333183 // GRMZM2G119894
GO:0017076	F	purine nucleotide binding	58	447	6079	39203	0.94	1	// GRMZM2G360541 // GRMZM2G008792 // GRMZM2G139223 // GRMZM2G301194 // AC235547.1_FG005 // GRMZM2G096764 // GRMZM2G122965 // GRMZM2G041223 // GRMZM2G070961 // GRMZM2G105335 // GRMZM2G119894 // GRMZM2G179789 // GRMZM5G878070 // GRMZM2G173209 // GRMZM2G179279 // GRMZM5G821551 // GRMZM2G141214 // GRMZM2G179662 // GRMZM2G099862 // GRMZM2G180160 // GRMZM2G170982 // GRMZM2G412611 // GRMZM2G142437 // GR…
GO:0046914	F	transition metal ion binding	47	447	5507	39203	0.99	1	// GRMZM2G103169 // GRMZM2G067225 // GRMZM2G116517 // GRMZM2G132169 // GRMZM2G143512 // GRMZM2G004211 // GRMZM2G172621 // GRMZM2G359589 // GRMZM2G375153 // GRMZM2G138349 // GRMZM2G091588 // GRMZM2G173209 // GRMZM2G041269 // GRMZM2G062151 // GRMZM2G079477 // GRMZM2G135703 // GRMZM2G049661 // GRMZM2G116632 // GRMZM2G121115 // GRMZM2G113177 // GRMZM2G141376 // GRMZM2G368206 // GRMZM2G013448 // GRMZM…
GO:0016788	F	hydrolase activity, acting on ester bonds	12	447	1355	39203	0.85	1	// GRMZM2G164929 // GRMZM5G868679 // AC186577.3_FG006 // GRMZM2G021846 // GRMZM2G060866 // GRMZM2G153274 // GRMZM2G010775 // GRMZM2G158734 // GRMZM2G434170 // GRMZM2G044947 // GRMZM2G048200 // GRMZM2G142776
GO:0003824	F	catalytic activity	216	447	17617	39203	0.084	1	// GRMZM2G301553 // GRMZM2G008792 // GRMZM2G156816 // GRMZM2G139223 // GRMZM2G177912 // GRMZM2G132169 // GRMZM2G153274 // GRMZM2G123815 // GRMZM2G083427 // GRMZM2G070961 // GRMZM2G118037 // GRMZM2G119894 // GRMZM2G173926 // GRMZM2G091588 // GRMZM2G168304 // GRMZM2G007252 // GRMZM2G164912 // GRMZM2G048200 // GRMZM2G179662 // GRMZM2G311036 // GRMZM2G099862 // GRMZM2G057910 // GRMZM2G162445 // GRMZM…
GO:0009055	F	electron carrier activity	7	447	914	39203	0.9	1	// GRMZM2G062151 // GRMZM2G067225 // GRMZM2G116632 // GRMZM2G179147 // GRMZM2G170047 // GRMZM2G091588 // GRMZM2G436199
GO:0022892	F	substrate-specific transporter activity	15	447	1632	39203	0.83	1	// GRMZM2G401139 // GRMZM2G177912 // GRMZM2G069229 // GRMZM5G862882 // GRMZM2G143512 // GRMZM2G080045 // GRMZM2G074267 // GRMZM2G107306 // GRMZM2G151406 // GRMZM2G084389 // GRMZM2G078292 // GRMZM2G064467 // GRMZM2G128454 // GRMZM2G434910 // GRMZM2G331417
GO:0019787	F	small conjugating protein ligase activity	6	447	324	39203	0.17	1	// GRMZM2G062499 // GRMZM2G075104 // GRMZM2G049661 // GRMZM2G136313 // GRMZM2G152919 // GRMZM2G073310
GO:0016772	F	transferase activity, transferring phosphorus-containing groups	33	447	3661	39203	0.94	1	// GRMZM2G139223 // AC235547.1_FG005 // GRMZM2G177947 // GRMZM2G046498 // GRMZM2G070961 // GRMZM2G130207 // GRMZM5G878070 // GRMZM2G179789 // GRMZM2G179279 // GRMZM2G179662 // GRMZM2G180160 // GRMZM2G412611 // GRMZM5G856653 // GRMZM2G173209 // GRMZM2G021846 // GRMZM2G383240 // GRMZM2G074262 // GRMZM2G004590 // GRMZM2G080041 // GRMZM2G700291 // GRMZM2G418689 // GRMZM2G456644 // GRMZM2G002531 // GR…
GO:0015075	F	ion transmembrane transporter activity	10	447	1258	39203	0.91	1	// GRMZM2G401139 // GRMZM2G177912 // GRMZM2G069229 // GRMZM5G862882 // GRMZM2G143512 // GRMZM2G080045 // GRMZM2G107306 // GRMZM2G151406 // GRMZM2G064467 // GRMZM2G331417
GO:0032555	F	purine ribonucleotide binding	55	447	5800	39203	0.94	1	// GRMZM2G360541 // GRMZM2G301553 // GRMZM2G139223 // GRMZM2G301194 // AC235547.1_FG005 // GRMZM2G096764 // GRMZM2G122965 // GRMZM2G041223 // GRMZM2G070961 // GRMZM2G105335 // GRMZM2G119894 // GRMZM2G179789 // GRMZM5G878070 // GRMZM2G173209 // GRMZM2G179279 // GRMZM5G821551 // GRMZM2G179662 // GRMZM2G099862 // GRMZM2G180160 // GRMZM2G170982 // GRMZM2G412611 // GRMZM2G142437 // GRMZM2G172932 // GR…
GO:0046983	F	protein dimerization activity	14	447	745	39203	0.051	1	// GRMZM2G030123 // GRMZM2G181153 // GRMZM2G047813 // GRMZM2G311036 // GRMZM2G099522 // GRMZM2G035092 // GRMZM2G015666 // GRMZM2G171365 // GRMZM2G018375 // GRMZM2G018589 // GRMZM2G021406 // GRMZM2G072238 // GRMZM2G059102 // GRMZM2G147716
GO:0032553	F	ribonucleotide binding	55	447	5800	39203	0.94	1	// GRMZM2G360541 // GRMZM2G301553 // GRMZM2G139223 // GRMZM2G301194 // AC235547.1_FG005 // GRMZM2G096764 // GRMZM2G122965 // GRMZM2G041223 // GRMZM2G070961 // GRMZM2G105335 // GRMZM2G119894 // GRMZM2G179789 // GRMZM5G878070 // GRMZM2G173209 // GRMZM2G179279 // GRMZM5G821551 // GRMZM2G179662 // GRMZM2G099862 // GRMZM2G180160 // GRMZM2G170982 // GRMZM2G412611 // GRMZM2G142437 // GRMZM2G172932 // GR…
GO:0016791	F	phosphatase activity	6	447	347	39203	0.21	1	// GRMZM5G868679 // GRMZM2G021846 // GRMZM2G010775 // GRMZM2G158734 // GRMZM2G434170 // GRMZM2G142776
GO:0016798	F	hydrolase activity, acting on glycosyl bonds	9	447	821	39203	0.59	1	// GRMZM2G088753 // GRMZM2G308707 // GRMZM2G482256 // GRMZM2G069024 // GRMZM2G076049 // GRMZM2G005298 // GRMZM2G174598 // GRMZM2G175218 // GRMZM2G480451
GO:0008233	F	peptidase activity	19	447	1529	39203	0.39	1	// GRMZM2G123815 // GRMZM2G118037 // GRMZM2G417770 // GRMZM2G463291 // GRMZM2G029641 // GRMZM2G128268 // GRMZM2G159171 // GRMZM2G144440 // GRMZM2G096764 // GRMZM2G112337 // GRMZM2G133249 // GRMZM2G348873 // GRMZM2G035636 // GRMZM2G123940 // GRMZM2G033671 // GRMZM2G013986 // GRMZM5G803334 // GRMZM2G132238 // GRMZM2G017804
GO:0043167	F	ion binding	71	447	6665	39203	0.75	1	// GRMZM2G064371 // GRMZM2G103169 // GRMZM2G067225 // GRMZM5G868679 // GRMZM2G132169 // GRMZM2G143512 // GRMZM2G375153 // GRMZM2G172621 // GRMZM2G090718 // GRMZM2G177947 // GRMZM2G359589 // GRMZM2G004211 // GRMZM2G138349 // GRMZM2G117412 // GRMZM2G091588 // GRMZM2G173209 // GRMZM2G038519 // GRMZM2G151406 // GRMZM2G133249 // GRMZM2G062151 // GRMZM2G116517 // GRMZM2G079477 // GRMZM2G063220 // GRMZM…
GO:0016491	F	oxidoreductase activity	35	447	3266	39203	0.67	1	// AF466202.2_FG007 // GRMZM2G008792 // GRMZM2G067225 // GRMZM2G132169 // GRMZM5G848696 // GRMZM2G004211 // GRMZM2G046804 // GRMZM2G073814 // GRMZM2G091588 // GRMZM2G081016 // GRMZM2G007252 // GRMZM2G141214 // GRMZM2G062151 // GRMZM2G150248 // GRMZM2G057910 // GRMZM2G341460 // GRMZM2G063048 // GRMZM2G141376 // GRMZM2G044469 // GRMZM2G013448 // GRMZM2G401139 // GRMZM2G436199 // GRMZM2G090568 // GR…
GO:0016820	F	hydrolase activity, acting on acid anhydrides, catalyzing transmembrane movement of substances	7	447	322	39203	0.081	1	// GRMZM2G177912 // GRMZM2G143512 // GRMZM2G086730 // GRMZM2G151406 // AC199911.5_FG001 // GRMZM2G333183 // GRMZM2G119894
GO:0016829	F	lyase activity	7	447	655	39203	0.62	1	// GRMZM2G067225 // GRMZM2G446253 // GRMZM2G437912 // GRMZM2G069542 // GRMZM2G414528 // GRMZM2G066345 // GRMZM2G177098
GO:0008270	F	zinc ion binding	25	447	3989	39203	1	1	// GRMZM2G041269 // GRMZM2G172621 // GRMZM2G359589 // GRMZM2G375153 // GRMZM2G138349 // GRMZM2G135703 // GRMZM2G049661 // GRMZM2G121115 // GRMZM2G113177 // GRMZM2G368206 // GRMZM2G092363 // GRMZM2G003424 // GRMZM2G414528 // GRMZM2G151934 // GRMZM2G456471 // GRMZM2G114998 // GRMZM2G436226 // GRMZM2G068590 // GRMZM2G021044 // GRMZM5G855894 // GRMZM2G018375 // GRMZM2G146047 // GRMZM2G064371 // GRMZM…
GO:0043565	F	sequence-specific DNA binding	8	447	985	39203	0.87	1	// GRMZM2G094352 // GRMZM2G438293 // GRMZM2G125976 // GRMZM2G016150 // GRMZM2G019907 // GRMZM2G157722 // GRMZM2G137532 // GRMZM2G088242
GO:0016301	F	kinase activity	30	447	3006	39203	0.8	1	// GRMZM2G139223 // AC235547.1_FG005 // GRMZM2G046498 // GRMZM2G070961 // GRMZM2G179789 // GRMZM5G878070 // GRMZM2G173209 // GRMZM2G179279 // GRMZM2G179662 // GRMZM2G180160 // GRMZM2G412611 // GRMZM5G856653 // GRMZM2G177947 // GRMZM2G021846 // GRMZM2G383240 // GRMZM2G074262 // GRMZM2G004590 // GRMZM2G080041 // GRMZM2G700291 // GRMZM2G418689 // GRMZM2G456644 // GRMZM2G002531 // GRMZM2G162781 // GR…
GO:0016879	F	ligase activity, forming carbon-nitrogen bonds	10	447	514	39203	0.075	1	// GRMZM2G381709 // GRMZM2G111309 // GRMZM2G062499 // GRMZM2G090172 // GRMZM2G075104 // GRMZM2G049661 // GRMZM2G142437 // GRMZM2G136313 // GRMZM2G152919 // GRMZM2G073310
GO:0005509	F	calcium ion binding	8	447	534	39203	0.27	1	// GRMZM2G000397 // GRMZM2G402171 // GRMZM2G063220 // GRMZM2G180160 // GRMZM2G097827 // GRMZM2G355525 // GRMZM2G099363 // GRMZM2G140949
GO:0005506	F	iron ion binding	11	447	1187	39203	0.79	1	// GRMZM2G062151 // GRMZM2G067225 // GRMZM2G103169 // GRMZM2G090568 // GRMZM2G399338 // GRMZM2G126261 // GRMZM2G179147 // GRMZM2G004211 // GRMZM2G170047 // GRMZM2G091588 // GRMZM2G013448
GO:0005215	F	transporter activity	24	447	2411	39203	0.78	1	// GRMZM5G842695 // GRMZM2G177912 // GRMZM2G143512 // GRMZM2G158807 // GRMZM2G128454 // GRMZM2G119894 // GRMZM2G434910 // GRMZM2G331417 // GRMZM5G827496 // GRMZM5G862882 // GRMZM2G010765 // GRMZM2G107306 // GRMZM2G151406 // GRMZM2G078292 // GRMZM2G401139 // GRMZM2G074267 // GRMZM2G080045 // GRMZM2G086730 // AC199911.5_FG001 // GRMZM2G178190 // GRMZM2G069229 // GRMZM2G084389 // GRMZM2G333183 // GR…
GO:0046906	F	tetrapyrrole binding	9	447	880	39203	0.67	1	// GRMZM2G062151 // GRMZM2G067225 // GRMZM2G103169 // GRMZM2G090568 // GRMZM2G126261 // GRMZM2G179147 // GRMZM2G004211 // GRMZM2G170047 // GRMZM2G091588
GO:0046872	F	metal ion binding	69	447	6652	39203	0.82	1	// GRMZM2G064371 // GRMZM2G103169 // GRMZM2G067225 // GRMZM5G868679 // GRMZM2G132169 // GRMZM2G143512 // GRMZM2G375153 // GRMZM2G172621 // GRMZM2G090718 // GRMZM2G177947 // GRMZM2G359589 // GRMZM2G004211 // GRMZM2G138349 // GRMZM2G117412 // GRMZM2G091588 // GRMZM2G173209 // GRMZM2G038519 // GRMZM2G151406 // GRMZM2G133249 // GRMZM2G062151 // GRMZM2G116517 // GRMZM2G079477 // GRMZM2G063220 // GRMZM…
GO:0016853	F	isomerase activity	8	447	567	39203	0.32	1	// GRMZM2G133082 // GRMZM2G057329 // GRMZM2G076544 // GRMZM2G456471 // GRMZM2G060011 // GRMZM5G874903 // GRMZM2G042179 // GRMZM2G155753
GO:0000166	F	nucleotide binding	69	447	6408	39203	0.72	1	// GRMZM2G360541 // GRMZM2G008792 // GRMZM2G139223 // GRMZM2G301194 // GRMZM2G143512 // AC235547.1_FG005 // GRMZM2G039251 // GRMZM2G415538 // GRMZM2G162781 // GRMZM2G041223 // GRMZM2G070961 // GRMZM2G046804 // GRMZM2G105335 // GRMZM2G119894 // GRMZM2G179789 // GRMZM5G878070 // GRMZM2G173209 // GRMZM2G179279 // GRMZM2G007252 // GRMZM2G141214 // GRMZM2G179662 // GRMZM2G150248 // GRMZM2G099862 // GR…
GO:0016773	F	phosphotransferase activity, alcohol group as acceptor	27	447	2858	39203	0.87	1	// GRMZM2G139223 // AC235547.1_FG005 // GRMZM2G046498 // GRMZM2G070961 // GRMZM2G179789 // GRMZM5G878070 // GRMZM2G179279 // GRMZM2G179662 // GRMZM2G180160 // GRMZM5G856653 // GRMZM2G177947 // GRMZM2G021846 // GRMZM2G383240 // GRMZM2G074262 // GRMZM2G004590 // GRMZM2G080041 // GRMZM2G700291 // GRMZM2G418689 // GRMZM2G002531 // GRMZM2G162781 // GRMZM2G098037 // GRMZM5G871520 // GRMZM2G071573 // GR…
GO:0003723	F	RNA binding	7	447	1088	39203	0.96	1	// GRMZM2G158024 // GRMZM2G122290 // GRMZM2G060324 // AC166636.1_FG009 // GRMZM2G019325 // GRMZM2G122569 // GRMZM2G055217
GO:0016835	F	carbon-oxygen lyase activity	5	447	181	39203	0.06	1	// GRMZM2G414528 // GRMZM2G446253 // GRMZM2G437912 // GRMZM2G177098 // GRMZM2G067225
GO:0043492	F	ATPase activity, coupled to movement of substances	7	447	300	39203	0.061	1	// GRMZM2G177912 // GRMZM2G143512 // GRMZM2G086730 // GRMZM2G151406 // AC199911.5_FG001 // GRMZM2G333183 // GRMZM2G119894
GO:0005488	F	binding	240	447	24279	39203	1	1	// GRMZM2G301553 // GRMZM2G008792 // GRMZM2G139223 // GRMZM2G010920 // GRMZM2G047813 // GRMZM2G008060 // GRMZM2G096247 // GRMZM5G870592 // GRMZM5G825512 // GRMZM2G172621 // GRMZM2G072518 // GRMZM2G070961 // GRMZM2G118037 // GRMZM2G138349 // GRMZM2G055217 // GRMZM2G091588 // GRMZM2G113089 // GRMZM2G118825 // GRMZM2G007252 // GRMZM2G141214 // GRMZM2G179662 // GRMZM2G311036 // GRMZM2G099862 // GRMZM…
GO:0004175	F	endopeptidase activity	14	447	932	39203	0.19	1	// GRMZM2G463291 // GRMZM2G128268 // GRMZM2G118037 // GRMZM2G144440 // GRMZM2G096764 // GRMZM2G112337 // GRMZM2G133249 // GRMZM2G348873 // GRMZM2G035636 // GRMZM2G033671 // GRMZM2G013986 // GRMZM5G803334 // GRMZM2G132238 // GRMZM2G017804
GO:0016887	F	ATPase activity	10	447	785	39203	0.41	1	// GRMZM2G417770 // GRMZM2G177912 // GRMZM2G143512 // GRMZM2G086730 // GRMZM2G415538 // GRMZM2G151406 // AC199911.5_FG001 // GRMZM2G146047 // GRMZM2G333183 // GRMZM2G119894
GO:0004553	F	hydrolase activity, hydrolyzing O-glycosyl compounds	8	447	767	39203	0.65	1	// GRMZM2G088753 // GRMZM2G482256 // GRMZM2G308707 // GRMZM2G069024 // GRMZM2G005298 // GRMZM2G174598 // GRMZM2G076049 // GRMZM2G175218
GO:0017111	F	nucleoside-triphosphatase activity	18	447	1822	39203	0.76	1	// GRMZM2G151406 // GRMZM2G417770 // GRMZM2G177912 // GRMZM2G301194 // GRMZM2G143512 // GRMZM2G086730 // GRMZM2G096764 // GRMZM2G415538 // GRMZM2G170982 // AC199911.5_FG001 // GRMZM2G146047 // GRMZM2G333183 // GRMZM2G172932 // GRMZM2G119894 // GRMZM2G060324 // GRMZM2G122965 // GRMZM2G162445 // GRMZM2G037472
GO:0001882	F	nucleoside binding	54	447	5400	39203	0.87	1	// GRMZM2G301553 // GRMZM2G008792 // GRMZM2G139223 // GRMZM2G301194 // AC235547.1_FG005 // GRMZM2G096764 // GRMZM2G122965 // GRMZM2G041223 // GRMZM2G070961 // GRMZM2G105335 // GRMZM2G119894 // GRMZM2G179789 // GRMZM5G878070 // GRMZM2G173209 // GRMZM2G179279 // GRMZM5G821551 // GRMZM2G141214 // GRMZM2G179662 // GRMZM2G099862 // GRMZM2G180160 // GRMZM2G170982 // GRMZM2G412611 // GRMZM2G142437 // GR…
GO:0050662	F	coenzyme binding	6	447	734	39203	0.84	1	// GRMZM2G008792 // GRMZM2G141214 // GRMZM2G073774 // GRMZM2G046804 // GRMZM2G073814 // GRMZM2G042179
GO:0016462	F	pyrophosphatase activity	19	447	1907	39203	0.76	1	// GRMZM2G151406 // GRMZM2G417770 // GRMZM2G177912 // GRMZM2G301194 // GRMZM2G143512 // GRMZM2G086730 // GRMZM2G096764 // GRMZM2G090718 // GRMZM2G415538 // GRMZM2G170982 // AC199911.5_FG001 // GRMZM2G146047 // GRMZM2G333183 // GRMZM2G172932 // GRMZM2G119894 // GRMZM2G060324 // GRMZM2G122965 // GRMZM2G162445 // GRMZM2G037472
GO:0022857	F	transmembrane transporter activity	20	447	1672	39203	0.45	1	// GRMZM5G842695 // GRMZM2G401139 // GRMZM2G086730 // GRMZM2G177912 // GRMZM2G069229 // GRMZM5G862882 // GRMZM2G143512 // GRMZM2G010765 // GRMZM2G074267 // GRMZM2G107306 // GRMZM2G151406 // AC199911.5_FG001 // GRMZM2G084389 // GRMZM2G333183 // GRMZM2G078292 // GRMZM2G064467 // GRMZM2G119894 // GRMZM2G434910 // GRMZM2G080045 // GRMZM2G331417
GO:0030528	F	transcription regulator activity	18	447	2233	39203	0.95	1	// GRMZM2G094352 // GRMZM2G360541 // GRMZM2G157722 // GRMZM2G088242 // GRMZM2G121115 // GRMZM2G438293 // GRMZM2G125976 // GRMZM2G099522 // GRMZM2G171365 // GRMZM2G169654 // GRMZM2G016150 // GRMZM2G018589 // GRMZM2G019907 // GRMZM2G124524 // GRMZM2G147716 // GRMZM2G137532 // GRMZM2G059102 // GRMZM2G399072
GO:0003735	F	structural constituent of ribosome	14	447	1378	39203	0.71	1	// GRMZM2G099657 // GRMZM2G140116 // GRMZM2G130358 // GRMZM2G122290 // GRMZM2G411764 // GRMZM2G010599 // GRMZM2G149257 // GRMZM2G177098 // GRMZM2G069594 // GRMZM2G084465 // GRMZM2G132623 // AC234157.1_FG002 // GRMZM2G024354 // GRMZM2G019325
GO:0004674	F	protein serine/threonine kinase activity	14	447	2248	39203	1	1	// GRMZM2G002531 // GRMZM2G139223 // GRMZM2G700291 // GRMZM2G179662 // GRMZM2G098037 // GRMZM5G871520 // GRMZM2G383240 // GRMZM2G074262 // GRMZM2G180160 // GRMZM2G080041 // GRMZM2G070961 // GRMZM2G350918 // GRMZM2G418689 // GRMZM2G048455
GO:0001883	F	purine nucleoside binding	54	447	5398	39203	0.87	1	// GRMZM2G301553 // GRMZM2G008792 // GRMZM2G139223 // GRMZM2G301194 // AC235547.1_FG005 // GRMZM2G096764 // GRMZM2G122965 // GRMZM2G041223 // GRMZM2G070961 // GRMZM2G105335 // GRMZM2G119894 // GRMZM2G179789 // GRMZM5G878070 // GRMZM2G173209 // GRMZM2G179279 // GRMZM5G821551 // GRMZM2G141214 // GRMZM2G179662 // GRMZM2G099862 // GRMZM2G180160 // GRMZM2G170982 // GRMZM2G412611 // GRMZM2G142437 // GR…
GO:0004672	F	protein kinase activity	22	447	2423	39203	0.89	1	// GRMZM2G139223 // AC235547.1_FG005 // GRMZM2G070961 // GRMZM2G179789 // GRMZM5G878070 // GRMZM2G179279 // GRMZM2G179662 // GRMZM2G180160 // GRMZM2G383240 // GRMZM2G074262 // GRMZM2G080041 // GRMZM2G700291 // GRMZM2G418689 // GRMZM2G002531 // GRMZM2G162781 // GRMZM2G098037 // GRMZM5G871520 // GRMZM2G071573 // GRMZM2G177445 // GRMZM2G350918 // GRMZM2G048455 // GRMZM2G165428
GO:0032559	F	adenyl ribonucleotide binding	51	447	5137	39203	0.87	1	// GRMZM2G301553 // GRMZM2G139223 // GRMZM2G301194 // AC235547.1_FG005 // GRMZM2G096764 // GRMZM2G122965 // GRMZM2G041223 // GRMZM2G070961 // GRMZM2G105335 // GRMZM2G119894 // GRMZM2G179789 // GRMZM5G878070 // GRMZM2G173209 // GRMZM2G179279 // GRMZM5G821551 // GRMZM2G179662 // GRMZM2G099862 // GRMZM2G180160 // GRMZM2G170982 // GRMZM2G412611 // GRMZM2G142437 // GRMZM5G856653 // GRMZM2G063676 // GR…
GO:0022804	F	active transmembrane transporter activity	13	447	825	39203	0.16	1	// GRMZM5G842695 // GRMZM2G177912 // GRMZM2G143512 // GRMZM2G080045 // GRMZM2G086730 // GRMZM2G151406 // AC199911.5_FG001 // GRMZM2G084389 // GRMZM2G333183 // GRMZM2G078292 // GRMZM2G119894 // GRMZM2G434910 // GRMZM2G010765
GO:0030234	F	enzyme regulator activity	7	447	552	39203	0.44	1	// GRMZM2G164929 // GRMZM2G436199 // AC186577.3_FG006 // GRMZM2G067485 // GRMZM2G147780 // GRMZM2G138349 // GRMZM2G108991
GO:0042626	F	ATPase activity, coupled to transmembrane movement of substances	7	447	300	39203	0.061	1	// GRMZM2G177912 // GRMZM2G143512 // GRMZM2G086730 // GRMZM2G151406 // AC199911.5_FG001 // GRMZM2G333183 // GRMZM2G119894
GO:0022891	F	substrate-specific transmembrane transporter activity	14	447	1472	39203	0.79	1	// GRMZM2G401139 // GRMZM2G177912 // GRMZM2G069229 // GRMZM5G862882 // GRMZM2G143512 // GRMZM2G080045 // GRMZM2G074267 // GRMZM2G107306 // GRMZM2G151406 // GRMZM2G084389 // GRMZM2G078292 // GRMZM2G064467 // GRMZM2G434910 // GRMZM2G331417
GO:0003700	F	transcription factor activity	17	447	1390	39203	0.42	1	// GRMZM2G094352 // GRMZM2G360541 // GRMZM2G157722 // GRMZM2G088242 // GRMZM2G124524 // GRMZM2G438293 // GRMZM2G125976 // GRMZM2G099522 // GRMZM2G171365 // GRMZM2G169654 // GRMZM2G016150 // GRMZM2G018589 // GRMZM2G019907 // GRMZM2G147716 // GRMZM2G137532 // GRMZM2G059102 // GRMZM2G399072
GO:0048037	F	cofactor binding	8	447	1034	39203	0.9	1	// GRMZM2G008792 // GRMZM2G141214 // GRMZM2G073774 // GRMZM2G039251 // GRMZM2G046804 // GRMZM2G073814 // GRMZM2G042179 // GRMZM2G134248
GO:0009536	C	plastid	60	447	69	39203	3.9e-82	1.2e-79	// GRMZM2G065950 // GRMZM2G099657 // GRMZM2G067225 // GRMZM2G177912 // GRMZM2G348873 // GRMZM2G446253 // GRMZM2G087435 // GRMZM2G076544 // GRMZM2G128454 // GRMZM2G080380 // GRMZM2G149257 // GRMZM2G181153 // GRMZM2G004211 // GRMZM5G826194 // GRMZM2G117412 // GRMZM2G035620 // GRMZM2G038519 // GRMZM2G150030 // GRMZM2G140116 // GRMZM2G417770 // GRMZM2G000397 // GRMZM2G079477 // GRMZM2G131708 // GRMZM…
GO:0005886	C	plasma membrane	50	447	149	39203	1.9e-52	2.8e-50	// GRMZM2G099657 // GRMZM2G177912 // GRMZM2G057329 // GRMZM2G004211 // GRMZM2G123940 // GRMZM2G010775 // GRMZM2G128454 // GRMZM2G181153 // GRMZM2G029184 // GRMZM2G446253 // GRMZM2G138349 // GRMZM2G173209 // GRMZM2G171595 // GRMZM2G140116 // GRMZM2G162781 // GRMZM5G803334 // GRMZM2G010765 // GRMZM2G127338 // GRMZM2G141376 // GRMZM2G080045 // GRMZM2G063676 // GRMZM2G065950 // GRMZM2G054916 // GRMZM…
GO:0044444	C	cytoplasmic part	129	447	2678	39203	1.2e-44	1.2e-42	// GRMZM2G177912 // GRMZM2G021864 // GRMZM2G083427 // GRMZM2G149257 // GRMZM2G181153 // GRMZM2G138349 // GRMZM2G411764 // GRMZM2G164912 // GRMZM5G832582 // GRMZM2G116517 // GRMZM2G332562 // GRMZM2G107306 // GRMZM2G057910 // GRMZM2G069594 // GRMZM2G133203 // GRMZM2G000397 // GRMZM2G036534 // GRMZM2G090271 // GRMZM2G437912 // GRMZM2G158734 // GRMZM2G414528 // GRMZM2G153274 // GRMZM2G173317 // AC234…
GO:0005737	C	cytoplasm	137	447	3593	39203	6.9e-37	5.2e-35	// GRMZM2G301553 // GRMZM2G177912 // GRMZM2G021864 // GRMZM2G083427 // GRMZM2G149257 // GRMZM2G181153 // GRMZM2G138349 // GRMZM2G411764 // GRMZM2G164912 // GRMZM5G832582 // GRMZM2G116517 // GRMZM2G179662 // GRMZM2G332562 // GRMZM2G107306 // GRMZM2G057910 // GRMZM2G069594 // GRMZM2G133203 // GRMZM2G000397 // GRMZM2G036534 // GRMZM2G172932 // GRMZM2G090271 // GRMZM2G437912 // GRMZM2G158734 // GRMZM…
GO:0043231	C	intracellular membrane-bounded organelle	145	447	4093	39203	7.5e-36	4.5e-34	// GRMZM2G177912 // GRMZM2G021864 // GRMZM5G825512 // GRMZM2G083427 // GRMZM2G149257 // GRMZM2G181153 // GRMZM2G138349 // GRMZM2G164912 // GRMZM5G832582 // GRMZM2G047813 // GRMZM2G052423 // GRMZM2G099862 // GRMZM2G332562 // GRMZM2G107306 // GRMZM2G169654 // GRMZM2G133203 // GRMZM2G162445 // GRMZM2G000397 // GRMZM2G036534 // GRMZM2G099522 // GRMZM2G068471 // GRMZM2G158734 // GRMZM2G414528 // GRMZM…
GO:0043227	C	membrane-bounded organelle	145	447	4127	39203	1.8e-35	9.2e-34	// GRMZM2G177912 // GRMZM2G021864 // GRMZM5G825512 // GRMZM2G083427 // GRMZM2G149257 // GRMZM2G181153 // GRMZM2G138349 // GRMZM2G164912 // GRMZM5G832582 // GRMZM2G047813 // GRMZM2G052423 // GRMZM2G099862 // GRMZM2G332562 // GRMZM2G107306 // GRMZM2G169654 // GRMZM2G133203 // GRMZM2G162445 // GRMZM2G000397 // GRMZM2G036534 // GRMZM2G099522 // GRMZM2G068471 // GRMZM2G158734 // GRMZM2G414528 // GRMZM…
GO:0005773	C	vacuole	21	447	38	39203	2.7e-26	1.2e-24	// GRMZM2G065950 // GRMZM2G178190 // GRMZM2G159171 // GRMZM2G140116 // GRMZM2G308707 // GRMZM2G177912 // GRMZM2G057329 // GRMZM2G029641 // GRMZM2G332562 // GRMZM2G074267 // GRMZM2G107306 // GRMZM2G090568 // GRMZM2G166976 // GRMZM2G052423 // AC199911.5_FG001 // GRMZM2G139374 // GRMZM2G181153 // GRMZM2G004211 // GRMZM2G138349 // GRMZM2G173317 // GRMZM2G153274
GO:0043229	C	intracellular organelle	158	447	6224	39203	1.6e-23	5.5e-22	// GRMZM2G177912 // GRMZM2G021864 // GRMZM5G825512 // GRMZM2G083427 // GRMZM2G149257 // GRMZM2G181153 // GRMZM2G138349 // GRMZM2G411764 // GRMZM2G164912 // GRMZM5G832582 // GRMZM2G047813 // GRMZM2G052423 // GRMZM2G099862 // GRMZM2G332562 // GRMZM2G107306 // GRMZM2G169654 // GRMZM2G069594 // GRMZM2G133203 // GRMZM2G162445 // GRMZM2G000397 // GRMZM2G036534 // GRMZM2G076049 // GRMZM2G099522 // GRMZM…
GO:0043226	C	organelle	158	447	6224	39203	1.6e-23	5.5e-22	// GRMZM2G177912 // GRMZM2G021864 // GRMZM5G825512 // GRMZM2G083427 // GRMZM2G149257 // GRMZM2G181153 // GRMZM2G138349 // GRMZM2G411764 // GRMZM2G164912 // GRMZM5G832582 // GRMZM2G047813 // GRMZM2G052423 // GRMZM2G099862 // GRMZM2G332562 // GRMZM2G107306 // GRMZM2G169654 // GRMZM2G069594 // GRMZM2G133203 // GRMZM2G162445 // GRMZM2G000397 // GRMZM2G036534 // GRMZM2G076049 // GRMZM2G099522 // GRMZM…
GO:0044424	C	intracellular part	181	447	7930	39203	2.3e-22	7e-21	// GRMZM2G301553 // GRMZM2G177912 // GRMZM2G021864 // GRMZM5G825512 // GRMZM2G083427 // GRMZM2G149257 // GRMZM2G181153 // GRMZM2G118037 // GRMZM2G138349 // GRMZM2G063048 // GRMZM2G164912 // GRMZM5G832582 // GRMZM2G047813 // GRMZM2G179662 // GRMZM2G052423 // GRMZM2G099862 // GRMZM2G332562 // GRMZM2G107306 // GRMZM2G057910 // GRMZM2G169654 // GRMZM2G069594 // GRMZM2G133203 // GRMZM2G162445 // GRMZM…
GO:0044422	C	organelle part	74	447	1764	39203	1.5e-21	3.9e-20	// GRMZM2G360541 // GRMZM2G065950 // GRMZM2G099657 // GRMZM2G067225 // GRMZM2G047813 // GRMZM2G301194 // GRMZM2G348873 // GRMZM2G118250 // GRMZM5G825512 // GRMZM2G166976 // GRMZM2G076544 // GRMZM2G115925 // GRMZM2G080380 // GRMZM2G122965 // GRMZM2G149257 // GRMZM2G181153 // GRMZM2G004211 // GRMZM5G826194 // GRMZM2G128454 // GRMZM2G130207 // GRMZM2G346133 // GRMZM2G038519 // GRMZM2G063048 // GRMZM…
GO:0044446	C	intracellular organelle part	74	447	1764	39203	1.5e-21	3.9e-20	// GRMZM2G360541 // GRMZM2G065950 // GRMZM2G099657 // GRMZM2G067225 // GRMZM2G047813 // GRMZM2G301194 // GRMZM2G348873 // GRMZM2G118250 // GRMZM5G825512 // GRMZM2G166976 // GRMZM2G076544 // GRMZM2G115925 // GRMZM2G080380 // GRMZM2G122965 // GRMZM2G149257 // GRMZM2G181153 // GRMZM2G004211 // GRMZM5G826194 // GRMZM2G128454 // GRMZM2G130207 // GRMZM2G346133 // GRMZM2G038519 // GRMZM2G063048 // GRMZM…
GO:0005829	C	cytosol	23	447	160	39203	1.7e-17	4e-16	// GRMZM2G057329 // GRMZM2G013176 // GRMZM2G446253 // GRMZM2G149257 // GRMZM2G181153 // GRMZM2G080380 // GRMZM2G035620 // GRMZM2G140116 // GRMZM2G162781 // GRMZM2G057910 // GRMZM2G411764 // GRMZM2G084465 // GRMZM2G021846 // GRMZM2G437912 // GRMZM2G158734 // GRMZM2G019325 // GRMZM2G010599 // GRMZM2G126002 // GRMZM2G069203 // GRMZM2G168510 // GRMZM2G118037 // GRMZM2G021406 // GRMZM2G024354
GO:0044464	C	cell part	246	447	13914	39203	4.6e-17	9.2e-16	// GRMZM2G301553 // GRMZM2G177912 // GRMZM2G021864 // GRMZM5G825512 // GRMZM2G158807 // GRMZM2G083427 // GRMZM2G034668 // GRMZM2G149257 // GRMZM2G181153 // GRMZM2G118037 // GRMZM2G138349 // GRMZM2G090172 // GRMZM2G168304 // GRMZM2G331417 // GRMZM2G105192 // GRMZM2G063048 // GRMZM2G164912 // GRMZM5G832582 // GRMZM2G047813 // GRMZM2G179662 // GRMZM2G052423 // GRMZM2G099862 // GRMZM2G010765 // GRMZM…
GO:0005623	C	cell	246	447	13914	39203	4.6e-17	9.2e-16	// GRMZM2G301553 // GRMZM2G177912 // GRMZM2G021864 // GRMZM5G825512 // GRMZM2G158807 // GRMZM2G083427 // GRMZM2G034668 // GRMZM2G149257 // GRMZM2G181153 // GRMZM2G118037 // GRMZM2G138349 // GRMZM2G090172 // GRMZM2G168304 // GRMZM2G331417 // GRMZM2G105192 // GRMZM2G063048 // GRMZM2G164912 // GRMZM5G832582 // GRMZM2G047813 // GRMZM2G179662 // GRMZM2G052423 // GRMZM2G099862 // GRMZM2G010765 // GRMZM…
GO:0005911	C	cell-cell junction	13	447	24	39203	1.1e-16	2.1e-15	// GRMZM2G054916 // GRMZM2G446253 // GRMZM2G140116 // GRMZM2G080045 // GRMZM2G074267 // GRMZM2G090568 // GRMZM2G123940 // GRMZM2G104847 // GRMZM2G181153 // GRMZM2G300135 // GRMZM2G010599 // GRMZM5G803334 // GRMZM2G141376
GO:0005622	C	intracellular	185	447	9403	39203	5.9e-16	1.1e-14	// GRMZM2G301553 // GRMZM2G177912 // GRMZM2G021864 // GRMZM5G825512 // GRMZM2G083427 // GRMZM2G149257 // GRMZM2G181153 // GRMZM2G118037 // GRMZM2G138349 // GRMZM2G063048 // GRMZM2G164912 // GRMZM5G832582 // GRMZM2G047813 // GRMZM2G179662 // GRMZM2G052423 // GRMZM2G099862 // GRMZM2G332562 // GRMZM2G107306 // GRMZM2G057910 // GRMZM2G169654 // GRMZM2G069594 // GRMZM2G133203 // GRMZM2G162445 // GRMZM…
GO:0030054	C	cell junction	13	447	35	39203	5.4e-15	9.1e-14	// GRMZM2G054916 // GRMZM2G446253 // GRMZM2G140116 // GRMZM2G080045 // GRMZM2G074267 // GRMZM2G090568 // GRMZM2G123940 // GRMZM2G104847 // GRMZM2G181153 // GRMZM2G300135 // GRMZM2G010599 // GRMZM5G803334 // GRMZM2G141376
GO:0005739	C	mitochondrion	26	447	354	39203	3.5e-13	5.5e-12	// GRMZM2G067225 // GRMZM2G116517 // GRMZM2G301194 // GRMZM2G446253 // GRMZM2G704150 // GRMZM2G004211 // GRMZM2G173209 // GRMZM5G832582 // GRMZM2G100714 // GRMZM2G079477 // GRMZM5G821551 // GRMZM2G401139 // GRMZM2G039251 // GRMZM2G412611 // GRMZM2G078641 // GRMZM2G090568 // GRMZM2G466833 // GRMZM2G030123 // GRMZM2G058057 // GRMZM2G069229 // GRMZM2G096764 // GRMZM2G117811 // GRMZM2G148904 // GRMZM…
GO:0005730	C	nucleolus	9	447	12	39203	7.1e-13	1.1e-11	// GRMZM2G140116 // GRMZM2G047813 // GRMZM2G068471 // GRMZM2G149257 // GRMZM2G181153 // GRMZM2G010599 // GRMZM2G115925 // GRMZM2G084465 // GRMZM2G024354
GO:0016020	C	membrane	116	447	5307	39203	3.4e-12	4.9e-11	// GRMZM2G177912 // GRMZM2G158807 // GRMZM2G083427 // GRMZM2G034668 // GRMZM2G181153 // GRMZM2G118037 // GRMZM2G138349 // GRMZM2G168304 // GRMZM2G331417 // GRMZM2G105192 // GRMZM2G063048 // GRMZM5G832582 // GRMZM2G010765 // GRMZM2G107306 // GRMZM2G078292 // GRMZM2G054916 // GRMZM2G036534 // GRMZM2G086730 // GRMZM2G090568 // GRMZM2G119894 // GRMZM2G471142 // GRMZM2G173317 // AC234157.1_FG002 // GR…
GO:0031967	C	organelle envelope	23	447	310	39203	6.7e-12	9.3e-11	// GRMZM2G067225 // GRMZM2G116517 // GRMZM2G446253 // GRMZM2G004211 // GRMZM5G826194 // GRMZM2G128454 // GRMZM2G063048 // GRMZM2G175989 // GRMZM2G401139 // GRMZM2G130358 // GRMZM2G412611 // GRMZM2G036534 // GRMZM2G078641 // GRMZM2G090568 // AC234157.1_FG002 // GRMZM2G537291 // GRMZM2G069229 // GRMZM2G036921 // GRMZM2G117811 // GRMZM2G018375 // GRMZM2G084389 // GRMZM2G060011 // GRMZM2G018417
GO:0031974	C	membrane-enclosed lumen	19	447	214	39203	2.7e-11	3.6e-10	// GRMZM2G064371 // GRMZM2G084465 // GRMZM2G116517 // GRMZM2G047813 // GRMZM2G024354 // GRMZM2G118250 // GRMZM2G178537 // GRMZM2G068471 // GRMZM2G087435 // GRMZM2G076544 // GRMZM2G348873 // GRMZM2G149257 // GRMZM2G181153 // GRMZM2G010599 // GRMZM2G115925 // GRMZM2G140116 // GRMZM2G130207 // GRMZM2G155753 // GRMZM2G162445
GO:0070013	C	intracellular organelle lumen	18	447	189	39203	3.1e-11	3.8e-10	// GRMZM2G064371 // GRMZM2G084465 // GRMZM2G047813 // GRMZM2G024354 // GRMZM2G118250 // GRMZM2G178537 // GRMZM2G068471 // GRMZM2G087435 // GRMZM2G076544 // GRMZM2G348873 // GRMZM2G149257 // GRMZM2G181153 // GRMZM2G010599 // GRMZM2G115925 // GRMZM2G140116 // GRMZM2G130207 // GRMZM2G155753 // GRMZM2G162445
GO:0043233	C	organelle lumen	18	447	189	39203	3.1e-11	3.8e-10	// GRMZM2G064371 // GRMZM2G084465 // GRMZM2G047813 // GRMZM2G024354 // GRMZM2G118250 // GRMZM2G178537 // GRMZM2G068471 // GRMZM2G087435 // GRMZM2G076544 // GRMZM2G348873 // GRMZM2G149257 // GRMZM2G181153 // GRMZM2G010599 // GRMZM2G115925 // GRMZM2G140116 // GRMZM2G130207 // GRMZM2G155753 // GRMZM2G162445
GO:0009579	C	thylakoid	15	447	122	39203	5.3e-11	6.2e-10	// GRMZM2G175989 // GRMZM2G065950 // GRMZM2G348873 // GRMZM2G067225 // GRMZM2G036921 // GRMZM2G090271 // GRMZM2G087435 // GRMZM2G076544 // GRMZM2G063048 // GRMZM2G018375 // GRMZM2G181153 // GRMZM2G128454 // GRMZM2G136960 // GRMZM2G155753 // GRMZM2G038519
GO:0031975	C	envelope	23	447	359	39203	1.1e-10	1.2e-09	// GRMZM2G067225 // GRMZM2G116517 // GRMZM2G446253 // GRMZM2G004211 // GRMZM5G826194 // GRMZM2G128454 // GRMZM2G063048 // GRMZM2G175989 // GRMZM2G401139 // GRMZM2G130358 // GRMZM2G412611 // GRMZM2G036534 // GRMZM2G078641 // GRMZM2G090568 // AC234157.1_FG002 // GRMZM2G537291 // GRMZM2G069229 // GRMZM2G036921 // GRMZM2G117811 // GRMZM2G018375 // GRMZM2G084389 // GRMZM2G060011 // GRMZM2G018417
GO:0031090	C	organelle membrane	25	447	456	39203	3.6e-10	3.9e-09	// GRMZM2G067225 // GRMZM2G177912 // GRMZM2G348873 // GRMZM2G166976 // GRMZM2G076544 // GRMZM2G181153 // GRMZM2G128454 // GRMZM2G059106 // GRMZM2G038519 // GRMZM2G140116 // GRMZM2G107306 // GRMZM2G052423 // GRMZM2G136960 // GRMZM2G084389 // GRMZM2G065950 // GRMZM2G401139 // AC199911.5_FG001 // GRMZM2G173317 // GRMZM2G178190 // GRMZM2G003769 // GRMZM2G069229 // GRMZM2G117811 // GRMZM2G316534 // GR…
GO:0005618	C	cell wall	16	447	172	39203	5.4e-10	5.6e-09	// GRMZM2G039251 // GRMZM2G036921 // GRMZM2G132273 // GRMZM2G128268 // GRMZM2G074267 // GRMZM2G090568 // GRMZM2G123940 // GRMZM2G063676 // GRMZM2G142437 // GRMZM2G466833 // GRMZM2G119691 // GRMZM2G078641 // GRMZM2G171484 // GRMZM2G141376 // GRMZM2G163998 // GRMZM2G019325
GO:0044459	C	plasma membrane part	14	447	130	39203	1.1e-09	1.2e-08	// GRMZM2G054916 // GRMZM2G446253 // GRMZM2G140116 // GRMZM2G080045 // GRMZM2G074267 // GRMZM2G090568 // GRMZM2G123940 // GRMZM2G010599 // GRMZM2G104847 // GRMZM2G181153 // GRMZM2G300135 // GRMZM2G001660 // GRMZM5G803334 // GRMZM2G141376
GO:0030312	C	external encapsulating structure	16	447	219	39203	1.3e-08	1.3e-07	// GRMZM2G039251 // GRMZM2G036921 // GRMZM2G132273 // GRMZM2G128268 // GRMZM2G074267 // GRMZM2G090568 // GRMZM2G123940 // GRMZM2G063676 // GRMZM2G142437 // GRMZM2G466833 // GRMZM2G119691 // GRMZM2G078641 // GRMZM2G171484 // GRMZM2G141376 // GRMZM2G163998 // GRMZM2G019325
GO:0042651	C	thylakoid membrane	8	447	34	39203	2.1e-08	2e-07	// GRMZM2G065950 // GRMZM2G067225 // GRMZM2G348873 // GRMZM2G076544 // GRMZM2G128454 // GRMZM2G136960 // GRMZM2G155753 // GRMZM2G038519
GO:0009505	C	plant-type cell wall	6	447	11	39203	2.2e-08	2e-07	// GRMZM2G036921 // GRMZM2G128268 // GRMZM2G074267 // GRMZM2G123940 // GRMZM2G163998 // GRMZM2G141376
GO:0044428	C	nuclear part	16	447	233	39203	3e-08	2.7e-07	// GRMZM2G140116 // GRMZM2G086779 // GRMZM2G047813 // GRMZM2G118250 // GRMZM5G825512 // GRMZM2G178537 // GRMZM2G068471 // GRMZM2G024354 // GRMZM2G010599 // GRMZM2G149257 // GRMZM2G181153 // GRMZM2G078641 // GRMZM2G115925 // GRMZM2G084465 // GRMZM2G130207 // GRMZM2G162445
GO:0031981	C	nuclear lumen	13	447	150	39203	4.9e-08	4.2e-07	// GRMZM2G140116 // GRMZM2G047813 // GRMZM2G118250 // GRMZM2G178537 // GRMZM2G068471 // GRMZM2G024354 // GRMZM2G149257 // GRMZM2G181153 // GRMZM2G010599 // GRMZM2G115925 // GRMZM2G084465 // GRMZM2G130207 // GRMZM2G162445
GO:0044436	C	thylakoid part	9	447	67	39203	2e-07	1.7e-06	// GRMZM2G065950 // GRMZM2G067225 // GRMZM2G348873 // GRMZM2G087435 // GRMZM2G076544 // GRMZM2G128454 // GRMZM2G136960 // GRMZM2G155753 // GRMZM2G038519
GO:0005777	C	peroxisome	6	447	33	39203	4.7e-06	3.8e-05	// GRMZM2G003769 // GRMZM2G150248 // GRMZM2G090568 // GRMZM2G046900 // GRMZM2G004211 // GRMZM5G861357
GO:0042579	C	microbody	6	447	33	39203	4.7e-06	3.8e-05	// GRMZM2G003769 // GRMZM2G150248 // GRMZM2G090568 // GRMZM2G046900 // GRMZM2G004211 // GRMZM5G861357
GO:0033279	C	ribosomal subunit	10	447	171	39203	4.4e-05	0.00034	// GRMZM2G099657 // GRMZM2G140116 // GRMZM2G122290 // GRMZM2G411764 // GRMZM2G149257 // GRMZM2G010599 // GRMZM2G084465 // AC234157.1_FG002 // GRMZM2G024354 // GRMZM2G019325
GO:0034357	C	photosynthetic membrane	8	447	112	39203	6.8e-05	0.00052	// GRMZM2G065950 // GRMZM2G067225 // GRMZM2G348873 // GRMZM2G076544 // GRMZM2G128454 // GRMZM2G136960 // GRMZM2G155753 // GRMZM2G038519
GO:0015934	C	large ribosomal subunit	6	447	72	39203	0.00026	0.0019	// GRMZM2G140116 // GRMZM2G122290 // GRMZM2G411764 // GRMZM2G149257 // GRMZM2G010599 // GRMZM2G024354
GO:0005794	C	Golgi apparatus	8	447	138	39203	0.00027	0.0019	// GRMZM2G065950 // GRMZM2G164912 // GRMZM2G083427 // AC199911.5_FG001 // GRMZM2G316534 // GRMZM2G170047 // GRMZM2G138349 // GRMZM2G059106
GO:0005783	C	endoplasmic reticulum	10	447	230	39203	0.00044	0.0031	// GRMZM2G065950 // GRMZM2G152127 // GRMZM2G140116 // AC233893.1_FG003 // GRMZM2G075655 // GRMZM2G014854 // GRMZM2G083427 // GRMZM2G173317 // GRMZM2G064371 // GRMZM2G140949
GO:0015630	C	microtubule cytoskeleton	9	447	191	39203	0.00048	0.0033	// GRMZM2G360541 // GRMZM2G301194 // GRMZM2G100714 // GRMZM2G172932 // GRMZM2G112337 // GRMZM2G122965 // GRMZM2G074262 // GRMZM2G346133 // GRMZM2G037472
GO:0044425	C	membrane part	50	447	2684	39203	0.00054	0.0036	// GRMZM2G177912 // GRMZM2G143512 // GRMZM2G446253 // GRMZM2G166976 // GRMZM2G127338 // GRMZM2G001660 // GRMZM2G034668 // GRMZM2G181153 // GRMZM2G119894 // GRMZM2G128454 // GRMZM2G059106 // GRMZM2G434910 // GRMZM2G331417 // GRMZM2G105192 // GRMZM2G076593 // GRMZM2G140116 // GRMZM5G862882 // GRMZM2G083094 // GRMZM2G332562 // GRMZM2G106177 // GRMZM2G151406 // GRMZM2G149315 // GRMZM2G078292 // GRMZM…
GO:0044445	C	cytosolic part	8	447	160	39203	0.00068	0.0045	// GRMZM2G140116 // GRMZM2G446253 // GRMZM2G411764 // GRMZM2G149257 // GRMZM2G010599 // GRMZM2G084465 // GRMZM2G024354 // GRMZM2G019325
GO:0044430	C	cytoskeletal part	9	447	229	39203	0.0016	0.011	// GRMZM2G360541 // GRMZM2G301194 // GRMZM2G100714 // GRMZM2G172932 // GRMZM2G112337 // GRMZM2G122965 // GRMZM2G074262 // GRMZM2G346133 // GRMZM2G037472
GO:0005654	C	nucleoplasm	5	447	138	39203	0.023	0.15	// GRMZM2G115925 // GRMZM2G118250 // GRMZM2G130207 // GRMZM2G178537 // GRMZM2G162445
GO:0005874	C	microtubule	5	447	167	39203	0.046	0.28	// GRMZM2G360541 // GRMZM2G112337 // GRMZM2G037472 // GRMZM2G074262 // GRMZM2G172932
GO:0032991	C	macromolecular complex	52	447	3586	39203	0.046	0.28	// GRMZM2G360541 // GRMZM2G099657 // GRMZM2G047813 // GRMZM2G301194 // GRMZM5G825512 // GRMZM2G122965 // GRMZM2G149257 // GRMZM2G181153 // GRMZM2G010599 // GRMZM2G115925 // GRMZM2G130207 // GRMZM2G346133 // GRMZM2G331417 // GRMZM2G001660 // GRMZM2G177912 // GRMZM2G090172 // GRMZM2G075104 // GRMZM2G411764 // GRMZM2G019325 // GRMZM2G086779 // GRMZM2G172932 // GRMZM2G069594 // GRMZM2G177098 // GRMZM…
GO:0000151	C	ubiquitin ligase complex	5	447	168	39203	0.047	0.28	// GRMZM2G062499 // GRMZM2G075104 // GRMZM2G152919 // GRMZM2G073310 // GRMZM2G136313
GO:0043234	C	protein complex	29	447	1824	39203	0.048	0.28	// GRMZM2G360541 // GRMZM2G177912 // GRMZM2G301194 // GRMZM5G825512 // GRMZM2G172932 // GRMZM2G122965 // GRMZM2G130207 // GRMZM2G331417 // GRMZM2G001660 // GRMZM2G090172 // GRMZM2G075104 // GRMZM2G346133 // GRMZM2G335419 // GRMZM2G162445 // GRMZM2G037472 // GRMZM2G401139 // GRMZM2G446253 // GRMZM2G074267 // GRMZM2G074262 // GRMZM2G112337 // GRMZM2G136313 // GRMZM2G069229 // GRMZM2G152919 // GRMZM…
GO:0005634	C	nucleus	47	447	3212	39203	0.049	0.28	// GRMZM2G041223 // GRMZM2G124524 // GRMZM2G047813 // GRMZM2G348873 // GRMZM2G118250 // GRMZM5G825512 // GRMZM2G115925 // GRMZM2G099657 // GRMZM2G149257 // GRMZM2G181153 // GRMZM2G086779 // GRMZM2G105335 // GRMZM2G130207 // GRMZM2G059102 // GRMZM2G171365 // GRMZM2G140116 // GRMZM2G099862 // GRMZM2G363437 // GRMZM2G083091 // GRMZM2G308034 // GRMZM2G169654 // GRMZM2G049661 // GRMZM2G121115 // GRMZM…
GO:0016021	C	integral to membrane	33	447	2156	39203	0.056	0.32	// GRMZM2G143512 // GRMZM2G166976 // GRMZM2G106177 // GRMZM2G034668 // GRMZM2G128454 // GRMZM2G119894 // GRMZM2G059106 // GRMZM2G434910 // GRMZM2G149315 // GRMZM2G105192 // GRMZM2G076593 // GRMZM5G862882 // GRMZM2G083094 // GRMZM2G332562 // GRMZM2G127338 // GRMZM2G151406 // GRMZM2G078292 // GRMZM2G084389 // GRMZM2G086730 // GRMZM2G080045 // GRMZM2G074267 // GRMZM2G104092 // GRMZM2G149576 // GRMZM…
GO:0031224	C	intrinsic to membrane	33	447	2183	39203	0.064	0.35	// GRMZM2G143512 // GRMZM2G166976 // GRMZM2G106177 // GRMZM2G034668 // GRMZM2G128454 // GRMZM2G119894 // GRMZM2G059106 // GRMZM2G434910 // GRMZM2G149315 // GRMZM2G105192 // GRMZM2G076593 // GRMZM5G862882 // GRMZM2G083094 // GRMZM2G332562 // GRMZM2G127338 // GRMZM2G151406 // GRMZM2G078292 // GRMZM2G084389 // GRMZM2G086730 // GRMZM2G080045 // GRMZM2G074267 // GRMZM2G104092 // GRMZM2G149576 // GRMZM…
GO:0005856	C	cytoskeleton	10	447	513	39203	0.074	0.4	// GRMZM2G360541 // GRMZM2G301194 // GRMZM2G100714 // GRMZM2G172932 // GRMZM2G112337 // GRMZM2G122965 // GRMZM2G074262 // GRMZM2G346133 // GRMZM2G174797 // GRMZM2G037472
GO:0005740	C	mitochondrial envelope	6	447	280	39203	0.11	0.57	// GRMZM2G401139 // GRMZM2G116517 // GRMZM2G069229 // GRMZM2G446253 // GRMZM2G117811 // GRMZM2G018417
GO:0044429	C	mitochondrial part	6	447	309	39203	0.15	0.77	// GRMZM2G401139 // GRMZM2G116517 // GRMZM2G069229 // GRMZM2G446253 // GRMZM2G117811 // GRMZM2G018417
GO:0043232	C	intracellular non-membrane-bounded organelle	35	447	2597	39203	0.18	0.9	// GRMZM2G360541 // GRMZM2G099657 // GRMZM2G047813 // GRMZM2G301194 // GRMZM5G825512 // GRMZM2G122965 // GRMZM2G149257 // GRMZM2G181153 // GRMZM2G115925 // GRMZM2G140116 // GRMZM2G100714 // GRMZM2G068471 // GRMZM2G411764 // GRMZM2G172932 // GRMZM2G069594 // GRMZM2G177098 // GRMZM2G132623 // GRMZM2G162445 // GRMZM2G037472 // GRMZM2G084465 // GRMZM2G130358 // GRMZM2G036534 // GRMZM2G346133 // GRMZM…
GO:0043228	C	non-membrane-bounded organelle	35	447	2597	39203	0.18	0.9	// GRMZM2G360541 // GRMZM2G099657 // GRMZM2G047813 // GRMZM2G301194 // GRMZM5G825512 // GRMZM2G122965 // GRMZM2G149257 // GRMZM2G181153 // GRMZM2G115925 // GRMZM2G140116 // GRMZM2G100714 // GRMZM2G068471 // GRMZM2G411764 // GRMZM2G172932 // GRMZM2G069594 // GRMZM2G177098 // GRMZM2G132623 // GRMZM2G162445 // GRMZM2G037472 // GRMZM2G084465 // GRMZM2G130358 // GRMZM2G036534 // GRMZM2G346133 // GRMZM…
GO:0030529	C	ribonucleoprotein complex	21	447	1484	39203	0.19	0.93	// GRMZM2G060324 // GRMZM2G099657 // GRMZM2G084465 // GRMZM2G130358 // GRMZM2G036534 // GRMZM2G090271 // GRMZM2G122290 // GRMZM2G090568 // GRMZM2G411764 // GRMZM2G115925 // GRMZM2G010599 // GRMZM2G171484 // GRMZM2G149257 // GRMZM2G086779 // GRMZM2G177098 // GRMZM2G069594 // GRMZM2G140116 // GRMZM2G132623 // AC234157.1_FG002 // GRMZM2G024354 // GRMZM2G019325
GO:0005840	C	ribosome	18	447	1390	39203	0.33	1	// GRMZM2G099657 // GRMZM2G084465 // GRMZM2G130358 // GRMZM2G036534 // GRMZM2G090271 // GRMZM2G122290 // GRMZM2G090568 // GRMZM2G411764 // GRMZM2G010599 // GRMZM2G171484 // GRMZM2G149257 // GRMZM2G177098 // GRMZM2G069594 // GRMZM2G140116 // GRMZM2G132623 // AC234157.1_FG002 // GRMZM2G024354 // GRMZM2G019325
GO:0005576	C	extracellular region	8	447	583	39203	0.35	1	// GRMZM2G132169 // GRMZM2G446253 // GRMZM2G126261 // GRMZM2G090568 // GRMZM2G067485 // GRMZM2G466833 // GRMZM2G174598 // GRMZM2G141376
GO:0005694	C	chromosome	5	447	661	39203	0.87	1	// GRMZM2G047813 // GRMZM5G825512 // GRMZM2G162445 // GRMZM2G181153 // GRMZM2G021044

## Sheet: darkviolet
GO_acc	term_type	Term	queryitem	querytotal	bgitem	bgtotal	pvalue	FDR	entries
GO:0010033	P	response to organic substance	60	786	72	39203	2.5e-66	4.3e-63	// GRMZM2G008166 // GRMZM5G856738 // GRMZM2G437460 // GRMZM2G170148 // GRMZM2G102845 // GRMZM2G162413 // GRMZM5G874163 // GRMZM2G428554 // GRMZM2G178079 // GRMZM2G061950 // GRMZM5G886989 // GRMZM2G064954 // GRMZM2G176307 // GRMZM2G017237 // GRMZM2G074427 // GRMZM2G133023 // GRMZM2G057955 // GRMZM2G011919 // GRMZM2G082487 // GRMZM2G045243 // GRMZM2G144744 // GRMZM2G134708 // GRMZM2G163154 // GRMZM…
[truncated: 479 more rows]

## Sheet: grey60
GO_acc	term_type	Term	queryitem	querytotal	bgitem	bgtotal	pvalue	FDR	entries
[truncated: 440 more rows]

## Sheet: maroon
GO_acc	term_type	Term	queryitem	querytotal	bgitem	bgtotal	pvalue	FDR	entries
[truncated: 513 more rows]

## Sheet: orangered3
GO_acc	term_type	Term	queryitem	querytotal	bgitem	bgtotal	pvalue	FDR	entries
[truncated: 628 more rows]

[truncated: 24 more sheets: plum, plum1, steelblue, antiquewhite4, black, brown, brown2, coral2, darkorange2, darkred, darkseagreen4, firebrick4, floralwhite, honeydew1, indianred4, sienna3, lavenderblush3, lightgreen, mediumorchid, navajowhite2 …]
